# Supplementary material for: Palladium-catalysed asymmetric cascade transformations of 4-alken-2-ynyl carbonates to construct complex frameworks
Source: Royal Society of Chemistry journal article supplement (doi:10.1039/d4sc07823c), 2024-12-27

# Palladium-catalysed asymmetric cascade transformations of 4-alken-2-ynyl carbonates to construct complex frameworks

Ze-Liang He,<sup>a</sup> Li Li,<sup>a</sup> Zhi-Chao Chen,<sup>\*a</sup> Wei Du,<sup>a</sup> and Ying-Chun Chen<sup>\*ab</sup>

<sup>a</sup>Key Laboratory of Drug-Targeting and Drug Delivery System of the Ministry of Education and Sichuan Research Center for Drug Precision Industrial Technology, West China School of Pharmacy, Sichuan University, Chengdu 610041, China

<sup>b</sup>College of Pharmacy, Third Military Medical University, Shapingba, Chongqing 400038, China

Email: chenzhichao@scu.edu.cn; ycchen@scu.edu.cn

## Supplementary Information

|                                                                                                      |            |
|------------------------------------------------------------------------------------------------------|------------|
| <b>1. General methods</b> .....                                                                      | <b>S1</b>  |
| <b>2. Preparation and characterisation of substrates</b> .....                                       | <b>S2</b>  |
| <b>3. Detailed condition optimisations</b> .....                                                     | <b>S12</b> |
| <b>4. General procedure for the reactions of achiral 4-alken-2-ynyl carbonates</b> .....             | <b>S15</b> |
| <b>4.1 General procedure for synthesis of 3 and 5</b> .....                                          | <b>S15</b> |
| <b>4.2 Procedure for asymmetric synthesis of 7 and 9</b> .....                                       | <b>S31</b> |
| <b>5 General procedure for reactions of racemic 1-alkyl-substituted 4-alken-2-ynyl carbonates</b> 10 |            |
| .....                                                                                                | <b>S32</b> |
| <b>6. Transformations of 1-aryl-4-alken-2-ynyl carbonates</b> .....                                  | <b>S49</b> |
| <b>7. Unsuccessful substrates exploration</b> .....                                                  | <b>S52</b> |
| <b>8. Transformations of product 12a</b> .....                                                       | <b>S53</b> |
| <b>9. Preliminary mechanism investigation</b> .....                                                  | <b>S56</b> |
| <b>10. Crystal data and structural refinement</b> .....                                              | <b>S58</b> |
| <b>11. NMR, HRMS spectra and HPLC chromatograms</b> .....                                            | <b>S65</b> |

## 1. General methods

Unless otherwise noted, the reactions were carried out under ambient atmosphere; when the reactions required heating, the heat source was oil bath.  $^1\text{H}$  NMR (400 or 600 MHz),  $^{13}\text{C}$  NMR (100 or 150 MHz) and  $^{19}\text{F}$  NMR (375 MHz) spectra were recorded on Varian INOVA-400/54, Agilent DD2-600/54 or Bruker Ascend<sup>TM</sup> 400 instruments (Chemical shifts were reported in ppm from tetramethylsilane with the solvent resonance as the internal standard in  $\text{CDCl}_3$  solution, unless otherwise noted). The following abbreviations were used to explain the multiplicities: s = singlet, d = doublet, t = triplet, q = quartet, dd = double doublet, m = multiplet and coupling constants ( $J$ ) are reported in Hertz (Hz). High resolution mass spectra (HRMS) were recorded on a Waters SYNAPT G2 or Agilent G1969-85000 using a time-of-flight mass spectrometer equipped with electrospray ionization (ESI) source. X-ray diffraction experiments were carried out on an Agilent Gemini or Bruker D8 Venture and the data obtained were deposited at the Cambridge Crystallographic Data Centre (CCDC 2381131–2381135). In each case, diastereomeric ratio was determined by  $^1\text{H}$  NMR analysis and enantiomeric excess was determined by HPLC (Agilent Technologies: 1220 Infinity II, 1200 Series, 1260 Infinity) analysis on a chiral column in comparison with authentic racemate, using a Daicel Chiralpak AD-H Column (250  $\times$  4.6 mm), Chiralpak IA Column (250  $\times$  4.6 mm), Chiralpak IB Column (250  $\times$  4.6mm), IBN-5 Column (250  $\times$  4.6 mm), Chiralpak ID Column (250  $\times$  4.6 mm), Chiralpak IE Column(250  $\times$  4.6 mm), Chiralpak IF Column (250  $\times$  4.6 mm). UV detection was monitored at 220 nm or 254 nm. Optical rotation was measured in  $\text{CHCl}_3$  solution at 25  $^\circ\text{C}$ . Column chromatography was performed on silica gel (200–300 mesh) eluting with EtOAc and petroleum ether. TLC was performed on glass-backed silica plates. UV light,  $\text{I}_2$ , and solution of potassium permanganate were used to visualize products or starting materials. All chemicals were used without purification as commercially available unless otherwise noted. Petroleum ether and EtOAc were redistilled. Experiments involving moisture and/or air sensitive components were performed under a positive pressure of argon in oven-dried glassware equipped with a rubber septum inlet. Toluene was freshly distilled from  $\text{CaH}_2$  under an atmosphere of dry argon. Dried solvents reagents were transferred by oven-dried syringe.

## 2. Preparation and characterization of substrates

### 2.1 General procedure for the preparation of 4-alken-2-ynyl carbonates<sup>1</sup>

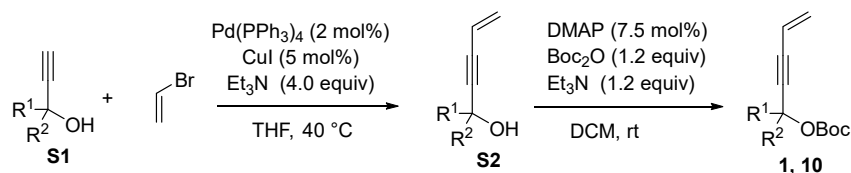

To an oven-dried flask were added CuI (57 mg, 0.3 mmol) and Pd(PPh<sub>3</sub>)<sub>4</sub> (346 mg, 0.3 mmol). The flask was capped, purged and back-filled with argon for five times. Dry THF (20 mL), propargylic alcohol **S1** (10 mmol), vinyl bromide (1.0 M in THF, 15 mL, 15 mmol) and triethylamine (5 mL, 40 mmol) were added sequentially via syringe. The mixture was stirred at 40 °C until complete consumption of **S1**. The mixture was cooled to room temperature and filtered. The filtrate was concentrated under reduced pressure, and the residue was purified by flash column chromatography to give **S2**.

To a solution of **S2** (10 mmol) in DCM (30 mL) were added triethylamine (1.7 mL, 12 mmol) and Boc<sub>2</sub>O (2.6 g, 12 mmol) followed by DMAP (92 mg, 0.75 mmol). The mixture was stirred at room temperature overnight and then poured into water. The phases were separated and the aqueous phase was extracted three times with DCM. The combined organic phases were washed with brine, dried over anhydrous Na<sub>2</sub>SO<sub>4</sub>, filtered and the filtrate was concentrated and the residue was purified by flash column chromatography to give substrate **1** or **10**.

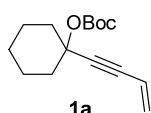

**1-(But-3-en-1-yn-1-yl)cyclohexyl tert-butyl carbonate (1a):** eluent (petroleum ether/ethyl acetate = 75/1); colourless oil; 71% yield; <sup>1</sup>H NMR (400 MHz, CDCl<sub>3</sub>): δ (ppm) 5.86 (dd, *J* = 17.6, 11.2 Hz, 1H), 5.64 (dd, *J* = 17.6, 2.4 Hz, 1H), 5.48 (dd, *J* = 11.2, 2.0 Hz, 1H), 2.24–2.14 (m, 2H), 1.89–1.78 (m, 2H), 1.73–1.55 (m, 5H), 1.49 (s, 9H), 1.34–1.25 (m, 1H); <sup>13</sup>C NMR (100 MHz, CDCl<sub>3</sub>): δ (ppm) 151.3, 127.1, 116.8, 89.4, 85.1, 81.9, 37.1, 27.8, 25.2, 22.8; HRMS (ESI-TOF) *m/z*: [M + Na]<sup>+</sup> Calcd for C<sub>15</sub>H<sub>22</sub>O<sub>3</sub>Na<sup>+</sup> 273.1461; Found 273.1459.

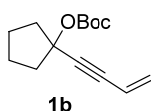

**1-(But-3-en-1-yn-1-yl)cyclopentyl tert-butyl carbonate (1b):** eluent (petroleum ether/ethyl acetate = 75/1); colorless oil; 72% yield; <sup>1</sup>H NMR (400 MHz, CDCl<sub>3</sub>): δ (ppm) 5.89–5.77 (m, 1H), 5.61 (dd, *J* = 17.6, 2.0 Hz, 1H), 5.46 (dd, *J* = 11.2, 2.4 Hz, 1H), 2.32–2.25 (m, 2H), 2.17–2.09 (m, 2H), 1.81–1.72 (m, 4H), 1.50 (s, 9H); <sup>13</sup>C NMR (100 MHz, CDCl<sub>3</sub>): δ (ppm) 151.8, 127.1, 116.8, 90.0, 83.4, 82.5, 82.1, 40.5, 27.8, 23.4; HRMS (ESI-TOF) *m/z*:

$[M + Na]^+$  Calcd for  $C_{14}H_{20}O_3Na^+$  259.1305; Found 259.1304.

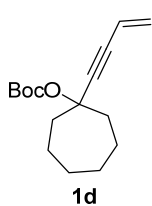

**1-(But-3-en-1-yn-1-yl)cycloheptyl *tert*-butyl carbonate (1d):** eluent (petroleum ether/ethyl acetate = 70/1); colourless oil; 66% yield;  $^1H$  NMR (400 MHz,  $CDCl_3$ ):  $\delta$  (ppm) 5.85 (dd,  $J = 17.6, 11.2$  Hz, 1H), 5.63 (dd,  $J = 17.6, 2.0$  Hz, 1H), 5.47 (dd,  $J = 11.2, 2.0$  Hz, 1H), 2.31–2.24 (m, 2H), 2.15–2.06 (m, 2H), 1.66–1.55 (m, 8H), 1.49 (s, 9H);  $^{13}C$  NMR (100 MHz,  $CDCl_3$ ):  $\delta$  (ppm) 151.4, 127.1, 116.9, 90.6, 84.2, 81.9, 80.7, 40.1, 28.2, 27.9, 22.2; HRMS (ESI-TOF)  $m/z$ :  $[M + Na]^+$  Calcd for  $C_{16}H_{24}O_3Na^+$  287.1618; Found 287.1624.

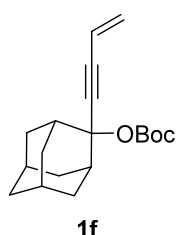

**2-(But-3-en-1-yn-1-yl)adamantan-2-yl *tert*-butyl carbonate (1f):** eluent (petroleum ether/ethyl acetate = 75/1); colourless oil; 65% yield;  $^1H$  NMR (400 MHz,  $CDCl_3$ ):  $\delta$  (ppm) 5.86 (dd,  $J = 17.6, 11.2$  Hz, 1H), 5.62 (dd,  $J = 17.6, 2.4$  Hz, 1H), 5.46 (dd,  $J = 11.2, 2.4$  Hz, 1H), 2.50 (s, 2H), 2.17 (d,  $J = 12.4$  Hz, 2H), 2.06 (d,  $J = 12.0$  Hz, 2H), 1.83–1.70 (m, 6H), 1.63–1.57 (m, 2H), 1.50 (s, 9H);  $^{13}C$  NMR (100

MHz,  $CDCl_3$ ):  $\delta$  (ppm) 151.4, 126.9, 116.9, 90.0, 85.6, 81.7, 81.6, 37.5, 36.1, 35.0, 31.9, 27.9, 26.8, 26.3; HRMS (ESI-TOF)  $m/z$ :  $[M + Na]^+$  Calcd for  $C_{19}H_{26}O_3Na^+$  325.1774; Found 325.1771.

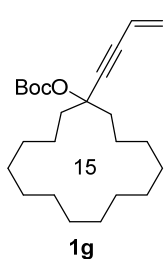

**1-(But-3-en-1-yn-1-yl)cyclopentadecyl *tert*-butyl carbonate (1g):** eluent (petroleum ether/ethyl acetate = 70/1); colourless oil; 66% yield;  $^1H$  NMR (400 MHz,  $CDCl_3$ ):  $\delta$  (ppm) 5.84 (dd,  $J = 17.6, 11.2$  Hz, 1H), 5.62 (dd,  $J = 17.6, 2.0$  Hz, 1H), 5.46 (dd,  $J = 11.2, 2.0$  Hz, 1H), 2.12–2.02 (m, 2H), 1.95–1.81 (m, 2H), 1.49 (s, 9H), 1.45–1.21 (m, 24H);  $^{13}C$  NMR (100 MHz,  $CDCl_3$ ):  $\delta$  (ppm) 150.3, 126.1, 115.8, 89.0,

83.3, 80.8, 78.8, 35.5, 26.8, 26.2, 25.9, 25.6, 25.4, 20.7; HRMS (ESI-TOF)  $m/z$ :  $[M + Na]^+$  Calcd for  $C_{24}H_{40}O_3Na^+$  399.2870; Found 399.2870.

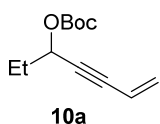

***tert*-Butyl hept-6-en-4-yn-3-yl carbonate (10a):** eluent (petroleum ether/ethyl acetate = 75/1); colourless oil; 69% yield;  $^1H$  NMR (400 MHz,  $CDCl_3$ ):  $\delta$  (ppm) 5.87–5.74 (m, 1H), 5.66 (dd,  $J = 17.6, 2.4$  Hz, 1H), 5.50 (dd,  $J = 11.2, 2.4$  Hz, 1H), 5.25 (t,  $J = 6.4$  Hz, 1H), 1.88–1.80 (m, 2H), 1.50 (s, 9H), 1.03 (t,  $J = 7.6$  Hz, 3H);  $^{13}C$  NMR (150 MHz,  $CDCl_3$ ):  $\delta$  (ppm) 152.7, 127.8, 116.5, 86.6, 84.4, 82.6, 68.5, 28.2, 27.7, 9.4; HRMS (ESI-TOF)  $m/z$ :

$[M + Na]^+$  Calcd for  $C_{12}H_{18}O_3Na^+$  233.1148; Found 233.1141.

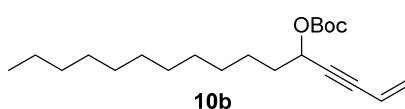

**tert-Butyl hexadec-1-en-3-yn-5-yl carbonate (10b):** eluent

(petroleum ether/ethyl acetate = 80/1); colourless oil; 64% yield;

$^1\text{H}$  NMR (400 MHz,  $\text{CDCl}_3$ ):  $\delta$  (ppm) 5.87–5.75 (m, 1H), 5.65 (dd,  $J = 17.6, 2.4$  Hz, 1H), 5.49 (dd,  $J = 11.2, 2.4$  Hz, 1H), 5.34–5.23 (m, 1H), 1.86–1.75 (m, 2H), 1.50 (s, 9H), 1.47–1.41 (m, 2H), 1.30–1.21 (m, 16H), 0.88 (t,  $J = 6.8$  Hz, 3H);  $^{13}\text{C}$  NMR (150 MHz,  $\text{CDCl}_3$ ):  $\delta$  (ppm) 152.7, 127.8, 116.5, 87.0, 84.3, 82.6, 67.5, 34.9, 31.9, 29.6, 29.52, 29.51, 29.45, 29.3, 29.1, 27.8, 25.0, 22.7, 14.1; HRMS (ESI-TOF)  $m/z$ :  $[\text{M} + \text{Na}]^+$  Calcd for  $\text{C}_{21}\text{H}_{36}\text{O}_3\text{Na}^+$  359.2557; Found 359.2563.

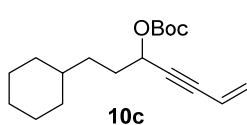

**tert-Butyl (1-cyclohexylhept-6-en-4-yn-3-yl) carbonate (10c):** eluent

(petroleum ether/ethyl acetate = 75/1); colourless oil; 76% yield;  $^1\text{H}$  NMR (400

MHz,  $\text{CDCl}_3$ ):  $\delta$  (ppm) 5.86–5.76 (m, 1H), 5.65 (dd,  $J = 17.6, 2.4$  Hz, 1H), 5.50 (dd,  $J = 11.6, 2.4$  Hz, 1H), 5.26 (t,  $J = 6.8$  Hz, 1H), 1.85–1.77 (m, 2H), 1.74–1.64 (m, 5H), 1.50 (s, 9H), 1.37–1.30 (m, 2H), 1.27–1.11 (m, 4H), 0.95–0.84 (m, 2H);  $^{13}\text{C}$  NMR (100 MHz,  $\text{CDCl}_3$ ):  $\delta$  (ppm) 152.7, 127.8, 116.5, 87.0, 84.4, 82.6, 67.8, 37.3, 33.3, 33.2, 32.5, 32.4, 27.8, 26.6, 26.3; HRMS (ESI-TOF)  $m/z$ :  $[\text{M} + \text{Na}]^+$  Calcd for  $\text{C}_{18}\text{H}_{28}\text{O}_3\text{Na}^+$  315.1931; Found 315.1936.

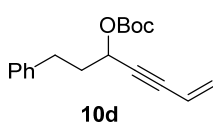

**tert-Butyl (1-phenylhept-6-en-4-yn-3-yl) carbonate (10d):** eluent (petroleum

ether/ethyl acetate = 70/1); colourless oil; 73% yield;  $^1\text{H}$  NMR (400 MHz,  $\text{CDCl}_3$ ):

$\delta$  (ppm) 7.31–7.26 (m, 2H), 7.22–7.17 (m, 3H), 5.89–5.77 (m, 1H), 5.67 (dd,  $J = 17.6, 2.4$  Hz, 1H), 5.52 (dd,  $J = 11.2, 2.4$  Hz, 1H), 5.31–5.26 (m, 1H), 2.80 (t,  $J = 8.0$  Hz, 2H), 2.20–2.08 (m, 2H), 1.50 (s, 9H);  $^{13}\text{C}$  NMR (100 MHz,  $\text{CDCl}_3$ ):  $\delta$  (ppm) 152.6, 140.7, 128.5, 128.4, 128.0, 126.1, 116.4, 86.5, 84.8, 82.7, 66.8, 36.4, 31.2, 27.8; HRMS (ESI-TOF)  $m/z$ :  $[\text{M} + \text{Na}]^+$  Calcd for  $\text{C}_{18}\text{H}_{22}\text{O}_3\text{Na}^+$  309.1461; Found 309.1467.

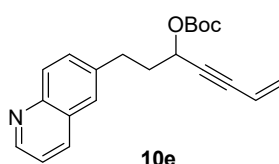

**tert-Butyl (1-(quinolin-6-yl)hept-6-en-4-yn-3-yl) carbonate (10e):** eluent

(petroleum ether/ethyl acetate = 12/1); colourless oil; 62% yield;  $^1\text{H}$  NMR

(400 MHz,  $\text{CDCl}_3$ ):  $\delta$  (ppm) 8.91–8.82 (m, 1H), 8.11–8.01 (m, 2H), 7.63–7.56 (m, 2H), 7.40–7.34 (m, 1H), 5.90–5.77 (m, 1H), 5.72–5.64 (m, 1H), 5.56–5.49 (m, 1H), 5.37–5.31 (m, 1H), 3.00 (t,  $J = 7.6$  Hz, 2H), 2.30–2.19 (m, 2H), 1.50 (s, 9H);  $^{13}\text{C}$  NMR (100 MHz,  $\text{CDCl}_3$ ):  $\delta$  (ppm) 152.6, 149.9, 147.2, 139.2, 135.6, 130.8, 129.6, 128.3, 128.2,

126.3, 121.2, 116.4, 86.4, 85.0, 82.8, 66.7, 36.1, 31.2, 27.8; HRMS (ESI-TOF)  $m/z$ :  $[M + H]^+$  Calcd for  $C_{21}H_{24}NO_3^+$  338.1751; Found 338.1747.

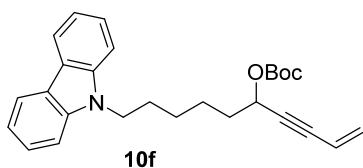

**10-(9H-carbazol-9-yl)dec-1-en-3-yn-5-yl tert-butyl carbonate**

**(10f):** eluent (petroleum ether/ethyl acetate = 15/1); colourless oil; 68%

yield;  $^1H$  NMR (400 MHz,  $CDCl_3$ ):  $\delta$  (ppm) 8.10 (d,  $J = 7.6$  Hz, 2H),

7.48–7.44 (m, 2H), 7.41–7.37 (m, 2H), 7.24–7.20 (m, 2H), 5.84–5.73

(m, 1H), 5.64 (dd,  $J = 17.6, 2.0$  Hz, 1H), 5.49 (dd,  $J = 10.8, 2.4$  Hz, 1H), 5.27 (t,  $J = 6.4$  Hz, 1H),

4.30 (t,  $J = 7.2$  Hz, 2H), 1.93–1.85 (m, 2H), 1.82–1.73 (m, 2H), 1.55–1.50 (m, 2H), 1.48 (s, 9H),

1.46–1.40 (m, 2H);  $^{13}C$  NMR (100 MHz,  $CDCl_3$ ):  $\delta$  (ppm) 152.7, 140.4, 128.0, 125.6, 122.8, 120.4,

118.8, 116.4, 108.6, 86.7, 84.6, 82.7, 67.2, 42.9, 34.7, 28.8, 27.8, 26.8, 24.7; HRMS (ESI-TOF)  $m/z$ :

$[M + Na]^+$  Calcd for  $C_{27}H_{31}NO_3Na^+$  440.2196; Found 440.2198.

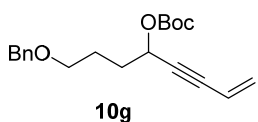

**1-(Benzyloxy)oct-7-en-5-yn-4-yl tert-butyl carbonate (10g):** eluent

(petroleum ether/ethyl acetate = 70/1); colourless oil; 75% yield;  $^1H$  NMR

(400 MHz,  $CDCl_3$ ):  $\delta$  (ppm) 7.37–7.26 (m, 5H), 5.85–5.72 (m, 1H), 5.65 (dd,

$J = 17.6, 2.0$  Hz, 1H), 5.49 (dd,  $J = 11.2, 2.4$  Hz, 1H), 5.36–5.31 (m, 1H), 4.50 (s, 2H), 3.52 (t,  $J =$

6.4 Hz, 2H), 1.96–1.89 (m, 2H), 1.83–1.76 (m, 2H), 1.49 (s, 9H);  $^{13}C$  NMR (100 MHz,  $CDCl_3$ ):  $\delta$

(ppm) 152.7, 138.5, 128.4, 127.9, 127.6, 127.6, 116.5, 86.7, 84.6, 82.7, 72.9, 69.6, 67.2, 31.8, 27.8,

25.3; HRMS (ESI-TOF)  $m/z$ :  $[M + Na]^+$  Calcd for  $C_{20}H_{26}O_4Na^+$  353.1723; Found 353.1719.

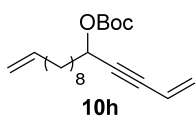

**tert-Butyl pentadeca-1,14-dien-3-yn-5-yl carbonate (10h):** eluent (petroleum

ether/ethyl acetate = 80/1); colourless oil; 67% yield;  $^1H$  NMR (400 MHz,  $CDCl_3$ ):

$\delta$  (ppm) 5.92–5.74 (m, 2H), 5.72–5.60 (m, 1H), 5.55–5.45 (m, 1H), 5.28 (t,  $J = 6.4$

Hz, 1H), 5.06–4.86 (m, 2H), 2.10–1.98 (m, 2H), 1.87–1.74 (m, 2H), 1.50 (s, 9H), 1.46–1.25 (m, 12H);

$^{13}C$  NMR (100 MHz,  $CDCl_3$ )  $\delta$  (ppm) 152.7, 139.2, 127.8, 116.5, 114.1, 87.0, 84.3, 82.6, 67.5, 34.9,

33.8, 29.4, 29.3, 29.1, 28.9, 27.8, 25.0; HRMS (ESI-TOF):  $m/z$ :  $[M + Na]^+$  Calcd for  $C_{20}H_{32}O_3Na^+$

343.2244; Found 343.2250.

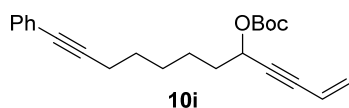

**tert-Butyl (12-phenyldodeca-1-en-3,11-diyn-5-yl) carbonate (10i):**

eluent (petroleum ether/ethyl acetate = 75/1); colourless oil; 69%

yield;  $^1H$  NMR (400 MHz,  $CDCl_3$ ):  $\delta$  (ppm) 7.42–7.36 (m, 2H), 7.31–

7.26 (m, 3H), 5.86–5.75 (m, 1H), 5.66 (dd,  $J = 17.6, 2.4$  Hz, 1H), 5.50 (dd,  $J = 11.2, 2.4$  Hz, 1H), 5.31 (t,  $J = 6.4$  Hz, 1H), 2.41 (t,  $J = 6.8$  Hz, 2H), 1.89–1.81 (m, 2H), 1.66–1.61 (m, 2H), 1.56–1.51 (m, 4H), 1.50 (s, 9H);  $^{13}\text{C}$  NMR (100 MHz,  $\text{CDCl}_3$ ):  $\delta$  (ppm) 152.7, 131.6, 128.2, 127.9, 127.5, 124.0, 116.5, 90.1, 86.8, 84.5, 82.6, 80.8, 67.4, 34.8, 28.6, 28.4, 27.8, 24.6, 19.3; HRMS (ESI-TOF)  $m/z$ :  $[\text{M} + \text{Na}]^+$  Calcd for  $\text{C}_{27}\text{H}_{28}\text{O}_3\text{Na}^+$  375.1931; Found 375.1937.

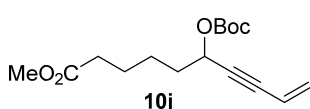

**Methyl 6-((*tert*-butoxycarbonyl)oxy)dec-9-en-7-ynoate (10j):** eluent

(petroleum ether/ethyl acetate = 30/1); colourless oil; 58% yield;  $^1\text{H}$  NMR

(400 MHz,  $\text{CDCl}_3$ ):  $\delta$  (ppm) 5.89–5.74 (m, 1H), 5.66 (dd,  $J = 17.6, 2.4$  Hz,

1H), 5.51 (dd,  $J = 10.8, 2.4$  Hz, 1H), 5.29 (t,  $J = 6.4$  Hz, 1H), 3.67 (s, 3H), 2.33 (t,  $J = 7.2$  Hz, 2H),

1.88–1.78 (m, 2H), 1.72–1.63 (m, 2H), 1.55–1.50 (m, 2H), 1.50 (s, 9H);  $^{13}\text{C}$  NMR (100 MHz,  $\text{CDCl}_3$ ):

$\delta$  (ppm) 173.9, 152.6, 128.0, 116.4, 86.6, 84.5, 82.7, 67.1, 51.6, 34.5, 33.9, 27.8, 24.6, 24.5; HRMS

(ESI-TOF)  $m/z$ :  $[\text{M} + \text{Na}]^+$  Calcd for  $\text{C}_{16}\text{H}_{24}\text{O}_5\text{Na}^+$  319.1516; Found 319.1518.

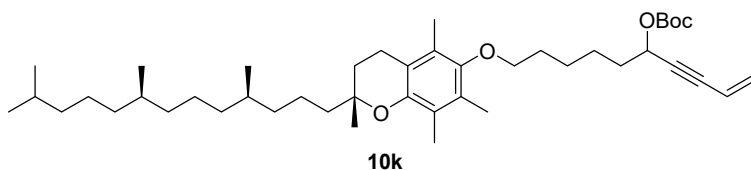

***tert*-Butyl (10-(((*R*)-2,5,7,8-tetra**

**methyl-2-((4*R*,8*R*)-4,8,12-trimethyl**

**tridecyl)chroman-6-yl)oxy)dec-1-en-**

**3-yn-5-yl) carbonate (10k):** eluent

(petroleum ether/ethyl acetate = 20/1); colourless oil; 58% yield;  $^1\text{H}$  NMR (400 MHz,  $\text{CDCl}_3$ ):  $\delta$  (ppm)

5.87–5.74 (m, 1H), 5.66 (dd,  $J = 17.6, 2.2$  Hz, 1H), 5.50 (dd,  $J = 11.0, 2.2$  Hz, 1H), 5.34–5.28 (m,

1H), 3.63 (t,  $J = 6.5$  Hz, 2H), 2.56 (t,  $J = 6.7$  Hz, 2H), 2.15 (s, 3H), 2.11 (s, 3H), 2.07 (s, 3H), 1.88–

1.71 (m, 6H), 1.58–1.52 (m, 6H), 1.50 (s, 9H), 1.45–1.23 (m, 11H), 1.22 (s, 3H), 1.18–0.97 (m, 7H),

0.94–0.74 (m, 13H);  $^{13}\text{C}$  NMR (100 MHz,  $\text{CDCl}_3$ ):  $\delta$  (ppm) 152.7, 148.3, 147.7, 127.9, 127.8, 125.8,

122.8, 117.5, 116.5, 86.9, 84.4, 82.6, 74.7, 72.8, 67.4, 40.11, 40.07, 39.4, 37.4, 37.3, 34.9, 32.80,

32.78, 32.70, 32.68, 31.30, 31.25, 30.2, 28.0, 27.8, 25.8, 24.9, 24.8, 24.4, 23.9, 22.7, 22.6, 21.1, 21.0,

20.7, 19.8, 19.7, 19.6, 12.7, 11.9, 11.8; HRMS (ESI-TOF)  $m/z$ :  $[\text{M} + \text{Na}]^+$  Calcd for  $\text{C}_{44}\text{H}_{72}\text{O}_5\text{Na}^+$

703.5272; Found 703.5270.

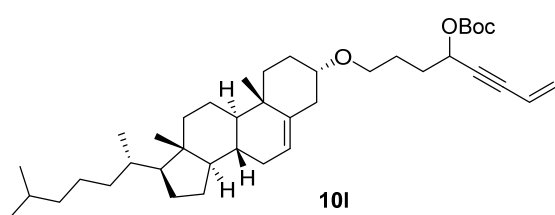

***tert*-Butyl (1-(((3*S*,8*R*,9*R*,10*S*,13*S*,14*R*,17*S*)-10,13-**

**dimethyl-17-((*S*)-6-methylheptan-2-yl)-2,3,4,7,8,9,**

**10,11,12,13,14,15,16,17-tetradecahydro-1*H*-cyclo-**

**penta[*a*]phenanthren-3-yl)oxy)oct-7-en-5-yn-4-yl)**

**carbonate (10l)**: eluent (petroleum ether/ethyl acetate = 20/1); colourless oil; 51% yield;  $^1\text{H}$  NMR (400 MHz,  $\text{CDCl}_3$ ):  $\delta$  (ppm) 5.87–5.74 (m, 1H), 5.65 (dd,  $J = 17.6, 2.4$  Hz, 1H), 5.49 (dd,  $J = 11.2, 2.4$  Hz, 1H), 5.36–5.30 (m, 2H), 3.50 (t,  $J = 6.4$  Hz, 2H), 3.17–3.08 (m, 1H), 2.38–2.32 (m, 1H), 2.18 (t,  $J = 11.8$  Hz, 1H), 2.04–1.94 (m, 2H), 1.92–1.69 (m, 7H), 1.60–1.51 (m, 3H), 1.49 (s, 9H), 1.49–1.00 (m, 17H), 1.00 (s, 3H), 1.00–0.90 (m, 4H), 0.88–0.84 (m, 6H), 0.68 (s, 3H);  $^{13}\text{C}$  NMR (150 MHz,  $\text{CDCl}_3$ ):  $\delta$  (ppm) 152.6, 141.0, 127.9, 121.5, 116.5, 86.7, 84.5, 82.6, 79.0, 67.22, 67.19, 56.8, 56.1, 50.2, 42.3, 39.8, 39.5, 39.1, 37.3, 36.9, 36.2, 35.8, 31.94, 31.88, 31.82, 28.4, 28.2, 28.0, 27.8, 25.7, 24.3, 23.8, 22.8, 22.6, 21.1, 19.4, 18.7, 11.8; HRMS (ESI-TOF)  $m/z$ :  $[\text{M} + \text{Na}]^+$  Calcd for  $\text{C}_{40}\text{H}_{64}\text{O}_4\text{Na}^+$  631.4697; Found 631.4703.

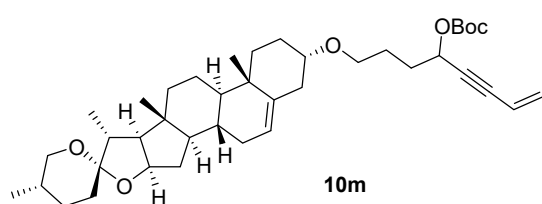

***tert*-Butyl (1-(((4*S*,5'*S*,6*aS*,6*bR*,8*aR*,8*bS*,9*R*,10*S*,11*aR*,12*aR*,12*bR*)-5',6*a*,8*a*,9-tetramethyl-1,3,3',4,4',5,5',6,6*a*,6*b*,6',7,8,8*a*,8*b*,9,11*a*,12,12*a*,12*b*-icosahydrospiro[naphtho[2',1':4,5]indeno[2,1-*b*]furan-10,2'-pyran]-4-yl)oxy)oct-7-en-5-yn-4-yl) carbonate (10m)**: eluent (petroleum ether/ethyl acetate = 25/1);

colourless oil; 56% yield;  $^1\text{H}$  NMR (400 MHz,  $\text{CDCl}_3$ ):  $\delta$  (ppm) 5.89–5.74 (m, 1H), 5.65 (dd,  $J = 17.6, 2.4$  Hz, 1H), 5.50 (dd,  $J = 10.8, 2.0$  Hz, 1H), 5.36–5.29 (m, 2H), 4.41 (q,  $J = 7.2$  Hz, 1H), 3.53–3.44 (m, 3H), 3.37 (t,  $J = 10.8$  Hz, 1H), 3.17–3.07 (m, 1H), 2.40–2.32 (m, 1H), 2.22–2.13 (m, 1H), 2.03–1.95 (m, 2H), 1.92–1.82 (m, 5H), 1.80–1.52 (m, 12H), 1.49 (s, 9H), 1.47–1.08 (m, 6H), 1.01 (s, 3H), 0.99–0.93 (m, 4H), 0.81–0.76 (m, 6H);  $^{13}\text{C}$  NMR (100 MHz,  $\text{CDCl}_3$ ):  $\delta$  (ppm) 152.7, 141.1, 127.9, 121.2, 116.5, 109.3, 86.7, 84.5, 82.6, 80.8, 79.0, 67.2, 66.9, 62.1, 56.5, 50.1, 41.6, 40.3, 39.8, 39.1, 37.2, 37.0, 32.1, 31.9, 31.8, 31.5, 31.4, 30.3, 28.8, 28.4, 27.8, 25.8, 20.9, 19.4, 17.1, 16.3, 14.5; HRMS (ESI-TOF)  $m/z$ :  $[\text{M} + \text{Na}]^+$  Calcd for  $\text{C}_{40}\text{H}_{60}\text{O}_6\text{Na}^+$  659.4282; Found 659.4283.

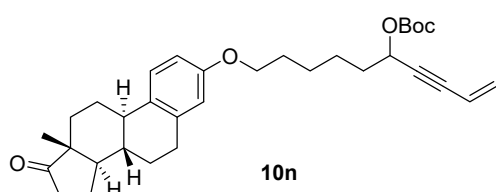

***tert*-Butyl (10-(((8*S*,9*R*,13*R*,14*R*)-13-methyl-17-oxo-7,8,9,11,12,13,14,15,16,17-decahydro-6*H*-cyclopenta[*a*]phenanthren-3-yl)oxy)dec-1-en-3-yn-5-yl) carbonate (10n)**: eluent (petroleum ether/ethyl acetate = 20/1);

colourless oil; 64% yield;  $^1\text{H}$  NMR (400 MHz,  $\text{CDCl}_3$ ):  $\delta$  (ppm) 7.19 (d,  $J = 8.4$  Hz, 1H), 6.73–6.67 (m, 1H), 6.66–6.60 (m, 1H), 5.80 (dd,  $J = 17.6, 11.2$  Hz, 1H), 5.65 (d,  $J = 17.6$  Hz, 1H), 5.50 (d,  $J = 11.2$  Hz, 1H), 5.30 (t,  $J = 6.4$  Hz, 1H), 3.93 (t,  $J = 6.4$  Hz, 2H), 2.94–2.84 (m, 2H), 2.54–2.46 (m,



1H), 2.44–2.36 (m, 1H), 2.29–2.21 (m, 1H), 2.17–1.93 (m, 4H), 1.87–1.75 (m, 4H), 1.64–1.51 (m, 8H), 1.50 (s, 9H), 1.47–1.39 (m, 2H), 0.91 (s, 3H); <sup>13</sup>C NMR (150 MHz, CDCl<sub>3</sub>): δ (ppm) 221.0, 157.1, 152.7, 137.7, 131.9, 127.9, 126.3, 116.5, 114.5, 112.1, 86.8, 84.5, 82.6, 67.6, 67.3, 50.4, 48.0, 44.0, 38.4, 35.9, 34.8, 31.6, 29.6, 29.1, 27.8, 26.6, 25.9, 25.7, 24.8, 21.6, 13.8; HRMS (ESI-TOF) *m/z*: [M + Na]<sup>+</sup> Calcd for C<sub>33</sub>H<sub>44</sub>O<sub>5</sub>Na<sup>+</sup> 543.3081; Found 543.3077.

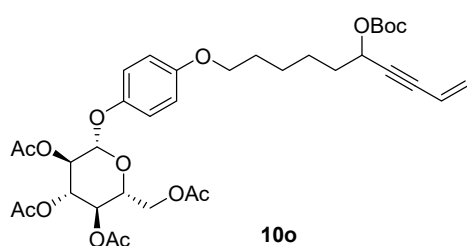

**10o**

**(2R,3R,4S,5R,6S)-2-(Acetoxymethyl)-6-(4-(((6-((tert-butyl oxycarbonyl)oxy)dec-9-en-7-yn-1-yl)oxy)phenoxy)tetrahydro-2H-pyran-3,4,5-triyl triacetate (10o):** eluent (petroleum ether/ethyl acetate = 20/1); colourless oil; 57% yield; <sup>1</sup>H NMR (600 MHz, CDCl<sub>3</sub>): δ (ppm) 6.92–6.90 (m,

2H), 6.79–6.77 (m, 2H), 5.84–5.75 (m, 1H), 5.63 (dd, *J* = 17.6, 2.4 Hz, 1H), 5.48 (dd, *J* = 10.8, 2.0 Hz, 1H), 5.29–5.20 (m, 3H), 5.16–5.12 (m, 1H), 4.93 (d, *J* = 7.8 Hz, 1H), 4.29–4.25 (m, 1H), 4.16–4.13 (m, 1H), 3.89 (t, *J* = 6.6 Hz, 2H), 3.80–3.77 (m, 1H), 2.06 (d, *J* = 6.0 Hz, 6H), 2.02 (d, *J* = 6.0 Hz, 6H), 1.85–1.81 (m, 2H), 1.78–1.74 (m, 2H), 1.54–1.49 (m, 4H), 1.47 (s, 9H); <sup>13</sup>C NMR (100 MHz, CDCl<sub>3</sub>): δ (ppm) 170.6, 170.3, 169.4, 169.3, 155.3, 152.7, 150.8, 128.0, 118.7, 116.4, 115.2, 100.3, 86.7, 84.5, 82.7, 72.7, 71.9, 71.2, 68.3, 68.2, 67.3, 61.9, 34.8, 29.1, 27.8, 25.6, 24.8, 20.8, 20.69, 20.65, 20.6; HRMS (ESI-TOF) *m/z*: [M + Na]<sup>+</sup> Calcd for C<sub>35</sub>H<sub>46</sub>O<sub>14</sub>Na<sup>+</sup> 713.2780; Found 713.2783.

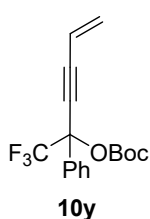

**10y**

**tert-Butyl (1,1,1-trifluoro-2-phenylhex-5-en-3-yn-2-yl) carbonate (10y):** eluent (petroleum ether/ethyl acetate = 70/1); colourless oil; 68% yield; <sup>1</sup>H NMR (400 MHz, CDCl<sub>3</sub>): δ (ppm) 7.69–7.64 (m, 2H), 7.44–7.40 (m, 3H), 6.02–5.91 (m, 1H), 5.91–5.85 (m, 1H), 5.71 (dd, *J* = 10.8, 2.8 Hz, 1H), 1.41 (s, 9H); <sup>13</sup>C NMR (100 MHz, CDCl<sub>3</sub>): δ (ppm) 149.3, 133.3, 130.4, 129.7, 128.4, 122.1 (q, <sup>1</sup>*J*<sub>FC</sub> = 282.7 Hz), 115.6, 88.4, 84.2, 81.1, 78.8 (q, <sup>2</sup>*J*<sub>FC</sub> = 32.2 Hz), 27.6; <sup>19</sup>F NMR (375 MHz, CDCl<sub>3</sub>): δ (ppm) –78.4; HRMS (ESI-TOF) *m/z*: [M + Na]<sup>+</sup> Calcd for C<sub>17</sub>H<sub>17</sub>F<sub>3</sub>O<sub>3</sub>Na<sup>+</sup> 349.1022; Found 349.1026.

## 2.2 Procedure for preparation of *ortho*-functionalised aryl enones<sup>2</sup>

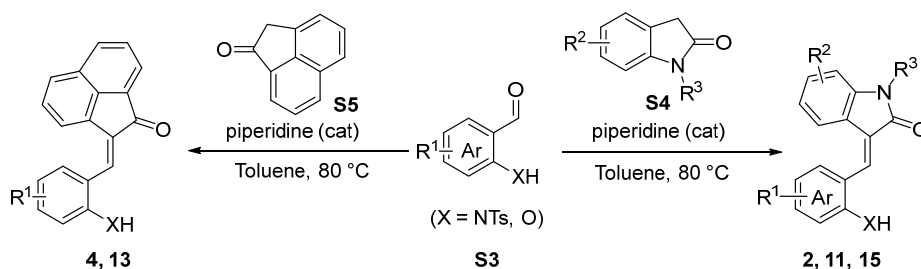

To a solution of **S3** (2.0 mmol) in toluene (10 mL) were added **S4** or **S5** (2.2 mmol) and piperidine (2–3 drops). The mixture was heated at 80 °C for 3–8 h, and monitored by TLC (petroleum ether/EtOAc = 5/1). After completion, the mixture was cooled to room temperature and the solid was collected by filtration and then dried in vacuum to give *ortho*-functionalised aryl enones **2**, **11** and **15**.

### Characterisation for selected *ortho*-functionalised aryl enones:

**2m**

Yellow solid, 71% yield; mp 233–235 °C; <sup>1</sup>H NMR (400 MHz, DMSO-*d*<sub>6</sub>): δ (ppm) 10.57 (s, 1H), 10.19 (s, 1H), 7.72 (s, 1H), 7.64 (d, *J* = 6.8 Hz, 1H), 7.52 (d, *J* = 7.6 Hz, 1H), 7.37–7.29 (m, 1H), 7.26–7.18 (m, 1H), 7.00 (d, *J* = 8.0 Hz, 1H), 6.96–6.91 (m, 1H), 6.91–6.80 (m, 2H); <sup>13</sup>C NMR (100 MHz, DMSO-*d*<sub>6</sub>): δ (ppm) 169.3, 157.0, 143.1, 133.0, 132.1, 130.2, 130.0, 127.0, 122.8, 121.82, 121.79, 121.5, 119.3, 116.5, 110.4; HRMS (ESI-TOF) *m/z*: [M + Na]<sup>+</sup> Calcd for C<sub>15</sub>H<sub>11</sub>NO<sub>2</sub>Na<sup>+</sup> 260.0682; Found 260.0682.

**11a**

Yellow solid, 75% yield; mp 247–249 °C; <sup>1</sup>H NMR (400 MHz, DMSO-*d*<sub>6</sub>): δ (ppm) 10.01 (s, 1H), 7.65 (s, 1H), 7.56 (d, *J* = 7.6 Hz, 1H), 7.48–7.43 (m, 1H), 7.42–7.37 (m, 2H), 7.37–7.27 (m, 3H), 7.05 (d, *J* = 7.6 Hz, 1H), 7.00 (d, *J* = 7.6 Hz, 1H), 6.95 (d, *J* = 8.0 Hz, 2H), 6.86–6.79 (m, 1H), 3.20 (s, 3H), 2.00 (s, 3H); <sup>13</sup>C NMR (100 MHz, DMSO-*d*<sub>6</sub>): δ (ppm) 167.2, 144.4, 143.3, 137.4, 135.7, 133.9, 131.8, 131.0, 130.4, 130.2, 129.8, 128.5, 128.1, 127.0, 126.9, 122.6, 121.9, 120.6, 109.1, 26.3, 21.2; HRMS (ESI-TOF) *m/z*: [M + Na]<sup>+</sup> Calcd for C<sub>23</sub>H<sub>20</sub>N<sub>2</sub>O<sub>3</sub>SN<sup>+</sup> 427.1087; Found 427.1089.

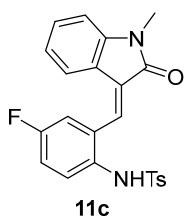

Yellow solid, 77% yield; mp 272–274 °C; <sup>1</sup>H NMR (400 MHz, DMSO-*d*<sub>6</sub>): δ (ppm) 9.97 (s, 1H), 7.53 (s, 1H), 7.42–7.25 (m, 6H), 7.01 (d, *J* = 8.0 Hz, 2H), 6.92 (d, *J* = 8.0 Hz, 2H), 6.89–6.81 (m, 1H), 3.20 (s, 3H), 1.98 (s, 3H); <sup>13</sup>C NMR (100 MHz, DMSO-*d*<sub>6</sub>): δ (ppm) 167.0, 160.5 (d, <sup>1</sup>*J*<sub>FC</sub> = 243.8 Hz), 144.5, 143.3, 137.1, 134.4 (d, <sup>3</sup>*J*<sub>FC</sub> = 8.7 Hz), 132.2, 131.9 (d, <sup>4</sup>*J*<sub>FC</sub> = 2.8 Hz), 131.5 (d, <sup>3</sup>*J*<sub>FC</sub> = 9.0 Hz), 130.7, 129.8, 128.9, 126.9, 122.7, 122.0, 120.2, 117.7 (d, <sup>1</sup>*J*<sub>FC</sub> = 22.3 Hz), 116.5 (d, <sup>2</sup>*J*<sub>FC</sub> = 23.2 Hz), 109.2, 26.4, 21.2; <sup>19</sup>F NMR (375 MHz, DMSO-*d*<sub>6</sub>): δ (ppm) –114.6; HRMS (ESI-TOF) *m/z*: [M + Na]<sup>+</sup> Calcd for C<sub>23</sub>H<sub>19</sub>FN<sub>2</sub>O<sub>3</sub>SNa<sup>+</sup> 445.0993; Found 445.0996.

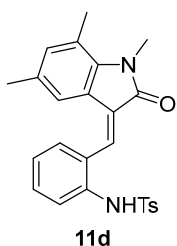

Yellow solid, 74% yield; mp 248–250 °C; <sup>1</sup>H NMR (400 MHz, DMSO-*d*<sub>6</sub>): δ (ppm) 9.99 (s, 1H), 7.59 (s, 1H), 7.51–7.46 (m, 1H), 7.46–7.37 (m, 3H), 7.35–7.26 (m, 2H), 6.99 (d, *J* = 7.6 Hz, 2H), 6.84 (s, 1H), 6.65 (s, 1H), 3.45 (s, 3H), 2.06 (s, 3H), 2.03 (s, 3H); <sup>13</sup>C NMR (100 MHz, DMSO-*d*<sub>6</sub>): δ (ppm) 168.0, 143.3, 140.0, 137.5, 135.6, 134.5, 133.4, 131.8, 130.8, 130.3, 130.1, 129.8, 128.2, 127.9, 127.0, 126.7, 121.32, 121.28, 119.9, 29.5, 21.2, 20.9, 18.9; HRMS (ESI-TOF) *m/z*: [M + Na]<sup>+</sup> Calcd for C<sub>25</sub>H<sub>24</sub>N<sub>2</sub>O<sub>3</sub>SNa<sup>+</sup> 455.1400; Found 455.1401.

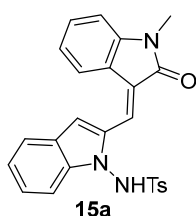

Yellow solid, 62% yield; mp 286–288 °C; <sup>1</sup>H NMR (400 MHz, DMSO-*d*<sub>6</sub>): δ (ppm) 11.70 (s, 1H), 7.93 (d, *J* = 7.6 Hz, 1H), 7.67 (d, *J* = 8.0 Hz, 1H), 7.47–7.32 (m, 4H), 7.32–7.25 (m, 1H), 7.22–7.11 (m, 3H), 7.10–6.99 (m, 2H), 6.88 (d, *J* = 8.0 Hz, 2H), 3.21 (s, 3H), 1.88 (s, 3H); <sup>13</sup>C NMR (100 MHz, DMSO-*d*<sub>6</sub>): δ (ppm) 167.4, 144.5, 144.2, 138.1, 134.6, 133.2, 130.5, 128.0, 125.5, 125.4, 125.1, 122.9, 122.7, 122.2, 121.90, 121.86, 120.6, 111.1, 109.0, 106.5, 26.4, 21.0; HRMS (ESI-TOF) *m/z*: [M + Na]<sup>+</sup> Calcd for C<sub>25</sub>H<sub>21</sub>N<sub>3</sub>O<sub>3</sub>SNa<sup>+</sup> 466.1196; Found 466.1195.

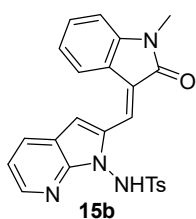

Yellow solid, 67% yield; mp 297–299 °C; <sup>1</sup>H NMR (400 MHz, DMSO-*d*<sub>6</sub>): δ (ppm) 11.72 (s, 1H), 8.45 (s, 1H), 8.29–8.22 (m, 1H), 8.16–8.09 (m, 1H), 7.59–7.48 (m, 2H), 7.39–7.31 (m, 2H), 7.25–7.12 (m, 4H), 7.11–7.05 (m, 1H), 7.03 (d, *J* = 8.0 Hz, 1H), 3.24 (s, 3H), 2.08 (s, 3H); <sup>13</sup>C NMR (100 MHz, DMSO-*d*<sub>6</sub>): δ (ppm) 165.4, 147.9, 146.8, 144.7, 142.4, 136.0, 133.3, 130.9, 130.3, 129.9, 128.0, 125.5, 123.3, 122.1, 120.5, 119.8, 118.7, 118.3, 109.0, 108.5, 26.4, 21.3; HRMS (ESI-TOF) *m/z*: [M + Na]<sup>+</sup> Calcd for C<sub>24</sub>H<sub>20</sub>N<sub>4</sub>O<sub>3</sub>SNa<sup>+</sup> 467.1148; Found 467.1152.

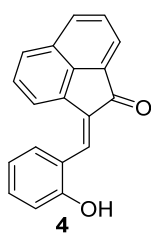

Yellow solid, 82% yield; mp 196–198 °C;  $^1\text{H}$  NMR (400 MHz,  $\text{DMSO-}d_6$ ):  $\delta$  (ppm) 10.27 (s, 1H), 8.28 (d,  $J = 8.4$  Hz, 1H), 8.07 (d,  $J = 6.8$  Hz, 1H), 8.01 (d,  $J = 8.0$  Hz, 1H), 7.93 (s, 1H), 7.89–7.82 (m, 2H), 7.79 (d,  $J = 6.8$  Hz, 1H), 7.68–7.60 (m, 1H), 7.44–7.34 (m, 1H), 7.07 (d,  $J = 8.4$  Hz, 1H), 7.04–6.97 (m, 1H);  $^{13}\text{C}$  NMR (100 MHz,  $\text{DMSO-}d_6$ ):  $\delta$  (ppm) 192.2, 157.3, 139.9, 132.7, 132.4, 132.2, 131.6, 130.8, 130.3, 128.9, 128.7, 126.4, 121.9, 121.8, 120.3, 119.3, 116.5; HRMS (ESI-TOF)  $m/z$ :  $[\text{M} + \text{H}]^+$  Calcd for  $\text{C}_{19}\text{H}_{13}\text{O}_2^+$  273.0910; Found 273.0911.

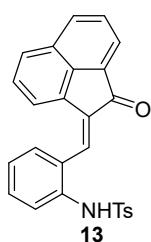

Yellow solid, 65% yield; mp 218–220 °C;  $^1\text{H}$  NMR (400 MHz,  $\text{DMSO-}d_6$ ):  $\delta$  (ppm) 10.04 (s, 1H), 8.29 (d,  $J = 8.0$  Hz, 1H), 8.10–7.97 (m, 2H), 7.91–7.83 (m, 1H), 7.74 (s, 1H), 7.71–7.65 (m, 1H), 7.59–7.49 (m, 2H), 7.45–7.38 (m, 2H), 7.38–7.23 (m, 3H), 6.68 (d,  $J = 7.6$  Hz, 2H), 1.39 (s, 3H);  $^{13}\text{C}$  NMR (100 MHz,  $\text{DMSO-}d_6$ ):  $\delta$  (ppm) 191.6, 142.9, 140.1, 137.3, 135.8, 134.6, 132.2, 131.99, 131.97, 131.90, 131.0, 130.8, 130.4, 129.6, 129.1, 128.8, 127.1, 126.9, 126.5, 121.8, 120.5, 20.4; HRMS (ESI-TOF)  $m/z$ :  $[\text{M} + \text{H}]^+$  Calcd for  $\text{C}_{26}\text{H}_{20}\text{NO}_3\text{S}^+$  426.1158; Found 426.1157.

### 2.3 Procedure for the preparation of substrate 8

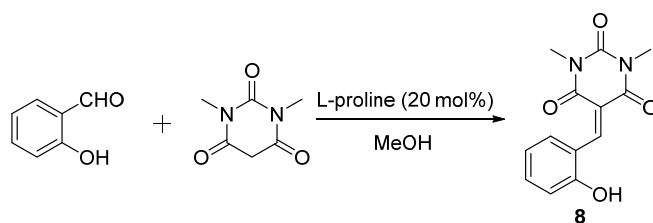

To a solution of salicylaldehyde (1.22 g, 10.0 mmol) in MeOH (30 mL) were added 1,3-dimethylbarbituric acid (1.72 g, 11.0 mmol) and L-proline (0.23 g, 2.0 mmol). The mixture was stirred at room temperature for 5 h, and monitored by TLC (petroleumether/EtOAc = 5/1). After completion, the solid was collected by filtration and then dried in vacuo to give product **8**: 1.85 g (7.11 mmol), as a yellow solid, 71% yield; mp 204–206 °C;  $^1\text{H}$  NMR (400 MHz,  $\text{DMSO-}d_6$ ):  $\delta$  (ppm) 10.59 (s, 1H), 8.67 (s, 1H), 8.10 (d,  $J = 8.8$  Hz, 1H), 7.41–7.34 (m, 1H), 6.94 (d,  $J = 8.0$  Hz, 1H), 6.86–6.80 (m, 1H), 3.23 (s, 3H), 3.18 (s, 3H);  $^{13}\text{C}$  NMR (100 MHz,  $\text{DMSO-}d_6$ ):  $\delta$  (ppm) 162.9, 160.9, 159.4, 151.8, 151.7, 135.1, 133.1, 120.5, 118.6, 117.4, 115.9, 29.0, 28.4; HRMS (ESI-TOF)  $m/z$ :  $[\text{M} + \text{H}]^+$  Calcd for  $\text{C}_{13}\text{H}_{13}\text{N}_2\text{O}_4^+$  261.0807; Found 261.0814.

Other substrates, including **2a–2l**, **6** and **10x** are known compounds, and the spectra of these compounds were consistent with the reports.<sup>1,3</sup>

## References

- (a) C. Li, Z. Zhou, Y. Li, Y. Guo and S. Ma, *Chem. Commun.* 2023, **59**, 3727–3730; (b) Z.-L. Wang and R. Zhu, *J. Am. Chem. Soc.* 2024, **146**, 19377–19385.
- S. Sambhaji Vagh, B.-J. Hou, A. Edukondalu, P.-C. Wang, Y.-R. Chen and W. Lin, *Adv. Synth. Catal.* 2021, **363**, 5429–5435.
- J. Sun, X. Liu, Q. Sun, Y. Han and C.-G. Yan, *J. Org. Chem.* 2023, **88**, 11562–11580.

## 3. Detailed condition optimisations

### 3.1 Detailed condition optimisations for asymmetric synthesis of **3a**<sup>a</sup>

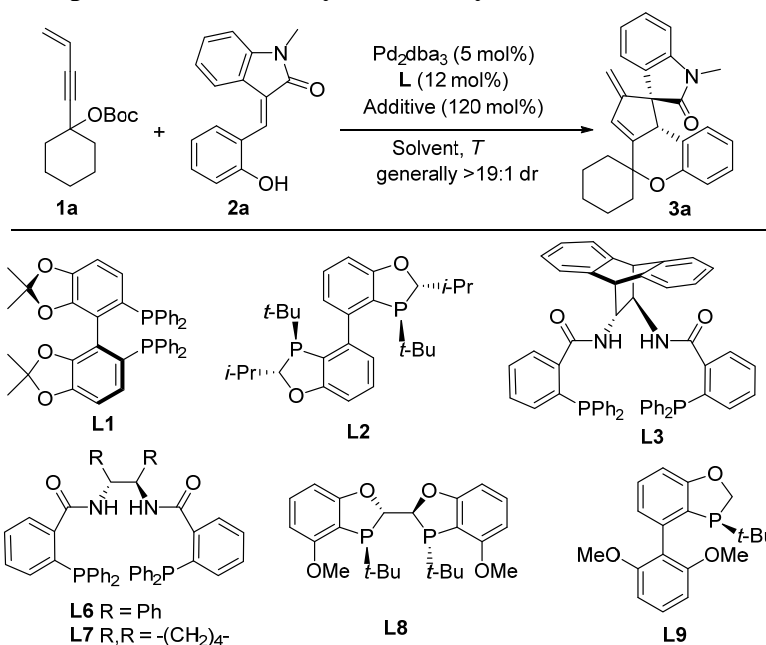

| Entry          | Ligand    | Solvent | $T$ ( $^{\circ}\text{C}$ ) | $t$ (h) | Additive | Yield (%) <sup>b</sup> | ee (%) <sup>c</sup> |
|----------------|-----------|---------|----------------------------|---------|----------|------------------------|---------------------|
| 1              | <b>L1</b> | MeCN    | 80                         | 24      | /        | 56                     | 29                  |
| 2              | <b>L2</b> | MeCN    | 80                         | 24      | /        | 33                     | 58                  |
| 3              | <b>L3</b> | MeCN    | 80                         | 24      | /        | 63                     | 74                  |
| 4              | <b>L6</b> | MeCN    | 80                         | 24      | /        | trace                  | /                   |
| 5              | <b>L7</b> | MeCN    | 80                         | 24      | /        | trace                  | /                   |
| 6              | <b>L8</b> | MeCN    | 80                         | 24      | /        | 40                     | 9                   |
| 7 <sup>d</sup> | <b>L9</b> | MeCN    | 80                         | 24      | /        | 48                     | 8                   |
| 8              | <b>L3</b> | MeCN    | 50                         | 48      | /        | 63                     | 85                  |
| 9              | <b>L3</b> | DCE     | 50                         | 48      | /        | 32                     | 78                  |
| 10             | <b>L3</b> | NMP     | 50                         | 48      | /        | 58                     | 87                  |
| 11             | <b>L3</b> | DMF     | 50                         | 48      | /        | 62                     | 85                  |

|                     |           |     |    |    |                                |       |    |
|---------------------|-----------|-----|----|----|--------------------------------|-------|----|
| 12                  | <b>L3</b> | DMA | 50 | 48 | /                              | 57    | 88 |
| 13 <sup>e</sup>     | <b>L3</b> | DMA | 50 | 48 | /                              | 60    | 88 |
| 14 <sup>e</sup>     | <b>L3</b> | DMA | 50 | 48 | KHCO <sub>3</sub>              | 73    | 89 |
| 15 <sup>e</sup>     | <b>L3</b> | DMA | 45 | 60 | KHCO <sub>3</sub>              | 64    | 91 |
| 16 <sup>e</sup>     | <b>L3</b> | DMA | 45 | 60 | K <sub>2</sub> CO <sub>3</sub> | 62    | 91 |
| 17 <sup>e</sup>     | <b>L3</b> | DMA | 45 | 60 | K <sub>3</sub> PO <sub>4</sub> | 61    | 91 |
| 18 <sup>e</sup>     | <b>L3</b> | DMA | 45 | 60 | Et <sub>3</sub> N              | trace | /  |
| 19 <sup>e</sup>     | <b>L3</b> | DMA | 45 | 60 | BzOH                           | trace | /  |
| 20 <sup>e,f</sup>   | <b>L3</b> | DMA | 45 | 60 | KHCO <sub>3</sub>              | 72    | 91 |
| 21 <sup>e,f,g</sup> | <b>L3</b> | DMA | 45 | 60 | KHCO <sub>3</sub>              | 48    | 91 |

<sup>a</sup> Unless noted otherwise, reactions were performed with 3-vinyl propargylic carbonate **1a** (0.1 mmol), (*E*)-3-(2-hydroxybenzylidene)oxindole **2a** (0.120 mmol), Pd<sub>2</sub>dba<sub>3</sub> (5 mol%), ligand **L** (12 mol%) in degassed solvent (1.0 mL) under Ar atmosphere. <sup>b</sup> Yield of the isolated product. <sup>c</sup> Determined by HPLC analysis on a chiral stationary phase, and >19:1 dr was determined by <sup>1</sup>H NMR analysis of crude product. <sup>d</sup> With **L9** (20 mol%). <sup>e</sup> With DMA (2.0 mL). <sup>f</sup> With **1a** (0.15 mmol) and **2a** (0.1 mmol). <sup>g</sup> With Pd<sub>2</sub>dba<sub>3</sub> (2.5 mol%), **L3** (6 mol%). NMP = *N*-methylpyrrolidin-2-one; DMF = Dimethylformamide; DMA = Dimethylacetamide.

### 3.2 Detailed condition optimisations for asymmetric synthesis of **7**<sup>a</sup>

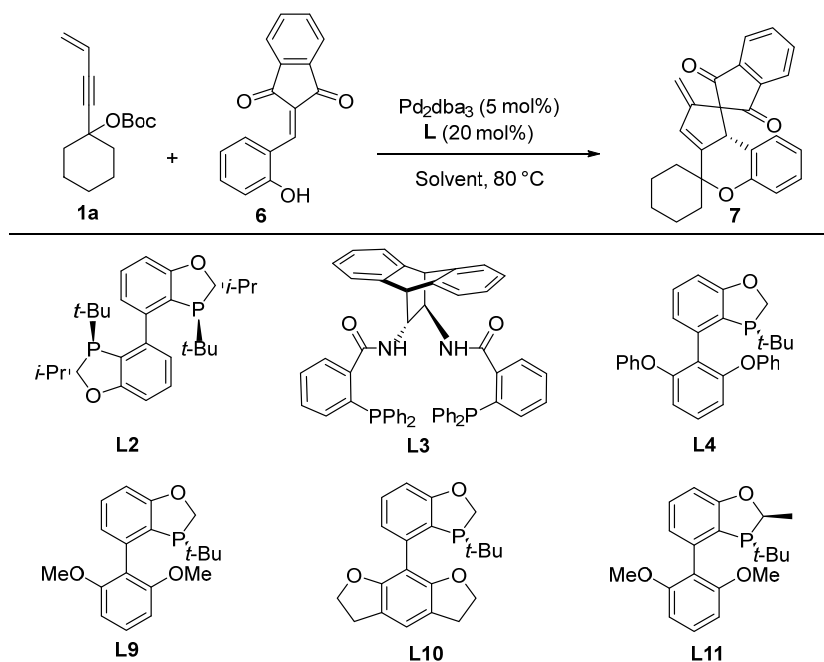

| Entry          | Ligand    | Solvent | <i>T</i> (° C) | <i>t</i> (h) | Yield (%) <sup>b</sup> | ee (%) <sup>c</sup> |
|----------------|-----------|---------|----------------|--------------|------------------------|---------------------|
| 1 <sup>d</sup> | <b>L2</b> | MeCN    | 80             | 24           | trace                  | /                   |
| 2 <sup>d</sup> | <b>L3</b> | MeCN    | 80             | 24           | trace                  | /                   |
| 3              | <b>L3</b> | toluene | 80             | 24           | trace                  | /                   |
| 4              | <b>L4</b> | MeCN    | 80             | 24           | trace                  | /                   |
| 5              | <b>L4</b> | toluene | 80             | 24           | 57                     | 51                  |

|    |            |         |    |    |       |    |
|----|------------|---------|----|----|-------|----|
| 6  | <b>L9</b>  | toluene | 80 | 24 | 65    | 3  |
| 7  | <b>L10</b> | toluene | 80 | 24 | 64    | 42 |
| 8  | <b>L11</b> | toluene | 80 | 24 | 63    | 10 |
| 9  | <b>L4</b>  | THF     | 80 | 24 | 53    | 48 |
| 10 | <b>L4</b>  | DMA     | 80 | 24 | trace | /  |
| 11 | <b>L4</b>  | DCE     | 80 | 24 | 46    | 49 |
| 12 | <b>L4</b>  | toluene | 60 | 36 | 35    | 52 |

<sup>a</sup> Unless noted otherwise, reactions were performed with 3-vinyl propargylic carbonate **1a** (0.15 mmol), 2-(2-hydroxybenzylidene)-1*H*-indene-1,3(2*H*)-dione **6** (0.1 mmol), Pd<sub>2</sub>dba<sub>3</sub> (5 mol%) and ligand **L** (20 mol%) in degassed solvent (1.0 mL) under Ar atmosphere. <sup>b</sup> Yield of the isolated product. <sup>c</sup> Determined by HPLC analysis on a chiral stationary phase, and >19:1 dr was determined by <sup>1</sup>H NMR analysis of crude product. <sup>d</sup> With ligand **L** (12 mol%).

### 3.3 Detailed condition optimisations for asymmetric synthesis of **12a**<sup>a</sup>

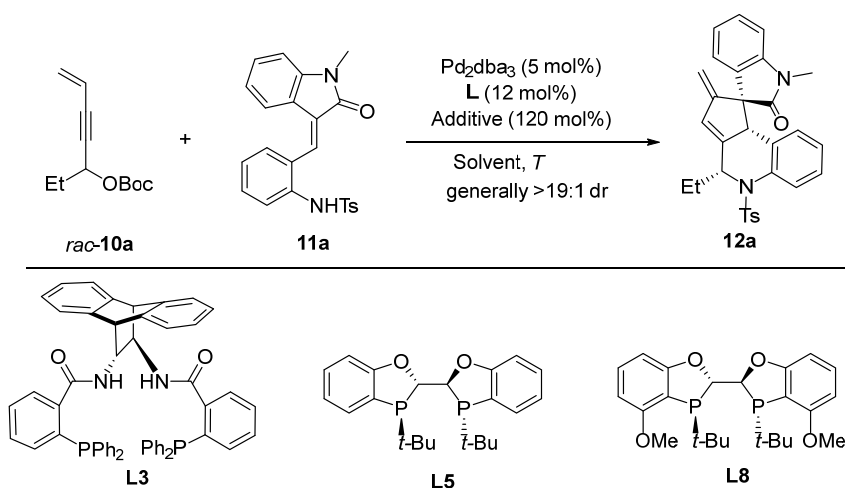

| Entry          | Ligand    | Solvent | <i>T</i> (°C) | <i>t</i> (h) | Additive                       | Yield (%) <sup>b</sup> | ee (%) <sup>c</sup> |
|----------------|-----------|---------|---------------|--------------|--------------------------------|------------------------|---------------------|
| 1              | <b>L3</b> | MeCN    | 60            | 36           | KHCO <sub>3</sub>              | 54                     | 36                  |
| 2              | <b>L5</b> | MeCN    | 60            | 36           | KHCO <sub>3</sub>              | 72                     | 83                  |
| 3              | <b>L8</b> | MeCN    | 60            | 36           | KHCO <sub>3</sub>              | 52                     | 85                  |
| 4              | <b>L5</b> | MeCN    | 50            | 48           | KHCO <sub>3</sub>              | 71                     | 85                  |
| 5              | <b>L5</b> | MeCN    | 45            | 72           | KHCO <sub>3</sub>              | 70                     | 93                  |
| 6              | <b>L5</b> | MeCN    | 40            | 72           | KHCO <sub>3</sub>              | low conv.              | /                   |
| 7              | <b>L5</b> | MeCN    | 45            | 72           | /                              | low conv.              | /                   |
| 8 <sup>d</sup> | <b>L5</b> | MeCN    | 45            | 72           | KHCO <sub>3</sub>              | 35                     | 92                  |
| 9 <sup>e</sup> | <b>L5</b> | MeCN    | 45            | 72           | KHCO <sub>3</sub>              | 71                     | 85                  |
| 10             | <b>L5</b> | MeCN    | 45            | 72           | K <sub>2</sub> CO <sub>3</sub> | low conv               | /                   |
| 11             | <b>L5</b> | toluene | 45            | 72           | KHCO <sub>3</sub>              | 38                     | 74                  |
| 12             | <b>L5</b> | THF     | 45            | 72           | KHCO <sub>3</sub>              | 71                     | 75                  |
| 13             | <b>L5</b> | DMA     | 45            | 72           | KHCO <sub>3</sub>              | low conv.              | /                   |

<sup>a</sup> Unless noted otherwise, reactions were performed with *tert*-butyl hept-6-en-4-yn-3-yl carbonate **10a** (0.2 mmol), (*E*)-4-methyl-*N*-(2-((1-methyl-2-oxoindolin-3-ylidene)methyl)phenyl)benzenesulfonamide **11a** (0.1 mmol), Pd<sub>2</sub>dba<sub>3</sub> (5 mol%), ligand **L** (12 mol%) in degassed solvent (1.0 mL) under Ar atmosphere. <sup>b</sup> Yield of the isolated product. <sup>c</sup> Determined by HPLC analysis on a chiral stationary phase, and >19:1 dr was determined by <sup>1</sup>H NMR analysis of crude product. <sup>d</sup> With MeCN (0.5 mL). <sup>e</sup> With MeCN (2.0 mL).

## 4. General procedure for the reactions of achiral 4-alken-2-ynyl carbonates

### 4.1 General procedure for synthesis of **3** and **5**

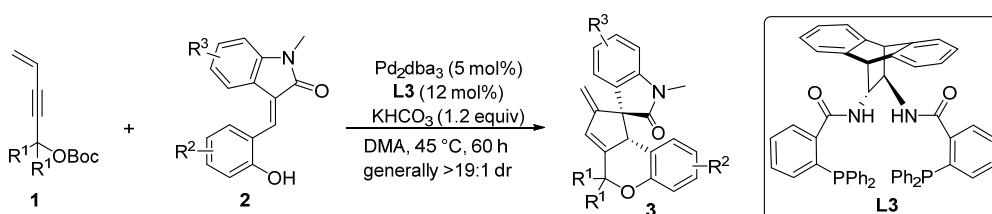

**General procedure:** To an oven-dried 10 mL Schlenk tube equipped with a magnetic stirring bar were added 4-alken-2-ynyl carbonate **1** (0.15 mmol, 1.5 equiv), activated alkene **2** (0.1 mmol, 1.0 equiv), Pd<sub>2</sub>dba<sub>3</sub> (4.6 mg, 0.0050 mmol, 5 mol%), **L3** (9.8 mg, 0.012 mmol, 12 mol%) and KHCO<sub>3</sub> (12.0 mg, 0.120 mmol, 1.2 equiv). The tube was capped, evacuated and back-filled with argon for five times. Then degassed dry DMA (2.0 mL) was added via syringe. The mixture was stirred at 45 °C for 60 h, and monitored by TLC (EtOAc/petroleum ether). After completion, the solvent was evaporated in vacuo. The residue was purified by flash chromatography on silica gel (EtOAc/petroleum ether) to give the product.

*Note: racemic 3 was prepared from 1 and 2 through the same procedure under the catalysis of Pd(PPh<sub>3</sub>)<sub>4</sub> (5 mol%).*

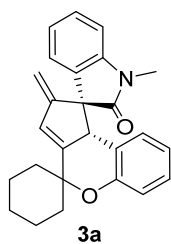

**Synthesis of 3a:** To an oven-dried 10 mL Schlenk tube equipped with a magnetic stirring bar were added 1-(but-3-en-1-yn-1-yl)cyclohexyl *tert*-butyl carbonate **1a** (37.6 mg, 0.150 mmol, 1.5 equiv), (*E*)-3-(2-hydroxybenzylidene)-1-methylindolin-2-one **2a** (25.1 mg, 0.0999 mmol, 1.0 equiv), Pd<sub>2</sub>dba<sub>3</sub> (4.6 mg, 0.0050 mmol, 5 mol%), **L3** (9.8 mg, 0.012 mmol, 12 mol%) and KHCO<sub>3</sub> (12.0 mg, 0.120 mmol, 1.2 equiv). The tube was capped, evacuated and back-filled with argon for five times. Then degassed dry DMA (2.0 mL) was added via syringe. The mixture was stirred at 45 °C for 60 h, and monitored by TLC (EtOAc/petroleum ether = 1/8). After completion, the solvent was evaporated in vacuo. The residue was purified by flash chromatography on silica gel (EtOAc/petroleum ether = 1/8) to give the product **3a**: 27.6 mg (0.0720 mmol), as a white solid, 72% yield; mp 157–159 °C; >19:1 dr, determined by <sup>1</sup>H



NMR analysis of crude product;  $[\alpha_D^{25}] = -58.3$  ( $c = 3.46$  in  $\text{CHCl}_3$ ); 91% ee, determined by HPLC analysis (Daicel Chiralpak AD,  $n$ -hexane/ $i$ -PrOH = 95/5, flow rate = 1.0 mL/min,  $\lambda = 254$  nm)  $t_R = 6.10$  min (minor),  $t_R = 7.36$  min (major);  $^1\text{H}$  NMR (400 MHz,  $\text{CDCl}_3$ ):  $\delta$  (ppm) 7.12–7.05 (m, 1H), 6.95–6.87 (m, 1H), 6.84–6.76 (m, 2H), 6.70–6.61 (m, 2H), 6.48–6.41 (m, 1H), 6.23 (d,  $J = 2.8$  Hz, 1H), 6.17 (d,  $J = 7.6$  Hz, 1H), 4.96 (s, 1H), 4.76 (s, 1H), 4.55 (s, 1H), 3.40 (s, 3H), 2.15–2.05 (m, 1H), 2.04–1.93 (m, 3H), 1.81–1.67 (m, 2H), 1.59–1.32 (m, 4H);  $^{13}\text{C}$  NMR (100 MHz,  $\text{CDCl}_3$ ):  $\delta$  (ppm) 178.7, 155.8, 152.9, 152.5, 142.6, 132.5, 127.74, 127.68, 127.6, 124.5, 122.9, 122.7, 121.8, 120.4, 117.5, 108.0, 105.3, 76.1, 62.9, 49.9, 34.4, 32.5, 26.8, 25.6, 21.7, 21.3; HRMS (ESI-TOF)  $m/z$ :  $[\text{M} + \text{Na}]^+$  Calcd for  $\text{C}_{26}\text{H}_{25}\text{NO}_2\text{Na}^+$  406.1778; Found 406.1777.

### Asymmetric synthesis of **3a** on a 1.0 mmol scale

To an oven-dried 50 mL Schlenk tube equipped with a magnetic stirring bar were added 1-(but-3-en-1-yn-1-yl)cyclohexyl *tert*-butyl carbonate **1a** (375.5 mg, 1.500 mmol), (*E*)-3-(2-hydroxybenzylidene)-1-methylindolin-2-one **2a** (251.3 mg, 1.000 mmol),  $\text{Pd}_2\text{dba}_3$  (45.8 mg, 0.0500 mmol, 5 mol%), **L3** (97.5 mg, 0.120 mmol, 12 mol%) and  $\text{KHCO}_3$  (120.2 mg, 1.201 mmol). The tube was capped, evacuated and back-filled with argon for five times. Then degassed dry DMA (20 mL) was added via syringe. The mixture was stirred at 45 °C for 60 h, and monitored by TLC (EtOAc/petroleum ether = 1/8). After completion, the solvent was evaporated in vacuo. The residue was purified by flash chromatography on silica gel (EtOAc/petroleum ether = 1/8) to give the product **3a**: 268.5 mg (0.7001 mmol), as a white solid, 70% yield, >19:1 dr, 91% ee.

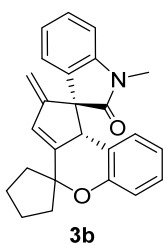

**Synthesis of 3b:** To an oven-dried 10 mL Schlenk tube equipped with a magnetic stirring bar were added 1-(but-3-en-1-yn-1-yl)cyclopentyl *tert*-butyl carbonate **1b** (35.5 mg, 0.150 mmol, 1.5 equiv), (*E*)-3-(2-hydroxybenzylidene)-1-methylindolin-2-one **2a** (25.1 mg, 0.0999 mmol, 1.0 equiv),  $\text{Pd}_2\text{dba}_3$  (4.6 mg, 0.0050 mmol, 5 mol%), **L3** (9.8 mg, 0.012 mmol, 12 mol%) and  $\text{KHCO}_3$  (12.0 mg, 0.120 mmol, 1.2 equiv).

The tube was capped, evacuated and back-filled with argon for five times. Then degassed dry DMA (2.0 mL) was added via syringe. The mixture was stirred at 45 °C for 60 h, and monitored by TLC (EtOAc/petroleum ether = 1/8). After completion, the solvent was evaporated in vacuo. The residue was purified by flash chromatography on silica gel (EtOAc/petroleum ether = 1/8) to give the product **3b**: 28.1 mg (0.0761 mmol), as a white solid, 76% yield; mp 146–148 °C; >19:1 dr, determined by  $^1\text{H}$

NMR analysis of crude product;  $[\alpha_D^{25}] = -77.6$  ( $c = 5.28$  in  $\text{CHCl}_3$ ); 95% ee, determined by HPLC analysis (Daicel Chiralpak AD,  $n$ -hexane/ $i$ -PrOH = 95/5, flow rate = 1.0 mL/min,  $\lambda = 254$  nm)  $t_R = 7.61$  min (minor),  $t_R = 9.69$  min (major);  $^1\text{H}$  NMR (400 MHz,  $\text{CDCl}_3$ ):  $\delta$  (ppm) 7.13–7.05 (m, 1H), 6.93–6.86 (m, 1H), 6.81 (d,  $J = 8.0$  Hz, 1H), 6.75–6.70 (m, 1H), 6.70–6.62 (m, 2H), 6.48–6.41 (m, 1H), 6.23 (d,  $J = 2.8$  Hz, 1H), 6.16 (d,  $J = 8.0$  Hz, 1H), 4.96 (s, 1H), 4.77 (s, 1H), 4.55 (s, 1H), 3.40 (s, 3H), 2.29–2.14 (m, 2H), 2.11–1.99 (m, 2H), 1.91–1.72 (m, 4H);  $^{13}\text{C}$  NMR (100 MHz,  $\text{CDCl}_3$ ):  $\delta$  (ppm) 178.7, 155.7, 153.5, 150.5, 142.6, 132.4, 127.8, 127.6, 123.6, 123.0, 122.7, 121.8, 120.4, 117.6, 108.0, 105.5, 86.3, 63.1, 50.7, 36.4, 36.0, 26.8, 23.8, 23.6; HRMS (ESI-TOF)  $m/z$ :  $[\text{M} + \text{Na}]^+$  Calcd for  $\text{C}_{25}\text{H}_{23}\text{NO}_2\text{Na}^+$  392.1621; Found 392.1623.

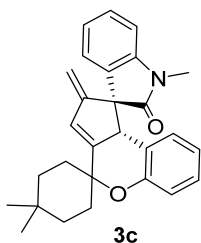

**Synthesis of 3c:** To an oven-dried 10 mL Schlenk tube equipped with a magnetic stirring bar were added 1-(but-3-en-1-yn-1-yl)-4,4-dimethylcyclohexyl *tert*-butyl carbonate **1c** (41.7 mg, 0.150 mmol, 1.5 equiv), (*E*)-3-(2-hydroxybenzylidene)-1-methylindolin-2-one **2a** (25.1 mg, 0.0999 mmol, 1.0 equiv),  $\text{Pd}_2\text{dba}_3$  (4.6 mg, 0.0050 mmol, 5 mol%), **L3** (9.8 mg, 0.012 mmol, 12 mol%) and  $\text{KHCO}_3$  (12.0 mg,

0.120 mmol, 1.2 equiv). The tube was capped, evacuated and back-filled with argon for five times. Then degassed dry DMA (2.0 mL) was added via syringe. The mixture was stirred at 45 °C for 60 h, and monitored by TLC (EtOAc/petroleum ether = 1/7). After completion, the solvent was evaporated in vacuo. The residue was purified by flash chromatography on silica gel (EtOAc/petroleum ether = 1/7) to give the product **3c**: 24.7 mg (0.0600 mmol), as a white solid, 60% yield; mp 197–198 °C; >19:1 dr, determined by  $^1\text{H}$  NMR analysis of crude product;  $[\alpha_D^{25}] = -31.5$  ( $c = 6.32$  in  $\text{CHCl}_3$ ); 56% ee, determined by HPLC analysis (Daicel Chiralpak IBN-5,  $n$ -hexane/ $i$ -PrOH = 95/5, flow rate = 1.0 mL/min,  $\lambda = 254$  nm)  $t_R = 6.87$  min (minor),  $t_R = 8.54$  min (major);  $^1\text{H}$  NMR (400 MHz,  $\text{CDCl}_3$ ):  $\delta$  (ppm) 7.12–7.02 (m, 1H), 6.95–6.87 (m, 1H), 6.84–6.73 (m, 2H), 6.70–6.57 (m, 2H), 6.48–6.41 (m, 1H), 6.25 (d,  $J = 2.8$  Hz, 1H), 6.16 (d,  $J = 7.6$  Hz, 1H), 4.96 (s, 1H), 4.76 (s, 1H), 4.55 (s, 1H), 3.39 (s, 3H), 2.18–2.08 (m, 1H), 2.06–1.99 (m, 1H), 1.96–1.80 (m, 2H), 1.68–1.58 (m, 1H), 1.55–1.40 (m, 2H), 1.20–1.13 (m, 1H), 1.01 (s, 3H), 0.97 (s, 3H);  $^{13}\text{C}$  NMR (100 MHz,  $\text{CDCl}_3$ ):  $\delta$  (ppm) 178.7, 155.8, 152.9, 152.3, 142.6, 132.4, 127.8, 127.7, 127.6, 124.4, 122.9, 122.7, 121.8, 120.4, 117.5, 108.0, 105.4, 75.9, 62.9, 50.0, 34.3, 34.0, 31.2, 30.5, 29.7, 28.6, 26.8, 25.2; HRMS (ESI-TOF)  $m/z$ :  $[\text{M} + \text{H}]^+$  Calcd for  $\text{C}_{28}\text{H}_{30}\text{NO}_2^+$  412.2271; Found 412.2274.

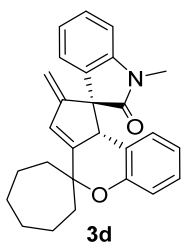

**Synthesis of 3d:** To an oven-dried 10 mL Schlenk tube equipped with a magnetic stirring bar were added 1-(but-3-en-1-yn-1-yl)cycloheptyl *tert*-butyl carbonate **1d** (39.7 mg, 0.150 mmol, 1.5 equiv), (*E*)-3-(2-hydroxybenzylidene)-1-methylindolin-2-one **2a** (25.1 mg, 0.0999 mmol, 1.0 equiv), Pd<sub>2</sub>dba<sub>3</sub> (4.6 mg, 0.0050 mmol, 5 mol%), **L3** (9.8 mg, 0.012 mmol, 12 mol%) and KHCO<sub>3</sub> (12.0 mg, 0.120 mmol, 1.2 equiv).

The tube was capped, evacuated and back-filled with argon for five times. Then degassed dry DMA (2.0 mL) was added via syringe. The mixture was stirred at 45 °C for 60 h, and monitored by TLC (EtOAc/petroleum ether = 1/7). After completion, the solvent was evaporated in vacuo. The residue was purified by flash chromatography on silica gel (EtOAc/petroleum ether = 1/7) to give the product **3d**: 25.1 mg (0.0631 mmol), as a white solid, 63% yield; mp 174–176 °C; >19:1 dr, determined by <sup>1</sup>H NMR analysis of crude product; [ $\alpha_D^{25}$ ] = -55.6 (*c* = 4.32 in CHCl<sub>3</sub>); 81% ee, determined by HPLC analysis (Daicel Chiralpak AD, *n*-hexane/*i*-PrOH = 90/10, flow rate = 1.0 mL/min,  $\lambda$  = 254 nm)  $t_R$  = 6.26 min (minor),  $t_R$  = 7.18 min (major); <sup>1</sup>H NMR (400 MHz, CDCl<sub>3</sub>):  $\delta$  (ppm) 7.13–7.04 (m, 1H), 6.94–6.85 (m, 1H), 6.80 (d, *J* = 8.0 Hz, 1H), 6.78–6.71 (m, 1H), 6.70–6.57 (m, 2H), 6.48–6.39 (m, 1H), 6.24 (d, *J* = 2.8 Hz, 1H), 6.15 (d, *J* = 7.6 Hz, 1H), 4.96 (s, 1H), 4.74 (s, 1H), 4.55 (s, 1H), 3.40 (s, 3H), 2.36–2.26 (m, 1H), 2.19–2.05 (m, 2H), 2.02–1.91 (m, 1H), 1.84–1.61 (m, 6H), 1.56–1.33 (m, 2H); <sup>13</sup>C NMR (100 MHz, CDCl<sub>3</sub>):  $\delta$  (ppm) 178.7, 155.7, 153.2, 153.0, 142.6, 132.5, 127.74, 127.67, 127.5, 124.4, 122.9, 122.7, 121.6, 120.2, 117.6, 108.0, 105.3, 80.7, 62.9, 49.8, 38.4, 35.3, 30.0, 29.8, 26.8, 22.4, 21.6; HRMS (ESI-TOF) *m/z*: [M + H]<sup>+</sup> Calcd for C<sub>27</sub>H<sub>28</sub>NO<sub>2</sub><sup>+</sup> 398.2115; Found 398.2111.

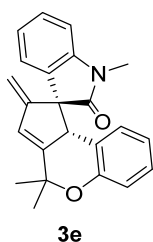

**Synthesis of 3e:** To an oven-dried 10 mL Schlenk tube equipped with a magnetic stirring bar were added *tert*-butyl (2-methylhex-5-en-3-yn-2-yl) carbonate **1e** (31.6 mg, 0.150 mmol, 1.5 equiv), (*E*)-3-(2-hydroxybenzylidene)-1-methylindolin-2-one **2a** (25.1 mg, 0.0999 mmol, 1.0 equiv), Pd<sub>2</sub>dba<sub>3</sub> (4.6 mg, 0.0050 mmol, 5 mol%), **L3** (9.8 mg, 0.012 mmol, 12 mol%) and KHCO<sub>3</sub> (12.0 mg, 0.120 mmol, 1.2 equiv).

The tube was capped, evacuated and back-filled with argon for five times. Then degassed dry DMA (2.0 mL) was added via syringe. The mixture was stirred at 45 °C for 60 h, and monitored by TLC (EtOAc/petroleum ether = 1/8). After completion, the solvent was evaporated in vacuo. The residue was purified by flash chromatography on silica gel (EtOAc/petroleum ether = 1/8) to give the product **3e**: 23.1 mg (0.0672

mmol), as a white solid, 67% yield; mp 135–137 °C; >19:1 dr, determined by <sup>1</sup>H NMR analysis of crude product; [ $\alpha_D^{25}$ ] = -96.5 (*c* = 7.23 in CHCl<sub>3</sub>); 92% ee, determined by HPLC analysis (Daicel Chiralpak AD, *n*-hexane/*i*-PrOH = 90/10, flow rate = 1.0 mL/min,  $\lambda$  = 254 nm)  $t_R$  = 5.07 min (minor),  $t_R$  = 6.70 min (major); <sup>1</sup>H NMR (400 MHz, CDCl<sub>3</sub>):  $\delta$  (ppm) 7.13–7.06 (m, 1H), 6.95–6.86 (m, 1H), 6.82 (d, *J* = 8.0 Hz, 1H), 6.76–6.70 (m, 1H), 6.70–6.64 (m, 1H), 6.64–6.56 (m, 1H), 6.47–6.40 (m, 1H), 6.23 (d, *J* = 2.8 Hz, 1H), 6.16 (d, *J* = 7.6 Hz, 1H), 4.97 (s, 1H), 4.78 (s, 1H), 4.56 (s, 1H), 3.40 (s, 3H), 1.74 (s, 3H), 1.48 (s, 3H); <sup>13</sup>C NMR (100 MHz, CDCl<sub>3</sub>):  $\delta$  (ppm) 178.6, 155.6, 153.2, 152.2, 142.6, 132.4, 127.8, 127.73, 127.70, 124.2, 122.9, 122.7, 121.0, 120.3, 117.4, 108.0, 105.5, 75.3, 63.0, 49.8, 26.8, 26.2, 24.9; HRMS (ESI-TOF) *m/z*: [M + H]<sup>+</sup> Calcd for C<sub>23</sub>H<sub>22</sub>NO<sub>2</sub><sup>+</sup> 344.1645; Found 344.1644.

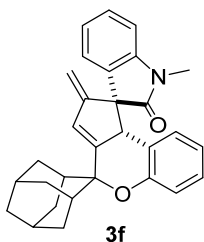

**Synthesis of 3f:** To an oven-dried 10 mL Schlenk tube equipped with a magnetic stirring bar were added 2-(but-3-en-1-yn-1-yl)adamantan-2-yl *tert*-butyl carbonate **1f** (45.4 mg, 0.150 mmol, 1.5 equiv), (*E*)-3-(2-hydroxybenzylidene)-1-methyl indolin-2-one **2a** (25.1 mg, 0.0999 mmol, 1.0 equiv), Pd(PPh<sub>3</sub>)<sub>4</sub> (5.8 mg, 0.0050 mmol, 5 mol%) and KHCO<sub>3</sub> (12.0 mg, 0.120 mmol, 1.2 equiv). The tube was

capped, evacuated and back-filled with argon for five times. Then degassed dry DMA (2.0 mL) was added via syringe. The mixture was stirred at 60 °C for 24 h, and monitored by TLC (EtOAc/petroleum ether = 1/6). After completion, the solvent was evaporated in vacuo. The residue was purified by flash chromatography on silica gel (EtOAc/petroleum ether = 1/6) to give the product **3f**: 25.7 mg (0.0590 mmol), as a white solid, 59% yield; mp 188–190 °C; >19:1 dr, determined by <sup>1</sup>H NMR analysis of crude product; <sup>1</sup>H NMR (400 MHz, CDCl<sub>3</sub>):  $\delta$  (ppm) 7.11–7.02 (m, 1H), 6.95–6.87 (m, 1H), 6.85–6.74 (m, 2H), 6.69–6.61 (m, 1H), 6.59–6.53 (m, 1H), 6.48–6.39 (m, 2H), 6.15 (d, *J* = 8.0 Hz, 1H), 4.96 (s, 1H), 4.70 (s, 1H), 4.50 (s, 1H), 3.38 (s, 3H), 2.66–2.57 (m, 1H), 2.46–2.40 (m, 1H), 2.35–2.27 (m, 1H), 2.25–2.17 (m, 1H), 2.10–2.00 (m, 1H), 2.00–1.88 (m, 3H), 1.85–1.69 (m, 5H), 1.50–1.38 (m, 1H); <sup>13</sup>C NMR (100 MHz, CDCl<sub>3</sub>):  $\delta$  (ppm) 178.9, 156.0, 152.7, 151.4, 142.6, 132.8, 127.74, 127.68, 127.63, 126.7, 123.4, 123.3, 122.6, 120.5, 117.6, 107.8, 105.3, 80.9, 62.5, 51.0, 37.5, 35.4, 34.8, 33.8, 32.6, 31.8, 31.6, 27.3, 27.1, 26.7; HRMS (ESI-TOF) *m/z*: [M + Na]<sup>+</sup> Calcd for C<sub>30</sub>H<sub>29</sub>NO<sub>2</sub>Na<sup>+</sup> 458.2091; Found 458.2101.

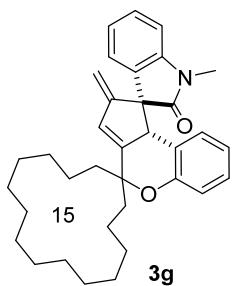

**Synthesis of 3g:** To an oven-dried 10 mL Schlenk tube equipped with a magnetic stirring bar were added 1-(but-3-en-1-yn-1-yl)cyclopentadecyl *tert*-butyl carbonate **1g** (55.2 mg, 0.150 mmol, 1.5 equiv), (*E*)-3-(2-hydroxybenzylidene)-1-methyl indolin-2-one **2a** (25.1 mg, 0.0999 mmol, 1.0 equiv), Pd(PPh<sub>3</sub>)<sub>4</sub> (5.8 mg, 0.0050 mmol, 5 mol%) and KHCO<sub>3</sub> (12.0 mg, 0.120 mmol, 1.2 equiv). The tube

was capped, evacuated and back-filled with argon for five times. Then degassed dry DMA (2.0 mL) was added via syringe. The mixture was stirred at 60 °C for 24 h, and monitored by TLC (EtOAc/petroleum ether = 1/9). After completion, the solvent was evaporated in vacuo. The residue was purified by flash chromatography on silica gel (EtOAc/petroleum ether = 1/9) to give the product **3g**: 33.7 mg (0.0661 mmol), as a white solid, 66% yield; mp 115–117 °C; dr = 10:1, determined by <sup>1</sup>H NMR analysis of crude product; <sup>1</sup>H NMR (400 MHz, CDCl<sub>3</sub>): δ (ppm) 7.10–7.05 (m, 1H), 6.92–6.87 (m, 1H), 6.80 (d, *J* = 8.0 Hz, 1H), 6.73 (d, *J* = 8.0 Hz, 1H), 6.68–6.61 (m, 2H), 6.45–6.39 (m, 1H), 6.26 (d, *J* = 2.8 Hz, 1H), 6.16 (d, *J* = 7.6 Hz, 1H), 4.96 (s, 1H), 4.69 (s, 1H), 4.55 (s, 1H), 3.39 (s, 3H), 2.06–1.72 (m, 4H), 1.52–1.25 (m, 24H); <sup>13</sup>C NMR (100 MHz, CDCl<sub>3</sub>): δ (ppm) 178.6, 155.6, 153.1, 151.7, 142.6, 132.4, 127.7, 127.7, 127.5, 125.7, 122.9, 122.7, 121.4, 120.2, 117.3, 108.0, 105.2, 80.1, 62.9, 49.8, 35.2, 32.4, 27.8, 27.5, 27.0, 26.9, 26.8, 26.7, 26.6, 26.4, 26.3, 21.8, 21.0; HRMS (ESI-TOF) *m/z*: [M + H]<sup>+</sup> Calcd for C<sub>35</sub>H<sub>44</sub>NO<sub>2</sub><sup>+</sup> 510.3367; Found 510.3368.

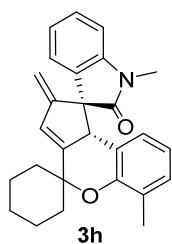

**Synthesis of 3h:** To an oven-dried 10 mL Schlenk tube equipped with a magnetic stirring bar were added 1-(but-3-en-1-yn-1-yl)cyclohexyl *tert*-butyl carbonate **1a** (37.6 mg, 0.150 mmol, 1.5 equiv), (*E*)-3-(2-hydroxy-3-methylbenzylidene)-1-methylindolin-2-one **2b** (26.5 mg, 0.0999 mmol, 1.0 equiv), Pd<sub>2</sub>dba<sub>3</sub> (4.6 mg, 0.0050 mmol, 5 mol%), **L3** (9.8 mg, 0.012 mmol, 12 mol%) and KHCO<sub>3</sub> (12.0 mg, 0.120

mmol, 1.2 equiv). The tube was capped, evacuated and back-filled with argon for five times. Then degassed dry DMA (2.0 mL) was added via syringe. The mixture was stirred at 45 °C for 60 h, and monitored by TLC (EtOAc/petroleum ether = 1/8). After completion, the solvent was evaporated in vacuo. The residue was purified by flash chromatography on silica gel (EtOAc/petroleum ether = 1/8) to give the product **3h**: 23.9 mg (0.0601 mmol), as a white solid, 60% yield; mp 151–153 °C; >19:1 dr, determined by <sup>1</sup>H NMR analysis of crude product; [α<sub>D</sub><sup>25</sup>] = +96.5 (*c* = 5.22 in CHCl<sub>3</sub>); 90% ee, determined by HPLC analysis (Daicel Chiralpak AD, *n*-hexane/*i*-PrOH = 90/10, flow rate = 1.0

mL/min,  $\lambda = 254$  nm)  $t_R = 5.09$  min (minor),  $t_R = 6.26$  min (major);  $^1\text{H NMR}$  (400 MHz,  $\text{CDCl}_3$ ):  $\delta$  (ppm)  $\delta$  7.14–7.03 (m, 1H), 6.84–6.73 (m, 2H), 6.71–6.57 (m, 2H), 6.34 (t,  $J = 7.2$  Hz, 1H), 6.20 (d,  $J = 2.8$  Hz, 1H), 6.01 (d,  $J = 7.6$  Hz, 1H), 4.94 (s, 1H), 4.76 (s, 1H), 4.53 (s, 1H), 3.39 (s, 3H), 2.21 (s, 3H), 2.19–2.12 (m, 1H), 2.05–1.91 (m, 3H), 1.85–1.68 (m, 2H), 1.60–1.25 (m, 4H);  $^{13}\text{C NMR}$  (100 MHz,  $\text{CDCl}_3$ ):  $\delta$  (ppm) 178.8, 155.9, 153.0, 151.0, 142.6, 132.6, 128.9, 127.7, 126.5, 125.1, 123.8, 122.9, 122.6, 121.1, 119.7, 108.0, 105.1, 75.9, 63.0, 50.0, 34.5, 32.5, 26.8, 25.7, 21.6, 16.3; HRMS (ESI-TOF)  $m/z$ :  $[\text{M} + \text{H}]^+$  Calcd for  $\text{C}_{27}\text{H}_{28}\text{NO}_2^+$  398.2115; Found 398.2114.

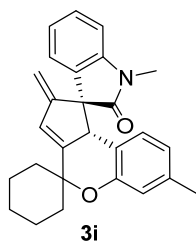

**Synthesis of 3i:** To an oven-dried 10 mL Schlenk tube equipped with a magnetic stirring bar were added 1-(but-3-en-1-yn-1-yl)cyclohexyl *tert*-butyl carbonate **1a** (37.6 mg, 0.150 mmol, 1.5 equiv), (*E*)-3-(2-hydroxy-4-methylbenzylidene)-1-methylindolin-2-one **2c** (26.5 mg, 0.0999 mmol, 1.0 equiv),  $\text{Pd}_2\text{dba}_3$  (4.6 mg, 0.0050 mmol, 5 mol%), **L3** (9.8 mg, 0.012 mmol, 12 mol%) and  $\text{KHCO}_3$  (12.0 mg, 0.120 mmol, 1.2 equiv).

The tube was capped, evacuated and back-filled with argon for five times. Then degassed dry DMA (2.0 mL) was added via syringe. The mixture was stirred at 45 °C for 60 h, and monitored by TLC (EtOAc/petroleum ether = 1/8). After completion, the solvent was evaporated in vacuo. The residue was purified by flash chromatography on silica gel (EtOAc/petroleum ether = 1/8) to give the product **3h**: 29.9 mg (0.0752 mmol), as a white solid, 75% yield; mp 155–157 °C; >19:1 dr, determined by  $^1\text{H NMR}$  analysis of crude product;  $[\alpha_D^{25}] = +84.3$  ( $c = 5.87$  in  $\text{CHCl}_3$ ); 90% ee, determined by HPLC analysis (Daicel Chiralpak AD, *n*-hexane/*i*-PrOH = 90/10, flow rate = 1.0 mL/min,  $\lambda = 254$  nm)  $t_R = 6.33$  min (minor),  $t_R = 8.62$  min (major);  $^1\text{H NMR}$  (400 MHz,  $\text{CDCl}_3$ ):  $\delta$  (ppm)  $\delta$  7.14–7.05 (m, 1H), 6.80 (d,  $J = 7.6$  Hz, 1H), 6.72–6.58 (m, 3H), 6.31–6.23 (m, 1H), 6.21 (d,  $J = 2.8$  Hz, 1H), 6.04 (d,  $J = 8.0$  Hz, 1H), 4.94 (s, 1H), 4.72 (s, 1H), 4.53 (s, 1H), 3.39 (s, 3H), 2.12 (s, 3H), 2.11–1.83 (m, 4H), 1.80–1.67 (m, 2H), 1.62–1.24 (m, 4H);  $^{13}\text{C NMR}$  (100 MHz,  $\text{CDCl}_3$ ):  $\delta$  (ppm) 178.8, 155.9, 152.8, 152.7, 142.6, 137.6, 132.5, 127.7, 127.3, 124.3, 123.0, 122.7, 121.4, 118.7, 117.9, 107.9, 105.2, 76.0, 62.9, 49.7, 34.4, 32.6, 26.7, 25.6, 21.7, 21.3, 21.1; HRMS (ESI-TOF)  $m/z$ :  $[\text{M} + \text{H}]^+$  Calcd for  $\text{C}_{27}\text{H}_{28}\text{NO}_2^+$  398.2115; Found 398.2111.

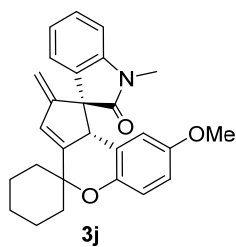

**Synthesis of 3j:** To an oven-dried 10 mL Schlenk tube equipped with a magnetic stirring bar were added 1-(but-3-en-1-yn-1-yl)cyclohexyl *tert*-butyl carbonate **1a** (37.6 mg, 0.150 mmol, 1.5 equiv), (*E*)-3-(2-hydroxy-5-methoxy benzylidene)-1-methylindolin-2-one **2d** (28.1 mg, 0.0999 mmol, 1.0 equiv), Pd<sub>2</sub>dba<sub>3</sub> (4.6 mg, 0.0050 mmol, 5 mol%), **L3** (9.8 mg, 0.012 mmol, 12 mol%) and KHCO<sub>3</sub> (12.0

mg, 0.120 mmol, 1.2 equiv). The tube was capped, evacuated and back-filled with argon for five times. Then degassed dry DMA (2.0 mL) was added via syringe. The mixture was stirred at 45 °C for 60 h, and monitored by TLC (EtOAc/petroleum ether = 1/8). After completion, the solvent was evaporated in vacuo. The residue was purified by flash chromatography on silica gel (EtOAc/petroleum ether = 1/8) to give the product **3j**: 29.8 mg (0.0721 mmol), as a white solid, 72% yield; mp 167–169 °C; >19:1 dr, determined by <sup>1</sup>H NMR analysis of crude product; [ $\alpha_D^{25}$ ] = +142.2 (*c* = 6.34 in CHCl<sub>3</sub>); 90% ee, determined by HPLC analysis (Daicel Chiralpak IA, *n*-hexane/*i*-PrOH = 90/10, flow rate = 1.0 mL/min,  $\lambda$  = 254 nm)  $t_R$  = 8.19 min (minor),  $t_R$  = 12.70 min (major); <sup>1</sup>H NMR (400 MHz, CDCl<sub>3</sub>):  $\delta$  (ppm) 7.1–7.07 (m, 1H), 6.81 (d, *J* = 7.6 Hz, 1H), 6.74–6.65 (m, 3H), 6.52–6.47 (m, 1H), 6.23 (d, *J* = 2.8 Hz, 1H), 5.71 (d, *J* = 3.4 Hz, 1H), 4.97 (s, 1H), 4.71 (s, 1H), 4.56 (s, 1H), 3.39 (s, 3H), 3.36 (s, 3H), 2.15–1.89 (m, 4H), 1.79–1.64 (m, 2H), 1.57–1.33 (m, 4H); <sup>13</sup>C NMR (100 MHz, CDCl<sub>3</sub>):  $\delta$  (ppm) 178.7, 155.6, 153.2, 152.6, 147.0, 142.6, 132.4, 127.9, 124.5, 123.0, 122.9, 122.3, 118.2, 114.8, 111.4, 107.9, 105.4, 75.9, 62.9, 55.4, 50.4, 34.4, 32.3, 26.8, 25.6, 21.7, 21.3; HRMS (ESI-TOF) *m/z*: [M + H]<sup>+</sup> Calcd for C<sub>27</sub>H<sub>28</sub>NO<sub>3</sub><sup>+</sup> 414.2064; Found 414.2069.

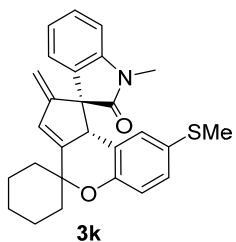

**Synthesis of 3k:** To an oven-dried 10 mL Schlenk tube equipped with a magnetic stirring bar were added 1-(but-3-en-1-yn-1-yl)cyclohexyl *tert*-butyl carbonate **1a** (37.6 mg, 0.150 mmol, 1.5 equiv), (*E*)-3-(2-hydroxy-5-(methylthio)benzylidene)-1-methylindolin-2-one **2e** (29.7 mg, 0.0999 mmol, 1.0 equiv), Pd<sub>2</sub>dba<sub>3</sub> (4.6 mg, 0.0050 mmol, 5 mol%), **L3** (9.8 mg, 0.012 mmol, 12 mol%)

and KHCO<sub>3</sub> (12.0 mg, 0.120 mmol, 1.2 equiv). The tube was capped, evacuated and back-filled with argon for five times. Then degassed dry DMA (2.0 mL) was added via syringe. The mixture was stirred at 45 °C for 60 h, and monitored by TLC (EtOAc/petroleum ether = 1/8). After completion, the solvent was evaporated in vacuo. The residue was purified by flash chromatography on silica gel (EtOAc/petroleum ether = 1/8) to give the product **3k**: 34.0 mg (0.0791 mmol), as a white solid, 79%

yield; mp 211–213 °C; >19:1 dr, determined by <sup>1</sup>H NMR analysis of crude product; [ $\alpha_D^{25}$ ] = –131.7 (*c* = 5.81 in CHCl<sub>3</sub>); 89% ee, determined by HPLC analysis (Daicel Chiralpak IB, *n*-hexane/*i*-PrOH = 95/5, flow rate = 1.0 mL/min,  $l$  = 254 nm)  $t_R$  = 6.27 min (minor),  $t_R$  = 7.28 min (major); <sup>1</sup>H NMR (400 MHz, CDCl<sub>3</sub>):  $\delta$  (ppm) 7.14–7.05 (m, 1H), 6.94–6.88 (m, 1H), 6.82 (d, *J* = 7.6 Hz, 1H), 6.73–6.65 (m, 2H), 6.63–6.58 (m, 1H), 6.25 (d, *J* = 2.8 Hz, 1H), 6.19–6.10 (m, 1H), 4.98 (s, 1H), 4.72 (s, 1H), 4.56 (s, 1H), 3.40 (s, 3H), 2.15–2.00 (m, 2H), 1.99 (s, 3H), 1.98–1.89 (m, 2H), 1.81–1.67 (m, 2H), 1.59–1.27 (m, 4H); <sup>13</sup>C NMR (100 MHz, CDCl<sub>3</sub>):  $\delta$  (ppm) 178.6, 155.4, 151.9, 151.7, 142.6, 132.3, 129.3, 128.6, 128.2, 127.9, 124.9, 123.1, 122.9, 122.6, 118.0, 108.0, 105.8, 76.4, 62.7, 50.0, 34.3, 32.6, 26.8, 25.6, 21.6, 21.3, 18.1; HRMS (ESI-TOF) *m/z*: [M + Na]<sup>+</sup> Calcd for C<sub>27</sub>H<sub>27</sub>NO<sub>2</sub>SNa<sup>+</sup> 452.1655; Found 452.1648.

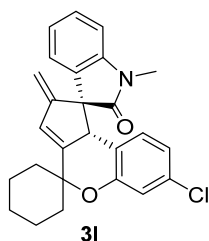

**Synthesis of 31:** To an oven-dried 10 mL Schlenk tube equipped with a magnetic stirring bar were added 1-(but-3-en-1-yn-1-yl)cyclohexyl *tert*-butyl carbonate **1a** (37.6 mg, 0.150 mmol, 1.5 equiv), (*E*)-3-(4-chloro-2-hydroxybenzylidene)-1-methylindolin-2-one **2f** (28.6 mg, 0.100 mmol, 1.0 equiv), Pd<sub>2</sub>dba<sub>3</sub> (4.6 mg, 0.0050 mmol, 5 mol%), **L3** (9.8 mg, 0.012 mmol, 12 mol%) and KHCO<sub>3</sub> (12.0 mg,

0.120 mmol, 1.2 equiv). The tube was capped, evacuated and back-filled with argon for five times. Then degassed dry DMA (2.0 mL) was added via syringe. The mixture was stirred at 45 °C for 60 h, and monitored by TLC (EtOAc/petroleum ether = 1/8). After completion, the solvent was evaporated in vacuo. The residue was purified by flash chromatography on silica gel (EtOAc/petroleum ether = 1/8) to give the product **31**: 30.6 mg (0.0732 mmol), as a white solid, 73% yield; mp 176–178 °C; >19:1 dr, determined by <sup>1</sup>H NMR analysis of crude product; [ $\alpha_D^{25}$ ] = –73.4 (*c* = 6.72 in CHCl<sub>3</sub>); 88% ee, determined by HPLC analysis (Daicel Chiralpak AD, *n*-hexane/*i*-PrOH = 90/10, flow rate = 1.0 mL/min,  $l$  = 254 nm)  $t_R$  = 5.75 min (minor),  $t_R$  = 6.88 min (major); <sup>1</sup>H NMR (400 MHz, CDCl<sub>3</sub>):  $\delta$  (ppm) 7.15–7.04 (m, 1H), 6.90–6.76 (m, 2H), 6.74–6.66 (m, 1H), 6.64–6.58 (m, 1H), 6.48–6.37 (m, 1H), 6.24 (d, *J* = 2.8 Hz, 1H), 6.07 (d, *J* = 8.4 Hz, 1H), 4.97 (s, 1H), 4.70 (s, 1H), 4.55 (s, 1H), 3.39 (s, 3H), 2.18–2.05 (m, 1H), 2.04–1.90 (m, 3H), 1.81–1.67 (m, 2H), 1.58–1.29 (m, 4H); <sup>13</sup>C NMR (100 MHz, CDCl<sub>3</sub>):  $\delta$  (ppm) 178.5, 155.5, 153.7, 151.5, 142.5, 132.7, 132.1, 128.5, 128.0, 124.9, 122.93, 122.91, 120.6, 120.4, 117.8, 108.1, 105.8, 62.7, 49.4, 34.3, 32.6, 26.8, 25.5, 21.6, 21.3; HRMS (ESI-TOF) *m/z*: C<sub>26</sub>H<sub>24</sub><sup>35</sup>ClNO<sub>2</sub>Na<sup>+</sup> 440.1388; Found 440.1398; [M + Na]<sup>+</sup> Calcd for C<sub>26</sub>H<sub>24</sub><sup>37</sup>ClNO<sub>2</sub>Na<sup>+</sup>



442.1358; Found 442.1350.

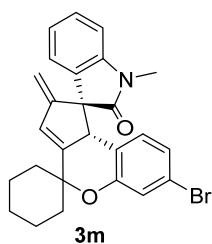

**Synthesis of 3m:** To an oven-dried 10 mL Schlenk tube equipped with a magnetic stirring bar were added 1-(but-3-en-1-yn-1-yl)cyclohexyl *tert*-butyl carbonate **1a** (37.6 mg, 0.150 mmol, 1.5 equiv), (*E*)-3-(4-bromo-2-hydroxybenzylidene)-1-methylindolin-2-one **2g** (33.0 mg, 0.0999 mmol, 1.0 equiv), Pd<sub>2</sub>dba<sub>3</sub> (4.6 mg, 0.0050 mmol, 5 mol%), **L3** (9.8 mg, 0.012 mmol, 12 mol%) and KHCO<sub>3</sub> (12.0 mg, 0.120 mmol, 1.2 equiv). The tube was capped, evacuated and back-filled with argon for five times. Then degassed dry DMA (2.0 mL) was added via syringe. The mixture was stirred at 45 °C for 60 h, and monitored by TLC (EtOAc/petroleum ether = 1/8). After completion, the solvent was evaporated in vacuo. The residue was purified by flash chromatography on silica gel (EtOAc/petroleum ether = 1/8) to give the product **3m**: 33.9 mg (0.0733 mmol), as a white solid, 73% yield; mp 144–146 °C; >19:1 dr, determined by <sup>1</sup>H NMR analysis of crude product; [α<sub>D</sub><sup>25</sup>] = -174.8 (*c* = 8.32 in CHCl<sub>3</sub>); 85% ee, determined by HPLC analysis (Daicel Chiralpak AD, *n*-hexane/*i*-PrOH = 90/10, flow rate = 1.0 mL/min, λ = 254 nm) t<sub>R</sub> = 6.19 min (minor), t<sub>R</sub> = 8.25 min (major); <sup>1</sup>H NMR (400 MHz, CDCl<sub>3</sub>): δ (ppm) 7.16–7.08 (m, 1H), 6.98 (d, *J* = 2.0 Hz, 1H), 6.82 (d, *J* = 8.0 Hz, 1H), 6.74–6.68 (m, 1H), 6.63–6.59 (m, 1H), 6.59–6.54 (m, 1H), 6.24 (d, *J* = 2.8 Hz, 1H), 6.01 (d, *J* = 8.4 Hz, 1H), 4.97 (s, 1H), 4.68 (s, 1H), 4.55 (s, 1H), 3.39 (s, 3H), 2.13–2.06 (m, 1H), 2.03–1.90 (m, 3H), 1.78–1.68 (m, 2H), 1.61–1.35 (m, 4H); <sup>13</sup>C NMR (100 MHz, CDCl<sub>3</sub>): δ (ppm) 178.5, 155.5, 153.8, 151.4, 142.5, 132.1, 128.8, 128.0, 124.9, 123.5, 123.0, 122.9, 120.9, 120.7, 120.5, 108.1, 105.8, 62.6, 49.4, 34.3, 32.7, 26.8, 25.5, 21.4, 21.3; HRMS (ESI-TOF) *m/z*: [M + H]<sup>+</sup> Calcd for C<sub>26</sub>H<sub>25</sub><sup>79</sup>BrNO<sub>2</sub><sup>+</sup> 462.1063; Found 462.1060; Calcd for C<sub>26</sub>H<sub>25</sub><sup>81</sup>BrNO<sub>2</sub><sup>+</sup> 464.1043; Found 464.1046.

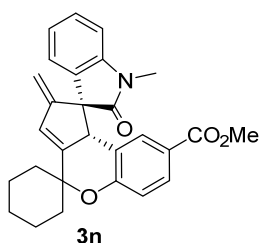

**Synthesis of 3n:** To an oven-dried 10 mL Schlenk tube equipped with a magnetic stirring bar were added 1-(but-3-en-1-yn-1-yl)cyclohexyl *tert*-butyl carbonate **1a** (37.6 mg, 0.150 mmol, 1.5 equiv), methyl (*E*)-4-hydroxy -3-((1-methyl-2-oxoindolin-3-ylidene)methyl)benzoate **2h** (30.9 mg, 0.0999 mmol, 1.0 equiv), Pd<sub>2</sub>dba<sub>3</sub> (4.6 mg, 0.0050 mmol, 5 mol%), **L3** (9.8 mg, 0.012 mmol, 12 mol%) and KHCO<sub>3</sub> (12.0 mg, 0.120 mmol, 1.2 equiv). The tube was capped, evacuated and back-filled with argon for five times. Then degassed dry DMA (2.0 mL) was added via syringe. The mixture was stirred at 45 °C for 60 h, and monitored by TLC (EtOAc/petroleum ether = 1/6). After completion,

the solvent was evaporated in vacuo. The residue was purified by flash chromatography on silica gel (EtOAc/petroleum ether = 1/6) to give the product **3n**: 23.5 mg (0.0532 mmol), as a white solid, 53% yield; mp 211–213 °C; >19:1 dr, determined by <sup>1</sup>H NMR analysis of crude product; [ $\alpha_D^{25}$ ] = +82.6 (*c* = 4.25 in CHCl<sub>3</sub>); 91% ee, determined by HPLC analysis (Daicel Chiralpak IB, *n*-hexane/*i*-PrOH = 90/10, flow rate = 1.0 mL/min,  $\lambda$  = 254 nm)  $t_R$  = 6.85 min (minor),  $t_R$  = 8.02 min (major); <sup>1</sup>H NMR (400 MHz, CDCl<sub>3</sub>):  $\delta$  (ppm) 7.58 (d, *J* = 8.4 Hz, 1H), 7.07–7.03 (m, 1H), 6.93 (s, 1H), 6.85–6.76 (m, 2H), 6.67–6.55 (m, 2H), 6.29 (d, *J* = 2.0 Hz, 1H), 5.02 (s, 1H), 4.75 (s, 1H), 4.62 (s, 1H), 3.71 (s, 3H), 3.43 (s, 3H), 2.16–2.07 (m, 1H), 2.07–1.93 (m, 3H), 1.80–1.69 (m, 2H), 1.60–1.30 (m, 4H); <sup>13</sup>C NMR (100 MHz, CDCl<sub>3</sub>):  $\delta$  (ppm) 178.3, 166.3, 157.0, 154.9, 150.9, 142.7, 132.0, 130.0, 129.4, 128.1, 125.4, 122.7, 122.5, 122.0, 121.4, 117.3, 108.2, 106.3, 63.0, 51.6, 50.0, 34.2, 32.9, 26.8, 25.5, 21.6, 21.3; HRMS (ESI-TOF) *m/z*: [M + Na]<sup>+</sup> Calcd for C<sub>28</sub>H<sub>27</sub>NO<sub>4</sub>Na<sup>+</sup> 464.1832; Found 464.1836.

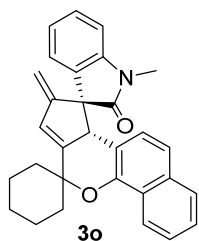

**Synthesis of 3o:** To an oven-dried 10 mL Schlenk tube equipped with a magnetic stirring bar were added 1-(but-3-en-1-yn-1-yl)cyclohexyl *tert*-butyl carbonate **1a** (37.6 mg, 0.150 mmol, 1.5 equiv), (*E*)-3-((1-hydroxynaphthalen-2-yl)methylene)-1-methyl indolin-2-one **2i** (30.1 mg, 0.0999 mmol, 1.0 equiv), Pd<sub>2</sub>dba<sub>3</sub> (4.6 mg, 0.0050 mmol, 5 mol%), **L3** (9.8 mg, 0.012 mmol, 12 mol%) and KHCO<sub>3</sub> (12.0 mg, 0.120 mmol, 1.2 equiv). The tube was capped, evacuated and back-filled with argon for five times. Then degassed dry

DMA (2.0 mL) was added via syringe. The mixture was stirred at 45 °C for 60 h, and monitored by TLC (EtOAc/petroleum ether = 1/7). After completion, the solvent was evaporated in vacuo. The residue was purified by flash chromatography on silica gel (EtOAc/petroleum ether = 1/7) to give the product **3o**: 26.5 mg (0.0611 mmol), as a white solid, 61% yield; mp 193–195 °C; >19:1 dr, determined by <sup>1</sup>H NMR analysis of crude product; [ $\alpha_D^{25}$ ] = –212.6 (*c* = 7.32 in CHCl<sub>3</sub>); 97% ee, determined by HPLC analysis (Daicel Chiralpak IF, *n*-hexane/*i*-PrOH = 90/10, flow rate = 1.0 mL/min,  $\lambda$  = 254 nm)  $t_R$  = 9.75 min (minor),  $t_R$  = 13.43 min (major); <sup>1</sup>H NMR (400 MHz, CDCl<sub>3</sub>):  $\delta$  (ppm) 7.49–7.44 (m, 1H), 7.42 (d, *J* = 8.8 Hz, 1H), 7.35 (d, *J* = 8.4 Hz, 1H), 7.19–7.11 (m, 1H), 7.11–7.05 (m, 1H), 7.01 (d, *J* = 8.8 Hz, 1H), 6.81–6.70 (m, 1H), 6.56–6.45 (m, 1H), 6.44–6.36 (m, 2H), 6.34 (d, *J* = 2.8 Hz, 1H), 5.17 (s, 1H), 4.96 (s, 1H), 4.56 (s, 1H), 3.27 (s, 3H), 2.26–2.14 (m, 1H), 2.14–1.96 (m, 3H), 1.86–1.65 (m, 2H), 1.62–1.35 (m, 4H); <sup>13</sup>C NMR (100 MHz, CDCl<sub>3</sub>):  $\delta$  (ppm) 179.7, 156.0, 153.4, 151.8, 142.2, 132.9, 131.9, 128.9, 128.6, 128.0, 127.3, 125.1, 125.0, 122.9, 122.8, 122.0, 121.9, 119.2,

114.9, 107.6, 105.2, 63.7, 48.6, 34.4, 30.7, 26.9, 25.7, 22.0, 21.5; HRMS (ESI-TOF)  $m/z$ :  $[M + H]^+$   
Calcd for  $C_{30}H_{28}NO_2^+$  434.2115; Found 434.2113.

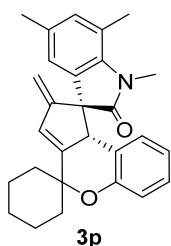

**Synthesis of 3p:** To an oven-dried 10 mL Schlenk tube equipped with a magnetic stirring bar were added 1-(but-3-en-1-yn-1-yl)cyclohexyl *tert*-butyl carbonate **1a** (37.6 mg, 0.150 mmol, 1.5 equiv), (*E*)-3-(2-hydroxybenzylidene)-1,5,7-trimethyl indolin-2-one **2j** (27.9 mg, 0.0999 mmol, 1.0 equiv), Pd<sub>2</sub>dba<sub>3</sub> (4.6 mg, 0.0050 mmol, 5 mol%), **L3** (9.8 mg, 0.012 mmol, 12 mol%) and KHCO<sub>3</sub> (12.0 mg, 0.120 mmol, 1.2 equiv). The tube was capped, evacuated and back-filled with argon for five times. Then degassed dry DMA (2.0 mL) was added via syringe. The mixture was stirred at 45 °C for 60 h, and monitored by TLC (EtOAc/petroleum ether = 1/7). After completion, the solvent was evaporated in vacuo. The residue was purified by flash chromatography on silica gel (EtOAc/petroleum ether = 1/7) to give the product **3p**: 29.4 mg (0.0714 mmol), as a white solid, 71% yield; mp 167–168 °C; >19:1 dr, determined by <sup>1</sup>H NMR analysis of crude product;  $[\alpha_D^{25}] = -132.5$  ( $c = 5.43$  in CHCl<sub>3</sub>); 82% ee, determined by HPLC analysis (Daicel Chiralpak AD, *n*-hexane/*i*-PrOH = 90/10, flow rate = 1.0 mL/min,  $\lambda = 254$  nm)  $t_R = 5.01$  min (minor),  $t_R = 6.70$  min (major); <sup>1</sup>H NMR (400 MHz, CDCl<sub>3</sub>):  $\delta$  (ppm)  $\delta$  6.95–6.86 (m, 1H), 6.82–6.75 (m, 1H), 6.60 (s, 1H), 6.52–6.42 (m, 1H), 6.24 (s, 1H), 6.21 (d,  $J = 2.8$  Hz, 1H), 6.18 (d,  $J = 7.6$  Hz, 1H), 4.95 (s, 1H), 4.73 (s, 1H), 4.54 (s, 1H), 3.64 (s, 3H), 2.52 (s, 3H), 2.16–2.06 (m, 1H), 2.05–1.94 (m, 3H), 1.93 (s, 3H), 1.83–1.67 (m, 2H), 1.63–1.28 (m, 4H); <sup>13</sup>C NMR (100 MHz, CDCl<sub>3</sub>):  $\delta$  (ppm) 179.5, 156.5, 153.0, 152.5, 138.0, 133.1, 131.99, 131.96, 127.8, 127.5, 124.4, 121.9, 121.6, 120.3, 119.0, 117.3, 105.2, 76.1, 62.3, 50.2, 34.4, 32.6, 30.1, 25.7, 21.7, 21.4, 20.6, 19.0; HRMS (ESI-TOF)  $m/z$ :  $[M + H]^+$  Calcd for  $C_{28}H_{30}NO_2^+$  412.2271; Found 412.2270.

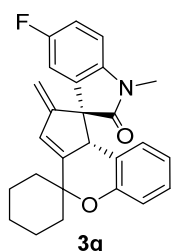

**Synthesis of 3q:** To an oven-dried 10 mL Schlenk tube equipped with a magnetic stirring bar were added 1-(but-3-en-1-yn-1-yl)cyclohexyl *tert*-butyl carbonate **1a** (37.6 mg, 0.150 mmol, 1.5 equiv), (*E*)-5-fluoro-3-(2-hydroxybenzylidene)-1-methyl indolin-2-one **2k** (26.9 mg, 0.0999 mmol, 1.0 equiv), Pd<sub>2</sub>dba<sub>3</sub> (4.6 mg, 0.0050 mmol, 5 mol%), **L3** (9.8 mg, 0.012 mmol, 12 mol%) and KHCO<sub>3</sub> (12.0 mg, 0.120 mmol, 1.2 equiv). The tube was capped, evacuated and back-filled with argon for five times. Then degassed dry DMA (2.0 mL) was added via syringe. The mixture was stirred at 45 °C for 60 h, and monitored by TLC (EtOAc/petroleum ether = 1/8). After completion, the solvent was evaporated in vacuo. The

residue was purified by flash chromatography on silica gel (EtOAc/petroleum ether = 1/8) to give the product **3q**: 29.4 mg (0.0732 mmol), as a white solid, 73% yield; mp 133–135 °C; >19:1 dr, determined by <sup>1</sup>H NMR analysis of crude product; [ $\alpha_D^{25}$ ] = -89.5 (*c* = 8.32 in CHCl<sub>3</sub>); 92% ee, determined by HPLC analysis (Daicel Chiralpak IA, *n*-hexane/*i*-PrOH = 90/10, flow rate = 1.0 mL/min,  $\lambda$  = 254 nm)  $t_R$  = 5.90 min (minor),  $t_R$  = 6.77 min (major); <sup>1</sup>H NMR (400 MHz, CDCl<sub>3</sub>):  $\delta$  (ppm) 6.97–6.90 (m, 1H), 6.83–6.75 (m, 2H), 6.74–6.69 (m, 1H), 6.51–6.44 (m, 1H), 6.43–6.35 (m, 1H), 6.22 (d, *J* = 3.2 Hz, 1H), 6.18 (d, *J* = 7.6 Hz, 1H), 4.97 (s, 1H), 4.76 (s, 1H), 4.55 (s, 1H), 3.38 (s, 3H), 2.19–2.04 (m, 1H), 2.04–1.90 (m, 3H), 1.79–1.68 (m, 2H), 1.60–1.24 (m, 4H); <sup>13</sup>C NMR (100 MHz, CDCl<sub>3</sub>):  $\delta$  (ppm) 178.3, 159.1 (d, <sup>1</sup>*J*<sub>FC</sub> = 239.5 Hz), 155.2, 153.0, 152.6, 138.6 (d, *J* = 1.9 Hz), 134.0 (d, <sup>3</sup>*J*<sub>FC</sub> = 8.6 Hz), 128.0, 127.3, 124.3, 121.4, 120.5, 117.7, 114.1 (d, <sup>2</sup>*J*<sub>FC</sub> = 23.6 Hz), 111.0 (d, <sup>1</sup>*J*<sub>FC</sub> = 24.9 Hz), 108.4 (d, *J* = 8.2 Hz), 105.7, 76.1, 63.2, 49.8, 34.4, 32.5, 26.9, 25.6, 21.6, 21.3; <sup>19</sup>F NMR (375 MHz, CDCl<sub>3</sub>):  $\delta$  (ppm) -120.2; HRMS (ESI-TOF) *m/z*: [M + H]<sup>+</sup> Calcd for C<sub>26</sub>H<sub>25</sub>FNO<sub>2</sub><sup>+</sup> 402.1864; Found 402.1865.

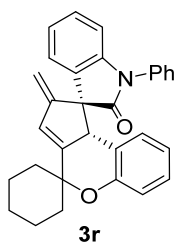

**Synthesis of 3r:** To an oven-dried 10 mL Schlenk tube equipped with a magnetic stirring bar were added 1-(but-3-en-1-yn-1-yl)cyclohexyl *tert*-butyl carbonate **1a** (37.6 mg, 0.150 mmol, 1.5 equiv), (*E*)-3-(2-hydroxybenzylidene)-1-phenylindolin-2-one **2l** (31.4 mg, 0.0100 mmol, 1.0 equiv), Pd<sub>2</sub>dba<sub>3</sub> (4.6 mg, 0.0050 mmol, 5 mol%), **L3** (9.8 mg, 0.012 mmol, 12 mol%) and KHCO<sub>3</sub> (12.0 mg, 0.120 mmol, 1.2 equiv).

The tube was capped, evacuated and back-filled with argon for five times. Then degassed dry DMA (2.0 mL) was added via syringe. The mixture was stirred at 45 °C for 60 h, and monitored by TLC (EtOAc/petroleum ether = 1/8). After completion, the solvent was evaporated in vacuo. The residue was purified by flash chromatography on silica gel (EtOAc/petroleum ether = 1/8) to give the product **3r**: 27.7 mg (0.0622 mmol), as a white solid, 62% yield; mp 189–191 °C; >19:1 dr, determined by <sup>1</sup>H NMR analysis of crude product; [ $\alpha_D^{25}$ ] = -132.4 (*c* = 6.43 in CHCl<sub>3</sub>); 91% ee, determined by HPLC analysis (Daicel Chiralpak IB, *n*-hexane/*i*-PrOH = 90/10, flow rate = 1.0 mL/min,  $\lambda$  = 254 nm)  $t_R$  = 7.09 min (minor),  $t_R$  = 8.68 min (major); <sup>1</sup>H NMR (400 MHz, CDCl<sub>3</sub>):  $\delta$  (ppm) 7.69–7.50 (m, 4H), 7.50–7.41 (m, 1H), 7.03–6.97 (m, 1H), 6.97–6.91 (m, 1H), 6.86–6.80 (m, 1H), 6.80–6.75 (m, 1H), 6.74–6.61 (m, 2H), 6.57–6.48 (m, 1H), 6.46–6.36 (m, 1H), 6.27 (d, *J* = 2.8 Hz, 1H), 5.04 (s, 1H), 4.86 (s, 1H), 4.75 (s, 1H), 2.20–2.09 (m, 1H), 2.08–1.92 (m, 3H), 1.84–1.67 (m, 2H), 1.58–1.30 (m, 4H); <sup>13</sup>C NMR (100 MHz, CDCl<sub>3</sub>):  $\delta$  (ppm) 178.0, 156.0, 153.1, 152.5, 142.5, 134.7, 132.2, 129.8, 128.2,

127.8, 127.63, 127.62, 126.5, 124.4, 123.2, 123.1, 121.8, 120.5, 117.6, 109.4, 105.6, 76.2, 63.1, 50.3, 34.4, 32.5, 25.6, 21.7, 21.3; HRMS (ESI-TOF)  $m/z$ :  $[M + Na]^+$  Calcd for  $C_{31}H_{28}NO_2^+$  446.2115; Found 446.2112.

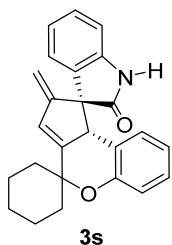

**Synthesis of 3s:** To an oven-dried 10 mL Schlenk tube equipped with a magnetic stirring bar were added 1-(but-3-en-1-yn-1-yl)cyclohexyl *tert*-butyl carbonate **1a** (37.6 mg, 0.150 mmol, 1.5 equiv), (*E*)-3-(2-hydroxybenzylidene)indolin-2-one **2m** (23.7 mg, 0.0999 mmol, 1.0 equiv), Pd<sub>2</sub>dba<sub>3</sub> (4.6 mg, 0.0050 mmol, 5 mol%), **L3** (9.8 mg, 0.012 mmol, 12 mol%) and KHCO<sub>3</sub> (12.0 mg, 0.120 mmol, 1.2 equiv). The tube

was capped, evacuated and back-filled with argon for five times. Then degassed dry DMA (2.0 mL) was added via syringe. The mixture was stirred at 45 °C for 60 h, and monitored by TLC (EtOAc/petroleum ether = 1/8). After completion, the solvent was evaporated in vacuo. The residue was purified by flash chromatography on silica gel (EtOAc/petroleum ether = 1/8) to give the product **3s**: 26.3 mg (0.0712 mmol), as a white solid, 71% yield; mp 151–153 °C; >19:1 dr, determined by <sup>1</sup>H NMR analysis of crude product;  $[\alpha_D^{25}] = -231.5$  ( $c = 4.34$  in CHCl<sub>3</sub>); 88% ee, determined by HPLC analysis (Daicel Chiralpak AD, *n*-hexane/*i*-PrOH = 80/20, flow rate = 1.0 mL/min,  $\lambda = 254$  nm)  $t_R = 5.08$  min (minor),  $t_R = 9.23$  min (major); <sup>1</sup>H NMR (400 MHz, CDCl<sub>3</sub>):  $\delta$  (ppm) 9.40–8.81 (m, 1H), 7.04–6.98 (m, 1H), 6.96–6.85 (m, 2H), 6.81 (d,  $J = 8.0$  Hz, 1H), 6.68–6.57 (m, 2H), 6.52–6.44 (m, 1H), 6.38 (d,  $J = 7.6$  Hz, 1H), 6.26 (d,  $J = 2.8$  Hz, 1H), 5.02 (s, 1H), 4.80 (s, 1H), 4.73 (s, 1H), 2.19–2.08 (m, 1H), 2.06–1.93 (m, 3H), 1.77–1.39 (m, 6H); <sup>13</sup>C NMR (100 MHz, CDCl<sub>3</sub>):  $\delta$  (ppm) 155.7, 153.0, 152.6, 139.8, 133.0, 127.79, 127.77, 124.4, 123.3, 122.6, 121.7, 120.5, 117.5, 110.0, 105.6, 76.1, 63.4, 49.9, 34.4, 32.6, 25.6, 21.7, 21.4; HRMS (ESI-TOF)  $m/z$ :  $[M + H]^+$  Calcd for  $C_{25}H_{24}NO_2^+$  370.1802; Found 370.1804.

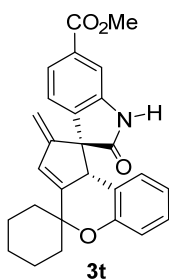

**Synthesis of 3t:** To an oven-dried 10 mL Schlenk tube equipped with a magnetic stirring bar were added 1-(but-3-en-1-yn-1-yl)cyclohexyl *tert*-butyl carbonate **1a** (37.6 mg, 0.150 mmol, 1.5 equiv), methyl (*E*)-3-(2-hydroxybenzylidene)-2-oxoindoline-6-carboxylate **2n** (29.5 mg, 0.0999 mmol, 1.0 equiv), Pd<sub>2</sub>dba<sub>3</sub> (4.6 mg, 0.0050 mmol, 5 mol%), **L3** (9.8 mg, 0.012 mmol, 12 mol%) and KHCO<sub>3</sub> (12.0 mg,

0.120 mmol, 1.2 equiv). The tube was capped, evacuated and back-filled with argon for five times. Then degassed dry DMA (2.0 mL) was added via syringe. The mixture was stirred at 45 °C for 60 h,

and monitored by TLC (EtOAc/petroleum ether = 1/5). After completion, the solvent was evaporated in vacuo. The residue was purified by flash chromatography on silica gel (EtOAc/petroleum ether = 1/5) to give the product **3t**: 27.0 mg (0.0632 mmol), as a white solid, 63% yield; mp 175–177 °C; >19:1 dr, determined by <sup>1</sup>H NMR analysis of crude product; [ $\alpha_D^{25}$ ] = -176.2 (*c* = 6.22 in CHCl<sub>3</sub>); 96% ee, determined by HPLC analysis (Daicel Chiralpak IB, *n*-hexane/*i*-PrOH = 95/5, flow rate = 1.0 mL/min,  $\lambda$  = 254 nm)  $t_R$  = 15.80 min (major),  $t_R$  = 20.27 min (minor); <sup>1</sup>H NMR (400 MHz, CDCl<sub>3</sub>):  $\delta$  (ppm) 8.62 (s, 1H), 7.55 (s, 1H), 7.42–7.32 (m, 1H), 6.96–6.89 (m, 1H), 6.81 (d, *J* = 8.0 Hz, 1H), 6.67 (d, *J* = 7.6 Hz, 1H), 6.51–6.43 (m, 1H), 6.35 (d, *J* = 7.6 Hz, 1H), 6.25 (d, *J* = 2.4 Hz, 1H), 5.02 (s, 1H), 4.83 (s, 1H), 4.71 (s, 1H), 3.84 (s, 3H), 2.16–1.94 (m, 4H), 1.79–1.67 (m, 2H), 1.61–1.27 (m, 4H); <sup>13</sup>C NMR (150 MHz, CDCl<sub>3</sub>):  $\delta$  (ppm) 180.6, 166.5, 155.0, 152.9, 152.6, 139.8, 138.0, 129.8, 128.0, 127.5, 124.5, 124.2, 123.2, 121.3, 120.7, 117.6, 110.6, 106.0, 76.2, 63.3, 52.1, 49.9, 34.4, 32.5, 25.6, 21.6, 21.3; HRMS (ESI-TOF) *m/z*: [M + Na]<sup>+</sup> Calcd for C<sub>27</sub>H<sub>26</sub>NO<sub>4</sub><sup>+</sup> 428.1856; Found 428.1853.

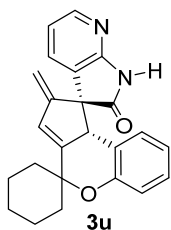

**Synthesis of 3u:** To an oven-dried 10 mL Schlenk tube equipped with a magnetic stirring bar were added 1-(but-3-en-1-yn-1-yl)cyclohexyl *tert*-butyl carbonate **1a** (37.6 mg, 0.150 mmol, 1.5 equiv), (*E*)-3-(2-hydroxybenzylidene)-1,3-dihydro-2*H*-pyrrolo[2,3-*b*]pyridin-2-one **2o** (23.8 mg, 0.0999 mmol, 1.0 equiv), Pd<sub>2</sub>dba<sub>3</sub> (4.6 mg,

0.0050 mmol, 5 mol%), **L3** (9.8 mg, 0.012 mmol, 12 mol%) and KHCO<sub>3</sub> (12.0 mg, 0.120 mmol, 1.2 equiv). The tube was capped, evacuated and back-filled with argon for five times. Then degassed dry DMA (2.0 mL) was added via syringe. The mixture was stirred at 45 °C for 60 h, and monitored by TLC (EtOAc/petroleum ether = 1/5). After completion, the solvent was evaporated in vacuo. The residue was purified by flash chromatography on silica gel (EtOAc/petroleum ether = 1/5) to give the product **3u**: 24.5 mg (0.0661 mmol), as a white solid, 66% yield; mp 193–195 °C; >19:1 dr, determined by <sup>1</sup>H NMR analysis of crude product; [ $\alpha_D^{25}$ ] = -95.3 (*c* = 6.12 in CHCl<sub>3</sub>); 93% ee, determined by HPLC analysis (Daicel Chiralpak AD, *n*-hexane/*i*-PrOH = 80/20, flow rate = 1.0 mL/min,  $\lambda$  = 254 nm)  $t_R$  = 6.63 min (minor),  $t_R$  = 9.88 min (major); <sup>1</sup>H NMR (400 MHz, CDCl<sub>3</sub>):  $\delta$  (ppm) 10.31 (s, 1H), 8.04 (d, *J* = 5.2 Hz, 1H), 6.99–6.94 (m, 1H), 6.89–6.85 (m, 1H), 6.82 (d, *J* = 8.0 Hz, 1H), 6.62–6.58 (m, 1H), 6.57–6.53 (m, 1H), 6.44 (d, *J* = 7.6 Hz, 1H), 6.23 (d, *J* = 2.8 Hz, 1H), 5.03 (s, 1H), 4.83 (s, 1H), 4.79 (s, 1H), 2.11–1.94 (m, 4H), 1.73–1.35 (m, 6H); <sup>13</sup>C NMR (100 MHz, CDCl<sub>3</sub>):  $\delta$  (ppm) 179.4, 155.5, 154.8, 152.9, 152.4, 146.2, 131.1, 128.1, 127.64, 127.60, 124.2, 121.3, 120.8, 118.2,

117.7, 106.1, 76.2, 63.2, 49.5, 34.3, 32.3, 25.6, 21.7, 21.3; HRMS (ESI-TOF)  $m/z$ :  $[M + H]^+$  Calcd for  $C_{24}H_{23}N_2O_2^+$  371.1754; Found 371.1756.

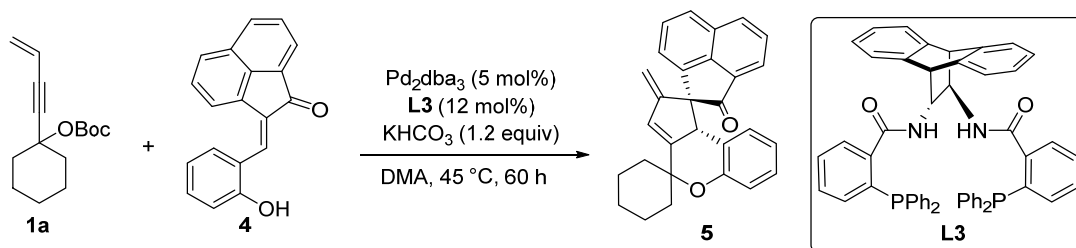

To an oven-dried 10 mL Schlenk tube equipped with a magnetic stirring bar were added 1-(but-3-en-1-yn-1-yl)cyclohexyl *tert*-butyl carbonate **1a** (37.6 mg, 0.150 mmol, 1.5 equiv), (*E*)-2-(2-hydroxy benzylidene)acenaphthylen-1(2*H*)-one **4** (27.2 mg, 0.0999 mmol, 1.0 equiv), Pd<sub>2</sub>dba<sub>3</sub> (4.6 mg, 0.0050 mmol, 5 mol%), **L3** (9.8 mg, 0.012 mmol, 12 mol%) and KHCO<sub>3</sub> (12.0 mg, 0.120 mmol, 1.2 equiv). The tube was capped, evacuated and back-filled with argon for five times. Then degassed dry DMA (2.0 mL) was added via syringe. The mixture was stirred at 45 °C for 60 h, and monitored by TLC (EtOAc/petroleum ether = 1/5). After completion, the solvent was evaporated in vacuo. The residue was purified by flash chromatography on silica gel (EtOAc/petroleum ether = 1/5) to give the product **5**: 30.4 mg (0.0751 mmol), as a white solid, 75% yield; mp 163–165 °C; >19:1 dr, determined by <sup>1</sup>H NMR analysis of crude product;  $[\alpha_D^{25}] = +154.2$  ( $c = 9.43$  in CHCl<sub>3</sub>); 83% ee, determined by HPLC analysis (Daicel Chiralpak IE, *n*-hexane/*i*-PrOH = 95/5, flow rate = 1.0 mL/min,  $\lambda = 254$  nm)  $t_R = 8.08$  min (minor),  $t_R = 8.62$  min (major); <sup>1</sup>H NMR (400 MHz, CDCl<sub>3</sub>):  $\delta$  (ppm)  $\delta$  8.19–8.05 (m, 2H), 7.77 (t,  $J = 7.2$  Hz, 1H), 7.64 (d,  $J = 8.0$  Hz, 1H), 7.25–7.21 (m, 1H), 6.90–6.75 (m, 3H), 6.25 (d,  $J = 2.4$  Hz, 1H), 6.21–6.12 (m, 1H), 5.79 (d,  $J = 7.6$  Hz, 1H), 4.90 (s, 2H), 4.33 (s, 1H), 2.24–2.12 (m, 1H), 2.11–1.96 (m, 3H), 1.86–1.62 (m, 3H), 1.60–1.53 (m, 1H), 1.53–1.37 (m, 2H); <sup>13</sup>C NMR (100 MHz, CDCl<sub>3</sub>):  $\delta$  (ppm) 206.2, 157.9, 152.8, 152.6, 141.9, 141.6, 133.6, 132.0, 130.8, 128.8, 128.0, 127.8, 127.5, 124.4, 123.7, 122.2, 122.1, 120.1, 119.7, 117.5, 105.6, 76.2, 68.1, 49.7, 34.5, 32.6, 25.7, 21.8, 21.4; HRMS (ESI-TOF)  $m/z$ :  $[M + H]^+$  Calcd for  $C_{29}H_{25}O_2^+$  405.1849; Found 405.1851.

## 4.2 Procedure for asymmetric synthesis of 7 and 9

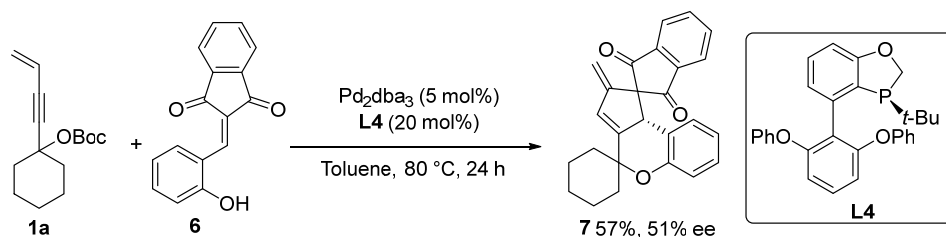

To an oven-dried 10 mL Schlenk tube equipped with a magnetic stirring bar were added 1-(but-3-en-1-yn-1-yl)cyclohexyl *tert*-butyl carbonate **1a** (37.6 mg, 0.150 mmol, 1.5 equiv), 2-(2-hydroxybenzylidene)-1*H*-indene-1,3(2*H*)-dione **6** (25.0 mg, 0.0999 mmol, 1.0 equiv), Pd<sub>2</sub>dba<sub>3</sub> (4.6 mg, 0.0050 mmol, 5 mol%) and **L4** (9.1 mg, 0.020 mmol, 20 mol%). The tube was capped, evacuated and back-filled with argon for five times. Then degassed dry Tol (1.0 mL) was added via syringe. The mixture was stirred at 80 °C for 24 h, and monitored by TLC (EtOAc/petroleum ether = 1/5). After completion, the solvent was evaporated in vacuo. The residue was purified by flash chromatography on silica gel (EtOAc/petroleum ether = 1/5) to give the product **7**: 21.9 mg (0.0573 mmol), as a white solid, 57% yield; mp 234–236 °C; [ $\alpha_D^{25}$ ] = +175.3 (*c* = 4.23 in CHCl<sub>3</sub>); 51% ee, determined by HPLC analysis (Daicel Chiralpak IB, *n*-hexane/*i*-PrOH = 90/10, flow rate = 1.0 mL/min,  $\lambda$  = 254 nm)  $t_R$  = 7.75 min (major),  $t_R$  = 8.49 min (minor); <sup>1</sup>H NMR (400 MHz, CDCl<sub>3</sub>):  $\delta$  (ppm) 8.20–8.13 (m, 1H), 7.94–7.84 (m, 3H), 7.07–6.98 (m, 1H), 6.94–6.85 (m, 1H), 6.58–6.50 (m, 1H), 6.21 (d, *J* = 7.6 Hz, 1H), 6.10 (d, *J* = 2.8 Hz, 1H), 4.97 (s, 1H), 4.86 (s, 1H), 4.28 (s, 1H), 2.17–2.10 (m, 1H), 2.03–1.88 (m, 3H), 1.78–1.68 (m, 2H), 1.60–1.23 (m, 4H); <sup>13</sup>C NMR (100 MHz, CDCl<sub>3</sub>):  $\delta$  (ppm) 201.3, 195.1, 154.4, 153.1, 153.0, 143.6, 142.7, 136.1, 135.6, 128.1, 126.6, 124.7, 123.71, 123.68, 121.9, 120.5, 118.1, 106.2, 76.0, 68.6, 47.2, 34.2, 32.8, 25.6, 21.6, 21.4; HRMS (ESI-TOF) *m/z*: [M + Na]<sup>+</sup> Calcd for C<sub>26</sub>H<sub>22</sub>NO<sub>3</sub>Na<sup>+</sup> 405.1461; Found 405.1459.

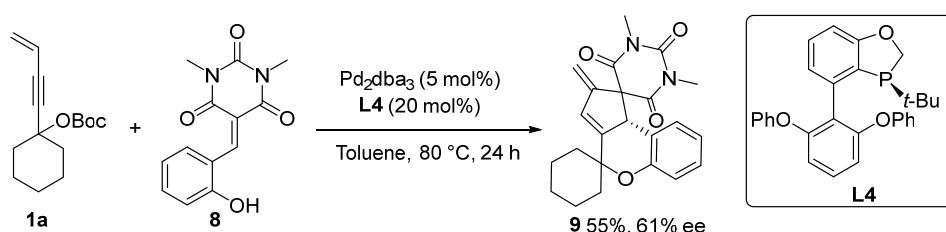

To an oven-dried 10 mL Schlenk tube equipped with a magnetic stirring bar were added 1-(but-3-en-1-yn-1-yl)cyclohexyl *tert*-butyl carbonate **1a** (37.6 mg, 0.150 mmol, 1.5 equiv), 5-(2-hydroxybenzylidene)-1,3-dimethylpyrimidine-2,4,6(1*H*,3*H*,5*H*)-trione **8** (26.0 mg, 0.0999 mmol, 1.0 equiv),



Pd<sub>2</sub>dba<sub>3</sub> (4.6 mg, 0.0050 mmol, 5 mol%) and **L4** (9.1 mg, 0.020 mmol, 20 mol%). The tube was capped, evacuated and back-filled with argon for five times. Then degassed dry toluene (1.0 mL) was added via syringe. The mixture was stirred at 45 °C for 24 h, and monitored by TLC (EtOAc/petroleum ether = 1/5). After completion, the solvent was evaporated in vacuo. The residue was purified by flash chromatography on silica gel (EtOAc/petroleum ether = 1/5) to give the product **9**: 21.6 mg (0.0550 mmol), as a white solid, 55% yield; mp 148–150 °C; [ $\alpha_D^{25}$ ] = +98.3 (*c* = 5.32 in CHCl<sub>3</sub>); 61% ee, determined by HPLC analysis (Daicel Chiralpak AD, *n*-hexane/*i*-PrOH = 80/20, flow rate = 1.0 mL/min,  $\lambda$  = 254 nm) *t*<sub>R</sub> = 5.22 min (minor), *t*<sub>R</sub> = 6.21 min (major); <sup>1</sup>H NMR (400 MHz, CDCl<sub>3</sub>):  $\delta$  (ppm) 7.14–7.07 (m, 1H), 6.93 (d, *J* = 8.0 Hz, 1H), 6.82–6.75 (m, 1H), 6.53 (d, *J* = 7.6 Hz, 1H), 6.01 (d, *J* = 2.8 Hz, 1H), 5.13 (s, 1H), 5.07 (s, 1H), 4.76 (s, 1H), 3.52 (s, 3H), 3.08 (s, 3H), 2.15–2.06 (m, 1H), 2.02–1.85 (m, 3H), 1.77–1.60 (m, 3H), 1.52–1.33 (m, 3H); <sup>13</sup>C NMR (100 MHz, CDCl<sub>3</sub>):  $\delta$  (ppm) 170.0, 165.7, 154.5, 153.7, 153.2, 151.2, 128.2, 125.3, 122.3, 121.6, 120.9, 118.2, 105.7, 76.1, 65.6, 50.4, 34.2, 32.7, 29.4, 28.8, 25.5, 21.5, 21.2; HRMS (ESI-TOF) *m/z*: [M + Na]<sup>+</sup> Calcd for C<sub>23</sub>H<sub>24</sub>N<sub>2</sub>O<sub>4</sub>Na<sup>+</sup> 415.1628; Found 415.1628.

## 5 General procedure for reactions of racemic 1-alkyl-substituted 4-aken-2-ynyl carbonates **10**

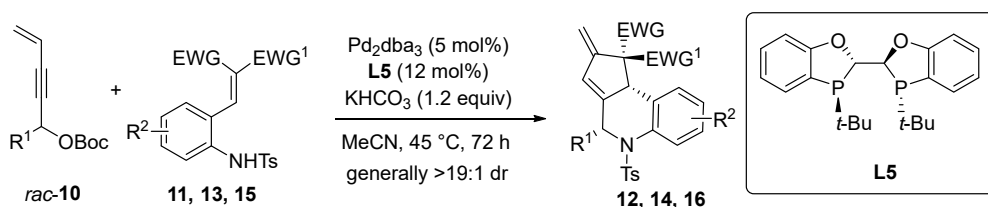

**General procedure:** To an oven-dried 10 mL Schlenk tube equipped with a magnetic stirring bar were added 1-alkyl-substituted 4-aken-2-ynyl carbonate **10** (0.2 mmol, 2.0 equiv), activated alkene **11**, **13** or **15** (0.1 mmol, 1.0 equiv), Pd<sub>2</sub>dba<sub>3</sub> (4.6 mg, 0.0050 mmol, 5 mol%), **L5** (9.8 mg, 0.012 mmol, 12 mol%) and KHCO<sub>3</sub> (12.0 mg, 0.120 mmol, 1.2 equiv). The tube was capped, evacuated and back-filled with argon for five times. Then degassed dry MeCN (1.0 mL) was added via syringe. The mixture was stirred at 45 °C for 72 h, and monitored by TLC (EtOAc/petroleum ether). After completion, the solvent was evaporated in vacuo. The residue was purified by flash chromatography on silica gel (EtOAc/petroleum ether) to give the product.

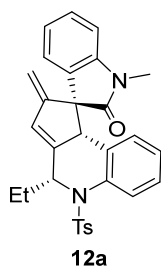

**Synthesis of 12a:** To an oven-dried 10 mL Schlenk tube equipped with a magnetic stirring bar were added *tert*-butyl hept-6-en-4-yn-3-yl carbonate **10a** (42.1 mg, 0.200 mmol, 2.0 equiv), (*E*)-4-methyl-*N*-(2-((1-methyl-2-oxoindolin-3-ylidene)methyl)phenyl) benzene sulfonamide **11a** (40.4 mg, 0.0999 mmol, 1.0 equiv), Pd<sub>2</sub>dba<sub>3</sub> (4.6 mg, 0.0050 mmol, 5 mol%), **L5** (4.6 mg, 0.012 mmol, 12 mol%) and KHCO<sub>3</sub> (12.0 mg,

0.120 mmol, 1.2 equiv). The tube was capped, evacuated and back-filled with argon for five times. Then degassed dry MeCN (1.0 mL) was added via syringe. The mixture was stirred at 45 °C for 72 h, and monitored by TLC (EtOAc/petroleum ether = 1/5). After completion, the solvent was evaporated in vacuo. The residue was purified by flash chromatography on silica gel (EtOAc/petroleum ether = 1/5) to give the product **12a**: 34.8 mg (0.0701 mmol), as a white solid, 70% yield; mp 134–136 °C; >19:1 dr, determined by <sup>1</sup>H NMR analysis of crude product; [ $\alpha_D^{25}$ ] = -135.7 (*c* = 12.3 in CHCl<sub>3</sub>); 93% ee, determined by HPLC analysis (Daicel Chiralpak AD, *n*-hexane/*i*-PrOH = 80/20, flow rate = 1.0 mL/min,  $\lambda$  = 254 nm)  $t_R$  = 4.92 min (minor),  $t_R$  = 7.77 min (major); <sup>1</sup>H NMR (400 MHz, CDCl<sub>3</sub>):  $\delta$  (ppm) 7.63 (d, *J* = 8.0 Hz, 1H), 7.34–7.27 (m, 2H), 7.21–7.14 (m, 3H), 7.14–7.08 (m, 1H), 6.89 (d, *J* = 7.6 Hz, 1H), 6.79–6.68 (m, 2H), 6.58 (d, *J* = 6.8 Hz, 1H), 6.05 (s, 1H), 5.74 (d, *J* = 7.6 Hz, 1H), 5.33–5.20 (m, 1H), 4.71 (s, 1H), 4.38 (s, 1H), 3.31 (s, 3H), 3.02 (s, 1H), 2.45 (s, 3H), 1.73–1.52 (m, 2H), 1.17 (t, *J* = 7.6 Hz, 3H); <sup>13</sup>C NMR (150 MHz, CDCl<sub>3</sub>):  $\delta$  (ppm) 176.7, 155.0, 153.3, 144.8, 142.5, 135.8, 134.3, 132.3, 131.6, 129.8, 129.5, 128.1, 126.7, 126.6, 126.5, 126.2, 124.4, 122.6, 122.4, 108.5, 103.3, 61.6, 58.1, 50.1, 31.5, 26.7, 21.7, 10.8; HRMS (ESI-TOF) *m/z*: [M + Na]<sup>+</sup> Calcd for C<sub>30</sub>H<sub>28</sub>N<sub>2</sub>O<sub>3</sub>SNa<sup>+</sup> 519.1713; Found 519.1720.

**Recovered S-10a:** 43% yield; [ $\alpha_D^{25}$ ] = -75.5 (*c* = 2.2 in CHCl<sub>3</sub>); 68% ee, determined by HPLC analysis (Daicel Chiralpak AD, *n*-hexane/*i*-PrOH = 99/1, flow rate = 0.4 mL/min,  $\lambda$  = 254 nm)  $t_R$  = 11.24 min (minor),  $t_R$  = 13.06 min (major).

**Asymmetric synthesis of 12a on a 1.0 mmol scale:** To an oven-dried 50 mL Schlenk tube equipped with a magnetic stirring bar were added *tert*-butyl hept-6-en-4-yn-3-yl carbonate **10a** (420.6 mg, 2.000 mmol), (*E*)-4-methyl-*N*-(2-((1-methyl-2-oxoindolin-3-ylidene)methyl)phenyl) benzenesulfonamide **11a** (404.5 mg, 1.000 mmol), Pd<sub>2</sub>(dba)<sub>3</sub> (45.8 mg, 0.0500 mmol, 5 mol%), **L5** (46.4 mg, 0.120 mmol, 12 mol%) and KHCO<sub>3</sub> (120.2 mg, 1.201 mmol). The tube was capped, evacuated and back-filled with argon for five times. Then degassed dry MeCN (10 mL) was added via syringe. The

mixture was stirred at 45 °C for 72 h, and monitored by TLC (EtOAc/petroleum ether = 1/5). After completion, the solvent was evaporated in vacuo. The residue was purified by flash chromatography on silica gel (EtOAc/petroleum ether = 1/5) to give the product **12a**: 322.9 mg (0.6502 mmol), as a white solid, 65% yield, >19:1 *dr*, 93% *ee*.

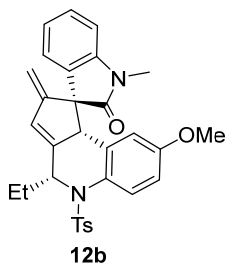

**Synthesis of 12b:** To an oven-dried 10 mL Schlenk tube equipped with a magnetic stirring bar were added *tert*-butylhept-6-en-4-yn-3-yl carbonate **10a** (42.1 mg, 0.200 mmol, 2.0 equiv), (*E*)-*N*-(4-methoxy-2-((1-methyl-2-oxoindolin-3-ylidene)methyl)phenyl)-4-methylbenzenesulfonamide **11b** (43.4 mg, 0.0999 mmol, 1.0 equiv), Pd<sub>2</sub>dba<sub>3</sub> (4.6 mg, 0.0050 mmol, 5 mol%), **L5** (4.6 mg, 0.012 mmol, 12

mol%) and KHCO<sub>3</sub> (12.0 mg, 0.120 mmol, 1.2 equiv). The tube was capped, evacuated and back-filled with argon for five times. Then degassed dry MeCN (1.0 mL) was added via syringe. The mixture was stirred at 45 °C for 72 h, and monitored by TLC (EtOAc/petroleum ether = 1/5). After completion, the solvent was evaporated in vacuo. The residue was purified by flash chromatography on silica gel (EtOAc/petroleum ether = 1/5) to give the product **12b**: 34.9 mg (0.0663 mmol), as a white solid, 66% yield; mp 154–156 °C; >19:1 *dr*, determined by <sup>1</sup>H NMR analysis of crude product; [ $\alpha_D^{25}$ ] = -114.7 (*c* = 0.30 in CHCl<sub>3</sub>); 93% *ee*, determined by HPLC analysis (Daicel Chiralpak AD, *n*-hexane/*i*-PrOH = 80/20, flow rate = 1.0 mL/min,  $\lambda$  = 254 nm) *t*<sub>R</sub> = 5.17 min (minor), *t*<sub>R</sub> = 8.29 min (major); <sup>1</sup>H NMR (400 MHz, CDCl<sub>3</sub>):  $\delta$  (ppm) 7.51 (d, *J* = 8.8 Hz, 1H), 7.33–7.29 (m, 2H), 7.23–7.16 (m, 3H), 6.88 (d, *J* = 7.6 Hz, 1H), 6.77 (t, *J* = 7.2 Hz, 1H), 6.70–6.63 (m, 1H), 6.61 (d, *J* = 7.2 Hz, 1H), 6.04 (s, 1H), 5.29–5.16 (m, 2H), 4.72 (s, 1H), 4.37 (s, 1H), 3.31 (s, 3H), 3.28 (s, 3H), 2.93 (s, 1H), 2.47 (s, 3H), 1.70–1.62 (m, 1H), 1.59–1.49 (m, 1H), 1.15 (t, *J* = 7.2 Hz, 3H); <sup>13</sup>C NMR (100 MHz, CDCl<sub>3</sub>):  $\delta$  (ppm) 176.7, 157.7, 154.9, 153.2, 144.8, 142.5, 135.8, 133.4, 131.8, 130.6, 129.8, 128.2, 126.9, 126.6, 124.5, 122.9, 122.8, 112.9, 111.2, 108.3, 103.4, 61.5, 58.0, 55.0, 50.5, 31.4, 26.7, 21.7, 10.8; HRMS (ESI-TOF) *m/z*: [M + Na]<sup>+</sup> Calcd for C<sub>31</sub>H<sub>30</sub>N<sub>2</sub>O<sub>4</sub>SNa<sup>+</sup> 549.1818; Found 549.1816.

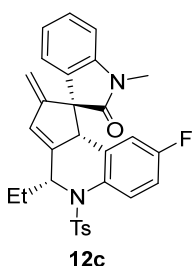

**Synthesis of 12c:** To an oven-dried 10 mL Schlenk tube equipped with a magnetic stirring bar were added *tert*-butyl hept-6-en-4-yn-3-yl carbonate **10a** (42.1 mg, 0.200 mmol, 2.0 equiv), (*E*)-*N*-(4-fluoro-2-((1-methyl-2-oxoindolin-3-ylidene)methyl)phenyl)-4-methylbenzenesulfonamide **11c** (42.2 mg, 0.0999 mmol, 1.0 equiv), Pd<sub>2</sub>dba<sub>3</sub> (4.6 mg, 0.0050 mmol, 5 mol%), **L5** (4.6 mg, 0.012 mmol, 12

mol%) and  $\text{KHCO}_3$  (12.0 mg, 0.120 mmol, 1.2 equiv). The tube was capped, evacuated and back-filled with argon for five times. Then degassed dry MeCN (1.0 mL) was added via syringe. The mixture was stirred at 45 °C for 72 h, and monitored by TLC (EtOAc/petroleum ether = 1/5). After completion, the solvent was evaporated in vacuo. The residue was purified by flash chromatography on silica gel (EtOAc/petroleum ether = 1/5) to give the product **12c**: 36.6 mg (0.0711 mmol), as a white solid, 71% yield; mp 132–134 °C; >19:1 dr, determined by  $^1\text{H}$  NMR analysis of crude product;  $[\alpha_D^{25}] = -85.8$  ( $c = 0.86$  in  $\text{CHCl}_3$ ); 90% ee, determined by HPLC analysis (Daicel Chiralpak AD, *n*-hexane/*i*-PrOH = 80/20, flow rate = 1.0 mL/min,  $\lambda = 254$  nm)  $t_R = 5.20$  min (minor),  $t_R = 8.58$  min (major);  $^1\text{H}$  NMR (400 MHz,  $\text{CDCl}_3$ ):  $\delta$  (ppm) 7.60 (dd,  $J = 8.8, 5.6$  Hz, 1H), 7.34–7.28 (m, 2H), 7.25–7.15 (m, 3H), 6.90 (d,  $J = 8.0$  Hz, 1H), 6.86–6.80 (m, 1H), 6.80–6.74 (m, 1H), 6.58 (d,  $J = 7.6$  Hz, 1H), 6.06 (s, 1H), 5.47–5.39 (m, 1H), 5.28–5.22 (m, 1H), 4.74 (s, 1H), 4.38 (s, 1H), 3.32 (s, 3H), 2.92 (s, 1H), 2.48 (s, 3H), 1.71–1.62 (m, 1H), 1.58–1.50 (m, 1H), 1.16 (t,  $J = 7.2$  Hz, 3H);  $^{13}\text{C}$  NMR (100 MHz,  $\text{CDCl}_3$ ):  $\delta$  (ppm) 176.4, 160.7 (d,  $^1J_{\text{FC}} = 245.1$  Hz), 154.7, 152.4, 145.1, 142.5, 135.6, 134.7 (d,  $^3J_{\text{FC}} = 8.3$  Hz), 131.2, 131.14, 131.10, 130.2 (d,  $J = 2.9$  Hz), 129.9, 128.5, 126.6, 124.8, 122.8, 122.5, 113.7 (d,  $^2J_{\text{FC}} = 22.3$  Hz), 113.3 (d,  $^2J_{\text{FC}} = 24.3$  Hz), 108.7, 103.8, 61.4, 58.0, 50.2, 31.4, 26.7, 21.7, 10.7;  $^{19}\text{F}$  NMR (375 MHz,  $\text{CDCl}_3$ ):  $\delta$  (ppm) –113.6; HRMS (ESI-TOF)  $m/z$ :  $[\text{M} + \text{Na}]^+$  Calcd for  $\text{C}_{30}\text{H}_{27}\text{FN}_2\text{O}_3\text{SNa}^+$  537.1619; Found 537.1617.

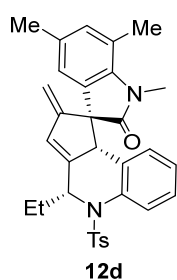

**Synthesis of 12d:** To an oven-dried 10 mL Schlenk tube equipped with a magnetic stirring bar were added *tert*-butyl hept-6-en-4-yn-3-yl carbonate **10a** (42.1 mg, 0.200 mmol, 2.0 equiv), (*E*)-4-methyl-*N*-(2-((1,5,7-trimethyl-2-oxoindolin-3-ylidene)methyl)phenyl)benzenesulfonamide **11d** (43.2 mg, 0.0999 mmol, 1.0 equiv),  $\text{Pd}_2\text{dba}_3$  (4.6 mg, 0.0050 mmol, 5 mol%), **L5** (4.6 mg, 0.012 mmol, 12 mol%) and  $\text{KHCO}_3$

(12.0 mg, 0.120 mmol, 1.2 equiv). The tube was capped, evacuated and back-filled with argon for five times. Then degassed dry MeCN (1.0 mL) was added via syringe. The mixture was stirred at 45 °C for 72 h, and monitored by TLC (EtOAc/petroleum ether = 1/5). After completion, the solvent was evaporated in vacuo. The residue was purified by flash chromatography on silica gel (EtOAc/petroleum ether = 1/5) to give the product **12d**: 36.8 mg (0.0701 mmol), as a white solid, 70% yield; mp 160–161 °C; >19:1 dr, determined by  $^1\text{H}$  NMR analysis of crude product;  $[\alpha_D^{25}] = -65.8$  ( $c = 8.23$  in  $\text{CHCl}_3$ ); 94% ee, determined by HPLC analysis (Daicel Chiralpak IA, *n*-hexane/*i*-PrOH =

90/10, flow rate = 1.0 mL/min,  $\lambda = 254$  nm)  $t_R = 8.90$  min (minor),  $t_R = 12.76$  min (major);  $^1\text{H}$  NMR (400 MHz,  $\text{CDCl}_3$ ):  $\delta$  (ppm) 7.64 (d,  $J = 8.0$  Hz, 1H), 7.33–7.27 (m, 2H), 7.20–7.08 (m, 3H), 6.80 (t,  $J = 7.6$  Hz, 1H), 6.71 (s, 1H), 6.22 (s, 1H), 6.02 (s, 1H), 5.80 (d,  $J = 8.0$  Hz, 1H), 5.31–5.20 (m, 1H), 4.71 (s, 1H), 4.37 (s, 1H), 3.55 (s, 3H), 3.02 (s, 1H), 2.56 (s, 3H), 2.45 (s, 3H), 1.98 (s, 3H), 1.75–1.64 (m, 1H), 1.61–1.52 (m, 1H), 1.17 (t,  $J = 7.2$  Hz, 3H);  $^{13}\text{C}$  NMR (100 MHz,  $\text{CDCl}_3$ ):  $\delta$  (ppm) 177.6, 155.7, 153.4, 144.8, 137.8, 135.9, 134.3, 132.4, 132.39, 132.35, 131.8, 129.8, 129.4, 126.6, 126.5, 126.4, 124.4, 121.2, 119.6, 103.2, 61.1, 58.1, 50.5, 31.4, 30.0, 21.7, 20.7, 19.1, 10.8; HRMS (ESI-TOF)  $m/z$ :  $[\text{M} + \text{H}]^+$  Calcd for  $\text{C}_{32}\text{H}_{33}\text{N}_2\text{O}_3\text{S}^+$  525.2206; Found 525.2210.

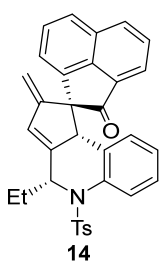

**Synthesis of 14:** To an oven-dried 10 mL Schlenk tube equipped with a magnetic stirring bar were added *tert*-butyl hept-6-en-4-yn-3-yl carbonate **10a** (42.1 mg, 0.200 mmol, 2.0 equiv), (*E*)-4-methyl-*N*-(2-((2-oxoacenaphthylen-1(*2H*)-ylidene)methyl)phenyl)benzenesulfonamide **13** (42.5 mg, 0.0999 mmol, 1.0 equiv),  $\text{Pd}_2\text{dba}_3$  (4.6 mg, 0.0050 mmol, 5 mol%), **L5** (4.6 mg, 0.012 mmol, 12 mol%) and  $\text{KHCO}_3$  (12.0 mg,

0.120 mmol, 1.2 equiv). The tube was capped, evacuated and back-filled with argon for five times. Then degassed dry MeCN (1.0 mL) was added via syringe. The mixture was stirred at 45 °C for 72 h, and monitored by TLC (EtOAc/petroleum ether = 1/6). After completion, the solvent was evaporated in vacuo. The residue was purified by flash chromatography on silica gel (EtOAc/petroleum ether = 1/6) to give the product **14**: 31.6 mg (0.0610 mmol), as a white solid, 61% yield; mp 126–128 °C; >19:1 dr, determined by  $^1\text{H}$  NMR analysis of crude product;  $[\alpha_D^{25}] = -75.3$  ( $c = 0.56$  in  $\text{CHCl}_3$ ); 90% ee, determined by HPLC analysis (Daicel Chiralpak AD, *n*-hexane/*i*-PrOH = 80/20, flow rate = 1.0 mL/min,  $\lambda = 254$  nm)  $t_R = 4.77$  min (minor),  $t_R = 6.70$  min (major);  $^1\text{H}$  NMR (400 MHz,  $\text{CDCl}_3$ ):  $\delta$  (ppm) 8.14 (d,  $J = 8.0$  Hz, 1H), 8.04 (d,  $J = 6.8$  Hz, 1H), 7.81–7.77 (m, 1H), 7.75 (d,  $J = 8.4$  Hz, 1H), 7.65–7.61 (m, 1H), 7.35–7.29 (m, 3H), 7.23–7.19 (m, 2H), 7.07 (t,  $J = 6.8$  Hz, 1H), 6.81 (d,  $J = 6.8$  Hz, 1H), 6.53 (t,  $J = 7.6$  Hz, 1H), 6.04 (s, 1H), 5.39–5.30 (m, 2H), 4.65 (s, 1H), 4.12 (s, 1H), 3.09 (s, 1H), 2.56 (s, 3H), 1.79–1.63 (m, 2H), 1.21 (t,  $J = 7.2$  Hz, 3H);  $^{13}\text{C}$  NMR (100 MHz,  $\text{CDCl}_3$ ):  $\delta$  (ppm) 203.9, 157.3, 153.5, 144.9, 141.2, 141.1, 135.8, 134.3, 133.1, 132.9, 132.0, 131.2, 129.8, 129.7, 128.7, 128.3, 126.61, 126.59, 126.4, 126.3, 124.3, 124.1, 122.1, 119.3, 103.8, 66.8, 58.2, 49.7, 31.7, 21.8, 10.8; HRMS (ESI-TOF)  $m/z$ :  $[\text{M} + \text{H}]^+$  Calcd for  $\text{C}_{33}\text{H}_{28}\text{NO}_3\text{S}^+$  518.1784; Found 518.1793.

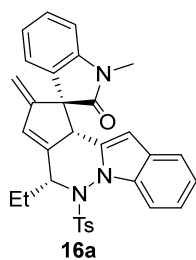

**Synthesis of 16a:** To an oven-dried 10 mL Schlenk tube equipped with a magnetic stirring bar were added *tert*-butyl hept-6-en-4-yn-3-yl carbonate **10a** (42.1 mg, 0.200 mmol, 2.0 equiv), (*E*)-4-methyl-*N*-(2-((1-methyl-2-oxoindolin-3-ylidene)methyl)-1*H*-indol-1-yl)benzenesulfonamide **15a** (44.3 mg, 0.0999 mmol, 1.0 equiv), Pd<sub>2</sub>dba<sub>3</sub> (4.6 mg, 0.0050 mmol, 5 mol%), **L5** (4.6 mg, 0.012 mmol, 12 mol%) and KHCO<sub>3</sub>

(12.0 mg, 0.120 mmol, 1.2 equiv). The tube was capped, evacuated and back-filled with argon for five times. Then degassed dry MeCN (1.0 mL) was added via syringe. The mixture was stirred at 45 °C for 72 h, and monitored by TLC (EtOAc/petroleum ether = 1/5). After completion, the solvent was evaporated in vacuo. The residue was purified by flash chromatography on silica gel (EtOAc/petroleum ether = 1/5) to give the product **16a**: 39.2 mg (0.0732 mmol), as a white solid, 73% yield; mp 114–116 °C; >19:1 dr, determined by <sup>1</sup>H NMR analysis of crude product; [ $\alpha_D^{25}$ ] = -37.6 (*c* = 0.73 in CHCl<sub>3</sub>); 85% ee, determined by HPLC analysis (Daicel Chiralpak IA, *n*-hexane/*i*-PrOH = 95/5, flow rate = 1.0 mL/min,  $\lambda$  = 254 nm) *t*<sub>R</sub> = 10.67 min (minor), *t*<sub>R</sub> = 13.42 min (major); <sup>1</sup>H NMR (400 MHz, CDCl<sub>3</sub>):  $\delta$  (ppm) 7.55 (d, *J* = 8.4 Hz, 1H), 7.50–7.42 (m, 2H), 7.27–7.25 (m, 2H), 7.25–7.22 (m, 1H), 7.22–7.18 (m, 1H), 7.18–7.12 (m, 1H), 7.06–6.98 (m, 1H), 6.91 (d, *J* = 7.6 Hz, 1H), 6.76–6.72 (m, 1H), 6.57 (d, *J* = 7.6 Hz, 1H), 6.15–6.08 (m, 1H), 5.37–5.28 (m, 1H), 4.84 (s, 1H), 4.72 (s, 1H), 4.43 (s, 1H), 3.29 (s, 3H), 3.10 (s, 1H), 2.54 (s, 3H), 1.58–1.49 (m, 1H), 1.39–1.26 (m, 1H), 1.16 (t, *J* = 7.2 Hz, 3H); <sup>13</sup>C NMR (100 MHz, CDCl<sub>3</sub>):  $\delta$  (ppm) 176.4, 154.5, 148.1, 146.9, 142.8, 136.8, 132.8, 132.0, 131.2, 130.3, 128.5, 128.3, 126.4, 125.3, 123.8, 122.4, 122.3, 120.8, 120.1, 110.8, 108.2, 105.6, 98.1, 61.0, 60.8, 48.7, 30.0, 26.7, 21.9, 11.1; HRMS (ESI-TOF) *m/z*: [M + Na]<sup>+</sup> Calcd for C<sub>32</sub>H<sub>29</sub>N<sub>3</sub>O<sub>3</sub>SNa<sup>+</sup> 558.1822; Found 558.1819.

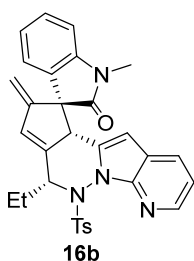

**Synthesis of 16b:** To an oven-dried 10 mL Schlenk tube equipped with a magnetic stirring bar were added *tert*-butyl hept-6-en-4-yn-3-yl carbonate **10a** (42.1 mg, 0.200 mmol, 2.0 equiv), (*E*)-4-methyl-*N*-(2-((1-methyl-2-oxoindolin-3-ylidene)methyl)-1*H*-pyrrolo[2,3-*b*]pyridin-1-yl)benzenesulfonamide **15b** (44.4 mg, 0.0999 mmol, 1.0 equiv), Pd<sub>2</sub>dba<sub>3</sub> (4.6 mg, 0.0050 mmol, 5 mol%), **L5** (4.6 mg, 0.012 mmol, 12 mol%) and KHCO<sub>3</sub> (12.0 mg, 0.120 mmol, 1.2 equiv). The tube was capped, evacuated and back-filled with argon for five times. Then degassed dry MeCN (1.0 mL) was added via syringe. The mixture was stirred at 45 °C for 72 h, and monitored by TLC (EtOAc/petroleum ether = 1/3).

After completion, the solvent was evaporated in vacuo. The residue was purified by flash chromatography on silica gel (EtOAc/petroleum ether = 1/3) to give the product **16b**: 23.2 mg (0.0432 mmol), as a white solid, 43% yield; mp 176–178 °C; >19:1 dr, determined by <sup>1</sup>H NMR analysis of crude product;  $[\alpha_D^{25}] = -74.8$  ( $c = 0.57$  in CHCl<sub>3</sub>); 96% ee, determined by HPLC analysis (Daicel Chiralpak AD, *n*-hexane/*i*-PrOH = 80/20, flow rate = 1.0 mL/min,  $l = 254$  nm)  $t_R = 8.32$  min (minor),  $t_R = 10.30$  min (major); <sup>1</sup>H NMR (400 MHz, CDCl<sub>3</sub>):  $\delta$  (ppm) 8.22 (d,  $J = 3.6$  Hz, 1H), 7.82–7.70 (m, 2H), 7.68–7.58 (m, 1H), 7.41–7.37 (m, 1H), 7.26 (s, 2H), 7.14–7.10 (m, 1H), 7.05–6.91 (m, 3H), 6.25 (s, 1H), 5.52 (s, 1H), 5.29–5.18 (m, 1H), 4.87 (s, 1H), 4.25 (s, 1H), 3.91 (s, 1H), 3.23 (s, 3H), 2.50 (s, 3H), 1.64–1.55 (m, 2H), 1.03 (t,  $J = 7.2$  Hz, 3H); <sup>13</sup>C NMR (100 MHz, CDCl<sub>3</sub>):  $\delta$  (ppm) 174.9, 152.7, 147.4, 147.3, 145.2, 144.2, 143.6, 134.5, 134.1, 129.8, 129.3, 129.2, 128.5, 126.5, 124.0, 122.9, 118.5, 117.1, 108.2, 105.7, 93.9, 61.7, 60.3, 49.6, 29.5, 26.4, 21.8, 10.5; HRMS (ESI-TOF)  $m/z$ :  $[M + Na]^+$  Calcd for C<sub>31</sub>H<sub>28</sub>N<sub>4</sub>O<sub>3</sub>SNa<sup>+</sup> 559.1774; Found 559.1780.

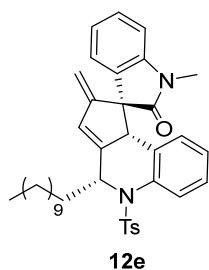

**Synthesis of 12e:** To an oven-dried 10 mL Schlenk tube equipped with a magnetic stirring bar were added *tert*-butyl hexadec-1-en-3-yn-5-yl carbonate **10b** (67.3 mg, 0.200 mmol, 2.0 equiv), (*E*)-4-methyl-*N*-(2-((1-methyl-2-oxoindolin-3-ylidene)methyl)phenyl)benzenesulfonamide **11a** (40.4 mg, 0.0999 mmol, 1.0 equiv), Pd<sub>2</sub>dba<sub>3</sub> (4.6 mg, 0.0050 mmol, 5 mol%), **L5** (4.6 mg, 0.012 mmol, 12

mol %) and KHCO<sub>3</sub> (12.0 mg, 0.120 mmol, 1.2 equiv). The tube was capped, evacuated and back-filled with argon for five times. Then degassed dry MeCN (1.0 mL) was added via syringe. The mixture was stirred at 45 °C for 72 h, and monitored by TLC (EtOAc/petroleum ether = 1/5). After completion, the solvent was evaporated in vacuo. The residue was purified by flash chromatography on silica gel (EtOAc/petroleum ether = 1/5) to give the product **12e**: 38.1 mg (0.0612 mmol), as a white solid, 61% yield; mp 112–114 °C; >19:1 dr, determined by <sup>1</sup>H NMR analysis of crude product;  $[\alpha_D^{25}] = -32.0$  ( $c = 0.15$  in CHCl<sub>3</sub>); 95% ee, determined by HPLC analysis (Daicel Chiralpak AD, *n*-hexane/*i*-PrOH = 80/20, flow rate = 1.0 mL/min,  $l = 254$  nm)  $t_R = 3.85$  min (minor),  $t_R = 7.33$  min (major); <sup>1</sup>H NMR (400 MHz, CDCl<sub>3</sub>):  $\delta$  (ppm) 7.65–7.59 (m, 1H), 7.33–7.27 (m, 2H), 7.22–7.10 (m, 4H), 6.88 (d,  $J = 8.0$  Hz, 1H), 6.79–6.72 (m, 2H), 6.58 (d,  $J = 8.0$  Hz, 1H), 6.06–6.00 (m, 1H), 5.73 (d,  $J = 7.6$  Hz, 1H), 5.34 (t,  $J = 7.2$  Hz, 1H), 4.71 (s, 1H), 4.37 (s, 1H), 3.32 (s, 3H), 2.99 (s, 1H), 2.46 (s, 3H), 1.64–1.59 (m, 2H), 1.36–1.17 (m, 18H), 0.89 (t,  $J = 7.2$  Hz, 3H); <sup>13</sup>C NMR (100 MHz, CDCl<sub>3</sub>):

$\delta$  (ppm) 176.7, 155.1, 153.6, 144.8, 142.5, 135.8, 134.3, 132.4, 131.7, 129.8, 129.6, 128.1, 126.7, 126.58, 126.56, 126.1, 124.3, 122.7, 122.5, 108.5, 103.2, 61.6, 56.7, 50.1, 38.4, 32.0, 29.68, 29.66, 29.63, 29.57, 29.4, 29.1, 26.7, 26.0, 22.7, 21.7, 14.2; HRMS (ESI-TOF)  $m/z$ :  $[M + Na]^+$  Calcd for  $C_{39}H_{46}N_2O_3SNa^+$  645.3121; Found 645.3130.

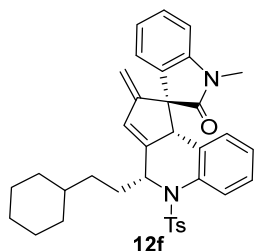

**Synthesis of 12f:** To an oven-dried 10 mL Schlenk tube equipped with a magnetic stirring bar were added *tert*-butyl (1-cyclohexylhept-6-en-4-yn-3-yl) carbonate **10c** (58.5 mg, 0.200 mmol, 2.0 equiv), (*E*)-4-methyl-*N*-(2-((1-methyl-2-oxoindolin-3-ylidene)methyl)phenyl)benzenesulfonamide **11a** (40.4 mg, 0.0999 mmol, 1.0 equiv), Pd<sub>2</sub>dba<sub>3</sub> (4.6 mg, 0.0050 mmol, 5 mol%), **L5** (4.6 mg, 0.012 mmol, 12 mol%) and KHCO<sub>3</sub> (12.0 mg, 0.120 mmol, 1.2 equiv). The tube was capped, evacuated and back-filled with argon for five times. Then degassed dry MeCN (1.0 mL) was added via syringe. The mixture was stirred at 45 °C for 72 h, and monitored by TLC (EtOAc/petroleum ether = 1/6). After completion, the solvent was evaporated in vacuo. The residue was purified by flash chromatography on silica gel (EtOAc/petroleum ether = 1/6) to give the product **12f**: 40.7 mg (0.0703 mmol), as a white solid, 70% yield; mp 116–118 °C; >19:1 dr, determined by <sup>1</sup>H NMR analysis of crude product;  $[\alpha_D^{25}] = +78.5$  ( $c = 0.43$  in CHCl<sub>3</sub>); 94% ee, determined by HPLC analysis (Daicel Chiralpak IA, *n*-hexane/*i*-PrOH = 60/40, flow rate = 1.0 mL/min,  $\lambda = 254$  nm)  $t_R = 4.05$  min (minor),  $t_R = 5.87$  min (major); <sup>1</sup>H NMR (400 MHz, CDCl<sub>3</sub>):  $\delta$  (ppm) 7.61 (d,  $J = 8.0$  Hz, 1H), 7.32–7.27 (m, 2H), 7.23–7.10 (m, 4H), 6.89 (d,  $J = 7.6$  Hz, 1H), 6.80–6.72 (m, 2H), 6.58 (d,  $J = 7.2$  Hz, 1H), 6.03 (s, 1H), 5.73 (d,  $J = 7.6$  Hz, 1H), 5.37–5.24 (m, 1H), 4.71 (s, 1H), 4.37 (s, 1H), 3.32 (s, 3H), 2.97 (s, 1H), 2.46 (s, 3H), 1.80–1.64 (m, 5H), 1.61–1.44 (m, 4H), 1.32–1.11 (m, 4H), 1.00–0.83 (m, 2H); <sup>13</sup>C NMR (100 MHz, CDCl<sub>3</sub>):  $\delta$  (ppm) 176.7, 155.1, 153.6, 144.9, 142.5, 135.8, 134.3, 132.4, 131.7, 129.8, 129.6, 128.1, 126.8, 126.60, 126.57, 126.1, 124.3, 122.7, 122.5, 108.5, 103.3, 61.6, 57.0, 50.1, 37.2, 35.8, 33.6, 33.5, 33.3, 26.7, 26.6, 26.40, 26.37, 21.7; HRMS (ESI-TOF)  $m/z$ :  $[M + Na]^+$  Calcd for  $C_{36}H_{38}N_2O_3SNa^+$  601.2495; Found 601.2498.

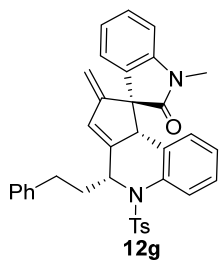

**Synthesis of 12g:** To an oven-dried 10 mL Schlenk tube equipped with a magnetic stirring bar were added *tert*-butyl (1-phenylhept-6-en-4-yn-3-yl) carbonate **10d** (57.3 mg, 0.200 mmol, 2.0 equiv), (*E*)-4-methyl-*N*-(2-((1-methyl-2-oxoindolin-3-ylidene)methyl)phenyl)benzenesulfonamide **11a** (40.4 mg, 0.0999 mmol, 1.0



equiv), Pd<sub>2</sub>dba<sub>3</sub> (4.6 mg, 0.0050 mmol, 5 mol%), **L5** (4.6 mg, 0.012 mmol, 12 mol%) and KHCO<sub>3</sub> (12.0 mg, 0.120 mmol, 1.2 equiv). The tube was capped, evacuated and back-filled with argon for five times. Then degassed dry MeCN (1.0 mL) was added via syringe. The mixture was stirred at 45 °C for 72 h, and monitored by TLC (EtOAc/petroleum ether = 1/7). After completion, the solvent was evaporated in vacuo. The residue was purified by flash chromatography on silica gel (EtOAc/petroleum ether = 1/7) to give the product **12g**: 41.3 mg (0.0721 mmol), as a white solid, 72% yield; mp 147–149 °C; >19:1 dr, determined by <sup>1</sup>H NMR analysis of crude product; [ $\alpha_D^{25}$ ] = +132.8 (*c* = 0.45 in CHCl<sub>3</sub>); 93% ee, determined by HPLC analysis (Daicel Chiralpak IA, *n*-hexane/*i*-PrOH = 80/20, flow rate = 1.0 mL/min,  $\lambda$  = 254 nm) *t*<sub>R</sub> = 6.01 min (minor), *t*<sub>R</sub> = 10.28 min (major); <sup>1</sup>H NMR (400 MHz, CDCl<sub>3</sub>):  $\delta$  (ppm) 7.66 (d, *J* = 8.0 Hz, 1H), 7.34–7.27 (m, 4H), 7.27–7.25 (m, 1H), 7.25–7.12 (m, 6H), 6.87 (d, *J* = 8.0 Hz, 1H), 6.78 (t, *J* = 7.6 Hz, 1H), 6.71 (t, *J* = 7.6 Hz, 1H), 6.54 (d, *J* = 8.0 Hz, 1H), 6.07–6.02 (m, 1H), 5.73 (d, *J* = 8.0 Hz, 1H), 5.47–5.39 (m, 1H), 4.71 (s, 1H), 4.37 (s, 1H), 3.31 (s, 3H), 3.07–2.90 (m, 3H), 2.47 (s, 3H), 1.95–1.78 (m, 2H); <sup>13</sup>C NMR (100 MHz, CDCl<sub>3</sub>):  $\delta$  (ppm) 176.7, 155.0, 153.1, 145.0, 142.5, 141.4, 135.7, 134.2, 132.5, 131.6, 129.9, 129.7, 128.7, 128.5, 128.1, 126.9, 126.7, 126.6, 126.3, 126.1, 124.7, 122.7, 122.5, 108.5, 103.6, 61.6, 56.7, 50.1, 40.3, 32.6, 26.7, 21.7; HRMS (ESI-TOF) *m/z*: [M + Na]<sup>+</sup> Calcd for C<sub>36</sub>H<sub>32</sub>N<sub>2</sub>O<sub>3</sub>SNa<sup>+</sup> 595.2026; Found 595.2033.

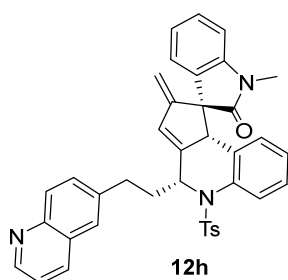

**Synthesis of 12h:** To an oven-dried 10 mL Schlenk tube equipped with a magnetic stirring bar were added *tert*-butyl (1-(quinolin-6-yl)hept-6-en-4-yn-3-yl) carbonate **10e** (67.5 mg, 0.200 mmol, 2.0 equiv), (*E*)-4-methyl-*N*-(2-((1-methyl-2-oxoindolin-3-ylidene)methyl)phenyl)benzenesulfonamide **11a** (40.4 mg, 0.0999 mmol, 1.0 equiv), Pd<sub>2</sub>dba<sub>3</sub> (4.6 mg, 0.0050 mmol, 5

mol%), **L5** (4.6 mg, 0.012 mmol, 12 mol%) and KHCO<sub>3</sub> (12.0 mg, 0.120 mmol, 1.2 equiv). The tube was capped, evacuated and back-filled with argon for five times. Then degassed dry MeCN (1.0 mL) was added via syringe. The mixture was stirred at 45 °C for 72 h, and monitored by TLC (EtOAc/petroleum ether = 1/4). After completion, the solvent was evaporated in vacuo. The residue was purified by flash chromatography on silica gel (EtOAc/petroleum ether = 1/4) to give the product **12h**: 33.8 mg (0.0542 mmol), as a white solid, 54% yield; mp 154–156 °C; >19:1 dr, determined by <sup>1</sup>H NMR analysis of crude product; [ $\alpha_D^{25}$ ] = +76.8 (*c* = 0.68 in CHCl<sub>3</sub>); 97% ee, determined by HPLC

analysis (Daicel Chiralpak AD, *n*-hexane/*i*-PrOH = 60/40, flow rate = 1.0 mL/min,  $\lambda$  = 254 nm)  $t_R$  = 5.59 min (minor),  $t_R$  = 12.87 min (major);  $^1\text{H}$  NMR (400 MHz,  $\text{CDCl}_3$ ):  $\delta$  (ppm) 8.95–8.83 (m, 1H), 8.15 (d,  $J$  = 8.0 Hz, 1H), 8.06 (d,  $J$  = 8.4 Hz, 1H), 7.74 (s, 1H), 7.69 (d,  $J$  = 7.6 Hz, 1H), 7.65–7.56 (m, 1H), 7.43–7.36 (m, 1H), 7.33–7.27 (m, 2H), 7.25–7.10 (m, 4H), 6.88 (d,  $J$  = 7.6 Hz, 1H), 6.80 (t,  $J$  = 7.2 Hz, 1H), 6.70 (t,  $J$  = 7.6 Hz, 1H), 6.54 (d,  $J$  = 7.2 Hz, 1H), 6.05 (s, 1H), 5.75 (d,  $J$  = 7.6 Hz, 1H), 5.53–5.41 (m, 1H), 4.71 (s, 1H), 4.38 (s, 1H), 3.31 (s, 3H), 3.26–3.12 (m, 2H), 2.96 (s, 1H), 2.47 (s, 3H), 2.02–1.90 (m, 2H);  $^{13}\text{C}$  NMR (100 MHz,  $\text{CDCl}_3$ ):  $\delta$  (ppm) 176.6, 154.9, 153.0, 149.9, 147.2, 145.1, 142.5, 139.7, 135.8, 135.5, 134.1, 132.5, 131.6, 131.0, 129.9, 129.7, 129.5, 128.4, 128.2, 127.0, 126.9, 126.8, 126.6, 126.4, 124.8, 122.7, 122.5, 121.2, 108.5, 103.7, 61.6, 56.5, 50.0, 40.2, 32.6, 26.7, 21.7; HRMS (ESI-TOF)  $m/z$ :  $[\text{M} + \text{H}]^+$  Calcd for  $\text{C}_{39}\text{H}_{34}\text{N}_3\text{O}_3\text{S}^+$  624.2315; Found 624.2323.

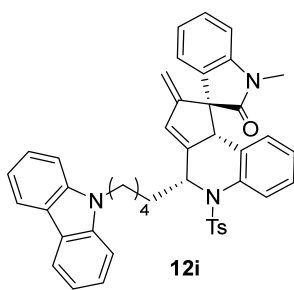

**Synthesis of 12i:** To an oven-dried 10 mL Schlenk tube equipped with a magnetic stirring bar were added 10-(9*H*-carbazol-9-yl)dec-1-en-3-yn-5-yl *tert*-butyl carbonate **10f** (83.5 mg, 0.200 mmol, 2.0 equiv), (*E*)-4-methyl-*N*-(2-((1-methyl-2-oxoindolin-3-ylidene)methyl)phenyl)benzenesulfonamide **11a** (40.4 mg, 0.0999 mmol, 1.0 equiv),  $\text{Pd}_2\text{dba}_3$  (4.6 mg, 0.0050 mmol, 5

mol%), **L5** (4.6 mg, 0.012 mmol, 12 mol%) and  $\text{KHCO}_3$  (12.0 mg, 0.120 mmol, 1.2 equiv). The tube was capped, evacuated and back-filled with argon for five times. Then degassed dry MeCN (1.0 mL) was added via syringe. The mixture was stirred at 45 °C for 72 h, and monitored by TLC (EtOAc/petroleum ether = 1/4). After completion, the solvent was evaporated in vacuo. The residue was purified by flash chromatography on silica gel (EtOAc/petroleum ether = 1/4) to give the product **12i**: 47.3 mg (0.0672 mmol), as a white solid, 67% yield; mp 95–97 °C; >19:1 dr, determined by  $^1\text{H}$  NMR analysis of crude product;  $[\alpha_D^{25}] = -56.8$  ( $c$  = 3.68 in  $\text{CHCl}_3$ ); 93% ee, determined by HPLC analysis (Daicel Chiralpak IA, *n*-hexane/*i*-PrOH = 60/40, flow rate = 1.0 mL/min,  $\lambda$  = 254 nm)  $t_R$  = 5.75 min (minor),  $t_R$  = 8.94 min (major);  $^1\text{H}$  NMR (400 MHz,  $\text{CDCl}_3$ ):  $\delta$  (ppm) 8.10 (d,  $J$  = 8.0 Hz, 2H), 7.66–7.57 (m, 1H), 7.46–7.38 (m, 4H), 7.29–7.25 (m, 2H), 7.24–7.19 (m, 2H), 7.19–7.13 (m, 3H), 7.13–7.06 (m, 1H), 6.86 (d,  $J$  = 7.6 Hz, 1H), 6.75 (t,  $J$  = 7.6 Hz, 1H), 6.67 (t,  $J$  = 8.4 Hz, 1H), 6.49 (d,  $J$  = 7.2 Hz, 1H), 5.98–5.90 (m, 1H), 5.71 (d,  $J$  = 7.6 Hz, 1H), 5.31 (t,  $J$  = 7.6 Hz, 1H), 4.68 (s, 1H), 4.40–4.29 (m, 3H), 3.30 (s, 3H), 2.96 (s, 1H), 2.45 (s, 3H), 2.01–1.89 (m, 2H), 1.76–1.64 (m, 2H), 1.57–1.33 (m, 4H);  $^{13}\text{C}$  NMR (100 MHz,  $\text{CDCl}_3$ ):  $\delta$  (ppm) 176.7, 155.0, 153.3, 144.9, 142.5,

140.5, 135.7, 134.2, 132.4, 131.7, 129.8, 129.6, 128.1, 126.9, 126.7, 126.6, 126.3, 125.7, 124.5, 122.8, 122.7, 122.5, 120.3, 118.8, 108.7, 108.5, 103.4, 61.6, 56.6, 50.1, 42.9, 38.2, 28.9, 26.7, 26.5, 25.8, 21.7; HRMS (ESI-TOF)  $m/z$ :  $[M + Na]^+$  Calcd for  $C_{45}H_{41}N_3O_3SNa^+$  726.2761; Found 726.2757.

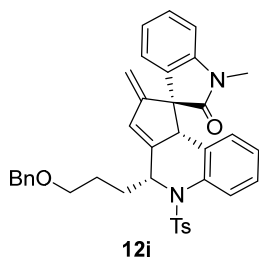

**Synthesis of 12j:** To an oven-dried 10 mL Schlenk tube equipped with a magnetic stirring bar were added 1-(benzyloxy)oct-7-en-5-yn-4-yl *tert*-butyl carbonate **10g** (66.1 mg, 0.200 mmol, 2.0 equiv), (*E*)-4-methyl-*N*-(2-((1-methyl-2-oxoindolin-3-ylidene)methyl)phenyl)benzenesulfonamide **11a** (40.4 mg, 0.0999 mmol, 1.0 equiv), Pd<sub>2</sub>dba<sub>3</sub> (4.6 mg, 0.0050 mmol, 5 mol%), **L5**

(4.6 mg, 0.012 mmol, 12 mol%) and KHCO<sub>3</sub> (12.0 mg, 0.120 mmol, 1.2 equiv). The tube was capped, evacuated and back-filled with argon for five times. Then degassed dry MeCN (1.0 mL) was added via syringe. The mixture was stirred at 45 °C for 72 h, and monitored by TLC (EtOAc/petroleum ether = 1/6). After completion, the solvent was evaporated in vacuo. The residue was purified by flash chromatography on silica gel (EtOAc/petroleum ether = 1/6) to give the product **12j**: 47.6 mg (0.0772 mmol), as a white solid, 77% yield; mp 167–169 °C; >19:1 dr, determined by <sup>1</sup>H NMR analysis of crude product;  $[\alpha_D^{25}] = -88.4$  ( $c = 12.5$  in CHCl<sub>3</sub>); 95% ee, determined by HPLC analysis (Daicel Chiralpak AD, *n*-hexane/*i*-PrOH = 80/20, flow rate = 1.0 mL/min,  $\lambda = 254$  nm)  $t_R = 6.18$  min (minor),  $t_R = 9.08$  min (major); <sup>1</sup>H NMR (400 MHz, CDCl<sub>3</sub>):  $\delta$  (ppm) 7.60 (d,  $J = 7.6$  Hz, 1H), 7.38–7.33 (m, 3H), 7.32–7.28 (m, 2H), 7.28–7.25 (m, 2H), 7.22–7.15 (m, 3H), 7.14–7.09 (m, 1H), 6.88 (d,  $J = 8.0$  Hz, 1H), 6.80–6.68 (m, 2H), 6.58 (d,  $J = 7.2$  Hz, 1H), 6.04 (s, 1H), 5.73 (d,  $J = 8.0$  Hz, 1H), 5.38–5.31 (m, 1H), 4.71 (s, 1H), 4.53 (s, 2H), 4.37 (s, 1H), 3.71–3.63 (m, 1H), 3.59–3.52 (m, 1H), 3.31 (s, 3H), 2.97 (s, 1H), 2.46 (s, 3H), 2.01–1.91 (m, 2H), 1.83–1.74 (m, 1H), 1.60–1.53 (m, 1H); <sup>13</sup>C NMR (100 MHz, CDCl<sub>3</sub>):  $\delta$  (ppm) 176.7, 155.0, 153.2, 144.9, 142.5, 138.6, 135.7, 134.2, 132.4, 131.7, 129.8, 129.7, 128.4, 128.1, 127.7, 127.6, 126.8, 126.64, 126.59, 126.2, 124.6, 122.7, 122.5, 108.5, 103.4, 72.8, 69.2, 61.6, 56.4, 50.1, 34.9, 26.7, 26.1, 21.7; HRMS (ESI-TOF)  $m/z$ :  $[M + Na]^+$  Calcd for  $C_{38}H_{36}N_2O_4SNa^+$  639.2288; Found 639.2295.

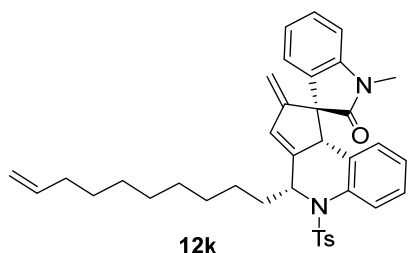

**Synthesis of 12k:** To an oven-dried 10 mL Schlenk tube equipped with a magnetic stirring bar were added *tert*-butyl pentadeca-1,14-dien-3-yn-5-yl carbonate **10h** (64.1 mg, 0.200 mmol, 2.0 equiv), (*E*)-4-methyl-*N*-(2-((1-methyl-2-oxoindolin-3-ylidene)methyl)

phenyl)benzenesulfonamide **11a** (40.4 mg, 0.0999 mmol, 1.0 equiv), Pd<sub>2</sub>dba<sub>3</sub> (4.6 mg, 0.0050 mmol, 5 mol%), **L5** (4.6 mg, 0.012 mmol, 12 mol%) and KHCO<sub>3</sub> (12.0 mg, 0.120 mmol, 1.2 equiv). The tube was capped, evacuated and back-filled with argon for five times. Then degassed dry MeCN (1.0 mL) was added via syringe. The mixture was stirred at 45 °C for 72 h, and monitored by TLC (EtOAc/petroleum ether = 1/6). After completion, the solvent was evaporated in vacuo. The residue was purified by flash chromatography on silica gel (EtOAc/petroleum ether = 1/6) to give the product **12k**: 46.3 mg (0.0763 mmol), as a white solid, 76% yield; mp 105–107 °C; >19:1 dr, determined by <sup>1</sup>H NMR analysis of crude product; [ $\alpha_D^{25}$ ] = -65.8 (*c* = 7.67 in CHCl<sub>3</sub>); 94% ee, determined by HPLC analysis (Daicel Chiralpak AD, *n*-hexane/*i*-PrOH = 80/20, flow rate = 1.0 mL/min,  $\lambda$  = 254 nm) *t*<sub>R</sub> = 4.18 min (minor), *t*<sub>R</sub> = 8.45 min (major); <sup>1</sup>H NMR (400 MHz, CDCl<sub>3</sub>):  $\delta$  (ppm) 7.61 (d, *J* = 7.6 Hz, 1H), 7.35–7.27 (m, 2H), 7.24–7.08 (m, 4H), 6.88 (d, *J* = 7.6 Hz, 1H), 6.81–6.68 (m, 2H), 6.58 (d, *J* = 7.2 Hz, 1H), 6.03 (s, 1H), 5.88–5.77 (m, 1H), 5.73 (d, *J* = 8.0 Hz, 1H), 5.34 (t, *J* = 7.6 Hz, 1H), 5.06–4.96 (m, 1H), 4.94 (d, *J* = 10.8 Hz, 1H), 4.71 (s, 1H), 4.37 (s, 1H), 3.31 (s, 3H), 2.98 (s, 1H), 2.46 (s, 3H), 2.09–1.99 (m, 2H), 1.63–1.52 (m, 4H), 1.47–1.26 (m, 10H); <sup>13</sup>C NMR (150 MHz, CDCl<sub>3</sub>):  $\delta$  (ppm) 176.7, 155.1, 153.6, 144.8, 142.5, 139.2, 135.8, 134.3, 132.4, 131.7, 129.8, 129.6, 128.1, 126.7, 126.6, 126.5, 126.1, 124.3, 122.6, 122.4, 114.1, 108.4, 103.2, 61.6, 56.7, 50.1, 38.4, 33.8, 29.5, 29.4, 29.1, 29.0, 28.9, 26.6, 25.9, 21.6; HRMS (ESI-TOF) *m/z*: [M + H]<sup>+</sup> Calcd for C<sub>38</sub>H<sub>43</sub>N<sub>2</sub>O<sub>3</sub>S<sup>+</sup> 607.2989; Found 607.2994.

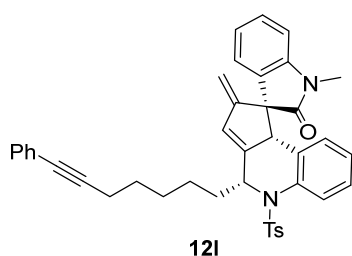

**Synthesis of 12l:** To an oven-dried 10 mL Schlenk tube equipped with a magnetic stirring bar were added *tert*-butyl (12-phenyldodeca-1-en-3,11-diyn-5-yl) carbonate **10i** (70.5 mg, 0.200 mmol, 2.0 equiv), (*E*)-4-methyl-*N*-(2-((1-methyl-2-oxoindolin-3-ylidene)methyl)phenyl)benzenesulfonamide **11a** (40.4 mg, 0.0999 mmol, 1.0 equiv),

Pd<sub>2</sub>dba<sub>3</sub> (4.6 mg, 0.0050 mmol, 5 mol%), **L5** (4.6 mg, 0.012 mmol, 12 mol%) and KHCO<sub>3</sub> (12.0 mg, 0.120 mmol, 1.2 equiv). The tube was capped, evacuated and back-filled with argon for five times. Then degassed dry MeCN (1.0 mL) was added via syringe. The mixture was stirred at 45 °C for 72 h, and monitored by TLC (EtOAc/petroleum ether = 1/7). After completion, the solvent was evaporated in vacuo. The residue was purified by flash chromatography on silica gel (EtOAc/petroleum ether = 1/7) to give the product **12l**: 47.4 mg (0.0742 mmol), as a white solid, 74%

yield; mp 124–126 °C; >19:1 dr, determined by <sup>1</sup>H NMR analysis of crude product; [ $\alpha_D^{25}$ ] = –125.8 (*c* = 8.56 in CHCl<sub>3</sub>); 94% ee, determined by HPLC analysis (Daicel Chiralpak ID, *n*-hexane/*i*-PrOH = 60/40, flow rate = 1.0 mL/min,  $\lambda$  = 254 nm)  $t_R$  = 9.01 min (minor),  $t_R$  = 12.36 min (major); <sup>1</sup>H NMR (600 MHz, CDCl<sub>3</sub>):  $\delta$  (ppm) 7.62 (d, *J* = 7.8 Hz, 1H), 7.44–7.36 (m, 2H), 7.35–7.26 (m, 5H), 7.21–7.15 (m, 3H), 7.14–7.10 (m, 1H), 6.88 (d, *J* = 7.8 Hz, 1H), 6.79–6.71 (m, 2H), 6.57 (d, *J* = 7.2 Hz, 1H), 6.03 (s, 1H), 5.73 (d, *J* = 7.8 Hz, 1H), 5.39–5.33 (m, 1H), 4.71 (s, 1H), 4.37 (s, 1H), 3.31 (s, 3H), 2.98 (s, 1H), 2.46 (s, 3H), 1.75–1.63 (m, 5H), 1.63–1.58 (m, 3H), 1.57–1.45 (m, 2H); <sup>13</sup>C NMR (100 MHz, CDCl<sub>3</sub>):  $\delta$  (ppm) 176.7, 155.0, 153.4, 144.9, 142.5, 135.8, 134.3, 132.4, 131.7, 131.6, 129.8, 129.7, 128.2, 128.1, 127.5, 126.8, 126.61, 126.58, 126.2, 124.4, 124.1, 122.7, 122.5, 108.5, 103.3, 90.7, 80.8, 61.6, 56.6, 50.1, 38.3, 28.7, 28.3, 26.7, 25.6, 21.7, 19.4; HRMS (ESI-TOF) *m/z*: [M + Na]<sup>+</sup> Calcd for C<sub>41</sub>H<sub>38</sub>N<sub>2</sub>O<sub>3</sub>SNa<sup>+</sup> 661.2495; Found 661.2496.

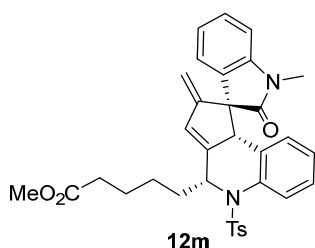

**Synthesis of 12m:** To an oven-dried 10 mL Schlenk tube equipped with a magnetic stirring bar were added methyl 6-((*tert*-butoxycarbonyl)oxy)dec-9-en-7-ynoate **10j** (59.3 mg, 0.200 mmol, 2.0 equiv), (*E*)-4-methyl-*N*-(2-((1-methyl-2-oxoindolin-3-ylidene)methyl)phenyl)benzenesulfonamide **11a** (40.4 mg, 0.0999 mmol, 1.0 equiv), Pd<sub>2</sub>dba<sub>3</sub> (4.6 mg, 0.0050

mmol, 5 mol%), **L5** (4.6 mg, 0.012 mmol, 12 mol%) and KHCO<sub>3</sub> (12.0 mg, 0.120 mmol, 1.2 equiv). The tube was capped, evacuated and back-filled with argon for five times. Then degassed dry MeCN (1.0 mL) was added via syringe. The mixture was stirred at 45 °C for 72 h, and monitored by TLC (EtOAc/petroleum ether = 1/6). After completion, the solvent was evaporated in vacuo. The residue was purified by flash chromatography on silica gel (EtOAc/petroleum ether = 1/6) to give the product **12m**: 29.9 mg (0.0513 mmol), as a white solid, 51% yield; mp 97–99 °C; >19:1 dr, determined by <sup>1</sup>H NMR analysis of crude product; [ $\alpha_D^{25}$ ] = –67.9 (*c* = 6.95 in CHCl<sub>3</sub>); 95% ee, determined by HPLC analysis (Daicel Chiralpak IA, *n*-hexane/*i*-PrOH = 60/40, flow rate = 1.0 mL/min,  $\lambda$  = 254 nm)  $t_R$  = 6.71 min (minor),  $t_R$  = 11.76 min (major); <sup>1</sup>H NMR (400 MHz, CDCl<sub>3</sub>):  $\delta$  (ppm) 7.61 (d, *J* = 8.0 Hz, 1H), 7.31–7.27 (m, 2H), 7.22–7.10 (m, 4H), 6.88 (d, *J* = 7.6 Hz, 1H), 6.82–6.70 (m, 2H), 6.56 (d, *J* = 6.8 Hz, 1H), 6.07–6.00 (m, 1H), 5.73 (d, *J* = 7.6 Hz, 1H), 5.41–5.28 (m, 1H), 4.72 (s, 1H), 4.38 (s, 1H), 3.68 (s, 3H), 3.32 (s, 3H), 2.97 (s, 1H), 2.46 (s, 3H), 2.43–2.33 (m, 2H), 1.84–1.74 (m, 1H), 1.74–1.64 (m, 3H), 1.61–1.49 (m, 2H); <sup>13</sup>C NMR (100 MHz, CDCl<sub>3</sub>):  $\delta$  (ppm) 176.7, 174.1, 155.0,

153.2, 144.9, 142.5, 135.7, 134.1, 132.3, 131.7, 129.8, 129.6, 128.2, 126.8, 126.7, 126.6, 126.2, 124.5, 122.7, 122.5, 108.5, 103.4, 61.6, 56.4, 51.6, 50.0, 38.0, 34.0, 26.7, 25.5, 24.3, 21.7; HRMS (ESI-TOF)  $m/z$ :  $[M + Na]^+$  Calcd for  $C_{34}H_{34}N_2O_5SNa^+$  605.2081; Found 605.2086.

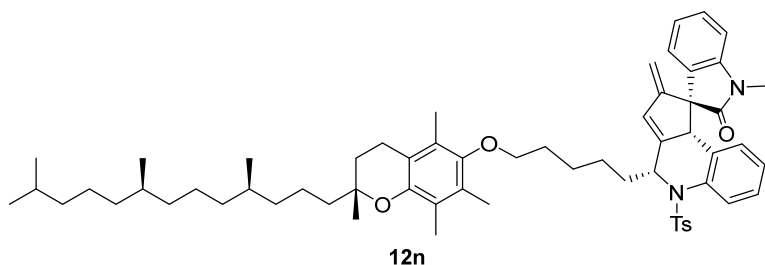

**Synthesis of 12n:** To an oven-dried 10 mL Schlenk tube equipped with a magnetic stirring bar were added *tert*-butyl (10-(((*R*)-2,5,7,8-tetramethyl-2-((4*R*,8*R*)-4,8,12-trimethyltridecyl)

chroman-6-yl)oxy)dec-1-en-3-yn-5-yl) carbonate **10k** (136.2 mg, 0.2000 mmol), (*E*)-4-methyl-*N*-(2-((1-methyl-2-oxoindolin-3-ylidene)methyl)phenyl)benzenesulfonamide **11a** (40.4 mg, 0.0999 mmol, 1.0 equiv), Pd<sub>2</sub>dba<sub>3</sub> (4.6 mg, 0.0050 mmol, 5 mol%), **L5** (4.6 mg, 0.012 mmol, 12 mol%) and KHCO<sub>3</sub> (12.0 mg, 0.120 mmol, 1.2 equiv). The tube was capped, evacuated and back-filled with argon for five times. Then degassed dry MeCN (1.0 mL) was added via syringe. The mixture was stirred at 45 °C for 72 h, and monitored by TLC (EtOAc/petroleum ether = 1/6). After completion, the solvent was evaporated in vacuo. The residue was purified by flash chromatography on silica gel (EtOAc/petroleum ether = 1/6) to give the product **12n**: 59.1 mg (0.0611 mmol), as a white solid, 61% yield; mp 81–83 °C; >19:1 dr, determined by <sup>1</sup>H NMR analysis of crude product;  $[\alpha_D^{25}] = -35.5$  ( $c = 6.87$  in CHCl<sub>3</sub>); <sup>1</sup>H NMR (400 MHz, CDCl<sub>3</sub>):  $\delta$  (ppm) 7.62 (d,  $J = 8.0$  Hz, 1H), 7.33–7.27 (m, 2H), 7.23–7.15 (m, 3H), 7.12 (t,  $J = 8.0$  Hz, 1H), 6.88 (d,  $J = 7.6$  Hz, 1H), 6.79–6.72 (m, 2H), 6.58 (d,  $J = 6.8$  Hz, 1H), 6.07–6.02 (m, 1H), 5.73 (d,  $J = 7.6$  Hz, 1H), 5.37 (t,  $J = 7.2$  Hz, 1H), 4.72 (s, 1H), 4.38 (s, 1H), 3.66 (t,  $J = 6.4$  Hz, 2H), 3.32 (s, 3H), 2.99 (s, 1H), 2.57 (t,  $J = 6.4$  Hz, 2H), 2.46 (s, 3H), 2.16 (s, 3H), 2.12 (s, 3H), 2.08 (s, 3H), 1.85–1.62 (m, 8H), 1.58–1.20 (m, 20H), 1.15–1.01 (m, 6H), 0.88–0.83 (m, 12H); <sup>13</sup>C NMR (100 MHz, CDCl<sub>3</sub>):  $\delta$  (ppm) 176.7, 155.1, 153.5, 148.4, 147.7, 144.9, 142.5, 135.8, 134.3, 132.4, 131.7, 129.8, 129.7, 128.1, 127.8, 126.8, 126.6, 126.2, 125.8, 124.4, 122.8, 122.7, 122.5, 117.5, 108.5, 103.3, 74.8, 72.9, 61.6, 56.7, 50.1, 40.1, 39.4, 38.4, 37.6, 37.5, 37.4, 37.3, 32.8, 32.7, 31.3, 30.3, 28.0, 26.7, 26.1, 25.8, 24.84, 24.82, 24.5, 23.9, 22.8, 22.7, 21.7, 21.1, 20.7, 19.8, 19.7, 19.7, 19.6, 12.8, 12.0, 11.8; HRMS (ESI-TOF)  $m/z$ :  $[M + Na]^+$  Calcd for  $C_{62}H_{82}N_2O_5SNa^+$  989.5837; Found 989.5841.

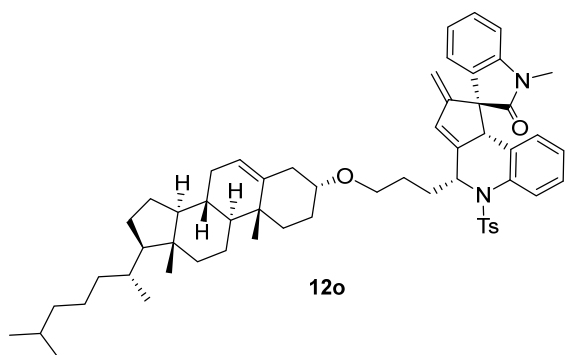

**Synthesis of 12o:** To an oven-dried 10 mL Schlenk tube equipped with a magnetic stirring bar were added *tert*-butyl carbonate **101** (121.8 mg, 0.2000 mmol), (*E*)-4-methyl-*N*-(2-((1-methyl-2-oxoindolin-3-ylidene)methyl)phenyl)benzenesulfonamide **11a** (40.4 mg, 0.0999 mmol, 1.0 equiv), Pd<sub>2</sub>dba<sub>3</sub> (4.6 mg, 0.0050

mmol, 5 mol%), **L5** (4.6 mg, 0.012 mmol, 12 mol%) and KHCO<sub>3</sub> (12.0 mg, 0.120 mmol, 1.2 equiv). The tube was capped, evacuated and back-filled with argon for five times. Then degassed dry MeCN (1.0 mL) was added via syringe. The mixture was stirred at 45 °C for 72 h, and monitored by TLC (EtOAc/petroleum ether = 1/5). After completion, the solvent was evaporated in vacuo. The residue was purified by flash chromatography on silica gel (EtOAc/petroleum ether = 1/5) to give the product **12o**: 60.9 mg (0.0680 mmol), as a white solid, 68% yield; mp 110–112 °C; >19:1 dr, determined by <sup>1</sup>H NMR analysis of crude product; [ $\alpha_D^{25}$ ] = -27.9 (*c* = 8.17 in CHCl<sub>3</sub>); <sup>1</sup>H NMR (400 MHz, CDCl<sub>3</sub>):  $\delta$  (ppm) 7.61 (d, *J* = 8.0 Hz, 1H), 7.31–7.27 (m, 2H), 7.22–7.16 (m, 3H), 7.15–7.10 (m, 1H), 6.88 (d, *J* = 7.6 Hz, 1H), 6.80–6.70 (m, 2H), 6.59 (d, *J* = 7.2 Hz, 1H), 6.06 (s, 1H), 5.73 (d, *J* = 7.6 Hz, 1H), 5.40–5.32 (m, 2H), 4.72 (s, 1H), 4.37 (s, 1H), 3.69–3.60 (m, 1H), 3.59–3.52 (m, 1H), 3.31 (s, 3H), 3.21–3.13 (m, 1H), 2.97 (s, 1H), 2.46 (s, 3H), 2.42–2.32 (m, 1H), 2.25–2.16 (m, 1H), 2.03–1.75 (m, 8H), 1.60–1.02 (m, 21H), 1.01 (s, 3H), 0.98–0.95 (m, 1H), 0.93–0.91 (m, 3H), 0.87 (dd, *J* = 6.4, 1.6 Hz, 6H), 0.68 (s, 3H); <sup>13</sup>C NMR (100 MHz, CDCl<sub>3</sub>):  $\delta$  (ppm) 176.7, 155.0, 153.3, 144.9, 142.5, 141.0, 135.7, 134.2, 132.4, 131.7, 129.8, 129.7, 128.1, 126.8, 126.62, 126.59, 126.2, 124.6, 122.7, 122.6, 121.6, 121.5, 108.5, 103.4, 78.9, 66.8, 61.6, 56.8, 56.3, 56.2, 50.2, 50.1, 42.3, 39.8, 39.5, 39.2, 37.3, 36.9, 36.2, 35.8, 34.9, 32.0, 31.9, 28.55, 28.51, 28.3, 28.0, 26.7, 26.5, 24.3, 23.8, 22.8, 22.6, 21.7, 21.1, 19.4, 18.7, 11.9; HRMS (ESI-TOF) *m/z*: [M + Na]<sup>+</sup> Calcd for C<sub>58</sub>H<sub>74</sub>N<sub>2</sub>O<sub>4</sub>SNa<sup>+</sup> 917.5262; Found 917.5263.

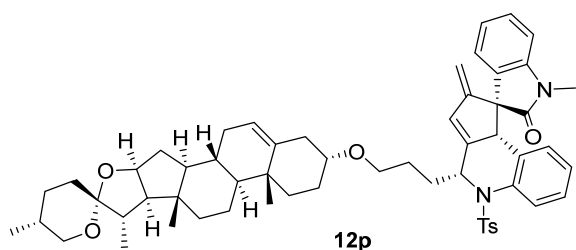

**Synthesis of 12p:** To an oven-dried 10 mL Schlenk tube equipped with a magnetic stirring bar were added *tert*-butyl (1-(((4*S*,5'*S*,6*aS*,6*bR*,8*aR*,8*bS*, 9*R*, 10*S*,11*aR*,12*aR*,12*bR*)-5',6*a*,8*a*,9-tetramethyl-1,3,3', 4,4',5,5',6,6*a*,6*b*,6',7,8,8*a*,8*b*,9,11*a*,12,12*a*,12*b*-

icosahydrospiro[naphtho[2',1':4,5]indeno[2,1-*b*]furan-10,2'-pyran]-4-yl)oxy)oct-7-en-5-yn-4-yl) carbonate **10m** (127.4 mg, 0.2000 mmol), (*E*)-4-methyl-*N*-(2-((1-methyl-2-oxoindolin-3-ylidene)methyl)phenyl)benzenesulfonamide **11a** (40.4 mg, 0.0999 mmol, 1.0 equiv), Pd<sub>2</sub>dba<sub>3</sub> (4.6 mg, 0.0050 mmol, 5 mol%), **L5** (4.6 mg, 0.012 mmol, 12 mol%) and KHCO<sub>3</sub> (12.0 mg, 0.120 mmol, 1.2 equiv). The tube was capped, evacuated and back-filled with argon for five times. Then degassed dry MeCN (1.0 mL) was added via syringe. The mixture was stirred at 45 °C for 72 h, and monitored by TLC (EtOAc/petroleum ether = 1/5). After completion, the solvent was evaporated in vacuo. The residue was purified by flash chromatography on silica gel (EtOAc/petroleum ether = 1/5) to give the product **12p**: 66.6 mg (0.0721 mmol), as a white solid, 72% yield; mp 107–109 °C; >19:1 dr, determined by <sup>1</sup>H NMR analysis of crude product; [ $\alpha_D^{25}$ ] = -76.9 (*c* = 5.84 in CHCl<sub>3</sub>); <sup>1</sup>H NMR (400 MHz, CDCl<sub>3</sub>):  $\delta$  (ppm) 7.61 (d, *J* = 8.0 Hz, 1H), 7.30–7.27 (m, 2H), 7.20–7.15 (m, 3H), 7.15–7.10 (m, 1H), 6.88 (d, *J* = 7.6 Hz, 1H), 6.79–6.71 (m, 2H), 6.59 (d, *J* = 7.2 Hz, 1H), 6.06 (s, 1H), 5.73 (d, *J* = 7.6 Hz, 1H), 5.40–5.32 (m, 2H), 4.72 (s, 1H), 4.44–4.39 (m, 1H), 4.37 (s, 1H), 3.68–3.60 (m, 1H), 3.59–3.51 (m, 1H), 3.50–3.45 (m, 1H), 3.38 (t, *J* = 10.9 Hz, 1H), 3.32 (s, 3H), 3.21–3.13 (m, 1H), 2.97 (s, 1H), 2.46 (s, 3H), 2.42–2.33 (m, 1H), 2.24–2.15 (m, 1H), 2.06–1.66 (m, 12H), 1.61–1.40 (m, 8H), 1.34–1.05 (m, 5H), 1.03 (s, 3H), 1.00–0.94 (m, 4H), 0.81–0.76 (m, 6H); <sup>13</sup>C NMR (100 MHz, CDCl<sub>3</sub>):  $\delta$  (ppm) 176.7, 155.0, 153.3, 144.9, 142.5, 141.1, 135.7, 134.2, 132.4, 131.7, 129.8, 129.7, 128.1, 126.8, 126.62, 126.58, 126.2, 124.6, 122.7, 122.5, 121.30, 121.26, 109.3, 108.5, 103.4, 80.9, 78.9, 78.8, 66.9, 62.1, 61.6, 56.5, 56.3, 50.12, 50.06, 41.6, 40.3, 39.8, 39.2, 37.3, 37.1, 34.9, 32.1, 31.9, 31.5, 31.4, 30.3, 28.8, 28.52, 28.48, 26.7, 26.5, 21.7, 20.9, 19.5, 17.2, 16.3, 14.5; HRMS (ESI-TOF) *m/z*: [M + Na]<sup>+</sup> Calcd for C<sub>58</sub>H<sub>71</sub>N<sub>2</sub>O<sub>6</sub>S<sup>+</sup> 923.5027; Found 923.5032.

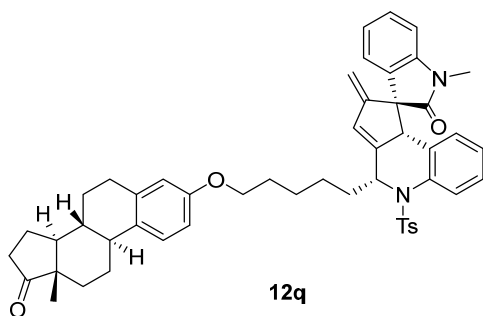

**Synthesis of 12q:** To an oven-dried 10 mL Schlenk tube equipped with a magnetic stirring bar were added *tert*-butyl (10-(((8*S*,9*R*,13*R*,14*R*)-13-methyl-17-oxo-7,8,9,11,12,13,14,15,16,17-decahydro-6*H*-cyclopenta[*a*]phenanthrene-3-yl)oxy)dec-1-en-3-yn-5-yl) carbonate **10n** (104.2 mg, 0.2001 mmol), (*E*)-4-methyl-*N*-(2-((1-methyl-

2-oxoindolin-3-ylidene)methyl)phenyl)benzenesulfonamide **11a** (40.4 mg, 0.0999 mmol, 1.0 equiv), Pd<sub>2</sub>dba<sub>3</sub> (4.6 mg, 0.0050 mmol, 5 mol%), **L5** (4.6 mg, 0.012 mmol, 12 mol%) and KHCO<sub>3</sub> (12.0 mg,



0.120 mmol, 1.2 equiv). The tube was capped, evacuated and back-filled with argon for five times. Then degassed dry MeCN (1.0 mL) was added via syringe. The mixture was stirred at 45 °C for 72 h, and monitored by TLC (EtOAc/petroleum ether = 1/5). After completion, the solvent was evaporated in vacuo. The residue was purified by flash chromatography on silica gel (EtOAc/petroleum ether = 1/5) to give the product **12q**: 56.6 mg (0.0701 mmol), as a white solid, 70% yield; mp 133–134 °C; >19:1 dr, determined by <sup>1</sup>H NMR analysis of crude product; [ $\alpha_D^{25}$ ] = –88.5 (*c* = 7.54 in CHCl<sub>3</sub>); <sup>1</sup>H NMR (400 MHz, CDCl<sub>3</sub>):  $\delta$  (ppm) 7.61 (d, *J* = 8.0 Hz, 1H), 7.31–7.27 (m, 2H), 7.23–7.09 (m, 5H), 6.88 (d, *J* = 8.0 Hz, 1H), 6.80–6.69 (m, 3H), 6.69–6.64 (m, 1H), 6.57 (d, *J* = 7.6 Hz, 1H), 6.03 (s, 1H), 5.73 (d, *J* = 7.6 Hz, 1H), 5.36 (t, *J* = 7.6 Hz, 1H), 4.71 (s, 1H), 4.37 (s, 1H), 3.97 (t, *J* = 6.0 Hz, 2H), 3.32 (s, 3H), 2.97 (s, 1H), 2.95–2.85 (m, 2H), 2.46 (s, 3H), 2.41–2.35 (m, 1H), 2.28–1.94 (m, 5H), 1.89–1.77 (m, 2H), 1.77–1.44 (m, 13H), 0.91 (s, 3H); <sup>13</sup>C NMR (100 MHz, CDCl<sub>3</sub>):  $\delta$  (ppm) 221.0, 176.7, 157.1, 155.0, 153.4, 144.9, 142.5, 137.7, 135.8, 134.2, 132.4, 131.9, 131.7, 129.8, 129.6, 128.1, 126.8, 126.63, 126.58, 126.3, 126.2, 124.4, 122.7, 122.5, 114.6, 112.2, 108.5, 103.4, 67.8, 61.6, 56.6, 50.4, 50.1, 48.1, 44.0, 38.4, 38.3, 35.9, 31.6, 29.7, 29.3, 26.7, 26.6, 26.0, 25.8, 25.6, 21.7, 21.6, 13.9; HRMS (ESI-TOF) *m/z*: [M + Na]<sup>+</sup> Calcd for C<sub>51</sub>H<sub>54</sub>N<sub>2</sub>O<sub>5</sub>SNa<sup>+</sup> 829.3646; Found 829.3645.

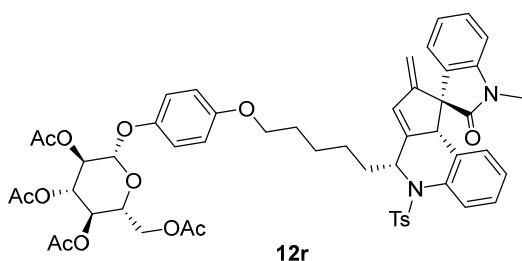

**12r**

**Synthesis of 12r:** To an oven-dried 10 mL Schlenk tube equipped with a magnetic stirring bar were added (2*R*,3*R*,4*S*,5*R*,6*S*)-2-(acetoxymethyl)-6-(4-((6-((*tert*-butoxycarbonyl)oxy)dec-9-en-7-yn-1-yl)oxy)phenoxy)tetrahydro-2*H*-pyran-3,4,5-triyl triacetate **10o** (138.2 mg,

0.2000 mmol), (*E*)-4-methyl-*N*-(2-(((1-methyl-2-oxindolin-3-ylidene)methyl)phenyl)benzenesulfonamide **11a** (40.4 mg, 0.0999 mmol, 1.0 equiv), Pd<sub>2</sub>dba<sub>3</sub> (4.6 mg, 0.0050 mmol, 5 mol%), **L5** (4.6 mg, 0.012 mmol, 12 mol%) and KHCO<sub>3</sub> (12.0 mg, 0.120 mmol, 1.2 equiv). The tube was capped, evacuated and back-filled with argon for five times. Then degassed dry MeCN (1.0 mL) was added via syringe. The mixture was stirred at 45 °C for 72 h, and monitored by TLC (EtOAc/petroleum ether = 1/5). After completion, the solvent was evaporated in vacuo. The residue was purified by flash chromatography on silica gel (EtOAc/petroleum ether = 1/5) to give the product **12r**: 65.6 mg (0.0671 mmol), as a white solid, 67% yield; mp 126–128 °C; >19:1 dr, determined by <sup>1</sup>H NMR analysis of

crude product;  $[\alpha_D^{25}] = -54.6$  ( $c = 8.65$  in  $\text{CHCl}_3$ );  $^1\text{H NMR}$  (400 MHz,  $\text{CDCl}_3$ ):  $\delta$  (ppm) 7.61 (d,  $J = 8.0$  Hz, 1H), 7.31–7.28 (m, 1H), 7.22–7.16 (m, 3H), 7.15–7.10 (m, 1H), 6.96–6.79 (m, 6H), 6.78–6.71 (m, 2H), 6.56 (d,  $J = 7.6$  Hz, 1H), 6.03 (s, 1H), 5.73 (d,  $J = 7.6$  Hz, 1H), 5.37 (t,  $J = 7.2$  Hz, 1H), 5.31–5.24 (m, 2H), 5.17 (t,  $J = 9.6$  Hz, 1H), 4.96 (d,  $J = 7.2$  Hz, 1H), 4.71 (s, 1H), 4.38 (s, 1H), 4.32–4.28 (m, 1H), 4.19–4.14 (m, 1H), 3.95 (t,  $J = 6.4$  Hz, 2H), 3.84–3.79 (m, 1H), 3.32 (s, 3H), 2.96 (s, 1H), 2.46 (s, 3H), 2.09 (d,  $J = 2.0$  Hz, 6H), 2.04 (d,  $J = 3.6$  Hz, 6H), 1.87–1.79 (m, 2H), 1.75–1.53 (m, 6H);  $^{13}\text{C NMR}$  (100 MHz,  $\text{CDCl}_3$ ):  $\delta$  (ppm) 176.7, 170.7, 170.3, 169.5, 169.4, 155.3, 155.0, 153.4, 150.8, 145.0, 142.5, 135.7, 134.2, 132.4, 131.6, 129.8, 129.6, 128.2, 126.8, 126.7, 126.5, 126.2, 124.4, 122.7, 122.4, 118.7, 115.2, 108.6, 103.4, 100.3, 72.8, 71.9, 71.2, 68.32, 68.29, 61.9, 61.6, 56.5, 50.0, 38.3, 29.2, 26.7, 25.7, 25.5, 21.7, 20.8, 20.73, 20.68, 20.65; HRMS (ESI-TOF)  $m/z$ :  $[\text{M} + \text{Na}]^+$  Calcd for  $\text{C}_{53}\text{H}_{56}\text{N}_2\text{O}_{14}\text{SNa}^+$  999.3344; Found 999.3341.

## 6. Transformations of 1-aryl-4-alken-2-ynyl carbonates

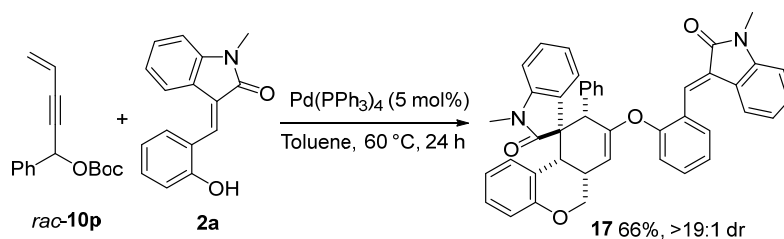

To an oven-dried 10 mL Schlenk tube equipped with a magnetic stirring bar were added *tert*-butyl (1-phenylpent-4-en-2-yn-1-yl) carbonate **10p** (51.7 mg, 0.200 mmol, 2.0 equiv), (*E*)-3-(2-hydroxybenzylidene)-1-methylindolin-2-one **2a** (25.1 mg, 0.0999 mmol, 1.0 equiv) and  $\text{Pd}(\text{PPh}_3)_4$  (5.8 mg, 0.0050 mmol). The tube was capped, evacuated and back-filled with argon for five times. Then degassed dry toluene (1.0 mL) was added via syringe. The mixture was stirred at  $60^\circ\text{C}$  for 24 h, and monitored by TLC (EtOAc/petroleum ether = 1/6). After completion, the solvent was evaporated in vacuo. The residue was purified by flash chromatography on silica gel (EtOAc/petroleum ether = 1/6) to give the product **17**: 42.5 mg (0.0661 mmol), as a white solid, 66% yield; mp  $184\text{--}186^\circ\text{C}$ ;  $>19:1$  dr, determined by  $^1\text{H NMR}$  analysis of crude product;  $^1\text{H NMR}$  (400 MHz,  $\text{CDCl}_3$ ):  $\delta$  (ppm) 7.76 (s, 1H), 7.56 (d,  $J = 7.6$  Hz, 1H), 7.50 (d,  $J = 7.5$  Hz, 1H), 7.45–7.40 (m, 1H), 7.29–7.26 (m, 1H), 7.25–7.23 (m, 1H), 7.21–7.13 (m, 3H), 6.97–6.78 (m, 10H), 6.67–6.62 (m, 1H), 6.57–6.53 (m, 1H), 6.23 (d,  $J = 7.6$  Hz, 1H), 5.15–5.08 (m, 1H), 4.71 (t,  $J = 2.8$  Hz, 1H), 4.25 (t,  $J = 11.4$  Hz, 1H), 3.95 (d,  $J = 7.3$  Hz, 1H), 3.80–3.70 (m, 1H), 3.33 (s, 3H), 3.15–3.07 (m, 1H),

2.86 (s, 3H);  $^{13}\text{C}$  NMR (100 MHz,  $\text{CDCl}_3$ ):  $\delta$  (ppm) 178.7, 167.9, 154.8, 154.4, 153.3, 144.2, 144.0, 133.6, 133.2, 131.1, 130.9, 130.0, 129.9, 129.7, 128.5, 128.2, 128.1, 127.7, 127.3, 126.8, 126.6, 124.0, 122.8, 121.8, 121.2, 121.0, 120.4, 120.0, 116.9, 108.2, 107.7, 104.1, 64.9, 59.5, 50.8, 39.4, 33.7, 26.2, 26.0; HRMS (ESI-TOF)  $m/z$ :  $[\text{M} + \text{Na}]^+$  Calcd for  $\text{C}_{43}\text{H}_{34}\text{N}_2\text{O}_4\text{Na}^+$  665.2411; Found 665.2419.

A possible mechanism for the formation of **17** was proposed. Activation of 1-phenyl-substituted propargylic carbonate *rac*-**10p** by Pd(0) led to the formation of thermally more stable allenyl- $\pi$ -allyl species **Ib**, which underwent Tsuji–Trost reaction of with **2a** with distinct terminal regioselectivity. The resultant 1,2,3-butatriene intermediate **IIb** could be further HOMO-activated by Pd(0) via similar  $\pi$ -Lewis base catalysis, thus facilitated intramolecular vinylogous addition to generate  $\eta^3$ -propargylpalladium **IIIb**. Interestingly, **IIIb** was attacked by another **2a**, and subsequent protonation of **IVb** and intramolecular allylation of **Vb** provided complex **17** in a good yield with outstanding diastereo- and *E/Z*-selectivity.

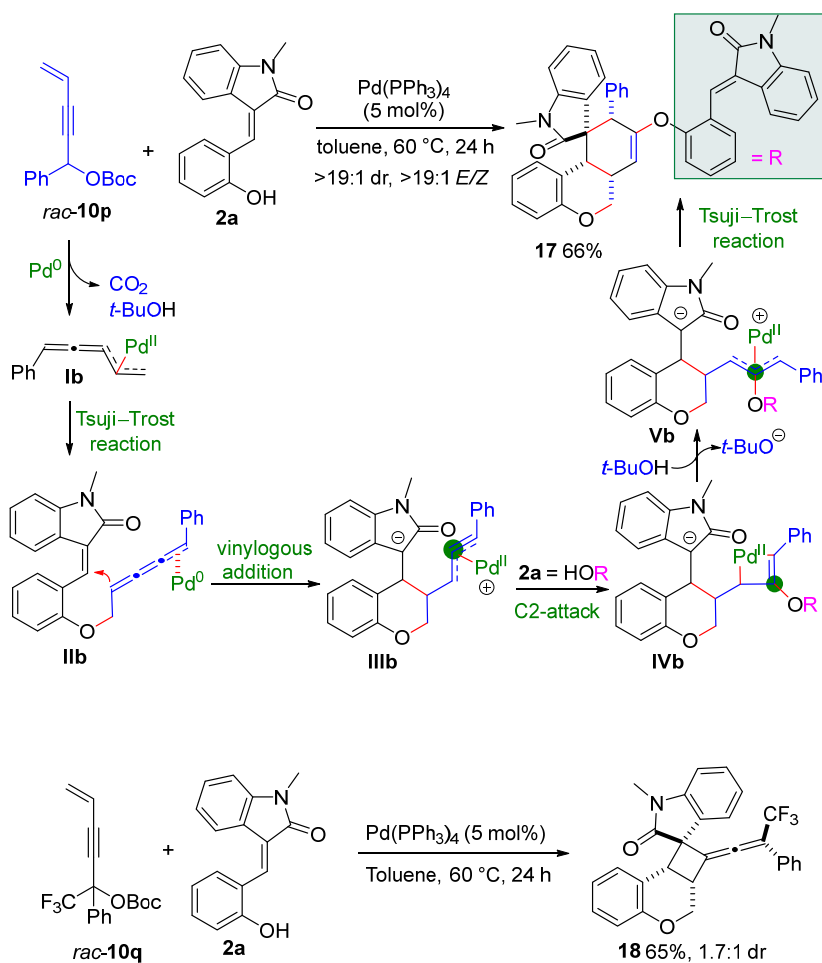

To an oven-dried 10 mL Schlenk tube equipped with a magnetic stirring bar were added *tert*-butyl (1,1,1-trifluoro-2-phenylhex-5-en-3-yn-2-yl) carbonate **10q** (65.3 mg, 0.200 mmol, 2.0 equiv), (*E*)-3-(2-hydroxybenzylidene)-1-methylindolin-2-one **2a** (25.1 mg, 0.0999 mmol, 1.0 equiv) and

Pd(PPh<sub>3</sub>)<sub>4</sub> (5.8 mg, 0.0050 mmol). The tube was capped, evacuated and back-filled with argon for five times. Then degassed dry toluene (1.0 mL) was added via syringe. The mixture was stirred at 60 °C for 24 h, and monitored by TLC (EtOAc/petroleum ether = 1/7). After completion, the solvent was evaporated in vacuo. The residue was purified by flash chromatography on silica gel EtOAc/petroleum ether = 1/7 to 1/5) to give the products **18** and **18'** as separable isomers.

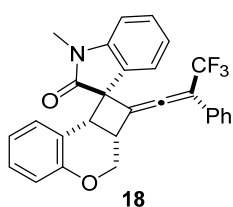

**18**: 18.9 mg (0.0411 mmol), as a white solid, 41% yield; mp 154–156 °C; <sup>1</sup>H NMR (400 MHz, CDCl<sub>3</sub>): δ (ppm) 7.48–7.41 (m, 2H), 7.34–7.26 (m, 3H), 7.24–7.19 (m, 1H), 7.13–7.05 (m, 2H), 6.79–6.71 (m, 2H), 6.56–6.49 (m, 2H), 5.88 (d, *J* = 7.6 Hz, 1H), 4.56 (d, *J* = 9.2 Hz, 1H), 4.42 (d, *J* = 12.0 Hz, 1H), 4.03–3.97 (m, 2H), 3.25 (s, 3H); <sup>13</sup>C NMR (150 MHz, CDCl<sub>3</sub>): δ (ppm) 195.5, 176.3, 155.9, 143.9, 132.1, 129.1, 128.9, 128.7, 128.6, 128.4, 127.1, 125.8, 125.2, 123.7, 122.2, 121.9, 121.6, 120.7, 117.7, 111.6, 107.8, 64.8, 59.7, 41.7, 41.5, 26.6; <sup>19</sup>F NMR (375 MHz, CDCl<sub>3</sub>): δ (ppm) –60.1; HRMS (ESI-TOF) *m/z*: [M + H]<sup>+</sup> Calcd for C<sub>28</sub>H<sub>21</sub>F<sub>3</sub>NO<sub>2</sub><sup>+</sup> 460.1519; Found 460.1523.

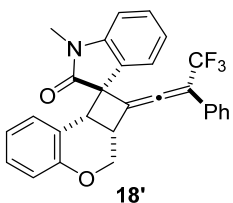

**18'**: 11.1 mg (0.0241 mmol), as a white solid, 24% yield; mp 152–154 °C; <sup>1</sup>H NMR (400 MHz, CDCl<sub>3</sub>): δ (ppm) 7.39–7.26 (m, 5H), 7.21–7.12 (m, 2H), 7.11–7.06 (m, 1H), 6.77–6.66 (m, 3H), 6.51 (d, *J* = 7.6 Hz, 1H), 6.13 (d, *J* = 7.5 Hz, 1H), 4.56–4.48 (m, 1H), 4.41 (d, *J* = 12.0 Hz, 1H), 4.06–3.94 (m, 2H), 3.24 (s, 3H); <sup>13</sup>C NMR (150 MHz, CDCl<sub>3</sub>): δ (ppm) 195.3, 176.8, 156.2, 143.6, 131.7, 129.2, 128.9, 128.8, 128.6, 128.5, 127.1, 125.8, 125.6, 123.8, 122.5, 122.0, 121.4, 120.4, 117.9, 111.6, 107.7, 64.8, 59.3, 41.8, 41.5, 26.6; <sup>19</sup>F NMR (375 MHz, CDCl<sub>3</sub>): δ (ppm) –59.7; HRMS (ESI-TOF) *m/z*: [M + Na]<sup>+</sup> Calcd for C<sub>28</sub>H<sub>20</sub>F<sub>3</sub>NO<sub>2</sub>Na<sup>+</sup> 482.1338; Found 482.1346.

The possible mechanism for the formation of **18** was proposed. (*E*)-3-(2-hydroxy benzylidene)oxindole **2a** underwent similar Tsuji–Trost reaction/vinylogous addition with **2a** efficiently through intermediates **Ic** and **IIc**, respectively, whereas the formed η<sup>1</sup>-allenylpalladium moiety of **IIIc** was intramolecularly captured by enolate to provide intriguing cyclobutane-fused chromanone **18** having a tetrasubstituted exocyclic allene motif in a moderate yield with fair diastereoselectivity

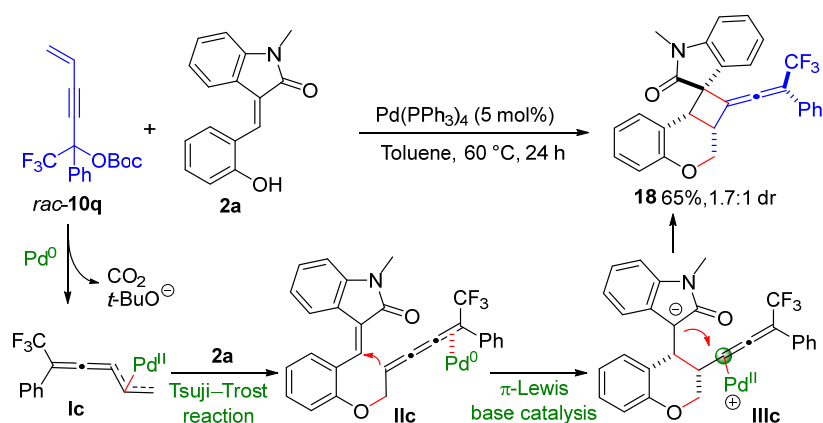

## 7. Unsuccessful substrates exploration

To further expand substrate scope, more *ortho*-functionalised activated alkenes derived from different backbones and primary carbonates were tested. Unfortunately, messy reaction profiles or no apparent conversions were generally observed, as summarised below.

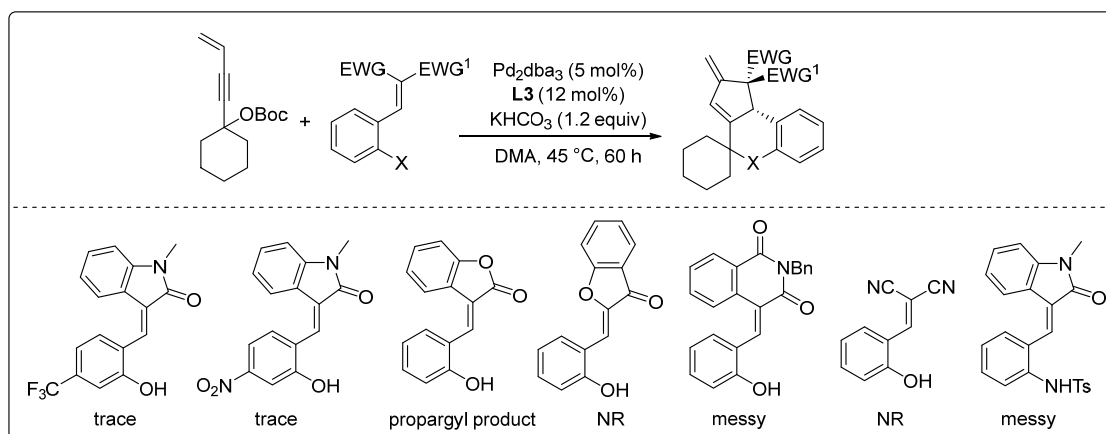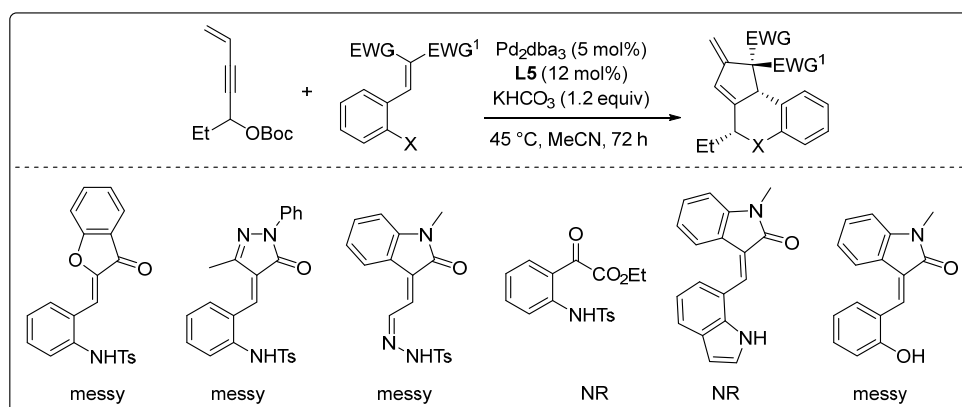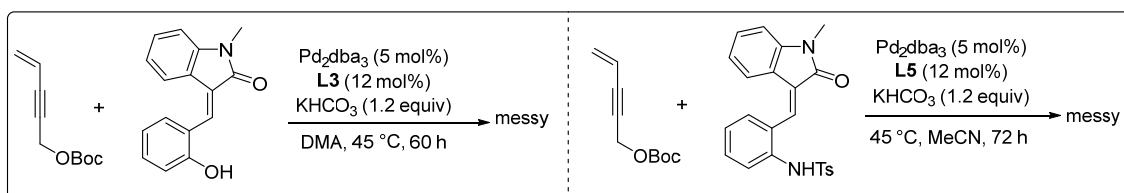

## 8. Transformations of product 12a

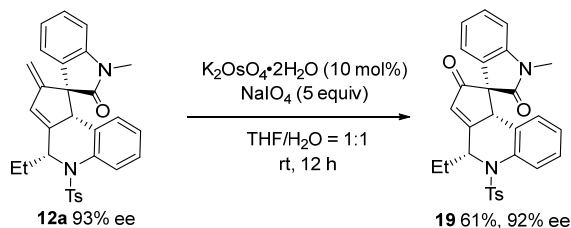

To a solution of **12a** (49.7 mg, 0.100 mmol) in THF/H<sub>2</sub>O (0.5 mL/ 0.5 mL) was added  $\text{K}_2\text{OsO}_4 \cdot 2\text{H}_2\text{O}$  (3.1 mg, 0.010 mmol) and  $\text{NaIO}_4$  (108.0 mg, 0.5002 mmol). The mixture was stirred at room temperature for 10 h, and monitored by TLC (petroleumether/EtOAc = 5/1). After complete consumption of **12a**, the mixture was quenched with saturated aqueous  $\text{Na}_2\text{SO}_3$ , and extracted with ethyl acetate (3.0 mL  $\times$  2). The combined organic layers were washed with brine, dried over  $\text{Na}_2\text{SO}_4$ , filtered, and concentrated in vacuo. The residue was purified by flash chromatography on silica gel (petroleumether/EtOAc = 5/1) to afford product **19**: 30.5 mg (0.0612 mmol), as a white solid, 61% yield; mp 235–237 °C; >19:1 dr, determined by <sup>1</sup>H NMR analysis of crude product;  $[\alpha]_D^{25} = -158.4$  ( $c = 6.88$  in  $\text{CHCl}_3$ ); 92% ee, determined by HPLC analysis (Daicel Chiralpak AD, *n*-hexane/*i*-PrOH = 60/40, flow rate = 1.0 mL/min,  $\lambda = 254$  nm)  $t_R = 6.85$  min (minor),  $t_R = 11.40$  min (major); <sup>1</sup>H NMR (400 MHz,  $\text{CDCl}_3$ ):  $\delta$  (ppm) 7.68 (d,  $J = 8.0$  Hz, 1H), 7.35–7.29 (m, 2H), 7.26–7.14 (m, 4H), 6.91 (d,  $J = 8.0$  Hz, 1H), 6.84 (t,  $J = 7.6$  Hz, 1H), 6.76 (t,  $J = 7.6$  Hz, 1H), 6.35 (d,  $J = 7.6$  Hz, 1H), 6.01 (s, 1H), 5.78 (d,  $J = 7.6$  Hz, 1H), 5.52–5.42 (m, 1H), 3.30 (s, 3H), 3.08 (s, 1H), 2.47 (s, 3H), 1.82–1.72 (m, 1H), 1.67–1.62 (m, 1H), 1.23 (t,  $J = 7.2$  Hz, 3H); <sup>13</sup>C NMR (100 MHz,  $\text{CDCl}_3$ ):  $\delta$  (ppm) 198.7, 183.2, 172.7, 145.6, 144.3, 135.6, 134.4, 130.2, 129.74, 129.67, 129.0, 127.6, 127.1, 126.7, 126.4, 125.1, 123.6, 122.9, 122.4, 109.1, 66.5, 59.0, 46.6, 31.2, 26.8, 21.7, 10.9; HRMS (ESI-TOF)  $m/z$ :  $[\text{M} + \text{Na}]^+$  Calcd for  $\text{C}_{29}\text{H}_{26}\text{N}_2\text{O}_4\text{SNa}^+$  521.1505; Found 521.1509.

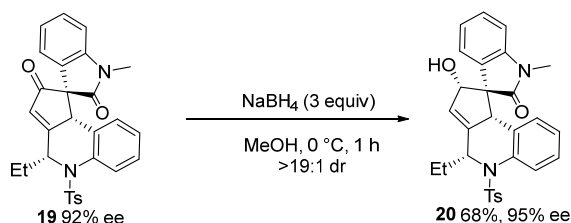

To a solution of **19** (30.5 mg, 0.0612 mmol) in MeOH (0.5 mL) was added  $\text{NaBH}_4$  (7.0 mg, 0.185 mmol) at 0 °C. The mixture was stirred at 0 °C for 1 h, and monitored by TLC (petroleumether/EtOAc = 3/1). After complete consumption of **19**, the mixture was quenched with

water, and extracted with ethyl acetate (3.0 mL × 2). The combined organic layers were washed with brine, dried over Na<sub>2</sub>SO<sub>4</sub>, filtered, and concentrated in vacuo. The residue was purified by flash chromatography on silica gel (petroleum ether/EtOAc = 3/1) to afford product **20**: 23.3 mg (0.0416 mmol), as a white solid, 68% yield; mp 178–180 °C; >19:1 dr, determined by <sup>1</sup>H NMR analysis of crude product; [ $\alpha_D^{25}$ ] = –190.5 (*c* = 3.54 in CHCl<sub>3</sub>); 95% ee, determined by HPLC analysis (Daicel Chiralpak AD, *n*-hexane/*i*-PrOH = 60/40, flow rate = 1.0 mL/min,  $\lambda$  = 254 nm) *t*<sub>R</sub> = 4.68 min (minor), *t*<sub>R</sub> = 12.62 min (major); <sup>1</sup>H NMR (400 MHz, CDCl<sub>3</sub>):  $\delta$  (ppm) 7.56 (d, *J* = 7.6 Hz, 1H), 7.36–7.30 (m, 2H), 7.26–7.18 (m, 3H), 7.15–7.08 (m, 1H), 6.89 (d, *J* = 8.0 Hz, 1H), 6.83–6.74 (m, 3H), 5.79 (d, *J* = 8.0 Hz, 1H), 5.52 (s, 1H), 5.12–5.05 (m, 1H), 4.93 (d, *J* = 11.2 Hz, 1H), 3.28 (s, 3H), 2.62 (s, 1H), 2.52 (s, 3H), 1.60–1.45 (m, 2H), 1.40–1.33 (m, 1H), 1.15 (t, *J* = 7.2 Hz, 3H); <sup>13</sup>C NMR (100 MHz, CDCl<sub>3</sub>):  $\delta$  (ppm) 176.8, 147.5, 145.0, 144.7, 136.0, 134.1, 133.1, 129.9, 129.8, 129.2, 127.0, 126.8, 126.7, 125.1, 124.8, 124.5, 123.9, 122.3, 108.7, 83.7, 65.6, 57.4, 47.6, 30.8, 26.7, 21.7, 10.8; HRMS (ESI-TOF) *m/z*: [M + Na]<sup>+</sup> Calcd for C<sub>29</sub>H<sub>28</sub>N<sub>2</sub>O<sub>4</sub>SNa<sup>+</sup> 523.1662; Found 523.1672.

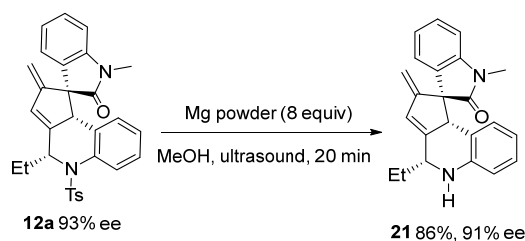

To a solution of **12a** (49.7 mg, 0.100 mmol) in MeOH (1.0 mL) was added Mg powder (19.5 mg, 0.802 mmol), and the resultant mixture was sonicated for 20 minutes. After complete consumption of **12a**, the mixture was quenched with water, and extracted with ethyl acetate (3.0 mL × 2). The combined organic layers were washed with brine, dried over Na<sub>2</sub>SO<sub>4</sub>, filtered, and concentrated in vacuo. The residue was purified by flash chromatography on silica gel (petroleum ether/EtOAc = 5/1) to afford product **21**: 29.5 mg (0.0861 mmol), as a white solid, 86% yield; mp 132–134 °C; >19:1 dr, determined by <sup>1</sup>H NMR analysis of crude product; [ $\alpha_D^{25}$ ] = –232.5 (*c* = 4.67 in CHCl<sub>3</sub>); 91% ee, determined by HPLC analysis (Daicel Chiralpak AD, *n*-hexane/*i*-PrOH = 80/20, flow rate = 1.0 mL/min,  $\lambda$  = 254 nm) *t*<sub>R</sub> = 6.84 min (minor), *t*<sub>R</sub> = 8.78 min (major); <sup>1</sup>H NMR (400 MHz, CDCl<sub>3</sub>):  $\delta$  (ppm) 7.13–7.04 (m, 1H), 6.83–6.74 (m, 2H), 6.72–6.64 (m, 2H), 6.49 (d, *J* = 7.6 Hz, 1H), 6.29–6.23 (m, 1H), 6.17 (s, 1H), 6.08 (d, *J* = 7.6 Hz, 1H), 4.93 (s, 1H), 4.80 (s, 1H), 4.51 (s, 1H), 3.97–3.80 (m, 2H), 3.38 (s, 3H), 2.10–1.98 (m, 1H), 1.82–1.72 (m, 1H), 1.15 (t, *J* = 7.2 Hz, 3H); <sup>13</sup>C NMR (100 MHz, CDCl<sub>3</sub>):  $\delta$  (ppm) 179.0, 156.3, 150.8, 145.0, 142.7, 132.6, 128.0, 127.6,

127.0, 123.6, 123.0, 122.7, 120.6, 118.2, 114.9, 108.0, 104.6, 63.2, 53.9, 53.3, 26.8, 26.1, 10.4; HRMS (ESI-TOF)  $m/z$ :  $[M + H]^+$  Calcd for  $C_{23}H_{23}N_2O^+$  343.1805; Found 343.1809.

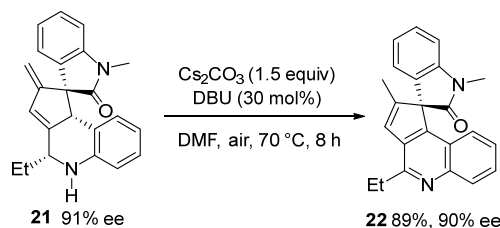

To a solution of **21** (29.5 mg, 0.0861 mmol) in DMF (0.8 mL) was added  $\text{Cs}_2\text{CO}_3$  (42.1 mg, 0.129 mmol) and DBU (4.0 mg, 0.026 mmol). The mixture was stirred at 70 °C for 8 h and monitored by TLC (petroleumether/EtOAc = 6/1). After complete consumption of **21**, the mixture was quenched with water, and extracted with ethyl acetate (3.0 mL  $\times$  3). The combined organic layers were washed with brine, dried over  $\text{Na}_2\text{SO}_4$ , filtered, and concentrated in vacuo. The residue was purified by flash chromatography on silica gel (petroleumether/EtOAc = 6/1) to afford product **22**: 26.1 mg (0.0767 mmol), as a white solid, 89% yield; mp 105–107 °C;  $[\alpha_D^{25}] = -57.3$  ( $c = 4.89$  in  $\text{CHCl}_3$ ); 90% ee, determined by HPLC analysis (Daicel Chiralpak AD,  $n$ -hexane/ $i$ -PrOH = 80/20, flow rate = 1.0 mL/min,  $\lambda = 254$  nm)  $t_R = 5.98$  min (minor),  $t_R = 13.51$  min (major);  $^1\text{H}$  NMR (400 MHz,  $\text{CDCl}_3$ ):  $\delta$  (ppm) 8.02 (d,  $J = 8.8$  Hz, 1H), 7.50–7.43 (m, 1H), 7.42–7.37 (m, 1H), 7.20–7.15 (m, 1H), 7.10 (d,  $J = 8.0$  Hz, 1H), 7.00–6.94 (m, 1H), 6.91–6.88 (m, 1H), 6.85 (d,  $J = 8.0$  Hz, 1H), 6.65 (d,  $J = 7.6$  Hz, 1H), 3.46 (s, 3H), 3.16 (q,  $J = 7.6, 7.6$  Hz, 2H), 1.79 (s, 3H), 1.47 (t,  $J = 7.6$  Hz, 3H);  $^{13}\text{C}$  NMR (100 MHz,  $\text{CDCl}_3$ ):  $\delta$  (ppm) 173.7, 157.3, 148.9, 148.4, 146.7, 144.7, 138.3, 129.8, 129.2, 127.8, 127.8, 127.4, 126.4, 123.6, 123.5, 123.1, 121.4, 108.9, 68.4, 29.9, 27.2, 13.7, 12.9; HRMS (ESI-TOF)  $m/z$ :  $[M + H]^+$  Calcd for  $C_{23}H_{21}N_2O^+$  341.1648; Found 341.1652.

It should be noted that the oxindole-fused polycyclic products and their derivatives are core structural subunits of many bioactive natural products and drug candidates, as briefly exemplified below.

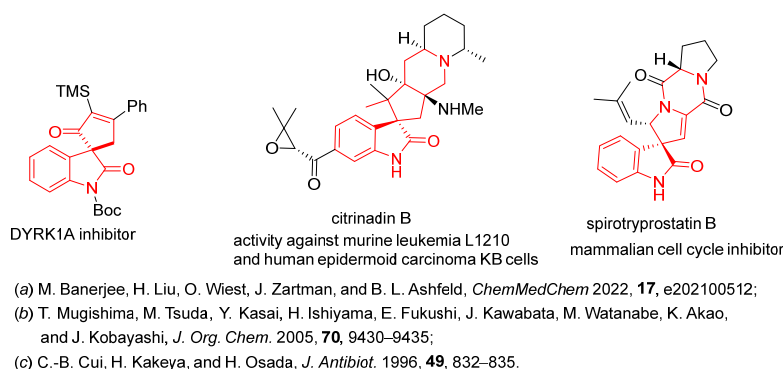

FigureS1. Selected bioactive spirooxindoles



## 9. Preliminary mechanism investigation

### 9.1 Kinetic studies of the reaction between 10a and 11a

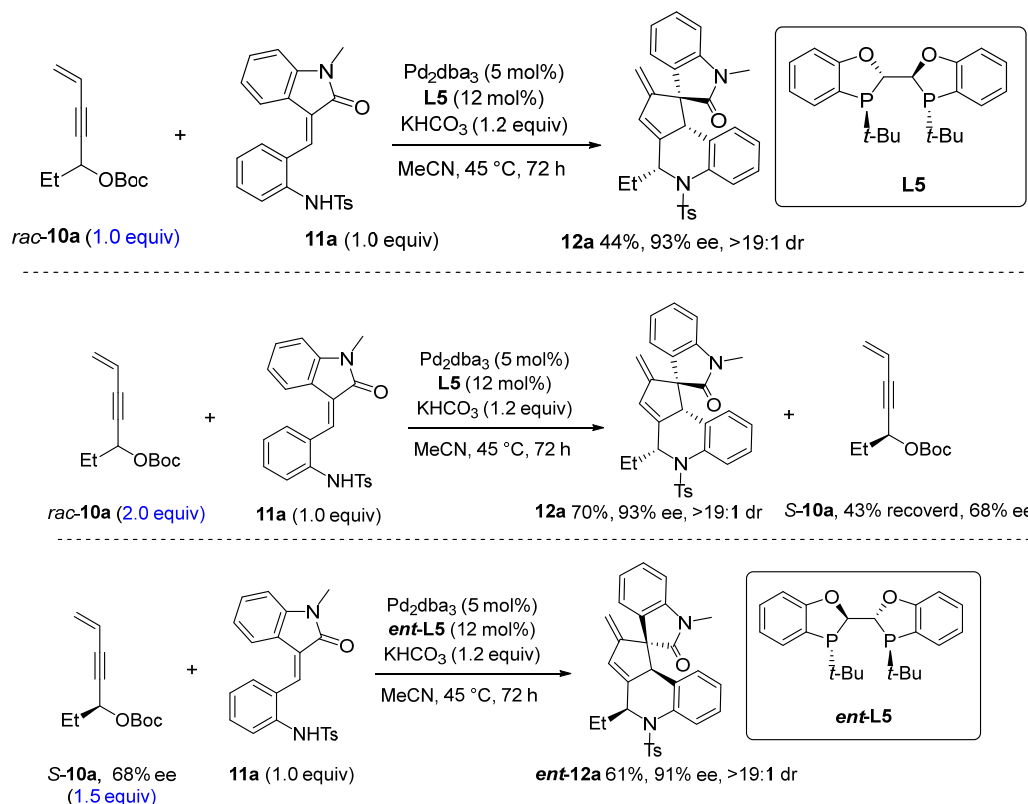

The reaction of *rac*-10a (1.0 equiv) with (2-aminobenzylidene)oxindole 11a delivered product 12a in 44% yield under standard conditions, while a significantly improved yield was attained by increasing the amounts of *rac*-10a (2.0 equiv). Meanwhile, *S*-10a was recovered in 43% yield with 68% ee. In addition, the reaction of optically active (*S*)-10a under the standard conditions with *ent*-L5 as ligand afforded product *ent*-12a in 61% yield with 91% ee. These results indicated that a kinetic resolution process of *rac*-10a was involved in current tandem transformations.

### 9.2 Elucidation of the origin of regioselectivity

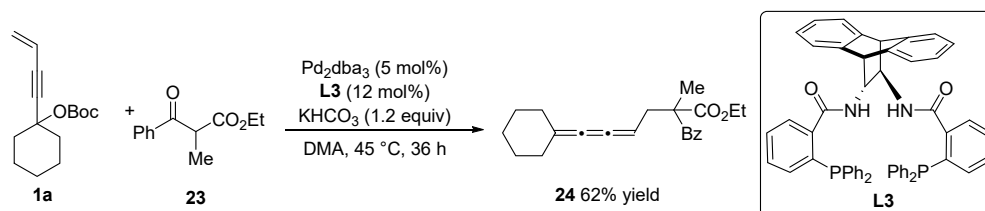

To shed some light on the origin of the unusual regioselectivity and the complicated reaction process, some control experiments were conducted. As depicted above, the assembly of 4-alken-2-ynyl carbonate 1a with carbon-centered nucleophile β-ketoesters 23 delivered 1,2,3-butatriene product 24 under the standard conditions, which indicated that the regioselectivity for substitution was governed by the nucleophiles.

### 9.3 Elucidation of the reaction pathway

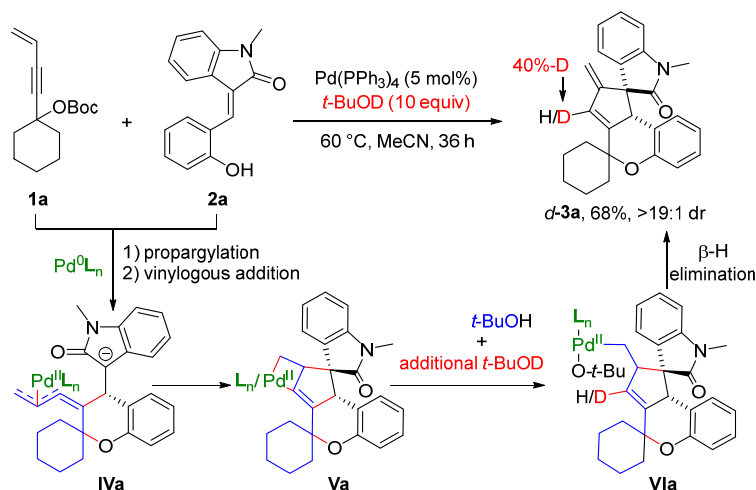

Moreover, adding *t*-BuOD to the reaction mixture led to product *d*-**3a** with 40% deuterium incorporated into *endo*-cyclic double bond, as outlined above. As nucleophilic attack on the central carbon of  $\pi$ -allylpalladium had been documented (*JACS* **2007**, *129*, 14866; *JACS* **2010**, *132*, 7508; *Org. Lett.* **2024**, *26*, 5782), this result further indicated that the key palladacyclobutane **Va** indeed be involved in the reaction process.

#### Procedure for deuterium labeling experiments

To an oven-dried 10 mL Schlenk tube equipped with a magnetic stirring bar were added 1-(but-3-en-1-yn-1-yl)cyclohexyl *tert*-butyl carbonate **1a** (37.6 mg, 0.150 mmol, 1.5 equiv), (*E*)-3-(2-hydroxybenzylidene)-1-methylindolin-2-one **2a** (25.1 mg, 0.0999 mmol, 1.0 equiv), Pd(PPh<sub>3</sub>)<sub>4</sub> (5.8 mg, 0.0050 mmol) and *t*-BuOD (75.1 mg, 1.00 mmol). The tube was capped, evacuated and back-filled with argon for five times. Then degassed dry MeCN (2.0 mL) was added via syringe. The mixture was stirred at 60 °C for 36 h, and monitored by TLC (EtOAc/petroleum ether = 1/6). After completion, the solvent was evaporated in vacuo. The residue was purified by flash chromatography on silica gel (EtOAc/petroleum ether = 1/6) to give the product *d*-**3a**: 26.1 mg (0.0681 mmol), as a white solid, 68% yield; 40%-D; <sup>1</sup>H NMR (400 MHz, CDCl<sub>3</sub>):  $\delta$  (ppm) 7.12–7.05 (m, 1H), 6.94–6.88 (m, 1H), 6.84–6.75 (m, 2H), 6.69–6.60 (m, 2H), 6.48–6.41 (m, 1H), 6.24 (d, *J* = 2.8 Hz, 0.6H), 6.17 (d, *J* = 7.6 Hz, 1H), 4.96 (s, 1H), 4.76 (s, 1H), 4.55 (s, 1H), 3.40 (s, 3H), 2.13–2.05 (m, 1H), 2.05–1.93 (m, 3H), 1.81–1.68 (m, 2H), 1.59–1.31 (m, 4H).

## 10. Crystal data and structural refinement

**Procedure for the recrystallization of 3o:** To a 10 mL tube containing enantiopure **3o** (32 mg) were added *n*-hexane (0.3 mL) and EtOAc (1.4 mL). The mixture was heated until a clear solution was formed, which was kept aside at room temperature to obtain crystals. The crystals were subjected for single crystal XRD to determine the absolute configuration of **3o**. The data were collected by an Bruker D8 Venture equipped with a Cu radiation source ( $K\alpha = 1.54178 \text{ \AA}$ ) at 273.0 K. CCDC 2381131 (**3o**) contains the supplementary crystallographic data for this paper. These data can be obtained free of charge via [www.ccdc.cam.ac.uk/data\\_request/cif](http://www.ccdc.cam.ac.uk/data_request/cif).

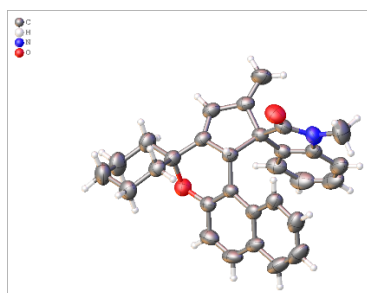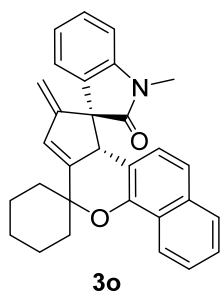

|                                               |                                            |
|-----------------------------------------------|--------------------------------------------|
| Identification code                           | <b>3o</b>                                  |
| Empirical formula                             | $C_{30}H_{27}NO_2$                         |
| Formula weight                                | 433.52                                     |
| Temperature/K                                 | 273.0                                      |
| Crystal system                                | monoclinic                                 |
| Space group                                   | $P2_1$                                     |
| $a/\text{\AA}$                                | 8.6278(4)                                  |
| $b/\text{\AA}$                                | 12.3083(6)                                 |
| $c/\text{\AA}$                                | 10.9519(5)                                 |
| $\alpha/^\circ$                               | 90                                         |
| $\beta/^\circ$                                | 95.711(3)                                  |
| $\gamma/^\circ$                               | 90                                         |
| Volume/ $\text{\AA}^3$                        | 1157.25(9)                                 |
| $Z$                                           | 2                                          |
| $\rho_{\text{calc}}/\text{cm}^3$              | 1.244                                      |
| $\mu/\text{mm}^{-1}$                          | 0.604                                      |
| $F(000)$                                      | 460.0                                      |
| Crystal size/ $\text{mm}^3$                   | $0.38 \times 0.25 \times 0.1$              |
| Radiation                                     | $\text{CuK}\alpha$ ( $\lambda = 1.54178$ ) |
| $2\theta$ range for data collection/ $^\circ$ | 8.112 to 140.378                           |

|                                             |                                                               |
|---------------------------------------------|---------------------------------------------------------------|
| Index ranges                                | -10 ≤ h ≤ 10, -15 ≤ k ≤ 14, -13 ≤ l ≤ 12                      |
| Reflections collected                       | 7672                                                          |
| Independent reflections                     | 3988 [R <sub>int</sub> = 0.0402, R <sub>sigma</sub> = 0.0528] |
| Data/restraints/parameters                  | 3988/1/300                                                    |
| Goodness-of-fit on F <sup>2</sup>           | 1.077                                                         |
| Final R indexes [I ≥ 2σ (I)]                | R <sub>1</sub> = 0.0380, wR <sub>2</sub> = 0.0971             |
| Final R indexes [all data]                  | R <sub>1</sub> = 0.0437, wR <sub>2</sub> = 0.1013             |
| Largest diff. peak/hole / e Å <sup>-3</sup> | 0.16/-0.12                                                    |
| Flack parameter                             | -0.01(18)                                                     |

**Procedure for the recrystallization of 12g:** To a 10 mL tube containing enantiopure **12g** (45 mg) were added *n*-hexane (0.5 mL) and EtOAc (1.5 mL). The mixture was heated until a clear solution was formed, which was kept aside at room temperature to obtain crystals. The crystals were subjected for single crystal XRD to determine the absolute configuration of **12g**. The data were collected by an Bruker D8 Venture equipped with a Mo radiation source (Kα = 0.71073 Å) at 303.0 K. CCDC 2381132 (**12g**) contains the supplementary crystallographic data for this paper. These data can be obtained free of charge via [www.ccdc.cam.ac.uk/data\\_request/cif](http://www.ccdc.cam.ac.uk/data_request/cif).

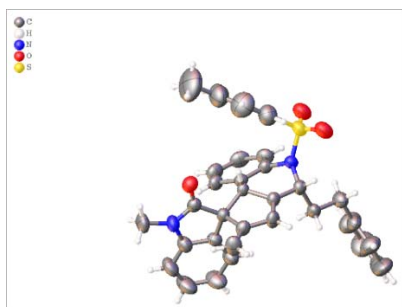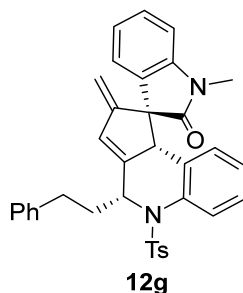

|                     |                                                                 |
|---------------------|-----------------------------------------------------------------|
| Identification code | <b>12g</b>                                                      |
| Empirical formula   | C <sub>36</sub> H <sub>32</sub> N <sub>2</sub> O <sub>3</sub> S |
| Formula weight      | 572.69                                                          |
| Temperature/K       | 303.0                                                           |
| Crystal system      | tetragonal                                                      |
| Space group         | P4 <sub>3</sub> 2 <sub>1</sub> 2                                |
| a/Å                 | 12.4257(6)                                                      |
| b/Å                 | 12.4257(6)                                                      |
| c/Å                 | 42.988(4)                                                       |
| α/°                 | 90                                                              |
| β/°                 | 90                                                              |

|                                               |                                                               |
|-----------------------------------------------|---------------------------------------------------------------|
| $\gamma/^\circ$                               | 90                                                            |
| Volume/ $\text{\AA}^3$                        | 6637.3(9)                                                     |
| Z                                             | 8                                                             |
| $\rho_{\text{calc}}/\text{cm}^3$              | 1.146                                                         |
| $\mu/\text{mm}^{-1}$                          | 0.133                                                         |
| F(000)                                        | 2416.0                                                        |
| Crystal size/ $\text{mm}^3$                   | $0.48 \times 0.42 \times 0.26$                                |
| Radiation                                     | MoK $\alpha$ ( $\lambda = 0.71073$ )                          |
| $2\Theta$ range for data collection/ $^\circ$ | 3.786 to 54.894                                               |
| Index ranges                                  | $-12 \leq h \leq 15, -16 \leq k \leq 11, -55 \leq l \leq 41$  |
| Reflections collected                         | 22897                                                         |
| Independent reflections                       | 7524 [ $R_{\text{int}} = 0.0566, R_{\text{sigma}} = 0.0770$ ] |
| Data/restraints/parameters                    | 7524/7/381                                                    |
| Goodness-of-fit on $F^2$                      | 0.985                                                         |
| Final R indexes [ $I \geq 2\sigma(I)$ ]       | $R_1 = 0.0542, wR_2 = 0.1043$                                 |
| Final R indexes [all data]                    | $R_1 = 0.1202, wR_2 = 0.1296$                                 |
| Largest diff. peak/hole / $e \text{\AA}^{-3}$ | 0.14/-0.21                                                    |
| Flack parameter                               | 0.00(6)                                                       |

**Procedure for the recrystallization of 17:** To a 10 mL tube containing racemic **17** (48 mg) were added *n*-hexane (0.5 mL) and EtOAc (1.5 mL). The mixture was heated until a clear solution was formed, which was kept aside at room temperature to obtain crystals. The crystals were subjected for single crystal XRD to determine the relative configuration of **17**. The data were collected by an Bruker D8 Venture equipped with a Mo radiation source ( $K\alpha = 0.71073 \text{ \AA}$ ) at 304.0 K. CCDC 2381133 (**17**) contains the supplementary crystallographic data for this paper. These data can be obtained free of charge via [www.ccdc.cam.ac.uk/data\\_request/cif](http://www.ccdc.cam.ac.uk/data_request/cif).

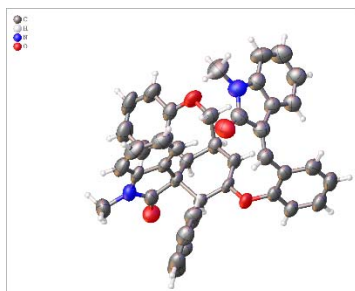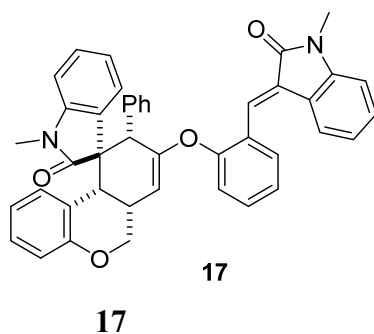

|                                             |                                                               |
|---------------------------------------------|---------------------------------------------------------------|
| Identification code                         |                                                               |
| Empirical formula                           | C <sub>43</sub> H <sub>34</sub> N <sub>2</sub> O <sub>4</sub> |
| Formula weight                              | 642.72                                                        |
| Temperature/K                               | 304.0                                                         |
| Crystal system                              | monoclinic                                                    |
| Space group                                 | C2/c                                                          |
| a/Å                                         | 21.731(4)                                                     |
| b/Å                                         | 9.1510(15)                                                    |
| c/Å                                         | 34.748(7)                                                     |
| α/°                                         | 90                                                            |
| β/°                                         | 107.204(9)                                                    |
| γ/°                                         | 90                                                            |
| Volume/Å <sup>3</sup>                       | 6601(2)                                                       |
| Z                                           | 8                                                             |
| ρ <sub>calc</sub> /cm <sup>3</sup>          | 1.293                                                         |
| μ/mm <sup>-1</sup>                          | 0.083                                                         |
| F(000)                                      | 2704.0                                                        |
| Crystal size/mm <sup>3</sup>                | 0.12 × 0.07 × 0.05                                            |
| Radiation                                   | MoKα (λ = 0.71073)                                            |
| 2θ range for data collection/°              | 3.924 to 49.98                                                |
| Index ranges                                | -25 ≤ h ≤ 25, -10 ≤ k ≤ 10, -41 ≤ l ≤ 41                      |
| Reflections collected                       | 34640                                                         |
| Independent reflections                     | 5737 [R <sub>int</sub> = 0.1452, R <sub>sigma</sub> = 0.1134] |
| Data/restraints/parameters                  | 5737/0/445                                                    |
| Goodness-of-fit on F <sup>2</sup>           | 1.025                                                         |
| Final R indexes [I ≥ 2σ (I)]                | R <sub>1</sub> = 0.0831, wR <sub>2</sub> = 0.1892             |
| Final R indexes [all data]                  | R <sub>1</sub> = 0.1959, wR <sub>2</sub> = 0.2470             |
| Largest diff. peak/hole / e Å <sup>-3</sup> | 0.24/-0.25                                                    |

**Procedure for the recrystallization of 18:** To a 10 mL tube containing racemic **18** (42 mg) were added *n*-hexane (0.5 mL) and EtOAc (1.4 mL). The mixture was heated until a clear solution was formed, which was kept aside at room temperature to obtain crystals. The crystals were subjected for single crystal XRD to determine the relative configuration of **18**. The data were collected by an Bruker

D8 Venture equipped with a Mo radiation source ( $K\alpha = 0.71073 \text{ \AA}$ ) at 227.0 K. CCDC 2381134 (**18**) contains the supplementary crystallographic data for this paper. These data can be obtained free of charge via [www.ccdc.cam.ac.uk/data\\_request/cif](http://www.ccdc.cam.ac.uk/data_request/cif).

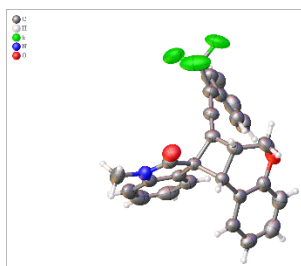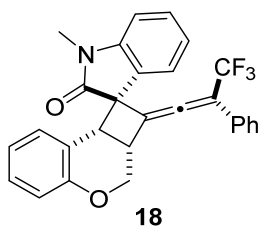

|                                               |                                                               |
|-----------------------------------------------|---------------------------------------------------------------|
| Identification code                           | <b>18</b>                                                     |
| Empirical formula                             | $C_{28}H_{20}F_3NO_2$                                         |
| Formula weight                                | 459.45                                                        |
| Temperature/K                                 | 227.0                                                         |
| Crystal system                                | triclinic                                                     |
| Space group                                   | P-1                                                           |
| a/ $\text{\AA}$                               | 9.9196(10)                                                    |
| b/ $\text{\AA}$                               | 9.9973(9)                                                     |
| c/ $\text{\AA}$                               | 11.8824(11)                                                   |
| $\alpha/^\circ$                               | 91.791(4)                                                     |
| $\beta/^\circ$                                | 104.104(4)                                                    |
| $\gamma/^\circ$                               | 102.384(3)                                                    |
| Volume/ $\text{\AA}^3$                        | 1111.91(18)                                                   |
| Z                                             | 2                                                             |
| $\rho_{\text{calc}}/\text{cm}^3$              | 1.372                                                         |
| $\mu/\text{mm}^{-1}$                          | 0.103                                                         |
| F(000)                                        | 476.0                                                         |
| Crystal size/ $\text{mm}^3$                   | $0.45 \times 0.37 \times 0.1$                                 |
| Radiation                                     | MoK $\alpha$ ( $\lambda = 0.71073$ )                          |
| $2\theta$ range for data collection/ $^\circ$ | 4.858 to 55.012                                               |
| Index ranges                                  | $-12 \leq h \leq 12, -11 \leq k \leq 12, -15 \leq l \leq 15$  |
| Reflections collected                         | 18358                                                         |
| Independent reflections                       | 5062 [ $R_{\text{int}} = 0.0935, R_{\text{sigma}} = 0.0893$ ] |
| Data/restraints/parameters                    | 5062/0/308                                                    |

|                                                |                                  |
|------------------------------------------------|----------------------------------|
| Goodness-of-fit on $F^2$                       | 1.055                            |
| Final R indexes [ $I \geq 2\sigma(I)$ ]        | $R_1 = 0.0703$ , $wR_2 = 0.1888$ |
| Final R indexes [all data]                     | $R_1 = 0.1065$ , $wR_2 = 0.2161$ |
| Largest diff. peak/hole / $e \text{ \AA}^{-3}$ | 0.25/-0.28                       |

**Procedure for the recrystallization of 20:** To a 10 mL tube containing racemic **20** (37 mg) were added *n*-hexane (0.4 mL) and EtOAc (1.4 mL). The mixture was heated until a clear solution was formed, which was kept aside at room temperature to obtain crystals. The crystals were subjected for single crystal XRD to determine the relative configuration of **20**. The data were collected by an Bruker D8 Venture equipped with a Mo radiation source ( $K\alpha = 0.71073 \text{ \AA}$ ) at 150.0 K. CCDC 2381135 (**20**) contains the supplementary crystallographic data for this paper. These data can be obtained free of charge via [www.ccdc.cam.ac.uk/data\\_request/cif](http://www.ccdc.cam.ac.uk/data_request/cif).

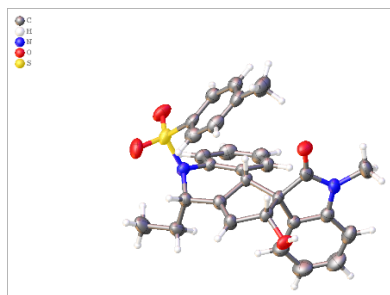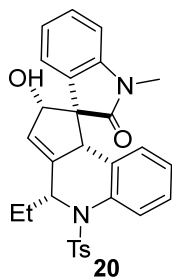

|                                  |                       |
|----------------------------------|-----------------------|
| Identification code              | <b>20</b>             |
| Empirical formula                | $C_{29}H_{28}N_2O_4S$ |
| Formula weight                   | 500.59                |
| Temperature/K                    | 150.0                 |
| Crystal system                   | triclinic             |
| Space group                      | P-1                   |
| $a/\text{\AA}$                   | 7.4687(15)            |
| $b/\text{\AA}$                   | 12.636(2)             |
| $c/\text{\AA}$                   | 14.057(3)             |
| $\alpha/^\circ$                  | 86.841(7)             |
| $\beta/^\circ$                   | 76.742(7)             |
| $\gamma/^\circ$                  | 75.308(7)             |
| Volume/ $\text{\AA}^3$           | 1249.1(4)             |
| Z                                | 2                     |
| $\rho_{\text{calc}}/\text{cm}^3$ | 1.331                 |
| $\mu/\text{mm}^{-1}$             | 0.168                 |
| $F(000)$                         | 528.0                 |



|                                                  |                                                                      |
|--------------------------------------------------|----------------------------------------------------------------------|
| Crystal size/mm <sup>3</sup>                     | 0.24 × 0.15 × 0.1                                                    |
| Radiation                                        | MoK $\alpha$ ( $\lambda = 0.71073$ )                                 |
| 2 $\Theta$ range for data collection/ $^{\circ}$ | 4.462 to 49.992                                                      |
| Index ranges                                     | -8 $\leq$ h $\leq$ 8, -15 $\leq$ k $\leq$ 15, -16 $\leq$ l $\leq$ 16 |
| Reflections collected                            | 17419                                                                |
| Independent reflections                          | 4281 [R <sub>int</sub> = 0.0923, R <sub>sigma</sub> = 0.0765]        |
| Data/restraints/parameters                       | 4281/0/330                                                           |
| Goodness-of-fit on F <sup>2</sup>                | 1.113                                                                |
| Final R indexes [I $\geq$ 2 $\sigma$ (I)]        | R <sub>1</sub> = 0.0965, wR <sub>2</sub> = 0.2626                    |
| Final R indexes [all data]                       | R <sub>1</sub> = 0.1265, wR <sub>2</sub> = 0.2881                    |
| Largest diff. peak/hole / e $\text{\AA}^{-3}$    | 0.90/-0.44                                                           |

# 11. NMR, HRMS spectra and HPLC chromatograms

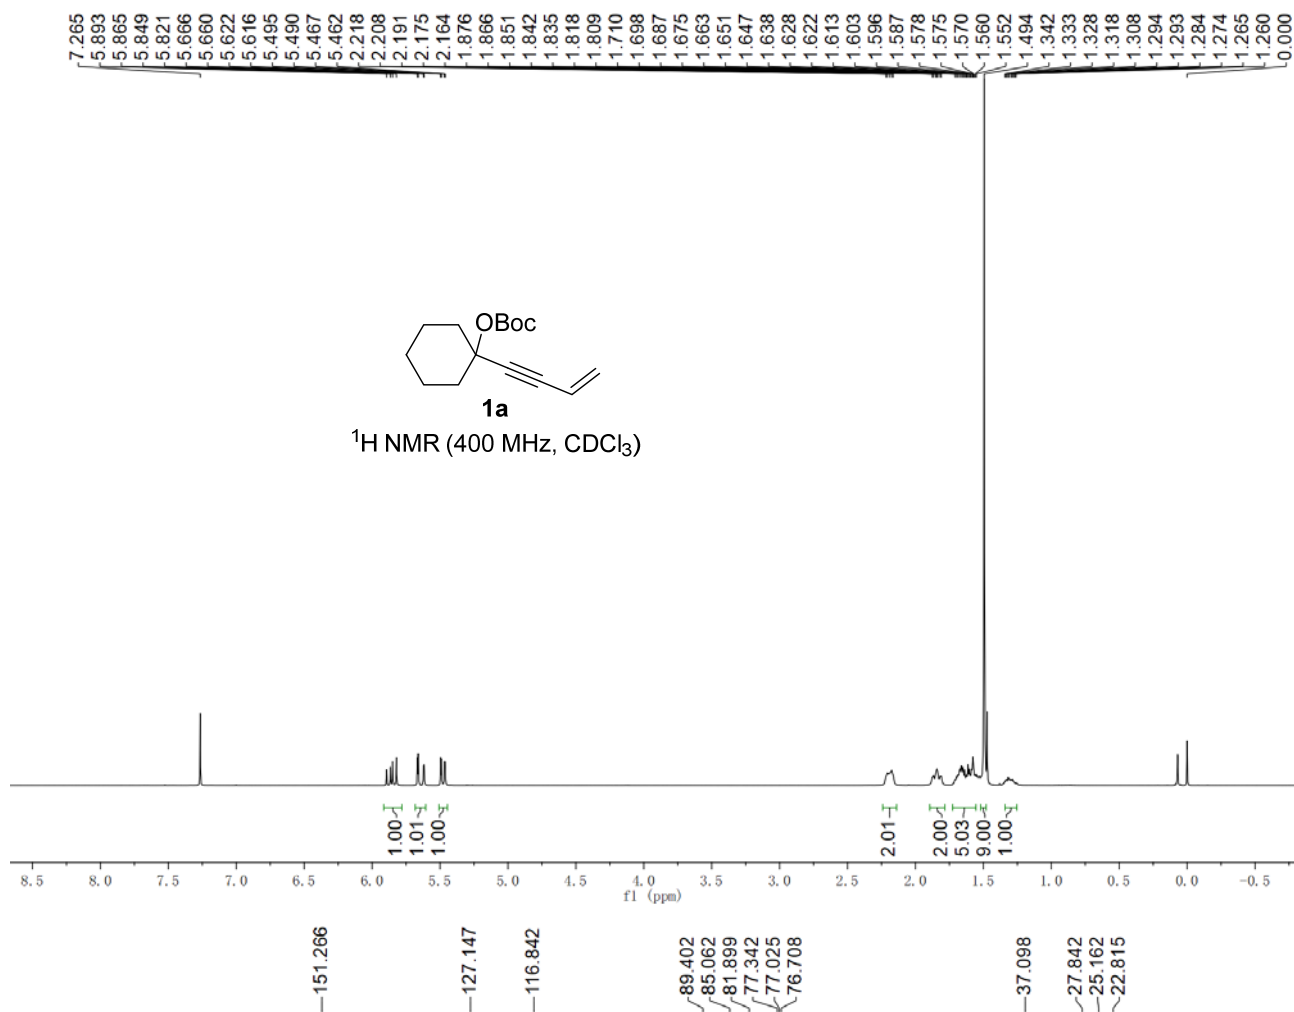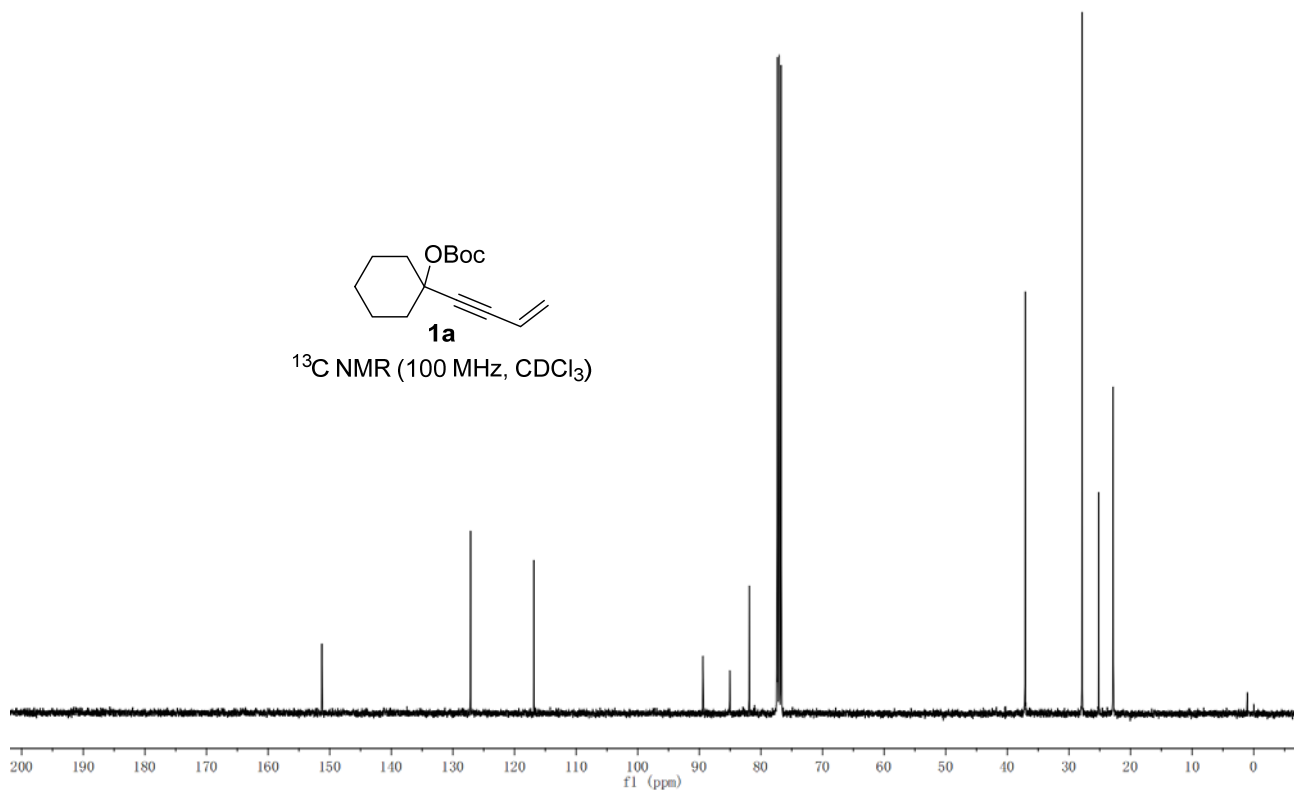

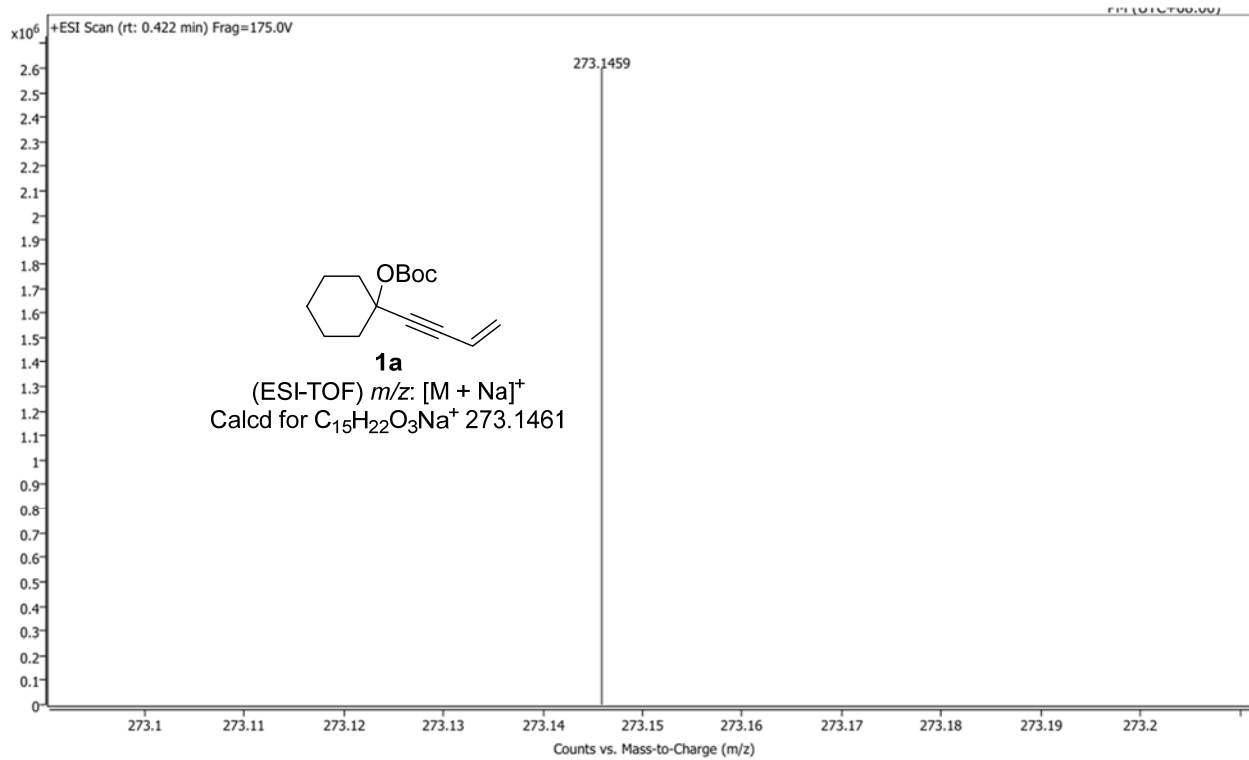

7.271  
5.867  
5.865  
5.840  
5.838  
5.824  
5.821  
5.796  
5.794  
5.639  
5.634  
5.595  
5.590  
5.477  
5.471  
5.449  
5.445  
2.315  
2.311  
2.309  
2.301  
2.297  
2.295  
2.292  
2.281  
2.278  
2.275  
2.266  
2.262  
2.259  
2.175  
2.171  
2.165  
2.158  
2.155  
2.152  
2.149  
2.144  
2.137  
2.134  
2.128  
2.122  
2.120  
2.117  
2.114  
1.791  
1.782  
1.773  
1.770  
1.768  
1.762  
1.758  
1.755  
1.748  
1.744  
1.736  
1.732  
1.496  
0.000

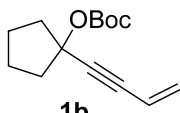

**1b**

<sup>1</sup>H NMR (400 MHz, CDCl<sub>3</sub>)

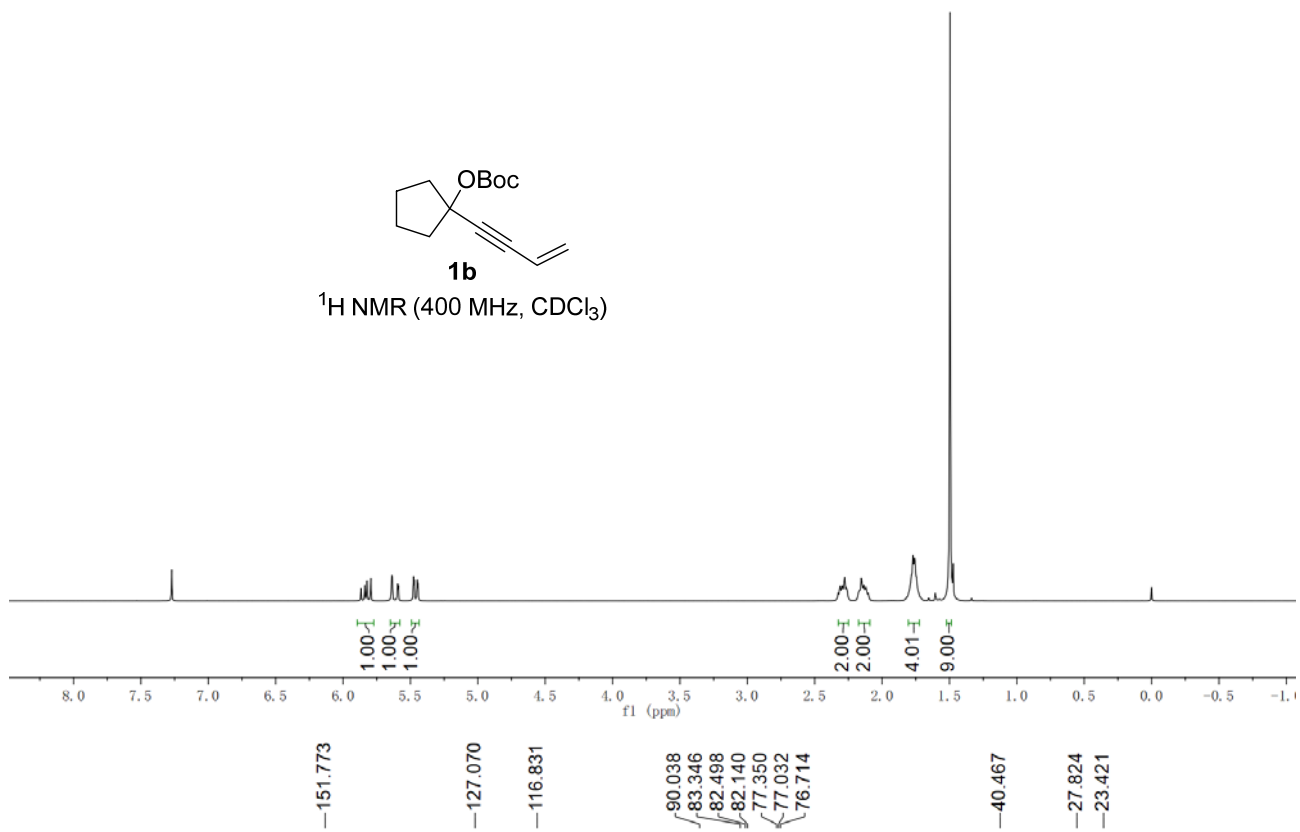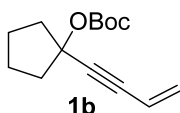

**1b**

<sup>13</sup>C NMR (100 MHz, CDCl<sub>3</sub>)

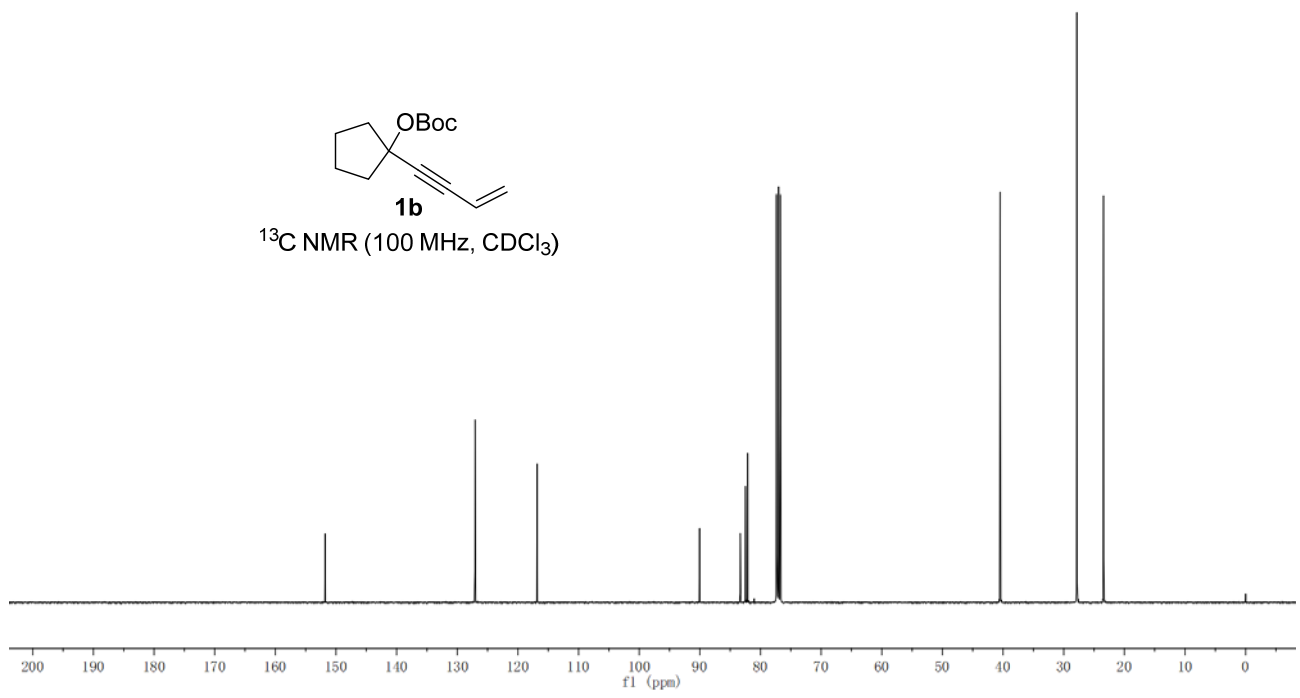

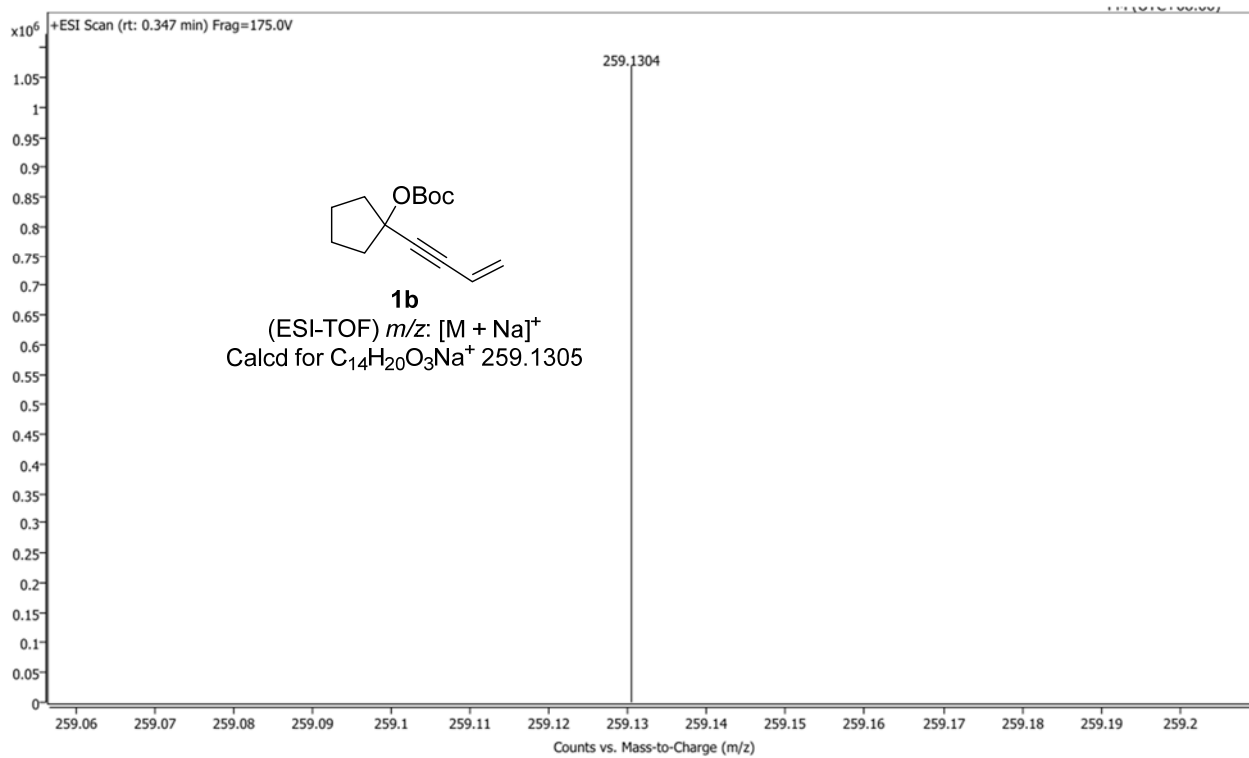

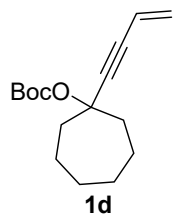

<sup>1</sup>H NMR (400 MHz, CDCl<sub>3</sub>)

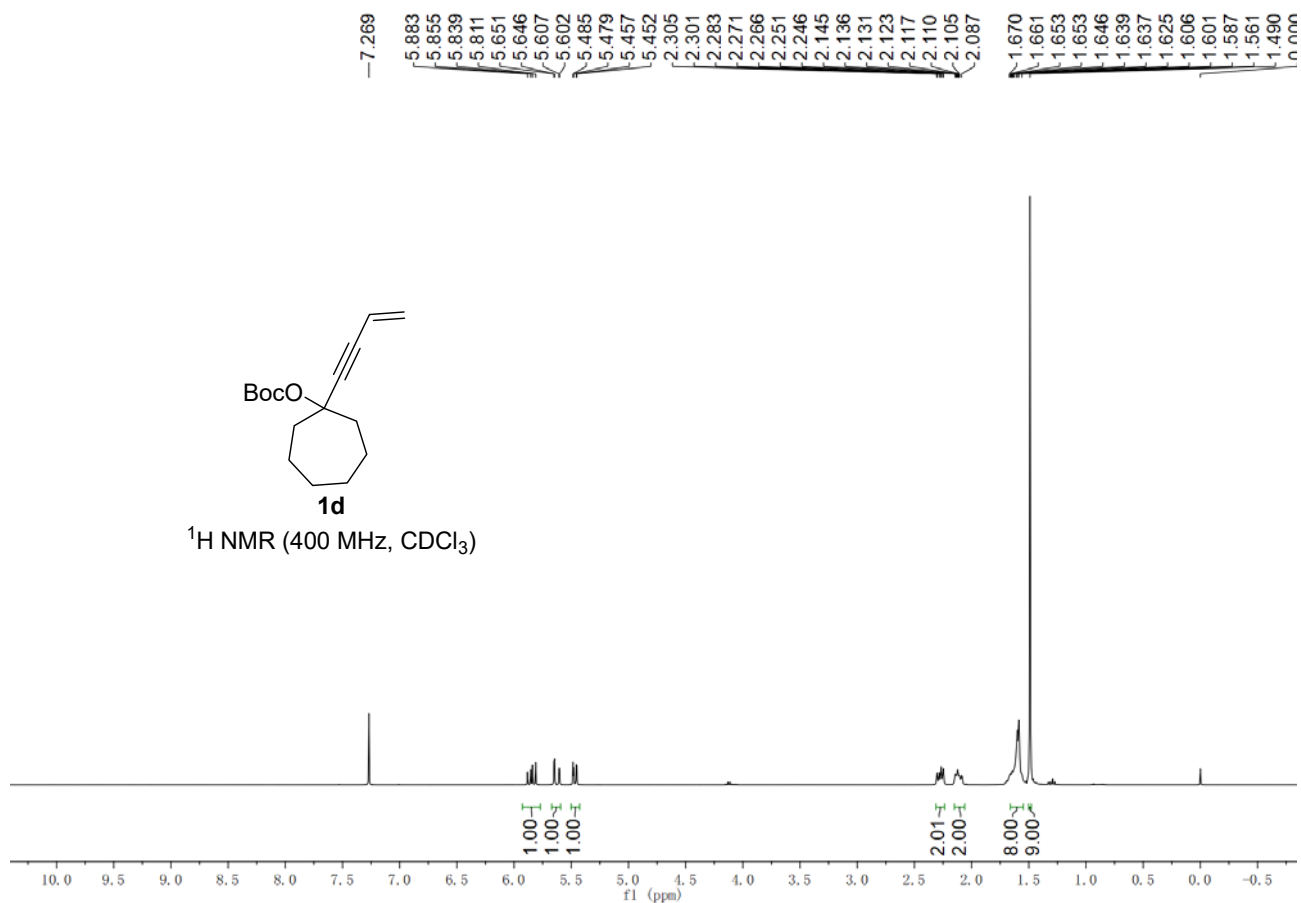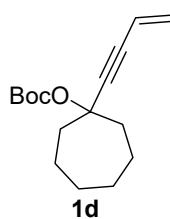

<sup>13</sup>C NMR (100 MHz, CDCl<sub>3</sub>)

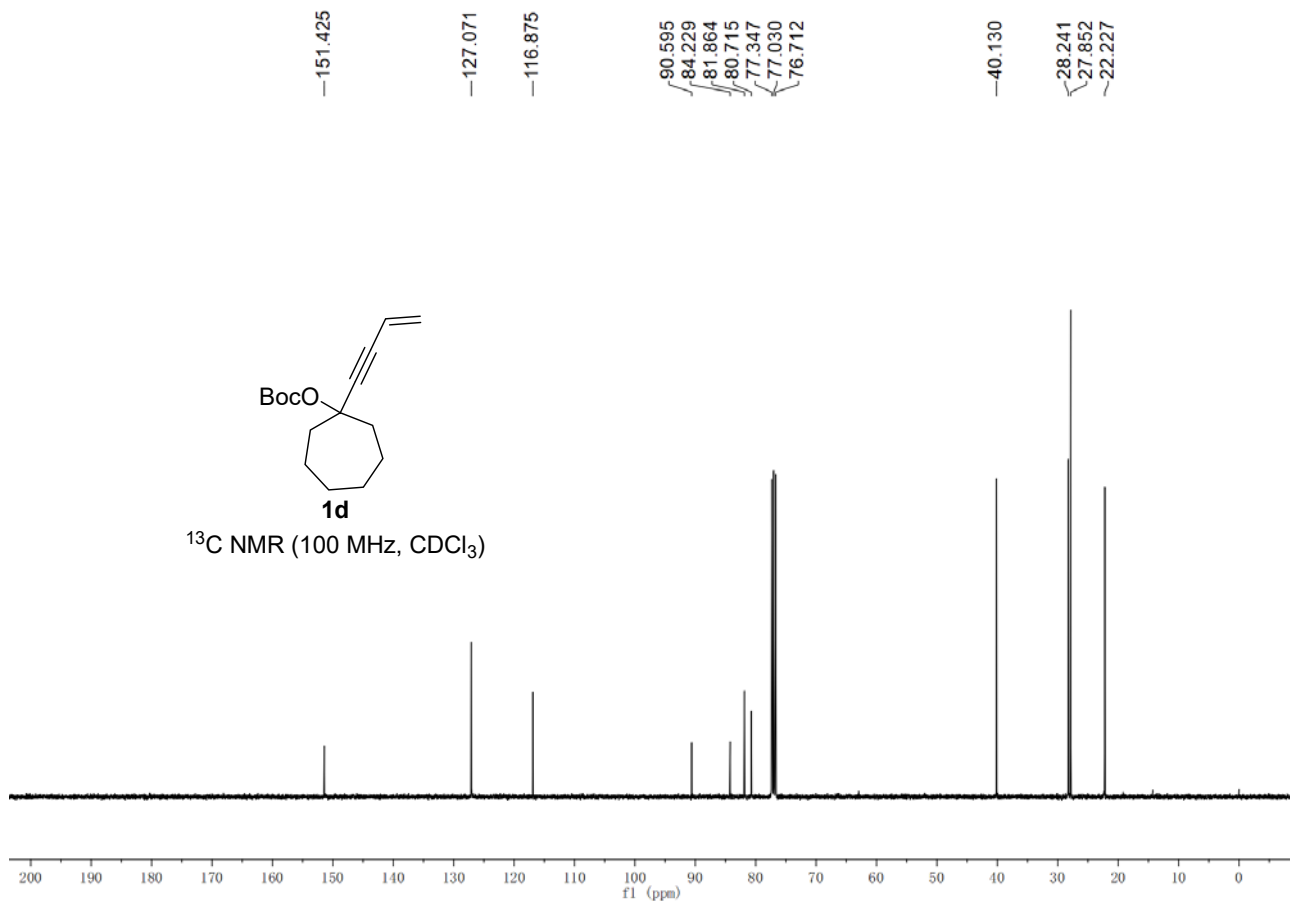

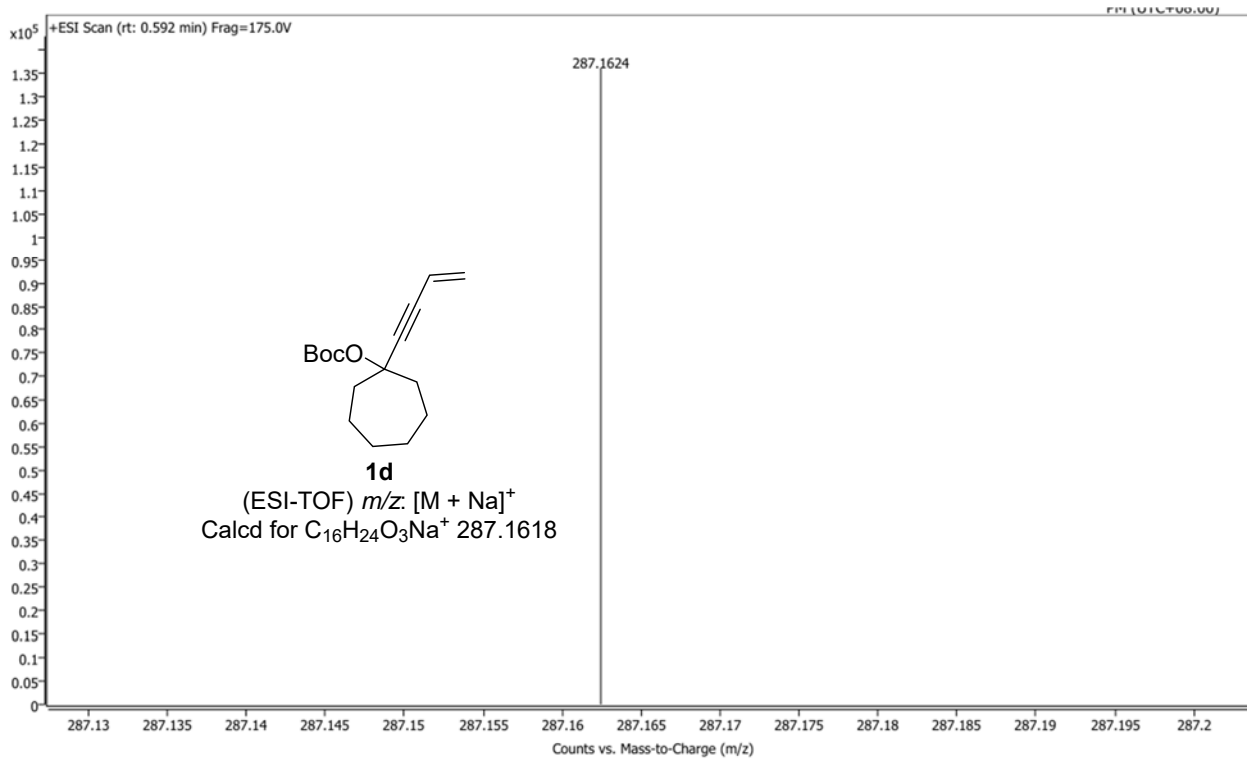

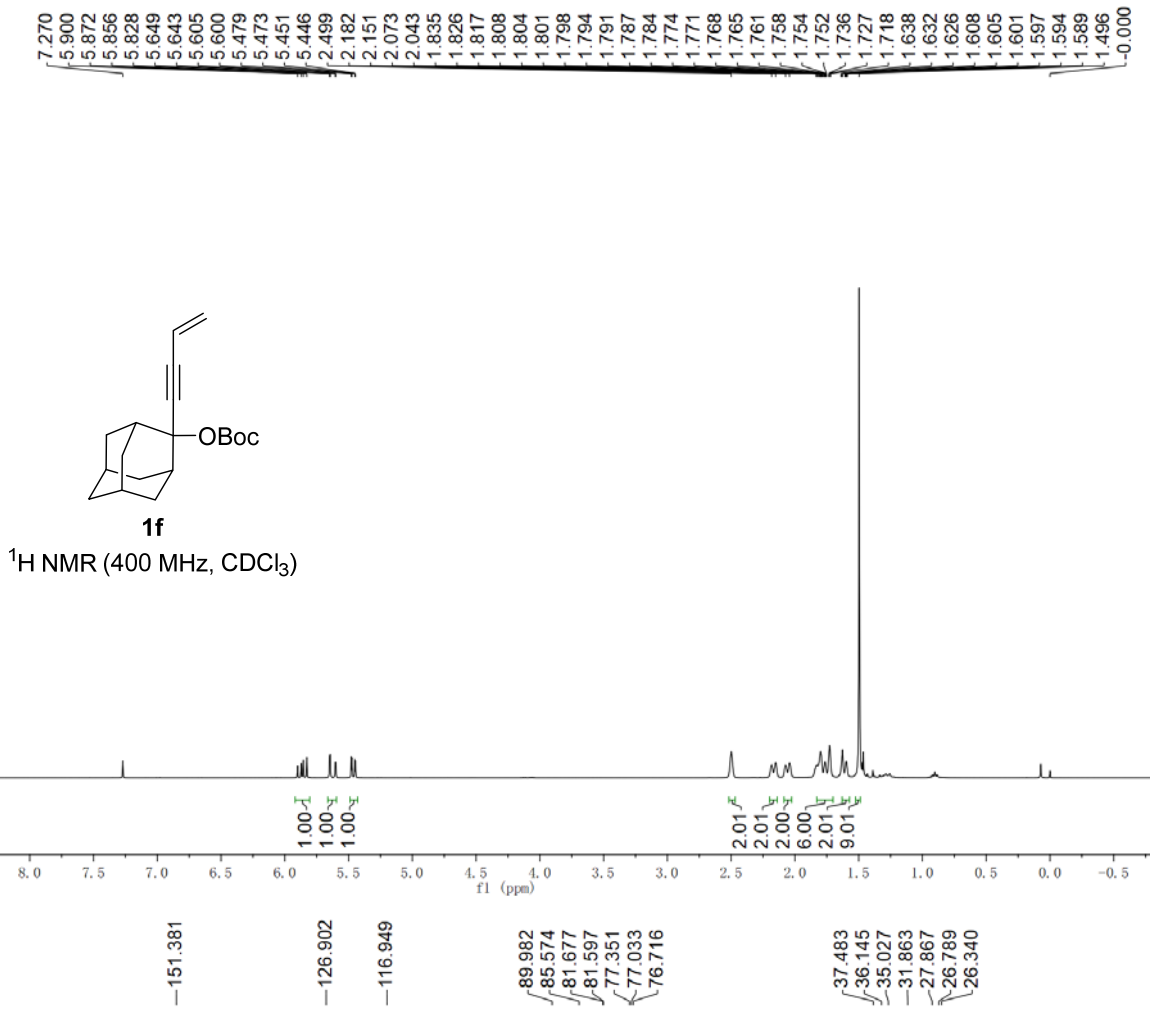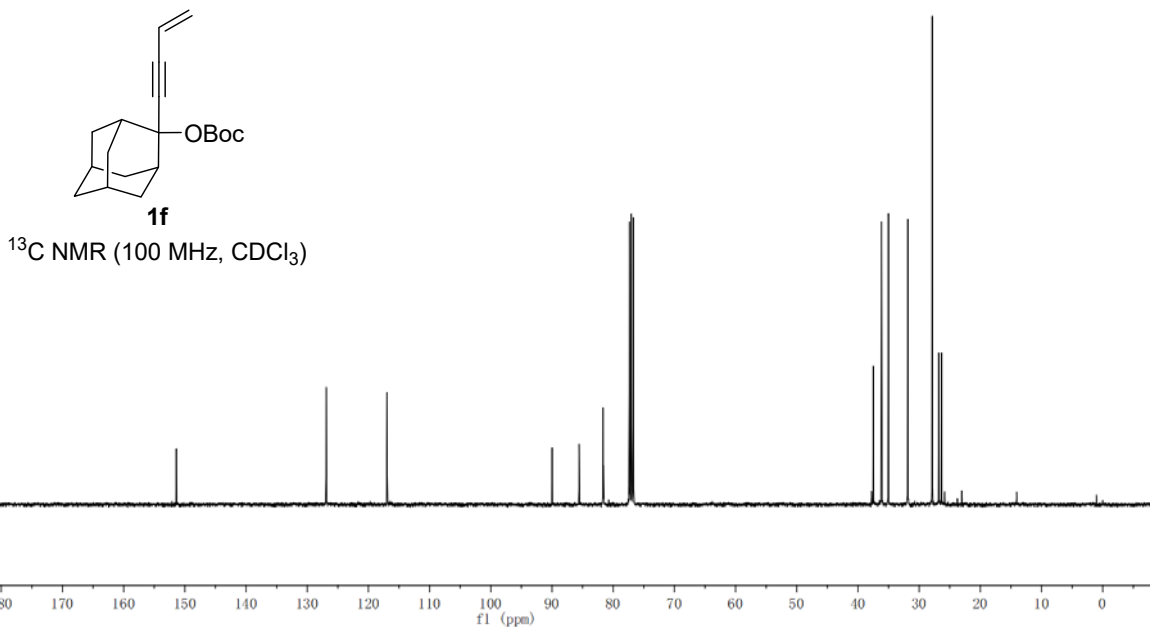



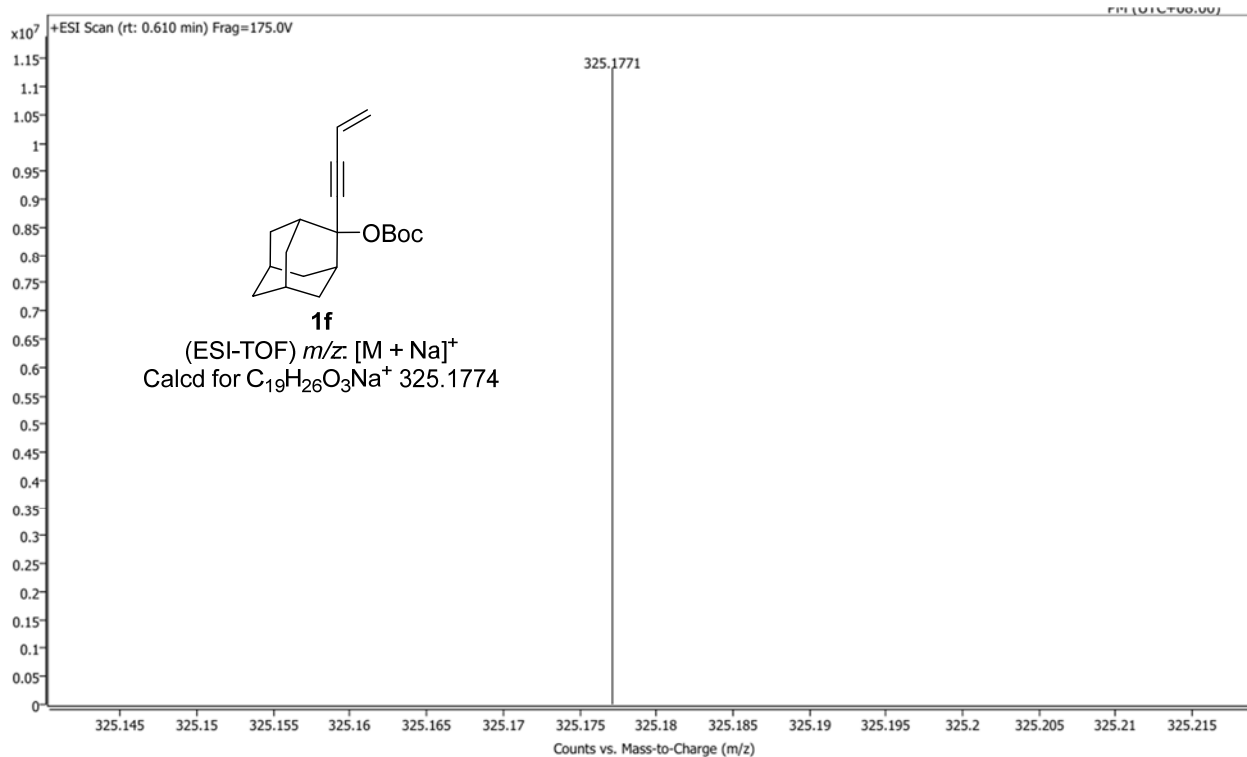

-7.268  
 5.872  
 5.844  
 5.828  
 5.800  
 5.645  
 5.640  
 5.601  
 5.596  
 5.479  
 5.473  
 5.451  
 5.445  
 2.110  
 2.099  
 2.083  
 2.076  
 2.071  
 2.065  
 2.048  
 2.042  
 2.037  
 1.934  
 1.923  
 1.906  
 1.900  
 1.895  
 1.888  
 1.872  
 1.861  
 1.486  
 1.384  
 1.374  
 1.340  
 1.316  
 1.310  
 1.302  
 -0.000

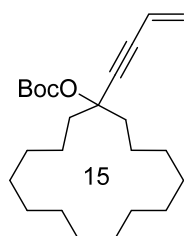

**1g**  
<sup>1</sup>H NMR (400 MHz, CDCl<sub>3</sub>)

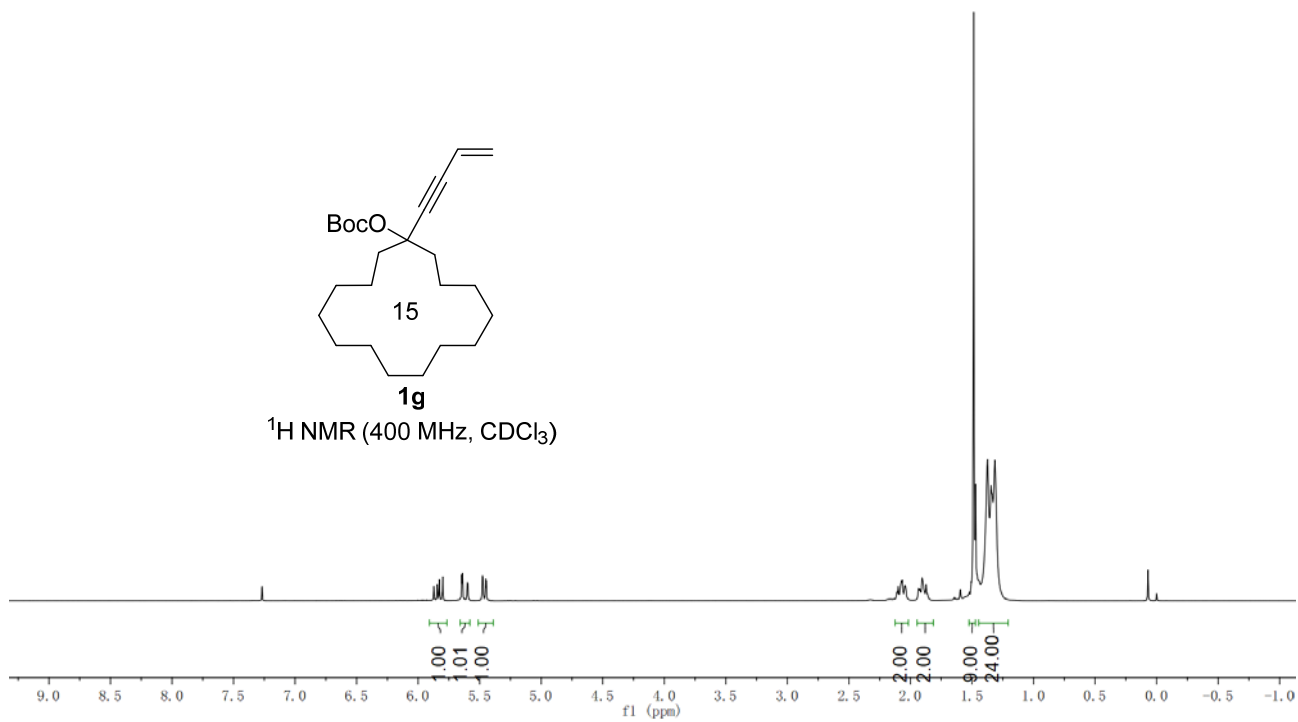

-150.293  
 -126.081  
 -115.810  
 89.027  
 83.284  
 80.767  
 78.764  
 76.326  
 76.009  
 75.691  
 35.540  
 26.817  
 26.234  
 25.902  
 25.627  
 25.392  
 20.699

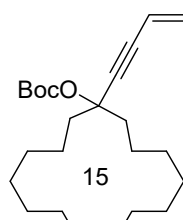

**1g**  
<sup>13</sup>C NMR (100 MHz, CDCl<sub>3</sub>)

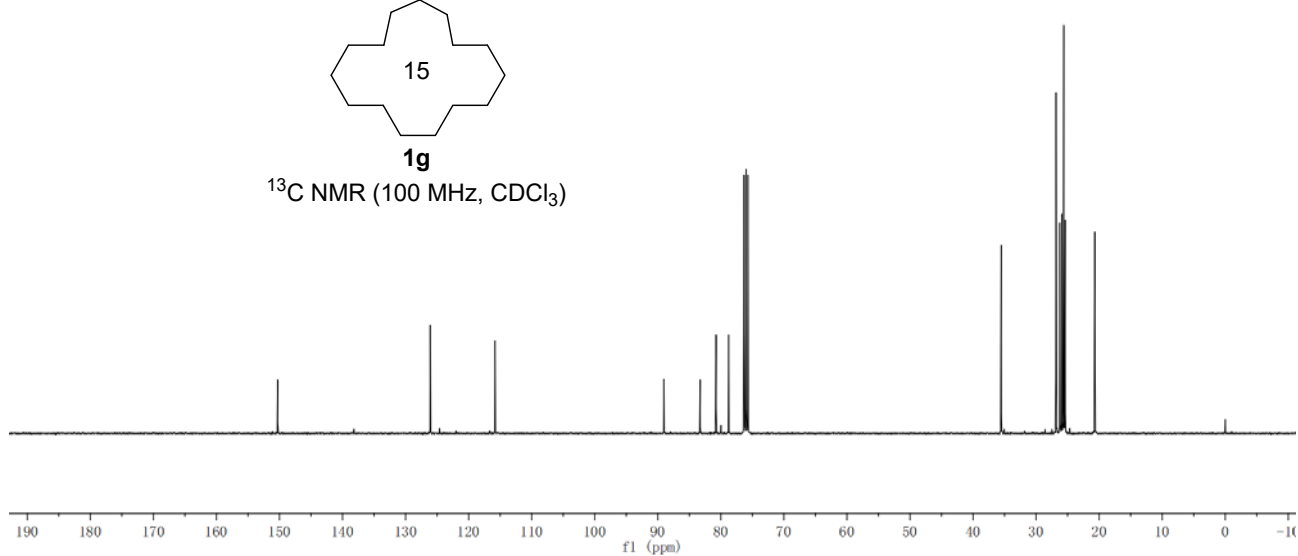

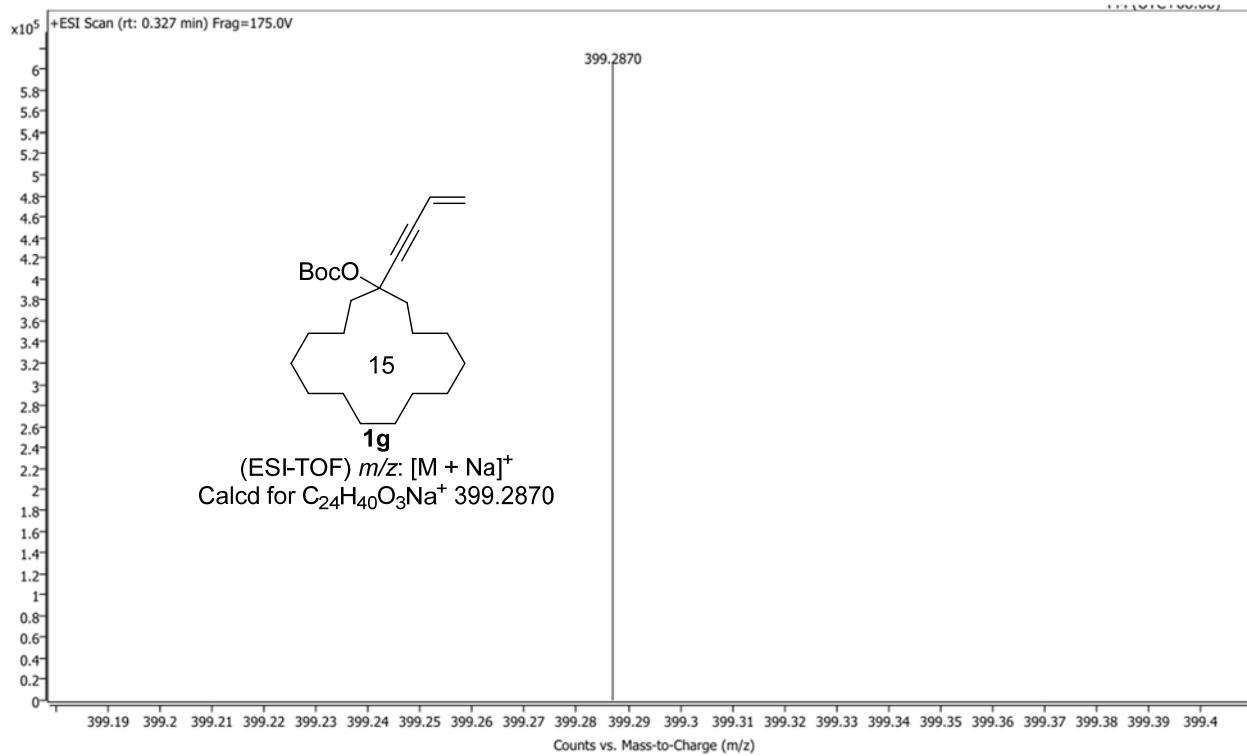

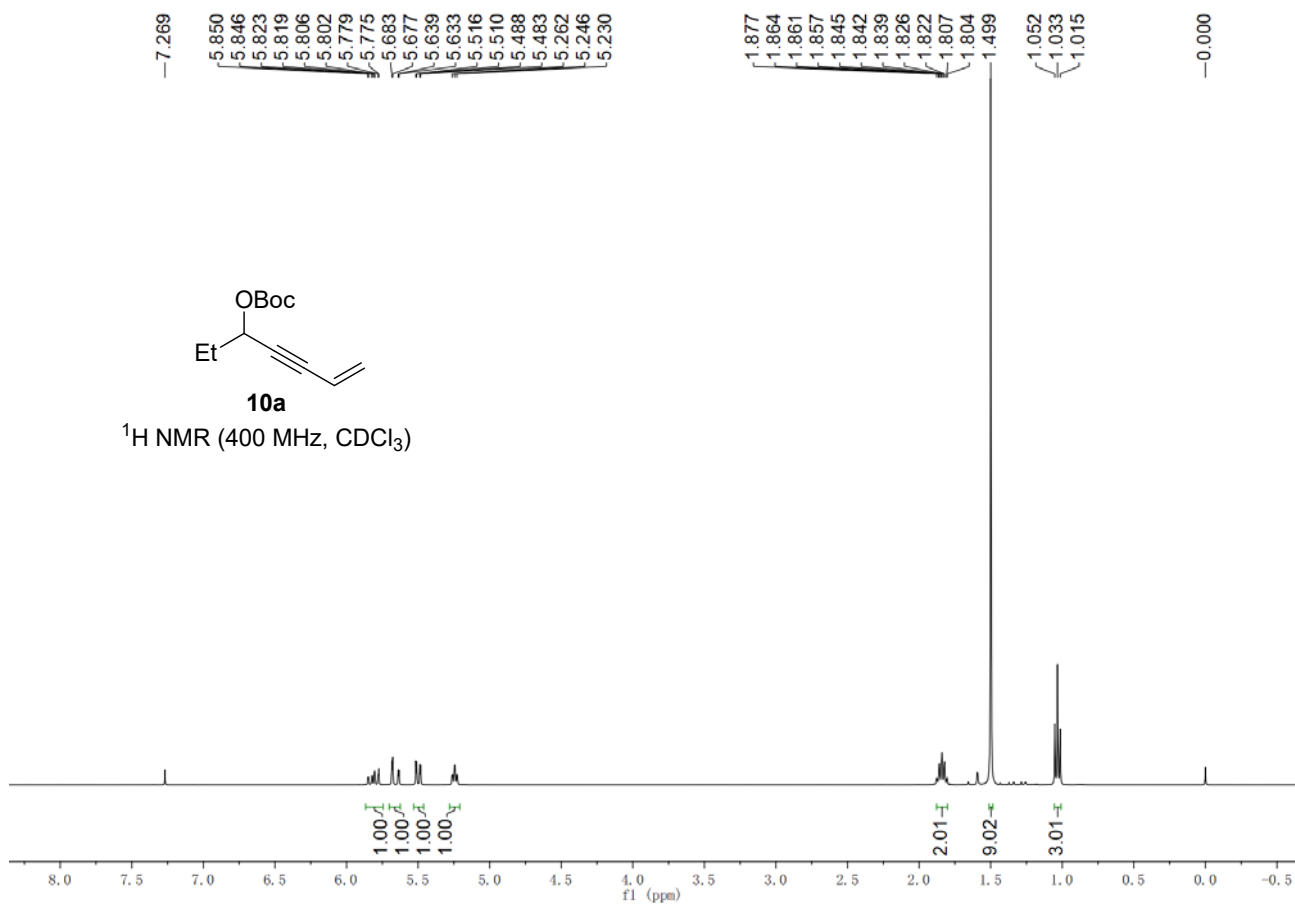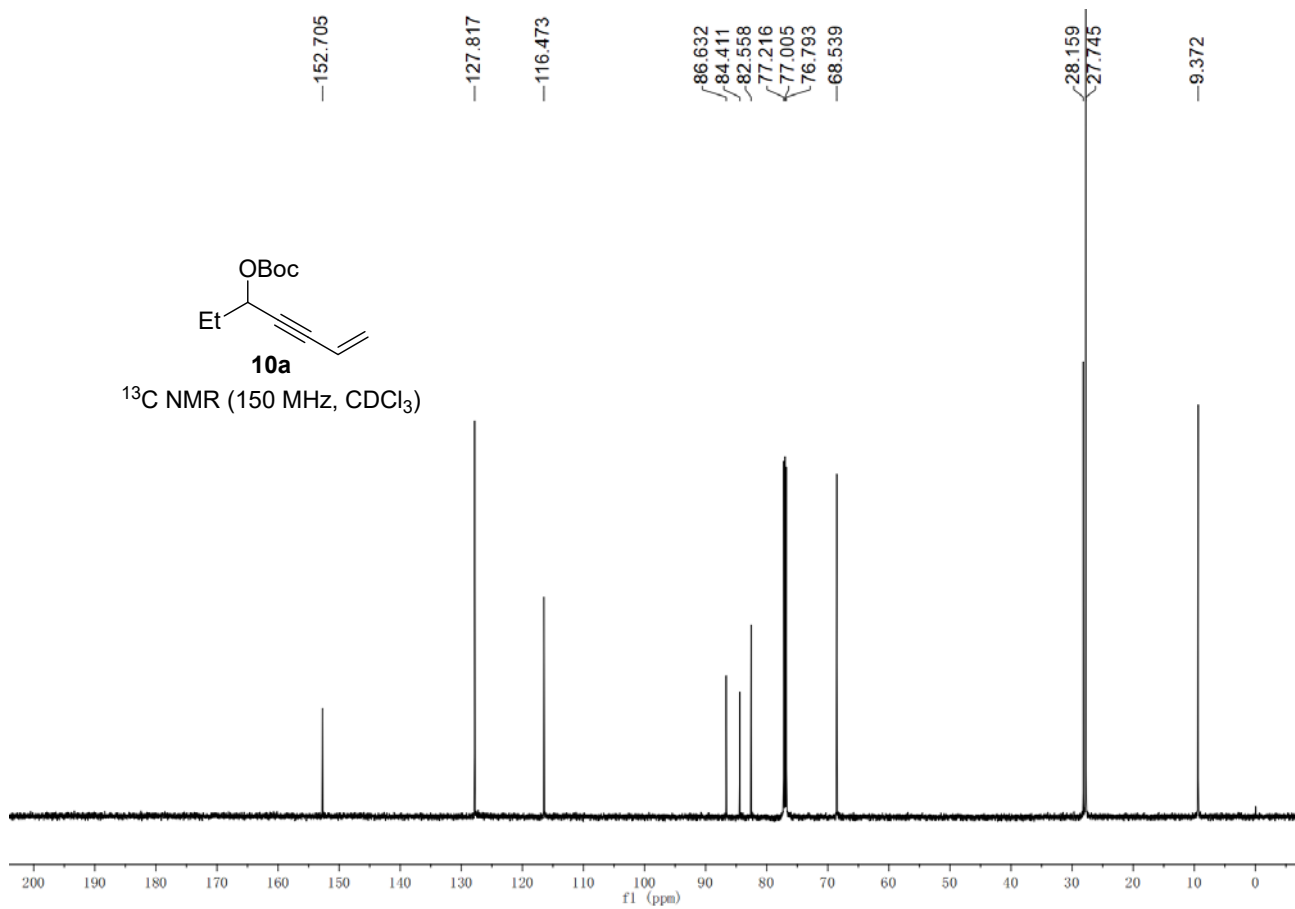

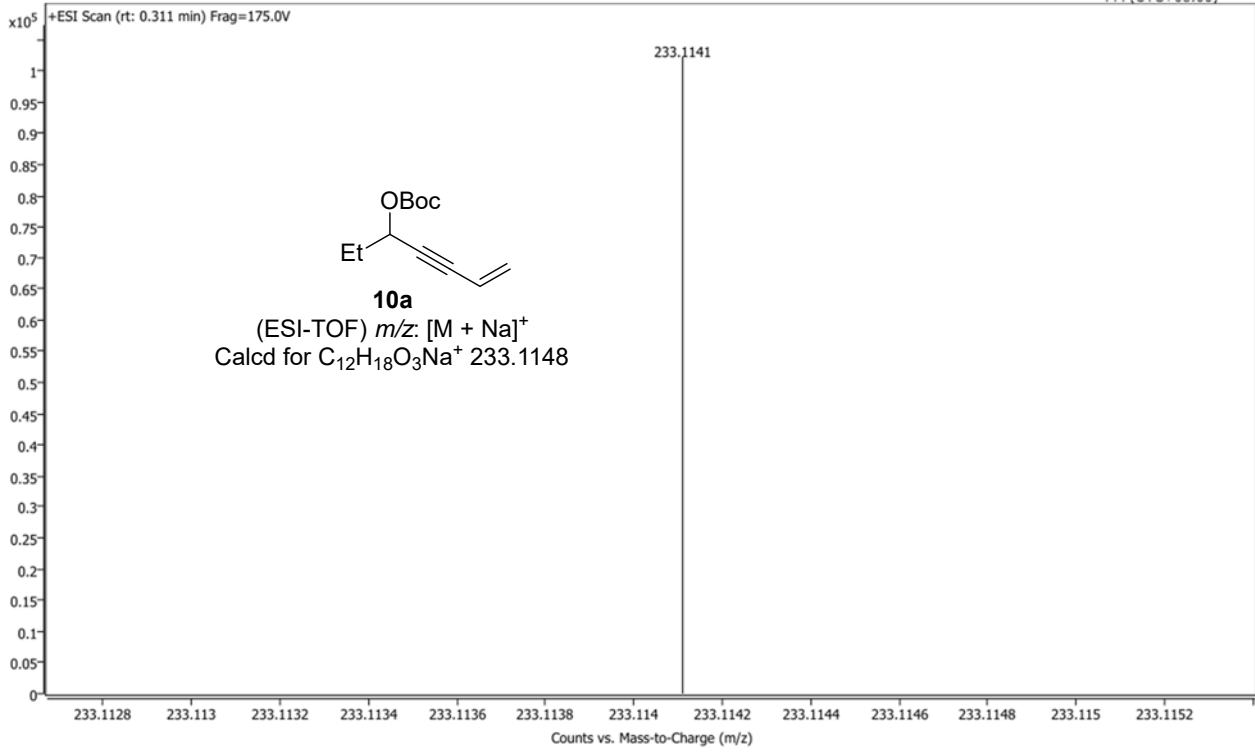

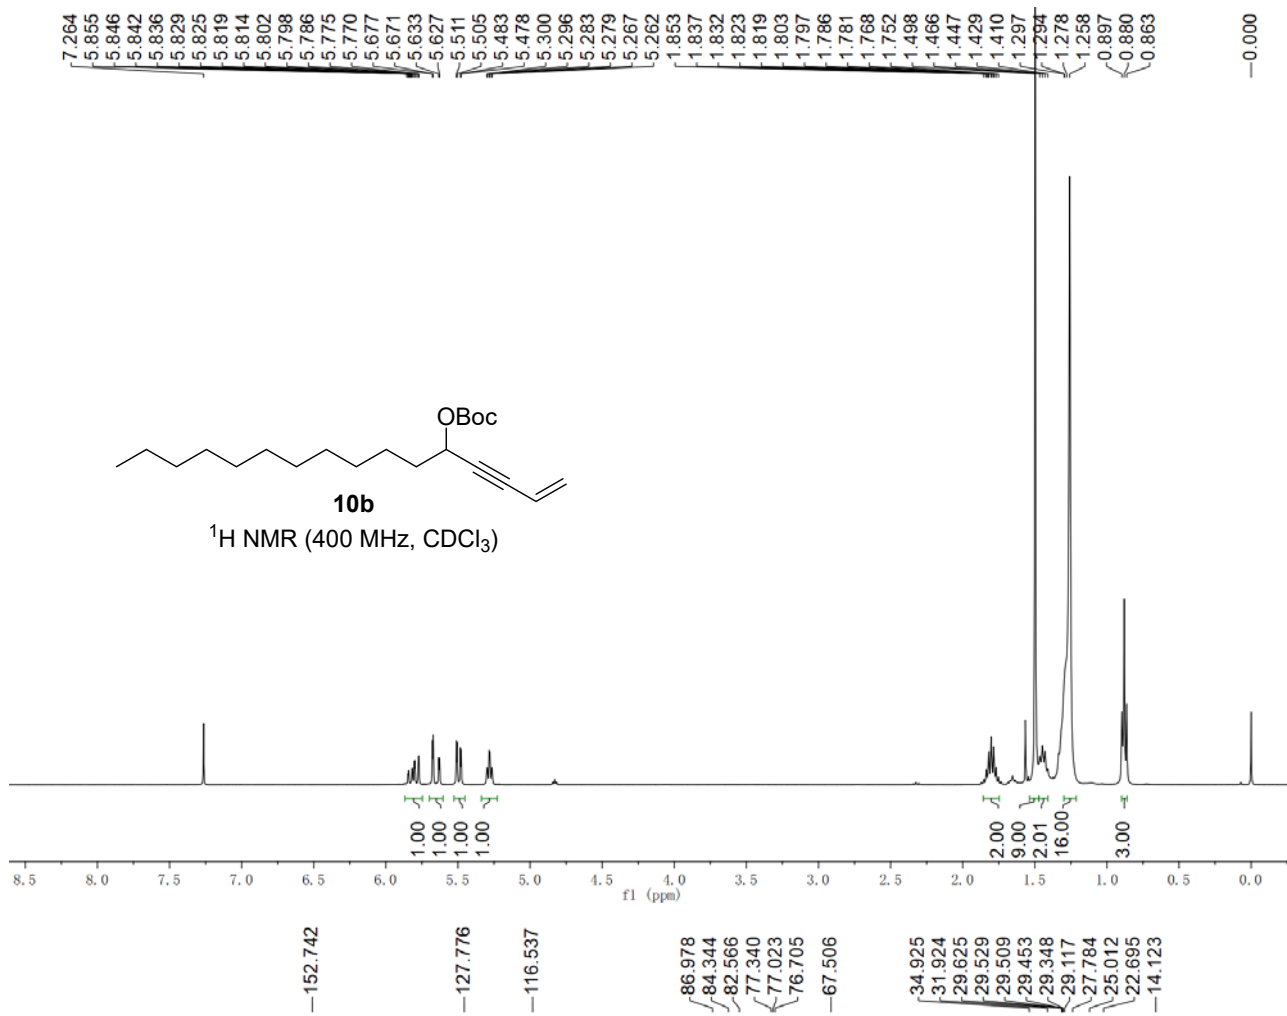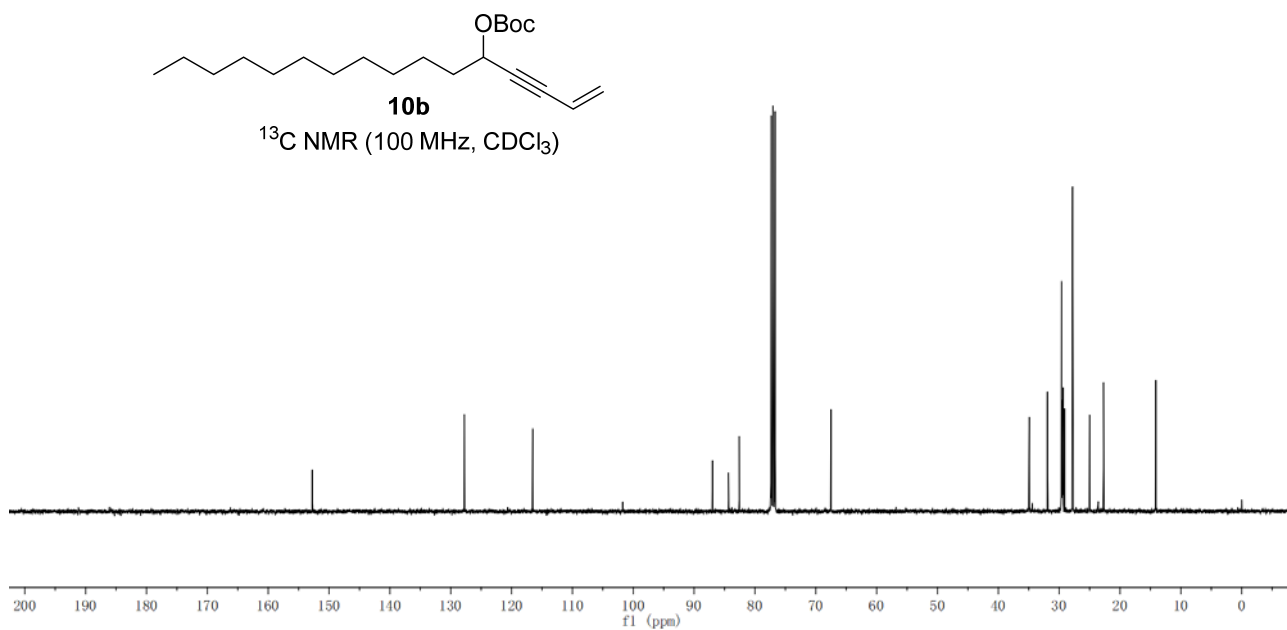

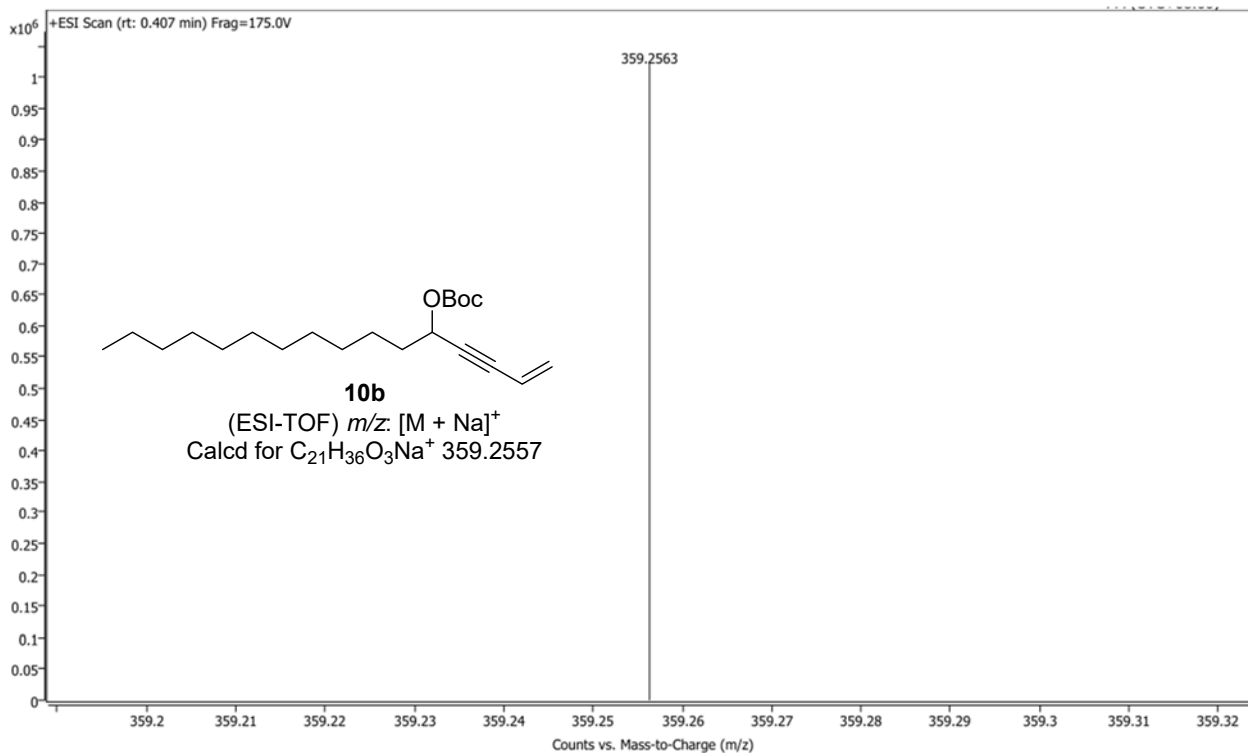

7.265  
5.802  
5.798  
5.775  
5.770  
5.677  
5.671  
5.633  
5.627  
5.512  
5.506  
5.484  
5.479  
5.258  
5.242  
1.852  
1.838  
1.834  
1.818  
1.812  
1.800  
1.796  
1.782  
1.724  
1.714  
1.706  
1.699  
1.690  
1.682  
1.673  
1.665  
1.657  
1.654  
1.634  
1.627  
1.623  
1.498  
1.366  
1.348  
1.337  
1.329  
1.309  
1.259  
1.249  
1.242  
1.239  
1.231  
1.223  
1.209  
1.201  
1.194  
1.177  
1.171  
1.148  
0.912  
0.904  
0.882  
0.876  
0.000

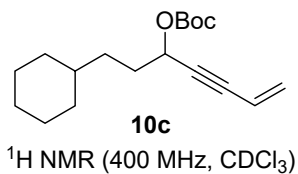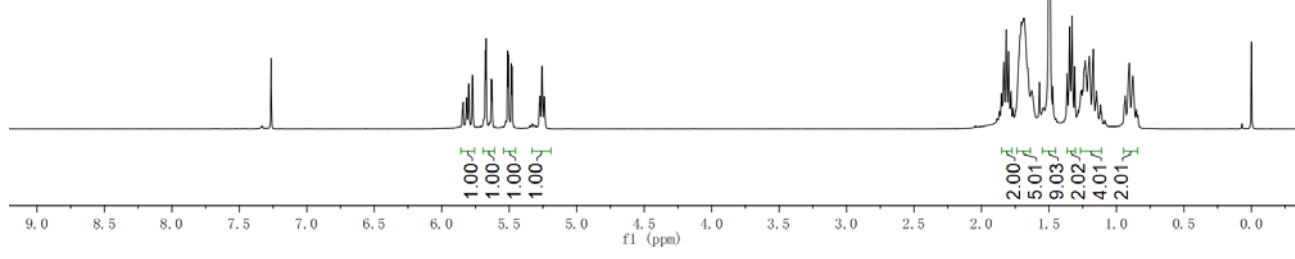

-152.734  
 -127.778  
 -116.539  
 -87.004  
 -84.350  
 -82.556  
 -77.346  
 -77.028  
 -76.711  
 -67.794  
 -37.288  
 -33.270  
 -33.179  
 -32.508  
 -32.407  
 -27.784  
 -26.608  
 -26.309

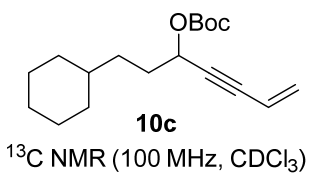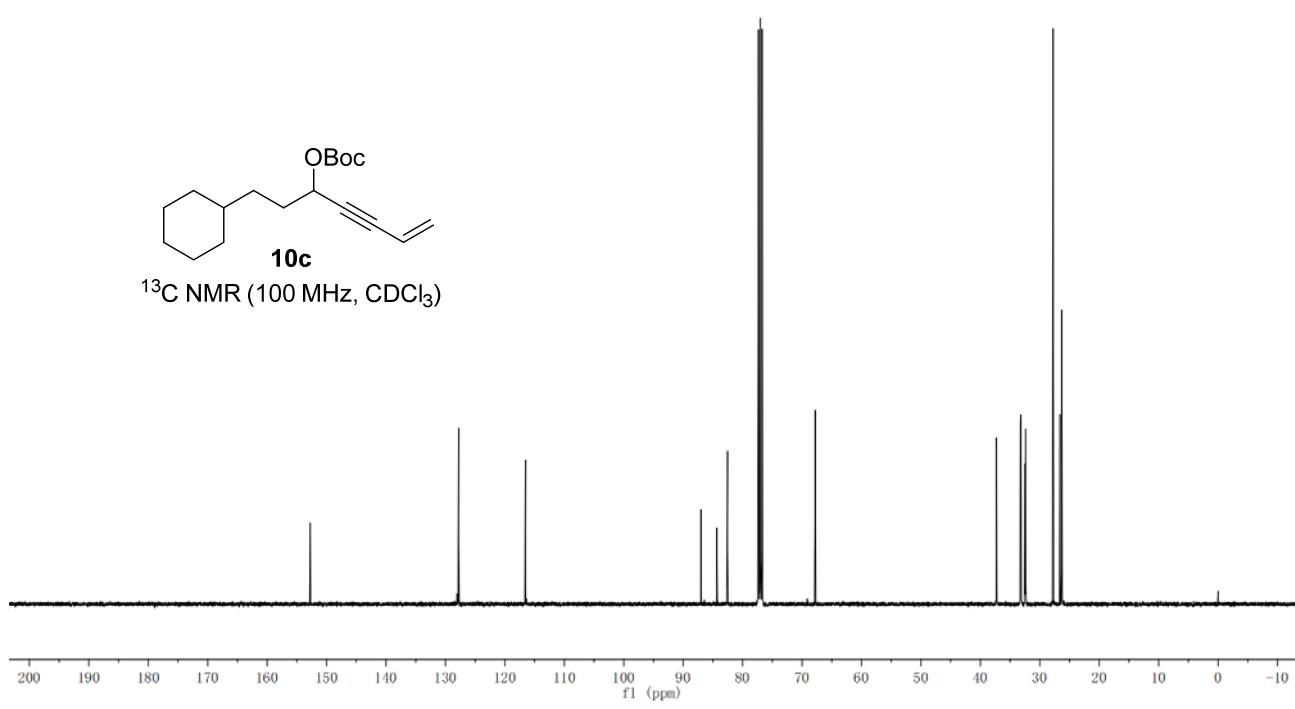



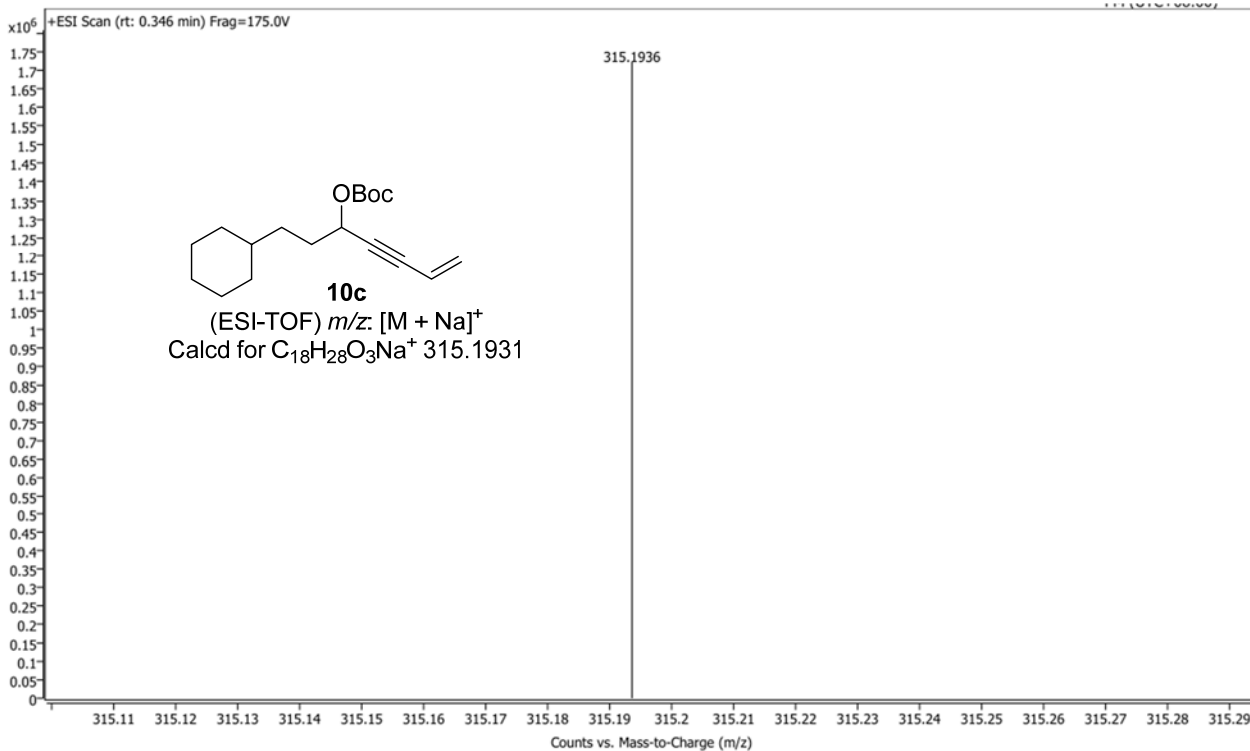

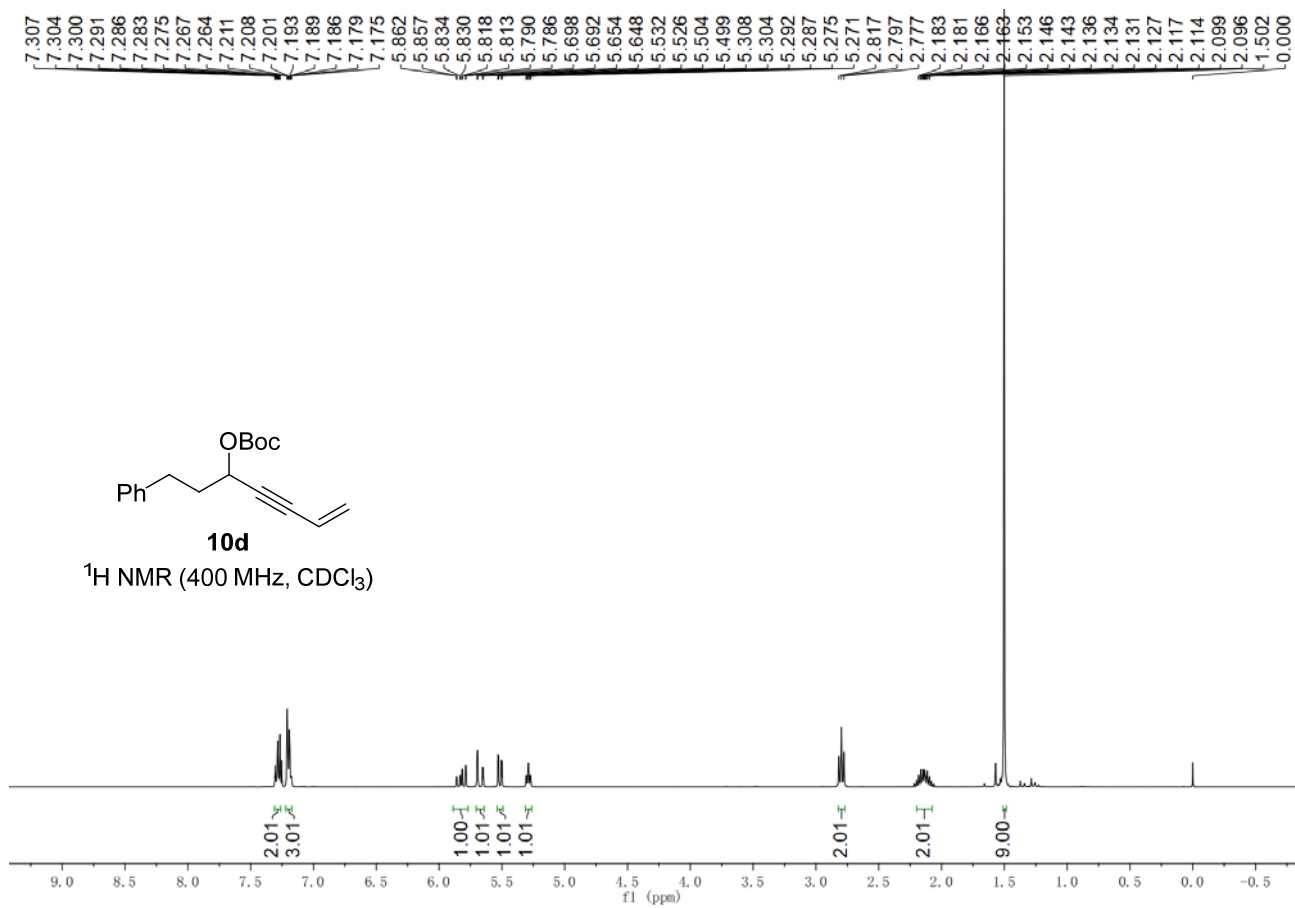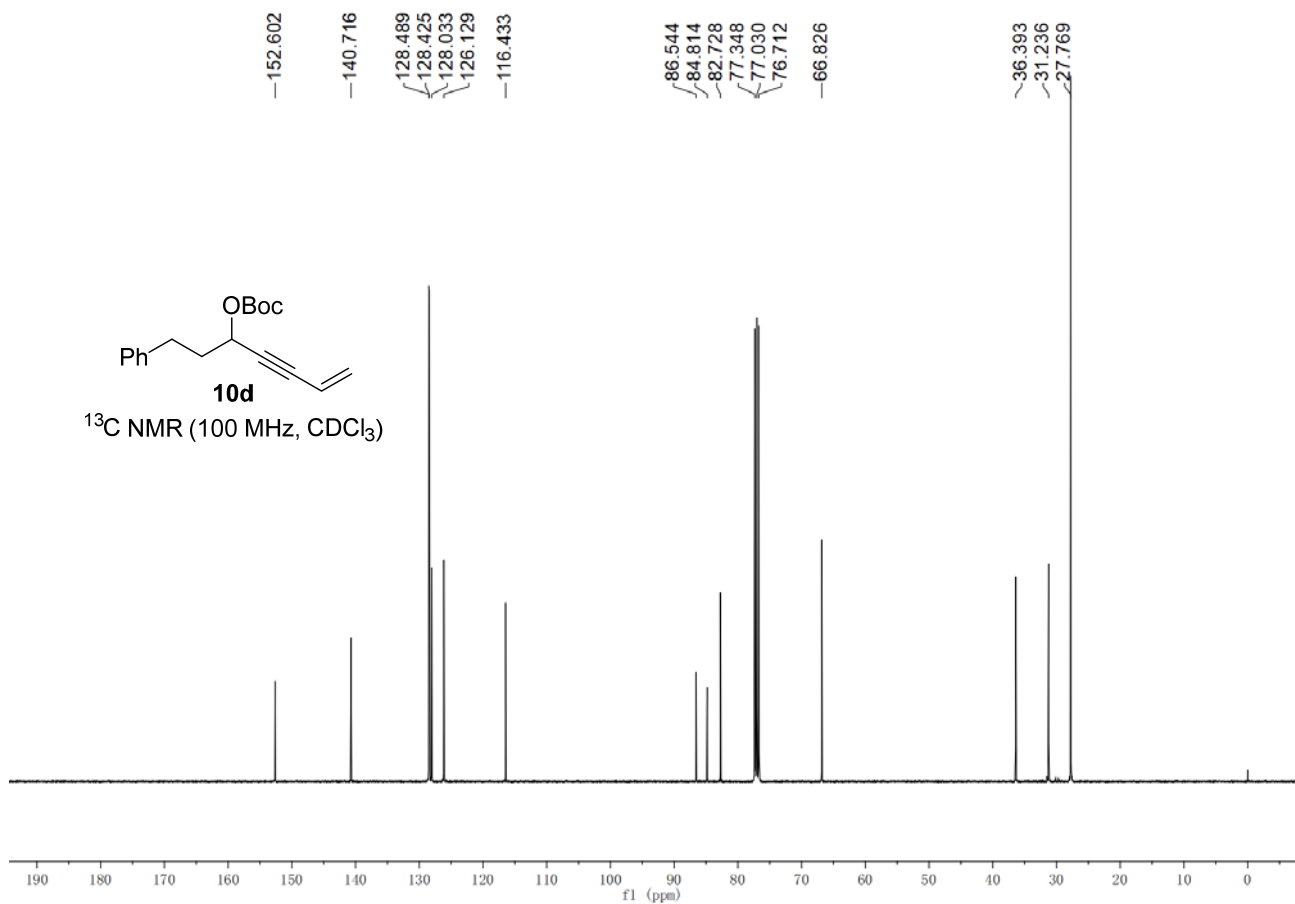

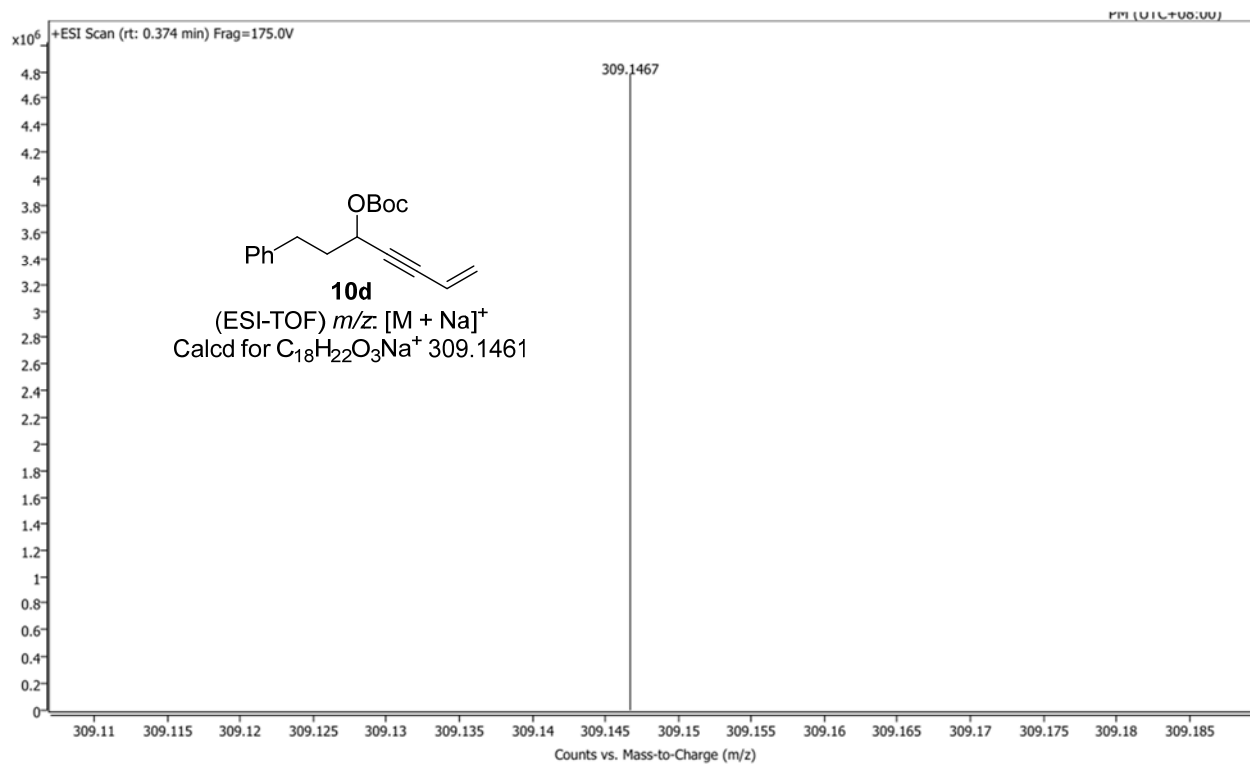

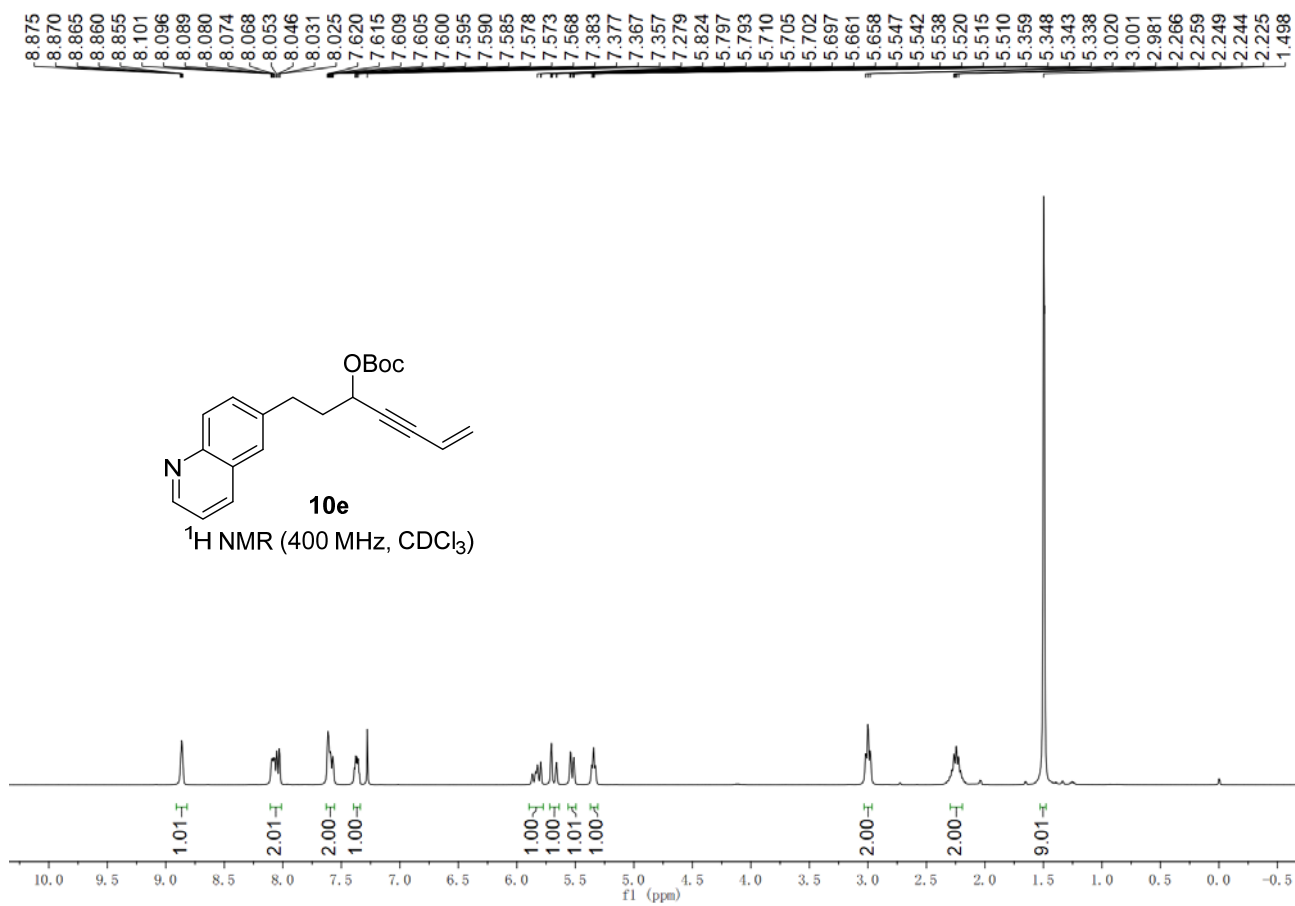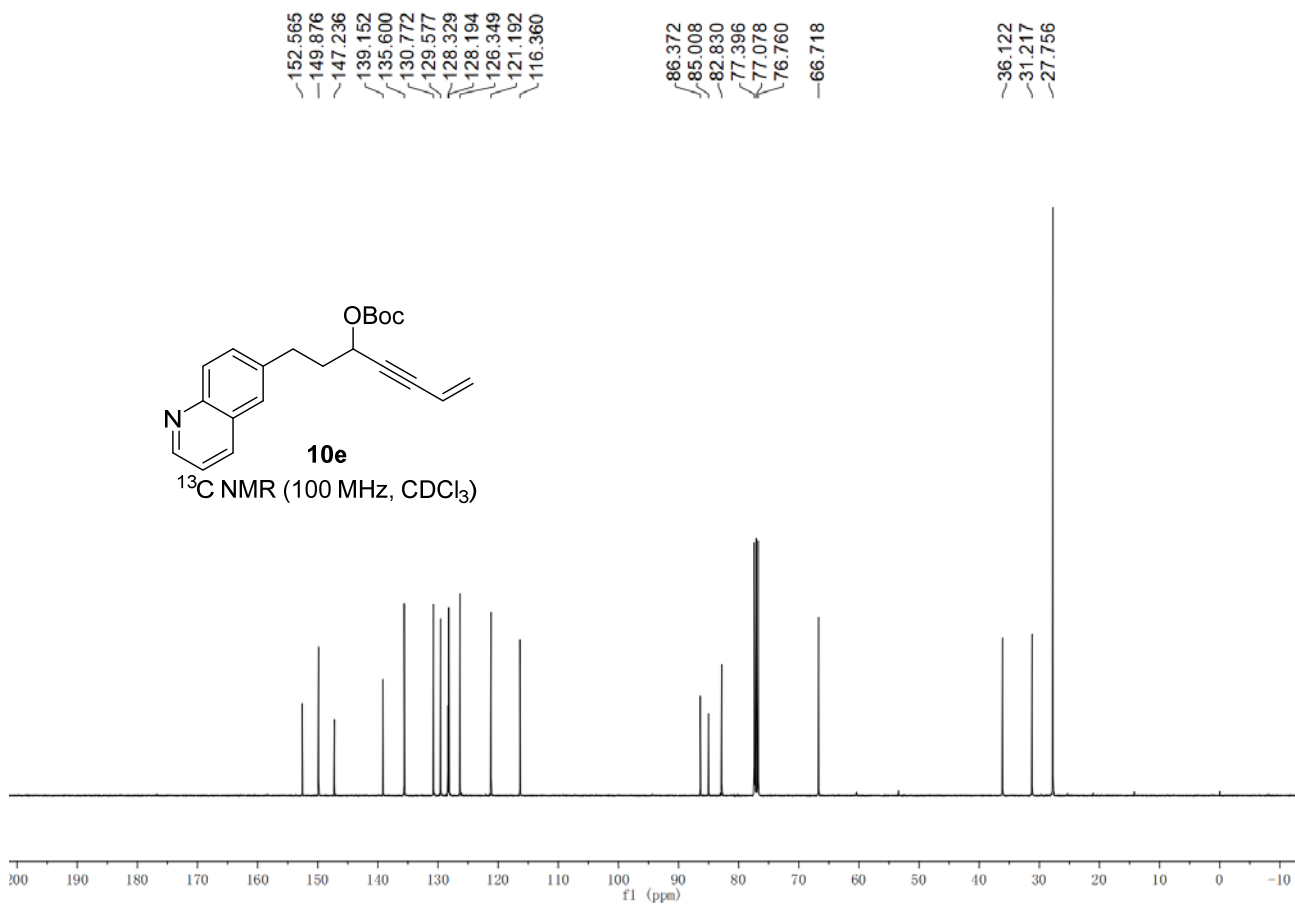

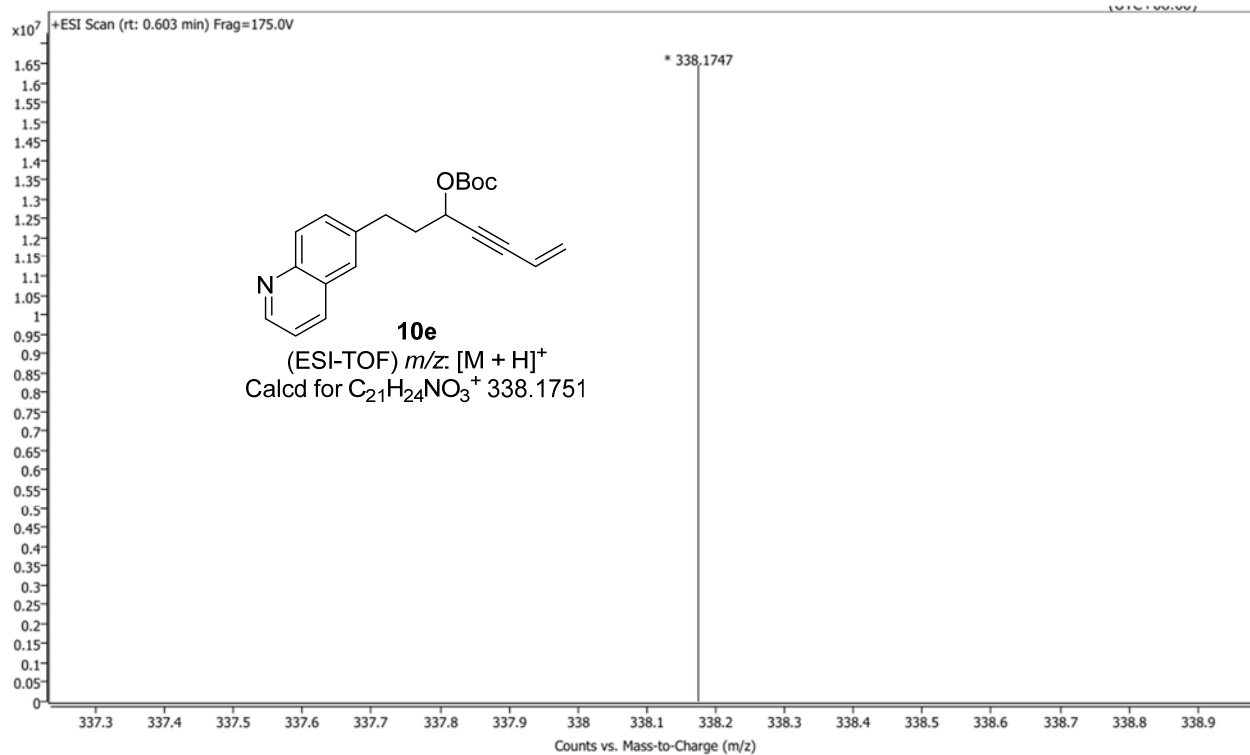

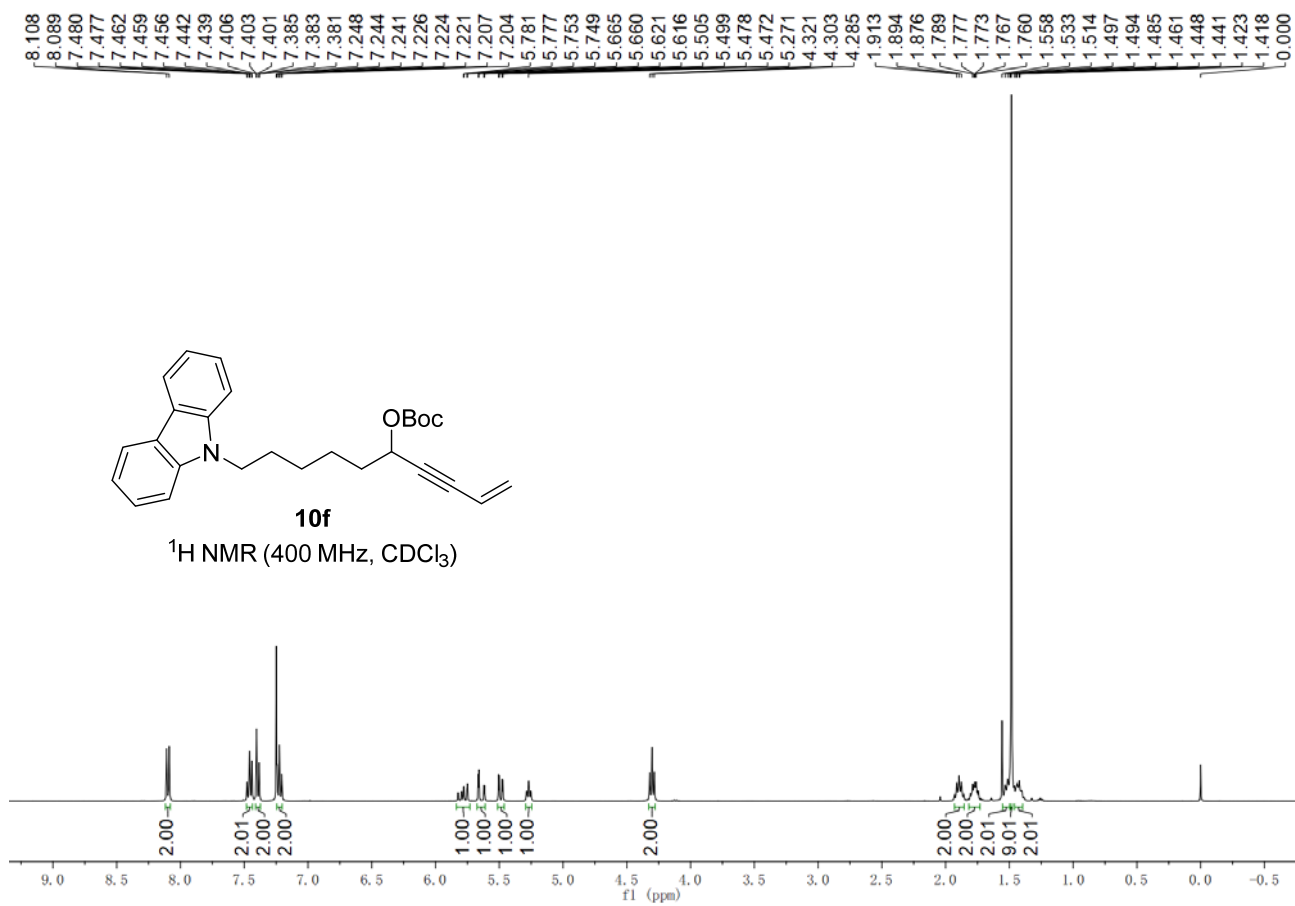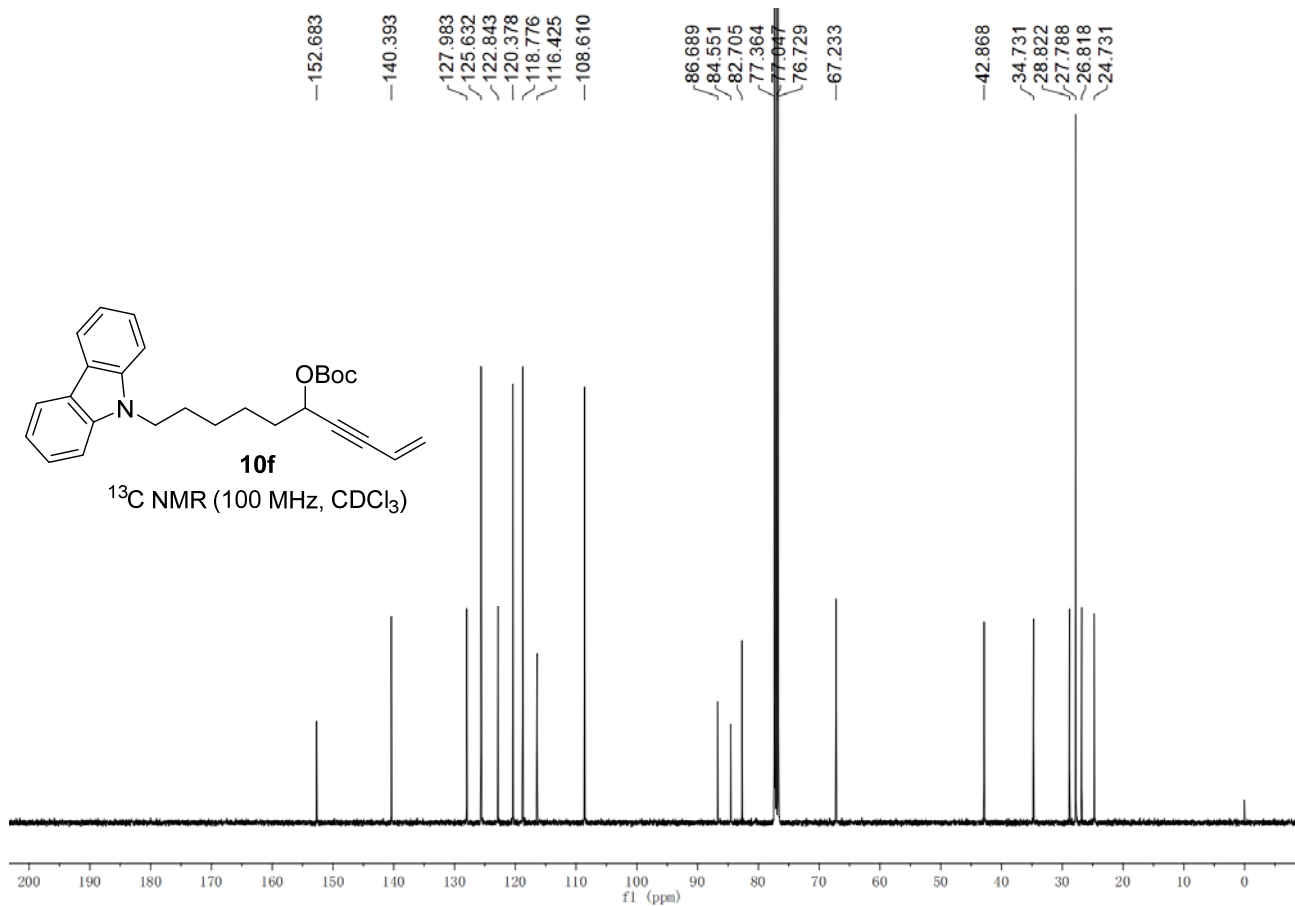

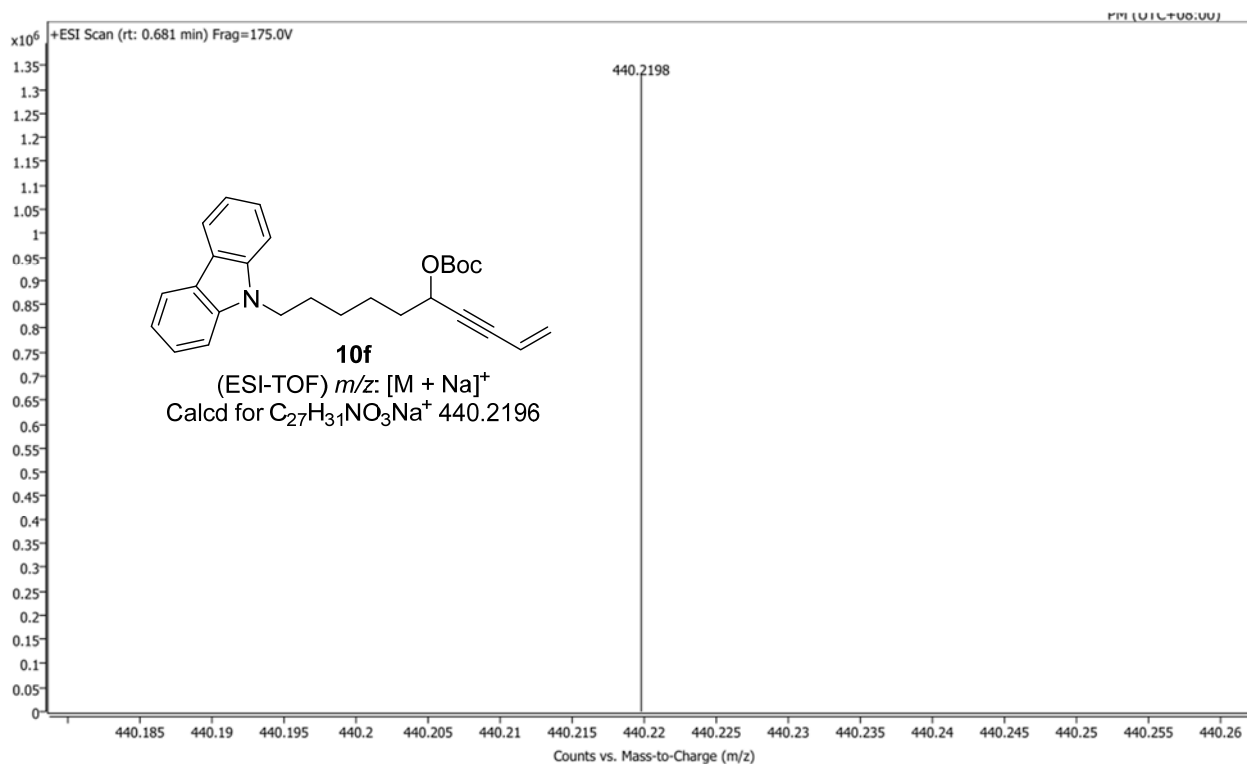

7.349  
7.344  
7.342  
7.339  
7.331  
7.322  
7.318  
7.295  
7.288  
7.285  
7.283  
7.276  
7.274  
7.258  
5.807  
5.803  
5.791  
5.786  
5.763  
5.759  
5.672  
5.667  
5.628  
5.623  
5.510  
5.504  
5.482  
5.477  
5.350  
5.346  
5.334  
5.329  
5.317  
5.313  
4.503  
3.531  
3.515  
3.500  
1.942  
1.940  
1.934  
1.929  
1.927  
1.924  
1.917  
1.914  
1.911  
1.902  
1.898  
1.817  
1.812  
1.807  
1.801  
1.796  
1.791  
1.780  
1.776  
1.492  
0.000

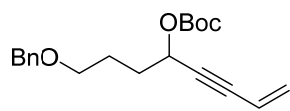

<sup>1</sup>H NMR (400 MHz, CDCl<sub>3</sub>)

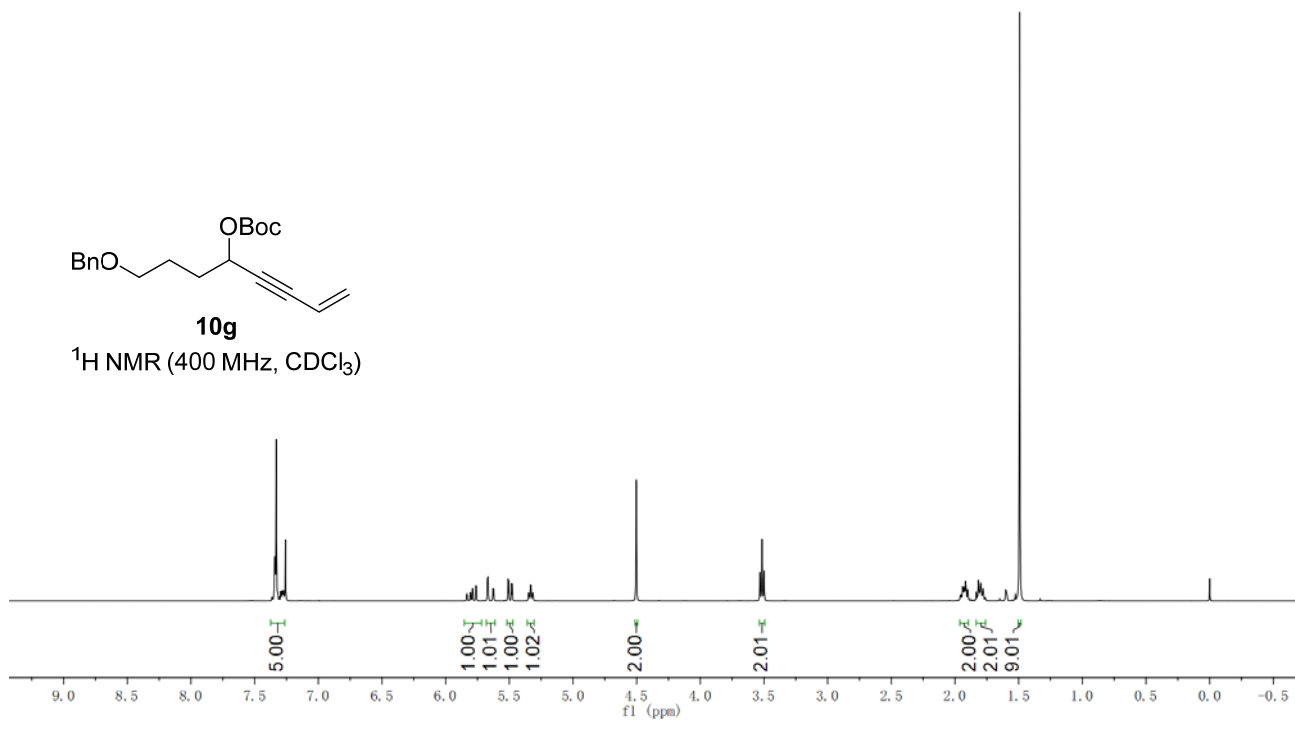

-152.658  
-138.460  
-128.389  
-127.938  
-127.624  
-127.563  
-116.467  
86.668  
84.575  
82.655  
77.362  
77.045  
76.728  
72.901  
69.572  
67.203  
31.791  
27.783  
25.341

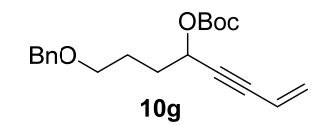

<sup>13</sup>C NMR (100 MHz, CDCl<sub>3</sub>)

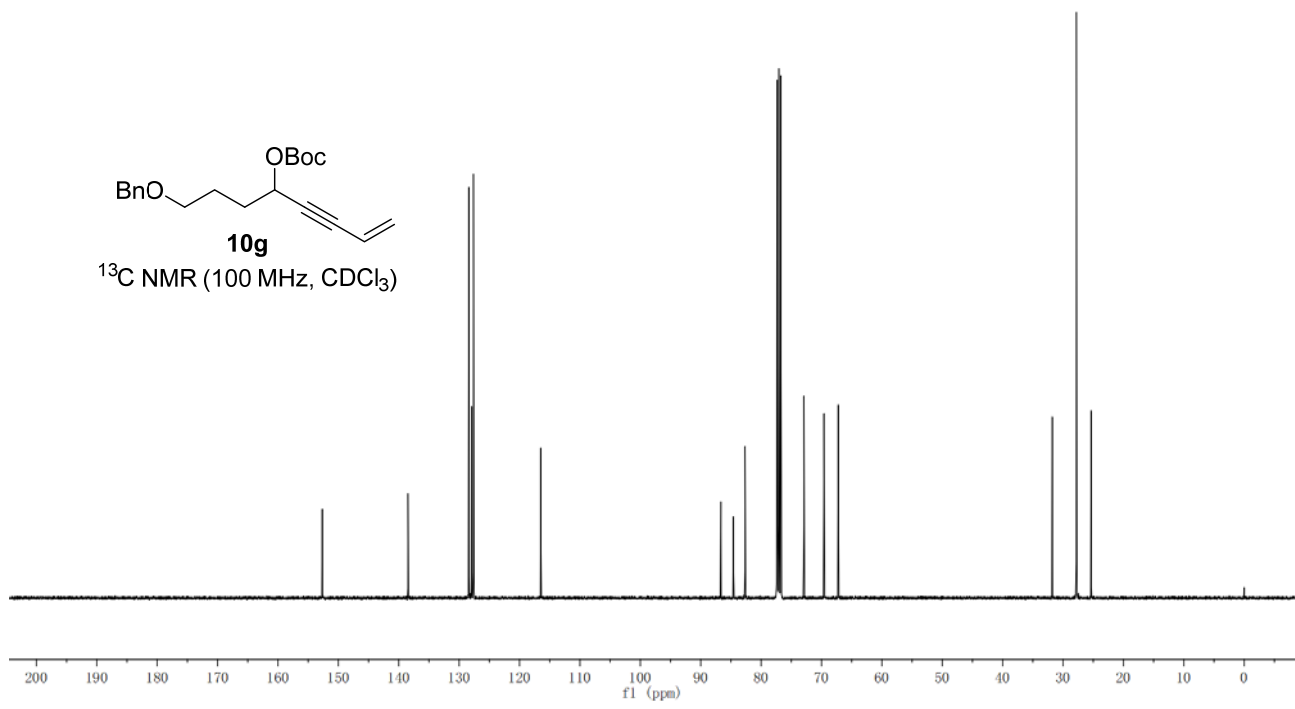



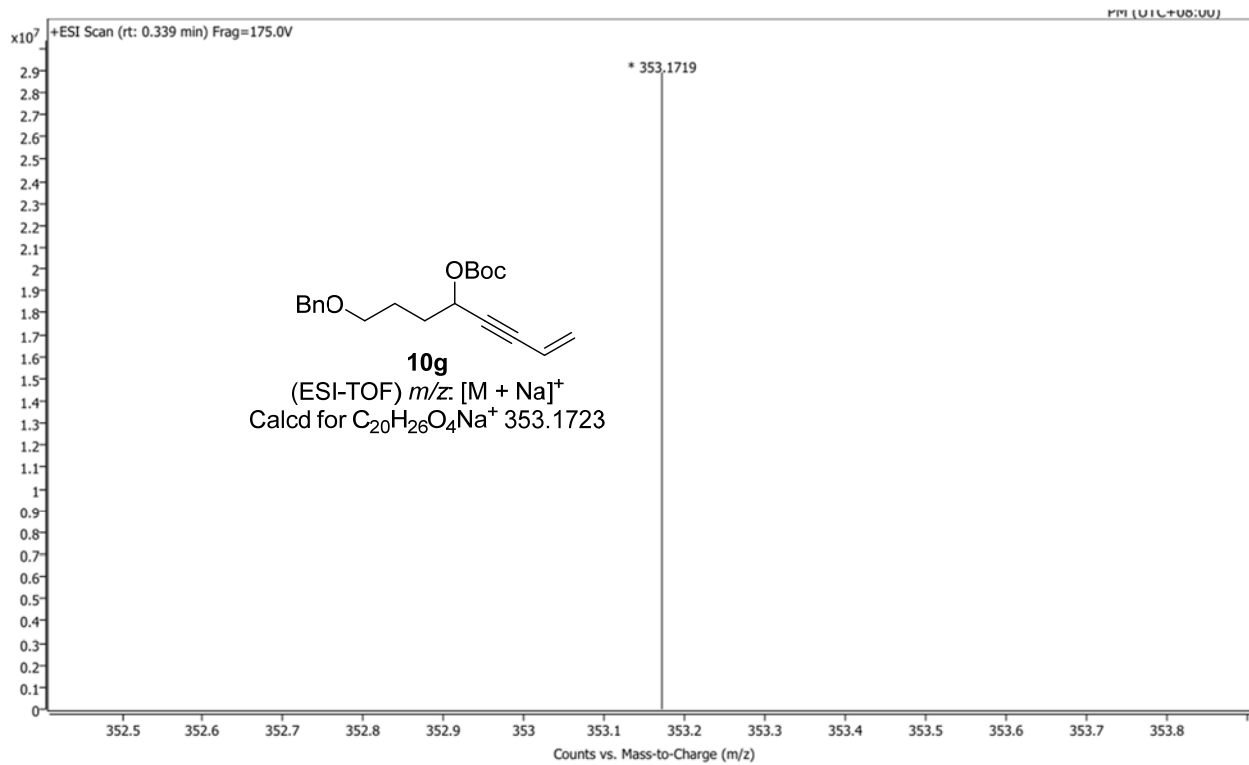

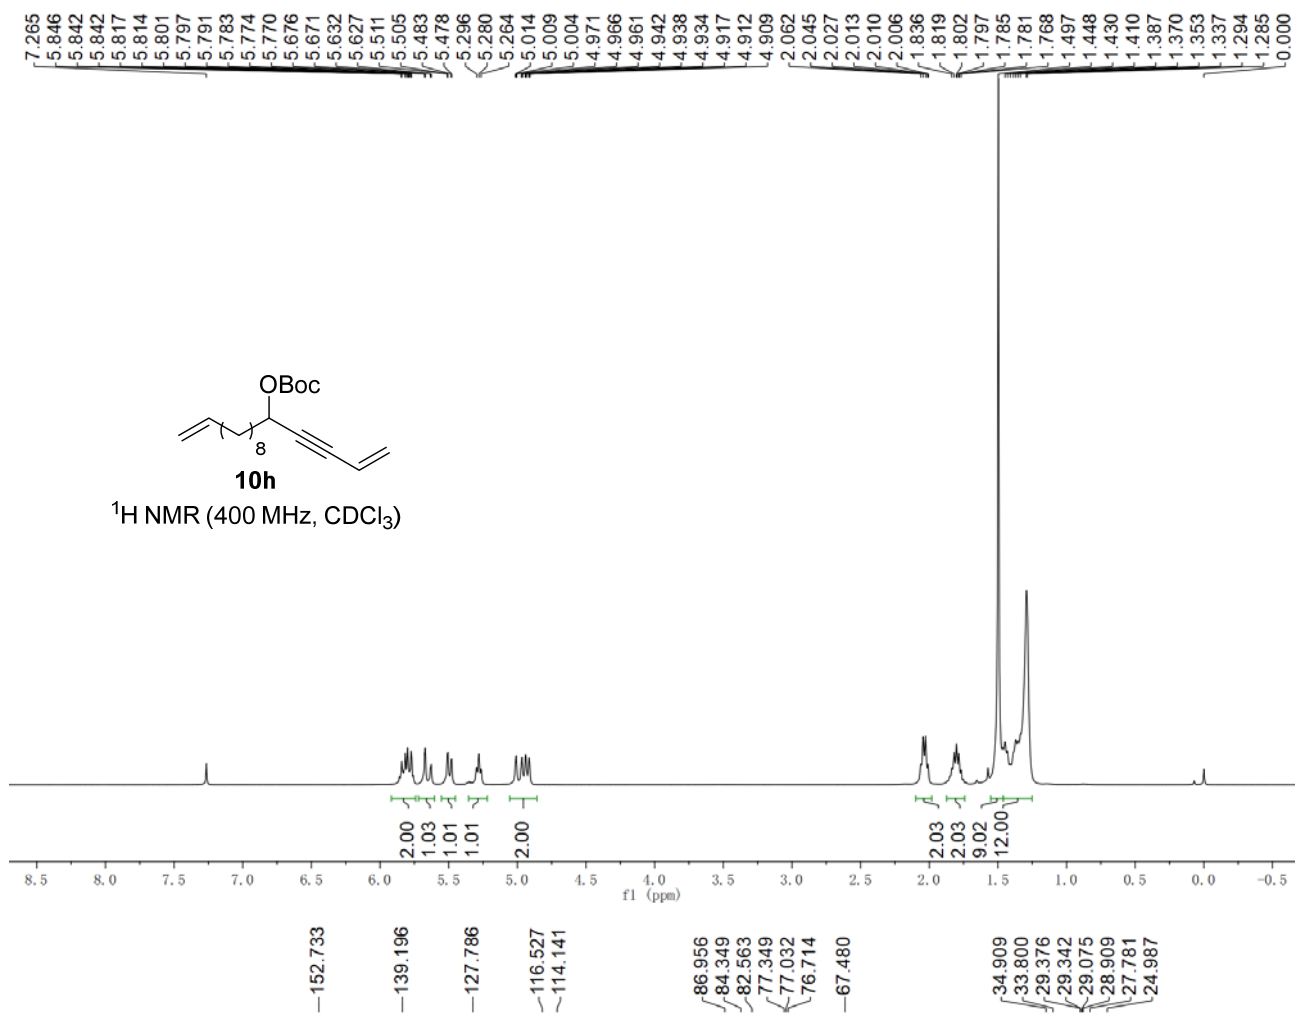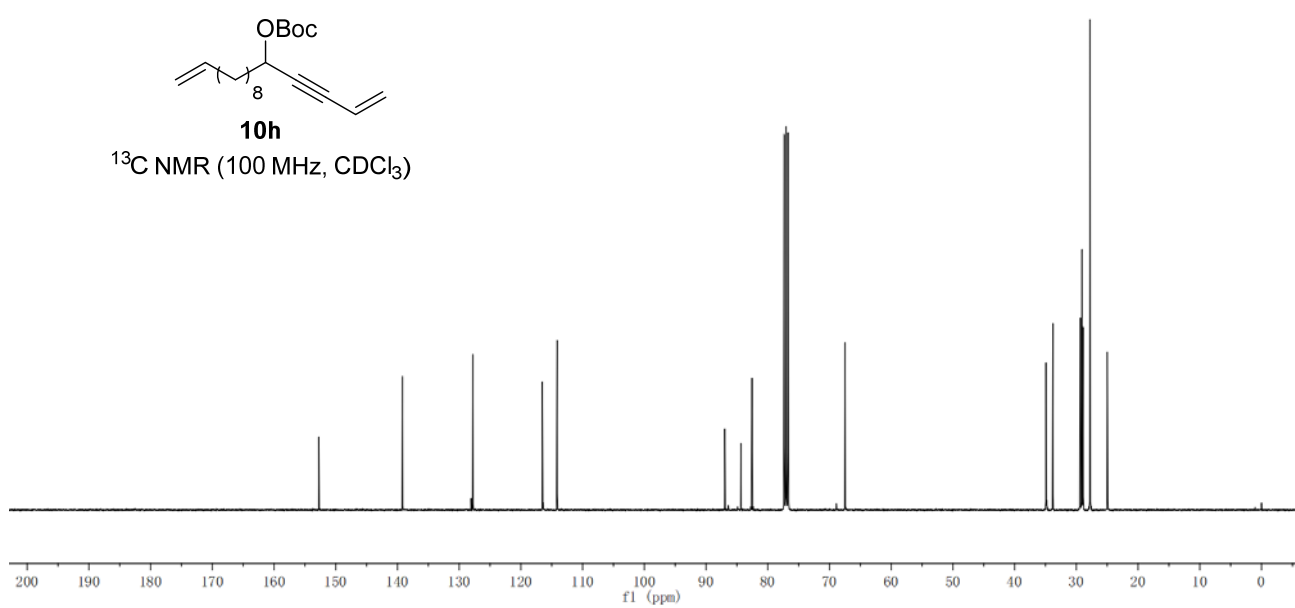

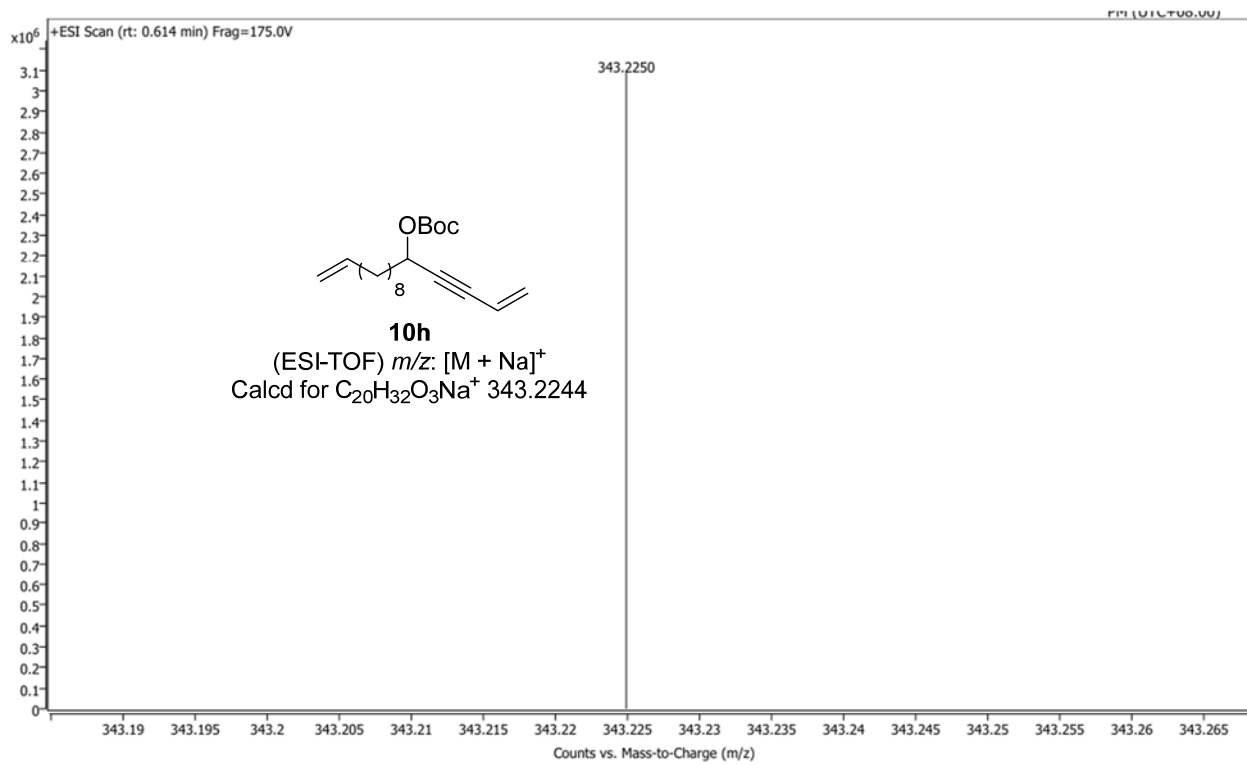

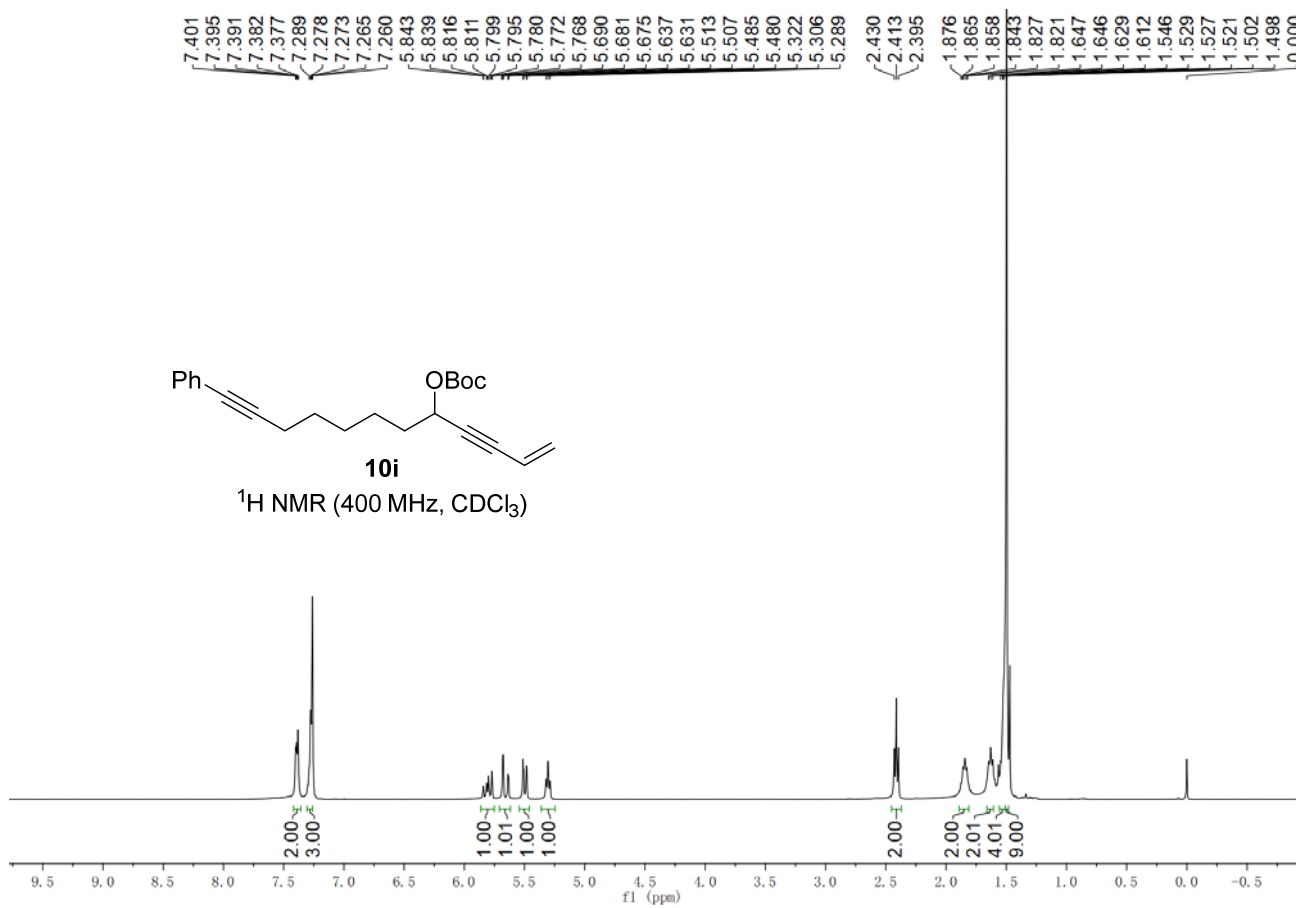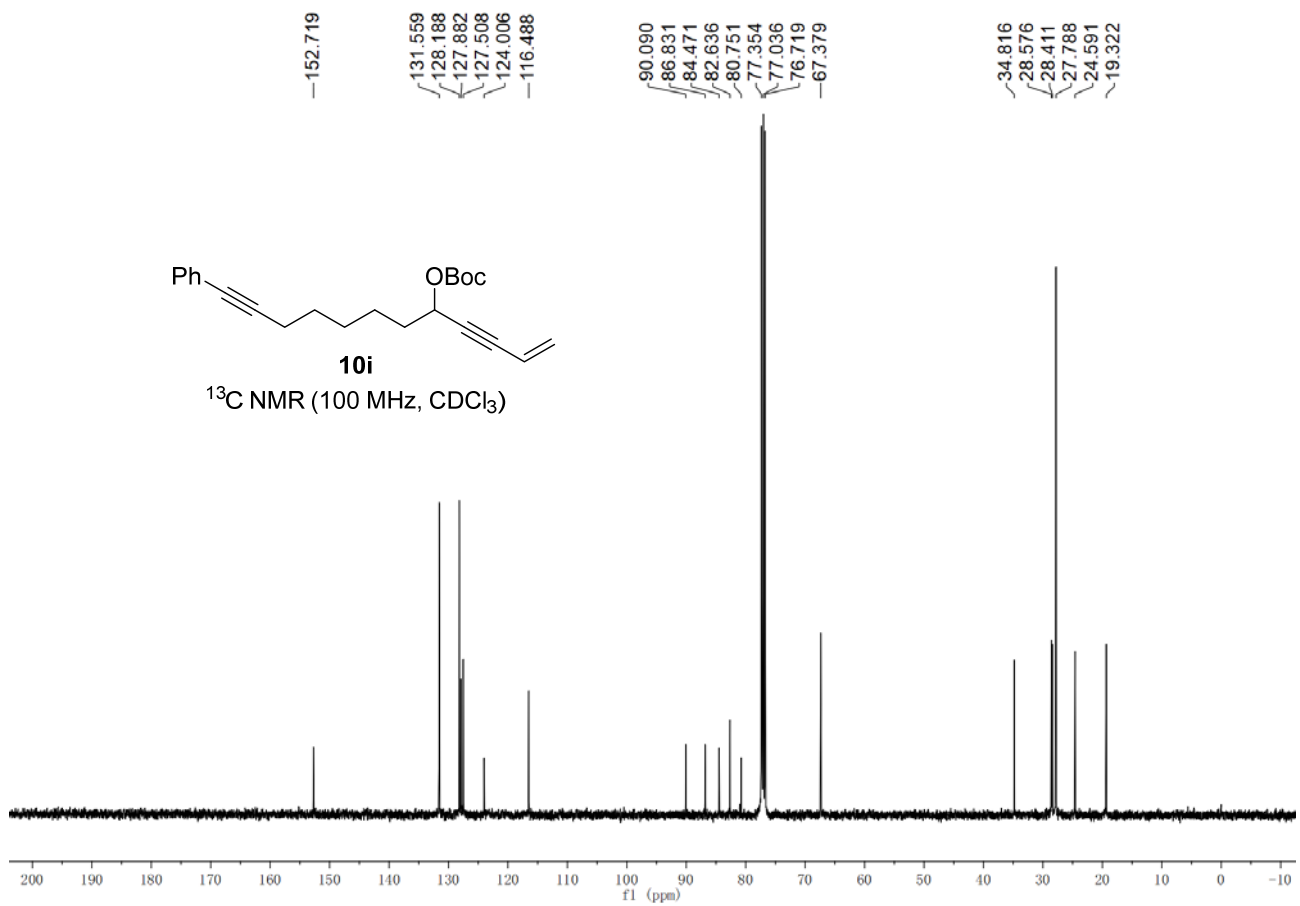

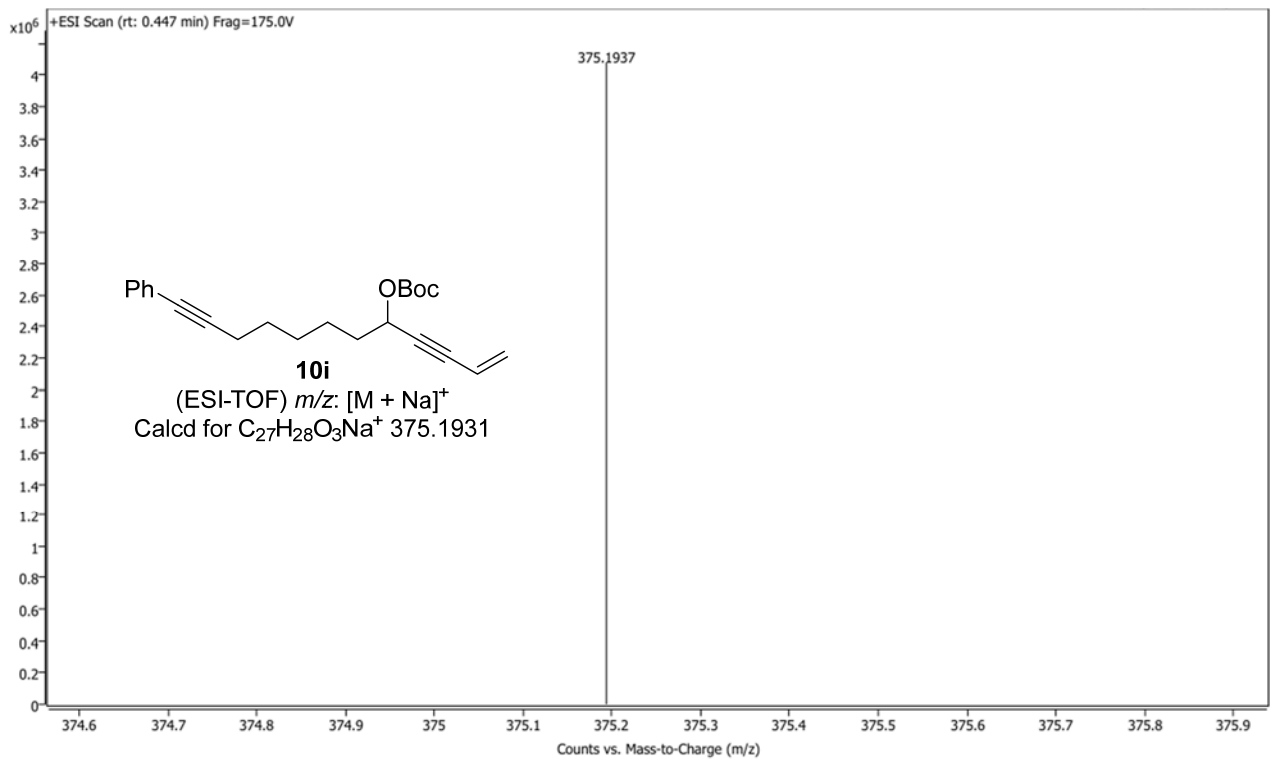

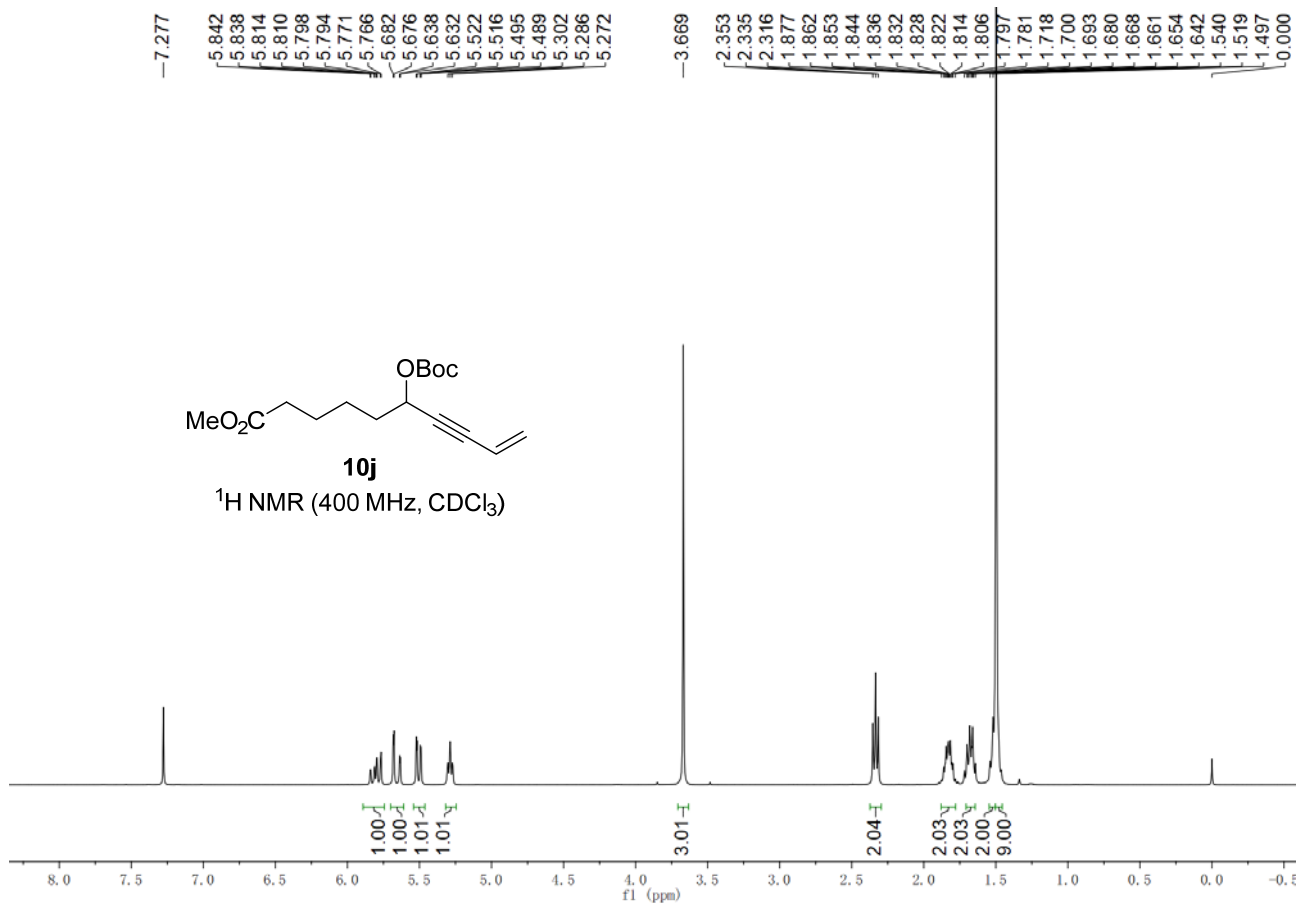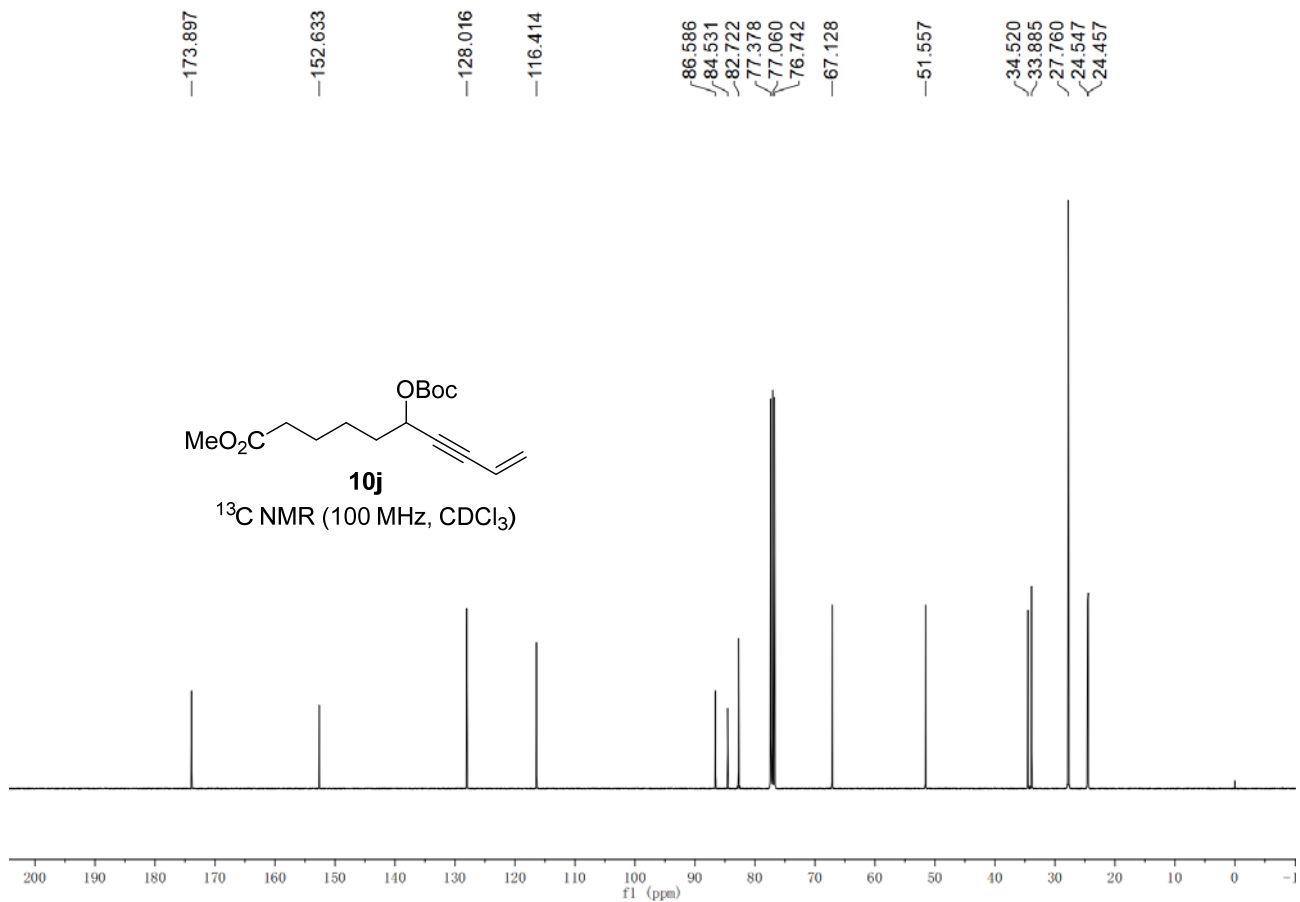

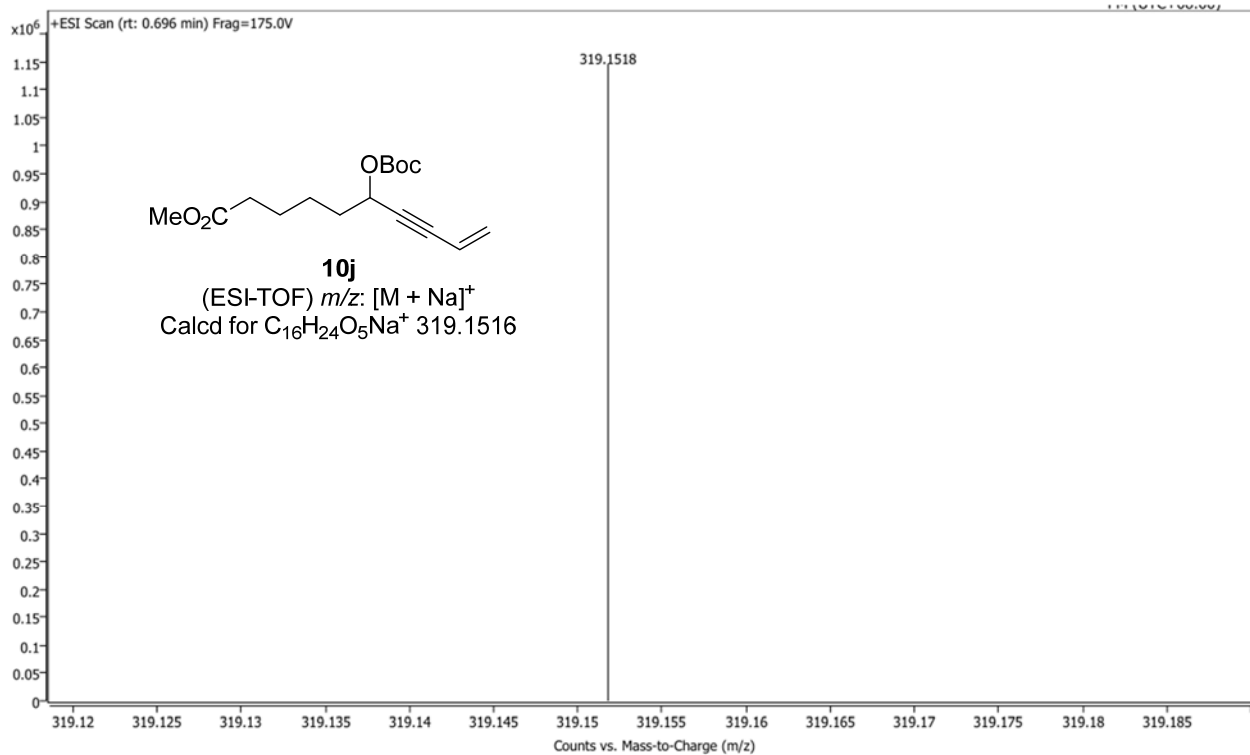

7.256  
5.681  
5.675  
5.514  
5.509  
5.487  
5.481  
5.311  
3.644  
3.628  
3.611  
2.564  
2.154  
2.111  
2.074  
1.826  
1.811  
1.805  
1.793  
1.775  
1.758  
1.573  
1.560  
1.555  
1.546  
1.538  
1.527  
1.522  
1.499  
1.383  
1.378  
1.368  
1.292  
1.285  
1.278  
1.264  
1.255  
1.255  
1.246  
1.241  
1.234  
1.224  
1.160  
1.148  
1.142  
1.136  
1.131  
1.125  
1.120  
1.081  
1.075  
1.063  
0.873  
0.857  
0.849  
0.839  
0.832  
0.000

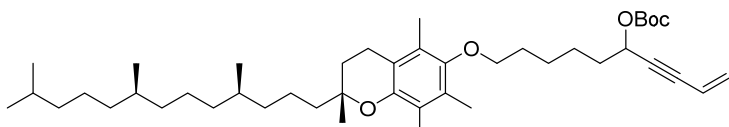

**10k**

<sup>1</sup>H NMR (400 MHz, CDCl<sub>3</sub>)

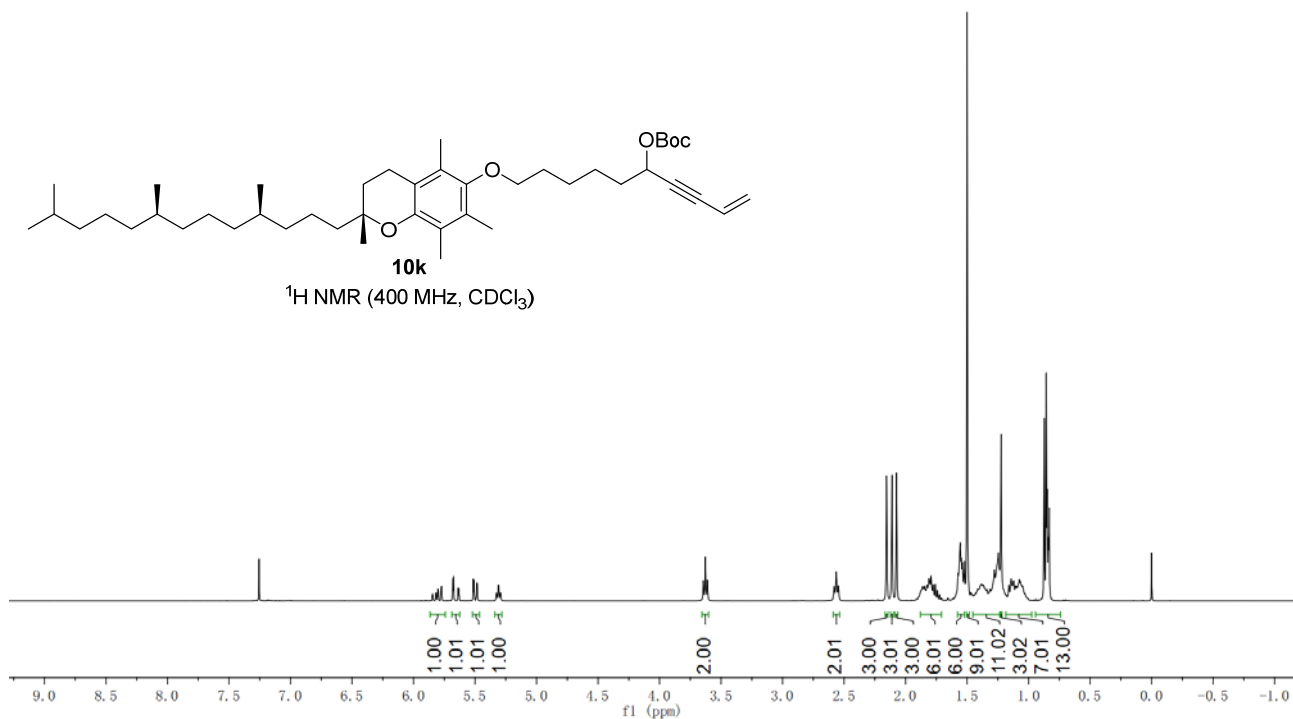

152.706  
148.319  
147.652  
127.862  
127.815  
125.787  
122.758  
117.456  
116.492  
86.850  
84.441  
82.606  
77.335 CDCl<sub>3</sub>  
77.018 CDCl<sub>3</sub>  
76.700 CDCl<sub>3</sub>  
74.736  
72.752  
67.390  
40.110  
40.074  
39.375  
37.391  
34.901  
32.798  
32.780  
32.704  
32.681  
31.303  
31.254  
30.159  
27.985  
27.779  
25.815  
24.945  
24.807  
24.445  
23.887  
22.730  
22.635  
21.052  
20.658  
19.756  
19.690  
12.744  
11.881  
11.786

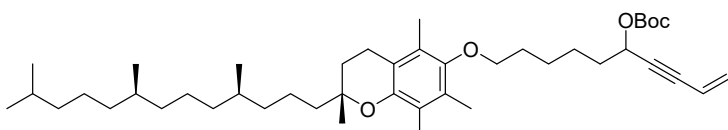

**10k**

<sup>13</sup>C NMR (100 MHz, CDCl<sub>3</sub>)

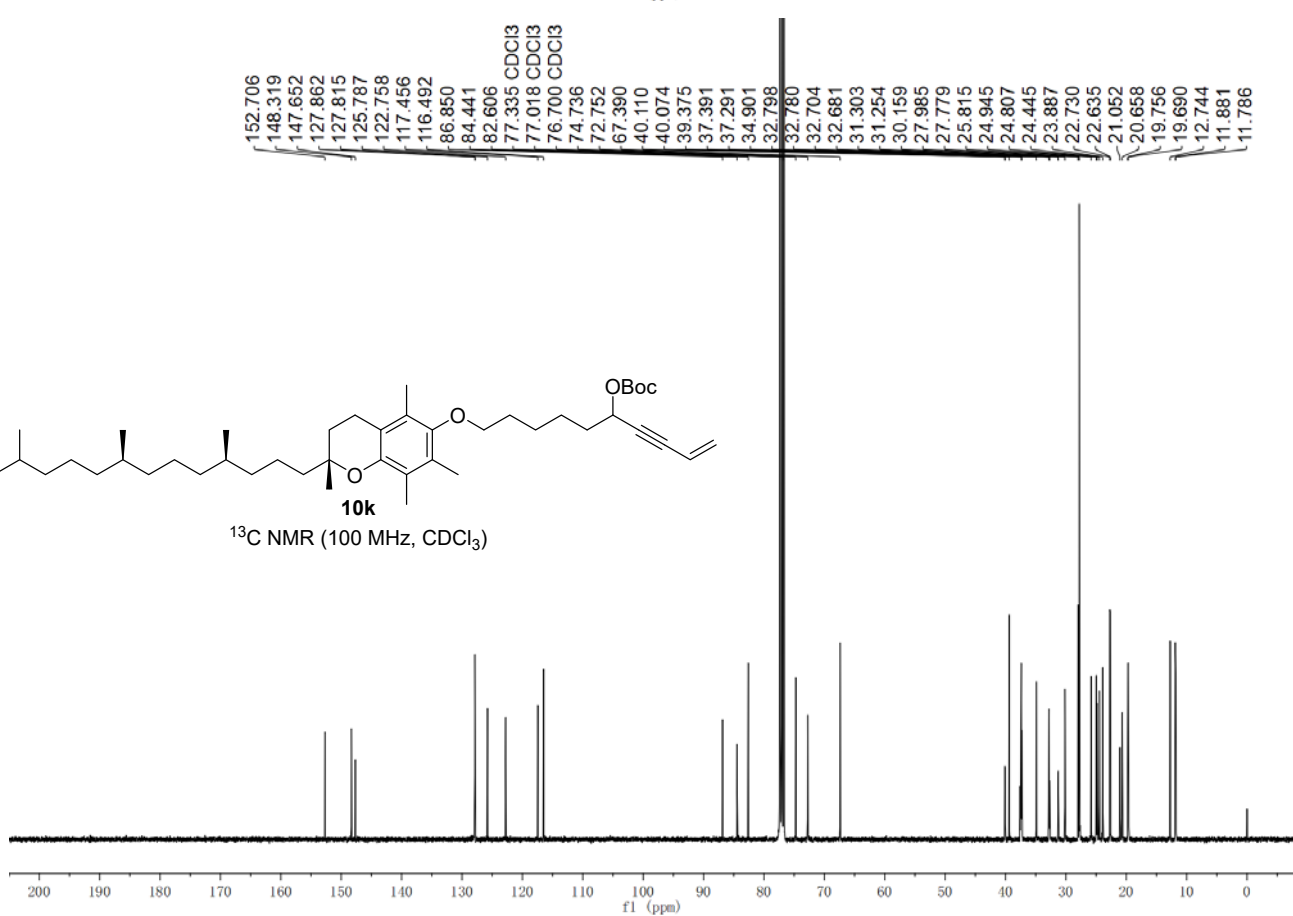



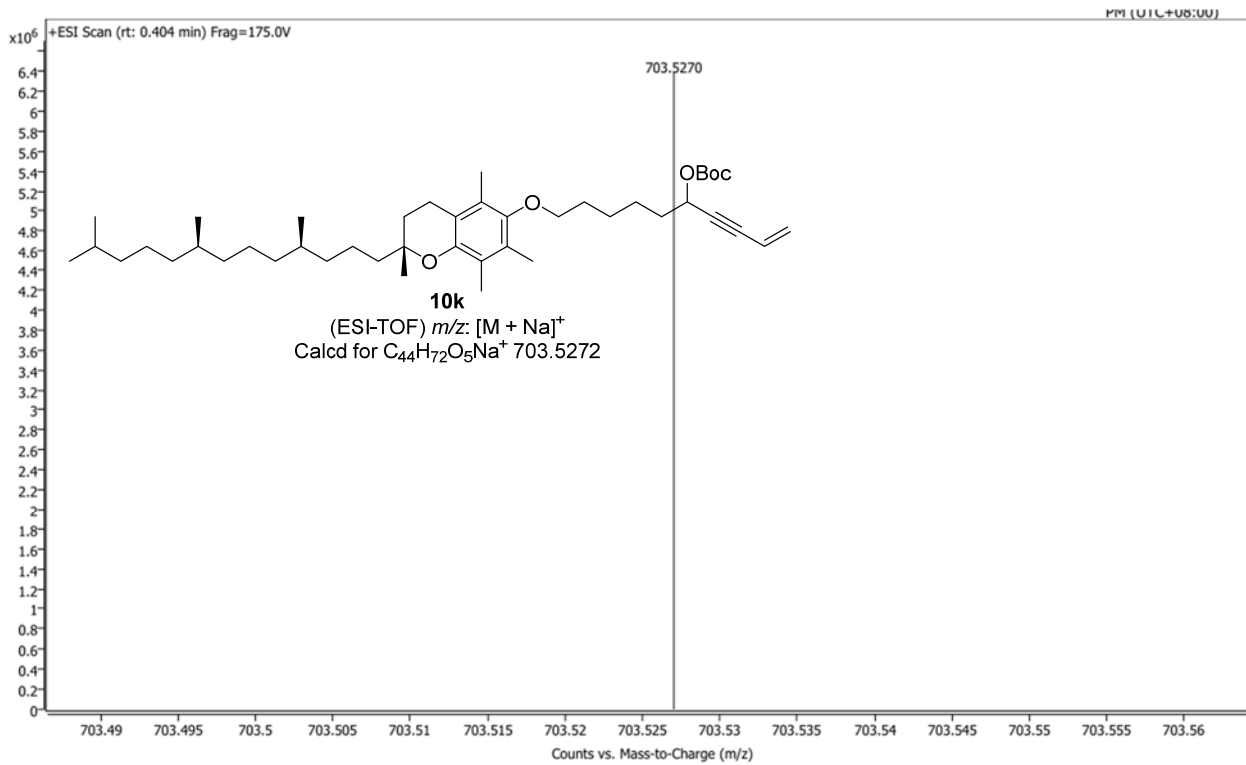

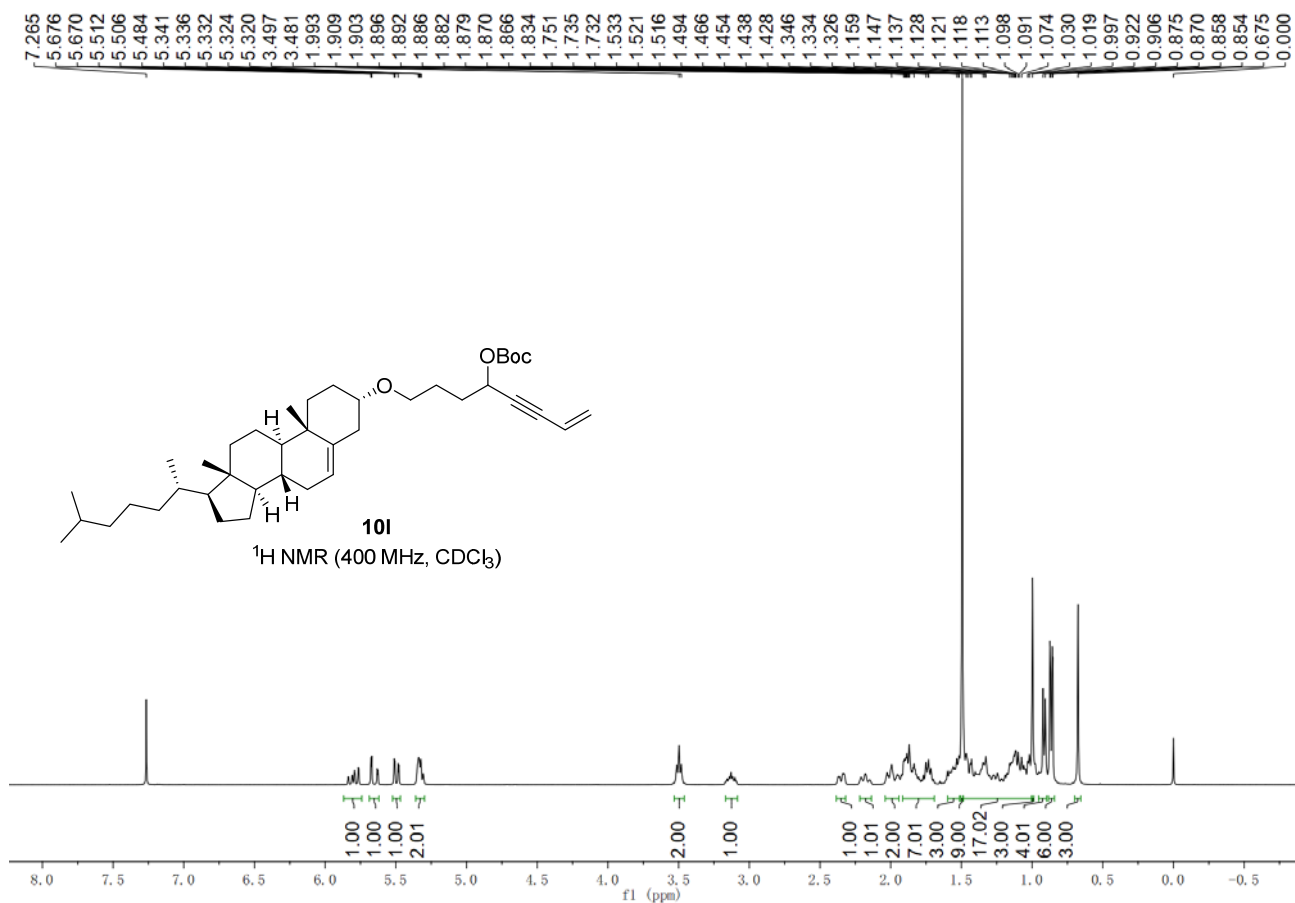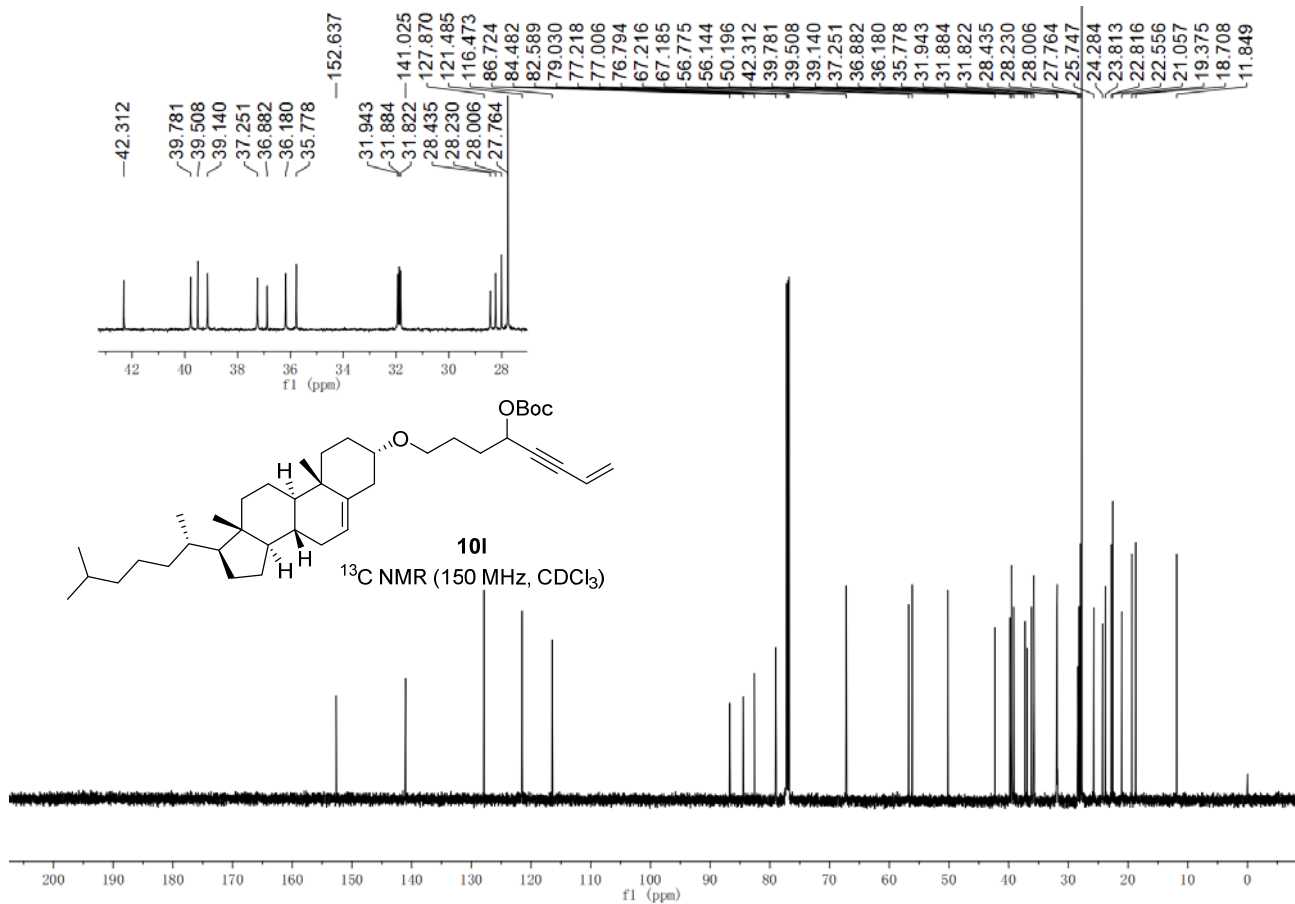

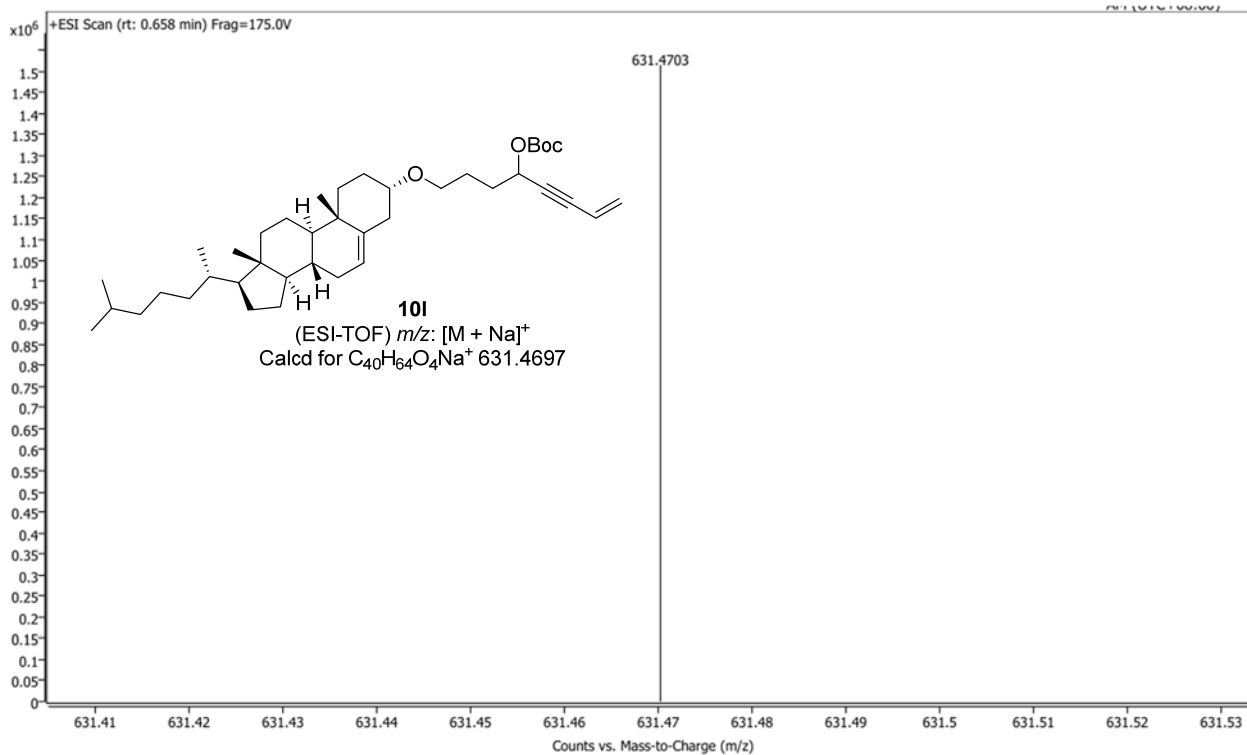

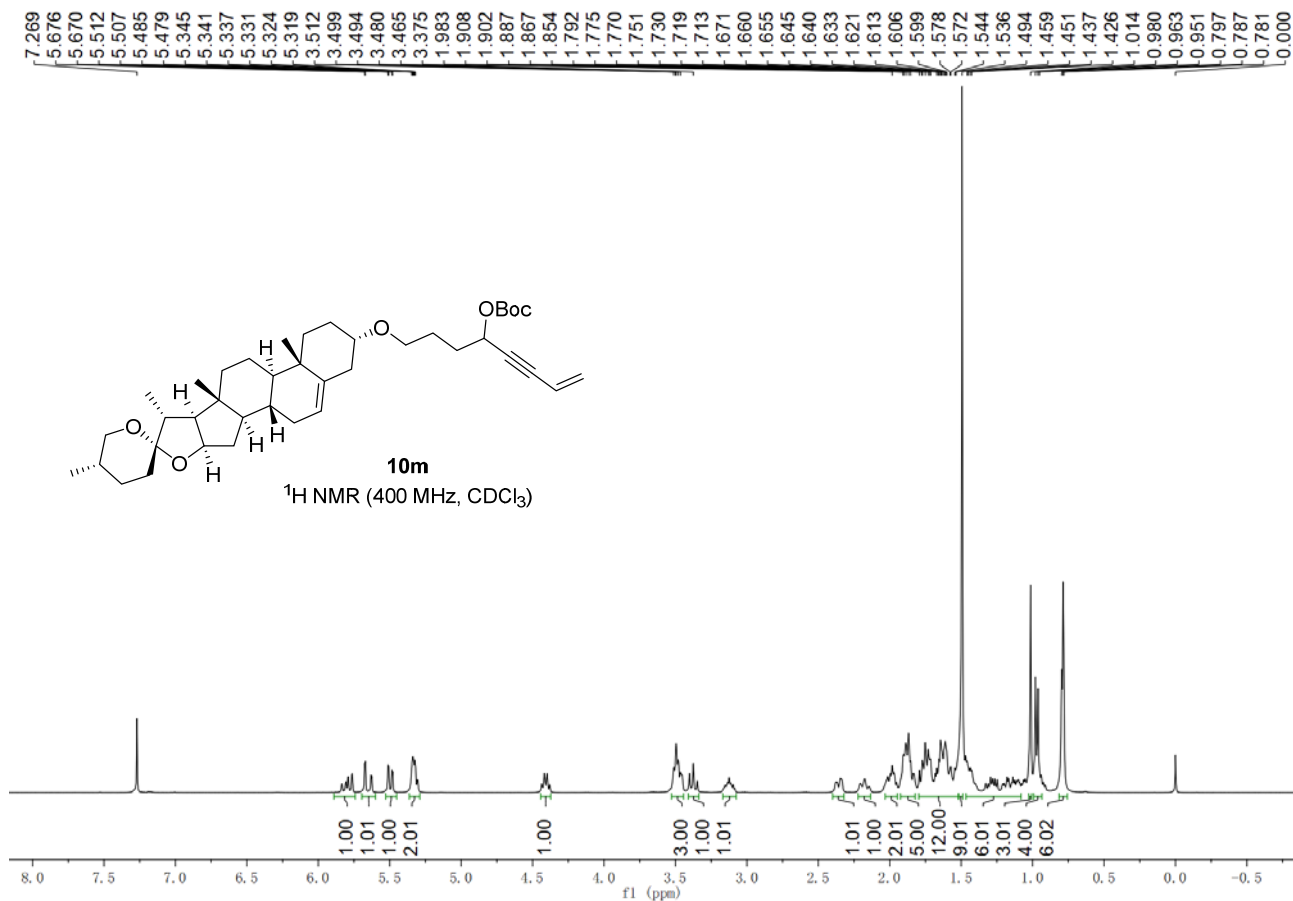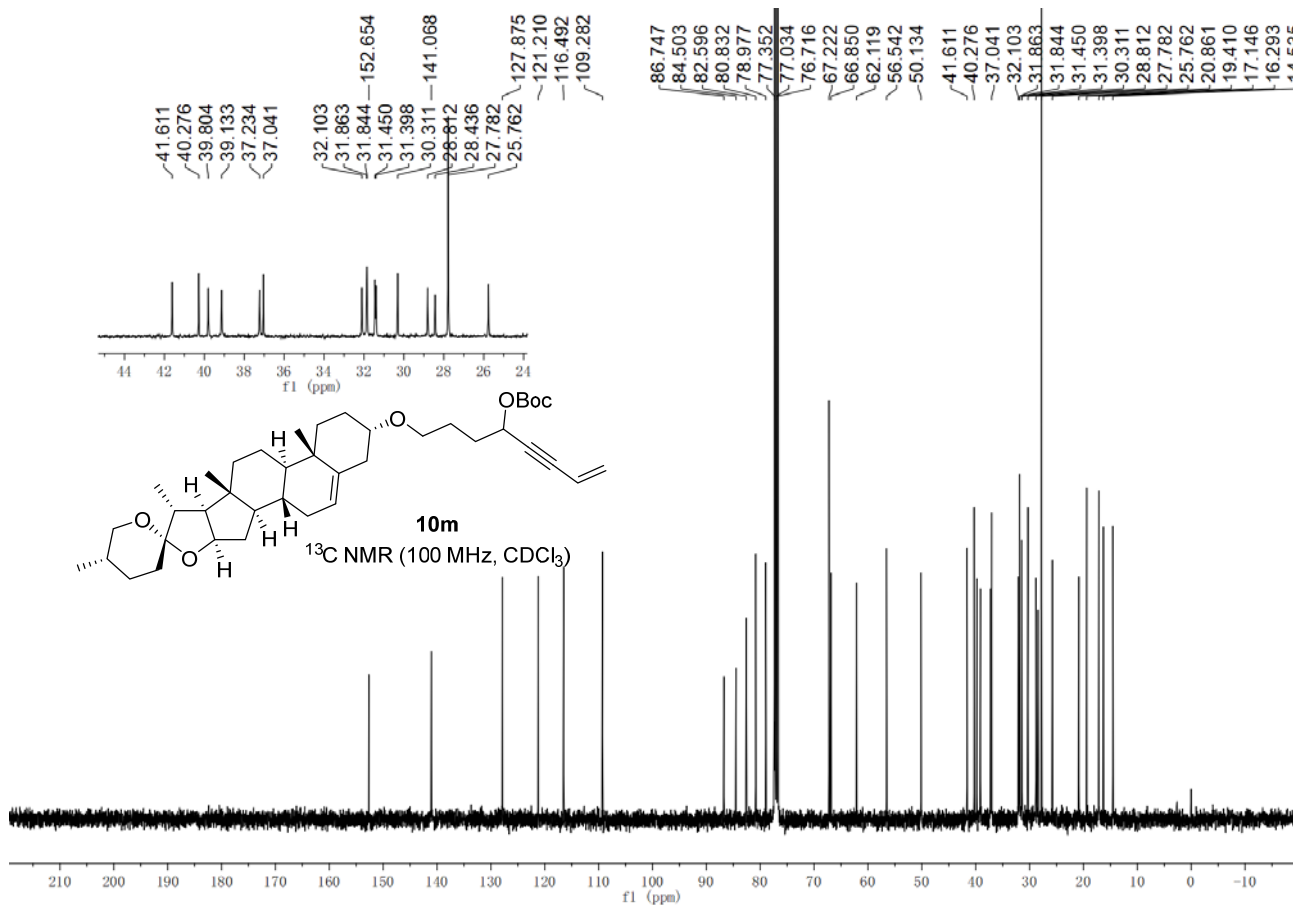

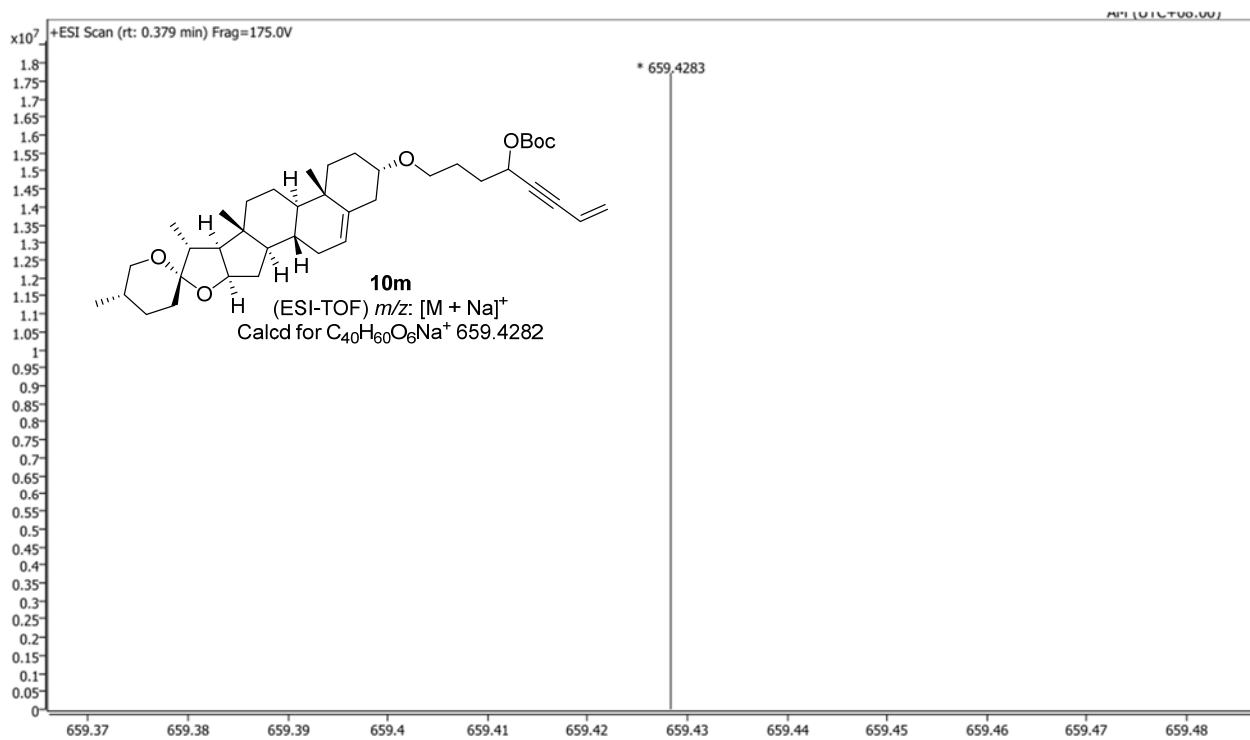

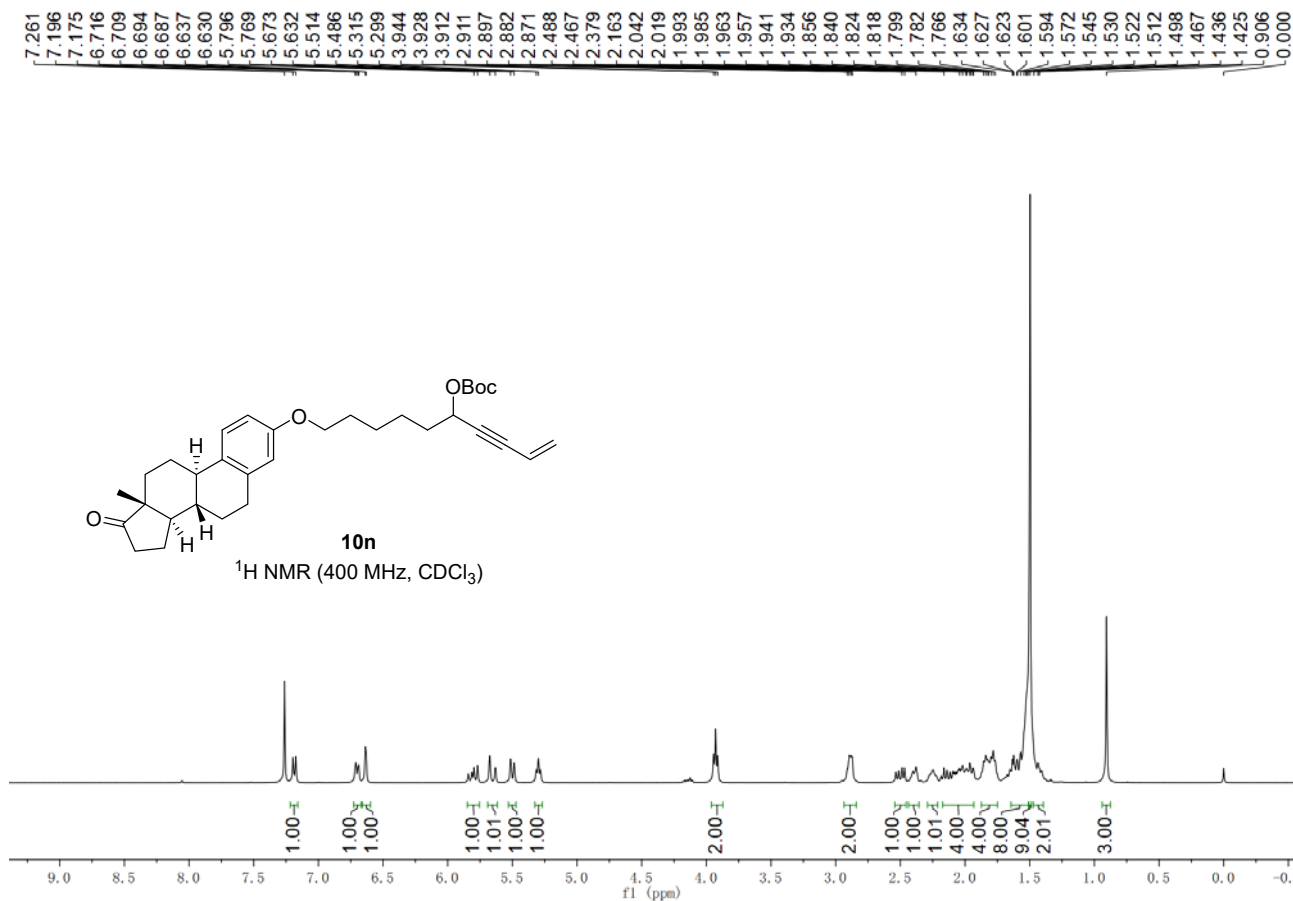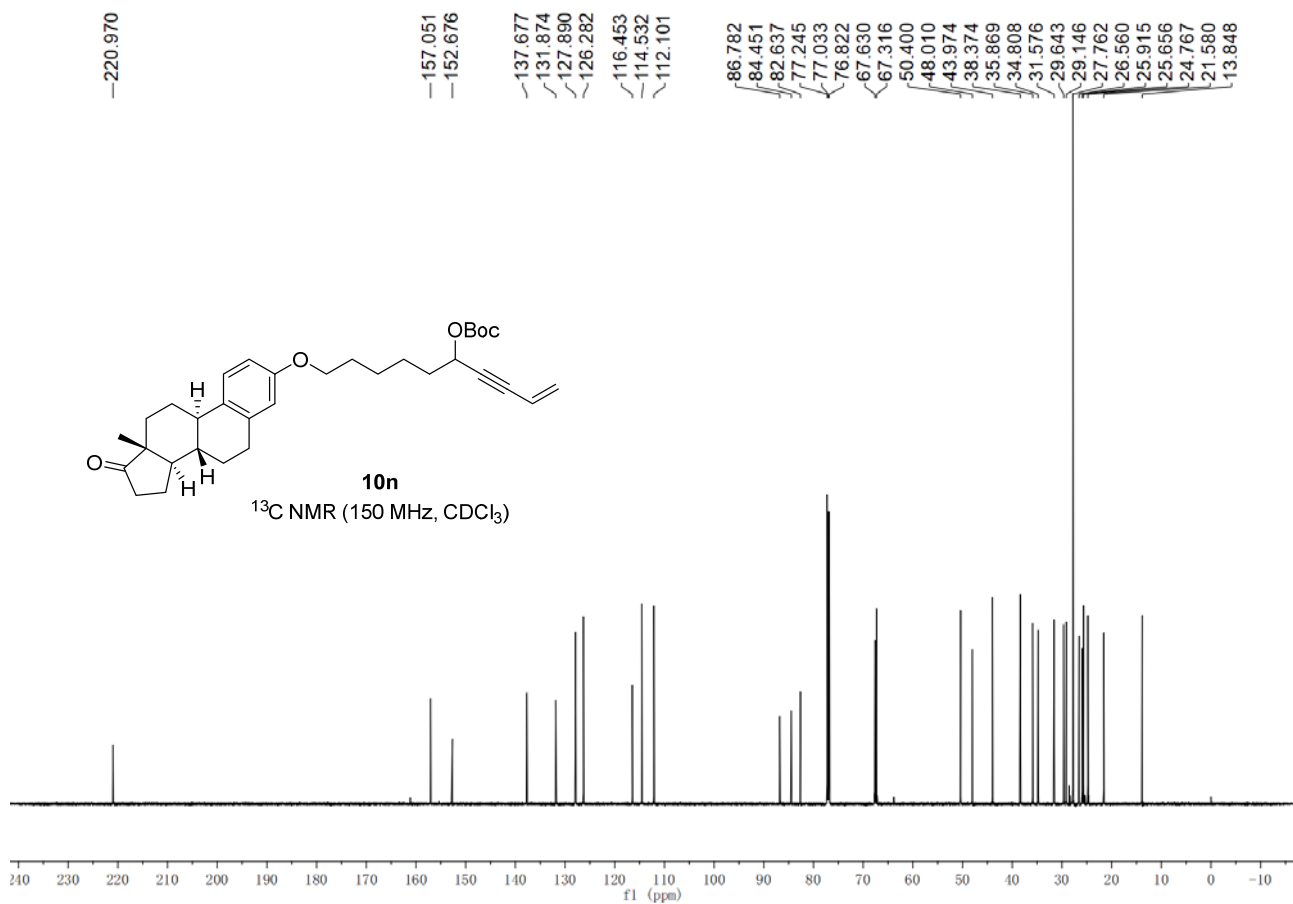

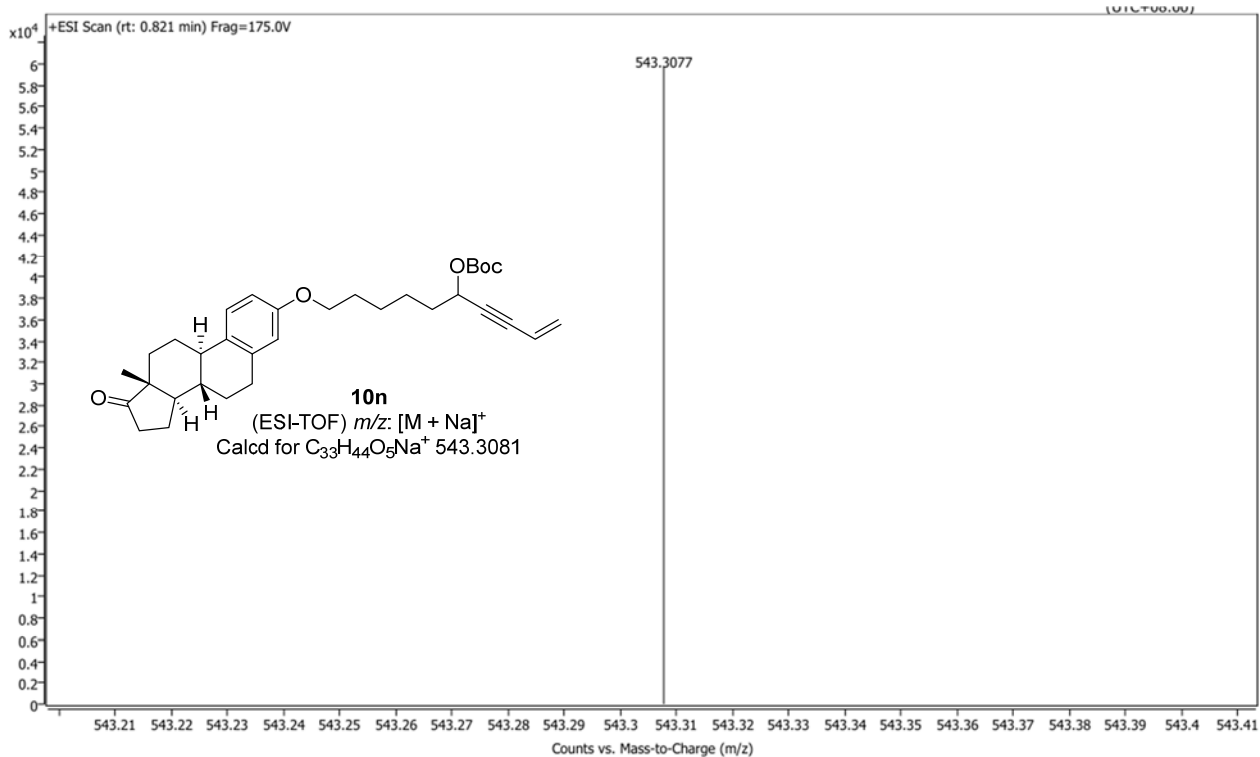

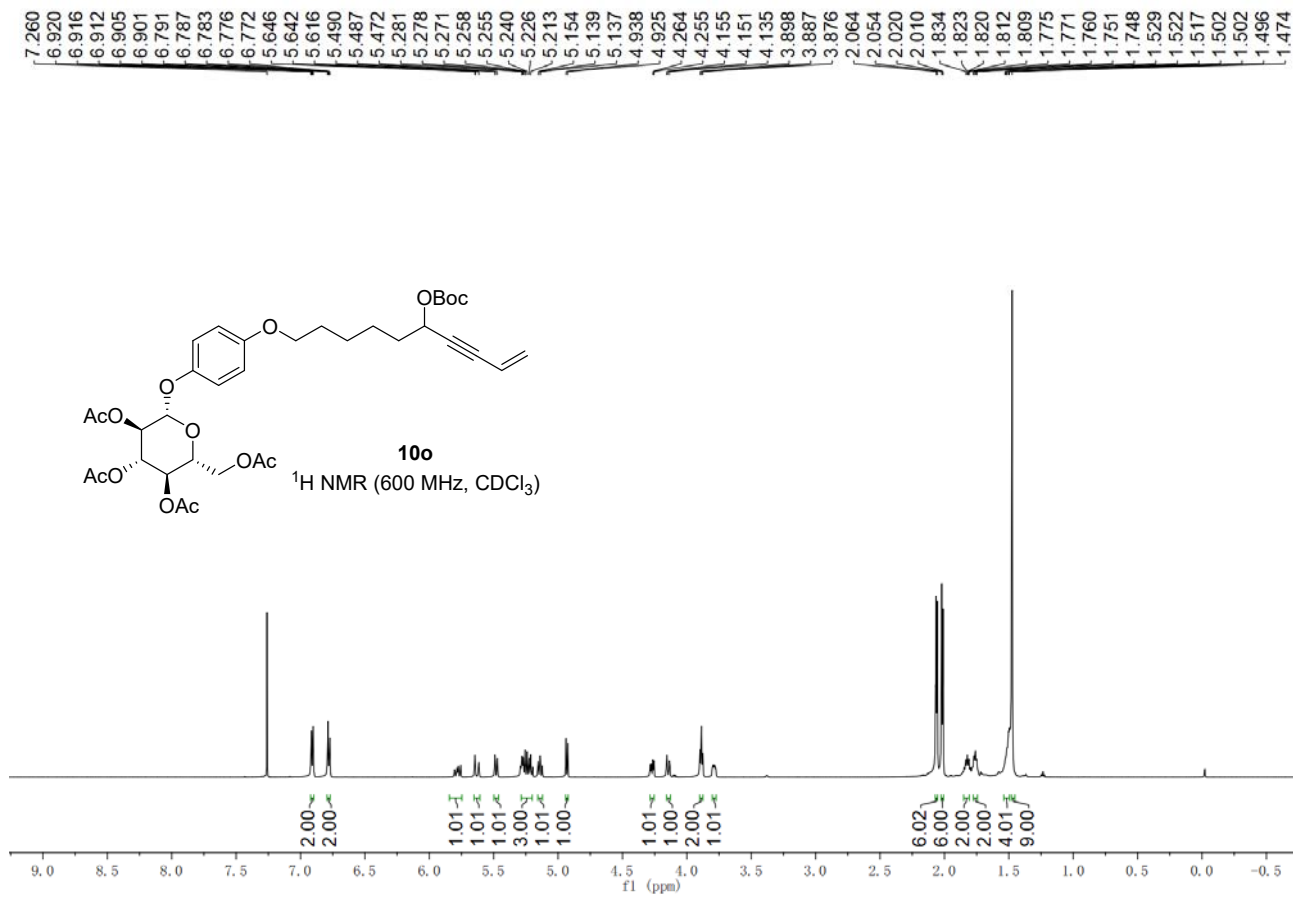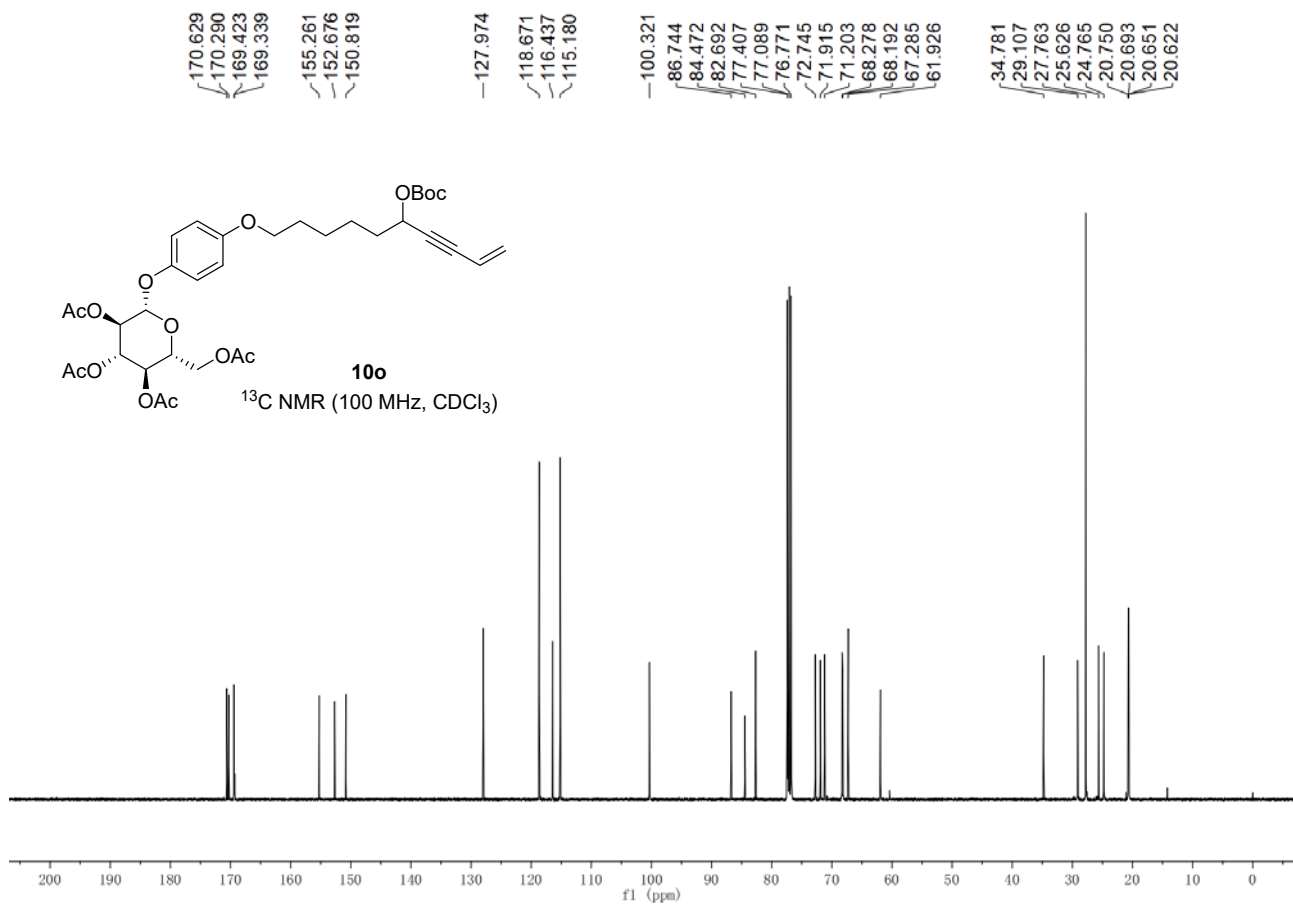



Spectrum from 20240817.wiff2 (sample 8) - 4, +TOF MS (600 - 800) from 0.063 to 0.113 min, noise filtered (noise multiplier = 1.5), Gaussian smoothed (0.5 points), centroided

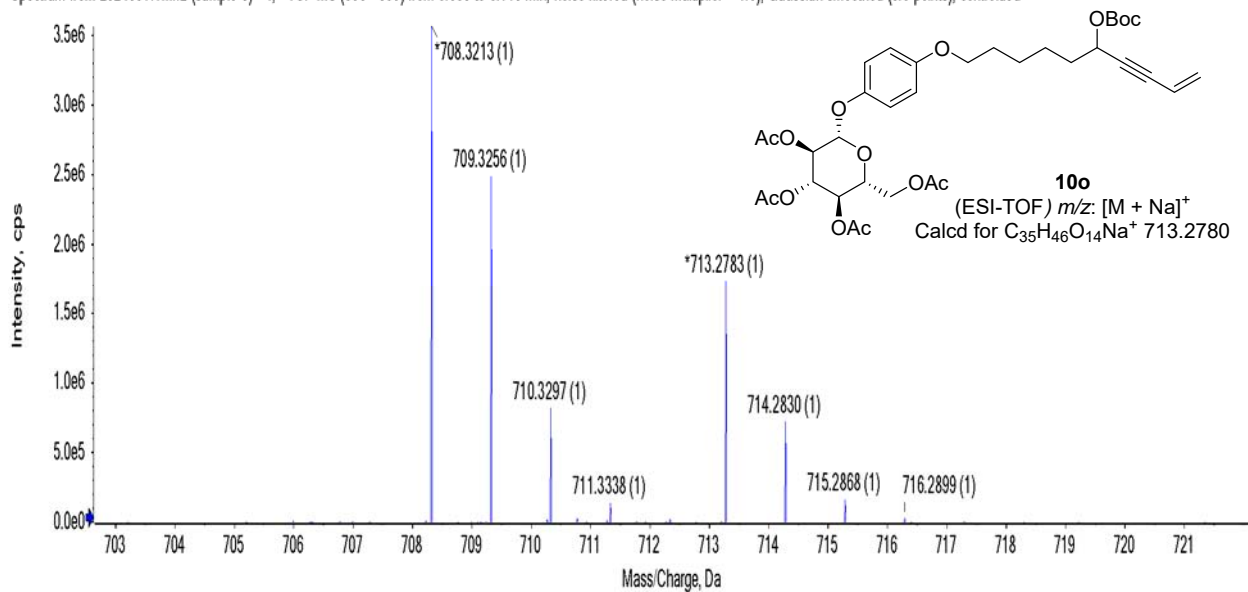

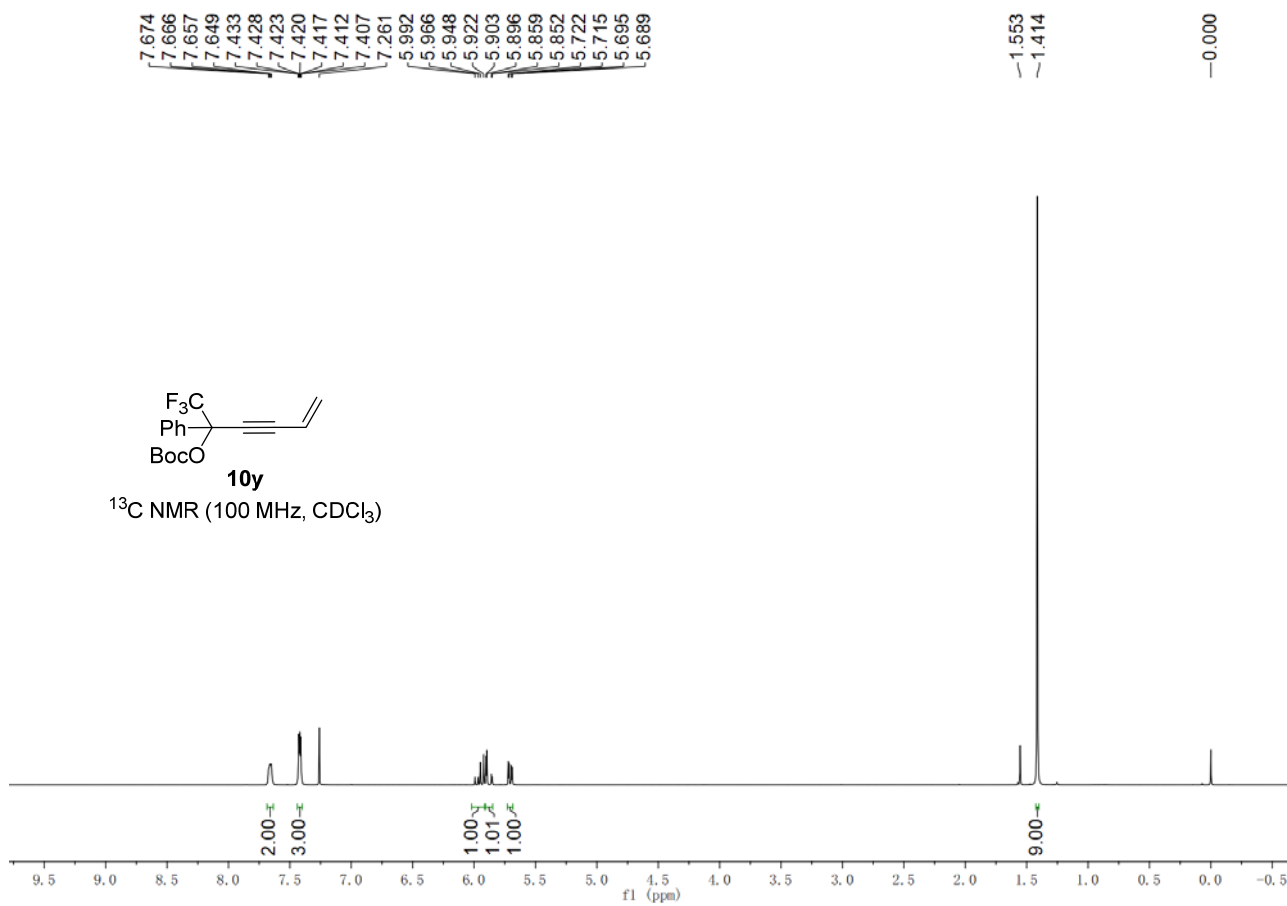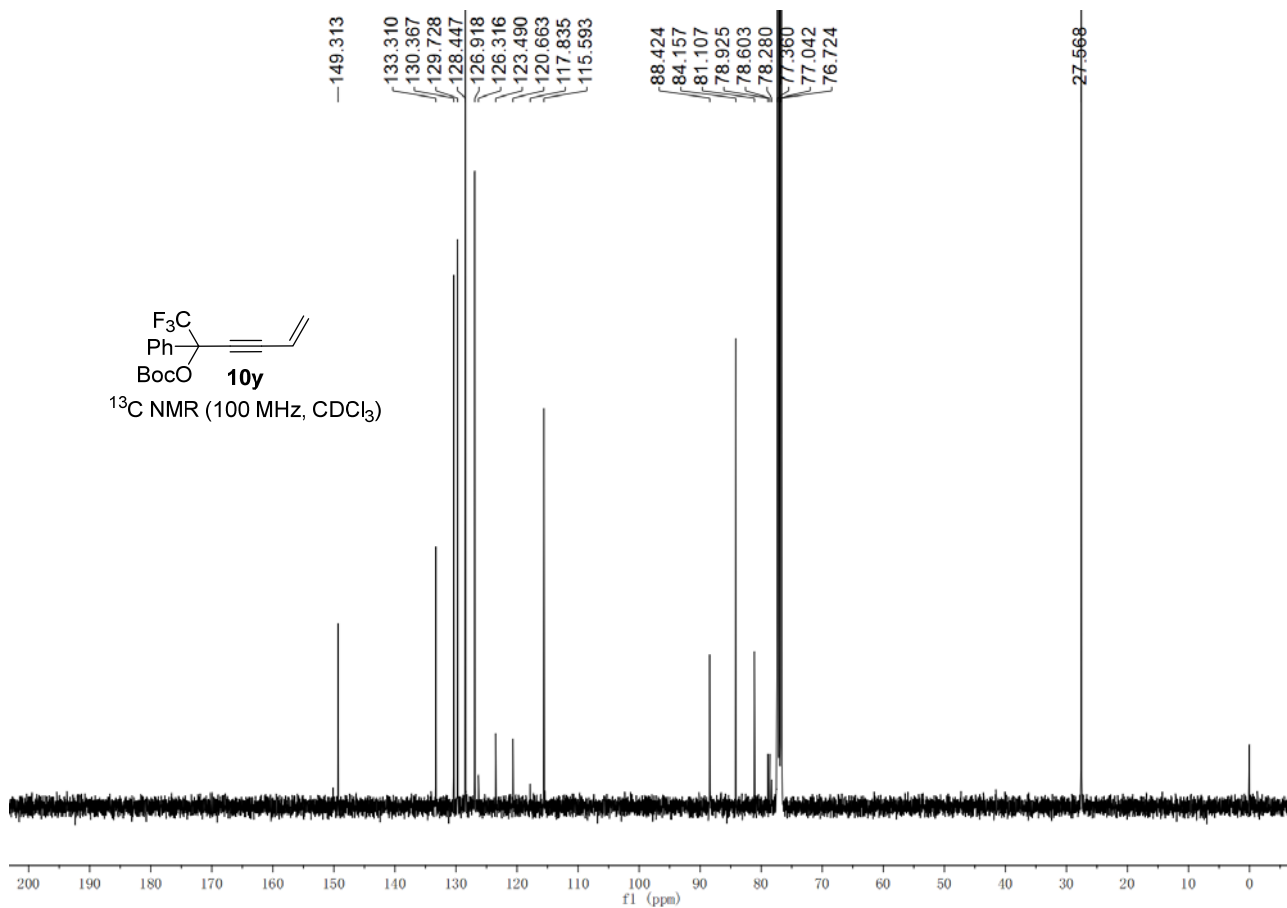

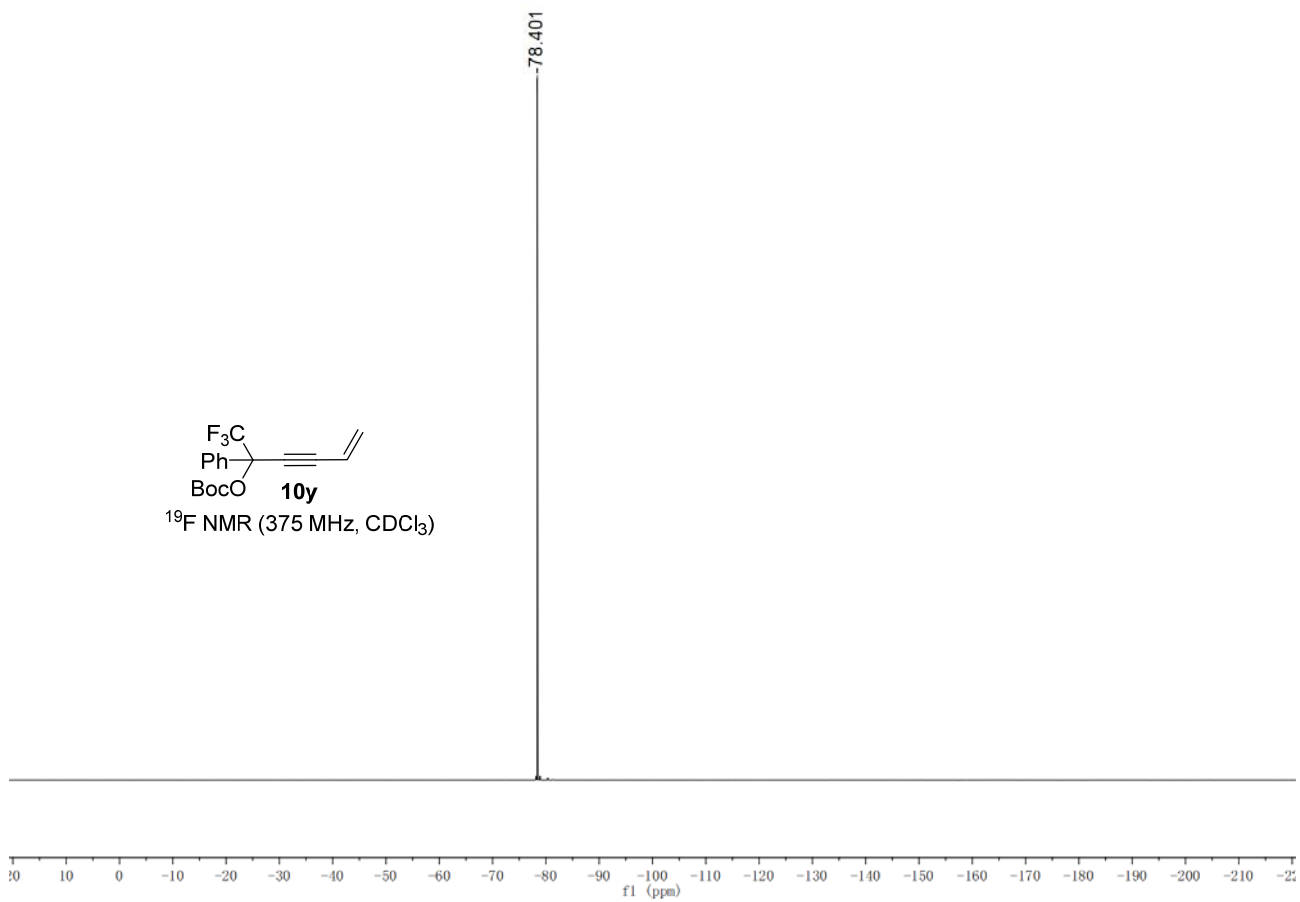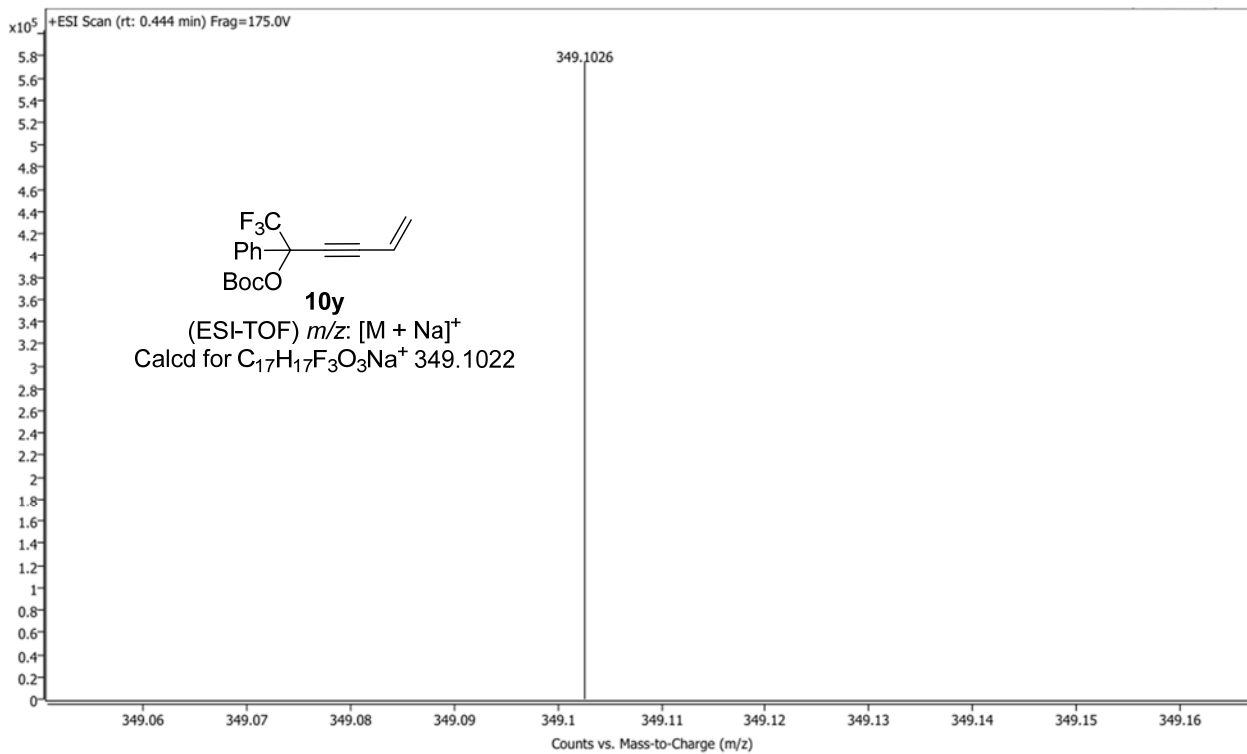

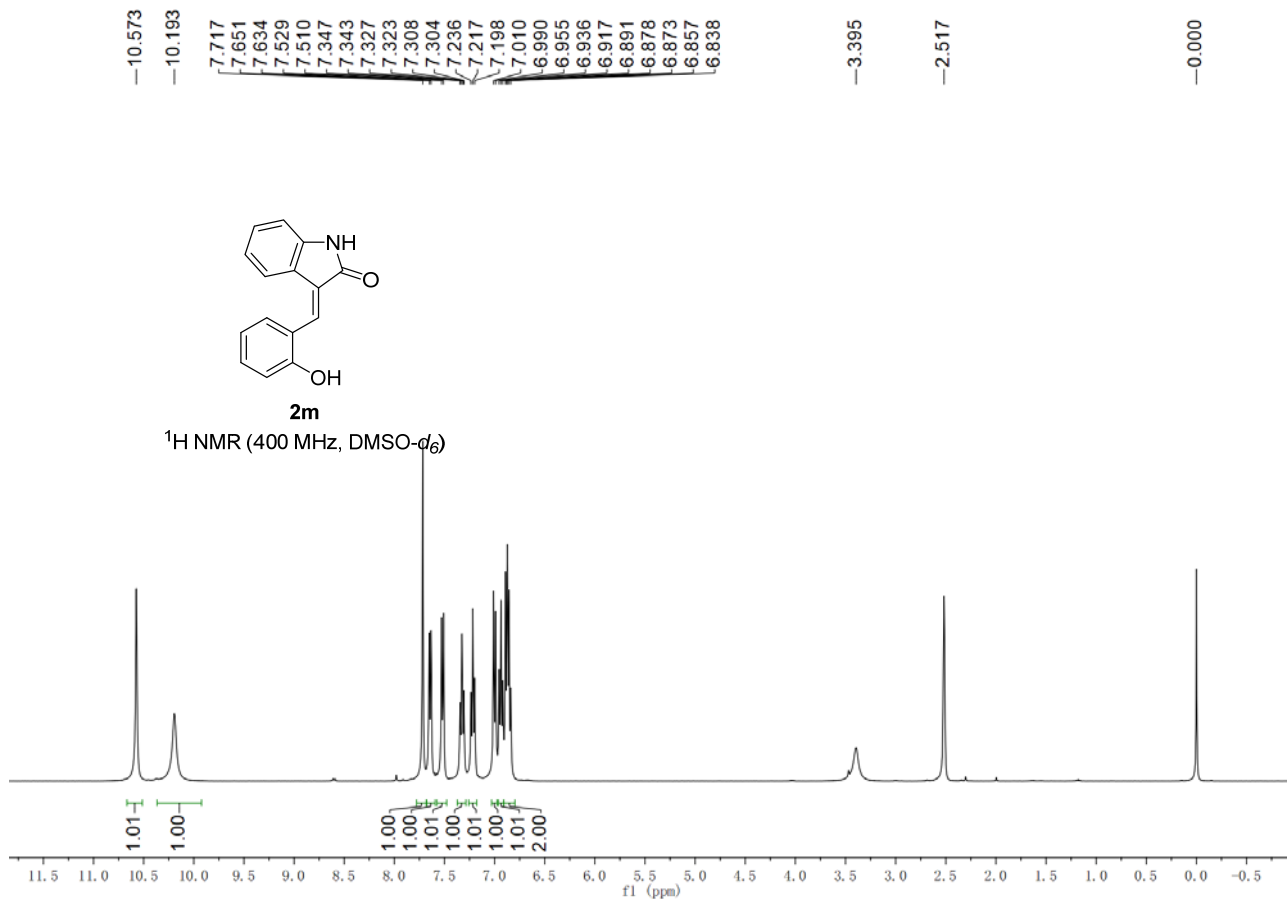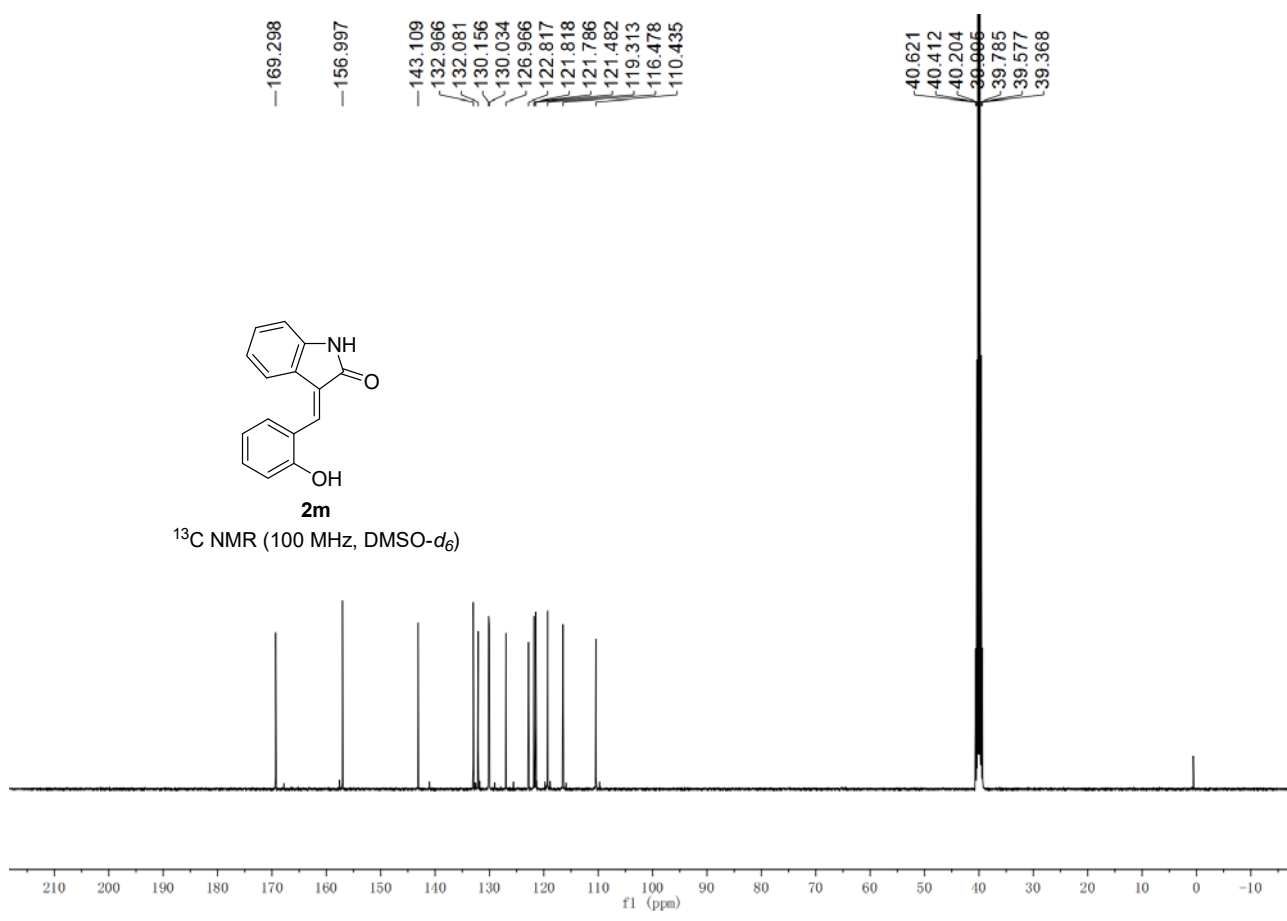

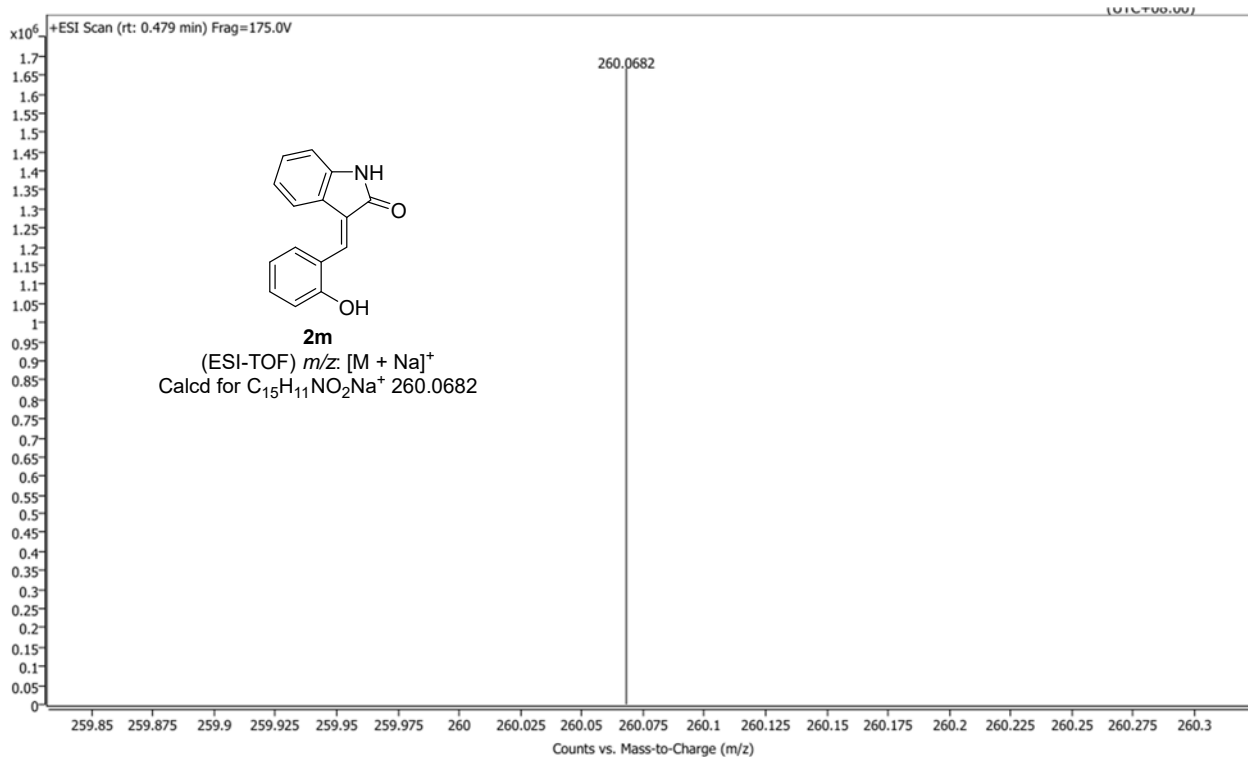

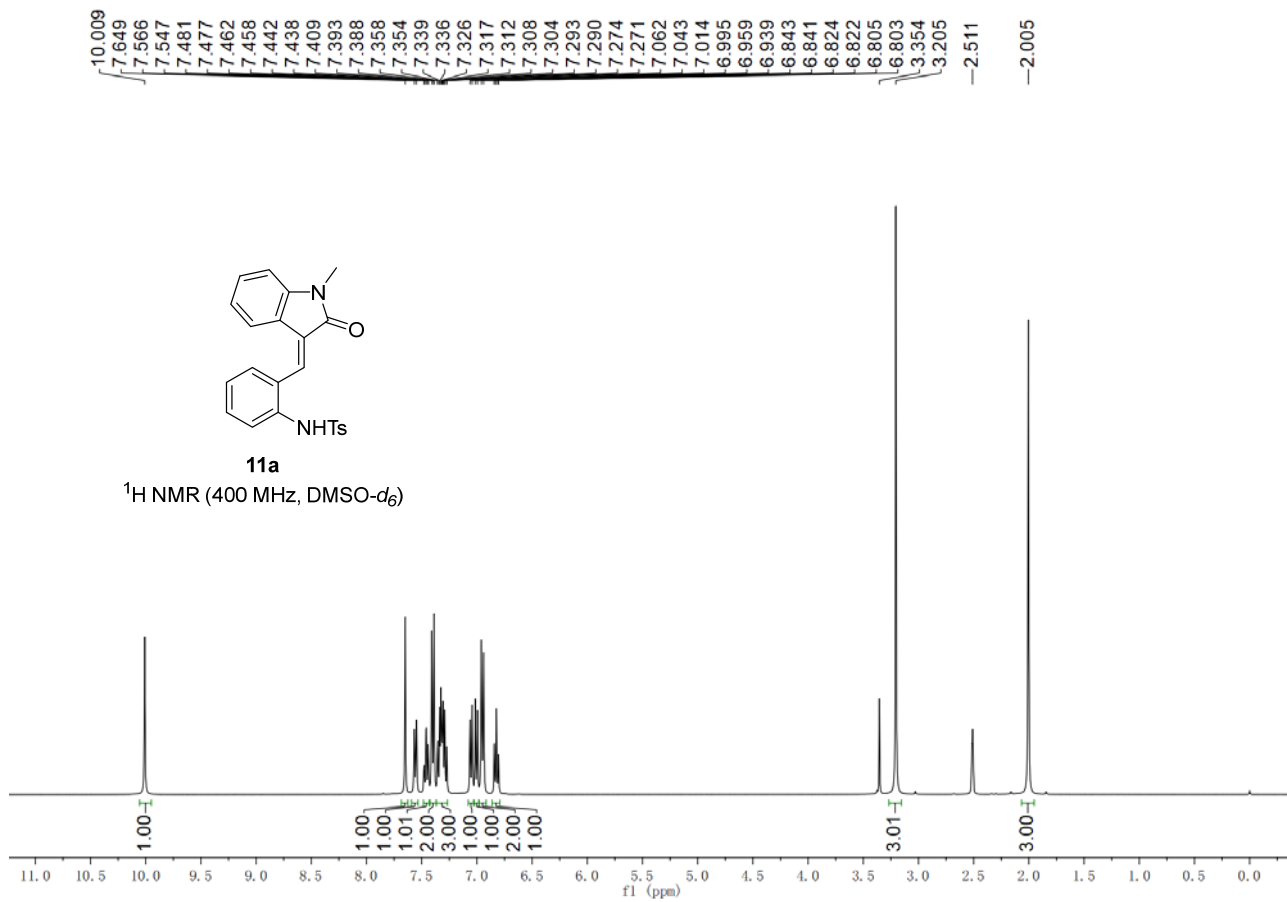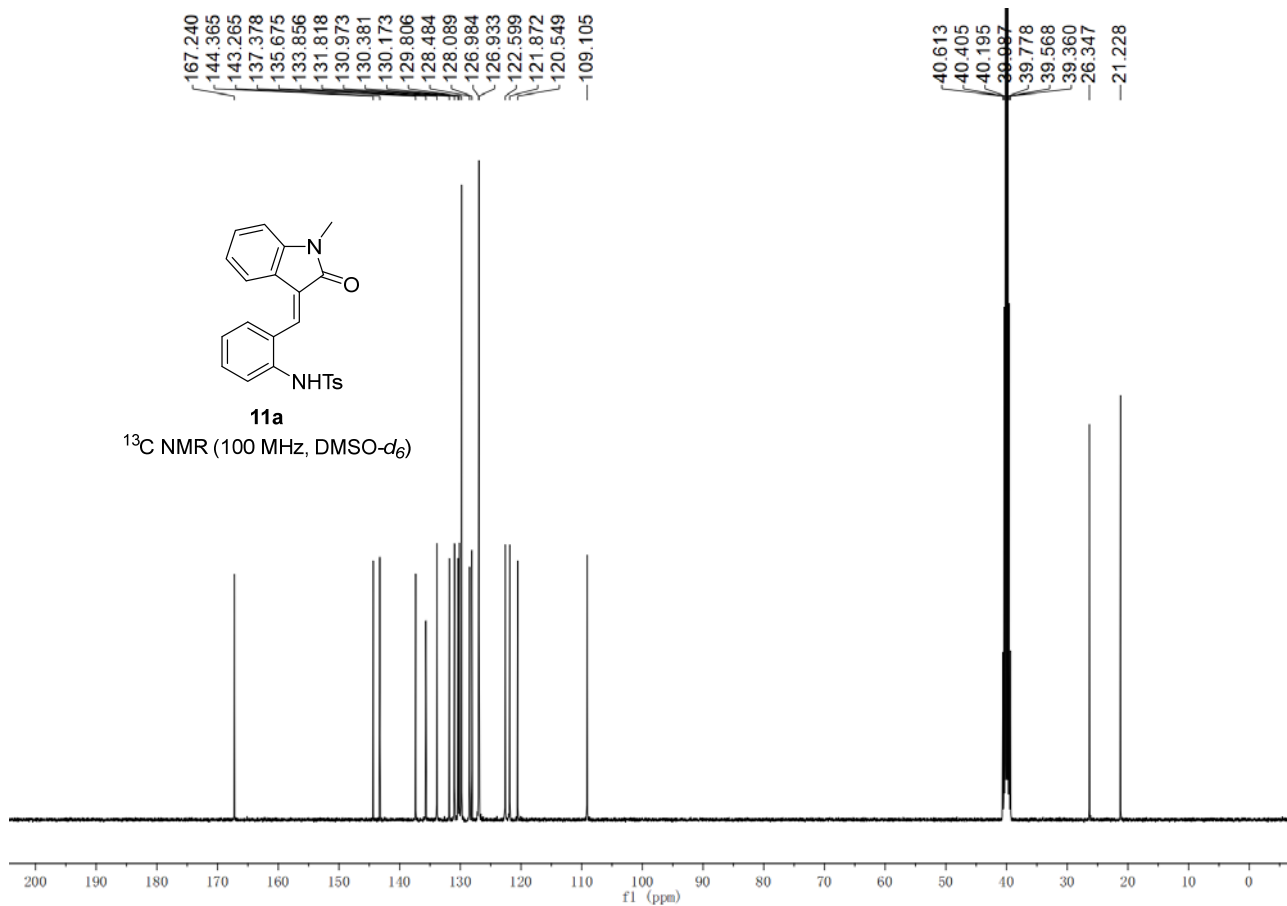

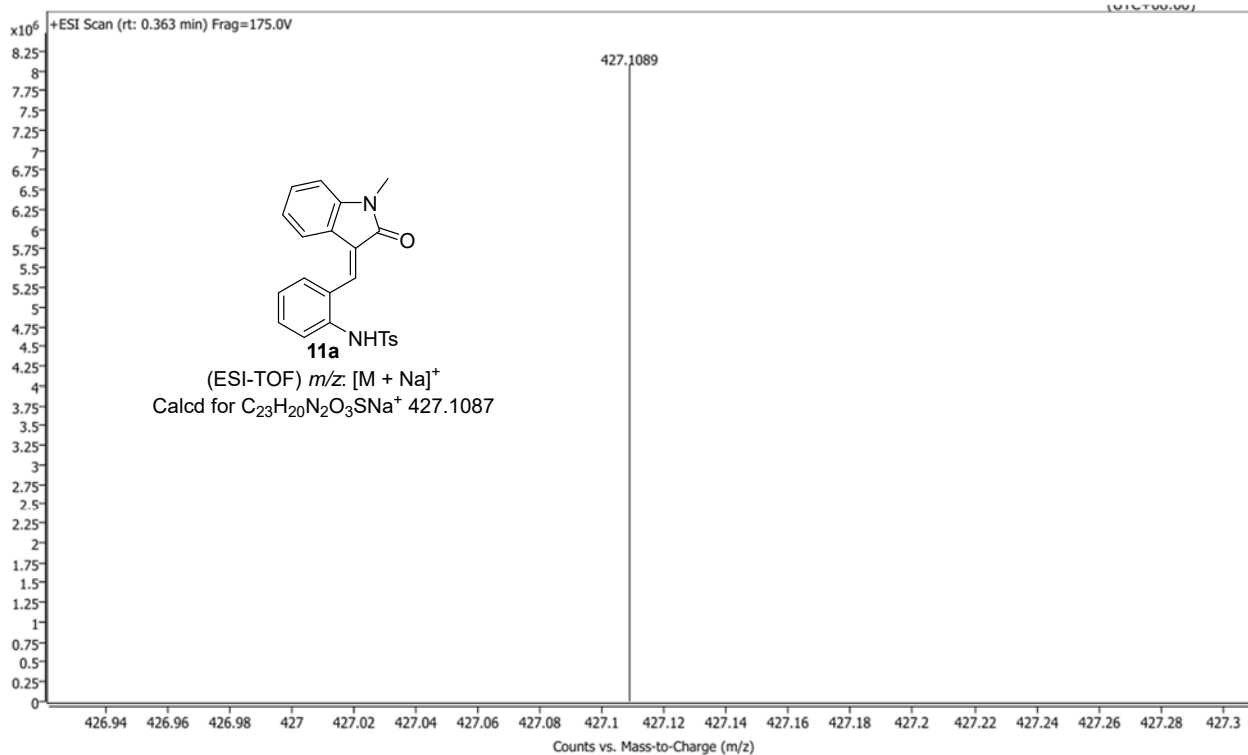

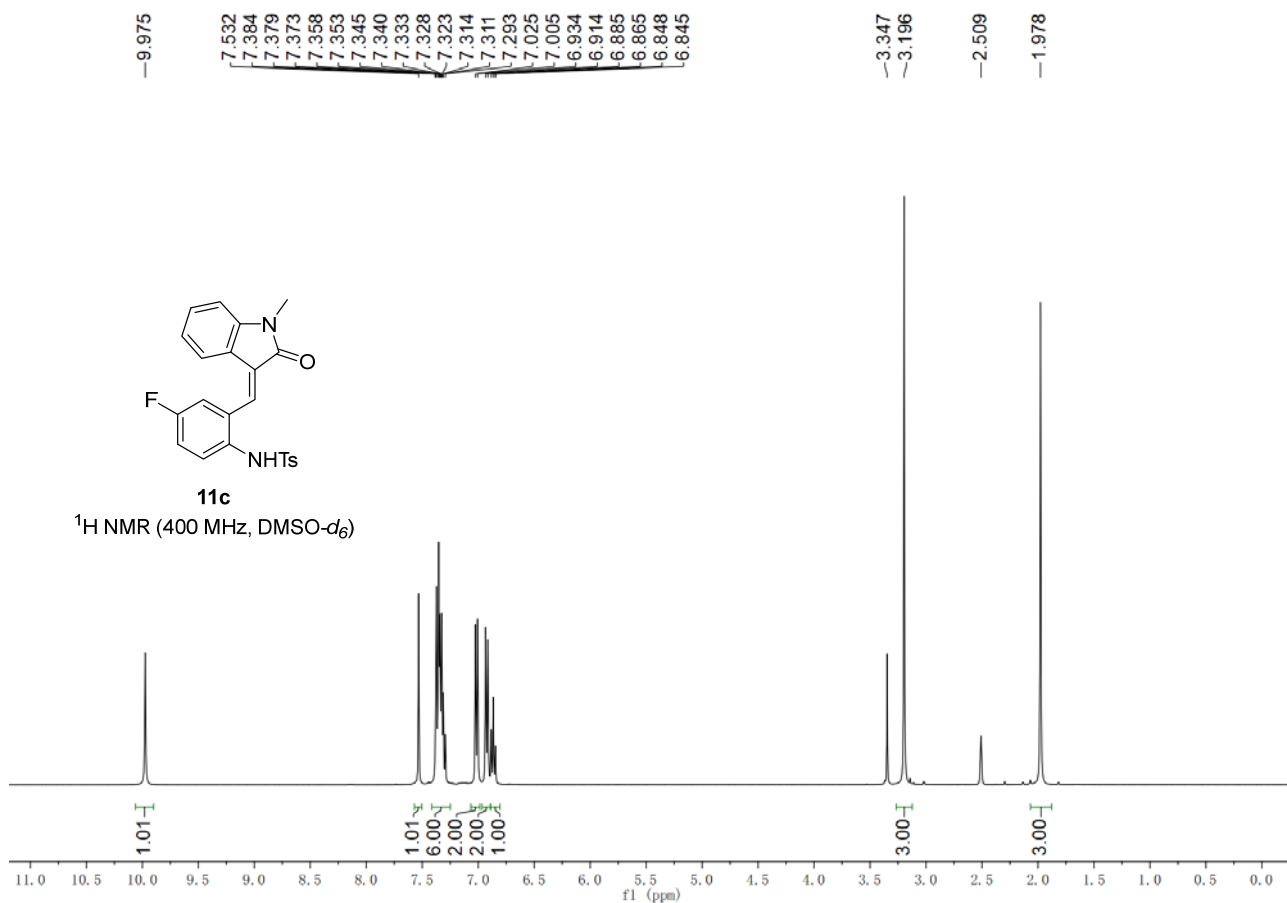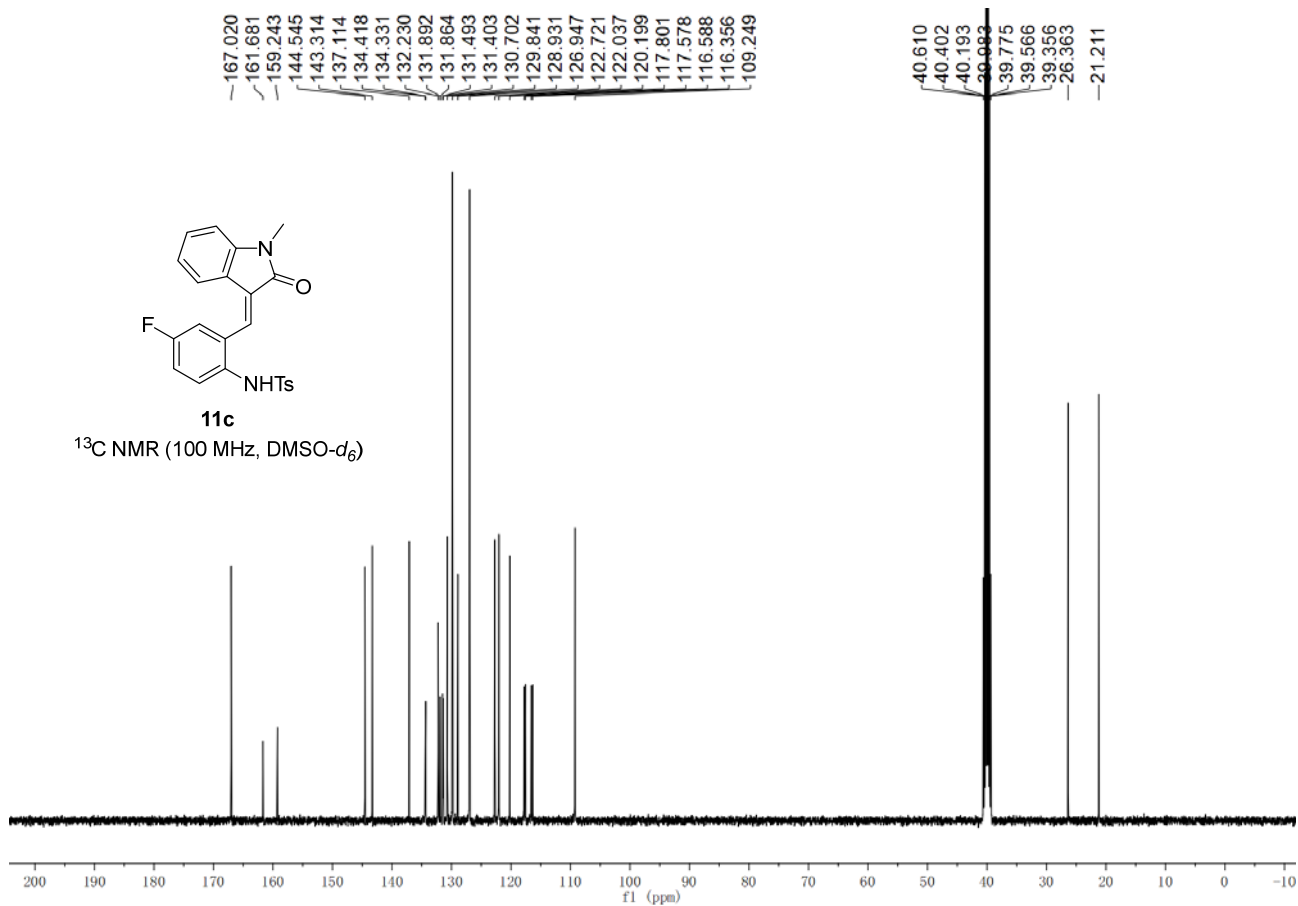



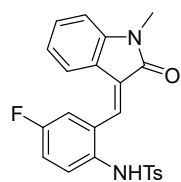

**11c**

$^{19}\text{F}$  NMR (375 MHz, DMSO- $d_6$ )

-114.639

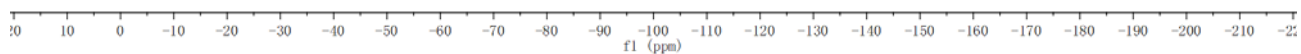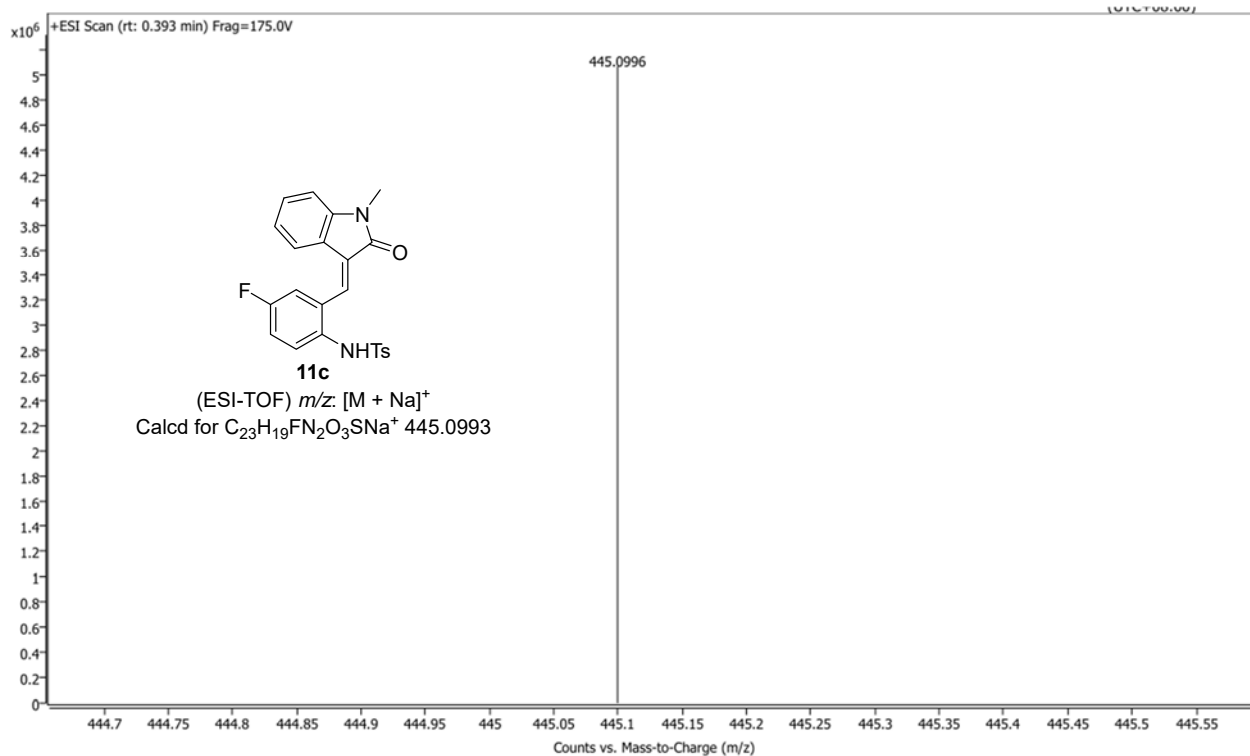

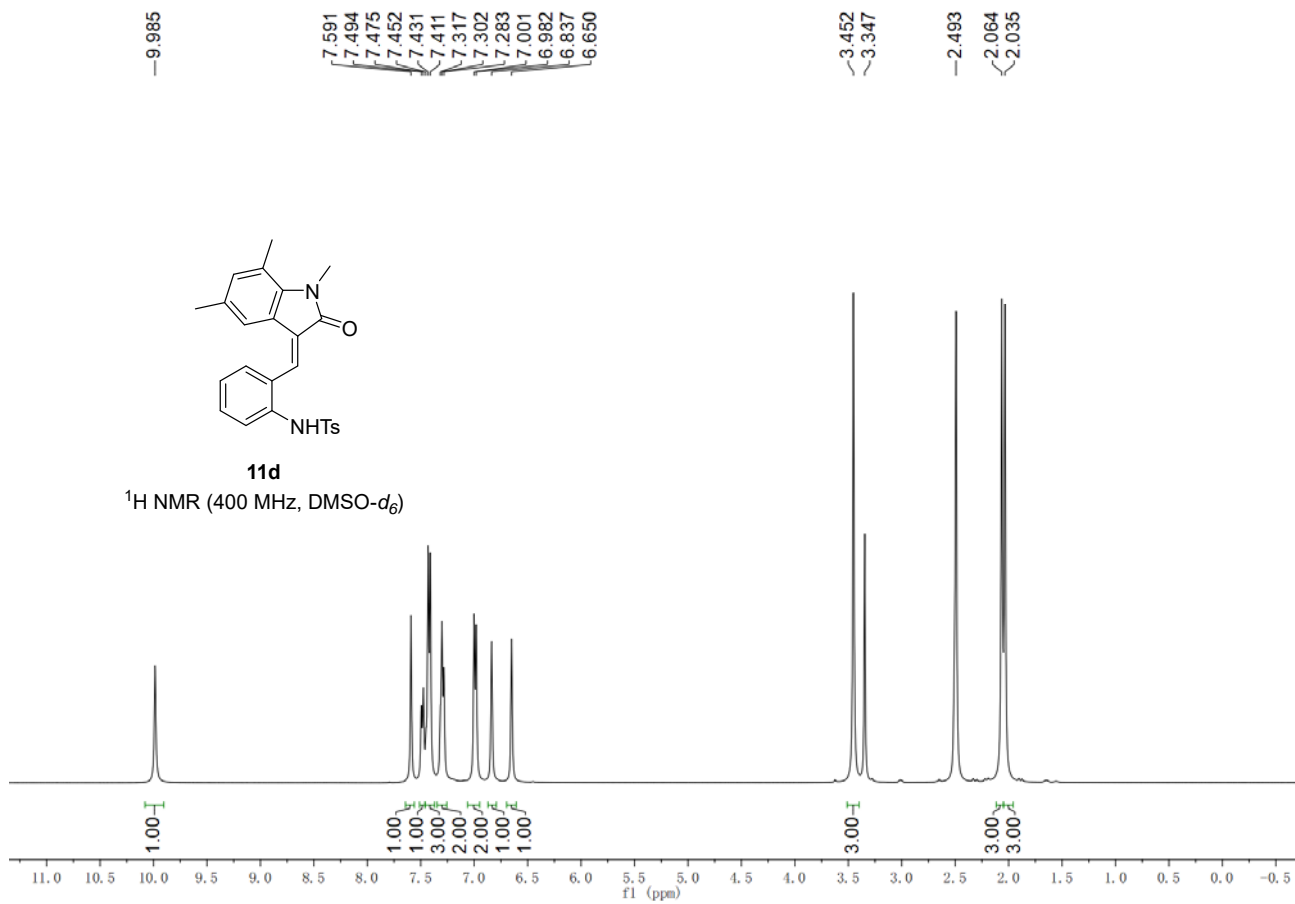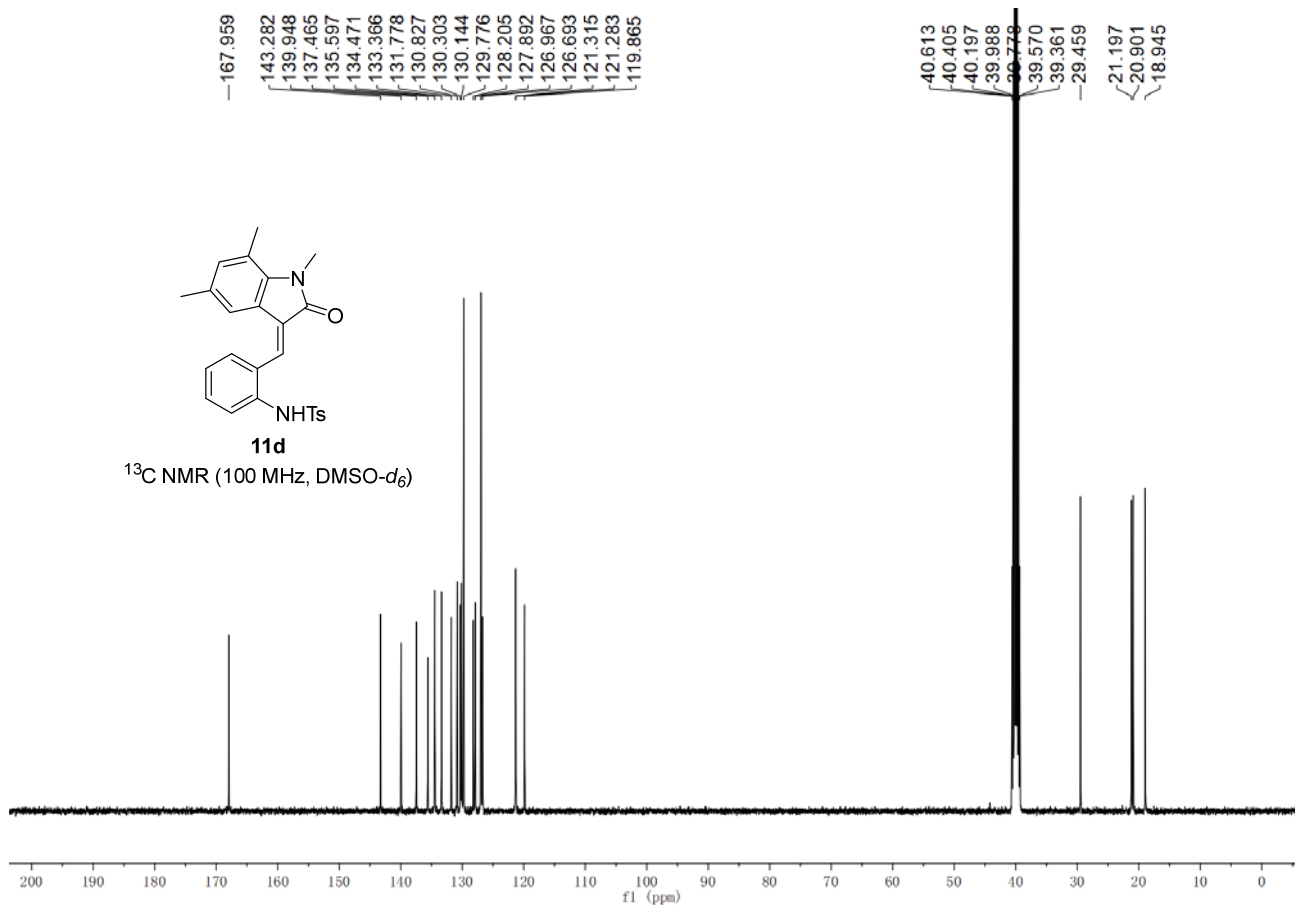

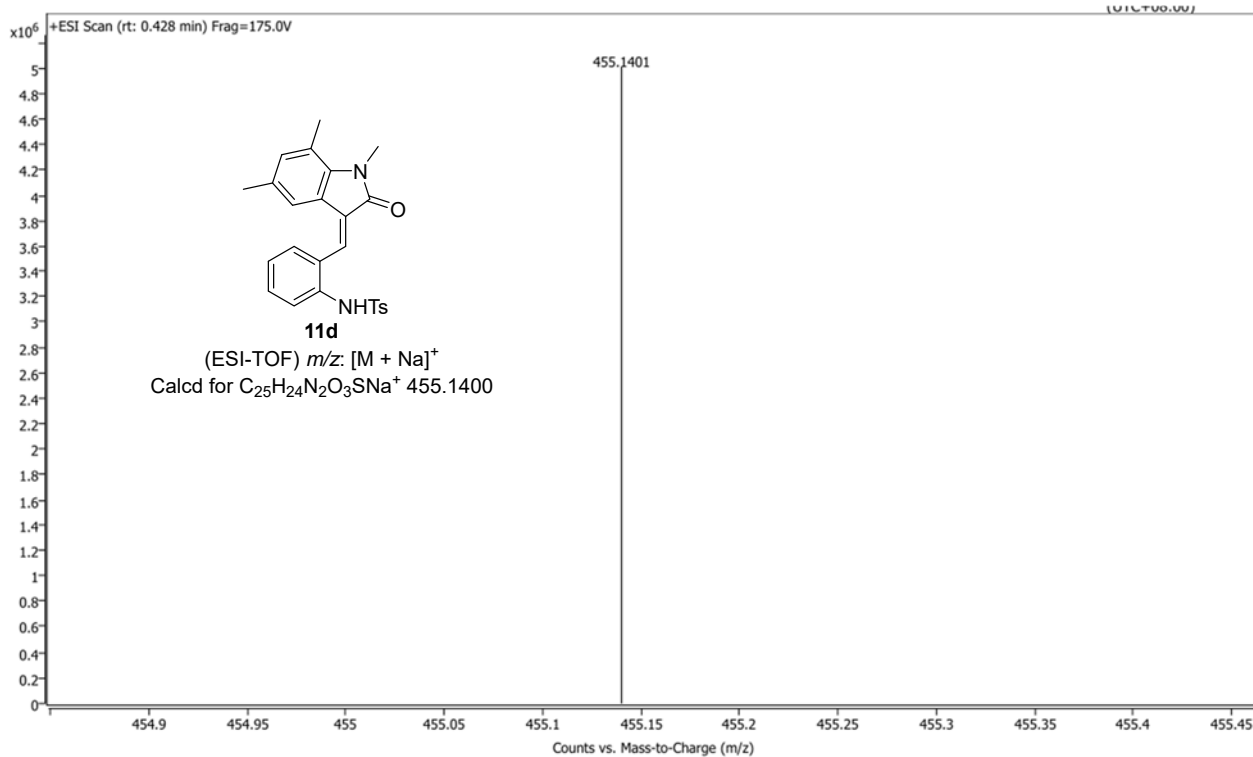

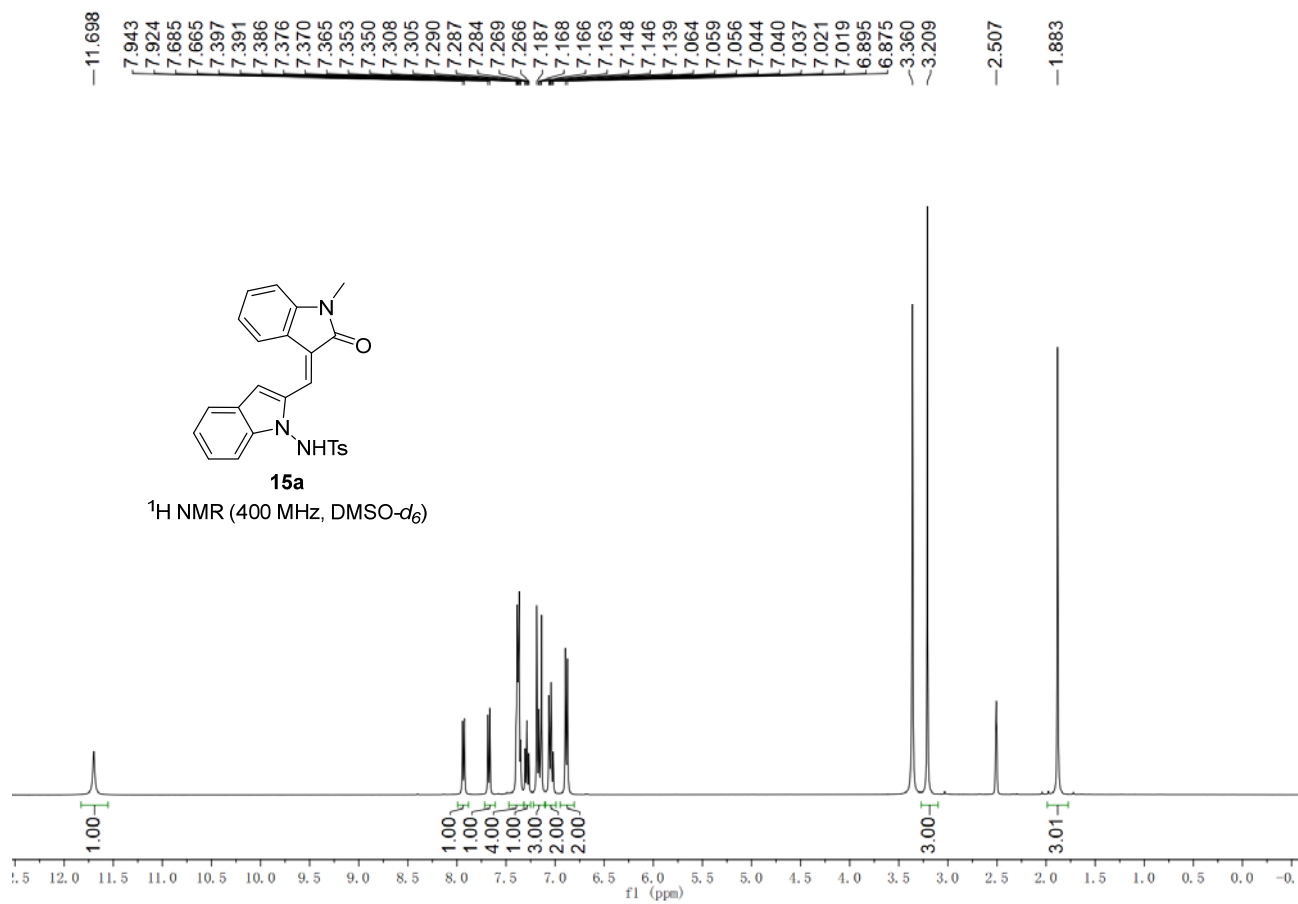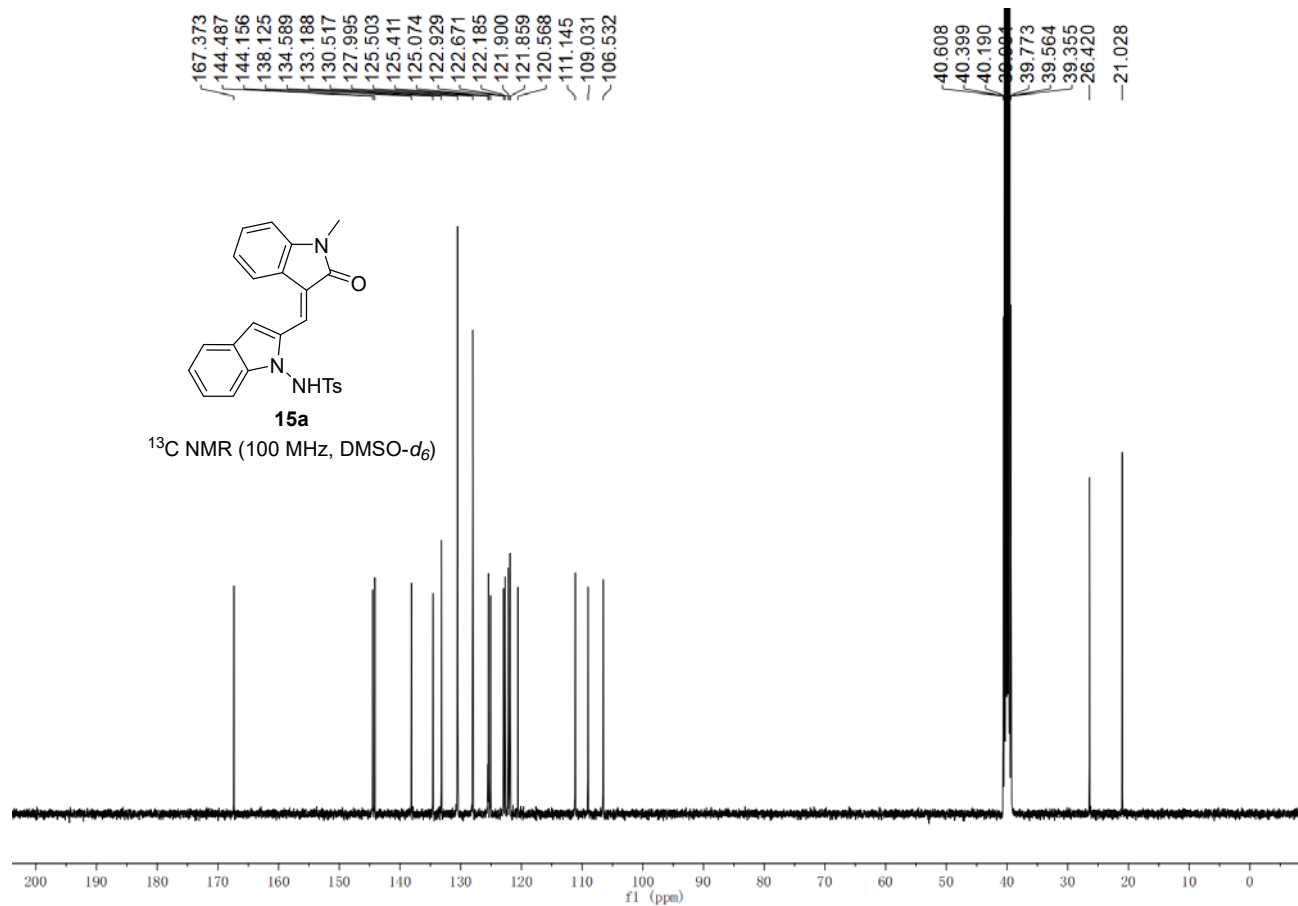

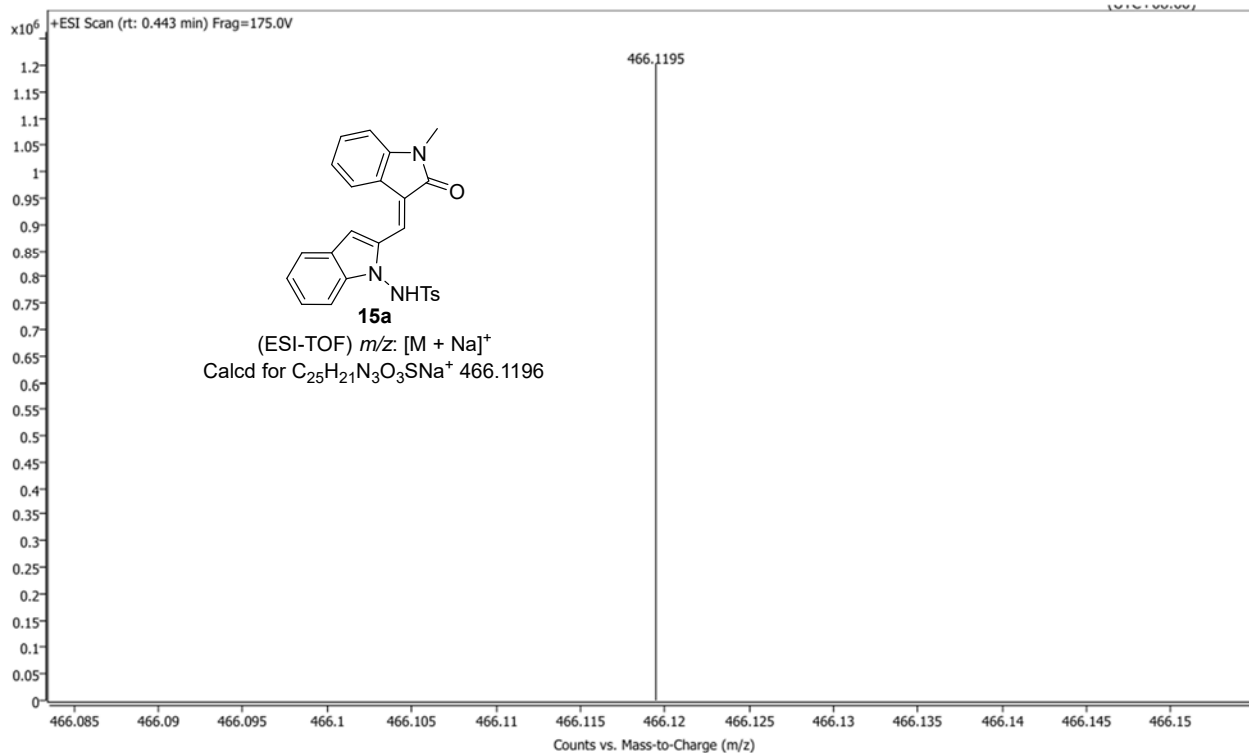

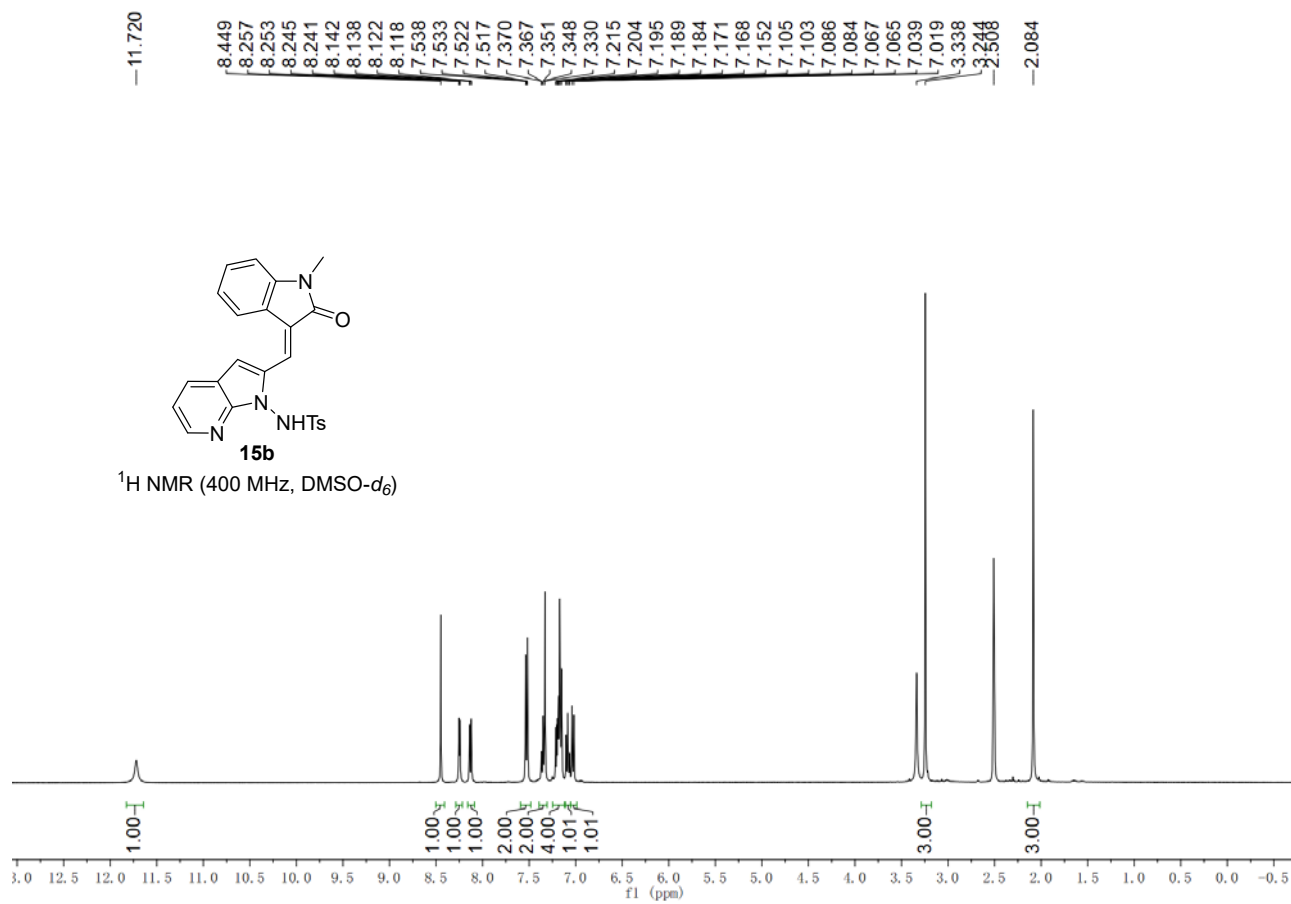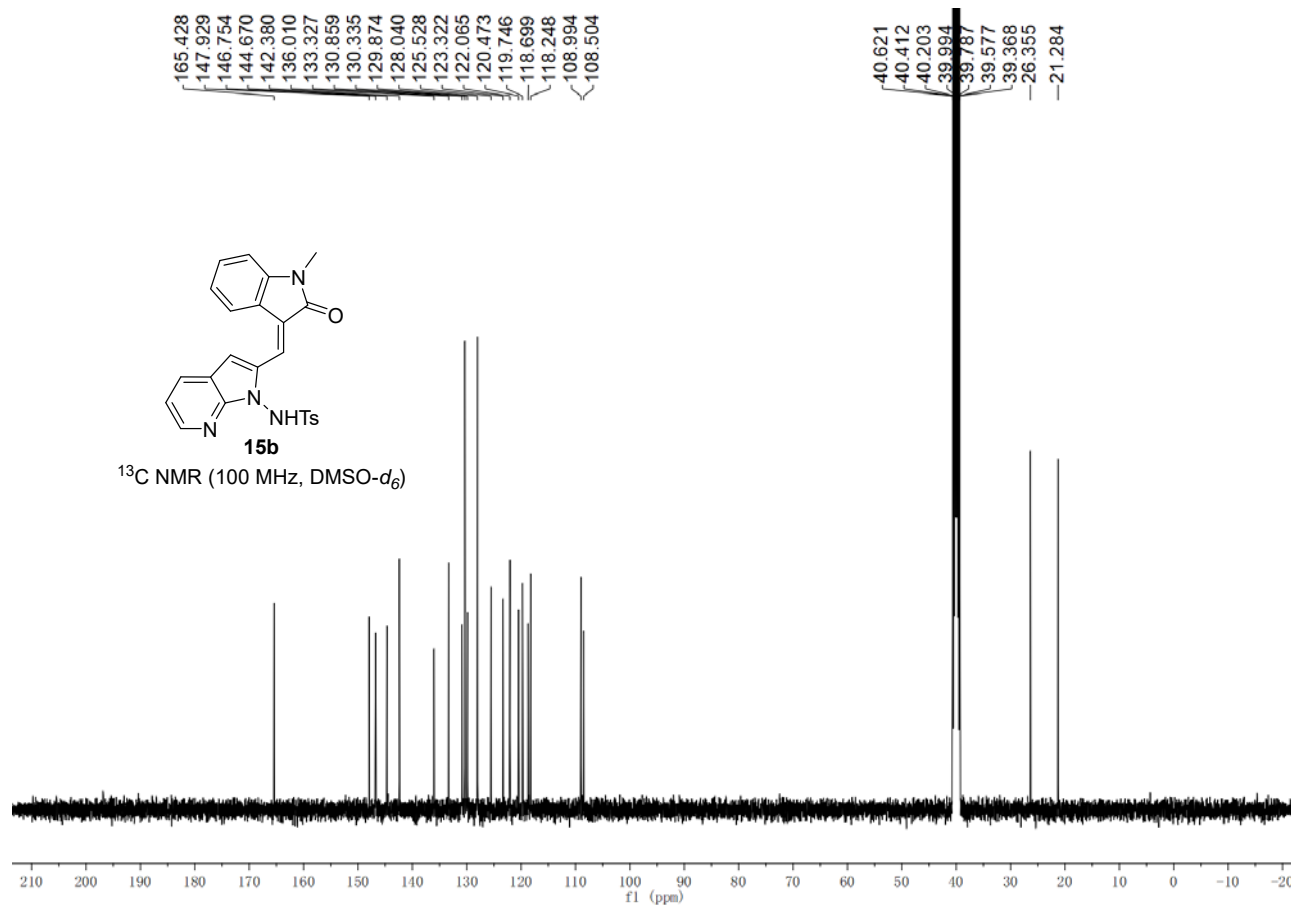

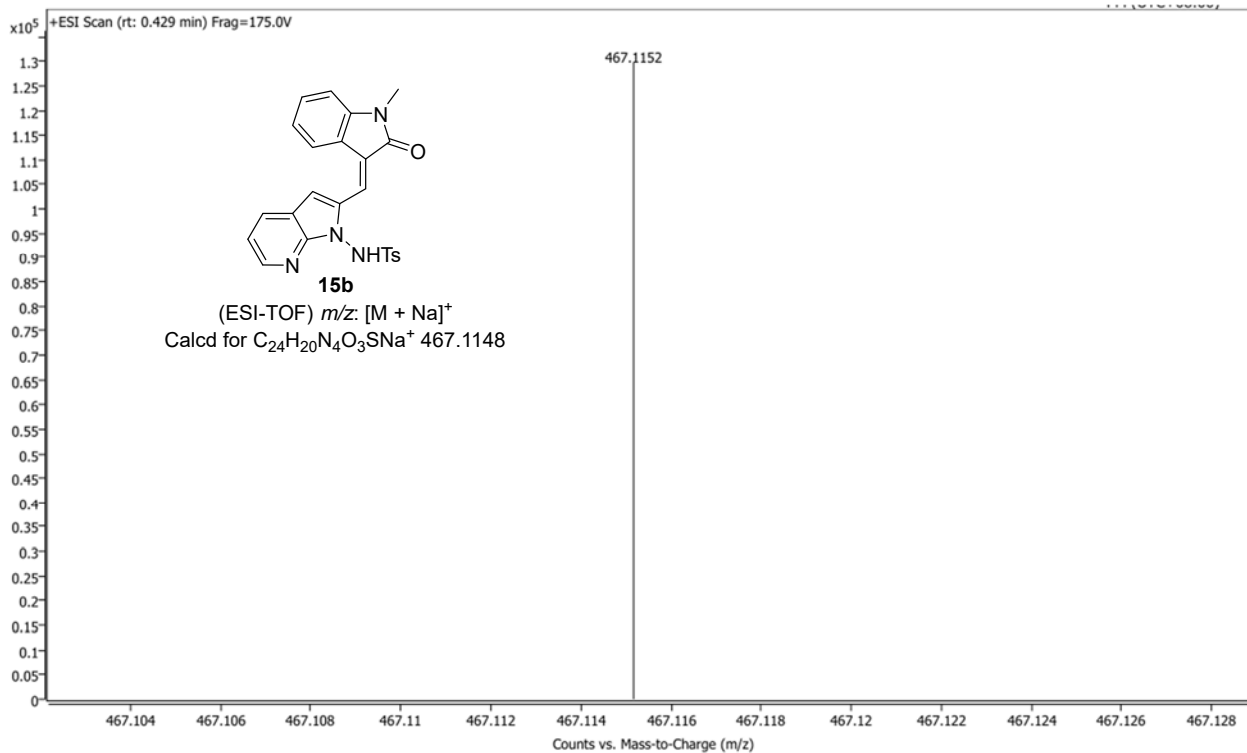

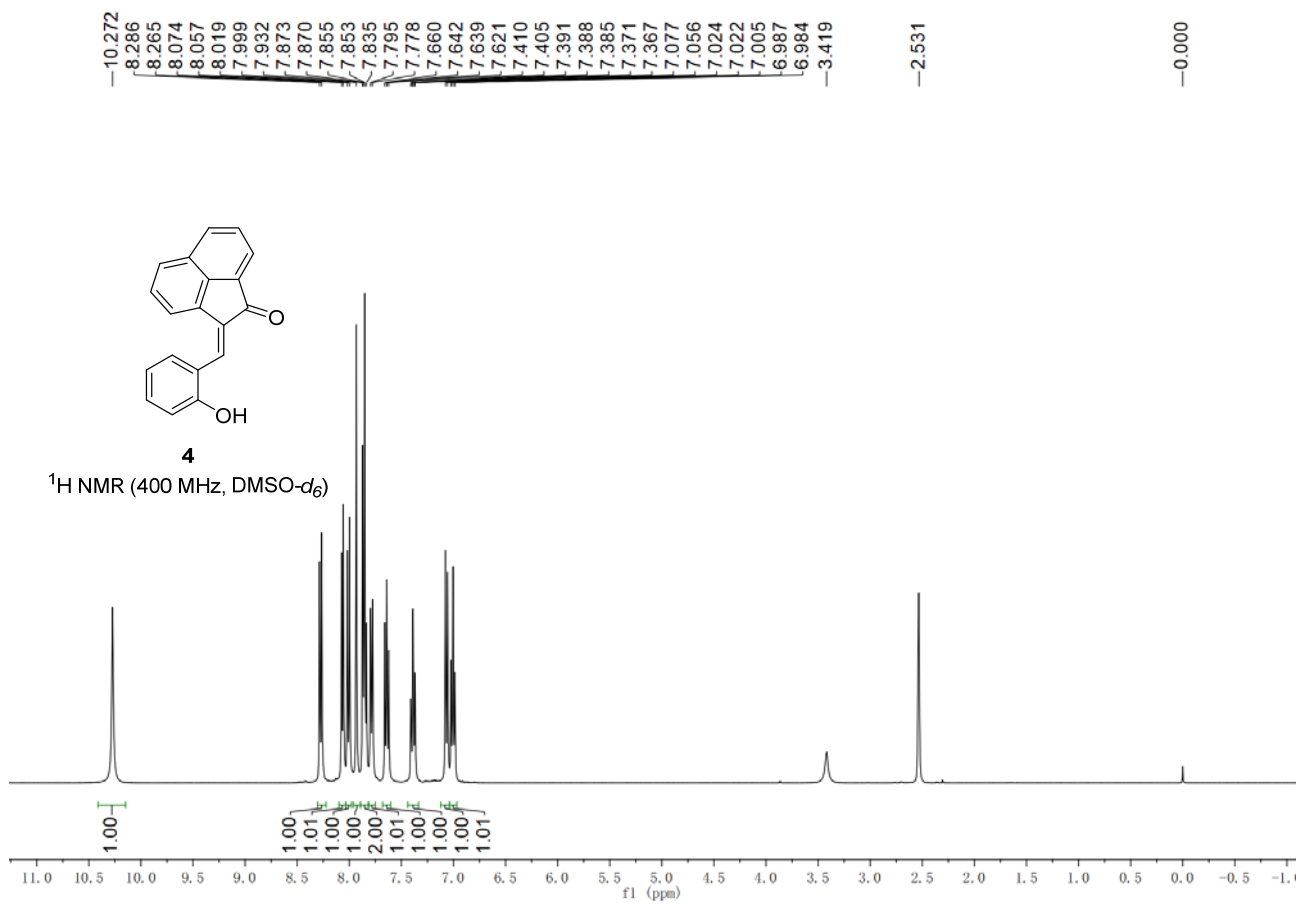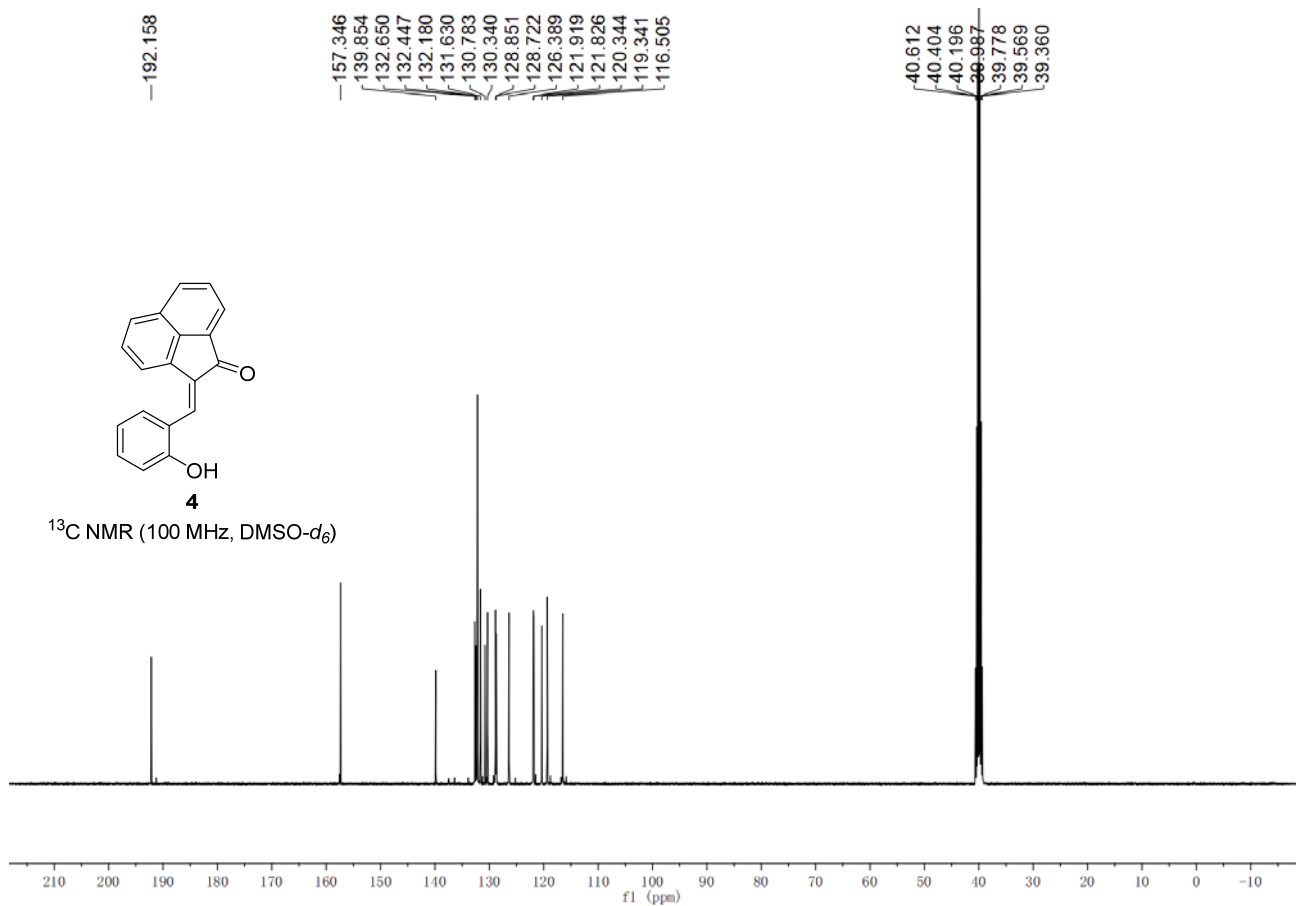



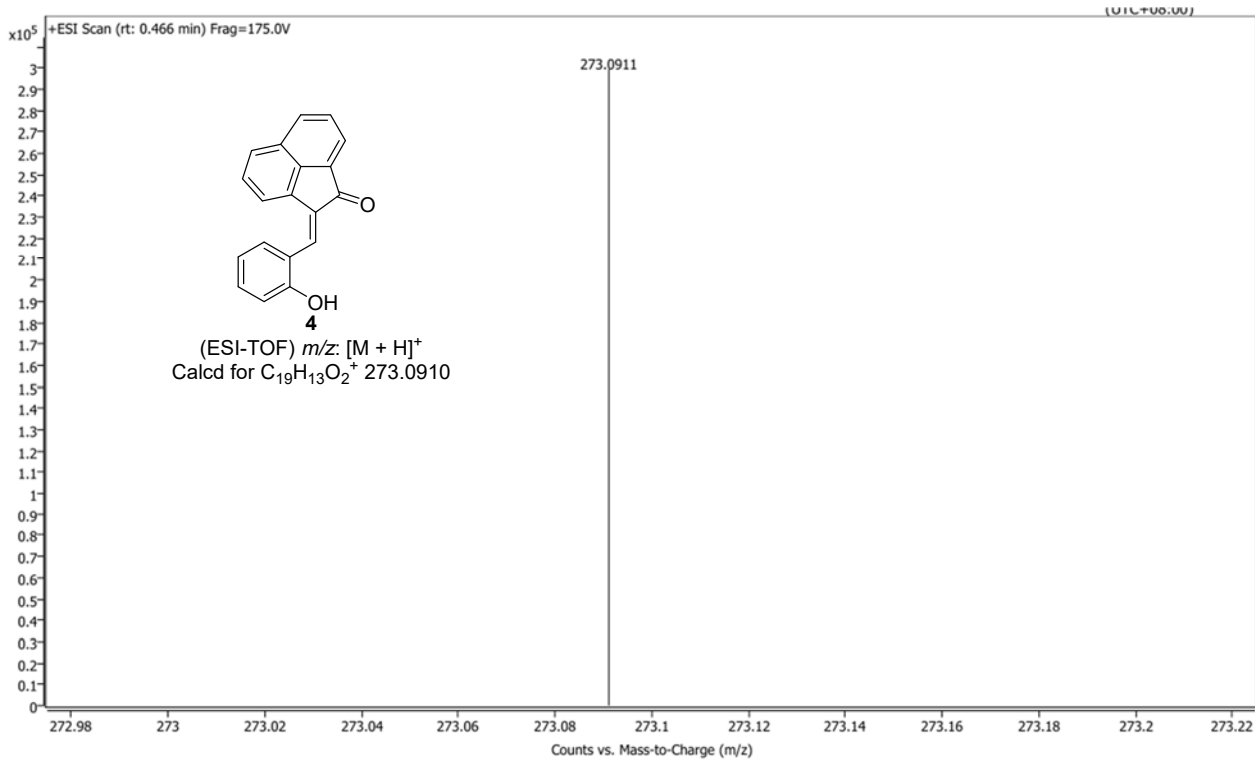

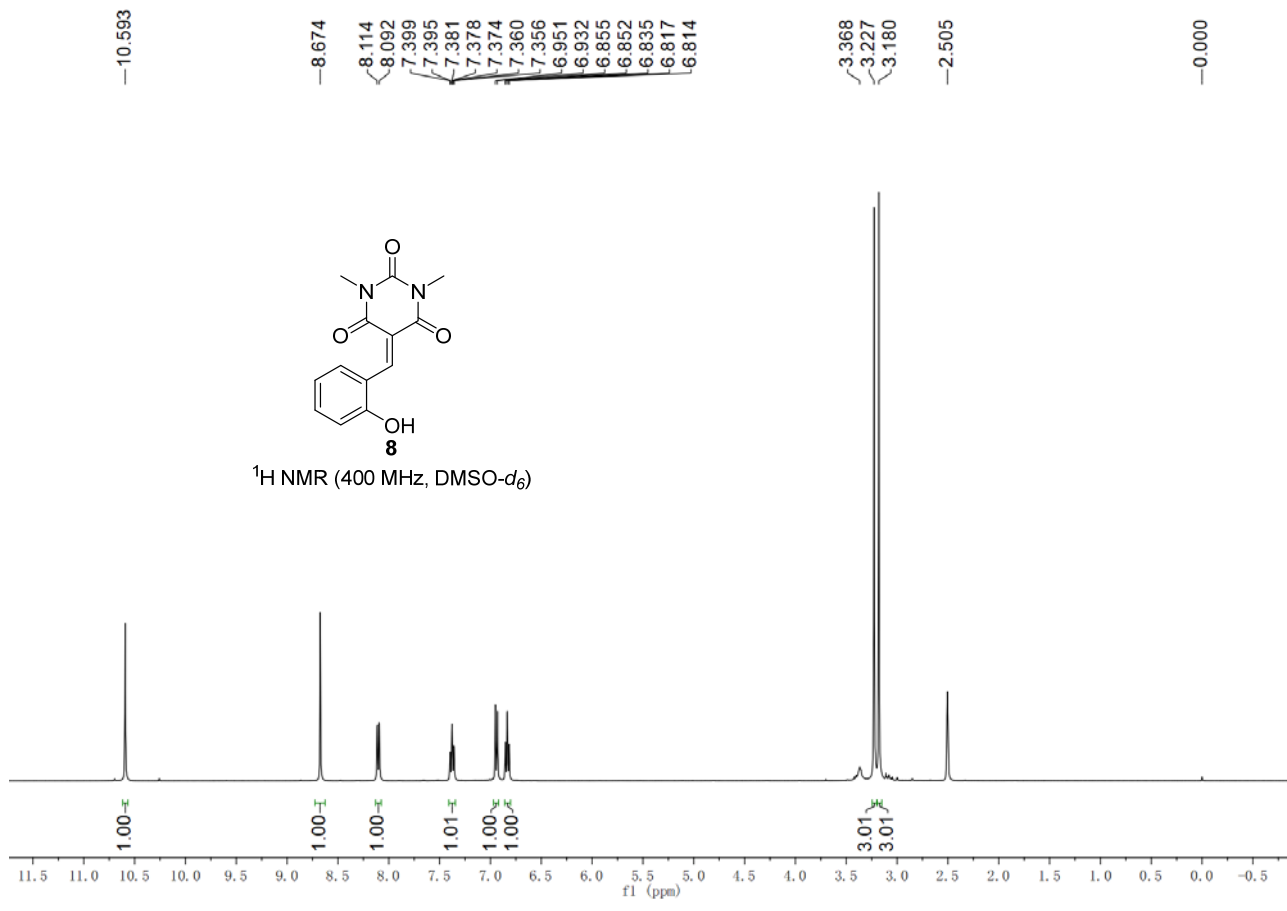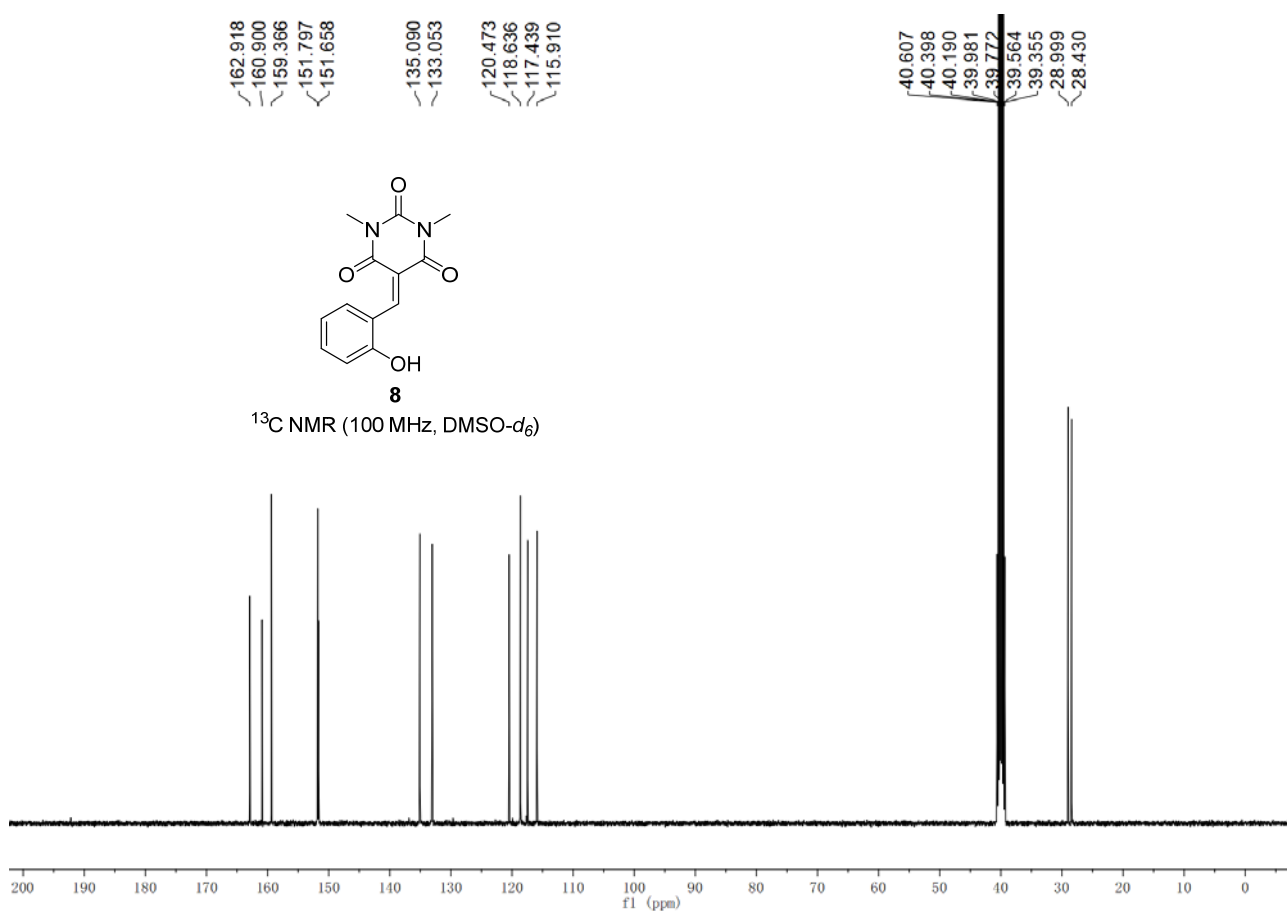

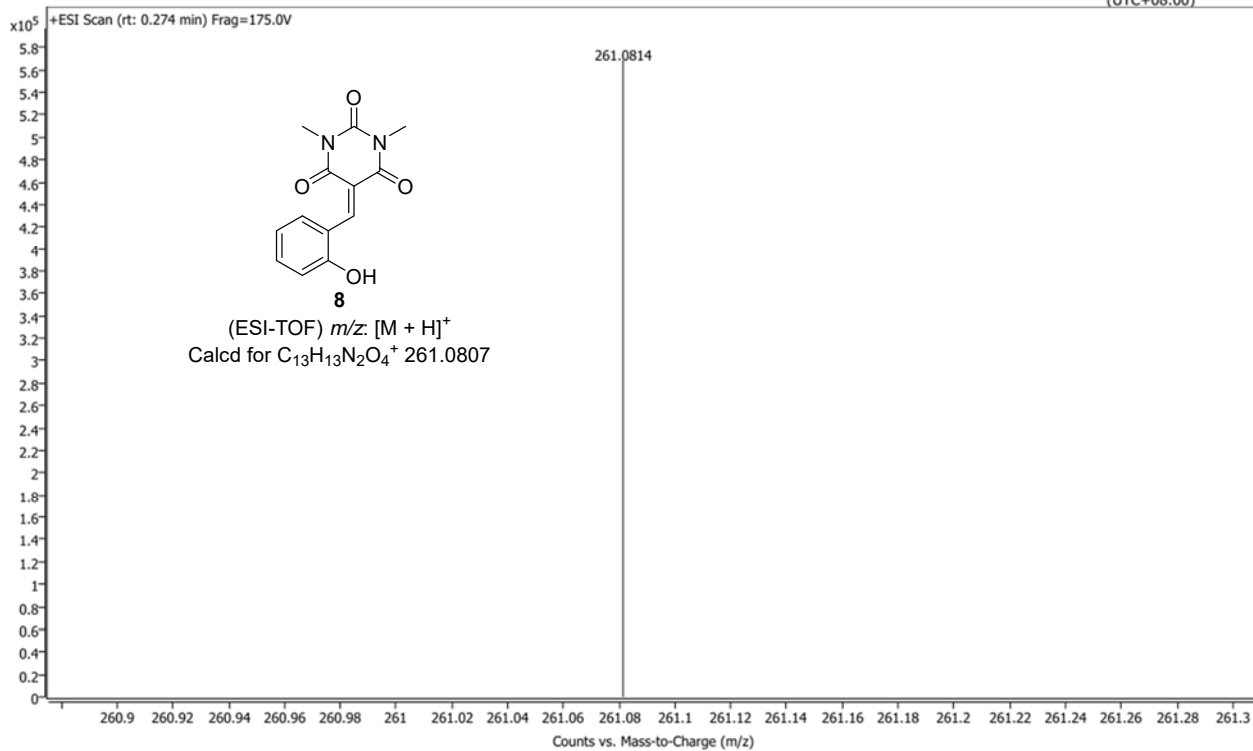

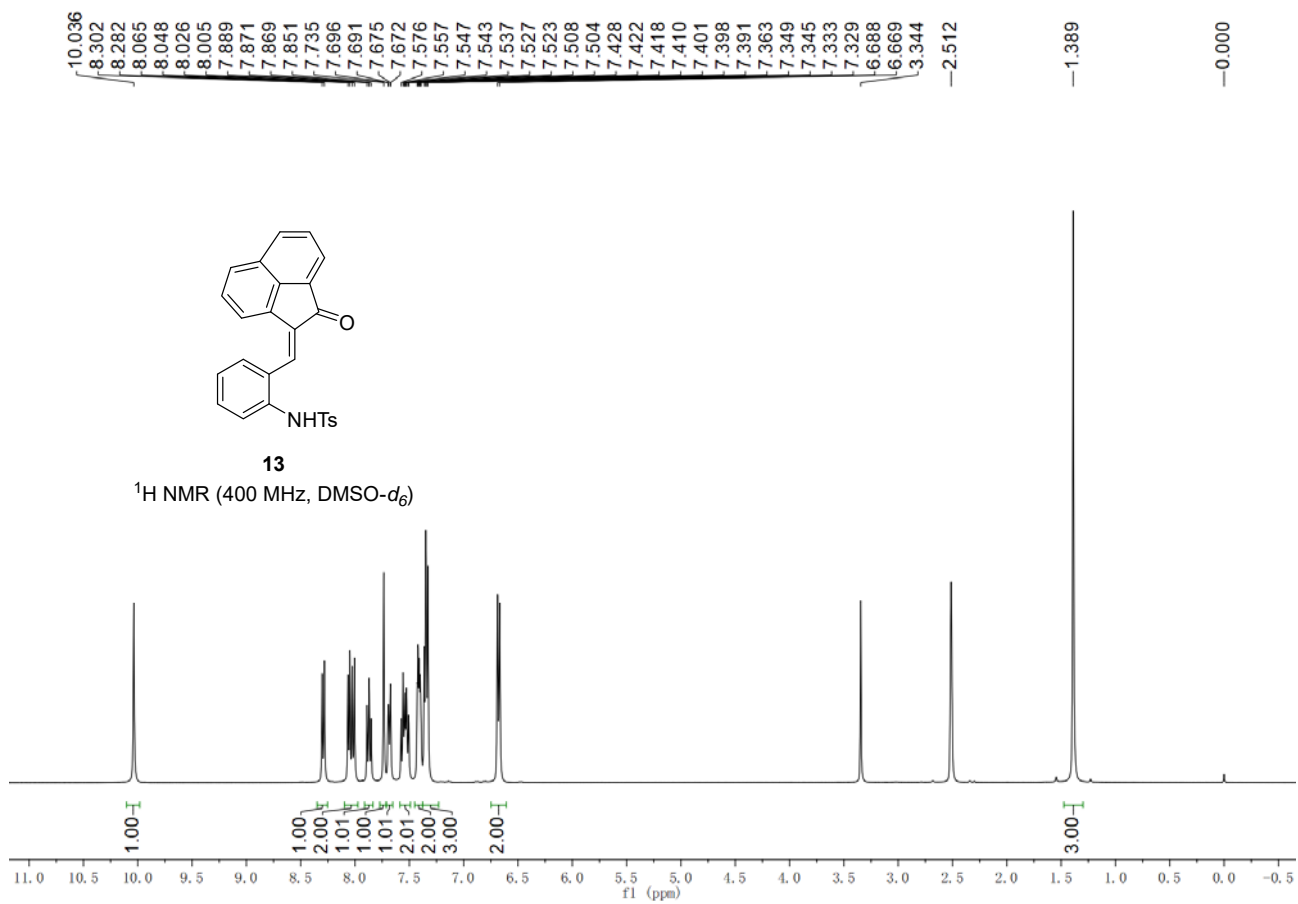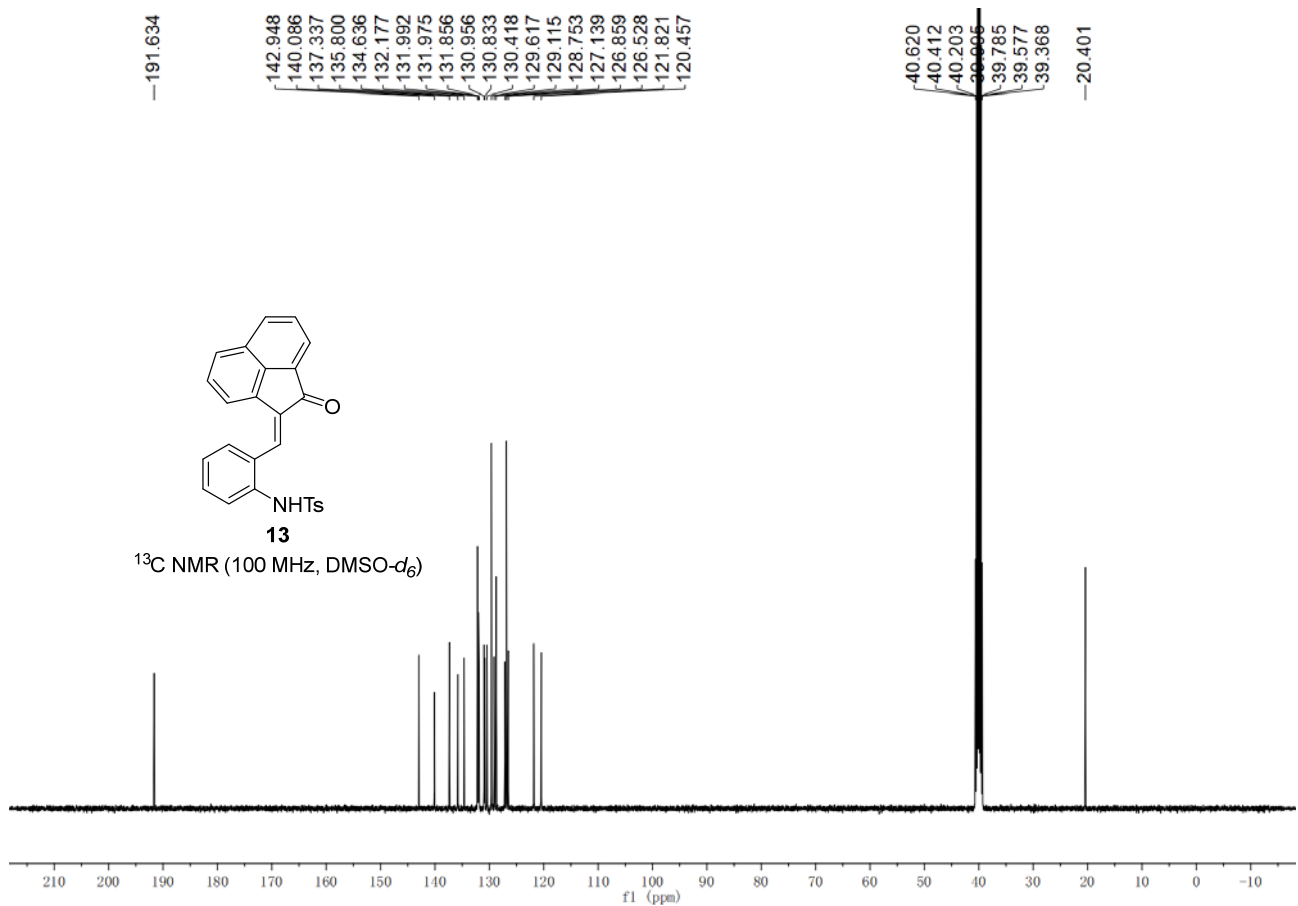

Spectrum from 20240821.wif2 (sample 17) - 10, +TOF MS (200 - 600) from 0.063 to 0.111 min, noise filtered (noise multiplier = 1.5), Gaussian smoothed (0.5 points), centroided

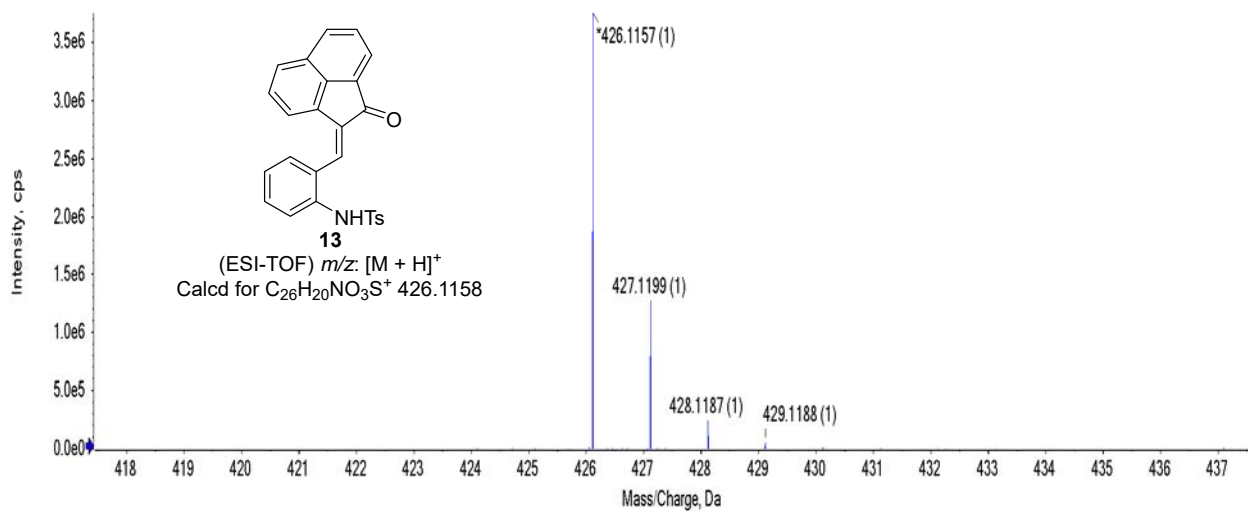

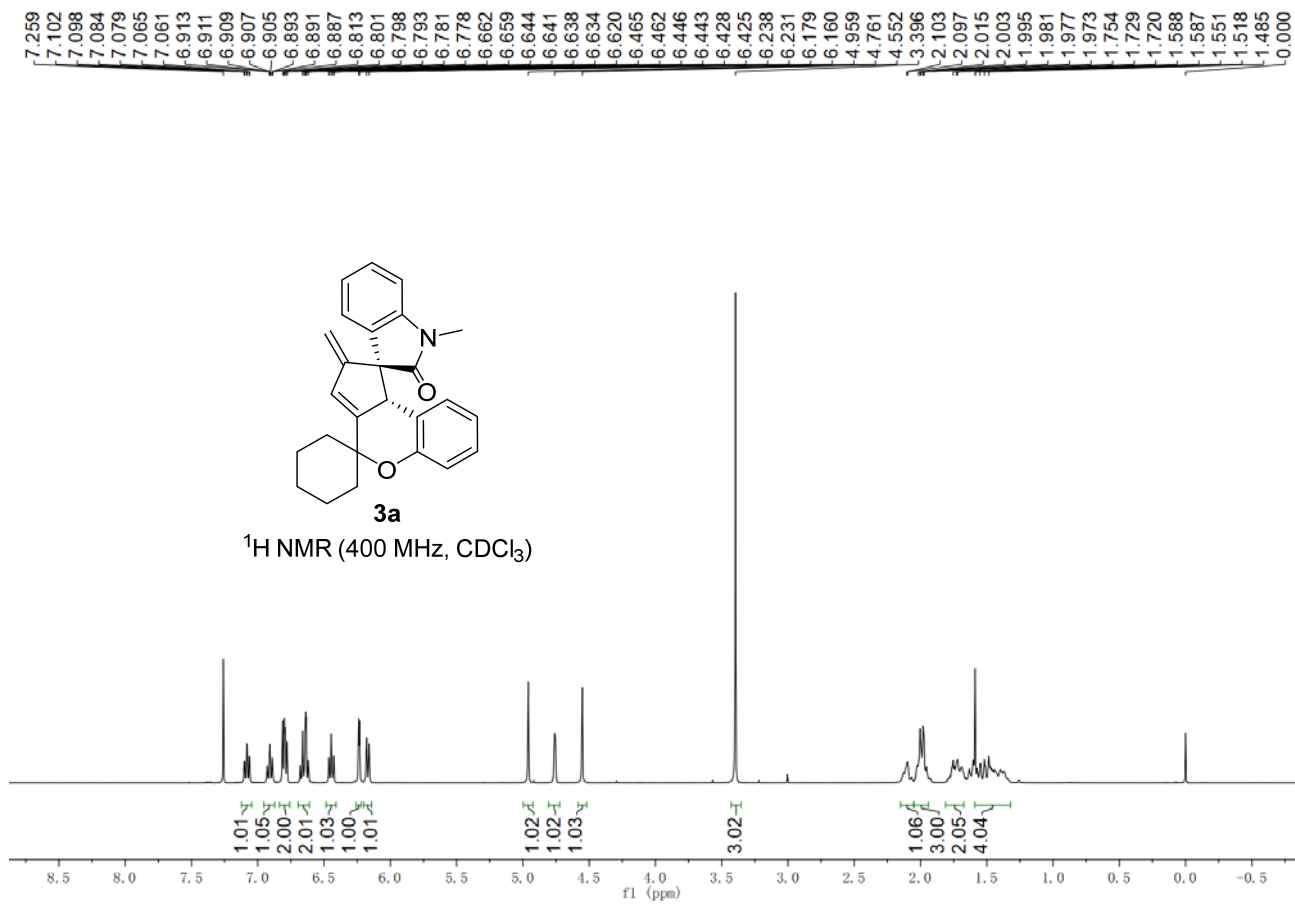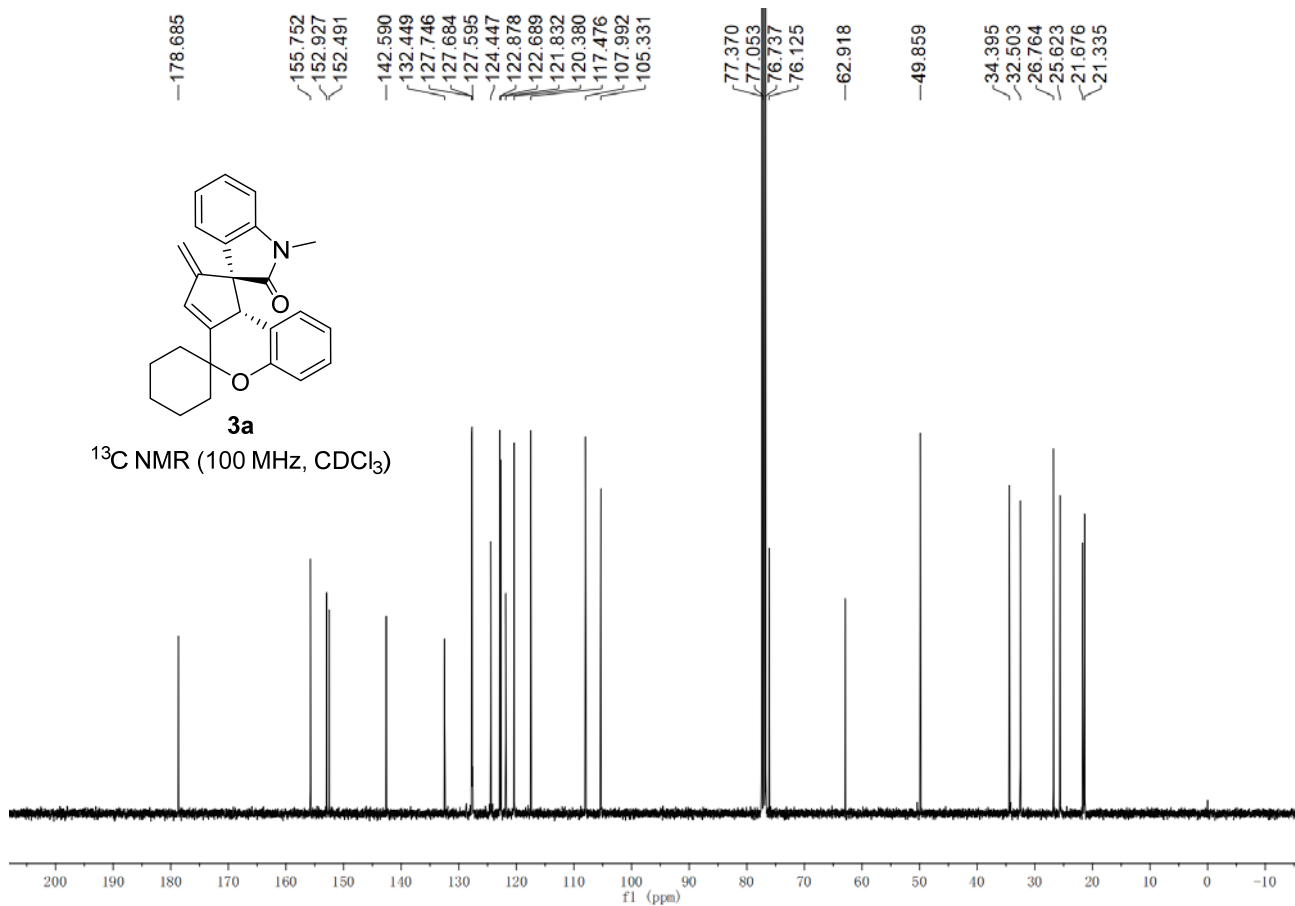

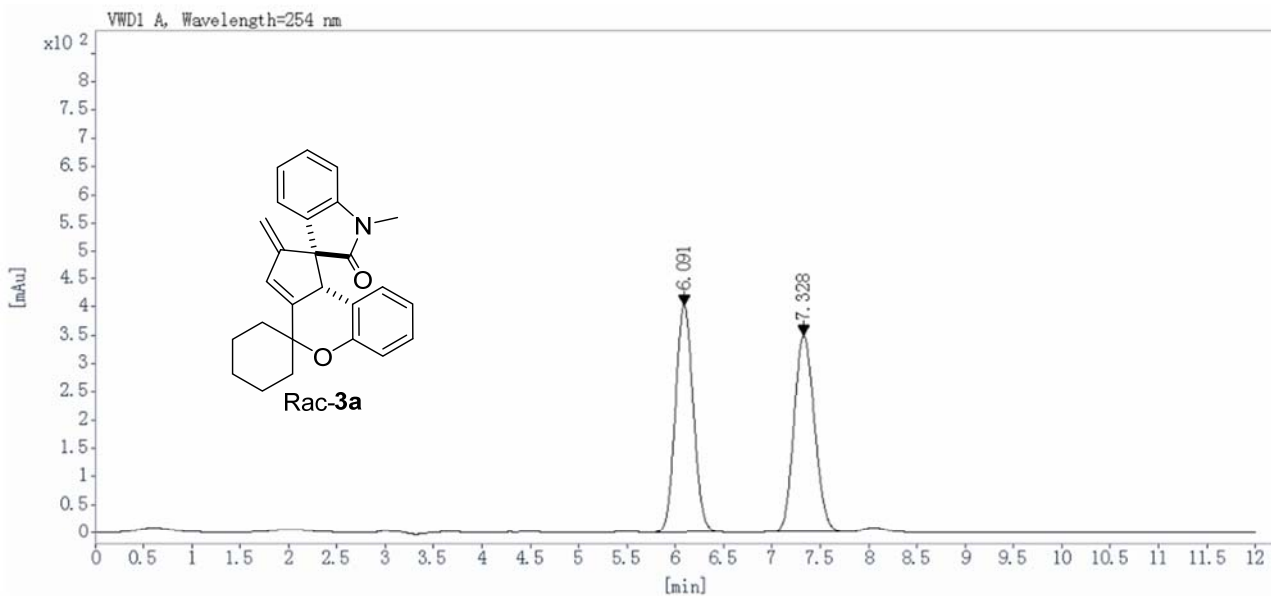

| Ret Time [min] | Peak Type | Width [min] | Height [mAU] | Area [mAU*s] | Area [%] |
|----------------|-----------|-------------|--------------|--------------|----------|
| 6.091          | BBA       | 0.20        | 402.5508     | 5172.2280    | 50.0206  |
| 7.328          | BBA       | 0.23        | 347.8087     | 5167.9780    | 49.9794  |
| Totals:        |           |             |              | 10340.2061   | 100.0000 |

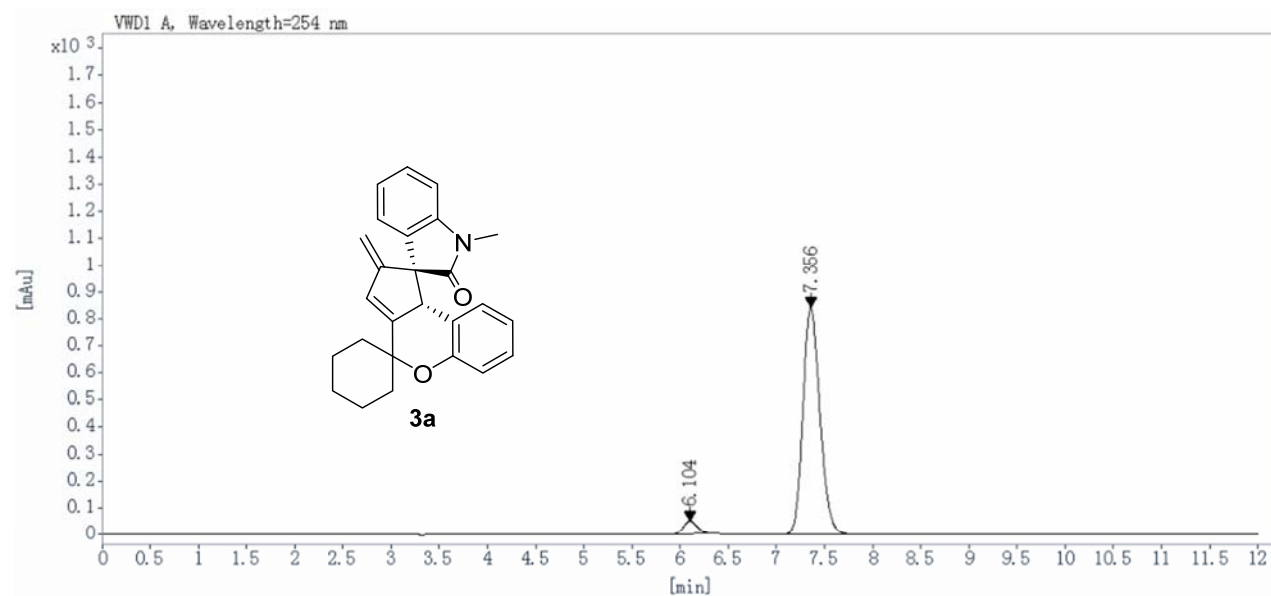

| Ret Time [min] | Peak Type | Width [min] | Height [mAU] | Area [mAU*s] | Area [%] |
|----------------|-----------|-------------|--------------|--------------|----------|
| 6.104          | BBA       | 0.15        | 49.1703      | 488.3062     | 4.5169   |
| 7.356          | BBA       | 0.19        | 841.7538     | 10322.3574   | 95.4831  |
| Totals:        |           |             |              | 10810.6636   | 100.0000 |

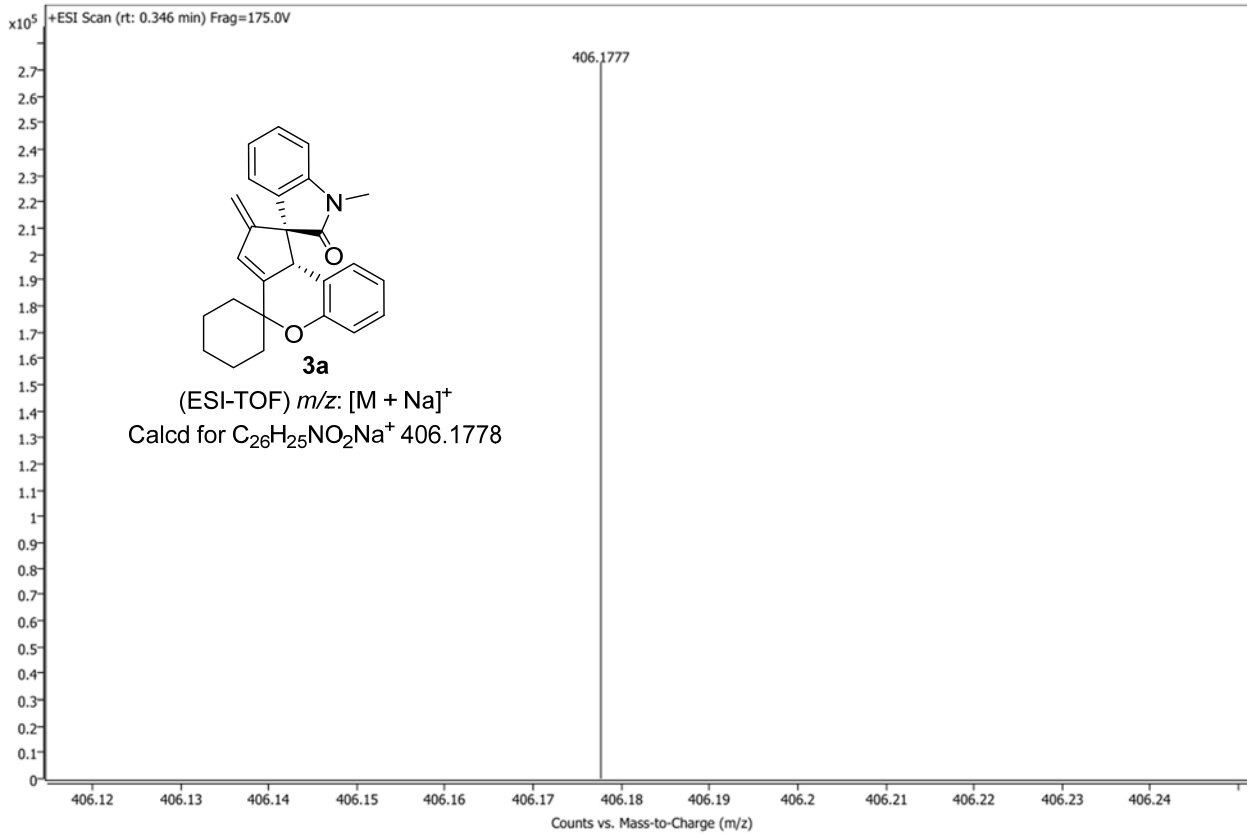



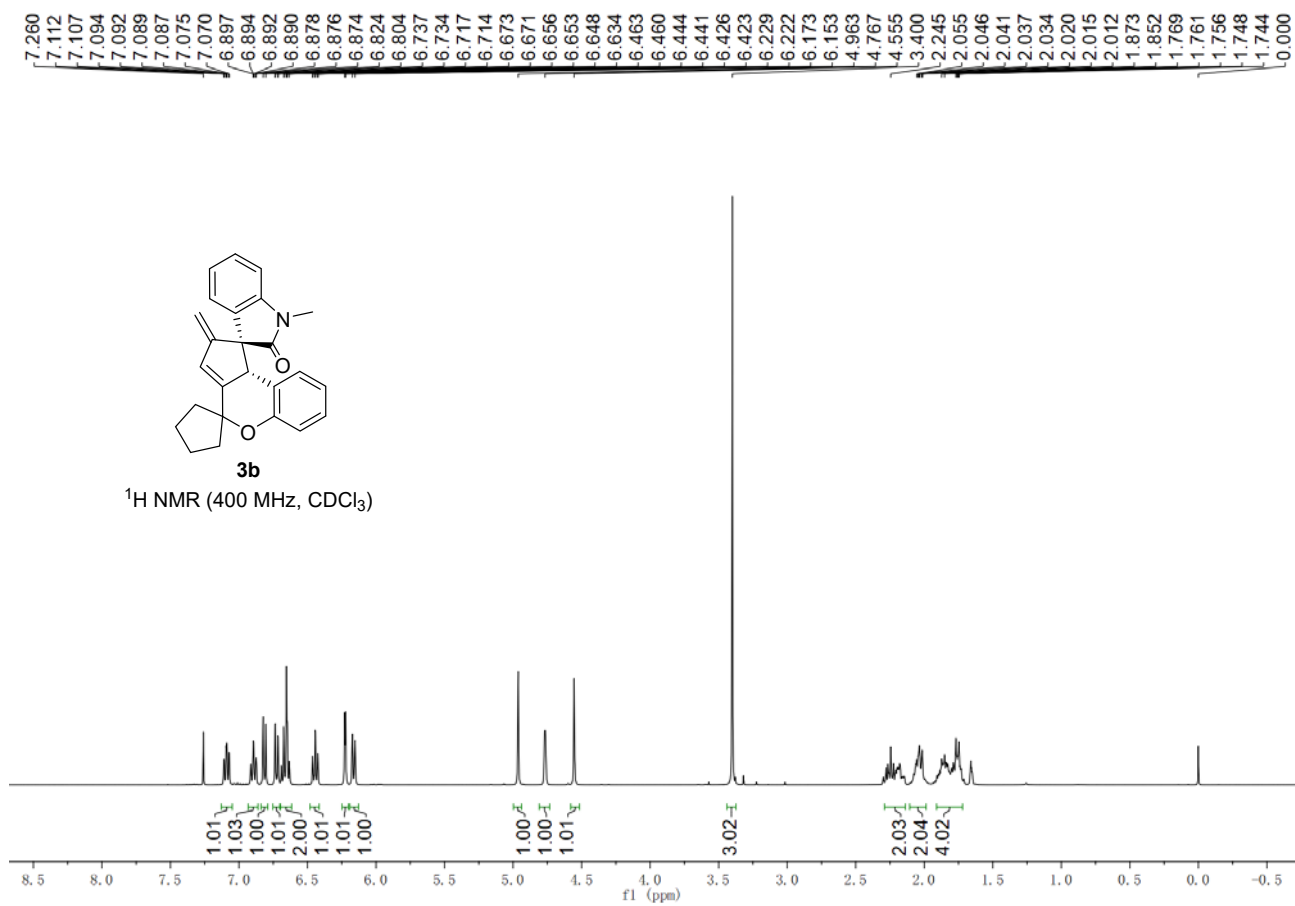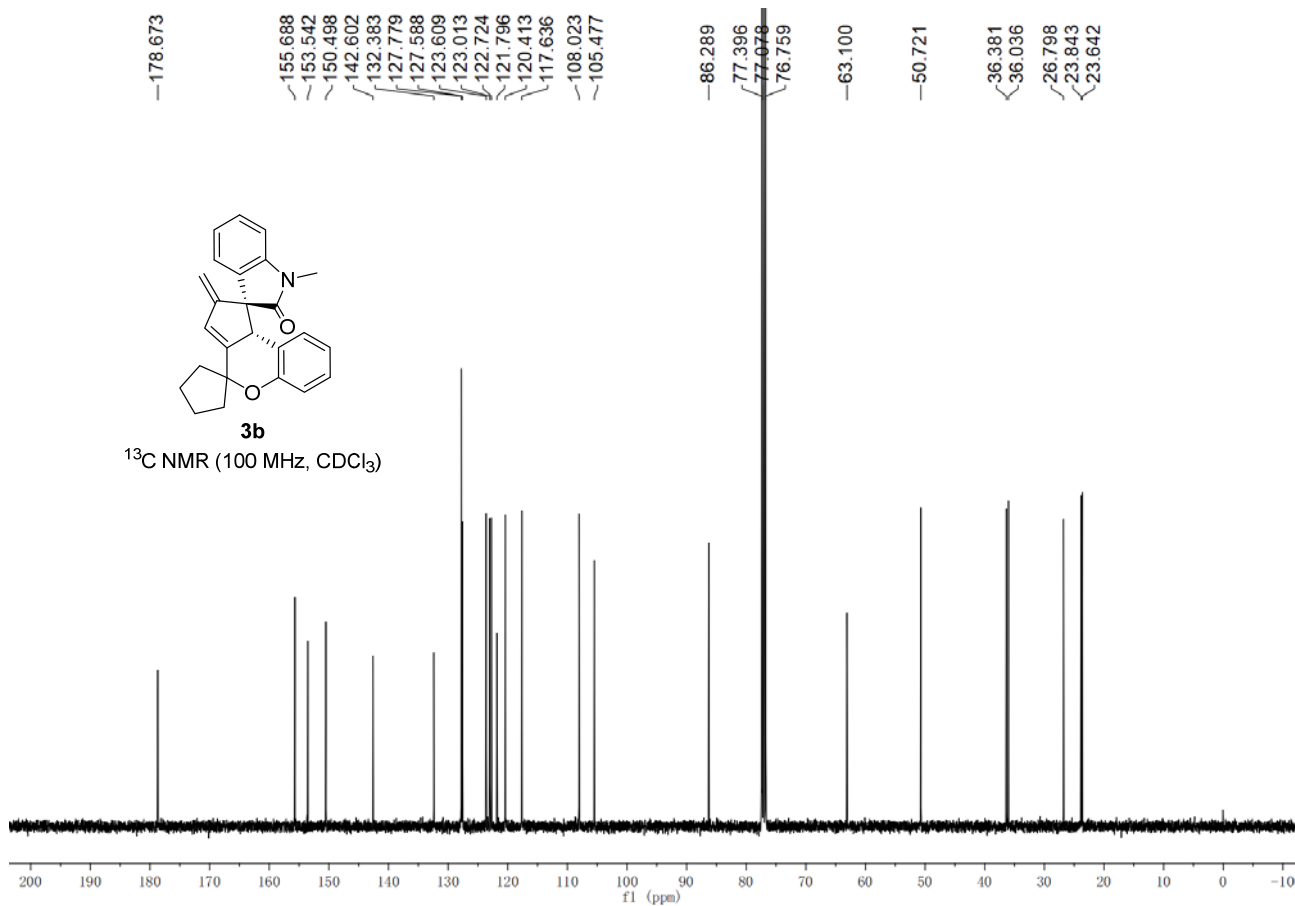

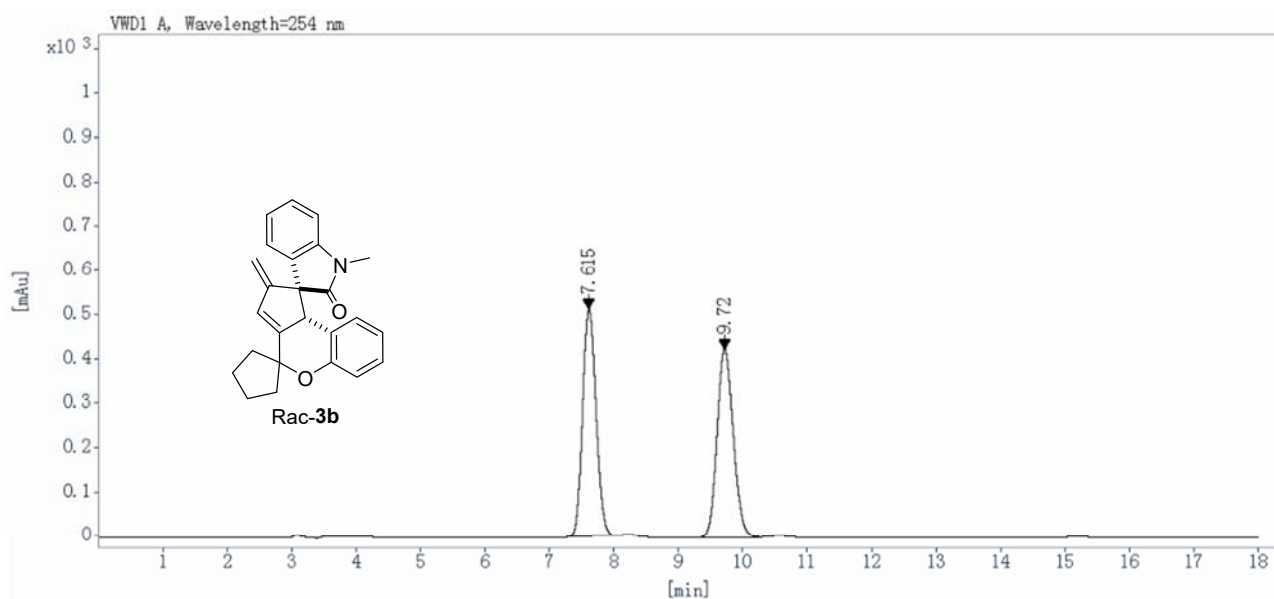

| Ret Time [min] | Peak Type | Width [min] | Height [mAU] | Area [mAU*s] | Area [%] |
|----------------|-----------|-------------|--------------|--------------|----------|
| 7.615          | BB        | 0.23        | 513.2851     | 7421.3164    | 50.0775  |
| 9.720          | BB        | 0.27        | 423.6620     | 7398.3569    | 49.9225  |
| Totals:        |           |             |              | 14819.6733   | 100.0000 |

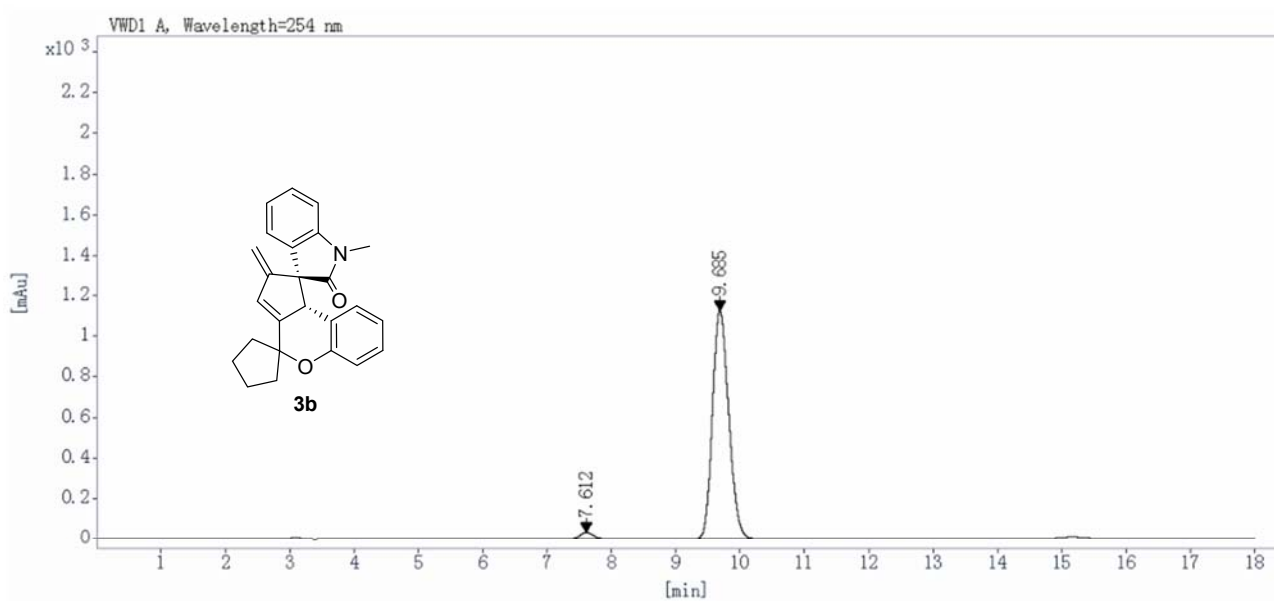

| Ret Time [min] | Peak Type | Width [min] | Height [mAU] | Area [mAU*s] | Area [%] |
|----------------|-----------|-------------|--------------|--------------|----------|
| 7.612          | BBA       | 0.22        | 32.6851      | 465.2503     | 2.3032   |
| 9.685          | BB        | 0.27        | 1125.0988    | 19734.8965   | 97.6968  |
| Totals:        |           |             |              | 20200.1468   | 100.0000 |

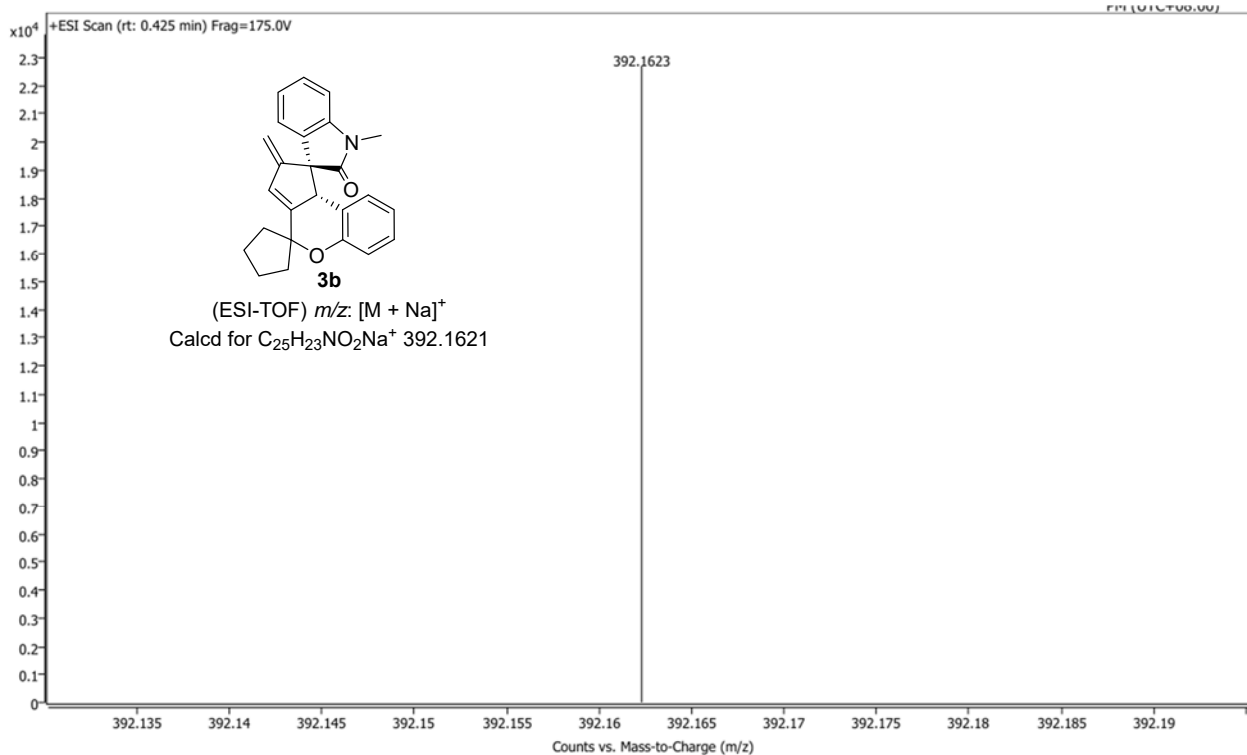

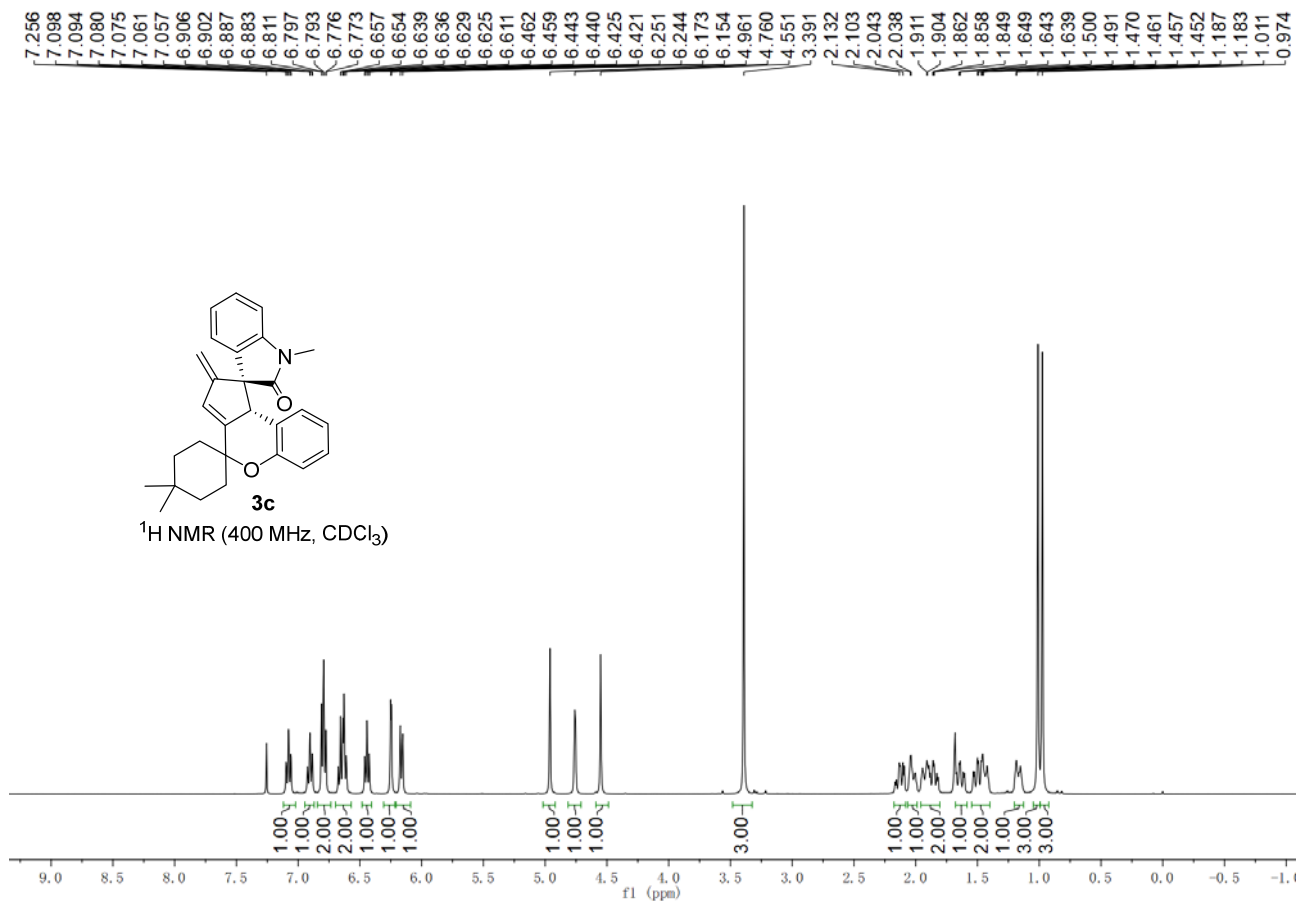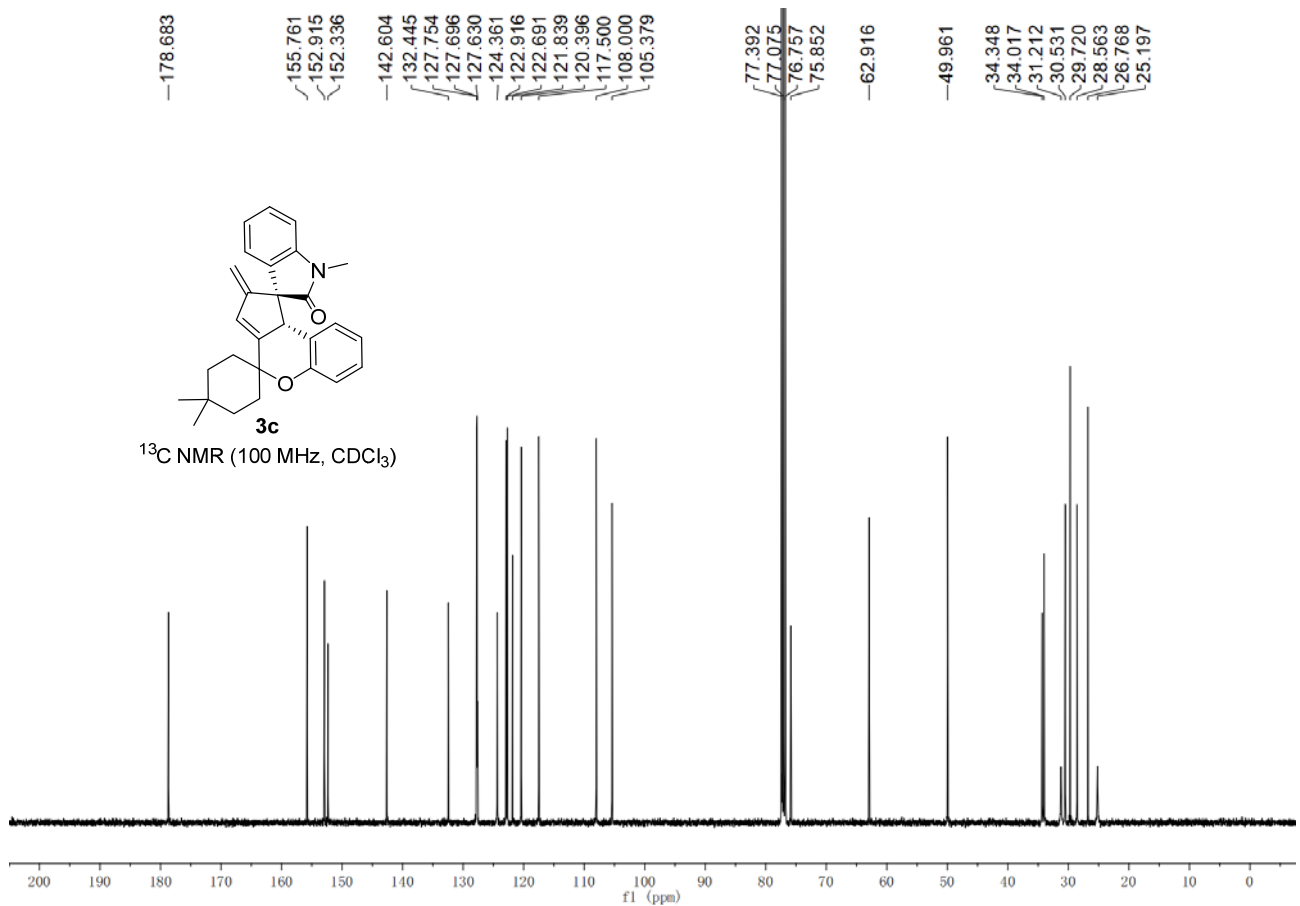

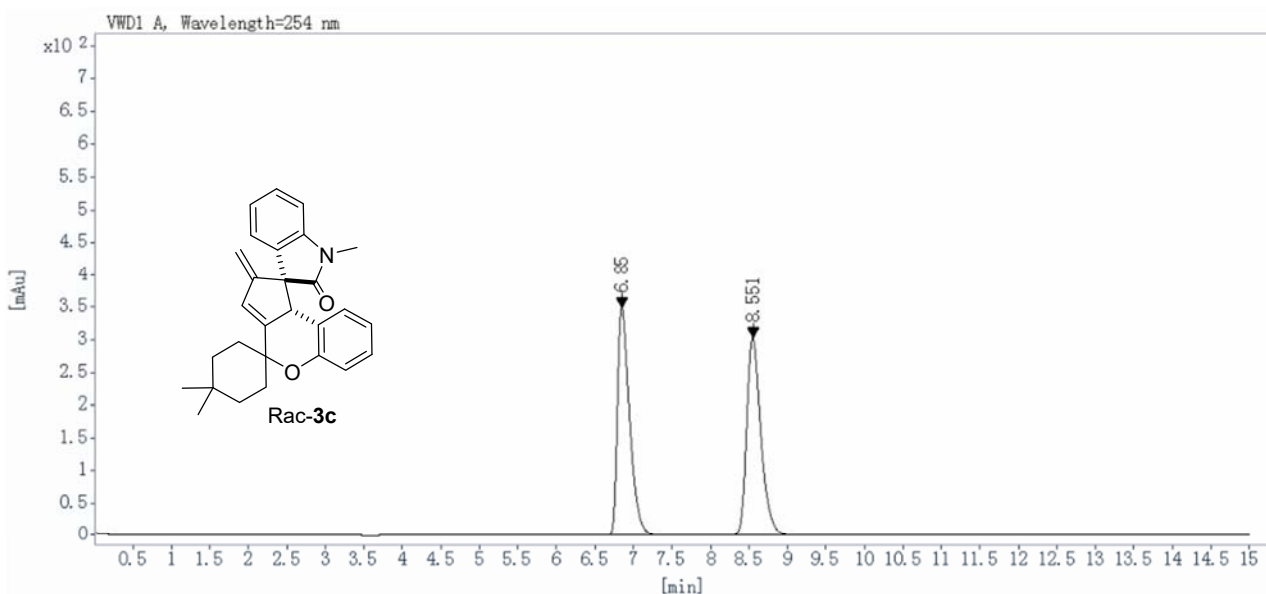

| Ret Time [min] | Peak Type | Width [min] | Height [mAU] | Area [mAU*s] | Area [%] |
|----------------|-----------|-------------|--------------|--------------|----------|
| 6.850          | BBA       | 0.17        | 349.2123     | 3864.9224    | 49.8809  |
| 8.551          | BBA       | 0.20        | 302.6716     | 3883.3809    | 50.1191  |
| Totals:        |           |             |              | 7748.3032    | 100.0000 |

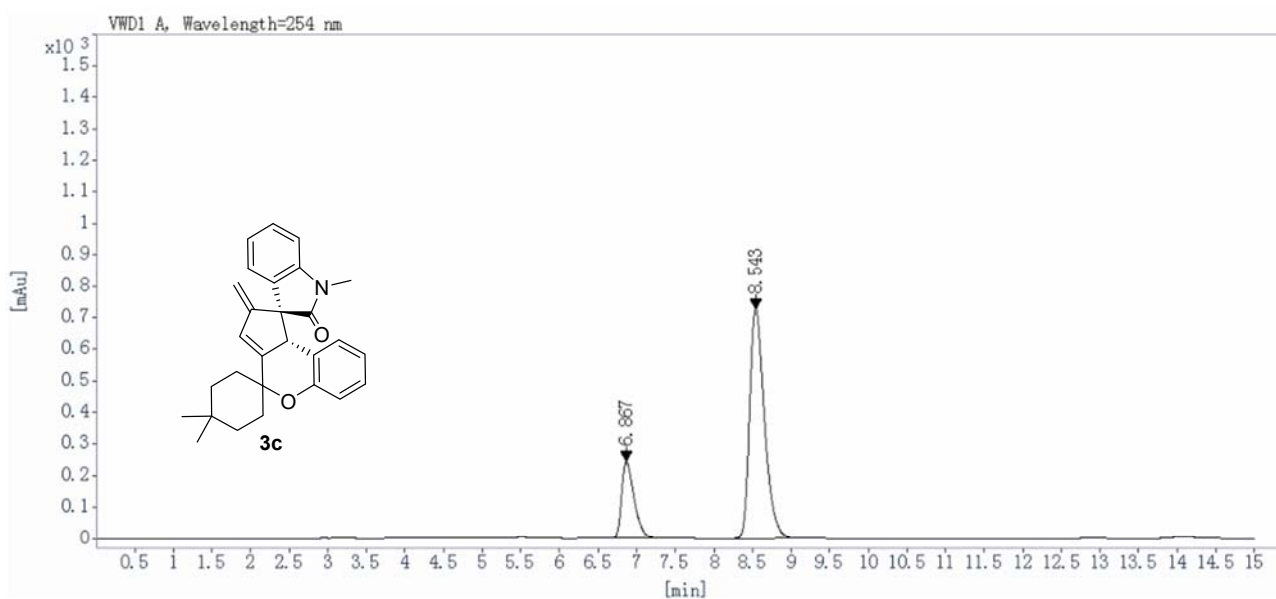

| Ret Time [min] | Peak Type | Width [min] | Height [mAU] | Area [mAU*s] | Area [%] |
|----------------|-----------|-------------|--------------|--------------|----------|
| 6.867          | BBA       | 0.18        | 243.2090     | 2777.2302    | 22.1981  |
| 8.543          | BBA       | 0.20        | 727.0814     | 9733.8750    | 77.8019  |
| Totals:        |           |             |              | 12511.1052   | 100.0000 |

Spectrum from 20240821.wif2 (sample 15) - 8, +TOF MS (200 - 600) from 0.063 to 0.111 min, noise filtered (noise multiplier = 1.5), Gaussian smoothed (0.5 points), centroided

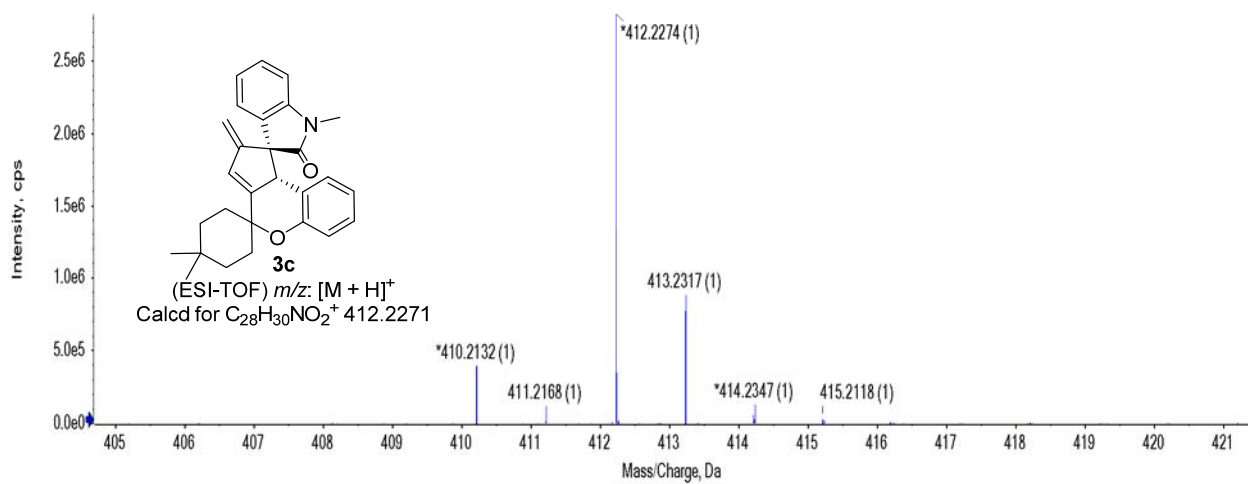

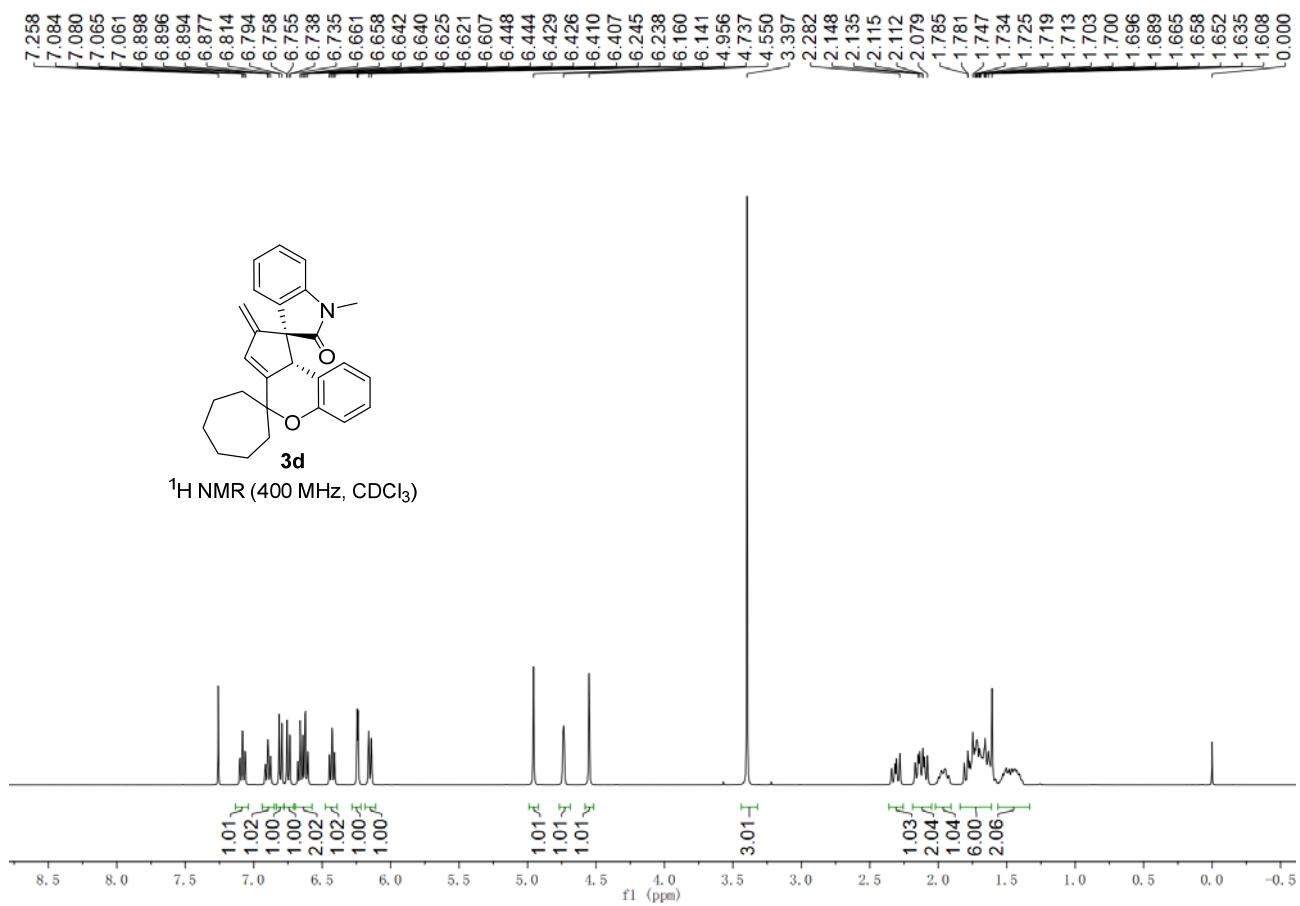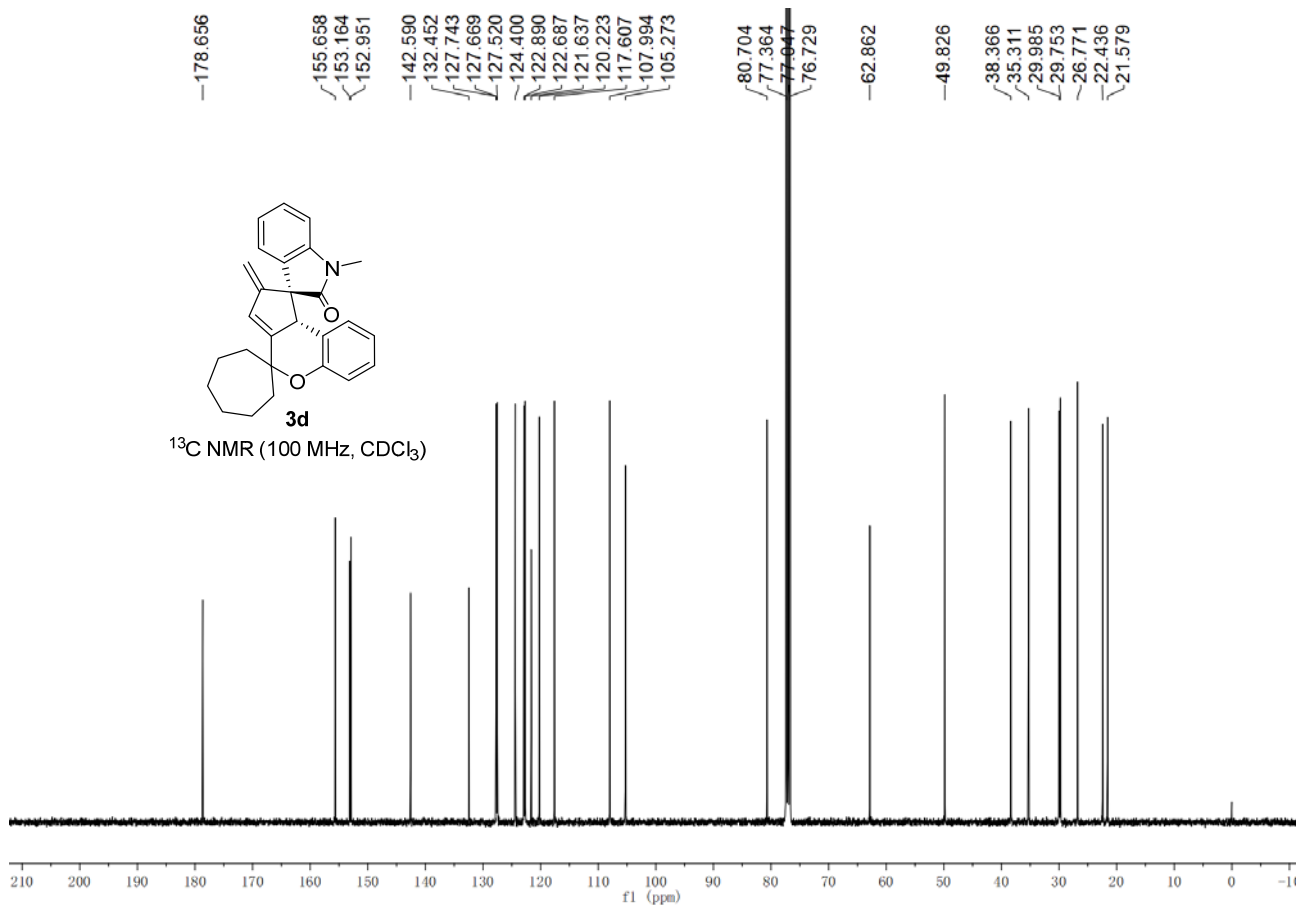

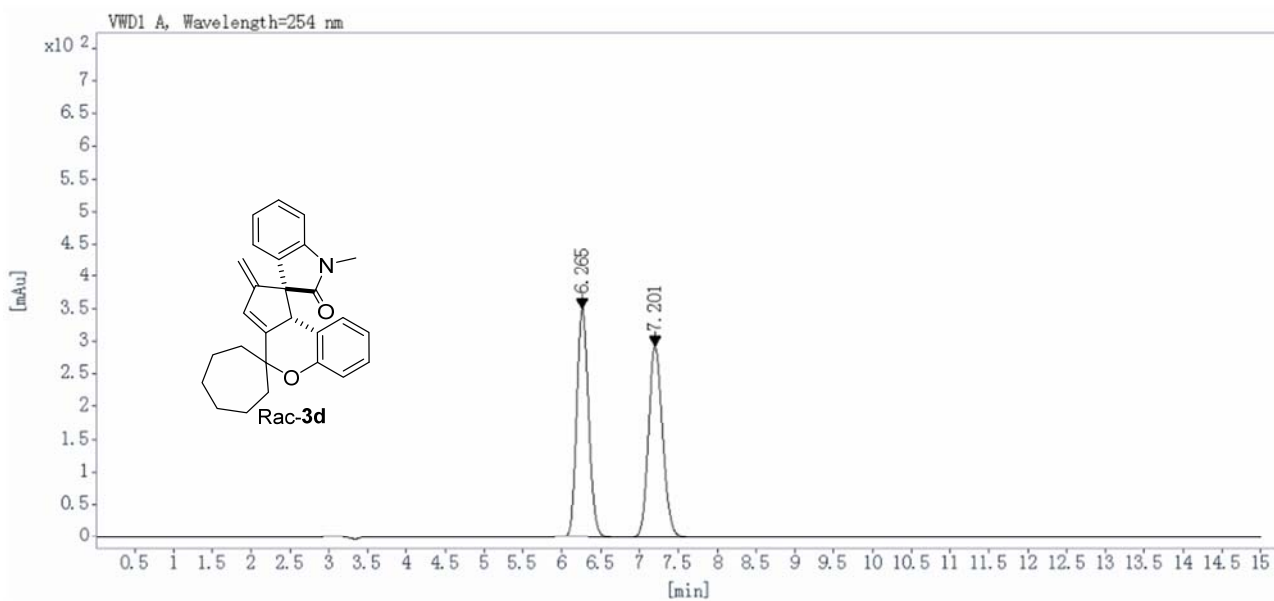

| Ret Time [min] | Peak Type | Width [min] | Height [mAU] | Area [mAU*s] | Area [%] |
|----------------|-----------|-------------|--------------|--------------|----------|
| 6.265          | BBA       | 0.16        | 349.9322     | 3710.8174    | 49.8768  |
| 7.201          | BBA       | 0.20        | 291.8110     | 3729.1545    | 50.1232  |
| Totals:        |           |             |              | 7439.9719    | 100.0000 |

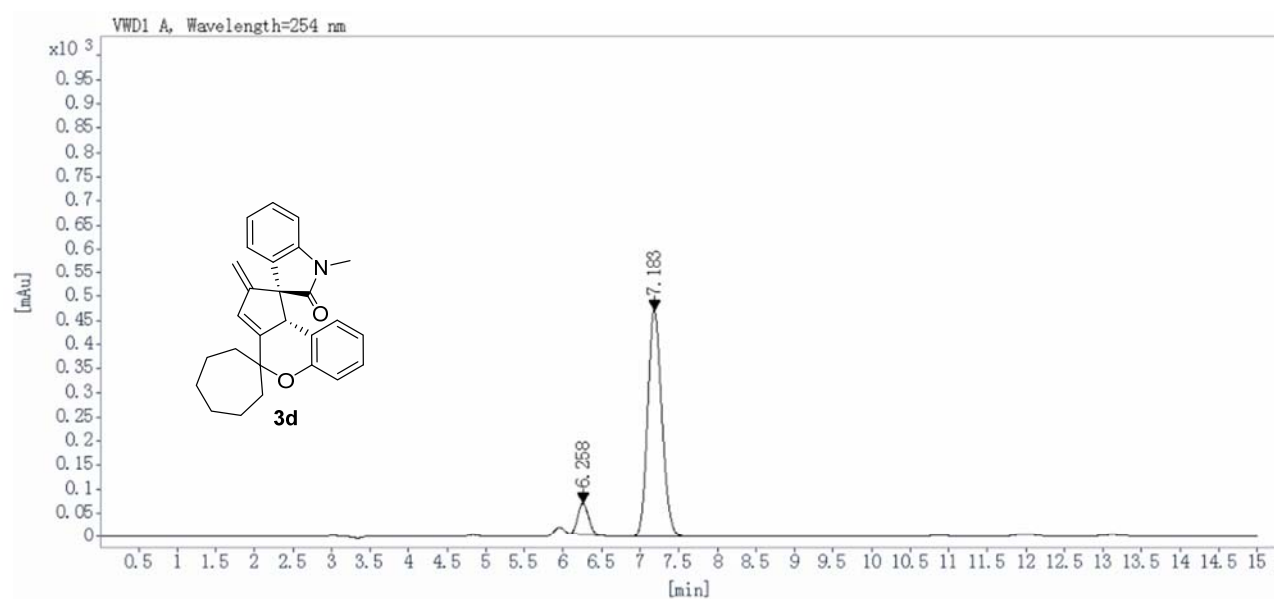

| Ret Time [min] | Peak Type | Width [min] | Height [mAU] | Area [mAU*s] | Area [%] |
|----------------|-----------|-------------|--------------|--------------|----------|
| 6.258          | BBA       | 0.15        | 65.9337      | 642.6335     | 9.5210   |
| 7.183          | BBA       | 0.20        | 471.5378     | 6107.0034    | 90.4790  |
| Totals:        |           |             |              | 6749.6369    | 100.0000 |



Spectrum from 20230517.wiff2 (sample 97) - 61, +TOF MS (200 - 800) from 0.073 to 0.099 min, subtra... by: [Spectrum from 20230517.wiff2 (sample 97) - 61, +TOF MS (200 - 800) from 1.326 to 1.543 min]

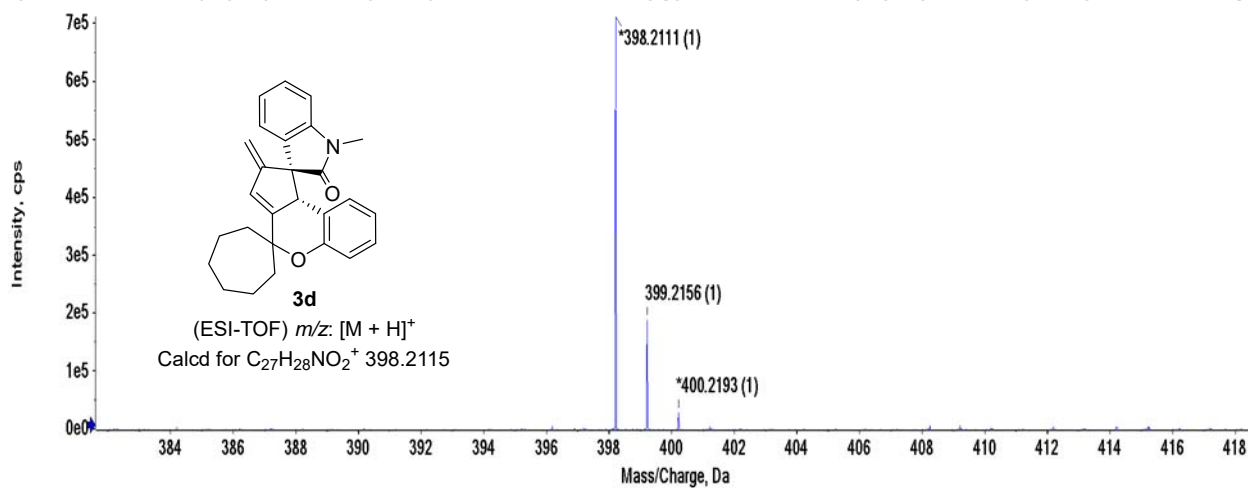

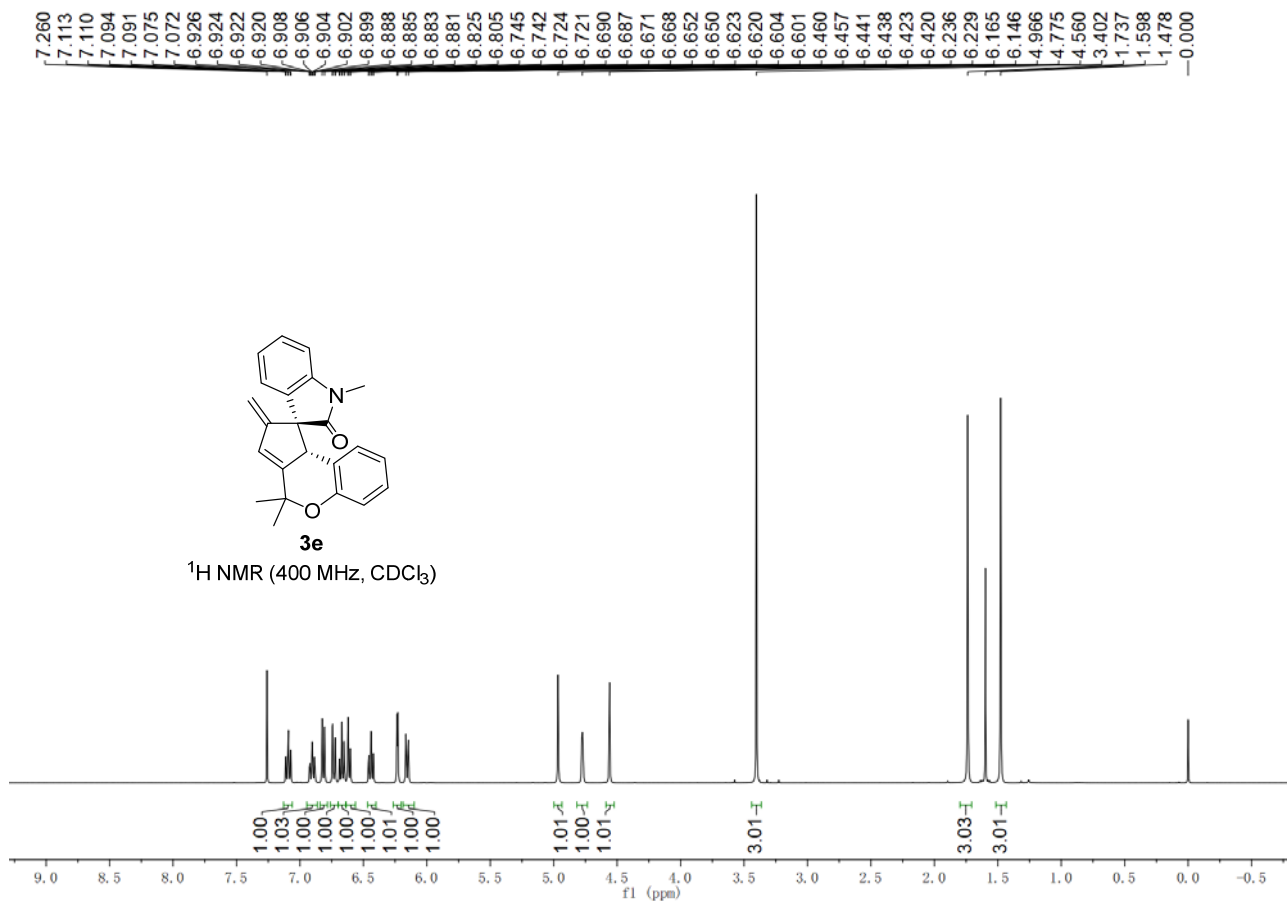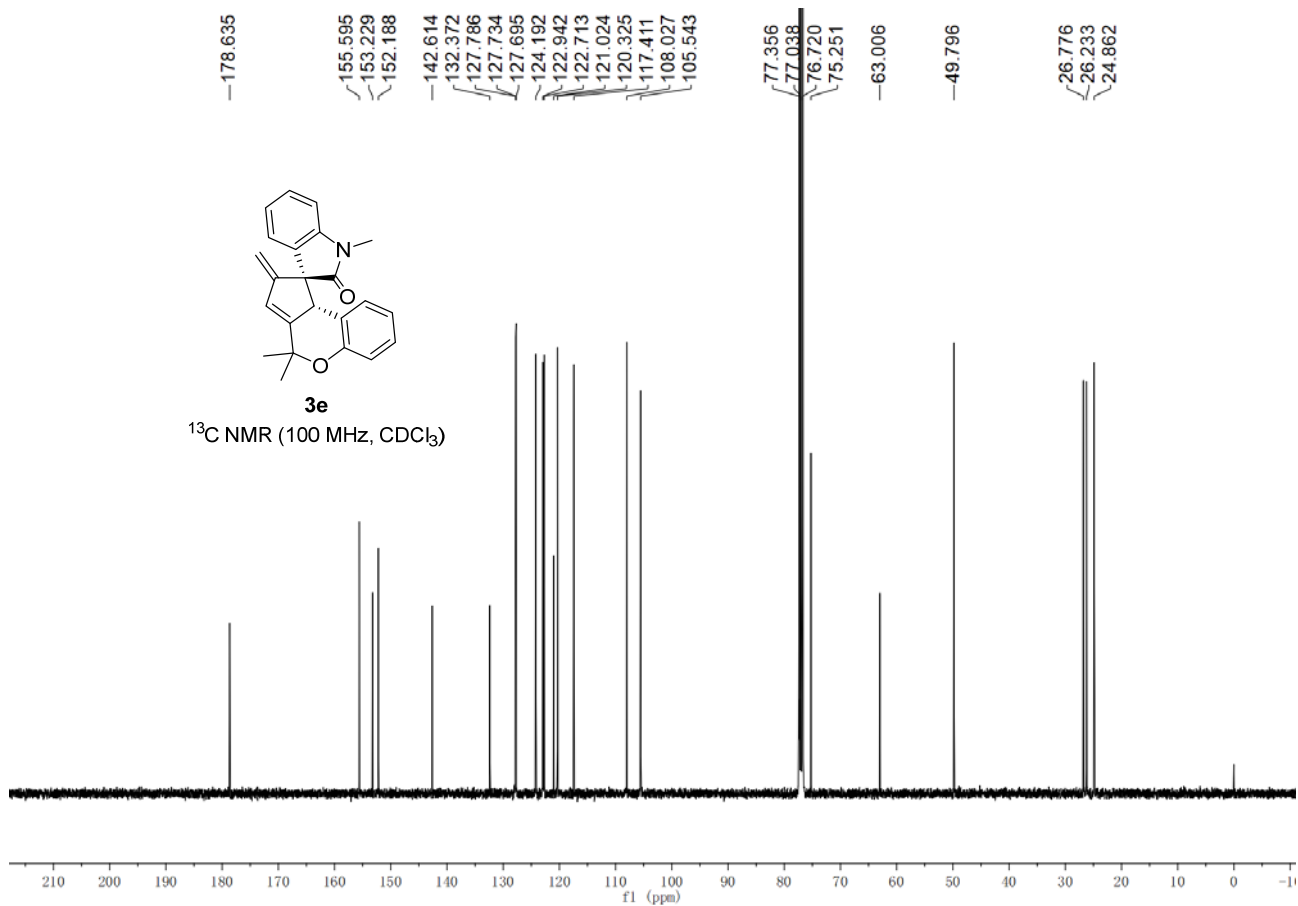

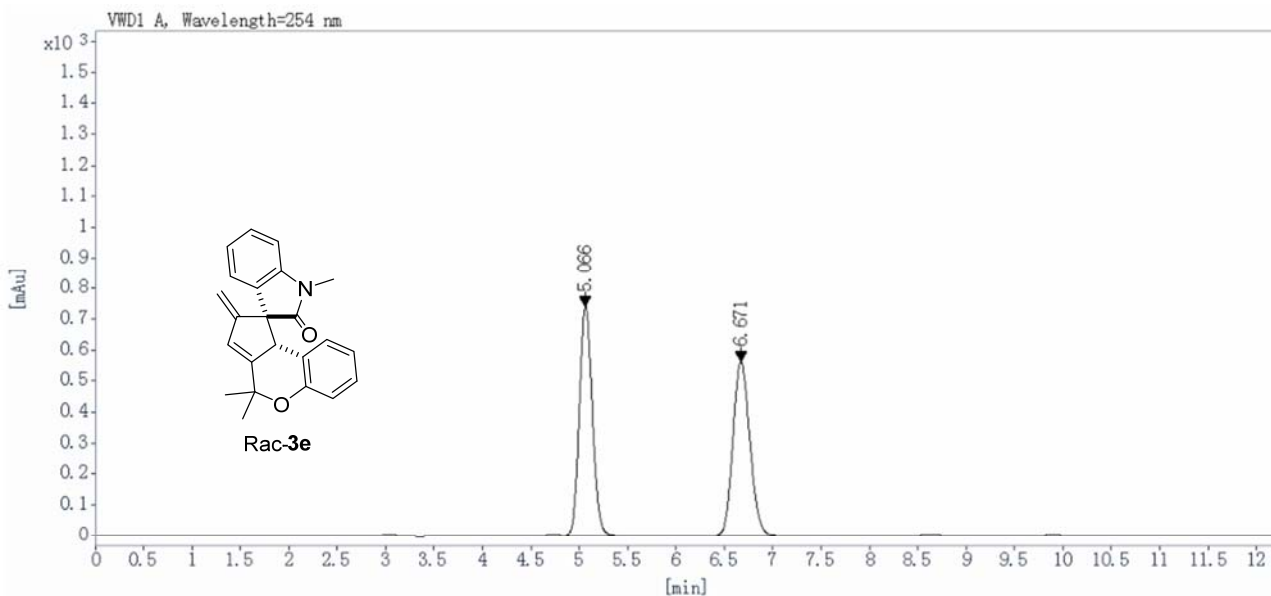

| Ret Time [min] | Peak Type | Width [min] | Height [mAU] | Area [mAU*s] | Area [%] |
|----------------|-----------|-------------|--------------|--------------|----------|
| 5.066          | BBA       | 0.15        | 741.8915     | 6873.9385    | 50.0958  |
| 6.671          | BBA       | 0.19        | 561.2289     | 6847.6372    | 49.9042  |
| Totals:        |           |             |              | 13721.5757   | 100.0000 |

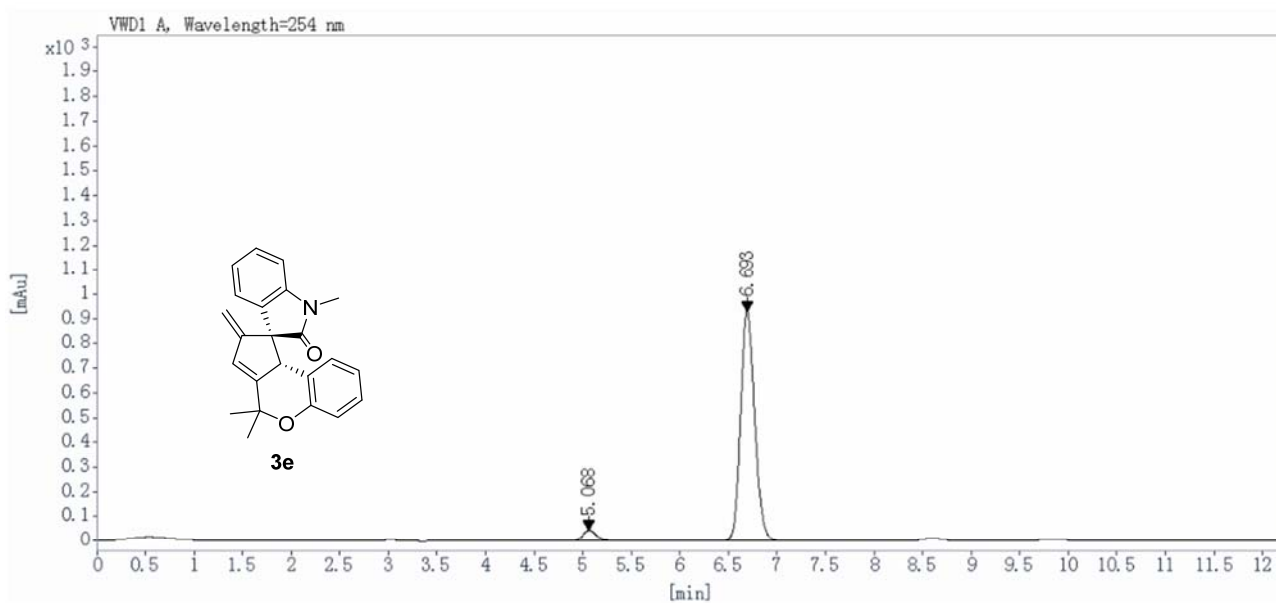

| Ret Time [min] | Peak Type | Width [min] | Height [mAU] | Area [mAU*s] | Area [%] |
|----------------|-----------|-------------|--------------|--------------|----------|
| 5.068          | BBA       | 0.15        | 41.3812      | 384.0868     | 3.9358   |
| 6.693          | BBA       | 0.16        | 929.2313     | 9374.7246    | 96.0642  |
| Totals:        |           |             |              | 9758.8114    | 100.0000 |

Spectrum from 20230705.wif2 (sample 77) - 72, +TOF MS (100 - 600) from 0.053 to 0.114 min, noise filtered (noise multiplier = 1.5), Gaussian smoothed (0.5 points), centroided

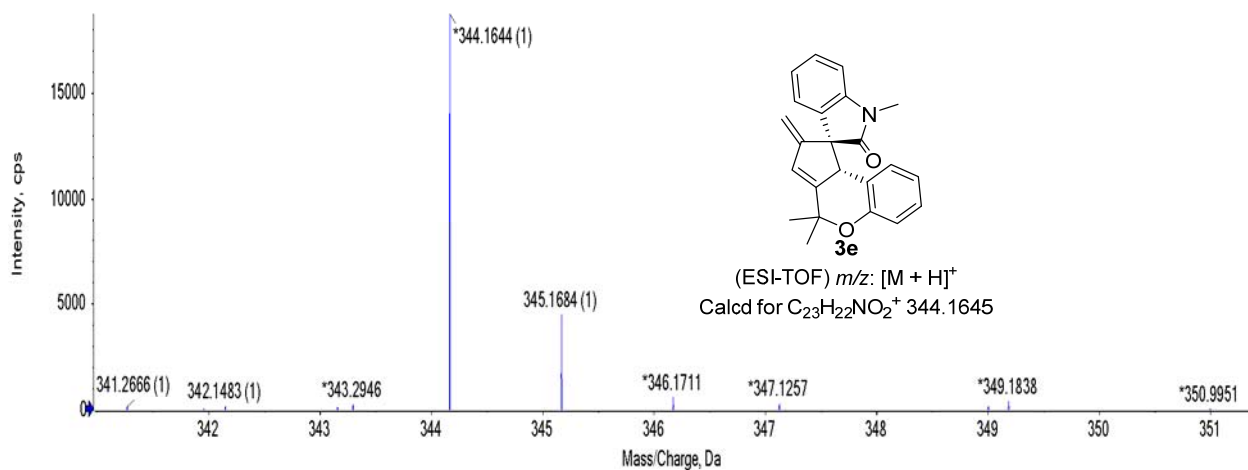

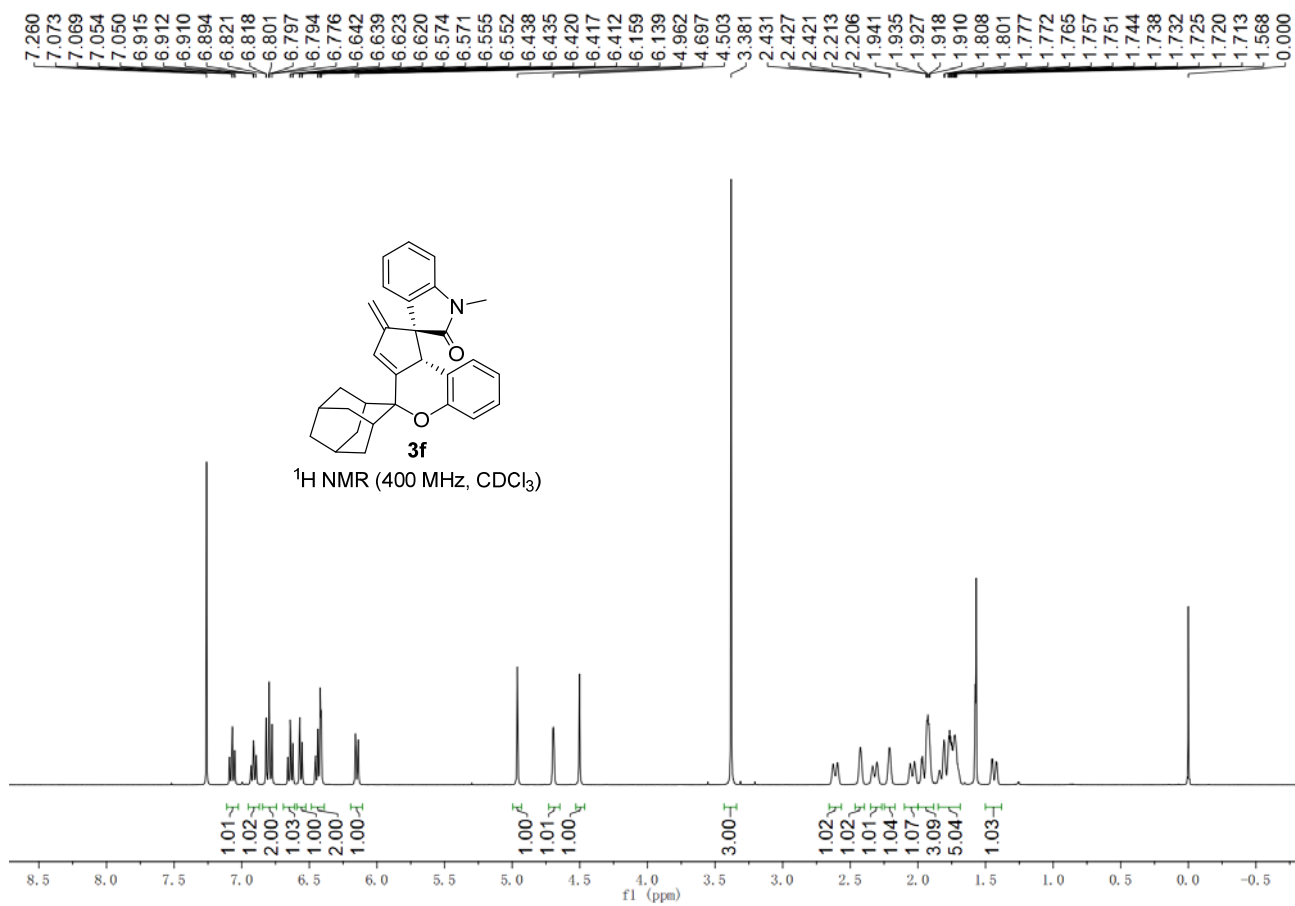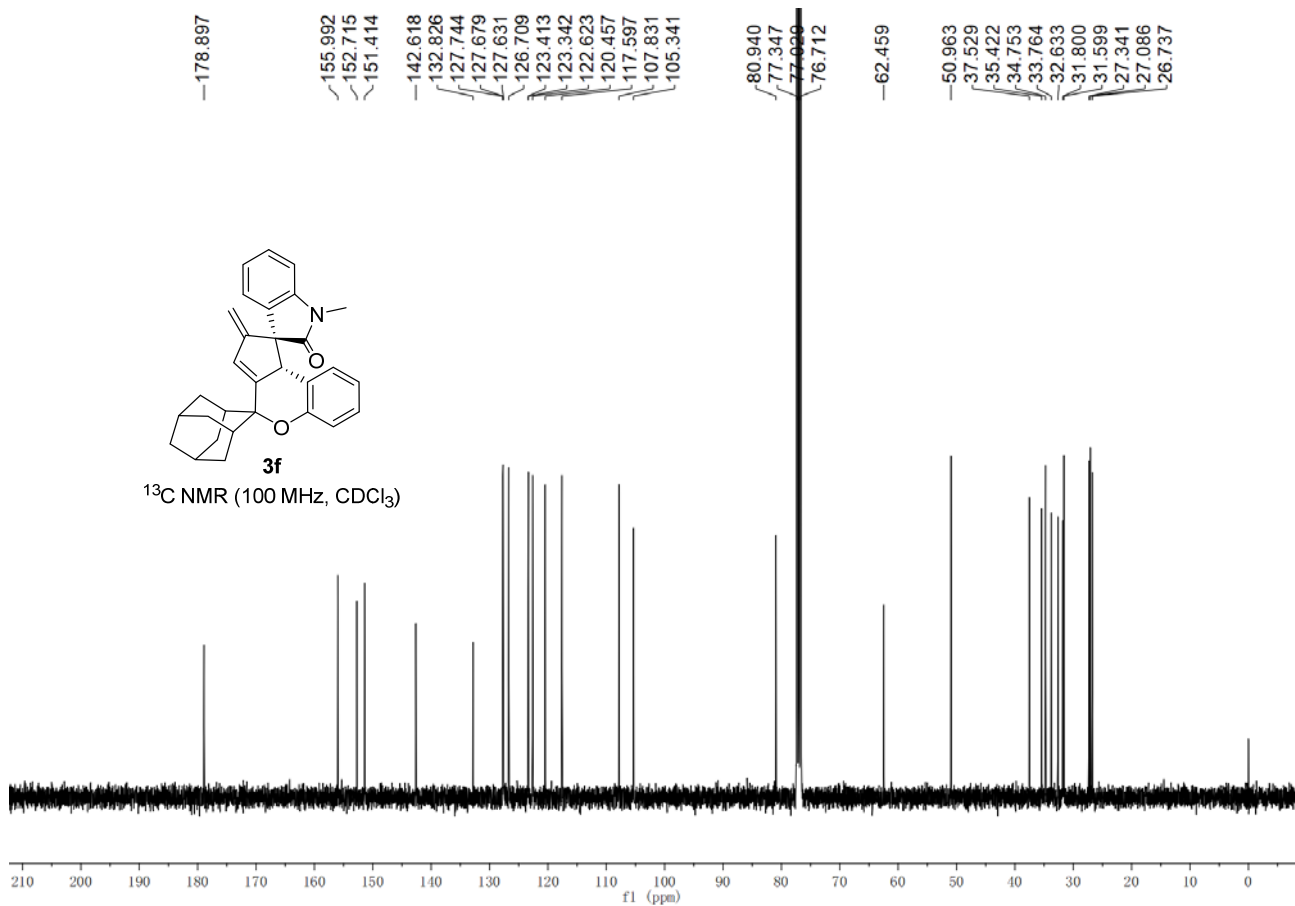

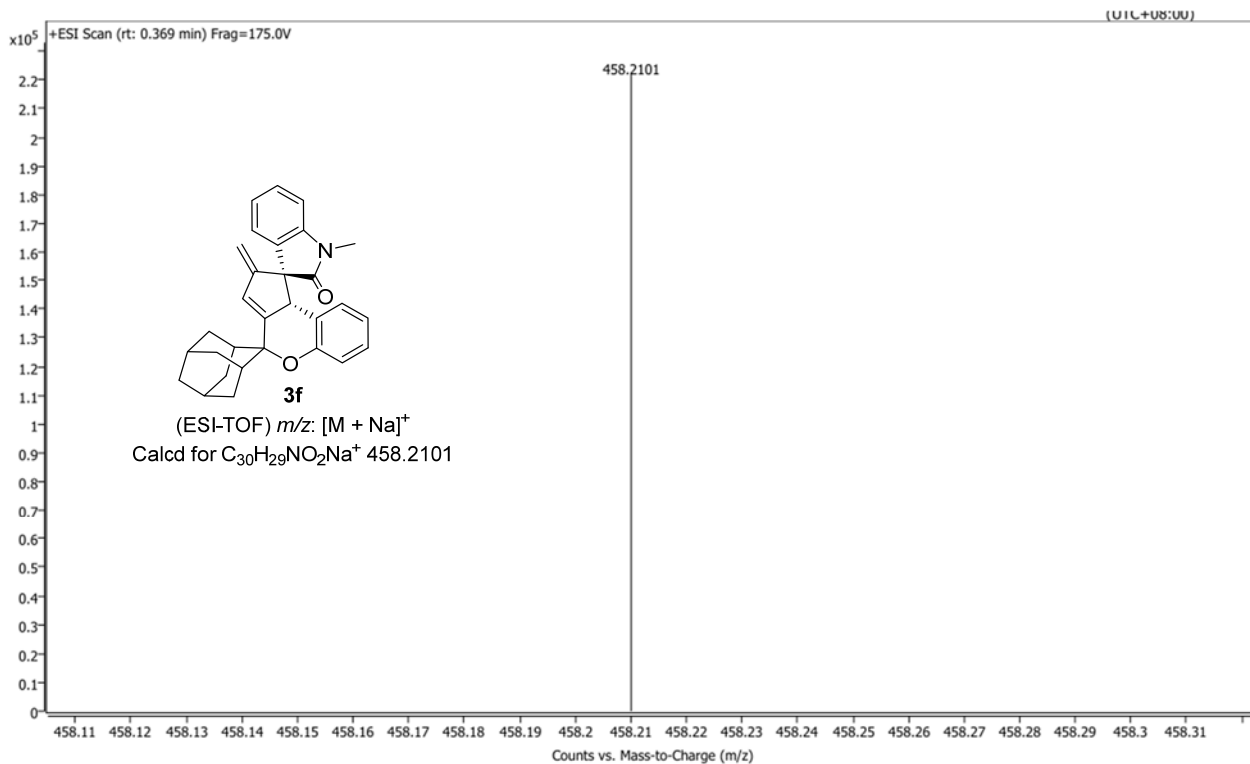

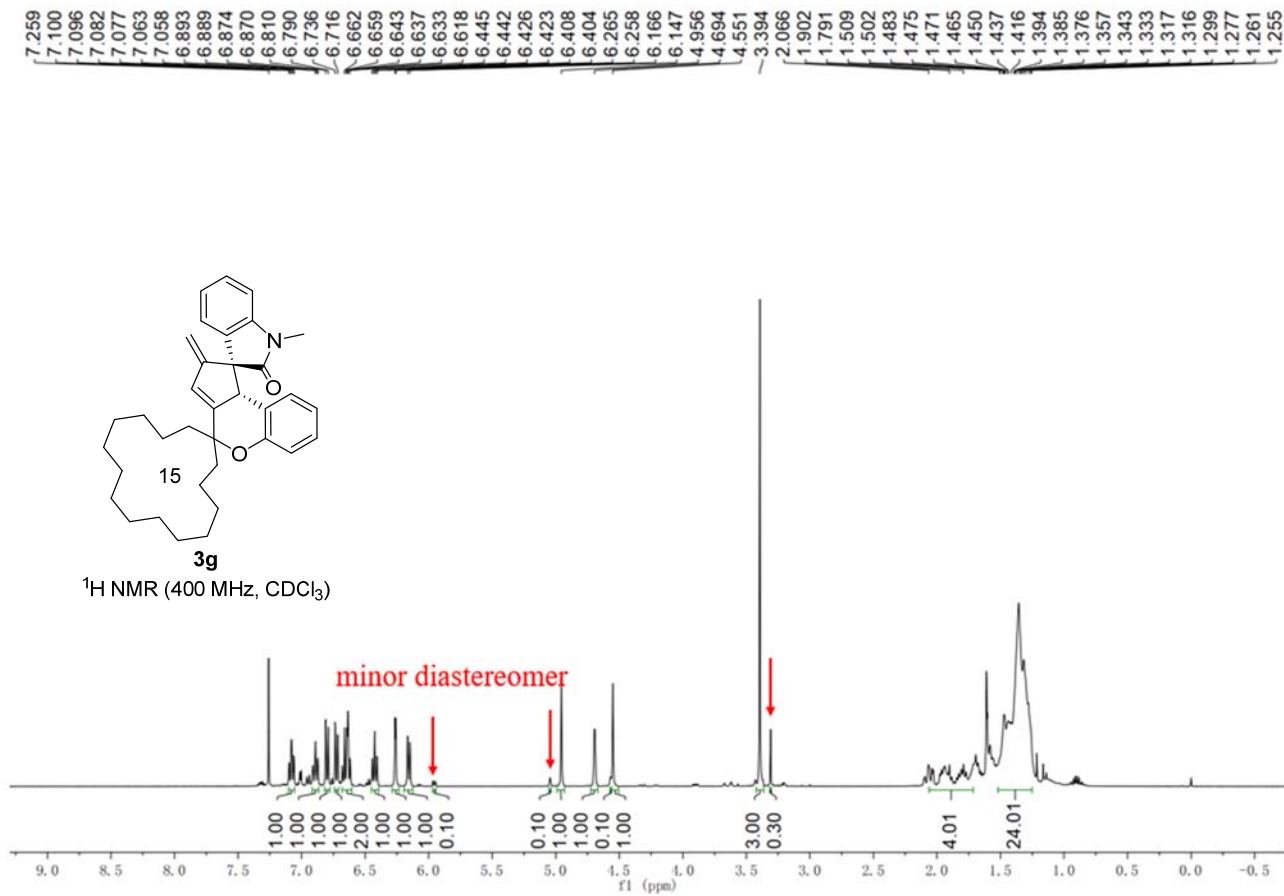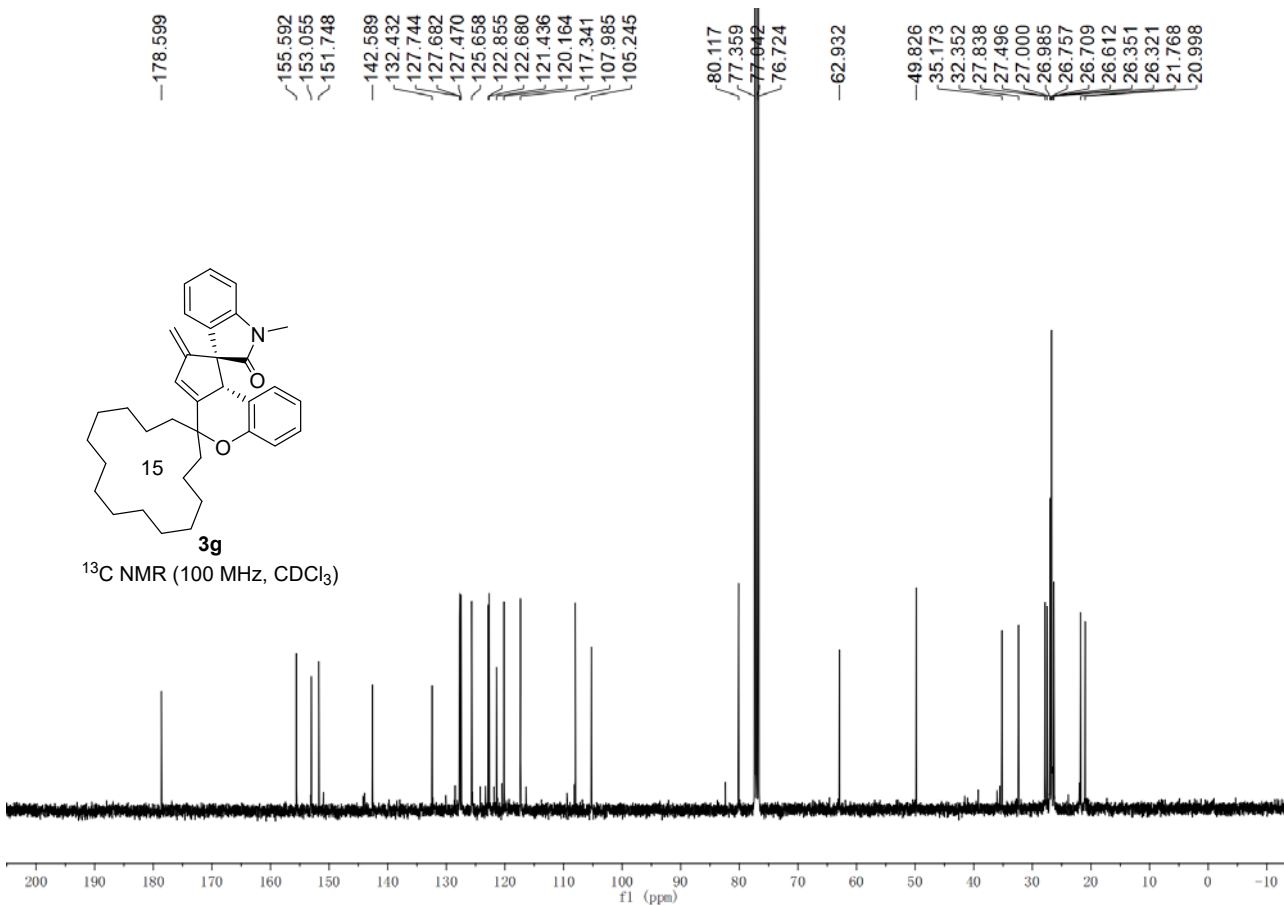

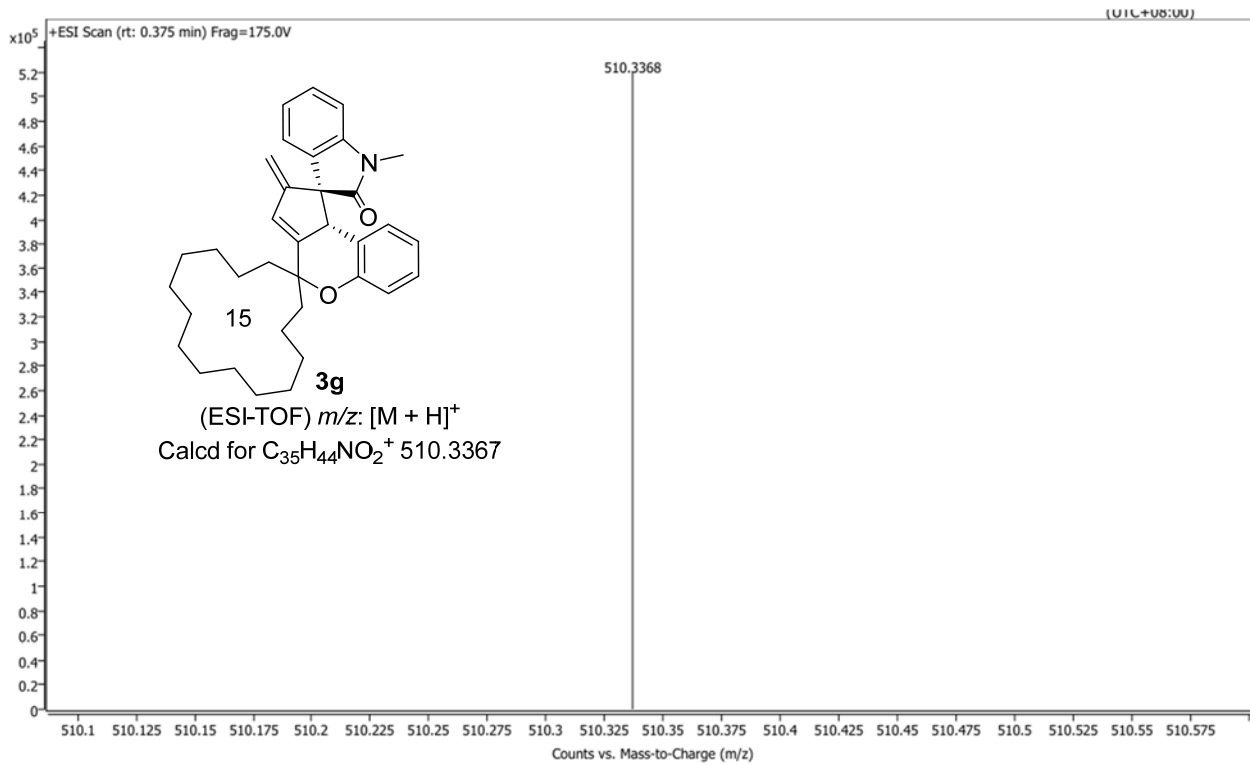



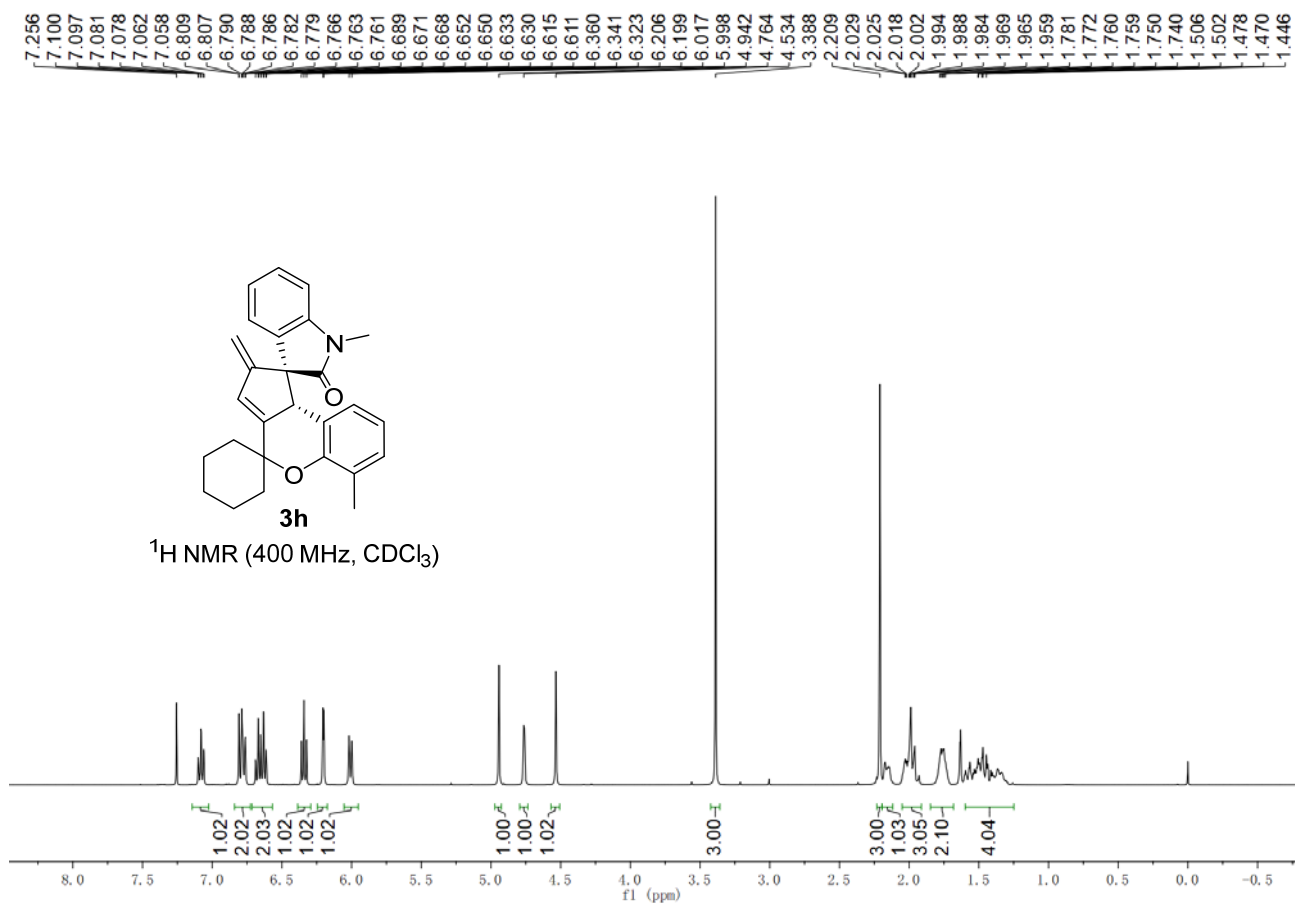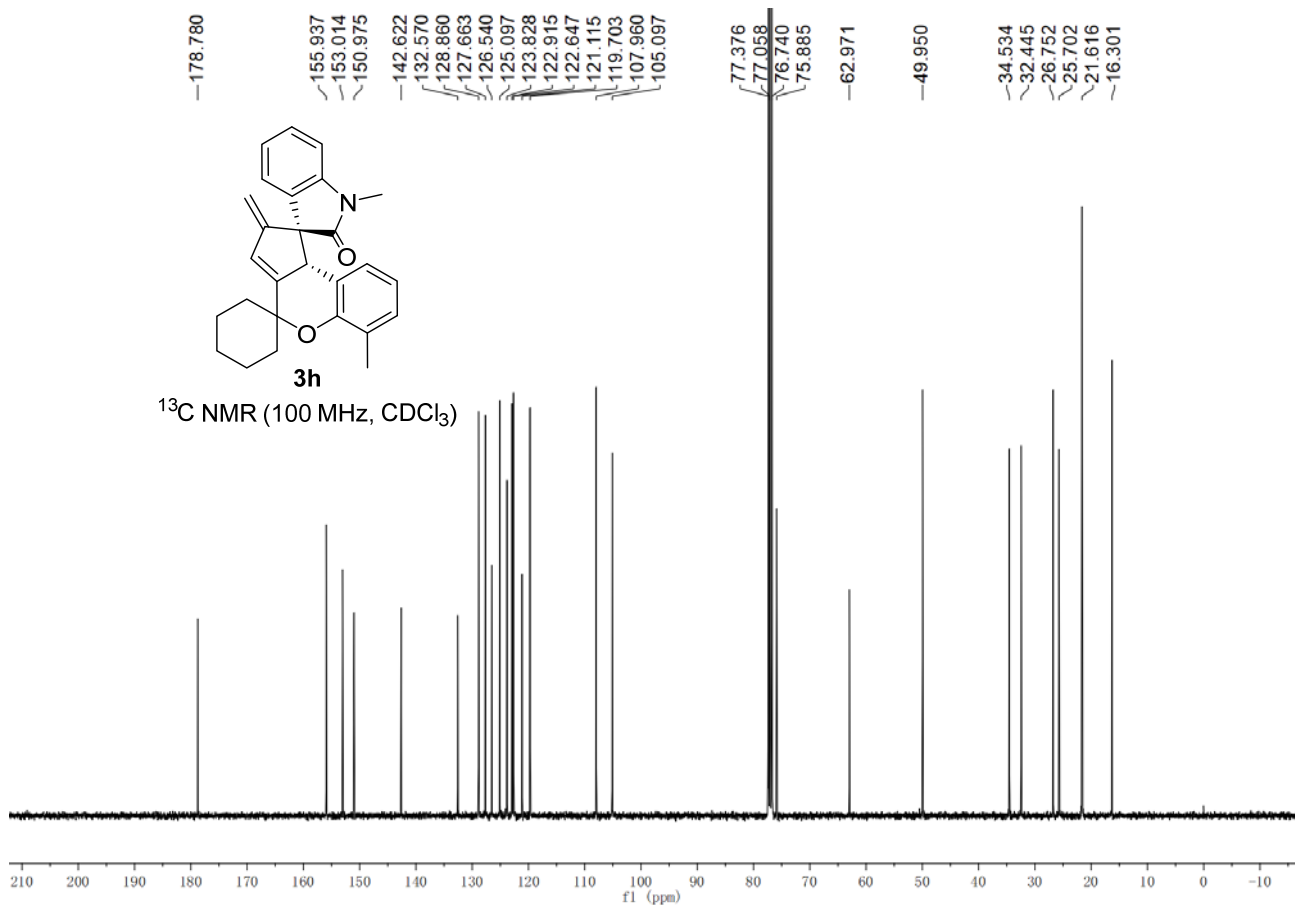

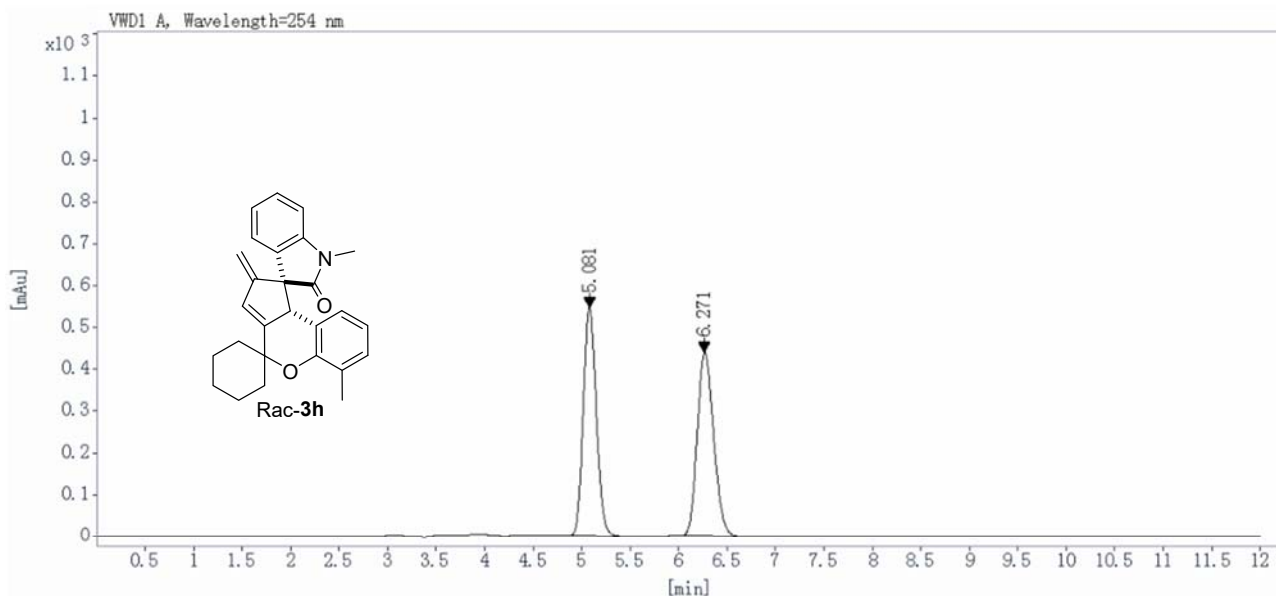

| Ret Time [min] | Peak Type | Width [min] | Height [mAU] | Area [mAU*s] | Area [%] |
|----------------|-----------|-------------|--------------|--------------|----------|
| 5.081          | BBA       | 0.15        | 546.0235     | 5105.6519    | 49.6539  |
| 6.271          | BBA       | 0.18        | 438.4892     | 5176.8340    | 50.3461  |
| Totals:        |           |             |              | 10282.4858   | 100.0000 |

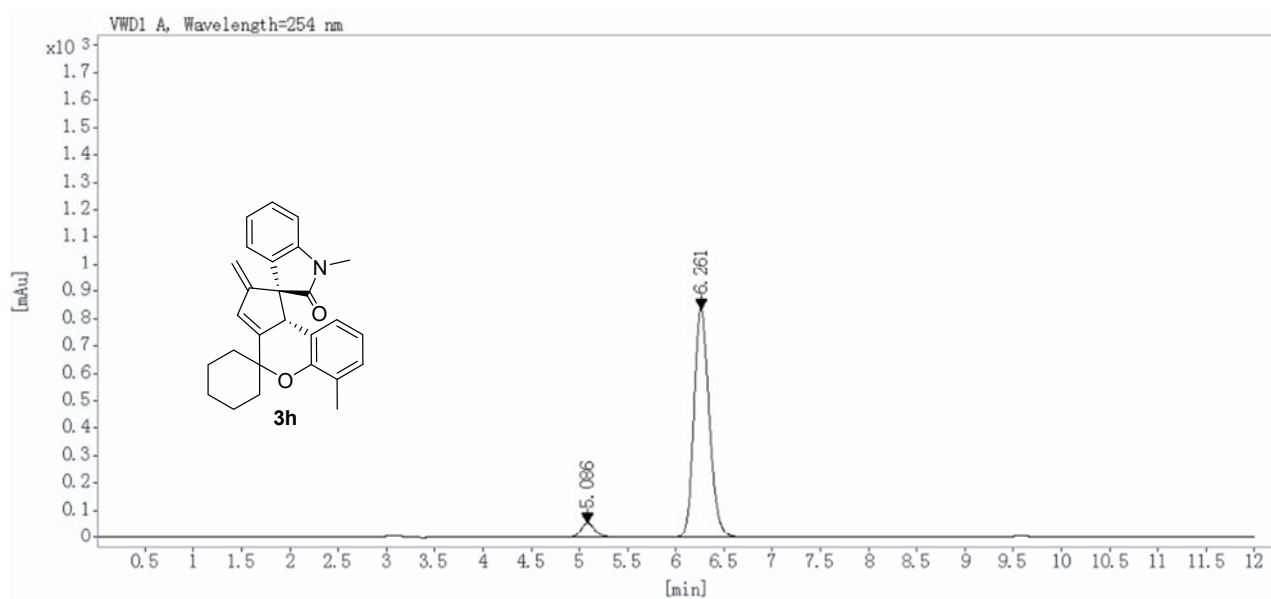

| Ret Time [min] | Peak Type | Width [min] | Height [mAU] | Area [mAU*s] | Area [%] |
|----------------|-----------|-------------|--------------|--------------|----------|
| 5.086          | BBA       | 0.15        | 52.6610      | 507.6499     | 5.2306   |
| 6.261          | BBA       | 0.17        | 833.6223     | 9197.7656    | 94.7694  |
| Totals:        |           |             |              | 9705.4156    | 100.0000 |

Spectrum from 20230517.wiff2 (sample 96) - 60, +TOF MS (200 - 800) from 0.088 to 0.113 min, subtra... by: [Spectrum from 20230517.wiff2 (sample 96) - 60, +TOF MS (200 - 800) from 1.326 to 1.543 min]

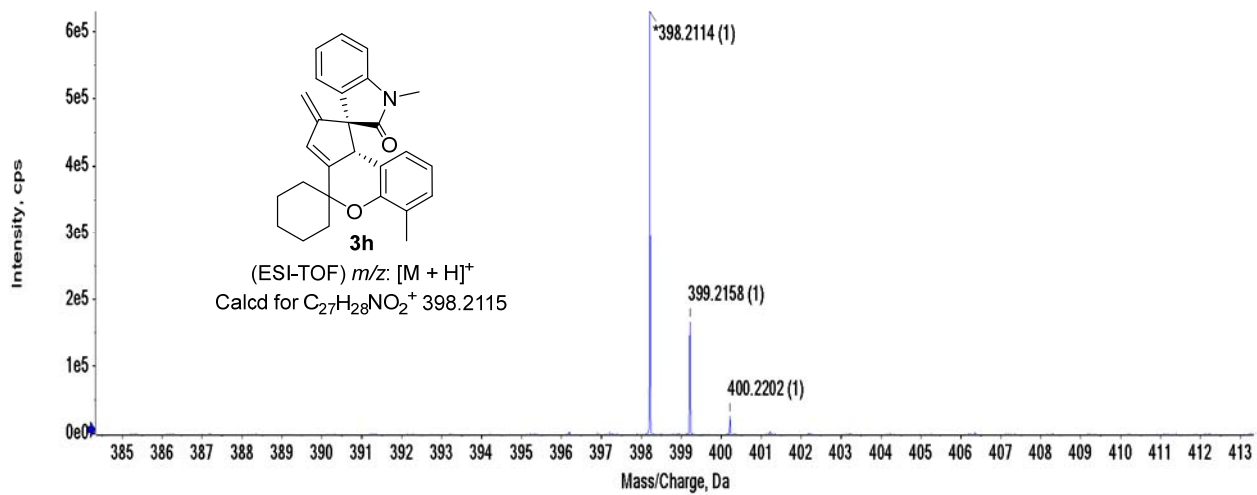

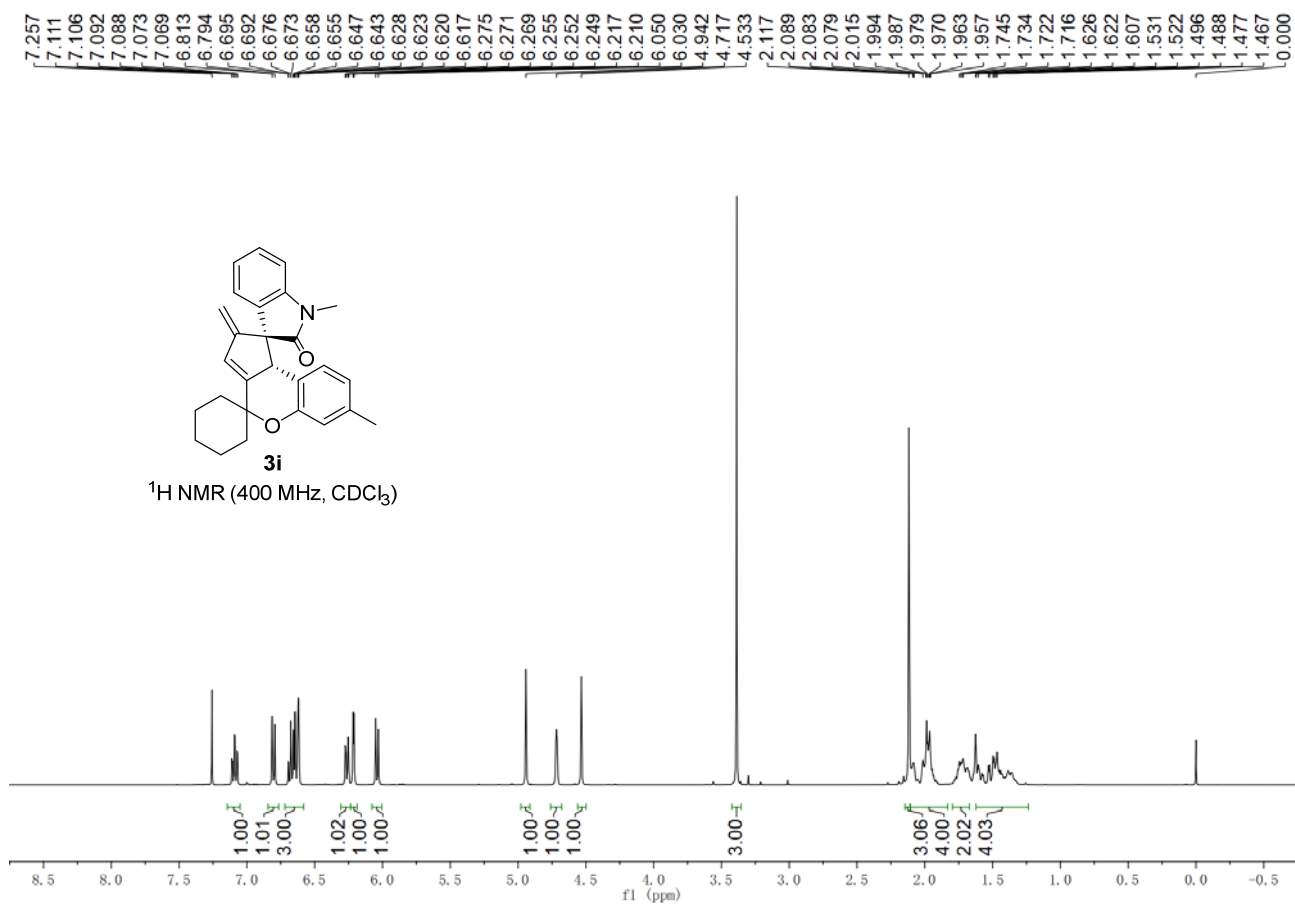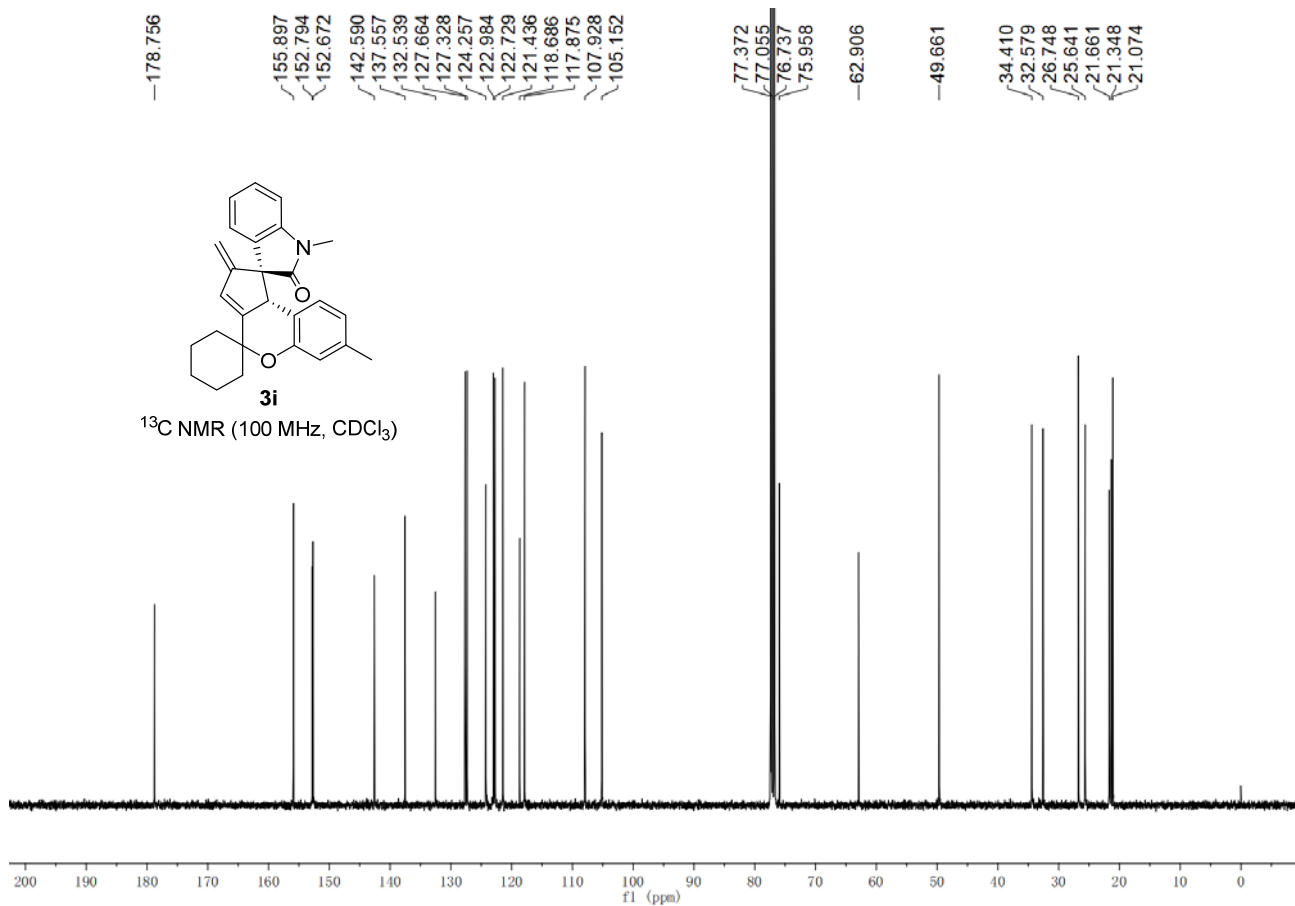

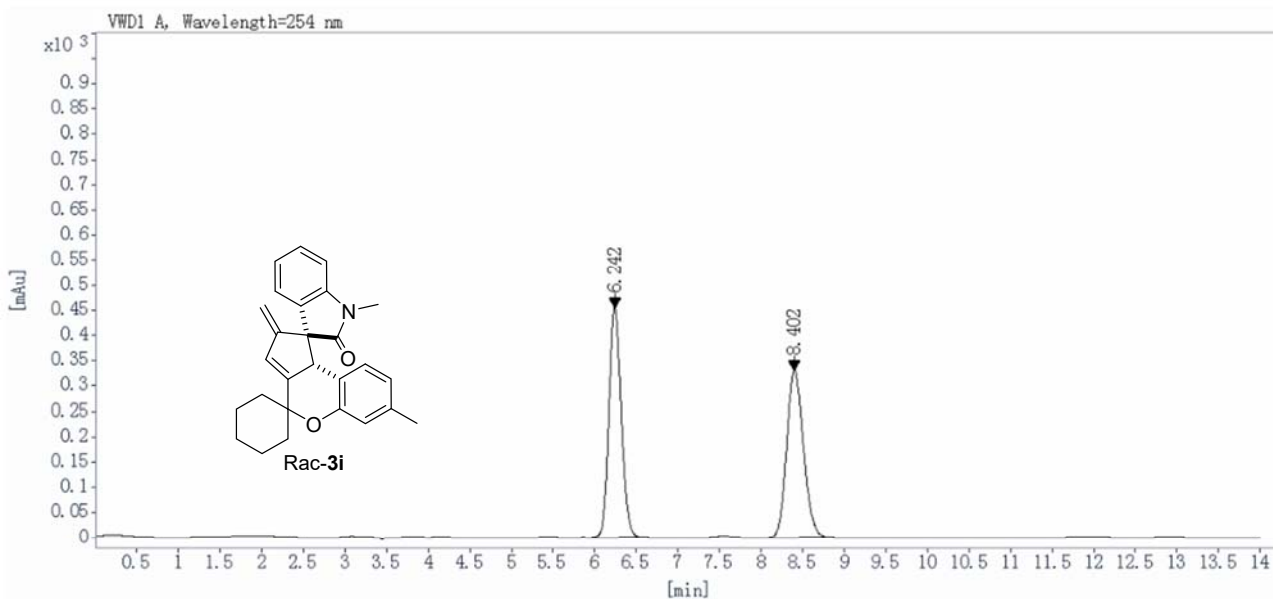

| Ret Time [min] | Peak Type | Width [min] | Height [mAU] | Area [mAU*s] | Area [%] |
|----------------|-----------|-------------|--------------|--------------|----------|
| 6.242          | BBA       | 0.16        | 454.1411     | 4702.7432    | 50.2738  |
| 8.402          | BBA       | 0.22        | 330.2756     | 4651.5200    | 49.7262  |
| Totals:        |           |             |              | 9354.2632    | 100.0000 |

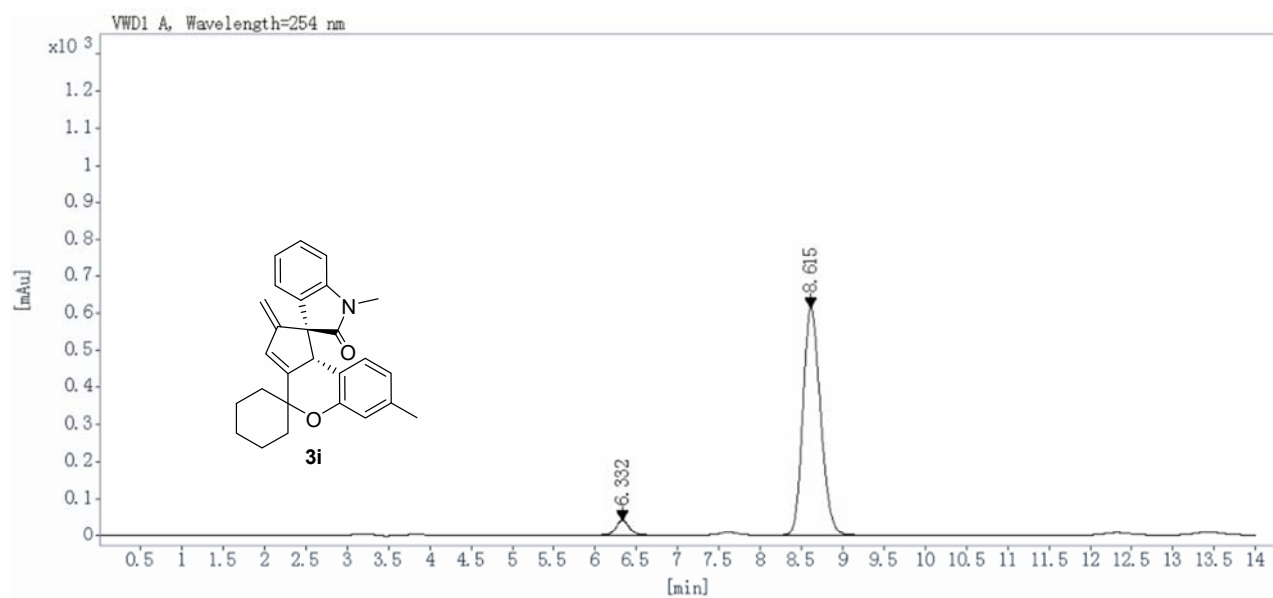

| Ret Time [min] | Peak Type | Width [min] | Height [mAU] | Area [mAU*s] | Area [%] |
|----------------|-----------|-------------|--------------|--------------|----------|
| 6.332          | BBA       | 0.17        | 41.2327      | 461.6652     | 4.8121   |
| 8.615          | BBA       | 0.23        | 614.2065     | 9132.0762    | 95.1879  |
| Totals:        |           |             |              | 9593.7414    | 100.0000 |

Spectrum from 20230517.wif2 (sample 94) - 58, +TOF MS (200 - 800) from 0.164 to 0.189 min

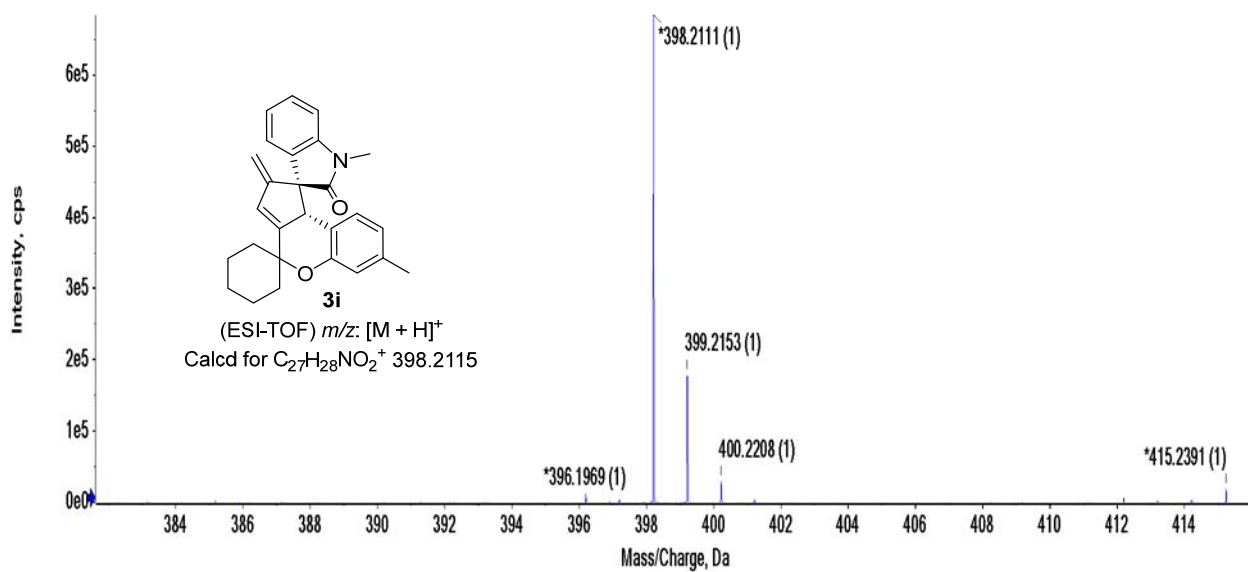

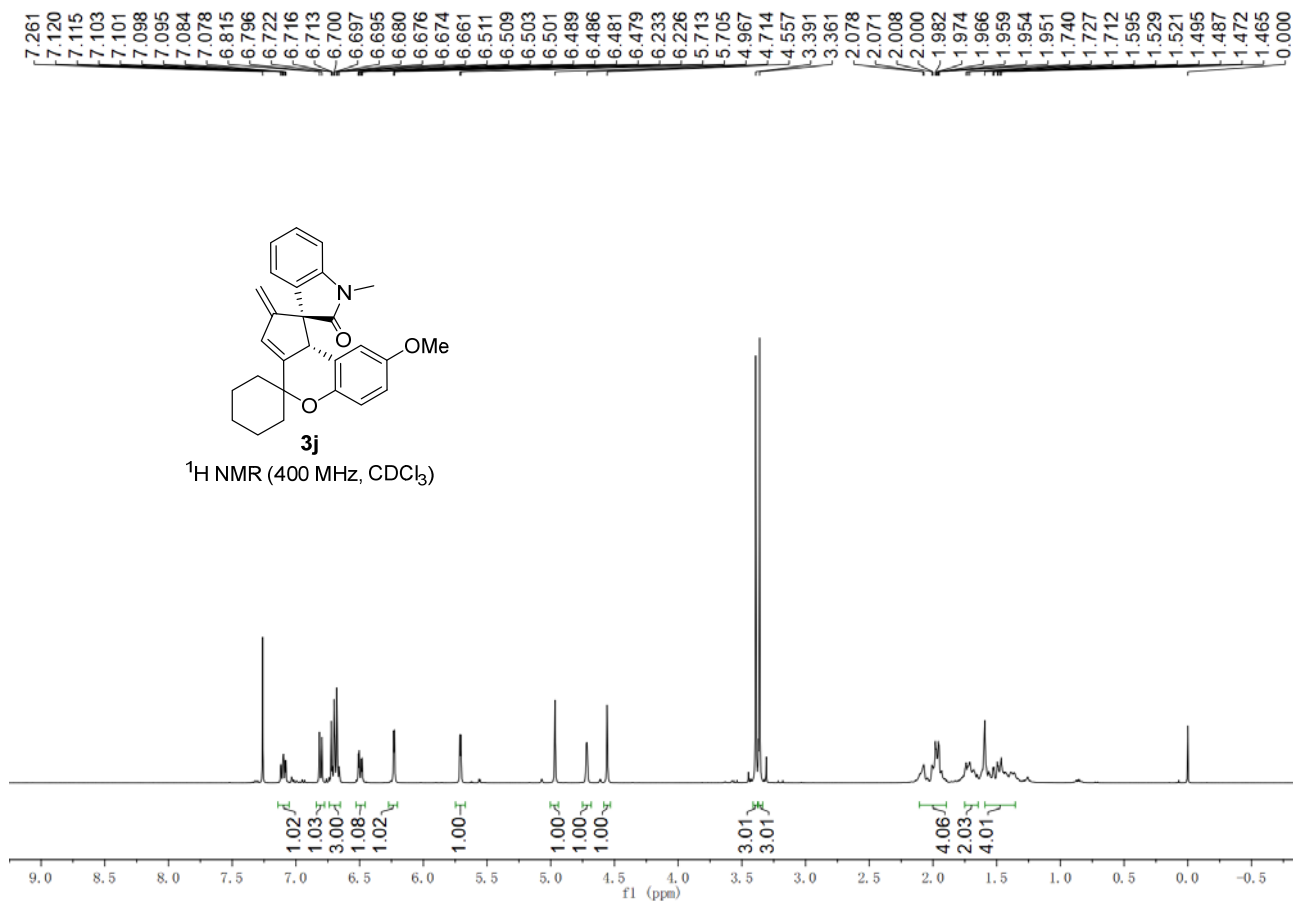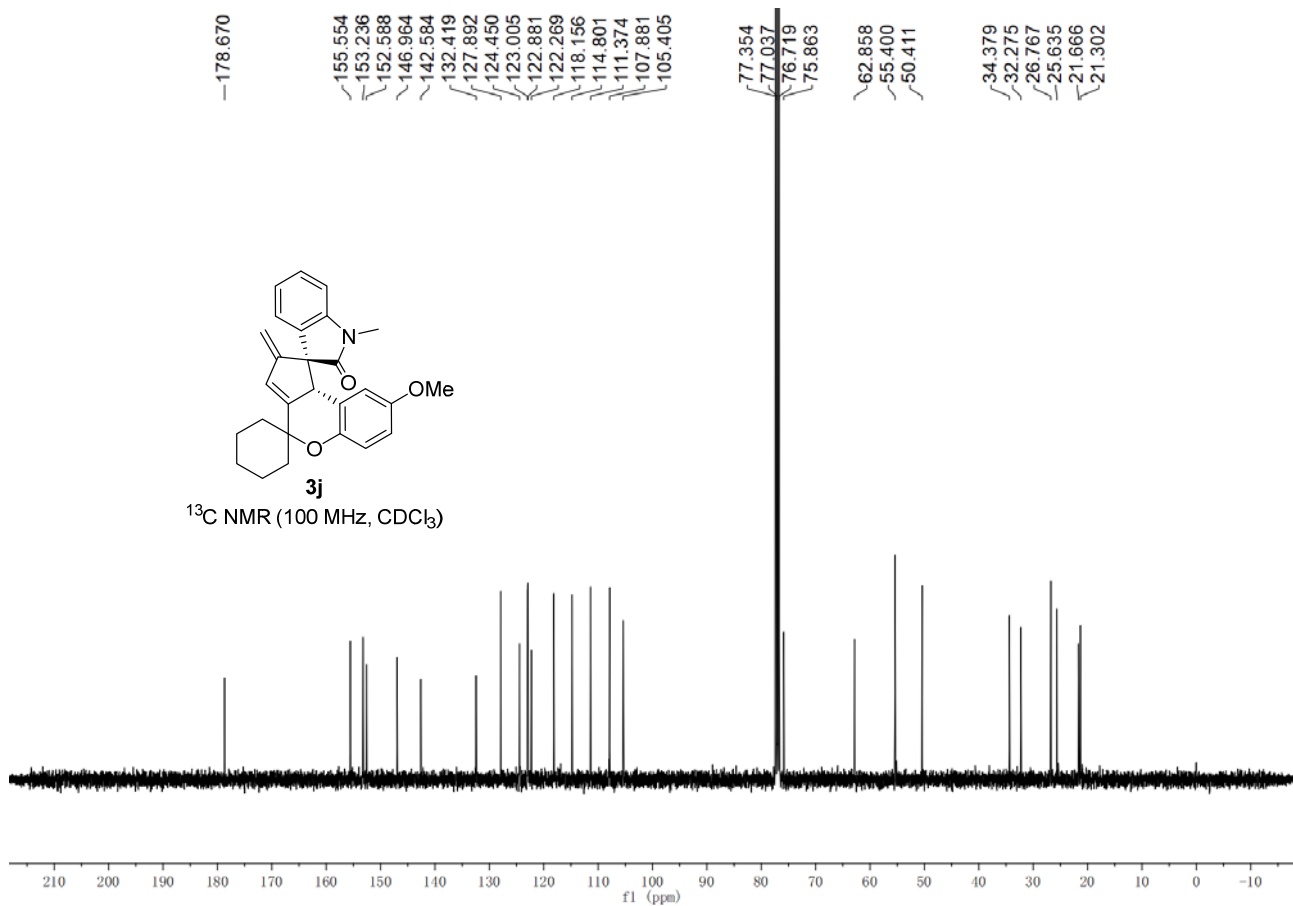

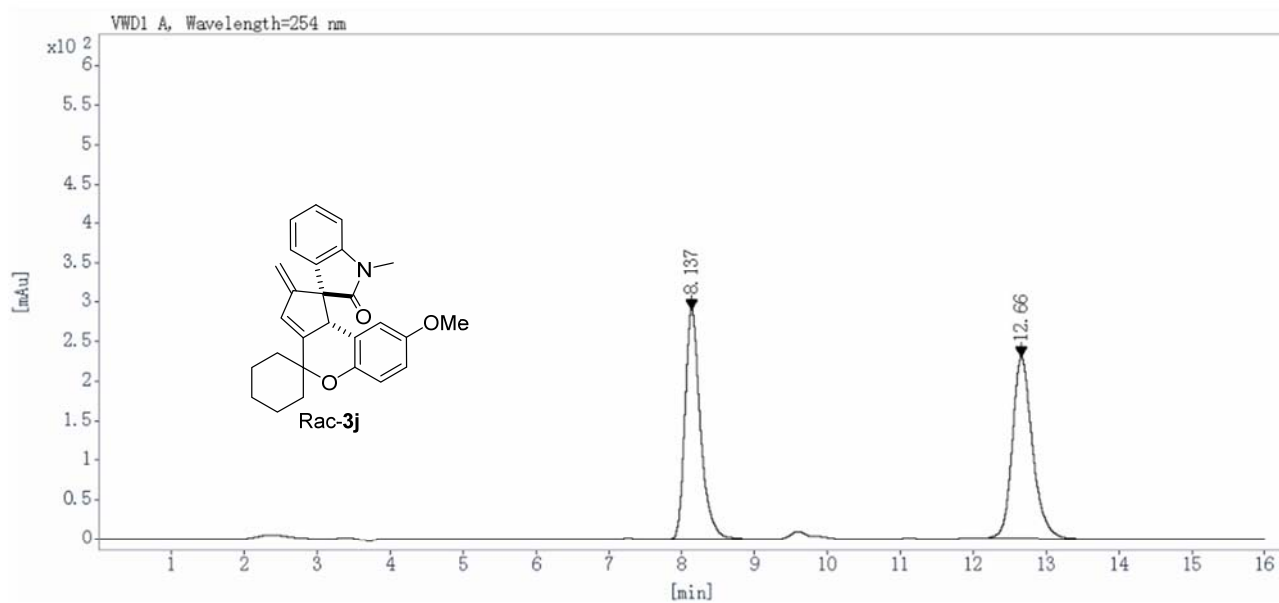

| Ret Time [min] | Peak Type | Width [min] | Height [mAU] | Area [mAU*s] | Area [%] |
|----------------|-----------|-------------|--------------|--------------|----------|
| 8.137          | BBA       | 0.22        | 289.9394     | 4266.7715    | 49.1870  |
| 12.660         | BBA       | 0.29        | 229.3670     | 4407.8218    | 50.8130  |
| Totals:        |           |             |              | 8674.5933    | 100.0000 |

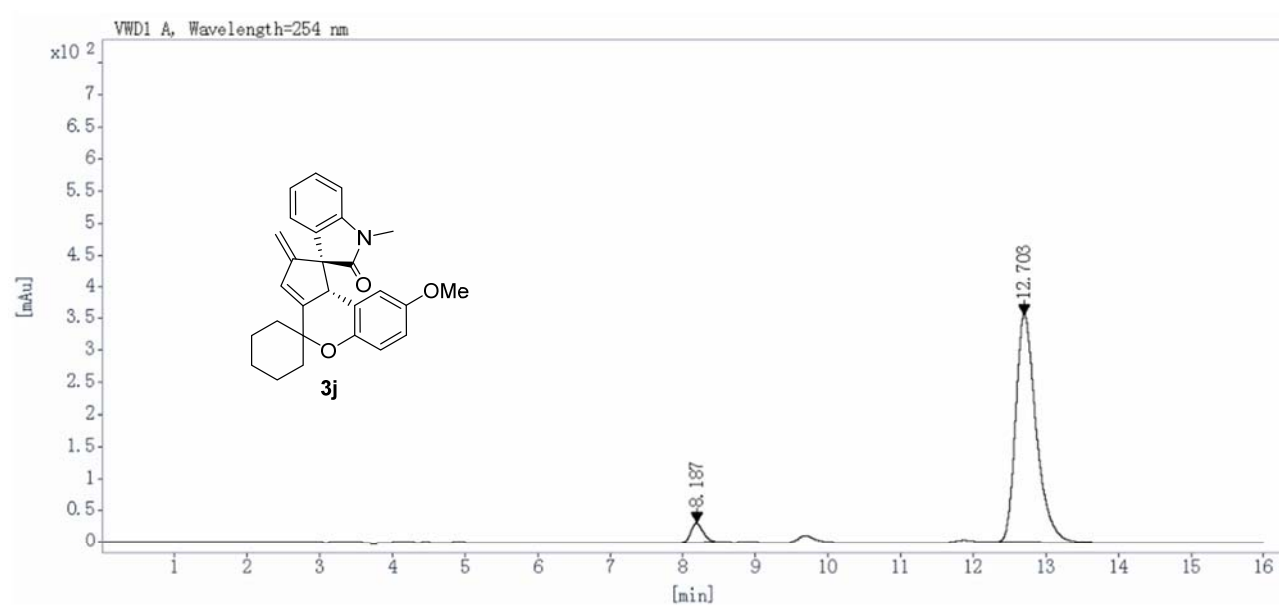

| Ret Time [min] | Peak Type | Width [min] | Height [mAU] | Area [mAU*s] | Area [%] |
|----------------|-----------|-------------|--------------|--------------|----------|
| 8.187          | BBA       | 0.18        | 31.2825      | 376.2105     | 5.0857   |
| 12.703         | BBA       | 0.30        | 356.7078     | 7021.1616    | 94.9143  |
| Totals:        |           |             |              | 7397.3722    | 100.0000 |



Spectrum from 20230517.wiff2 (sample 91) - 55, +TOF MS (200 - 800) from 0.139 to 0.164 min

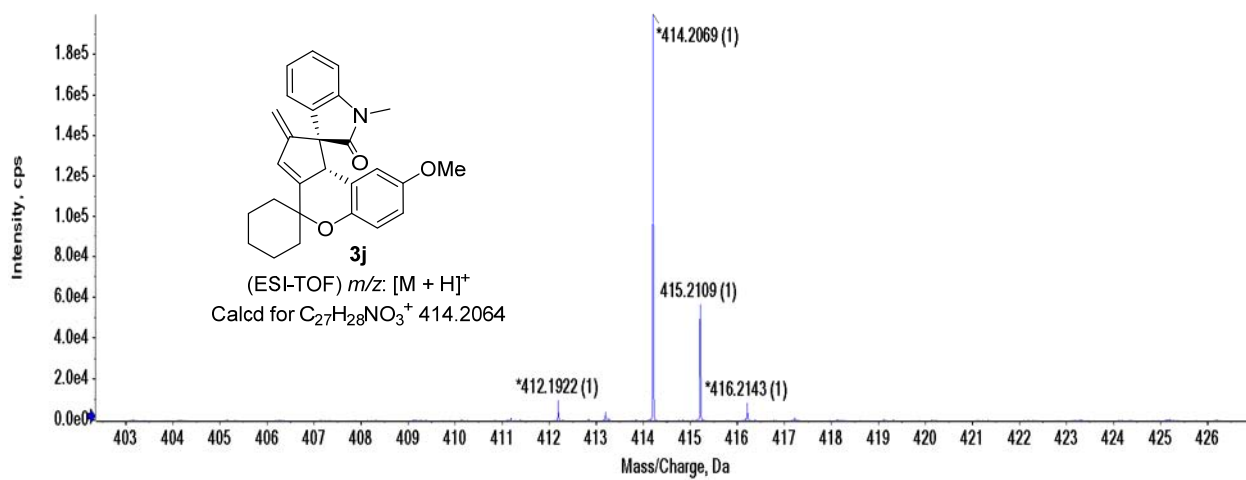

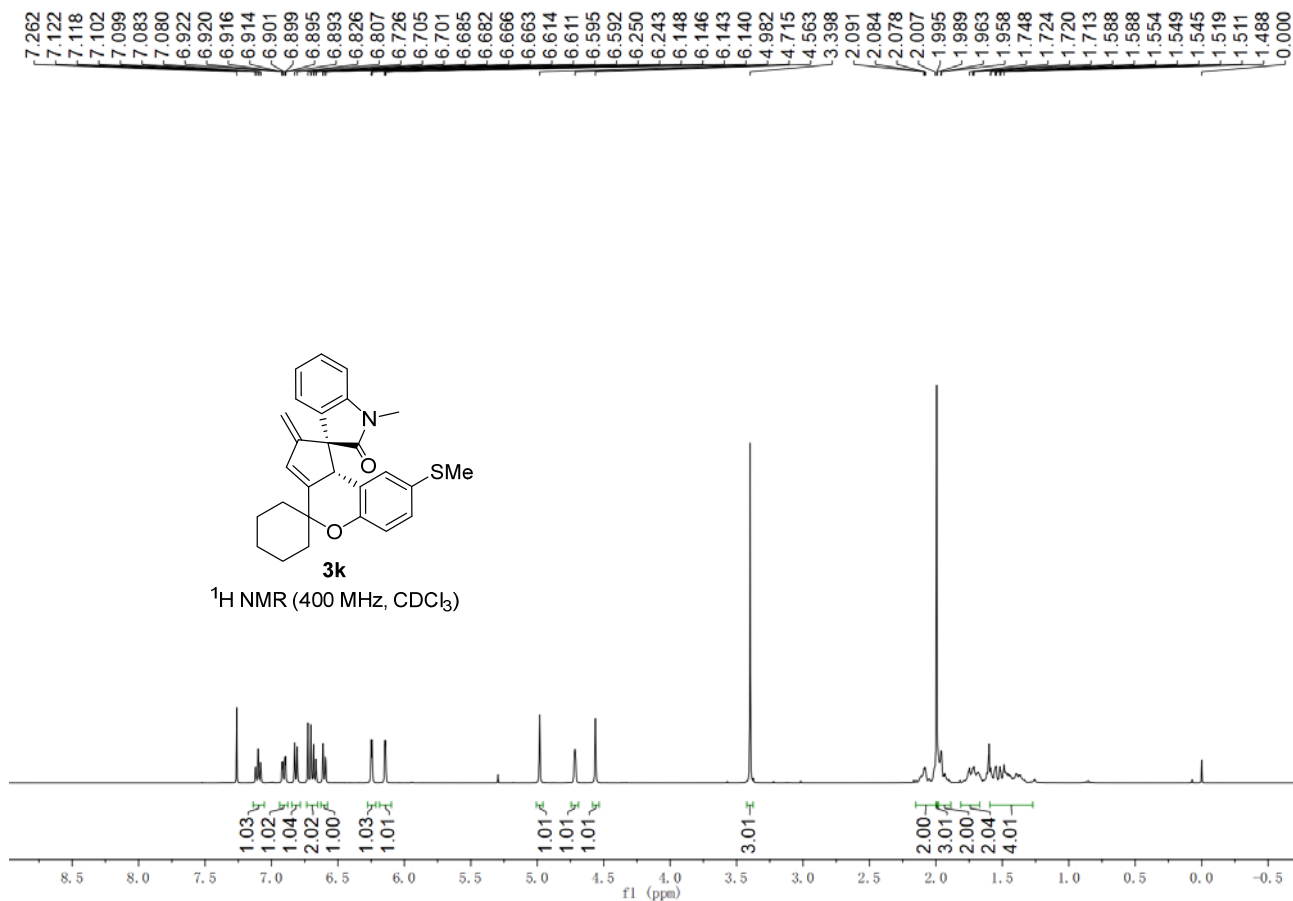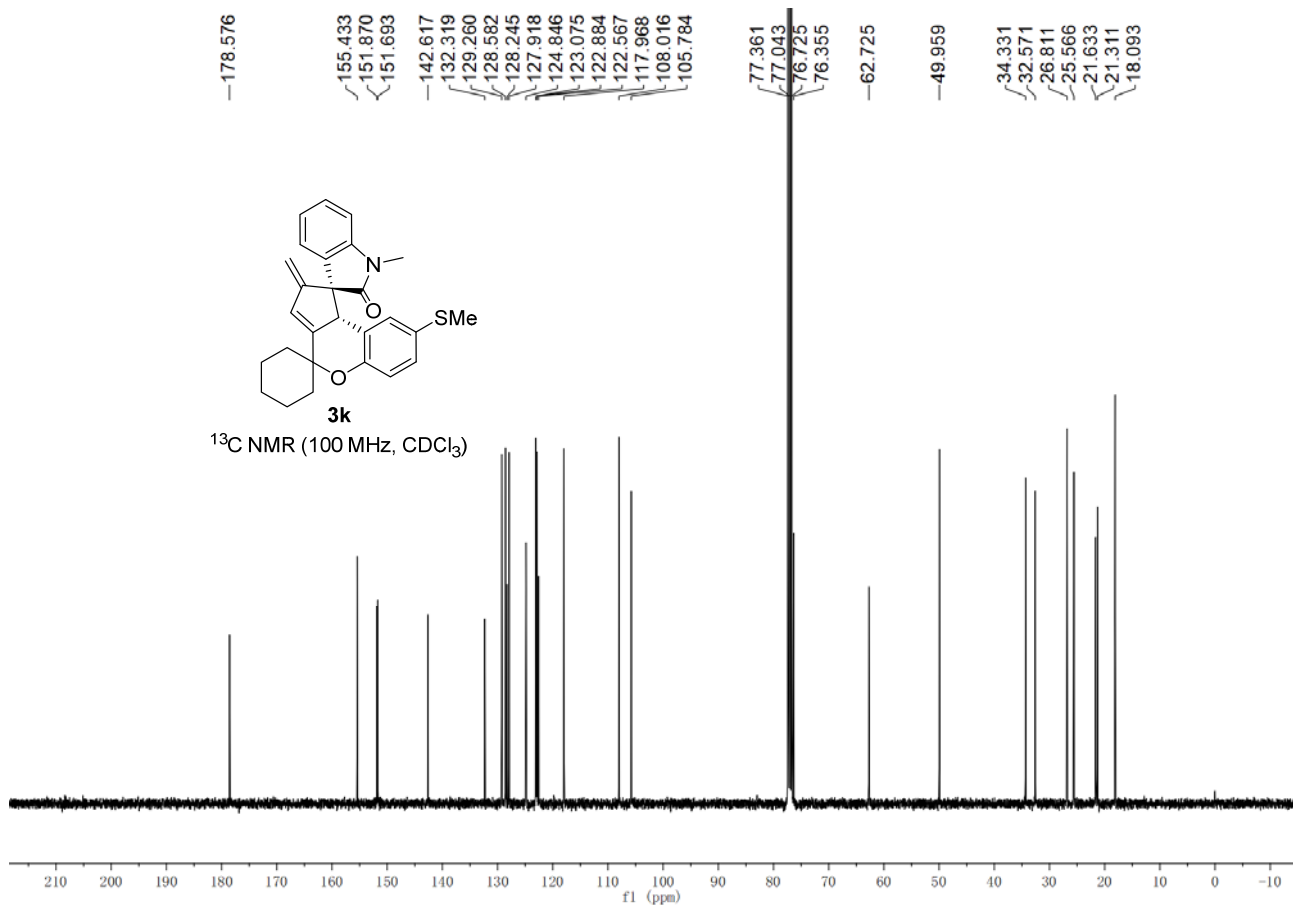

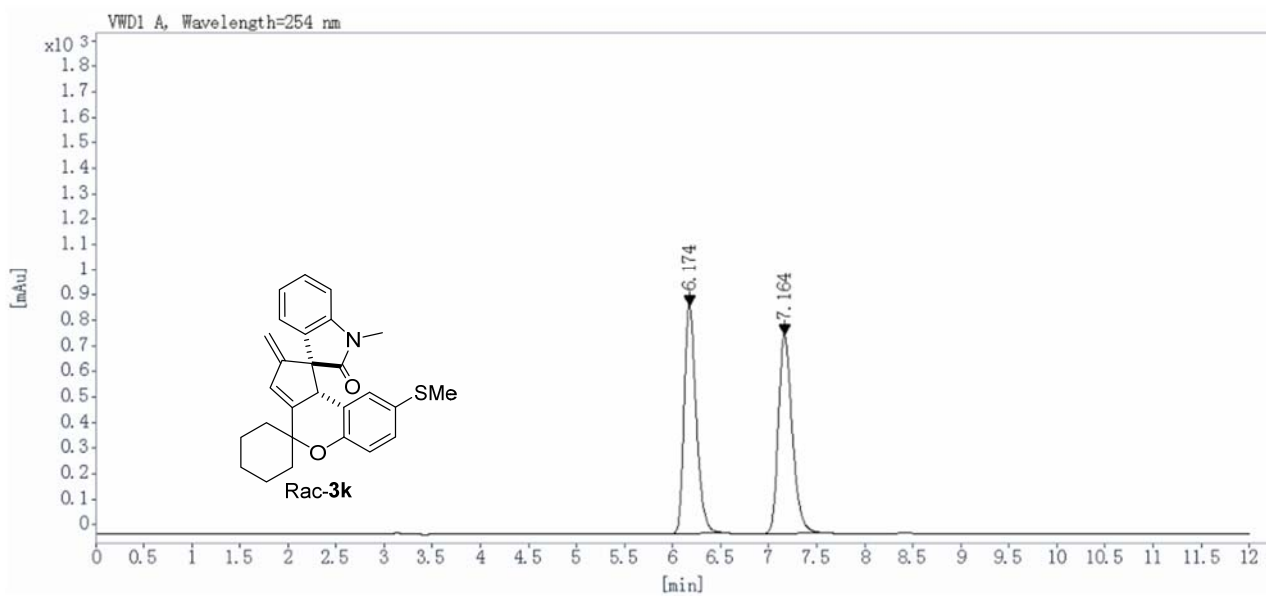

| Ret Time [min] | Peak Type | Width [min] | Height [mAU] | Area [mAU*s] | Area [%] |
|----------------|-----------|-------------|--------------|--------------|----------|
| 6.174          | BBA       | 0.13        | 892.4514     | 7819.1255    | 49.9049  |
| 7.164          | BBA       | 0.15        | 777.7509     | 7848.9243    | 50.0951  |
| Totals:        |           |             |              | 15668.0498   | 100.0000 |

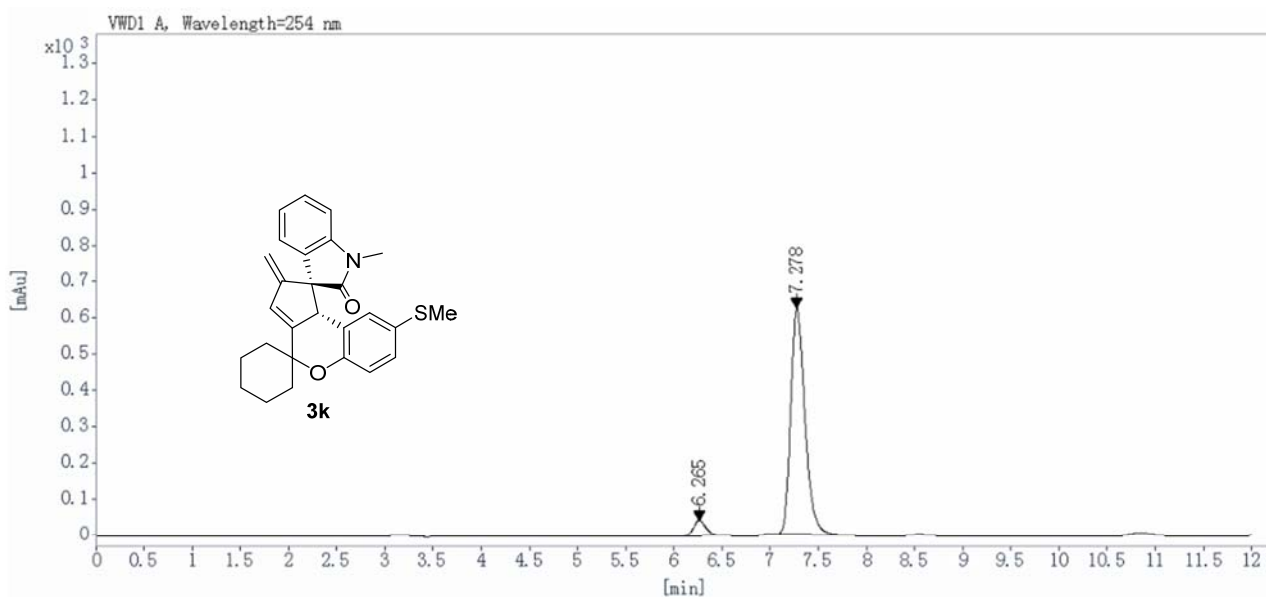

| Ret Time [min] | Peak Type | Width [min] | Height [mAU] | Area [mAU*s] | Area [%] |
|----------------|-----------|-------------|--------------|--------------|----------|
| 6.265          | BBA       | 0.14        | 42.4012      | 373.2176     | 5.4791   |
| 7.278          | BBA       | 0.16        | 623.3853     | 6438.4448    | 94.5209  |
| Totals:        |           |             |              | 6811.6624    | 100.0000 |

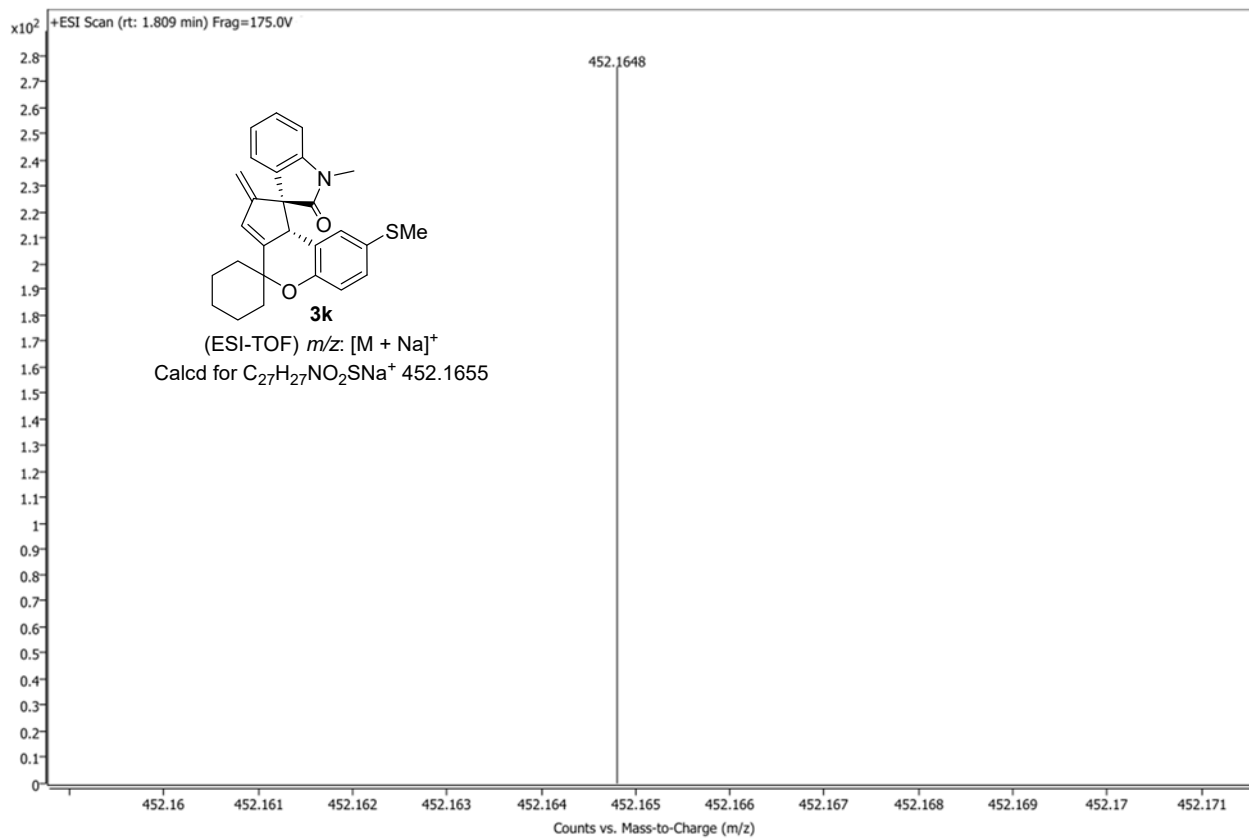

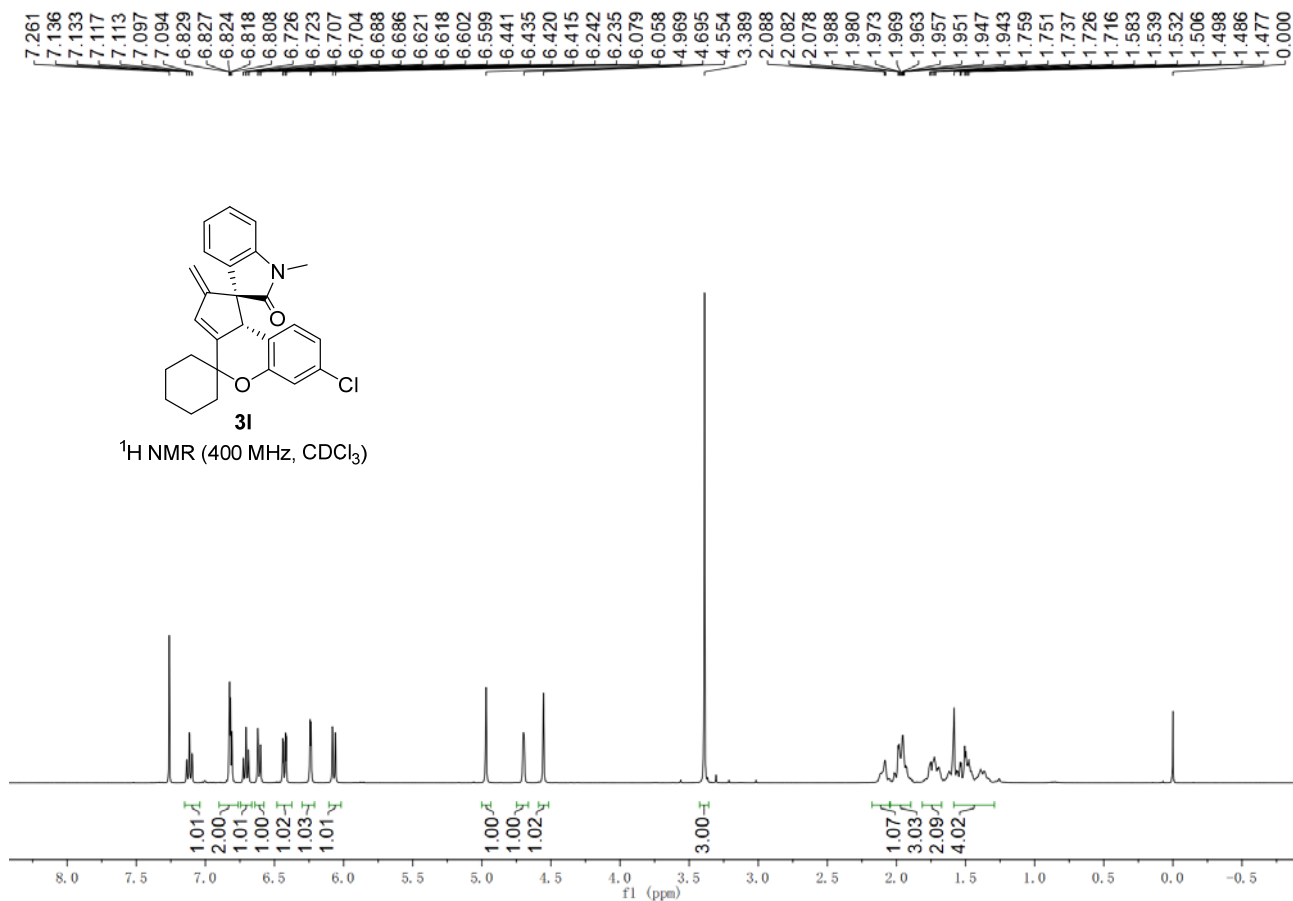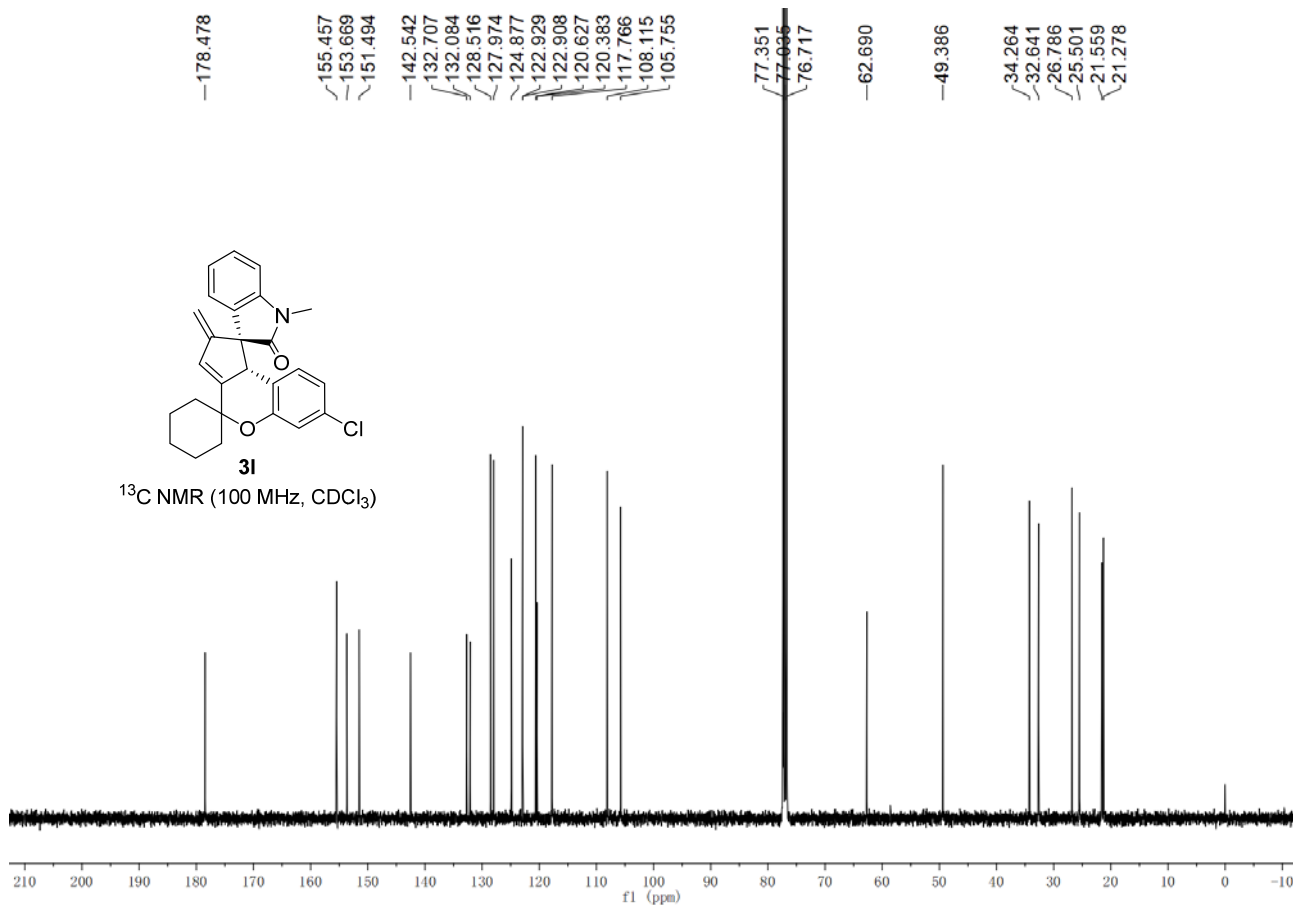

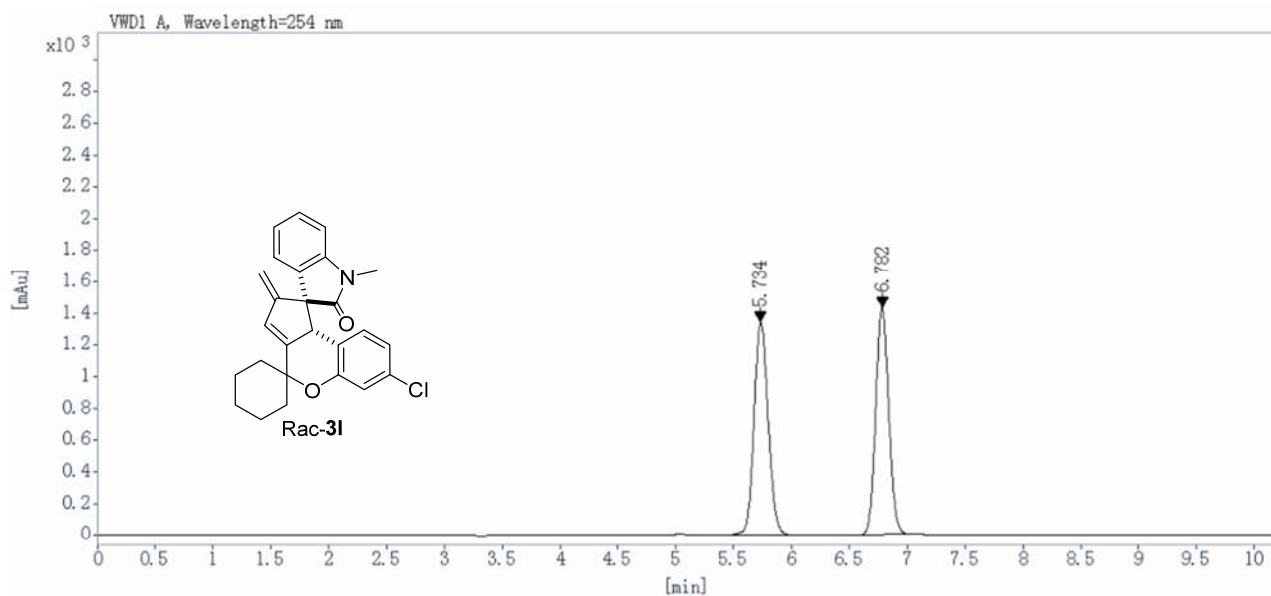

| Ret Time [min] | Peak Type | Width [min] | Height [mAU] | Area [mAU*s] | Area [%] |
|----------------|-----------|-------------|--------------|--------------|----------|
| 5.734          | BBA       | 0.13        | 1342.9154    | 11408.9932   | 50.4141  |
| 6.782          | BB        | 0.12        | 1436.9625    | 11221.5811   | 49.5859  |
| Totals:        |           |             |              | 22630.5742   | 100.0000 |

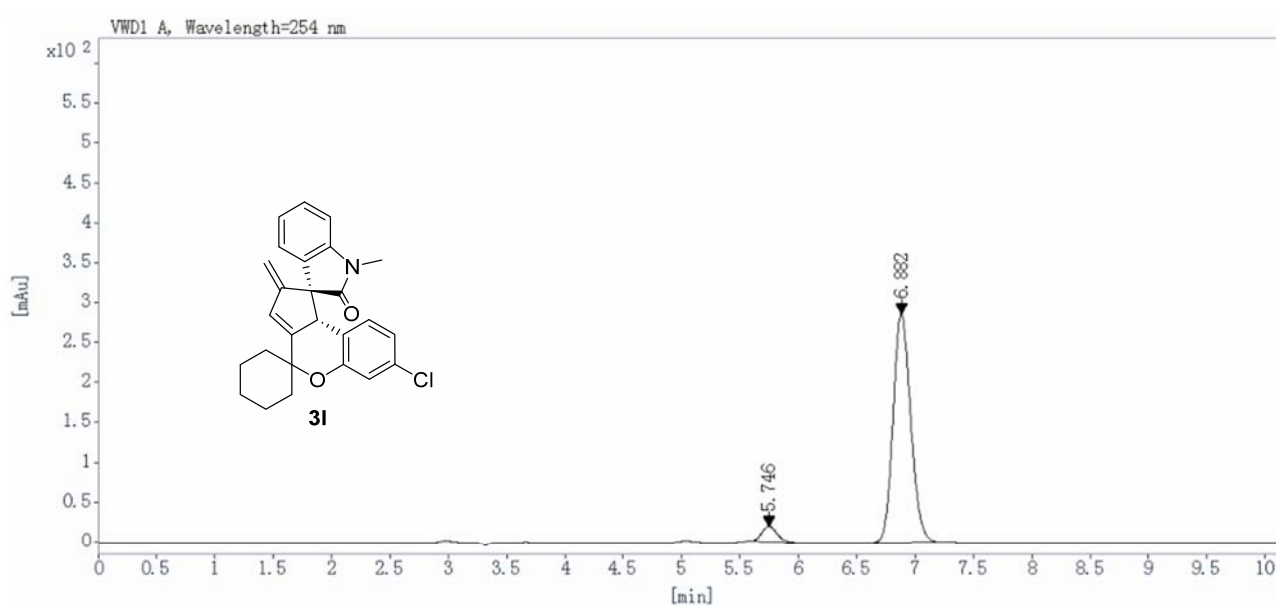

| Ret Time [min] | Peak Type | Width [min] | Height [mAU] | Area [mAU*s] | Area [%] |
|----------------|-----------|-------------|--------------|--------------|----------|
| 5.746          | BBA       | 0.14        | 19.8359      | 184.5714     | 5.7821   |
| 6.882          | BBA       | 0.16        | 285.8464     | 3007.5542    | 94.2179  |
| Totals:        |           |             |              | 3192.1256    | 100.0000 |

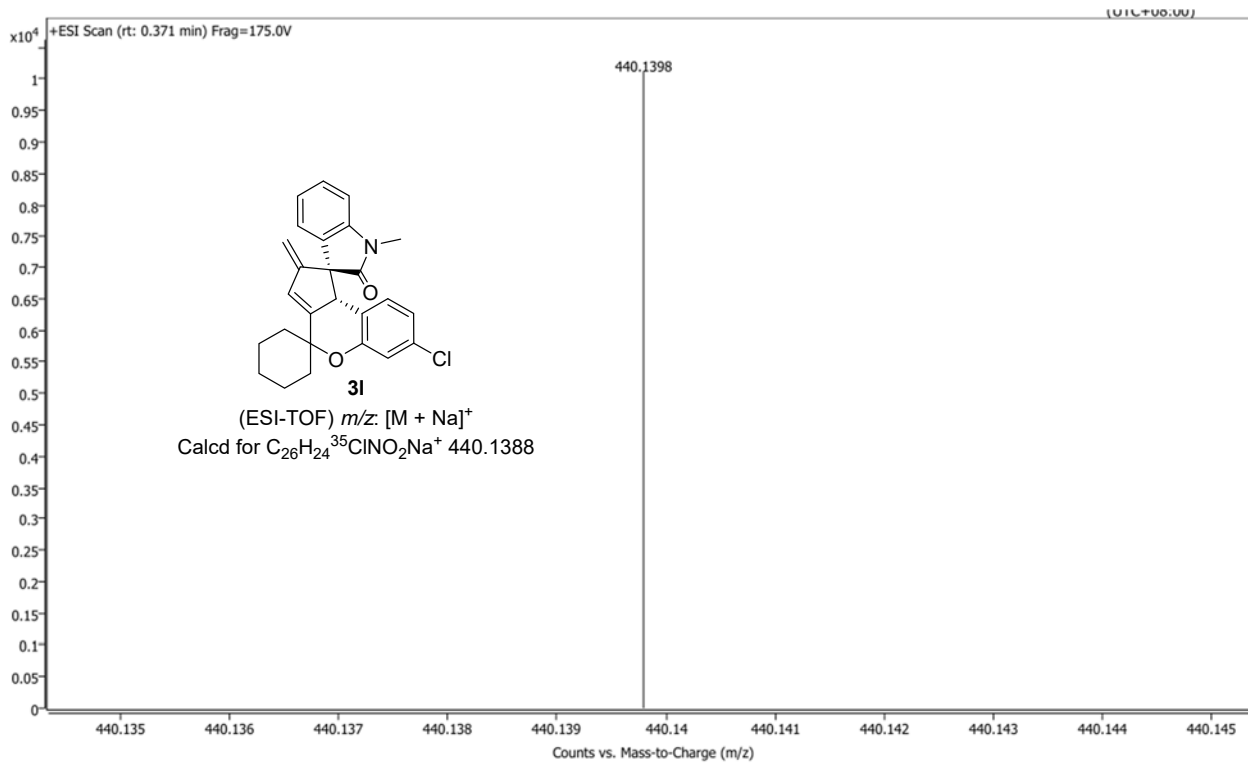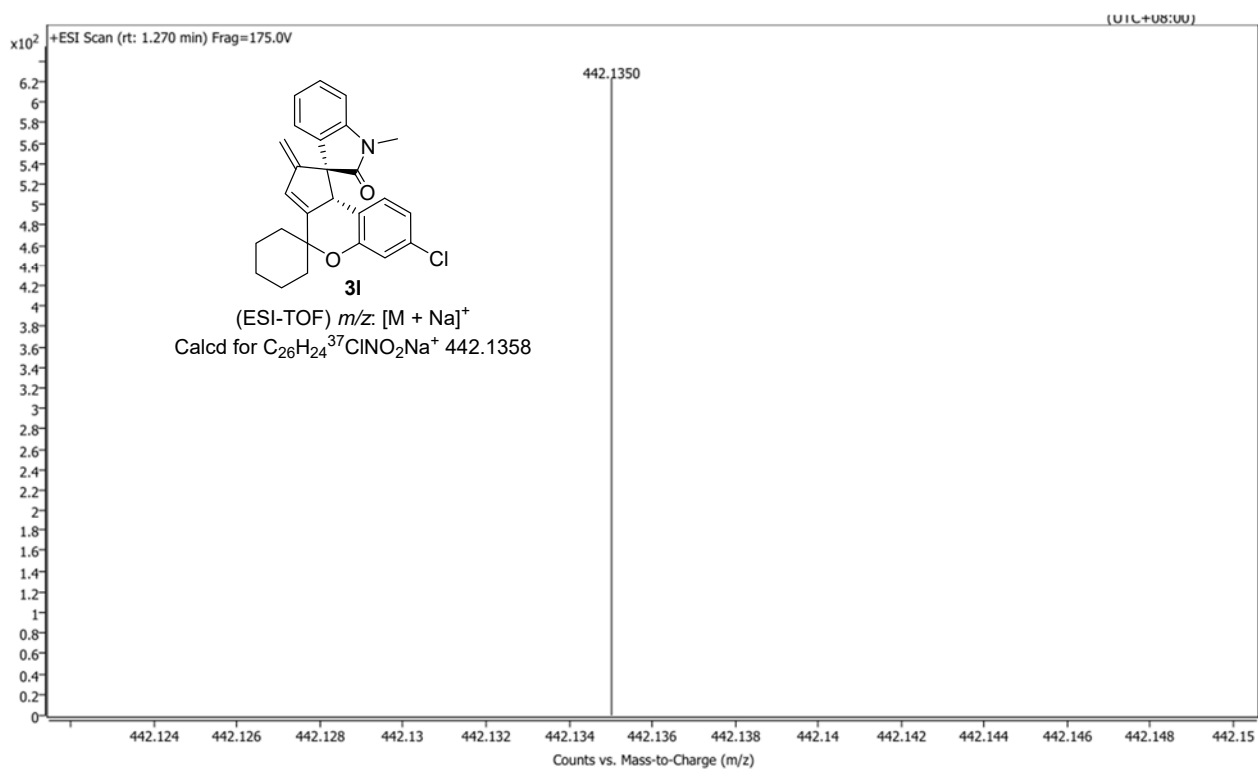

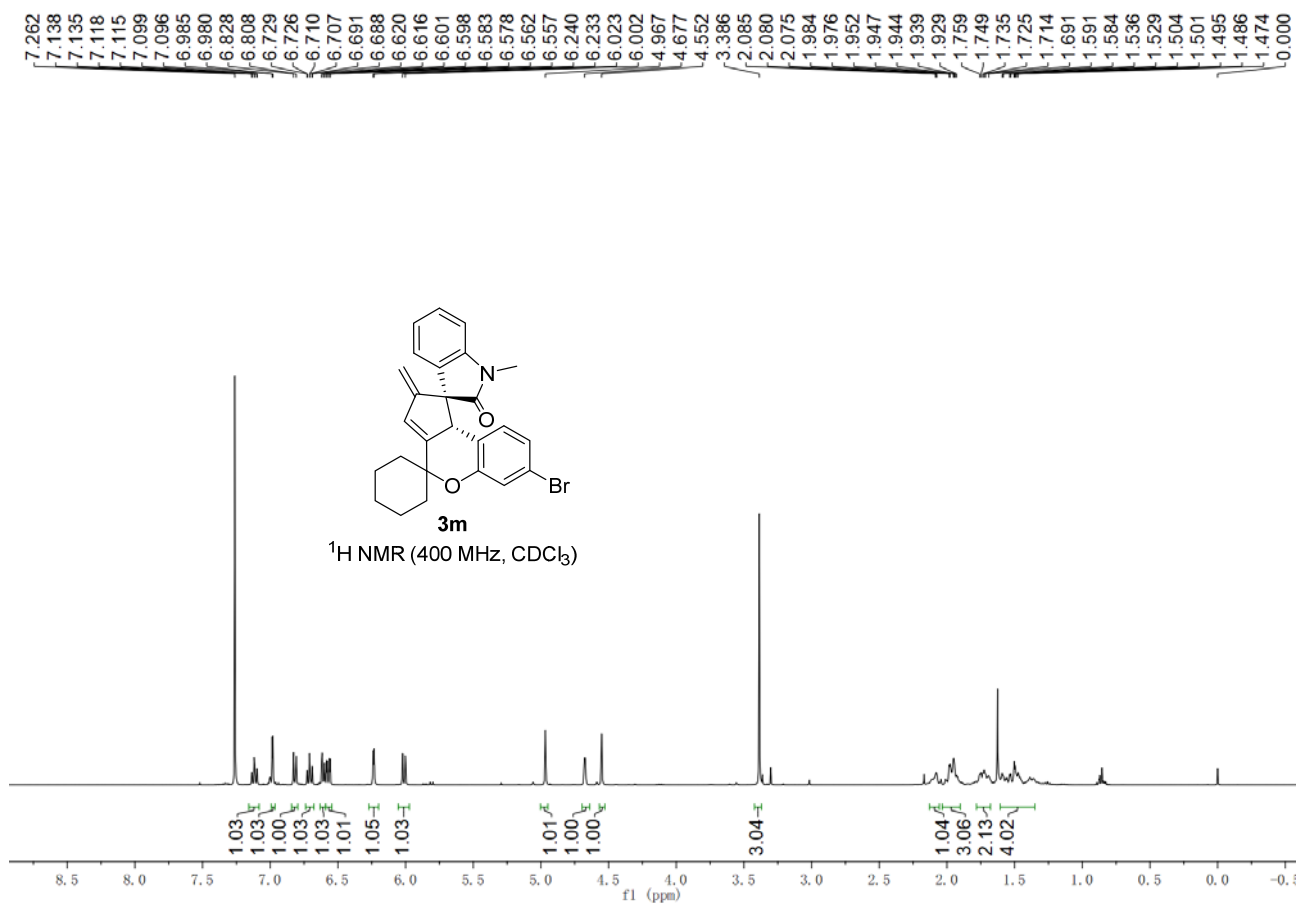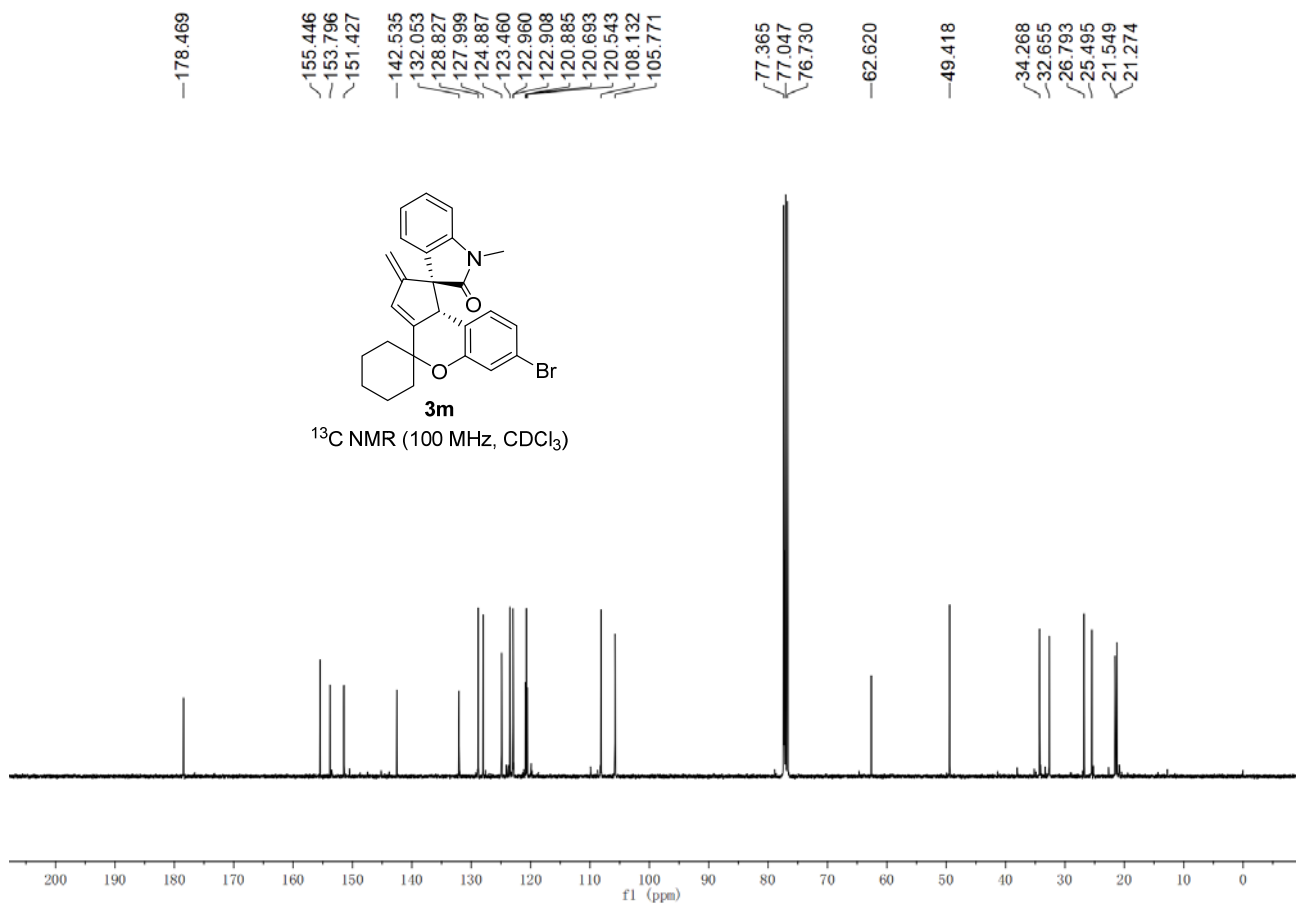



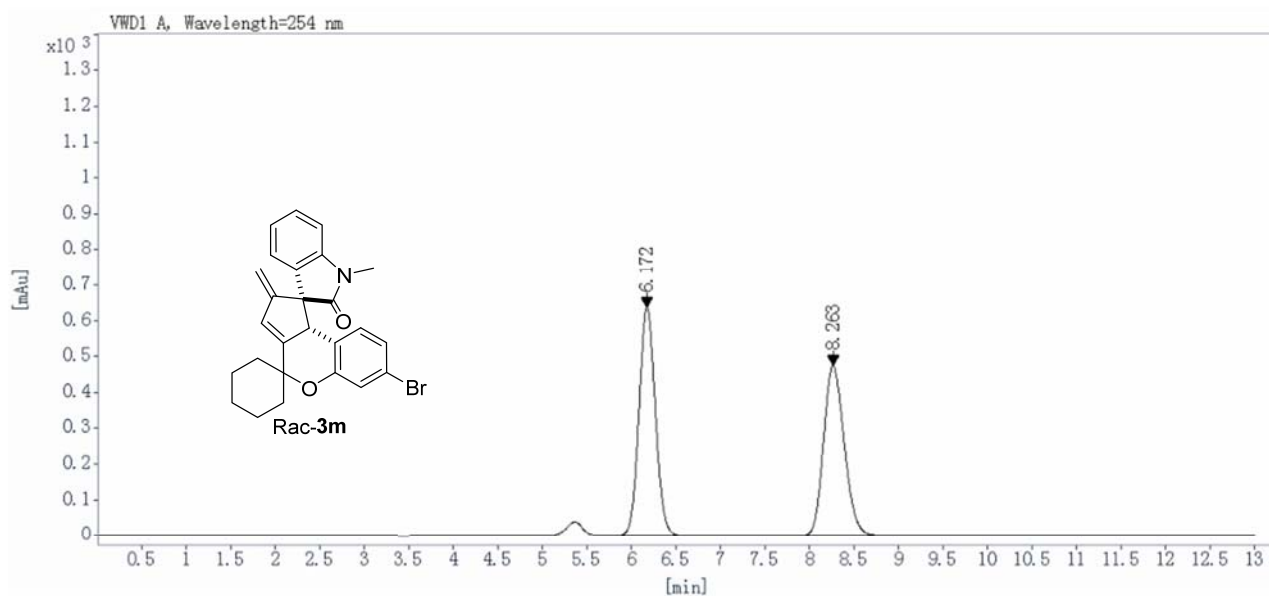

| Ret Time [min] | Peak Type | Width [min] | Height [mAU] | Area [mAU*s] | Area [%] |
|----------------|-----------|-------------|--------------|--------------|----------|
| 6.172          | BBA       | 0.20        | 636.8077     | 8103.1338    | 51.3770  |
| 8.263          | BB        | 0.25        | 474.3646     | 7668.7861    | 48.6230  |
| Totals:        |           |             |              | 15771.9199   | 100.0000 |

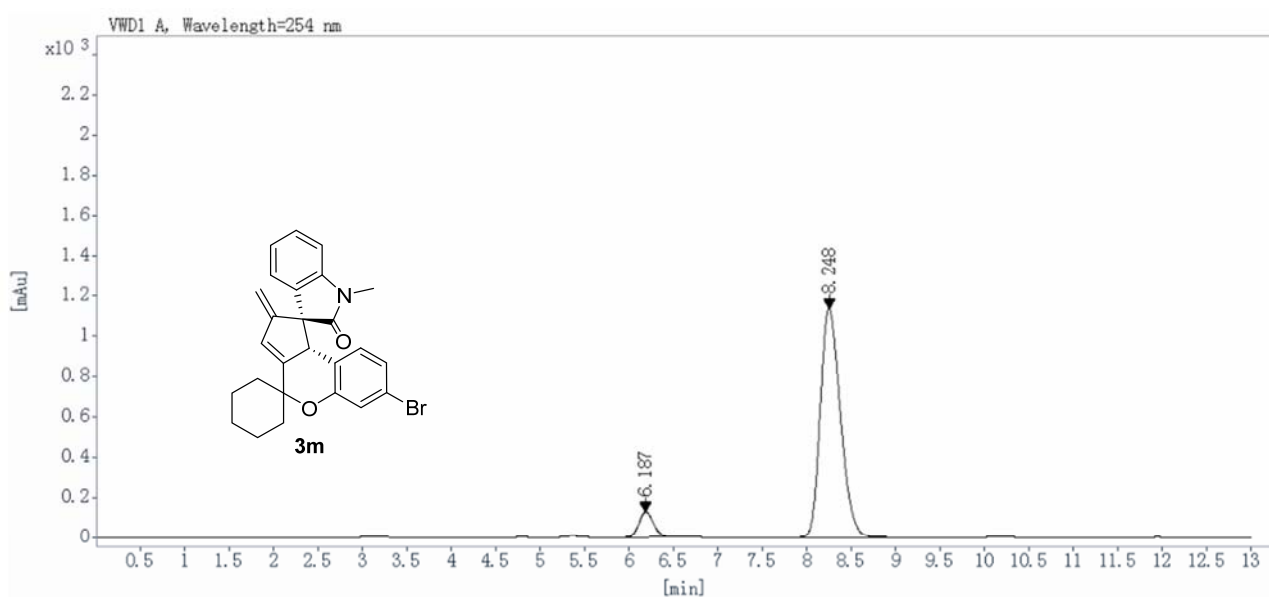

| Ret Time [min] | Peak Type | Width [min] | Height [mAU] | Area [mAU*s] | Area [%] |
|----------------|-----------|-------------|--------------|--------------|----------|
| 6.187          | BB        | 0.17        | 126.9802     | 1423.3439    | 7.4052   |
| 8.248          | BBA       | 0.24        | 1134.6816    | 17797.6406   | 92.5948  |
| Totals:        |           |             |              | 19220.9845   | 100.0000 |

Spectrum from 20230705.wif2 (sample 75) - 70, +TOF MS (100 - 600) from 0.053 to 0.114 min, noise filtered (noise multiplier = 1.5), Gaussian smoothed (0.5 points), centroided

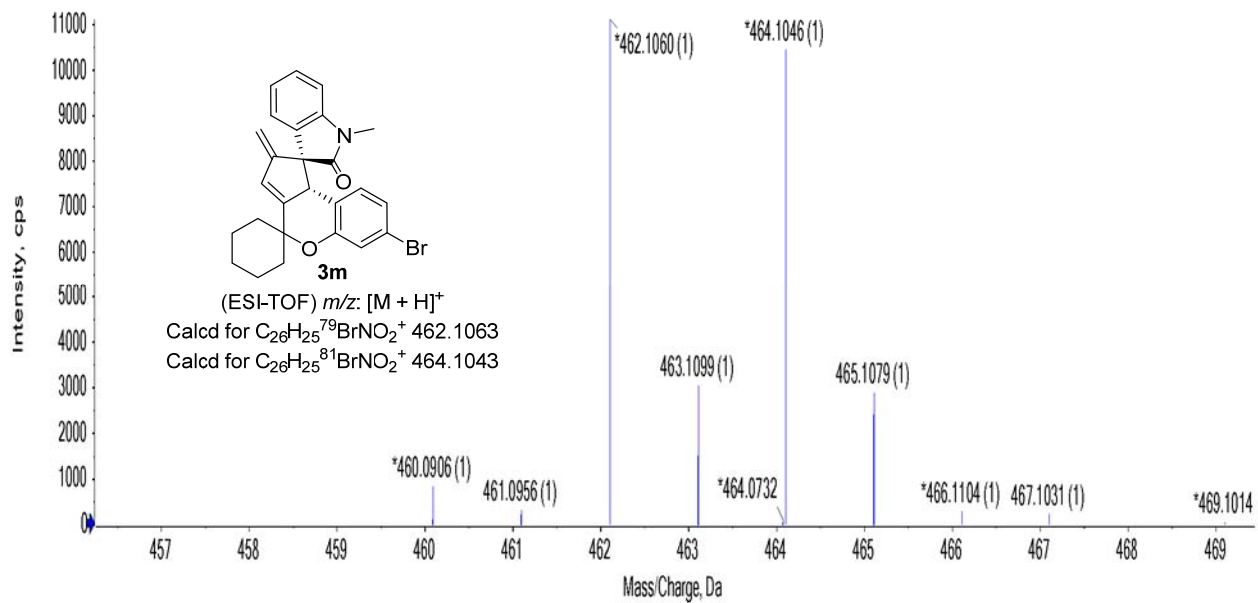

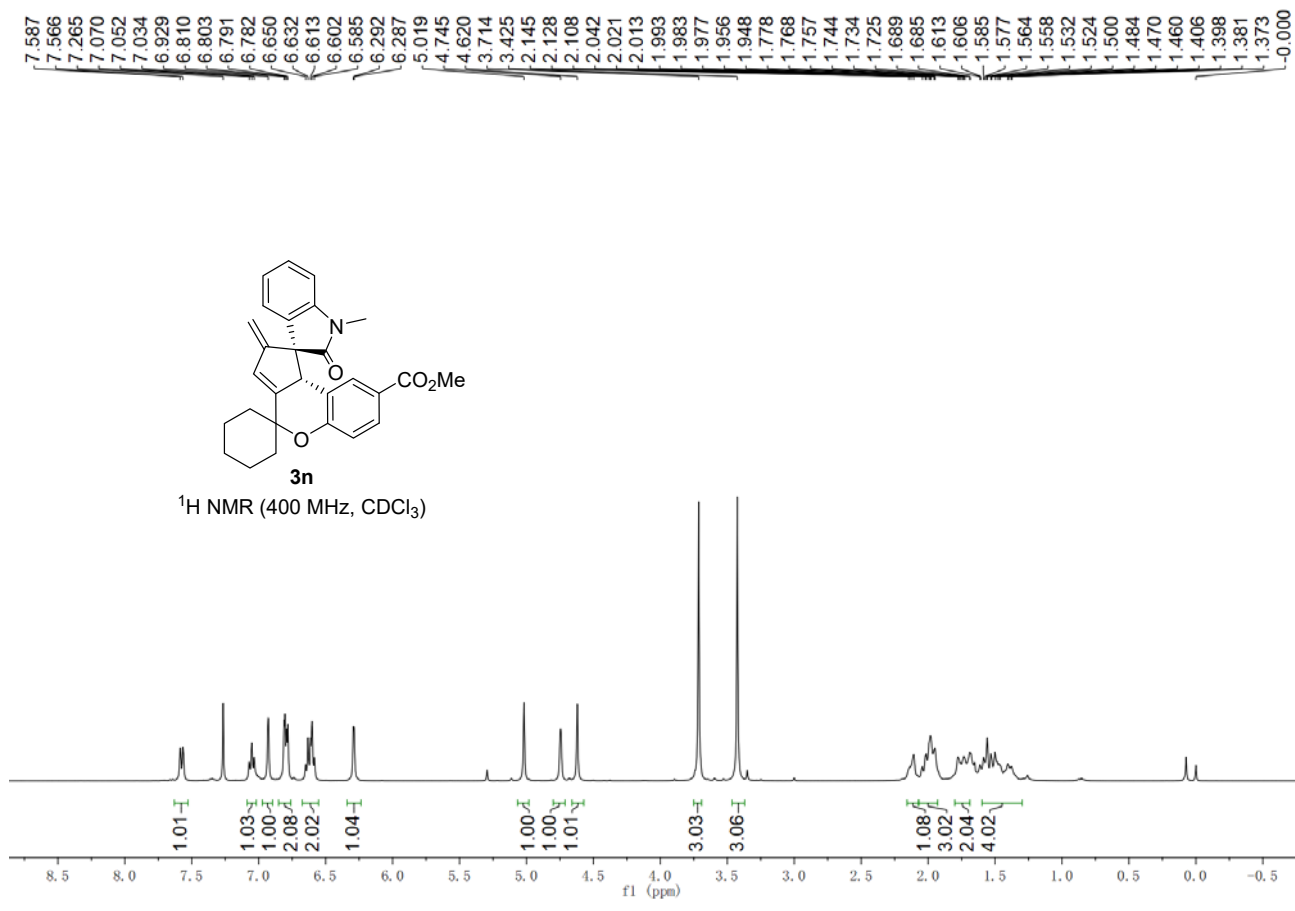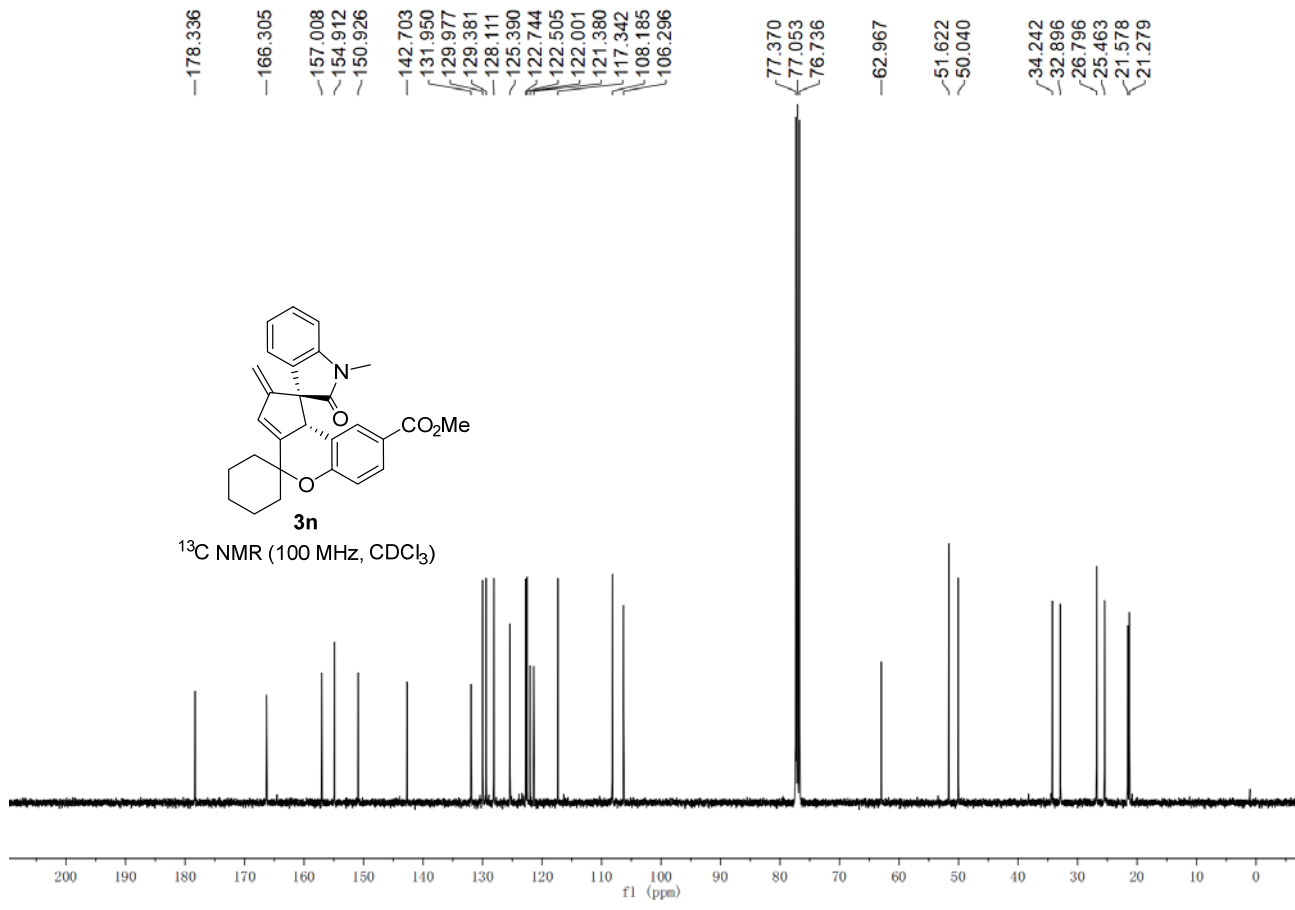

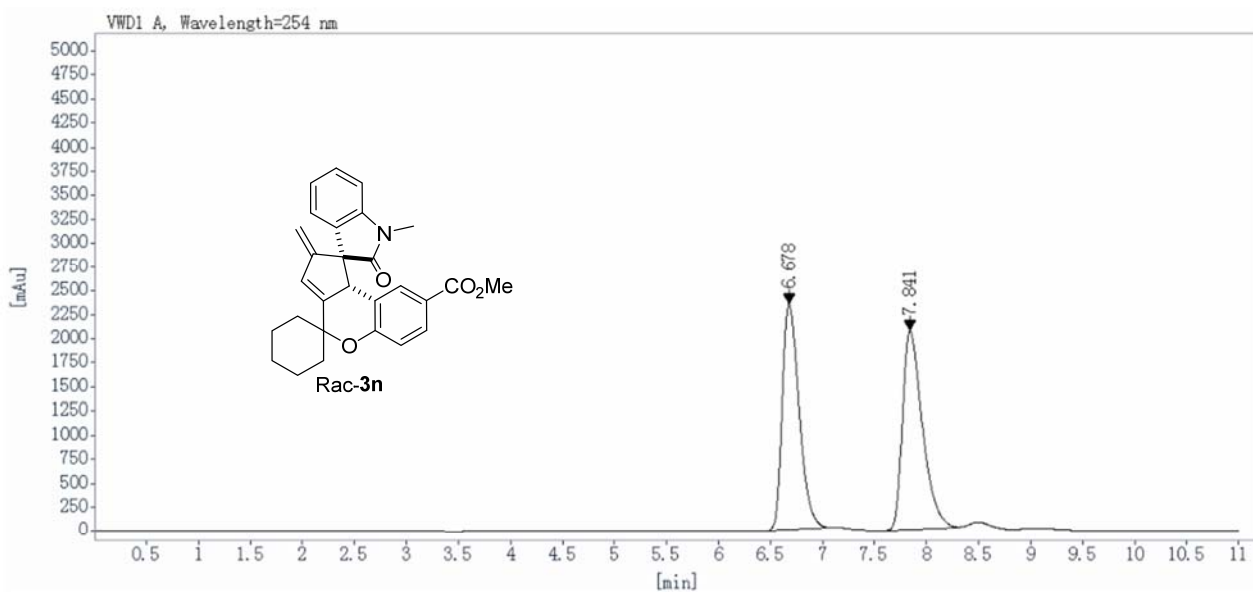

| Ret Time [min] | Peak Type | Width [min] | Height [mAU] | Area [mAU*s] | Area [%] |
|----------------|-----------|-------------|--------------|--------------|----------|
| 6.678          | BB        | 0.17        | 2350.3589    | 26511.5176   | 49.0665  |
| 7.841          | BB        | 0.20        | 2061.8716    | 27520.2773   | 50.9335  |
| Totals:        |           |             |              | 54031.7949   | 100.0000 |

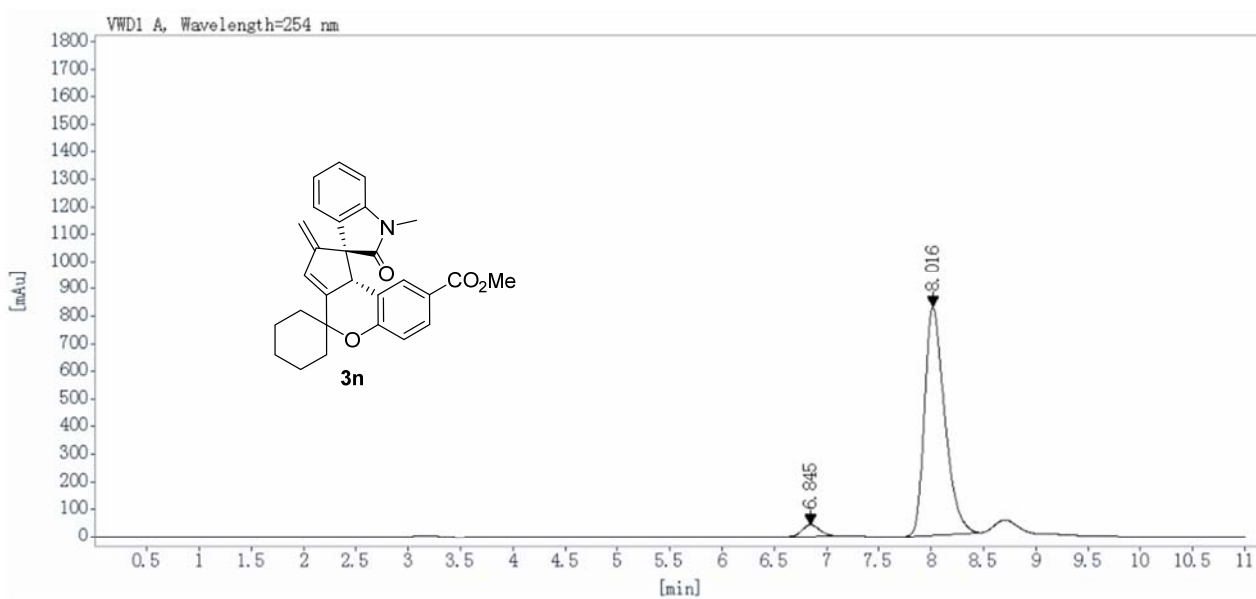

| Ret Time [min] | Peak Type | Width [min] | Height [mAU] | Area [mAU*s] | Area [%] |
|----------------|-----------|-------------|--------------|--------------|----------|
| 6.845          | BBA       | 0.18        | 42.4669      | 508.9646     | 4.3805   |
| 8.016          | BB        | 0.21        | 825.9418     | 11109.8457   | 95.6195  |
| Totals:        |           |             |              | 11618.8103   | 100.0000 |

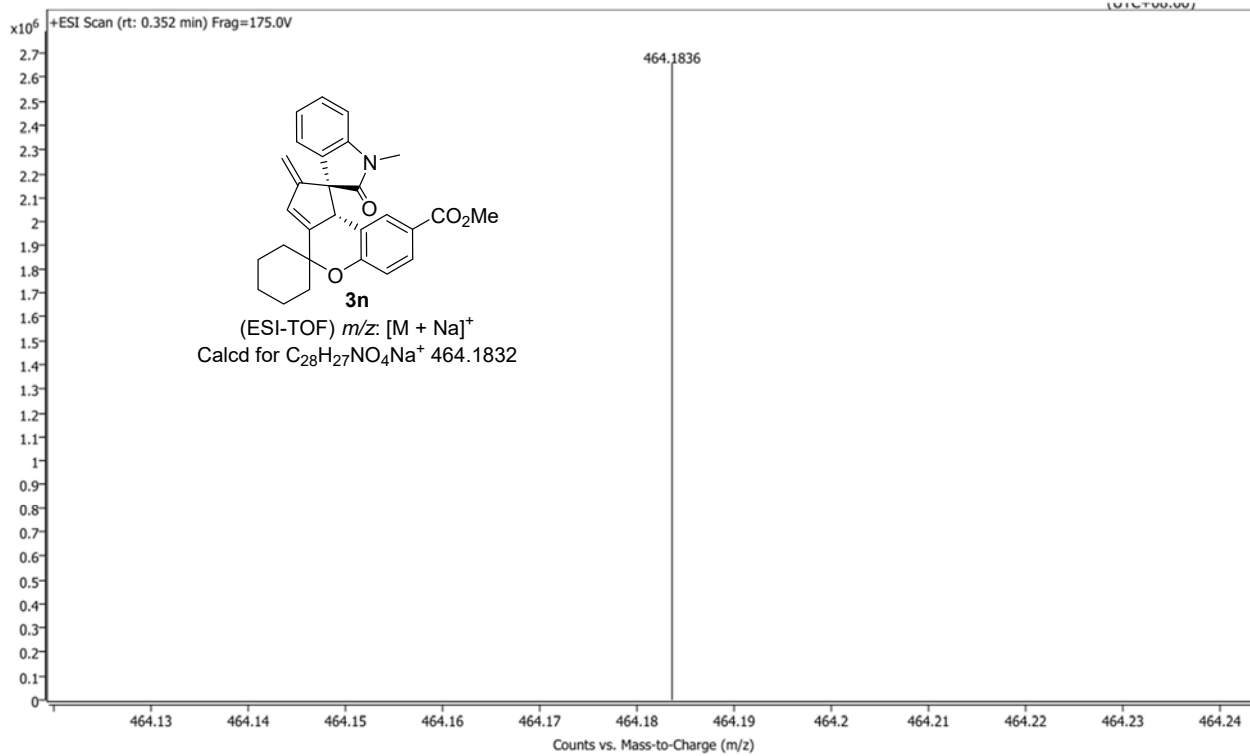

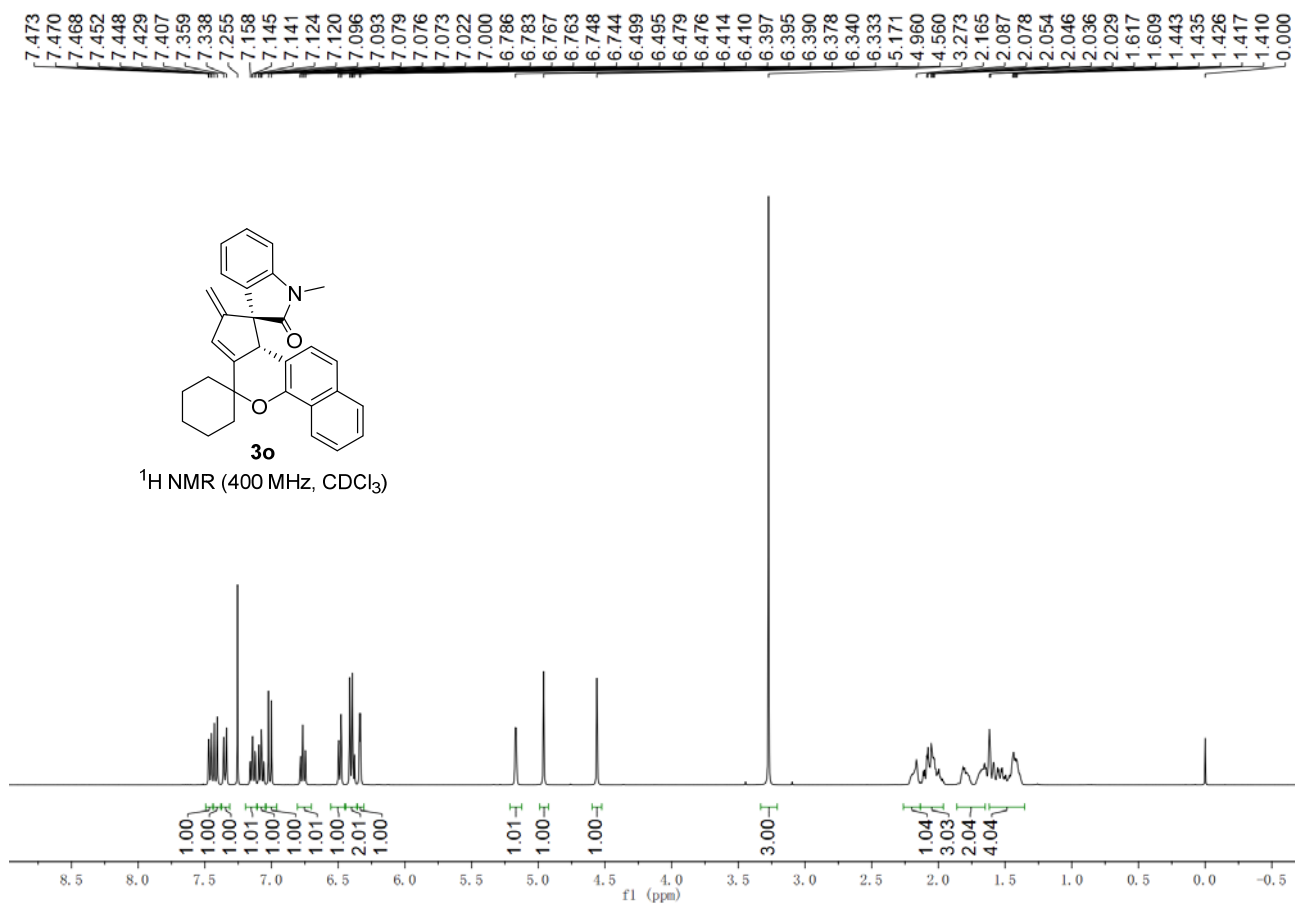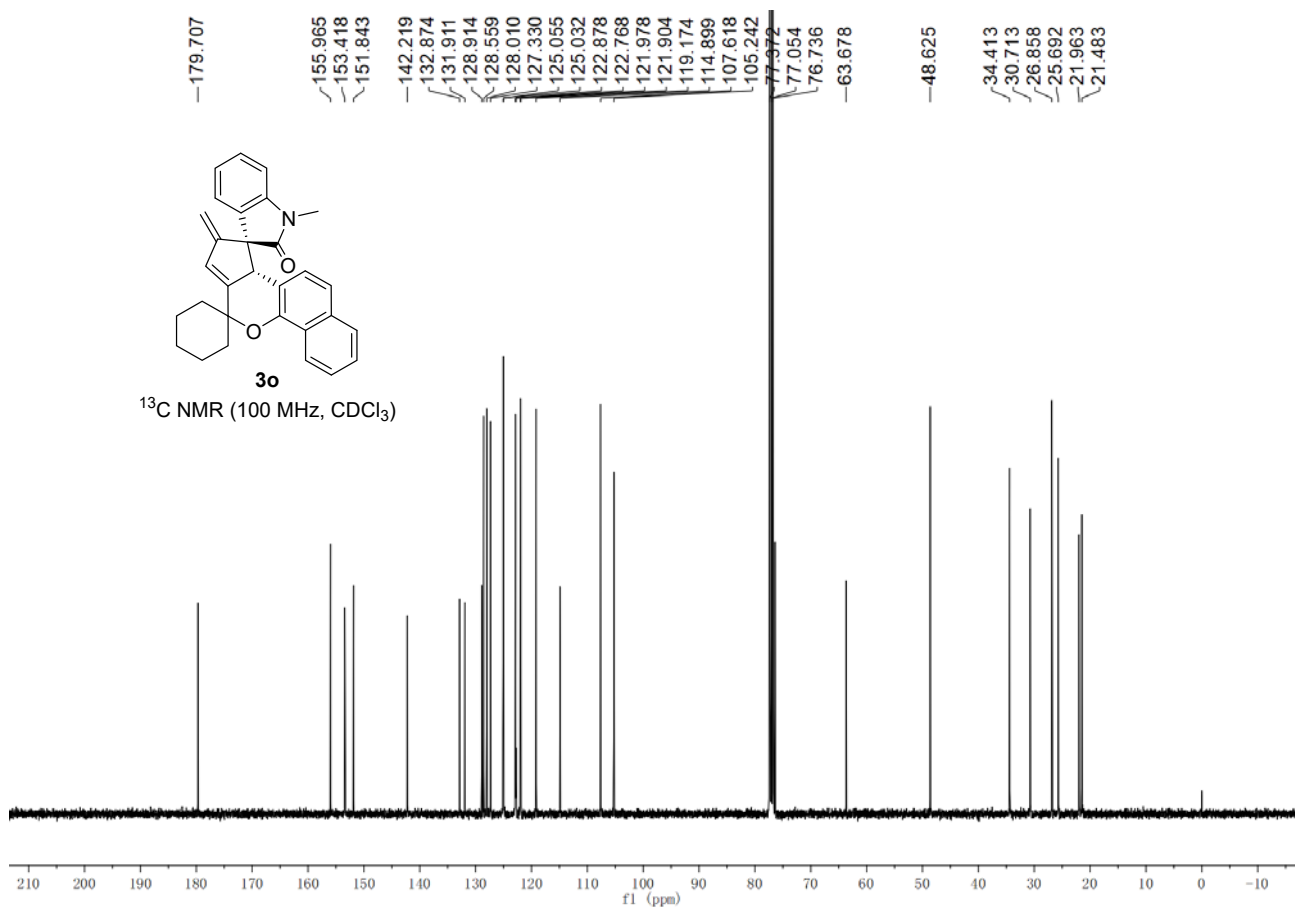

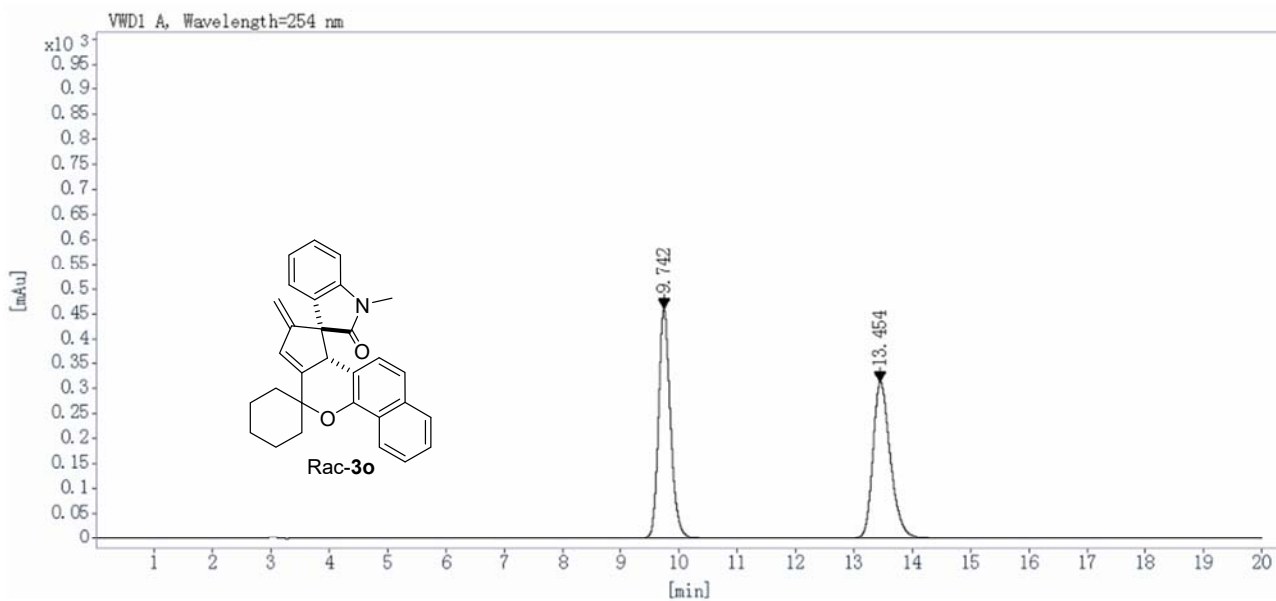

| Ret Time [min] | Peak Type | Width [min] | Height [mAU] | Area [mAU*s] | Area [%] |
|----------------|-----------|-------------|--------------|--------------|----------|
| 9.742          | BBA       | 0.22        | 460.1235     | 6490.4111    | 49.9937  |
| 13.454         | BBA       | 0.32        | 313.6683     | 6492.0356    | 50.0063  |
| Totals:        |           |             |              | 12982.4468   | 100.0000 |

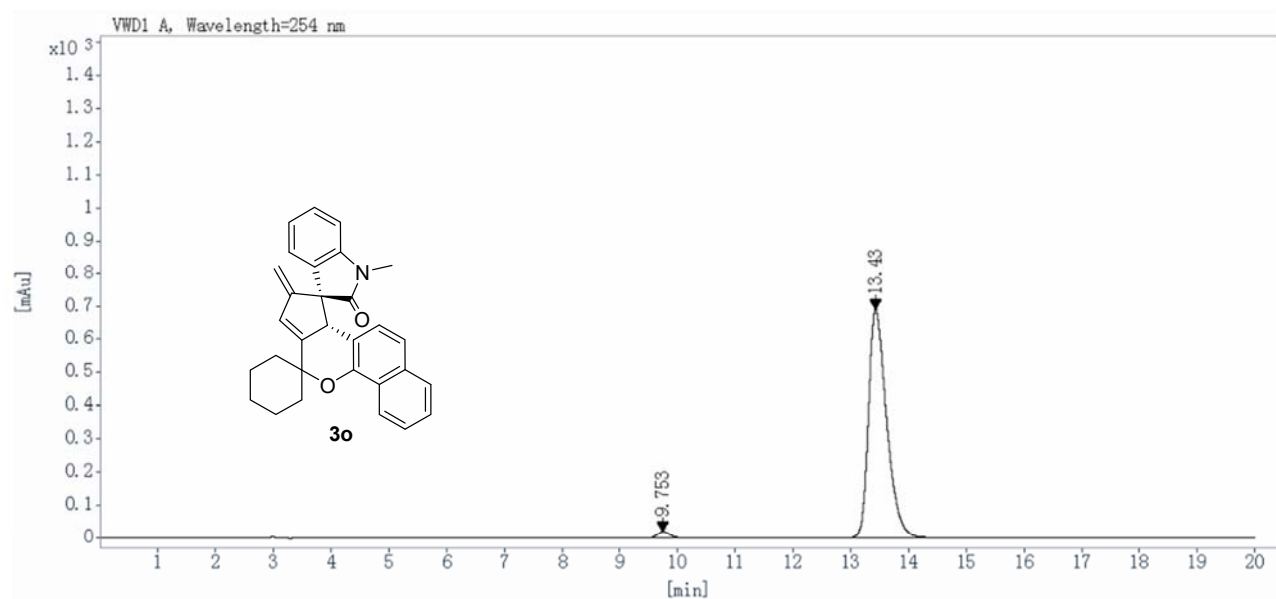

| Ret Time [min] | Peak Type | Width [min] | Height [mAU] | Area [mAU*s] | Area [%] |
|----------------|-----------|-------------|--------------|--------------|----------|
| 9.753          | BBA       | 0.21        | 19.0634      | 265.1130     | 1.7354   |
| 13.430         | BBA       | 0.33        | 690.0911     | 15012.0088   | 98.2646  |
| Totals:        |           |             |              | 15277.1218   | 100.0000 |

Spectrum from 20230705.wif2 (sample 79) - 74, +TOF MS (100 - 600) from 0.059 to 0.120 min, noise filtered (noise multiplier = 1.5), Gaussian smoothed (0.5 points), centroided

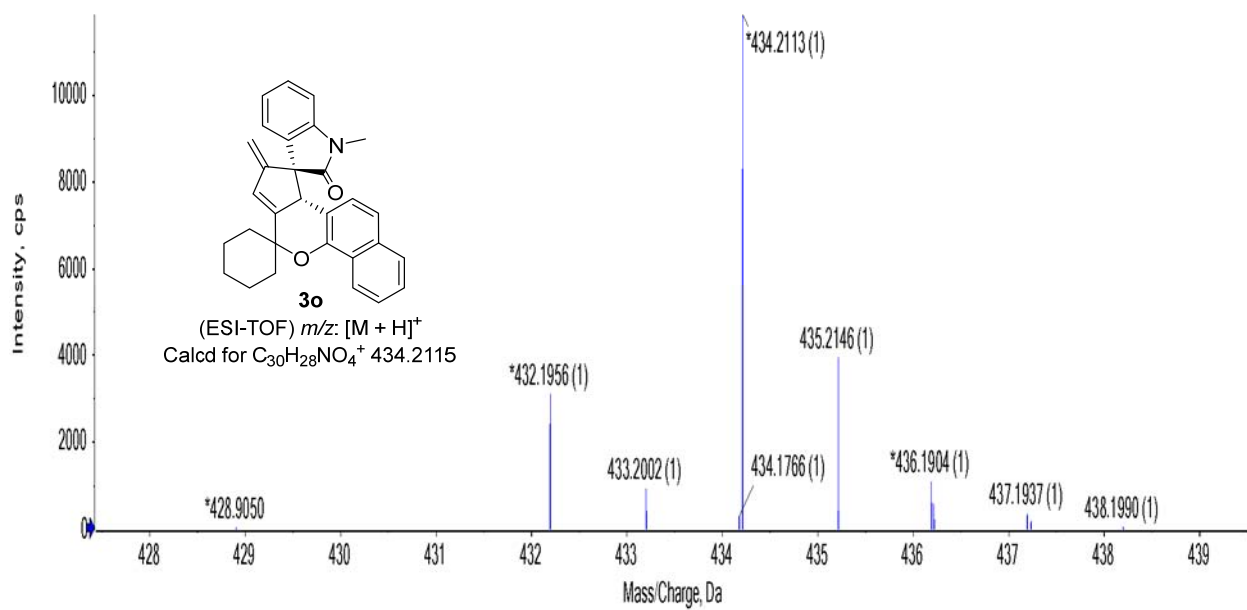



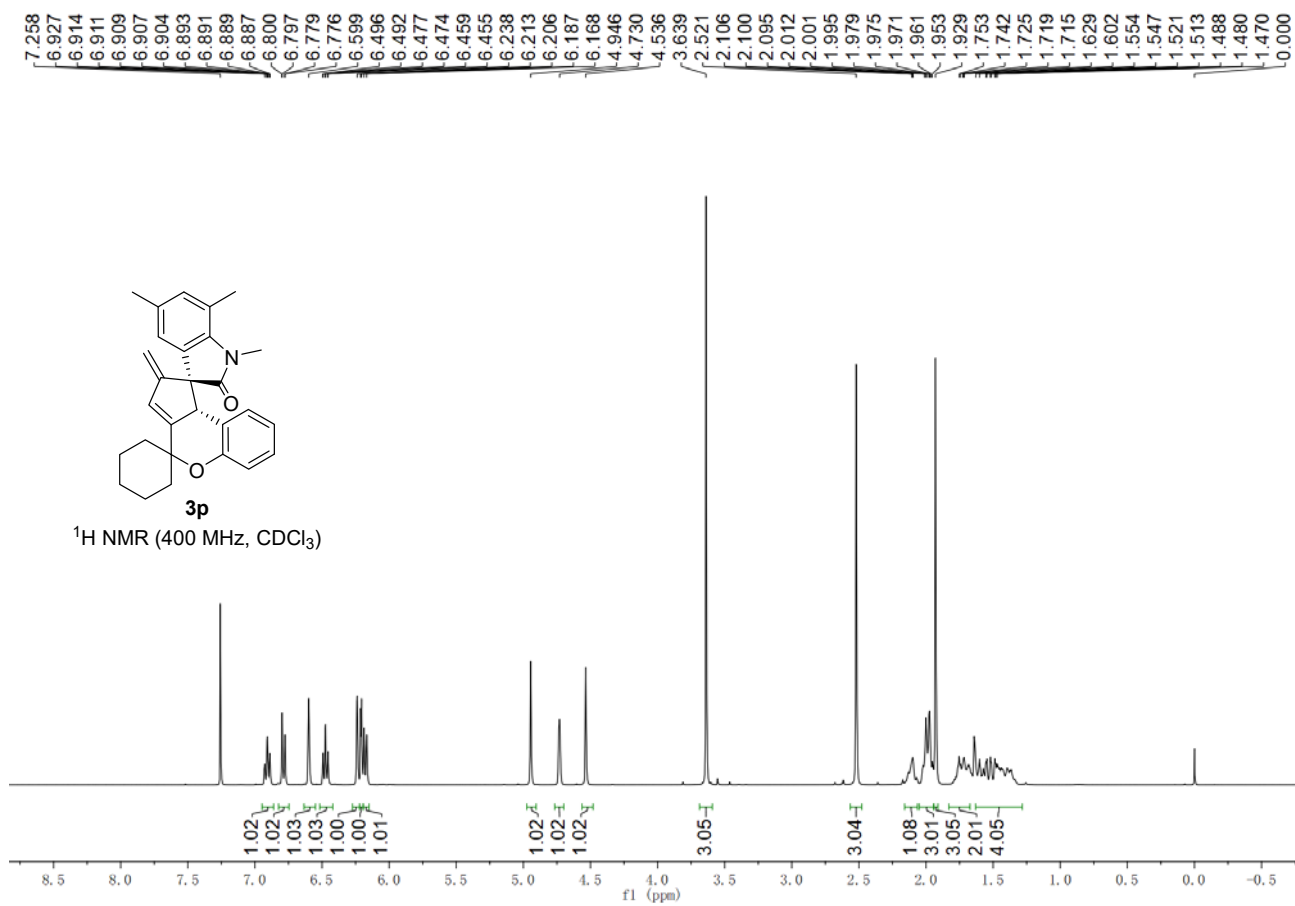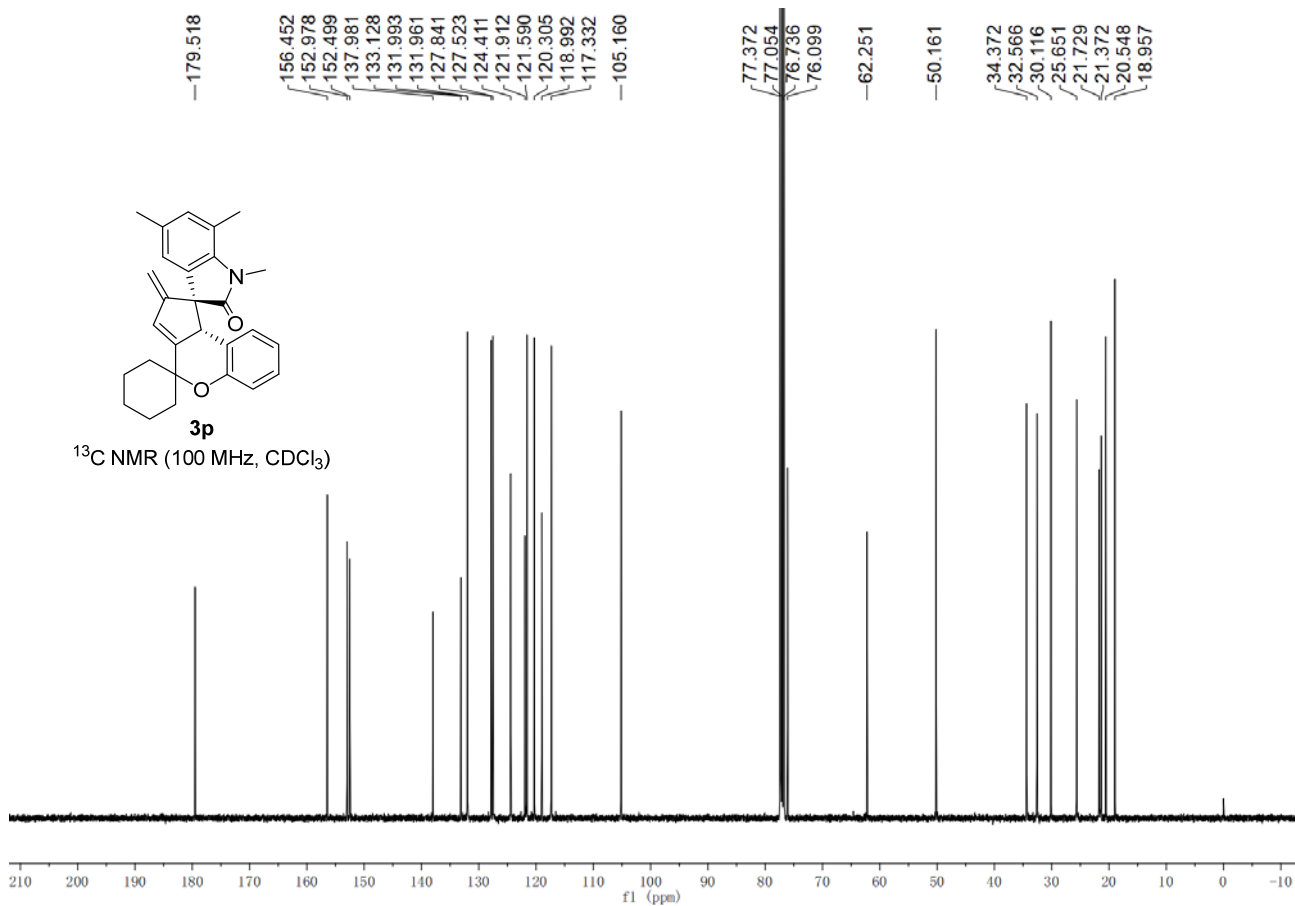

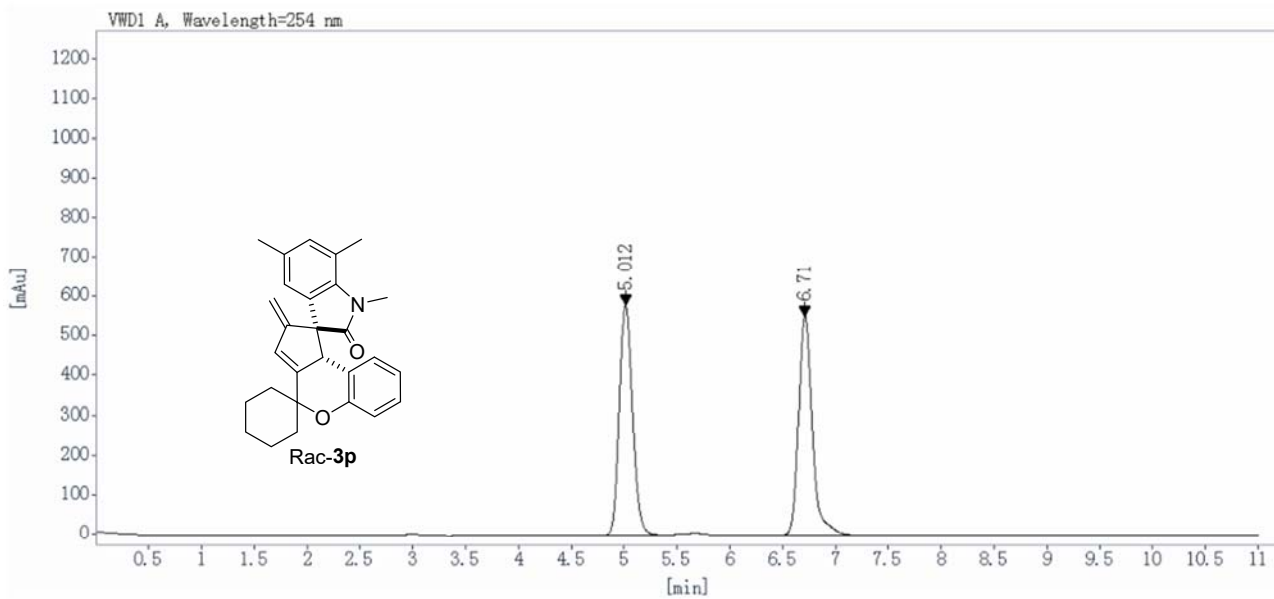

| Ret Time [min] | Peak Type | Width [min] | Height [mAU] | Area [mAU*s] | Area [%] |
|----------------|-----------|-------------|--------------|--------------|----------|
| 5.012          | BBA       | 0.13        | 578.7755     | 5017.1655    | 50.0194  |
| 6.710          | BBA       | 0.14        | 550.9875     | 5013.2646    | 49.9806  |
| Totals:        |           |             |              | 10030.4302   | 100.0000 |

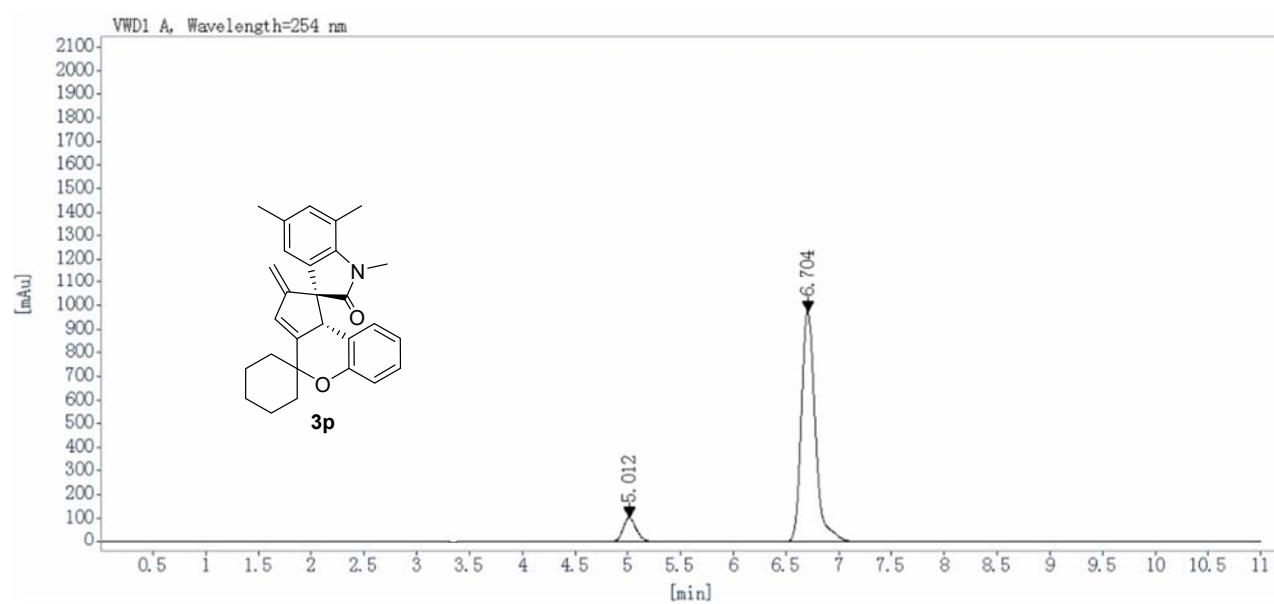

| Ret Time [min] | Peak Type | Width [min] | Height [mAU] | Area [mAU*s] | Area [%] |
|----------------|-----------|-------------|--------------|--------------|----------|
| 5.012          | BB        | 0.13        | 102.0049     | 887.6588     | 9.0235   |
| 6.704          | BBA       | 0.14        | 976.2433     | 8949.5518    | 90.9765  |
| Totals:        |           |             |              | 9837.2106    | 100.0000 |

Spectrum from 20230705.wif2 (sample 72) - 67, +TOF MS (100 - 600) from 0.044 to 0.106 min, noise filtered (noise multiplier = 1.5), Gaussian smoothed (0.5 points), Recalibrated, centroided

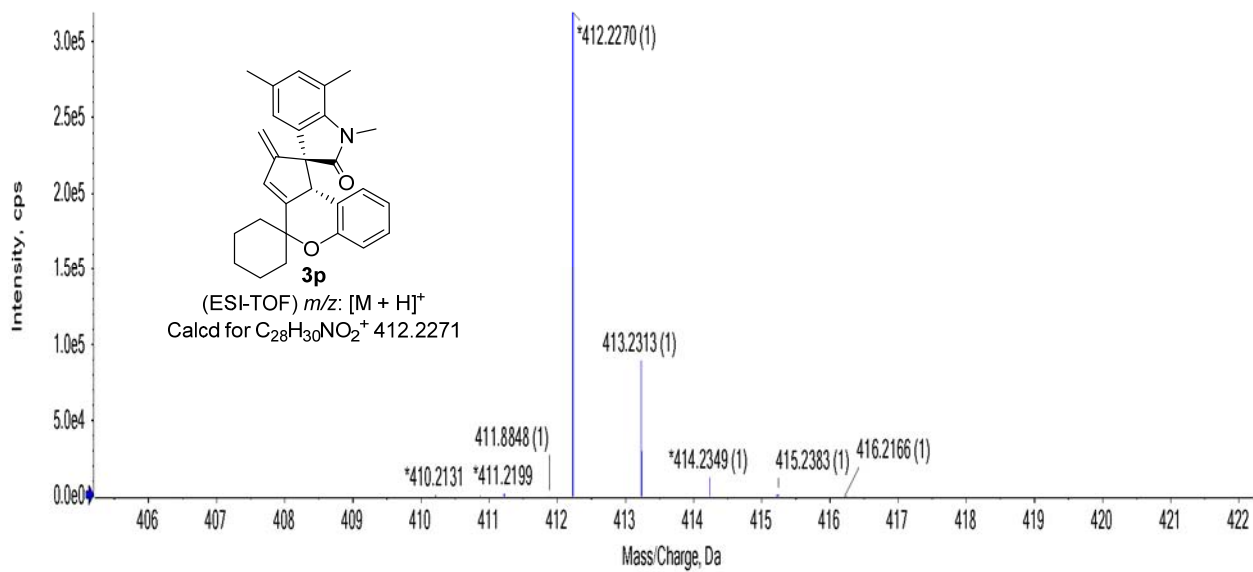

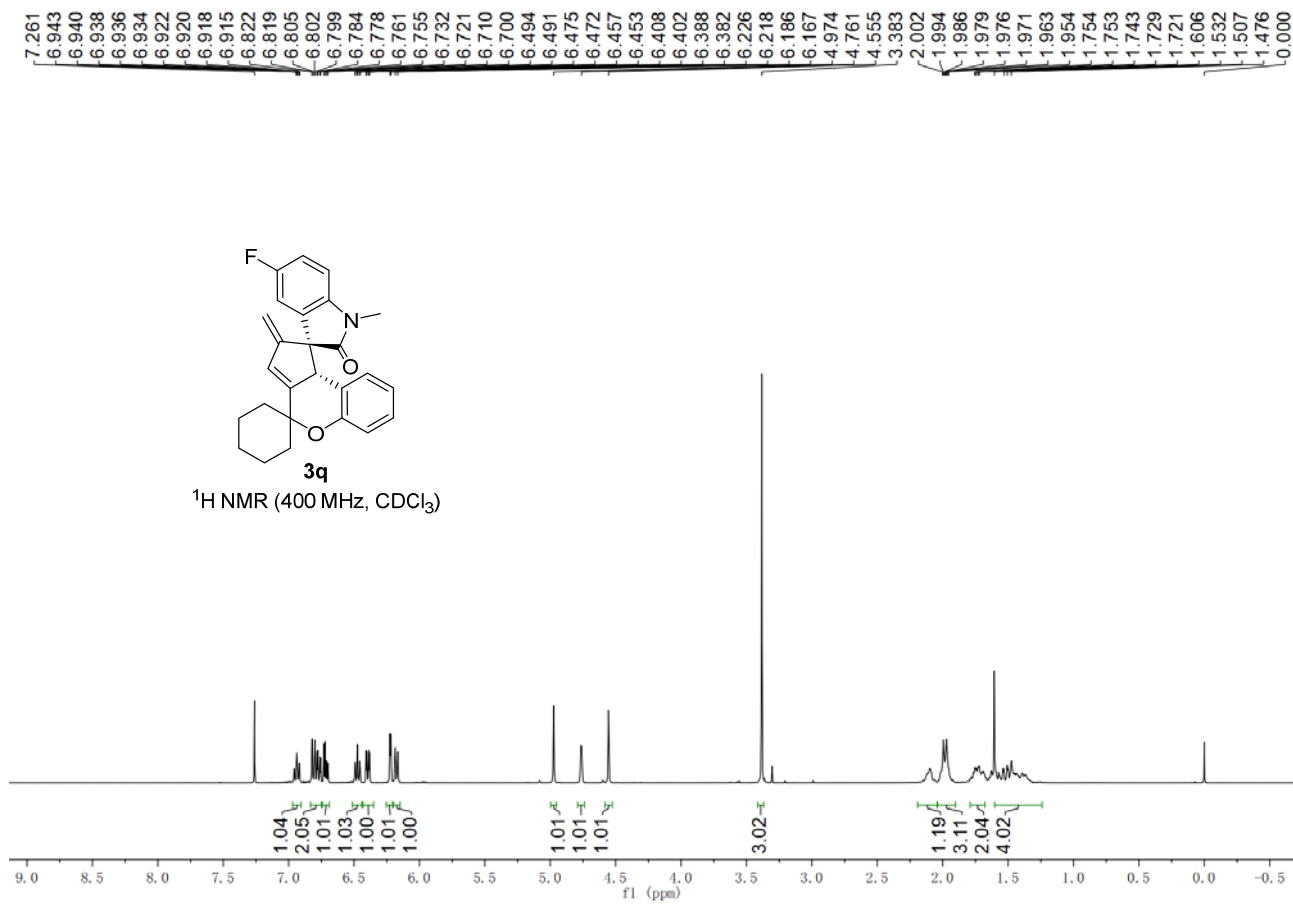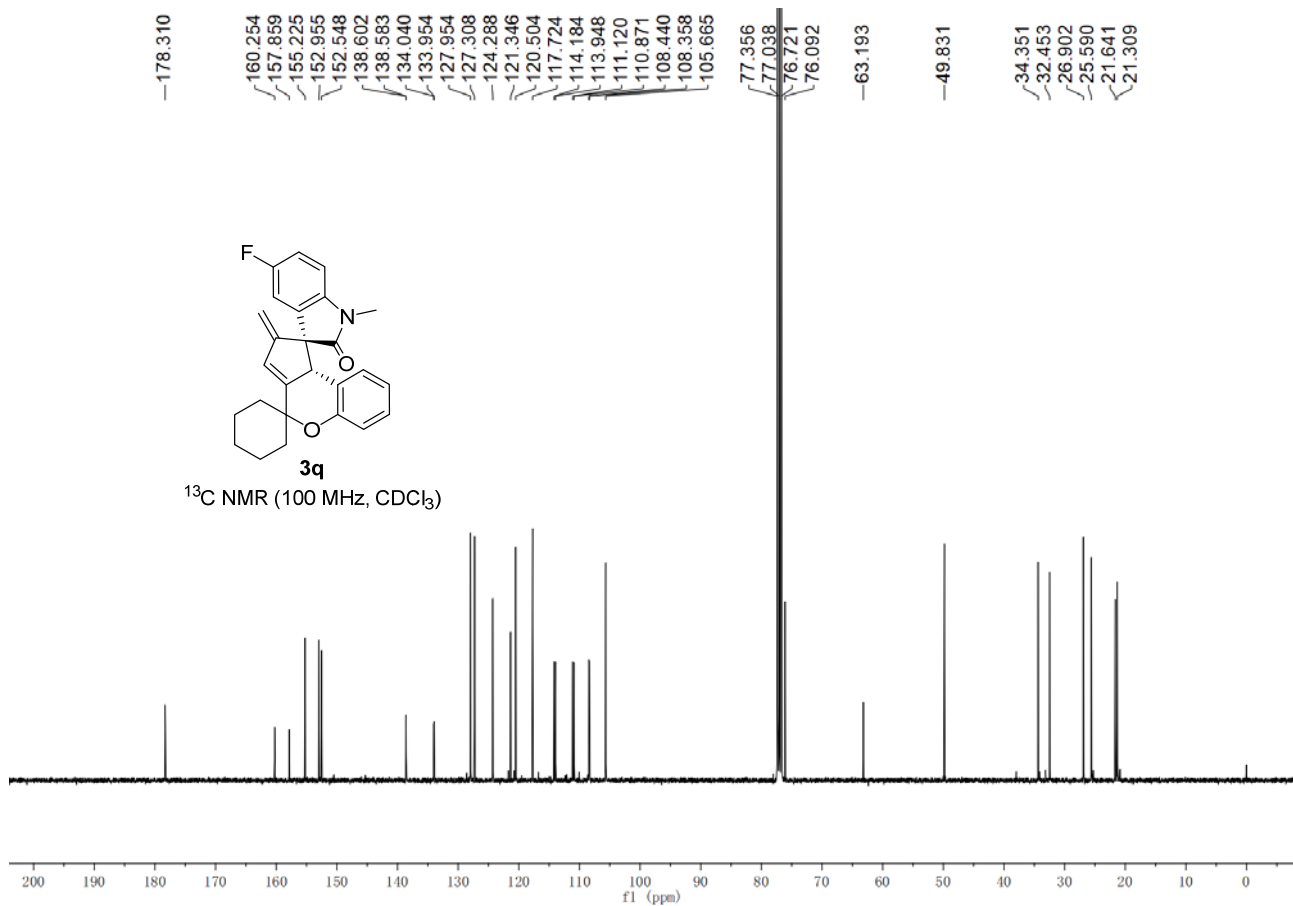

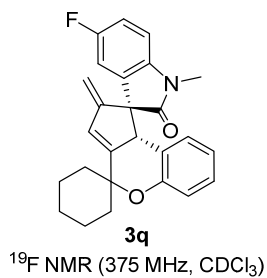

---120.199

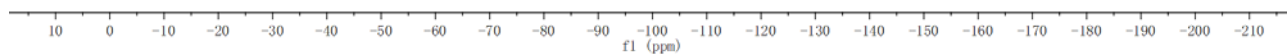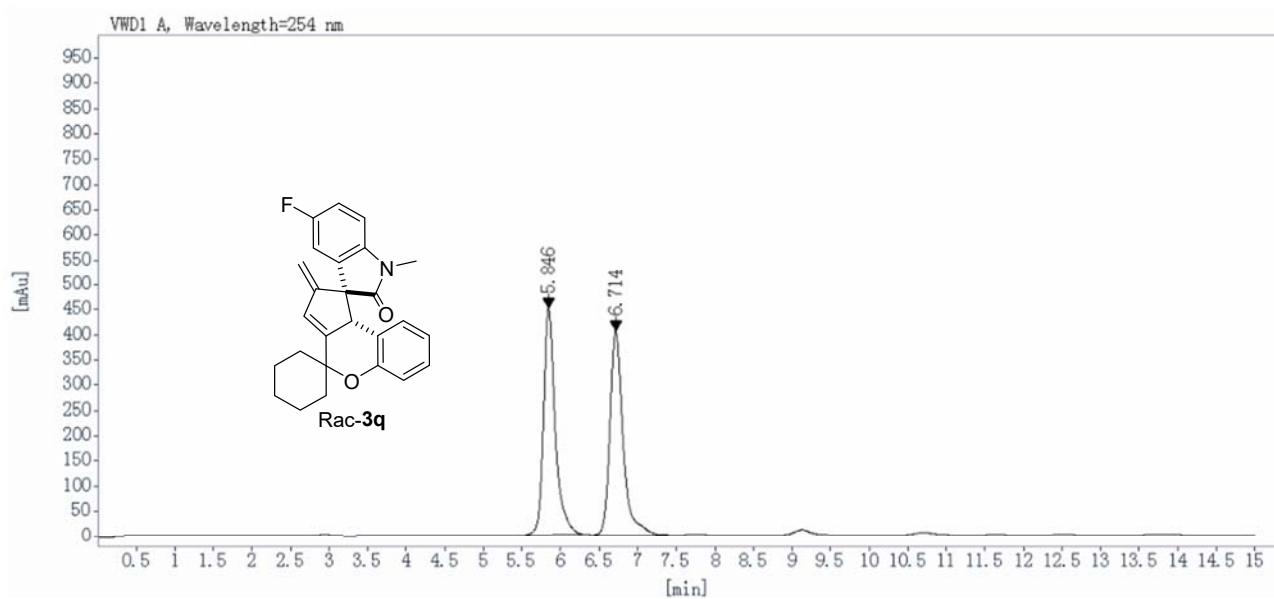

| Ret Time [min] | Peak Type | Width [min] | Height [mAU] | Area [mAU*s] | Area [%] |
|----------------|-----------|-------------|--------------|--------------|----------|
| 5.846          | BBA       | 0.16        | 451.7264     | 4895.7183    | 50.3676  |
| 6.714          | BBA       | 0.18        | 405.9886     | 4824.2539    | 49.6324  |
| Totals:        |           |             |              | 9719.9722    | 100.0000 |

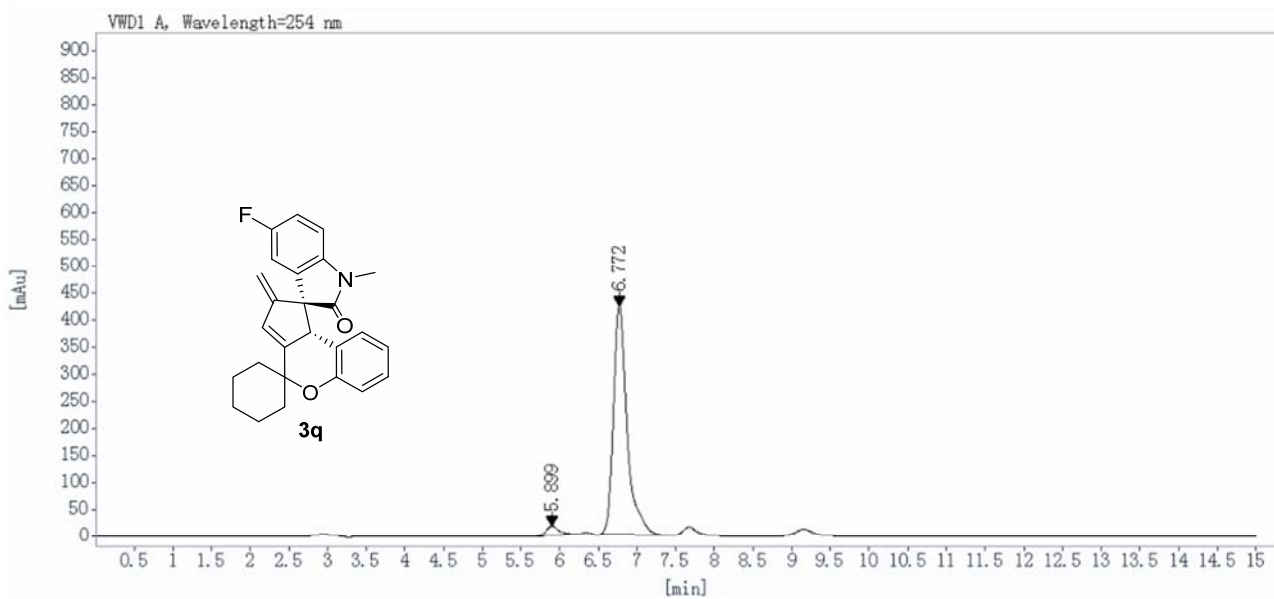

| Ret Time [min] | Peak Type | Width [min] | Height [mAU] | Area [mAU*s] | Area [%] |
|----------------|-----------|-------------|--------------|--------------|----------|
| 5.899          | BBA       | 0.17        | 18.3742      | 204.3898     | 3.7710   |
| 6.772          | BB        | 0.18        | 423.1734     | 5215.7002    | 96.2290  |
| Totals:        |           |             |              | 5420.0900    | 100.0000 |

Spectrum from 20230705.wiff2 (sample 73) - 68, +TOF MS (100 - 600) from 0.053 to 0.114 min, noise filter...2 min, noise filtered (noise multiplier = 1.5), Gaussian smoothed (0.5 points), Recalibrated, centroided

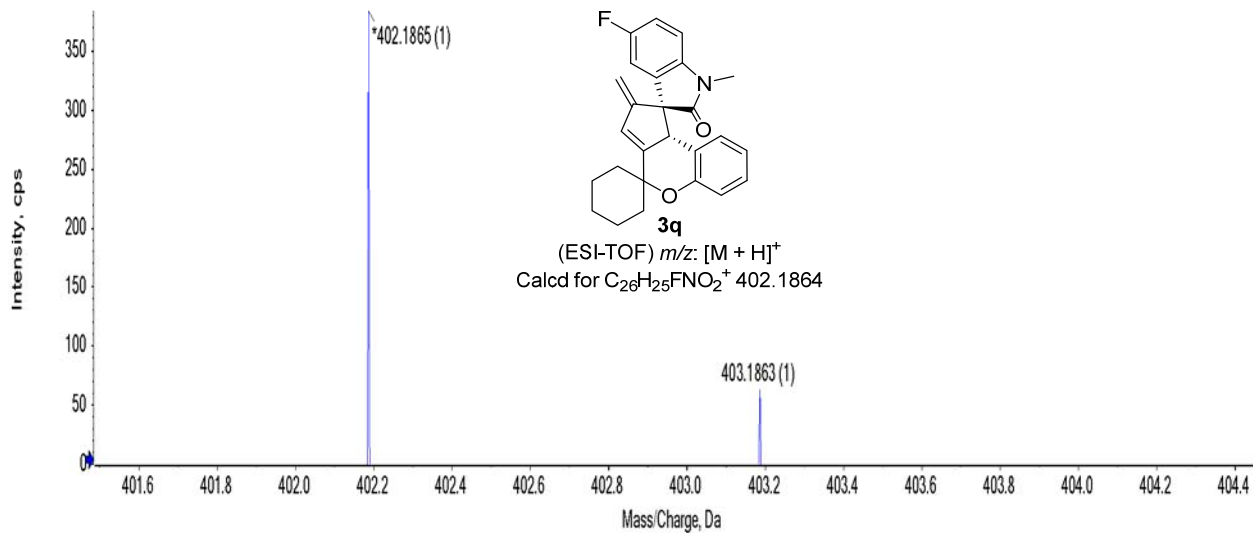

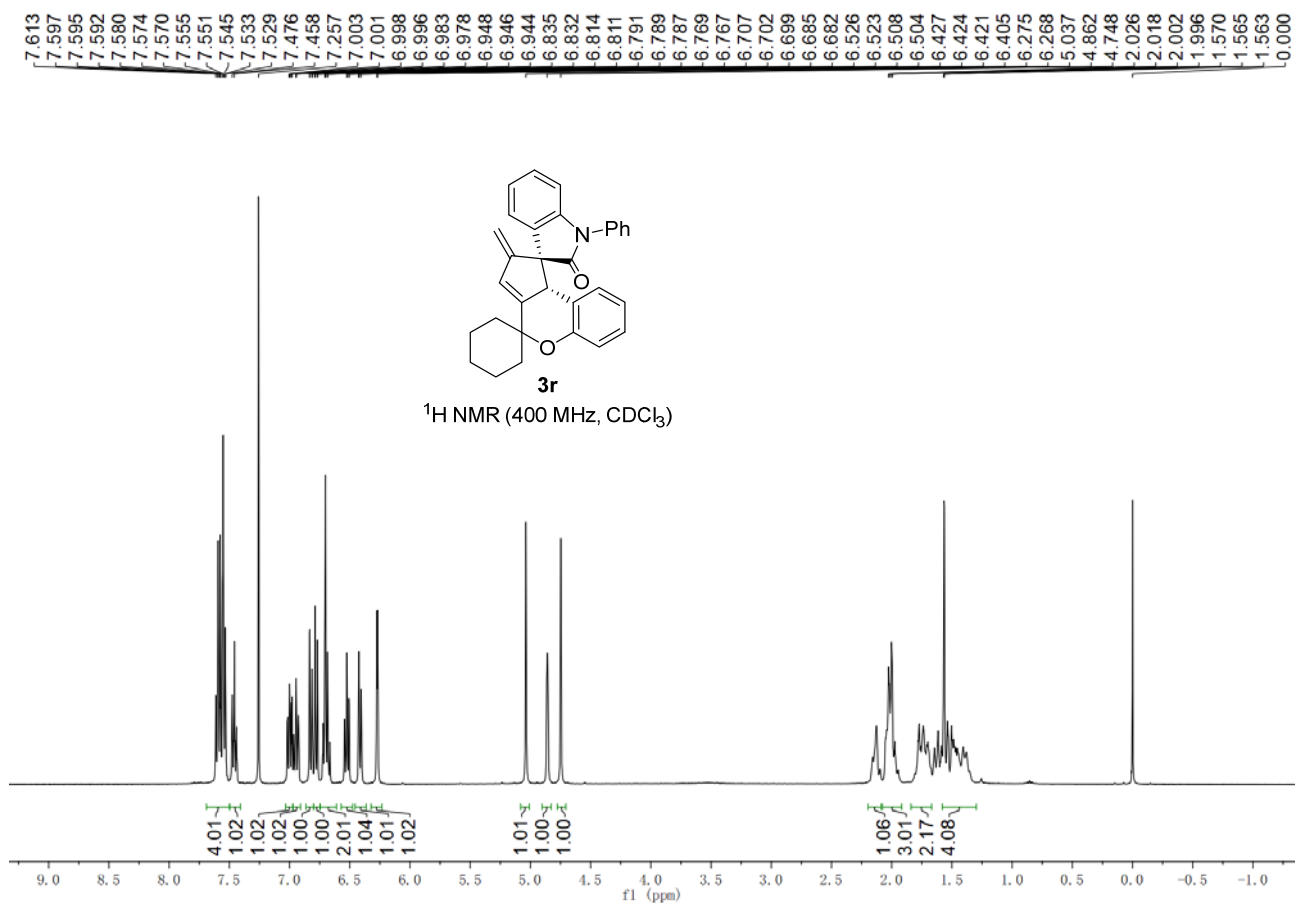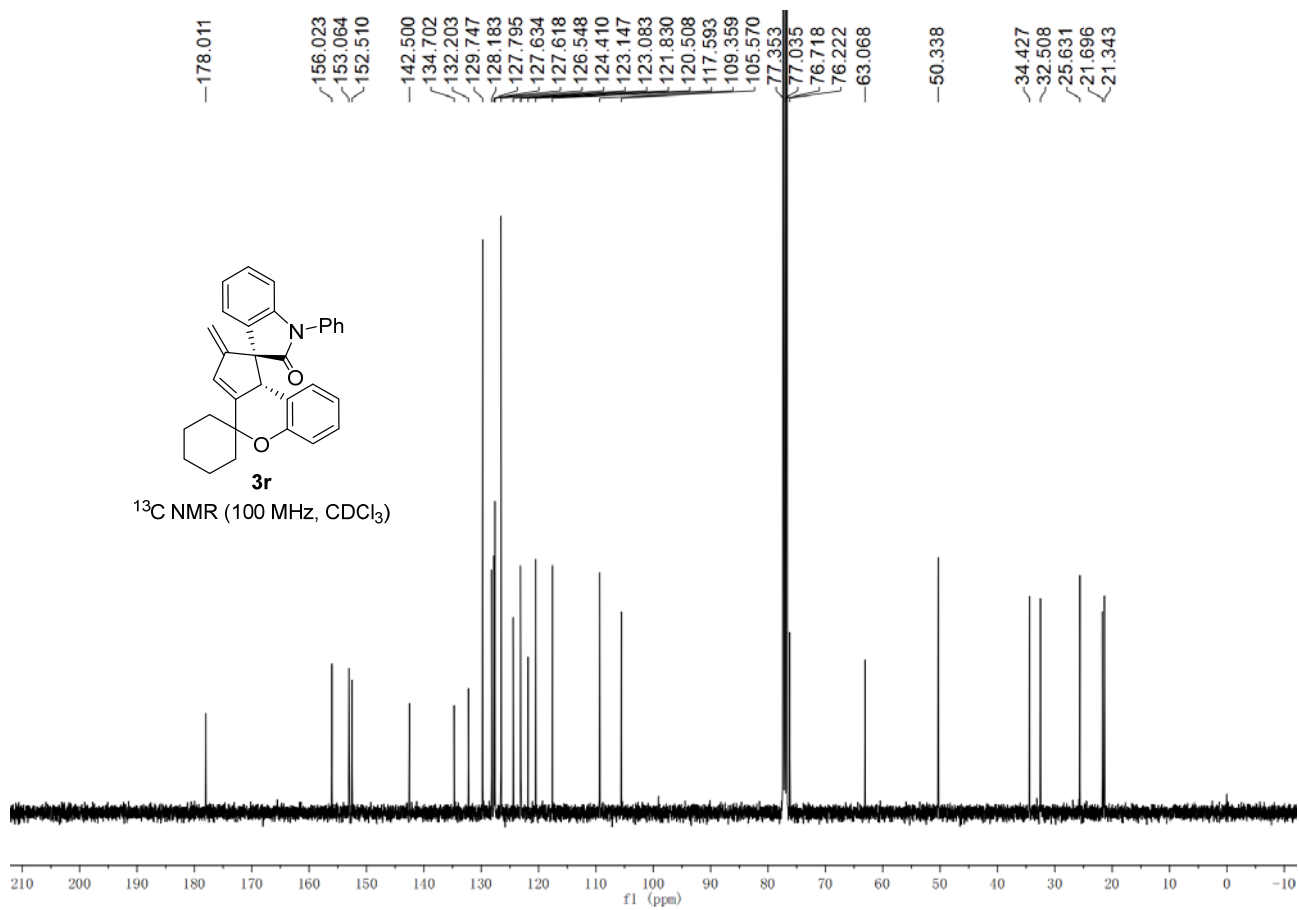

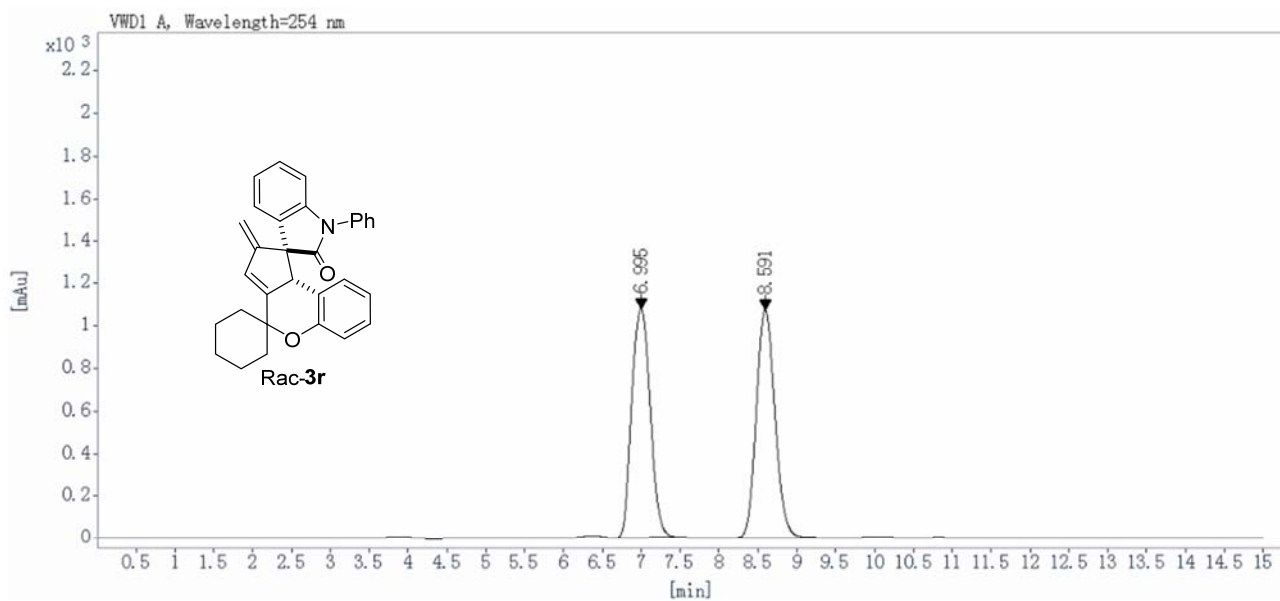

| Ret Time [min] | Peak Type | Width [min] | Height [mAU] | Area [mAU*s] | Area [%] |
|----------------|-----------|-------------|--------------|--------------|----------|
| 6.995          | BBA       | 0.27        | 1077.7903    | 17849.4648   | 49.7720  |
| 8.591          | BBA       | 0.26        | 1073.0360    | 18012.9883   | 50.2280  |
| Totals:        |           |             |              | 35862.4531   | 100.0000 |

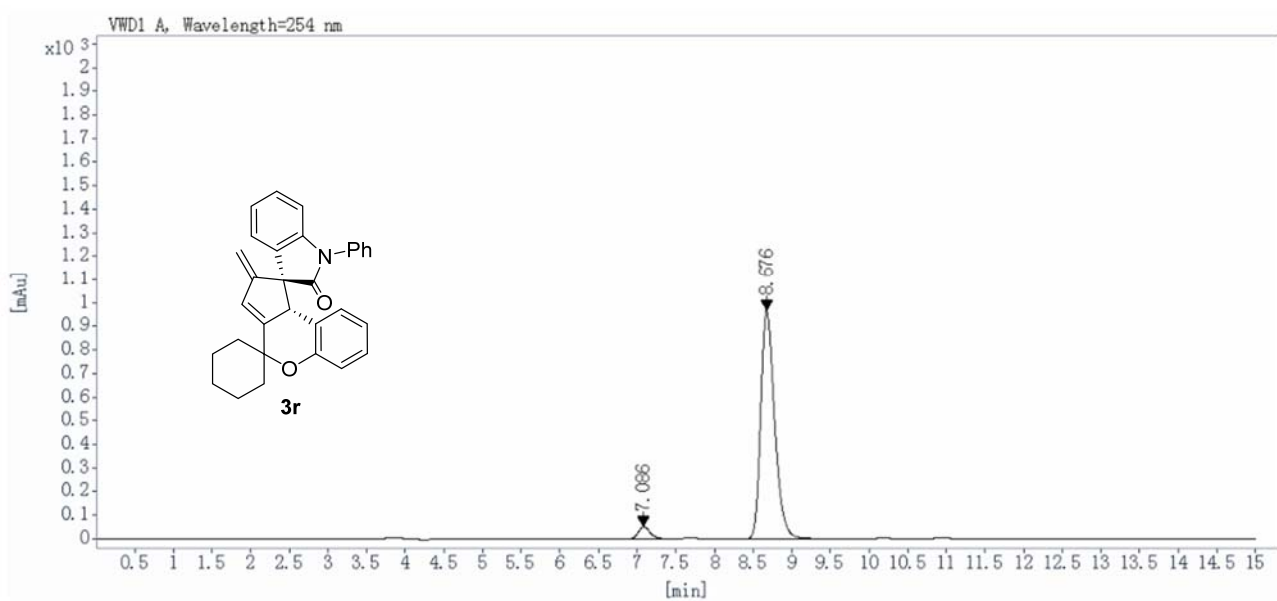

| Ret Time [min] | Peak Type | Width [min] | Height [mAU] | Area [mAU*s] | Area [%] |
|----------------|-----------|-------------|--------------|--------------|----------|
| 7.086          | BB        | 0.16        | 51.1723      | 542.4835     | 4.3210   |
| 8.676          | BBA       | 0.19        | 969.4561     | 12012.2246   | 95.6790  |
| Totals:        |           |             |              | 12554.7081   | 100.0000 |



Spectrum from 20230705.wiff2 (sample 78) - 73, +TOF MS (100 - 600) from 0.059 to 0.120 min, noise filtere...035 to 1.472 min, noise filtered (noise multiplier = 1.5), Gaussian smoothed (0.5 points)] Recalibrated

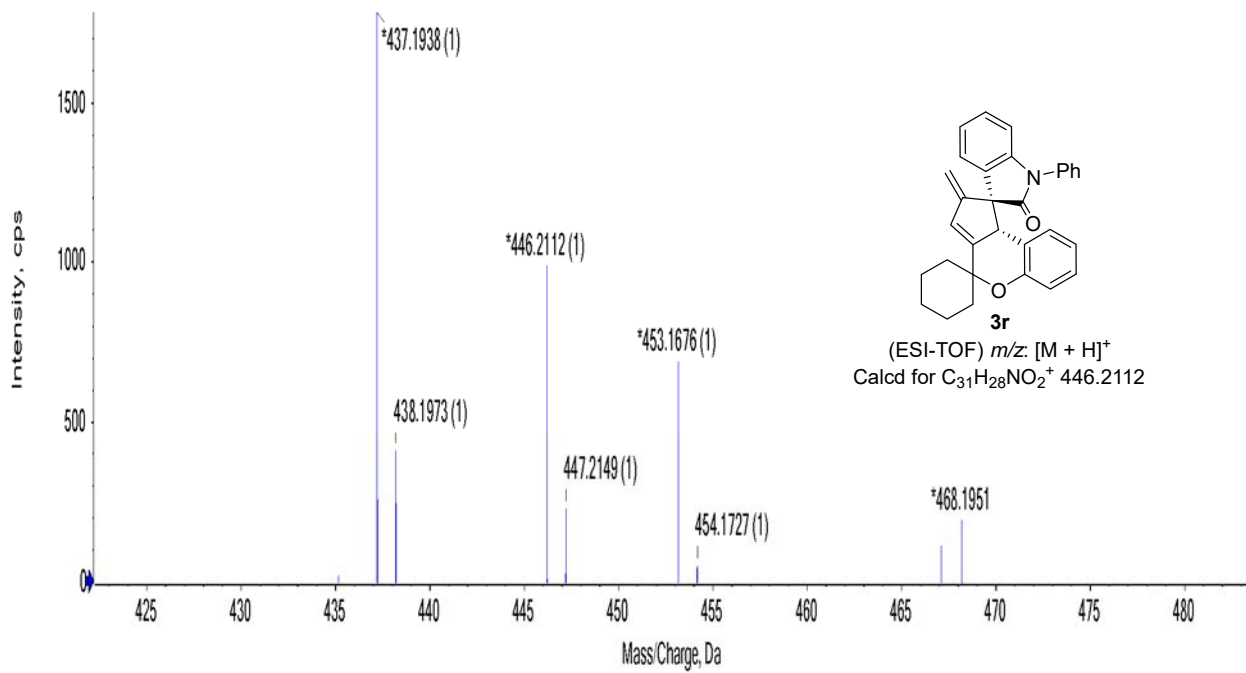

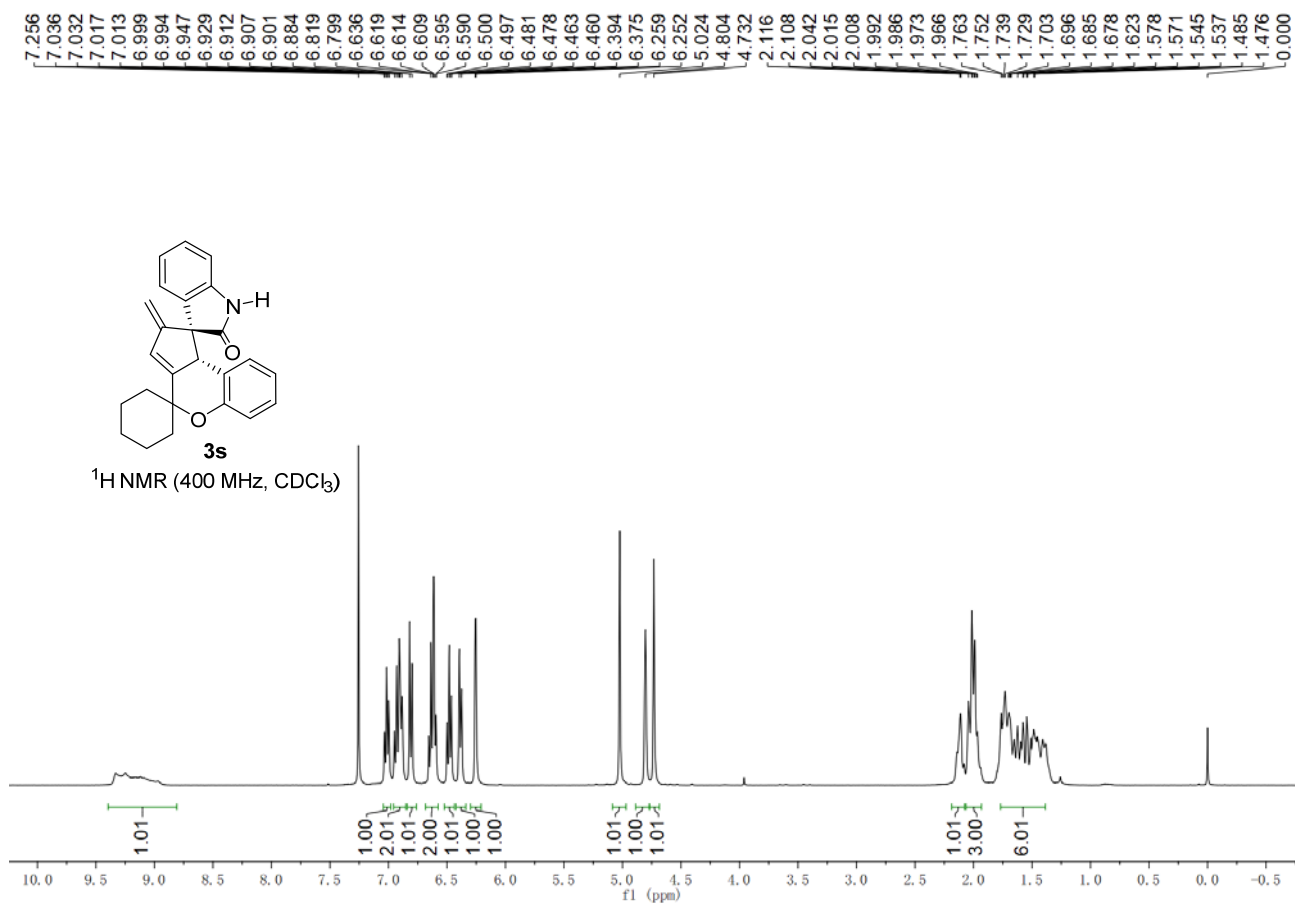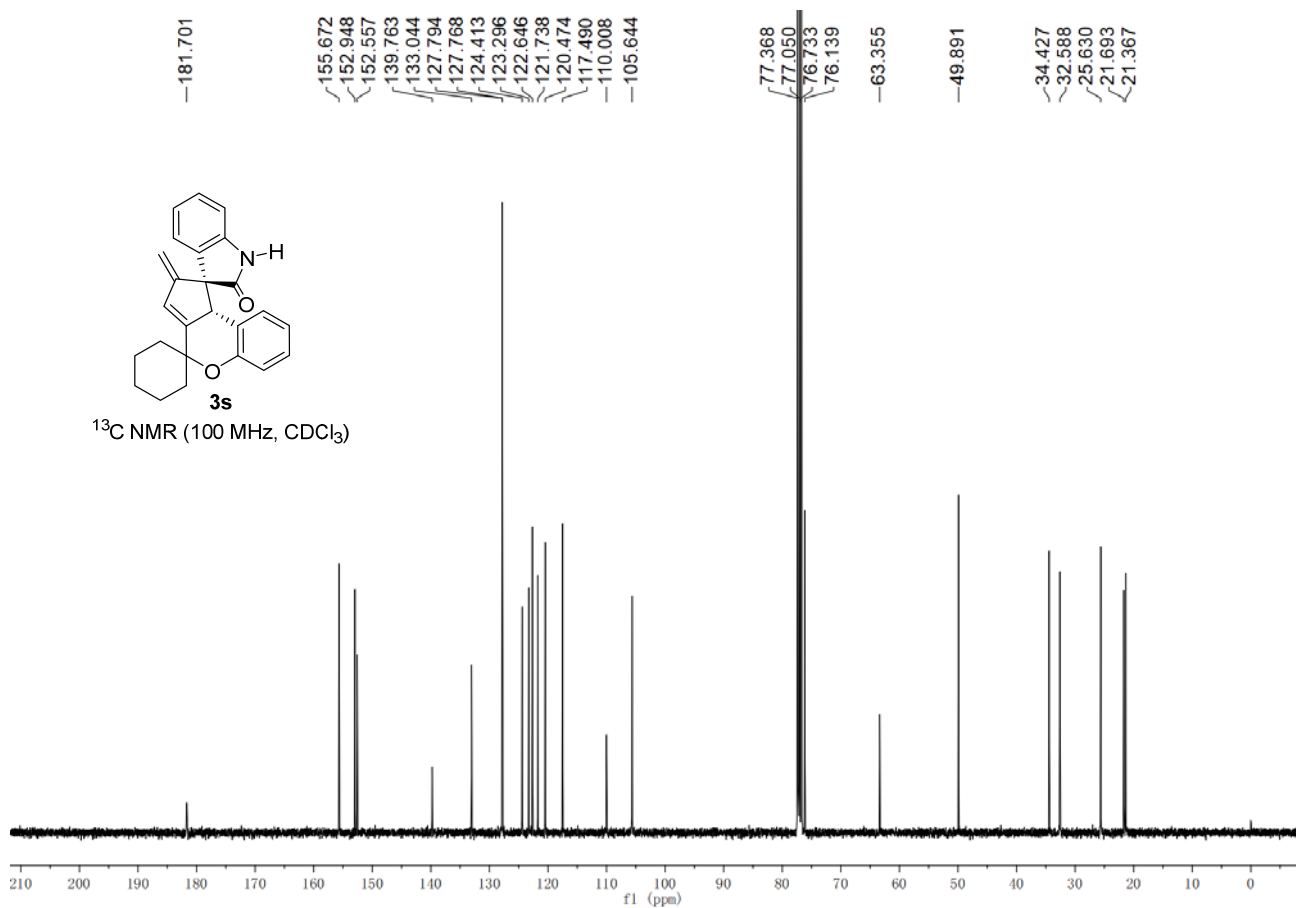

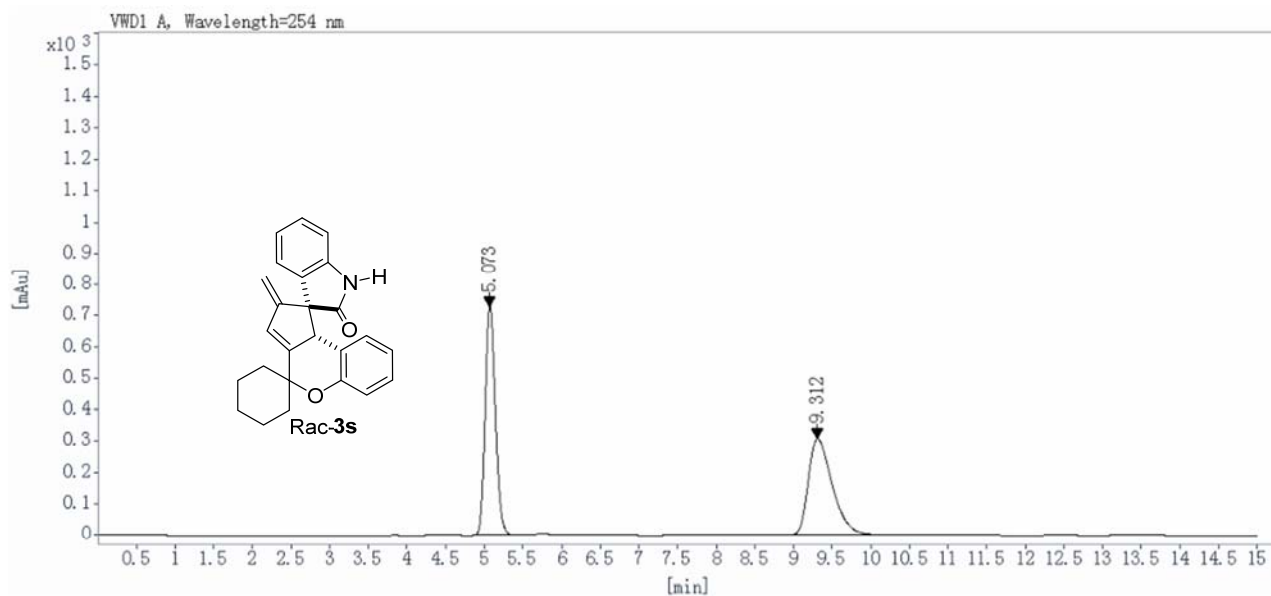

| Ret Time [min] | Peak Type | Width [min] | Height [mAU] | Area [mAU*s] | Area [%] |
|----------------|-----------|-------------|--------------|--------------|----------|
| 5.073          | BBA       | 0.14        | 726.8414     | 6615.3110    | 49.9077  |
| 9.312          | BBA       | 0.33        | 308.0536     | 6639.7852    | 50.0923  |
| Totals:        |           |             |              | 13255.0962   | 100.0000 |

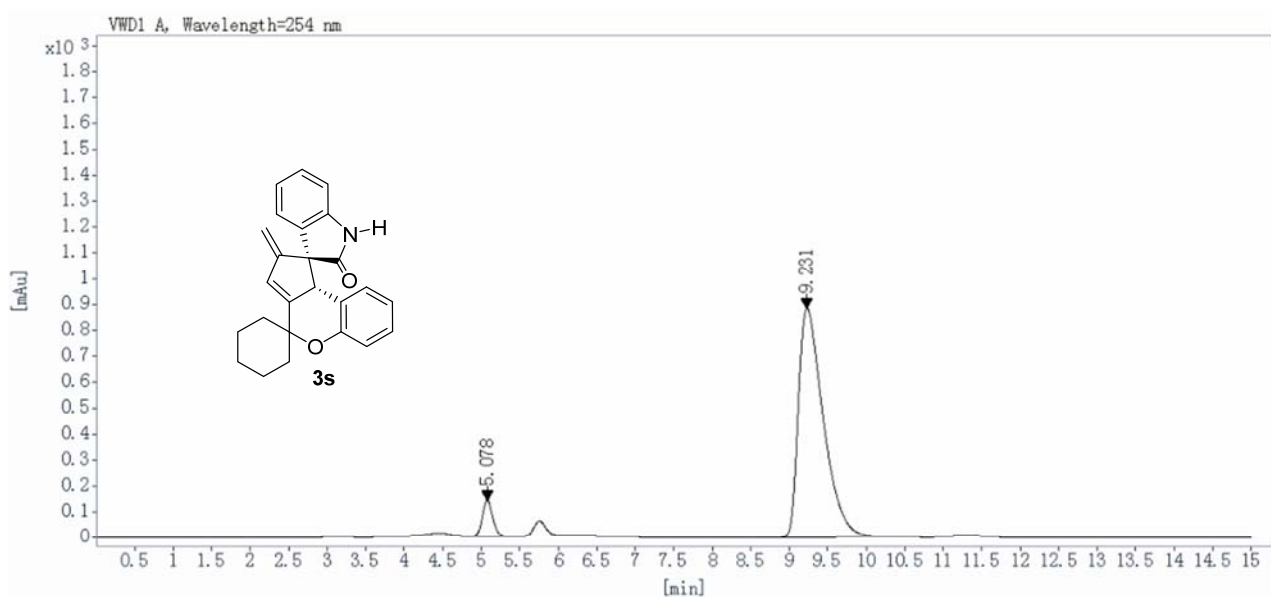

| Ret Time [min] | Peak Type | Width [min] | Height [mAU] | Area [mAU*s] | Area [%] |
|----------------|-----------|-------------|--------------|--------------|----------|
| 5.078          | BBA       | 0.14        | 140.4959     | 1284.6090    | 6.1001   |
| 9.231          | BBA       | 0.34        | 882.8427     | 19774.2598   | 93.8999  |
| Totals:        |           |             |              | 21058.8688   | 100.0000 |

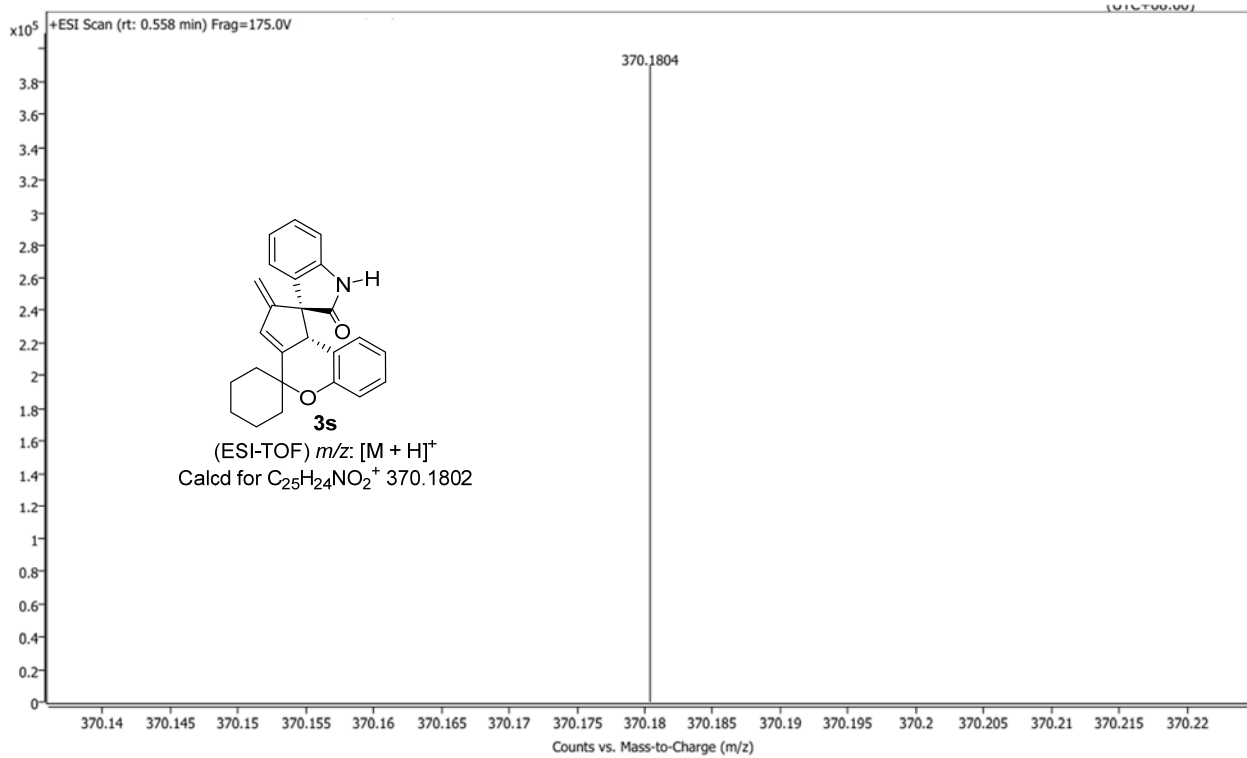

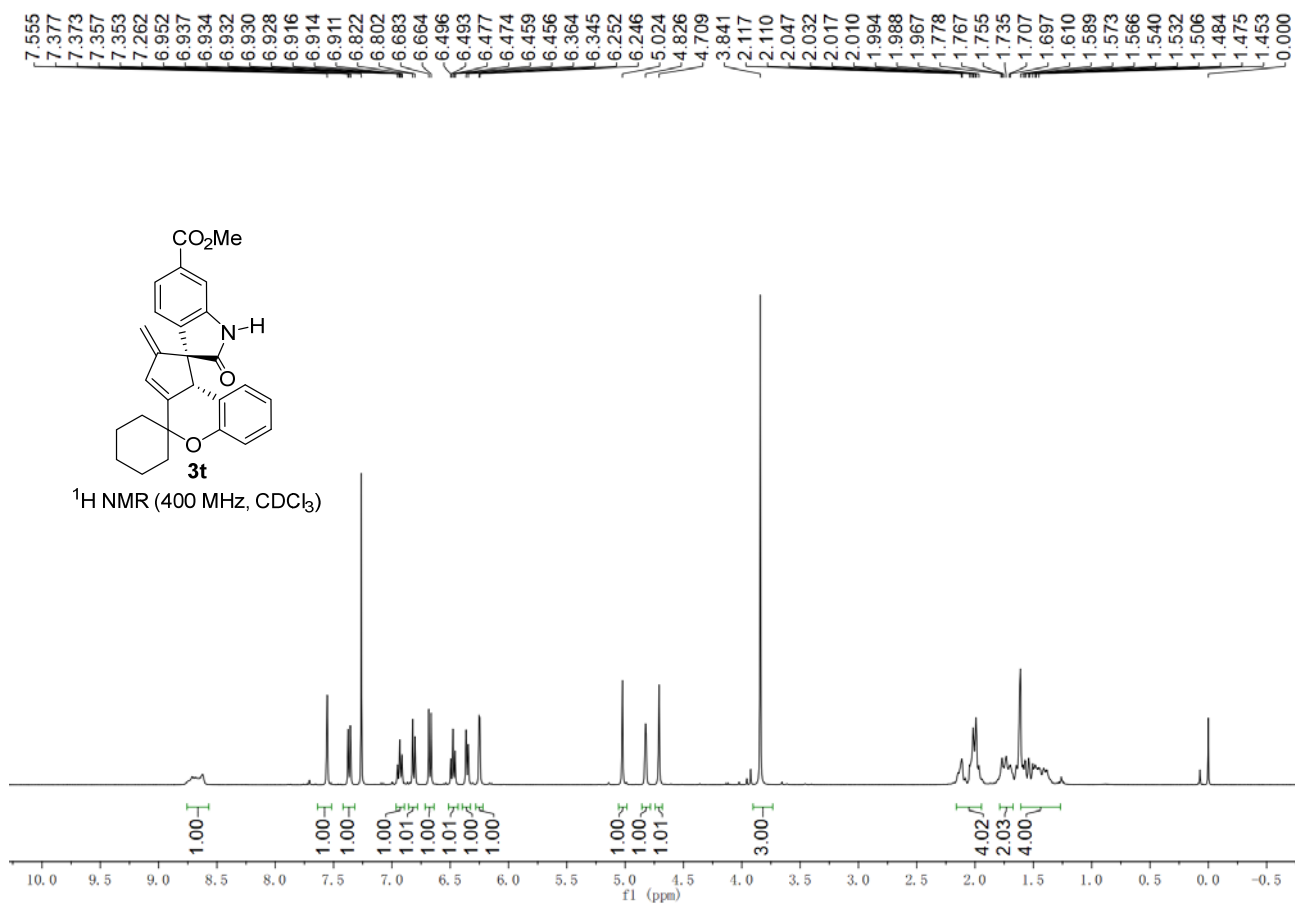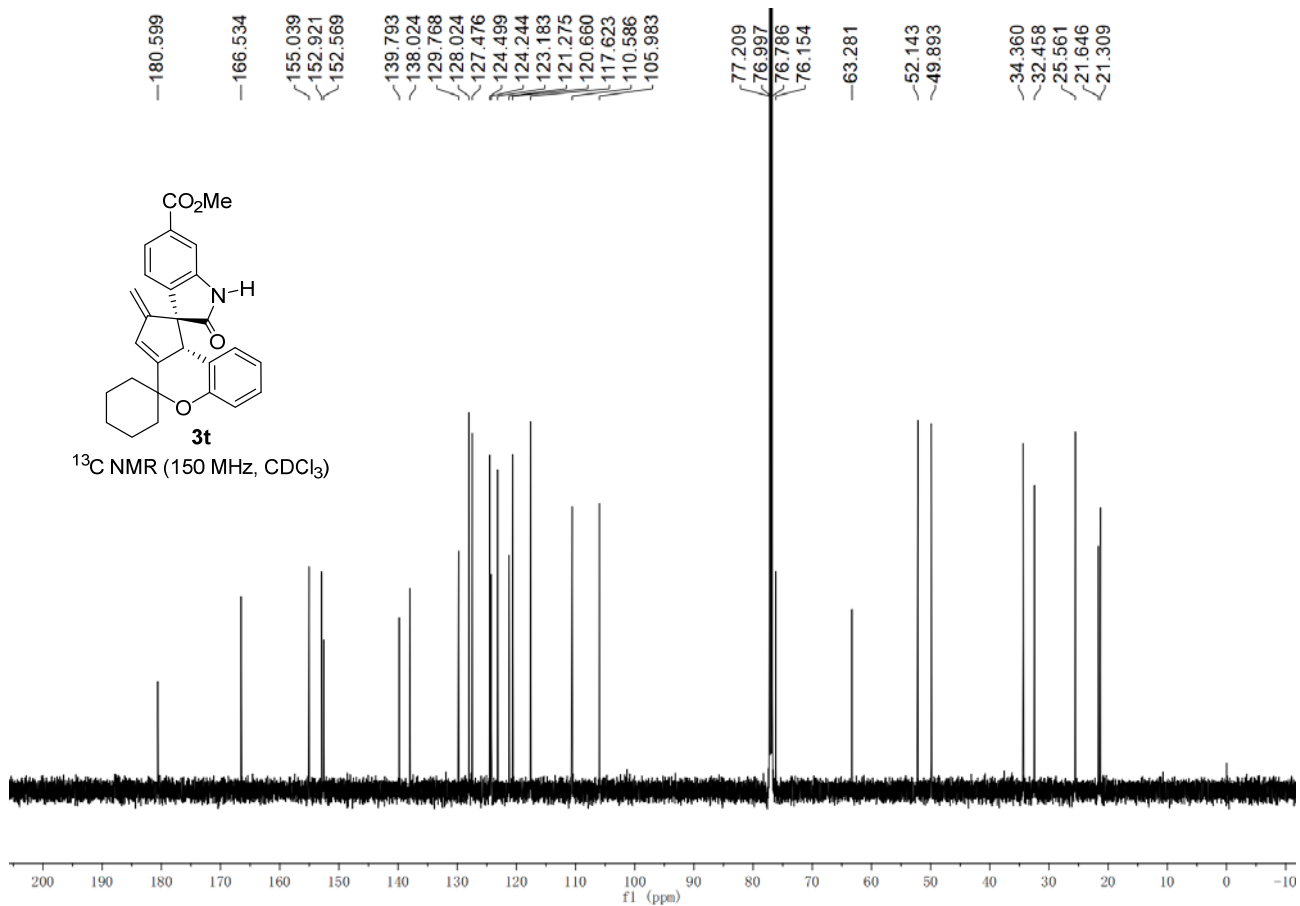

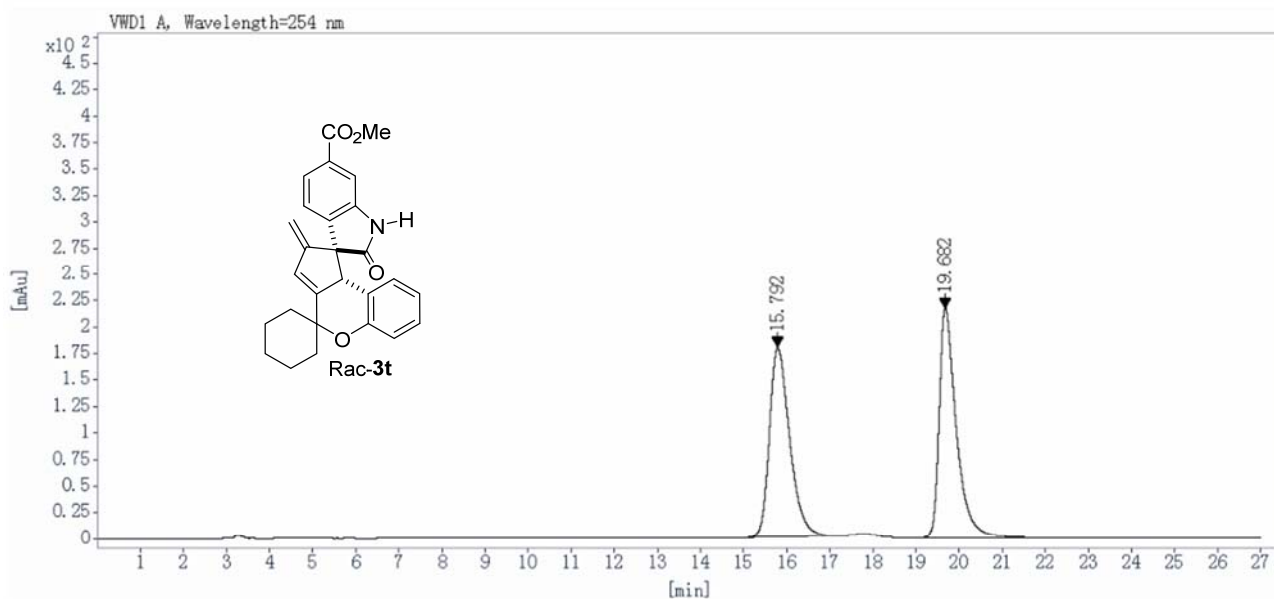

| Ret Time [min] | Peak Type | Width [min] | Height [mAU] | Area [mAU*s] | Area [%] |
|----------------|-----------|-------------|--------------|--------------|----------|
| 15.792         | BB        | 0.50        | 179.2602     | 5878.5820    | 49.5607  |
| 19.682         | BBA       | 0.41        | 217.1251     | 5982.7925    | 50.4393  |
| Totals:        |           |             |              | 11861.3745   | 100.0000 |

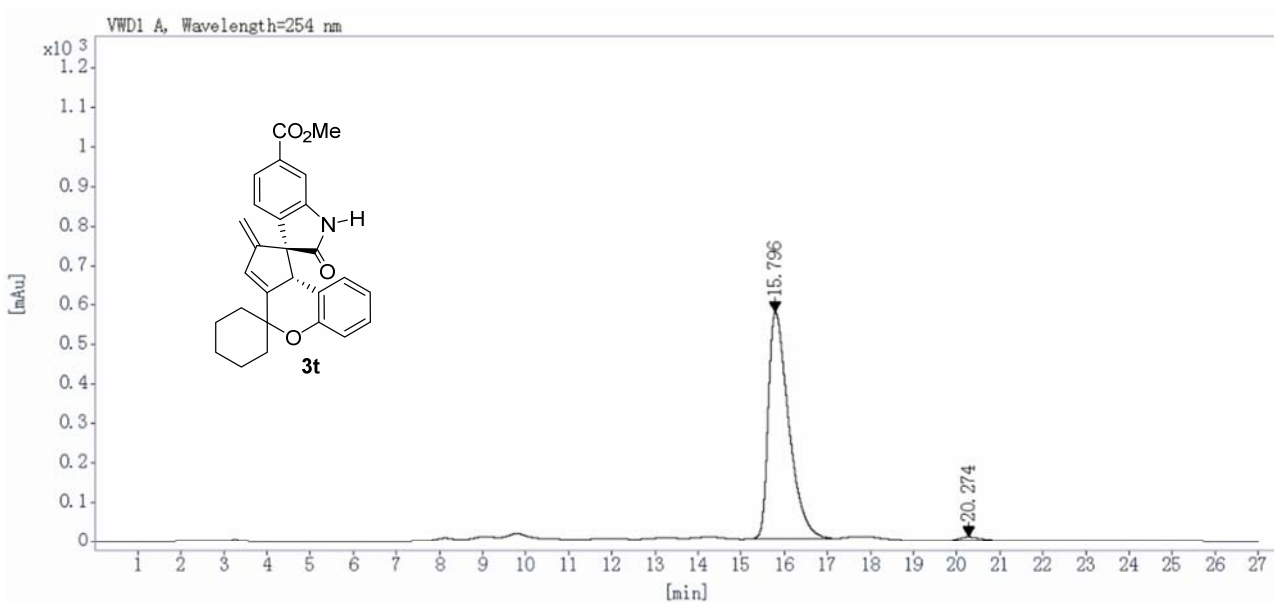

| Ret Time [min] | Peak Type | Width [min] | Height [mAU] | Area [mAU*s] | Area [%] |
|----------------|-----------|-------------|--------------|--------------|----------|
| 15.796         | BBA       | 0.50        | 575.8636     | 18961.9141   | 98.2026  |
| 20.274         | BBA       | 0.52        | 10.0001      | 347.0662     | 1.7974   |
| Totals:        |           |             |              | 19308.9803   | 100.0000 |

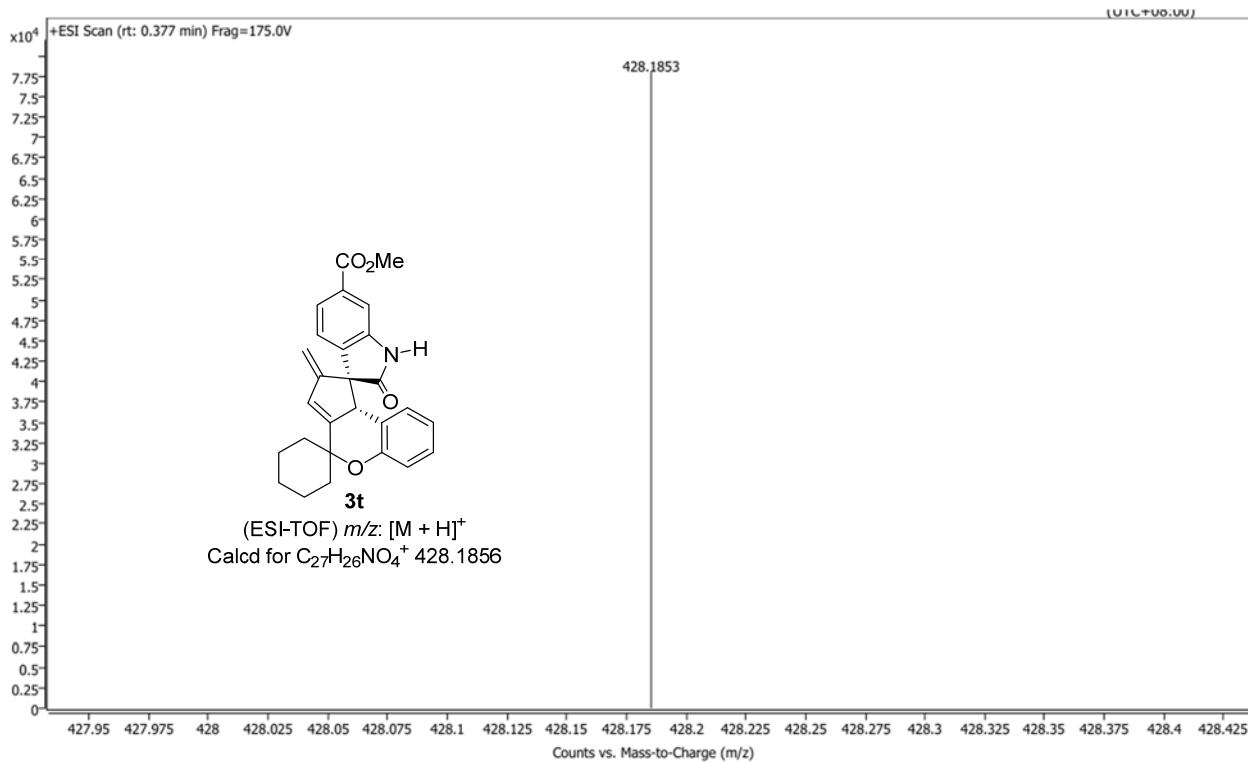

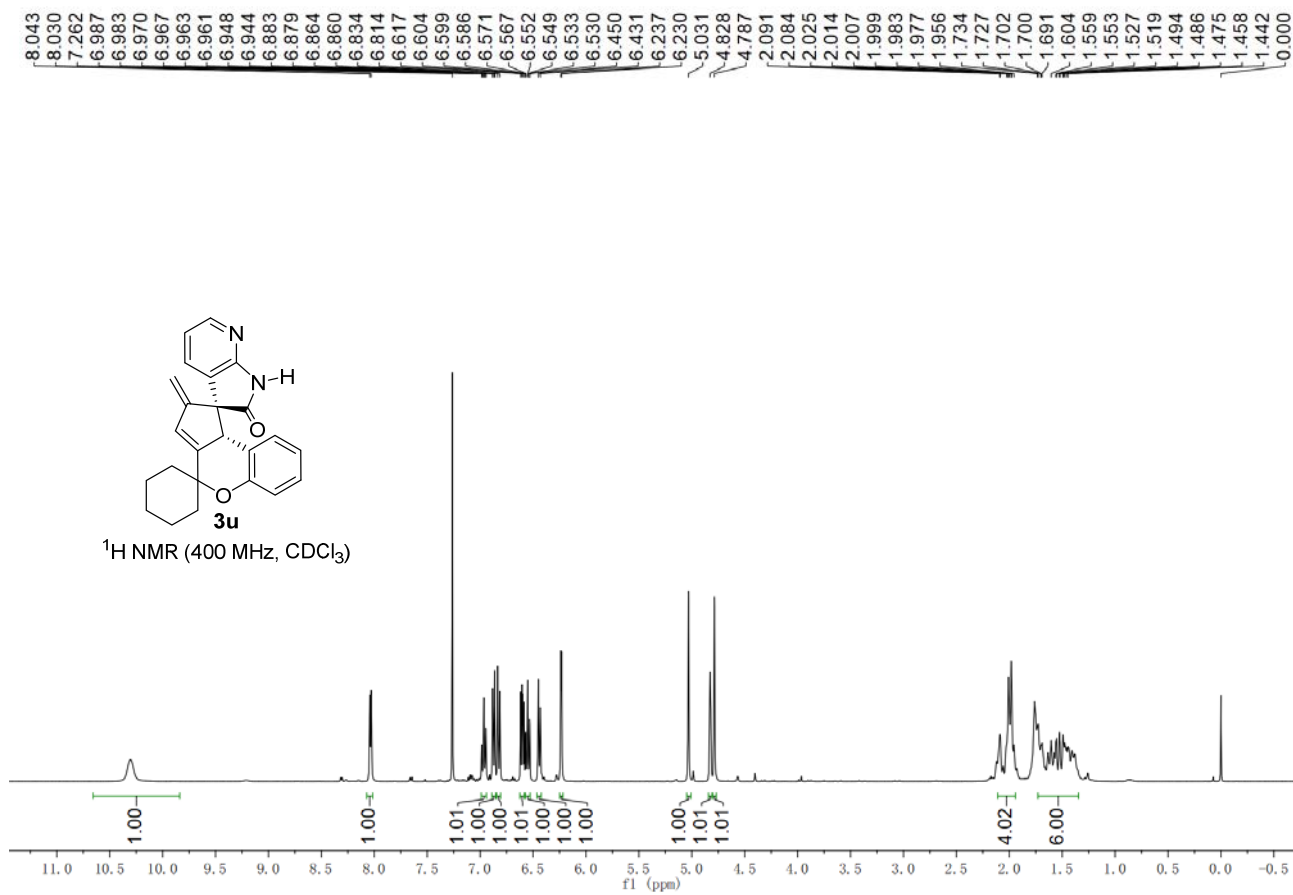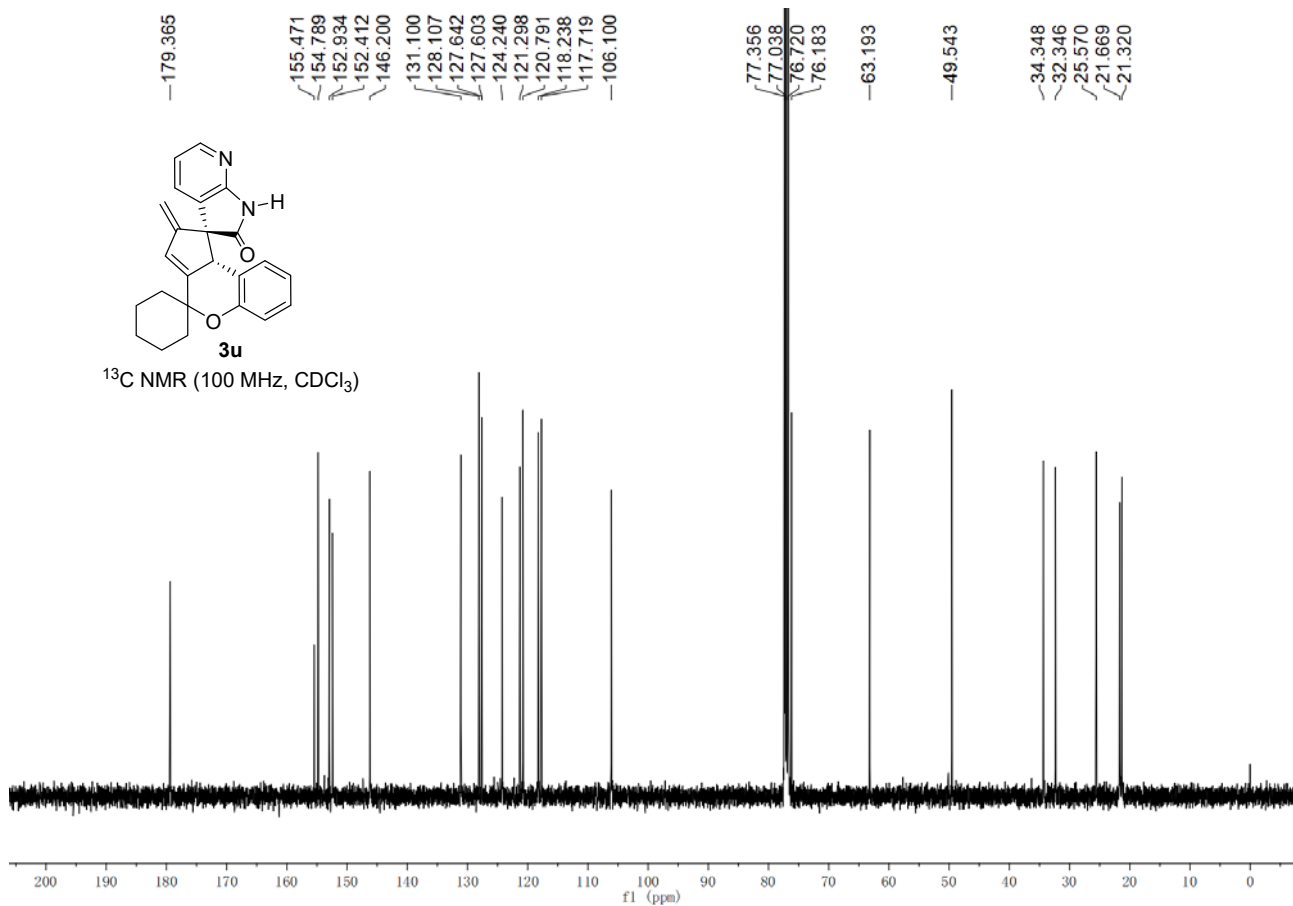



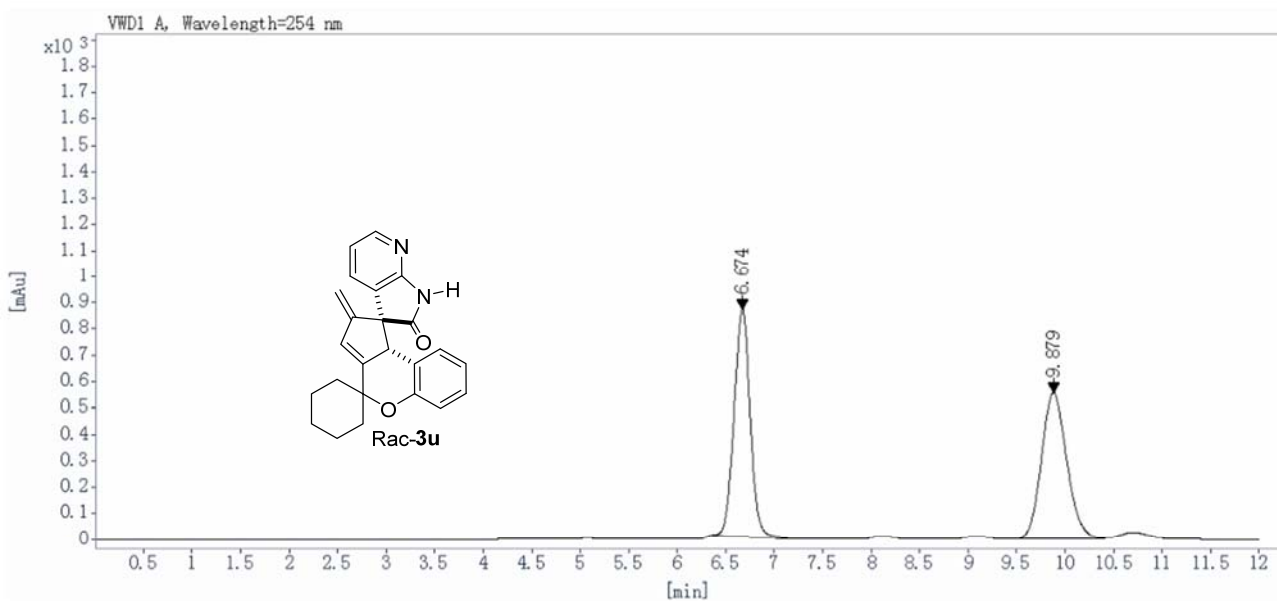

| Ret Time [min] | Peak Type | Width [min] | Height [mAU] | Area [mAU*s] | Area [%] |
|----------------|-----------|-------------|--------------|--------------|----------|
| 6.674          | BBA       | 0.18        | 864.6375     | 10019.2031   | 49.9140  |
| 9.879          | BB        | 0.28        | 553.8257     | 10053.7139   | 50.0860  |
| Totals:        |           |             |              | 20072.9170   | 100.0000 |

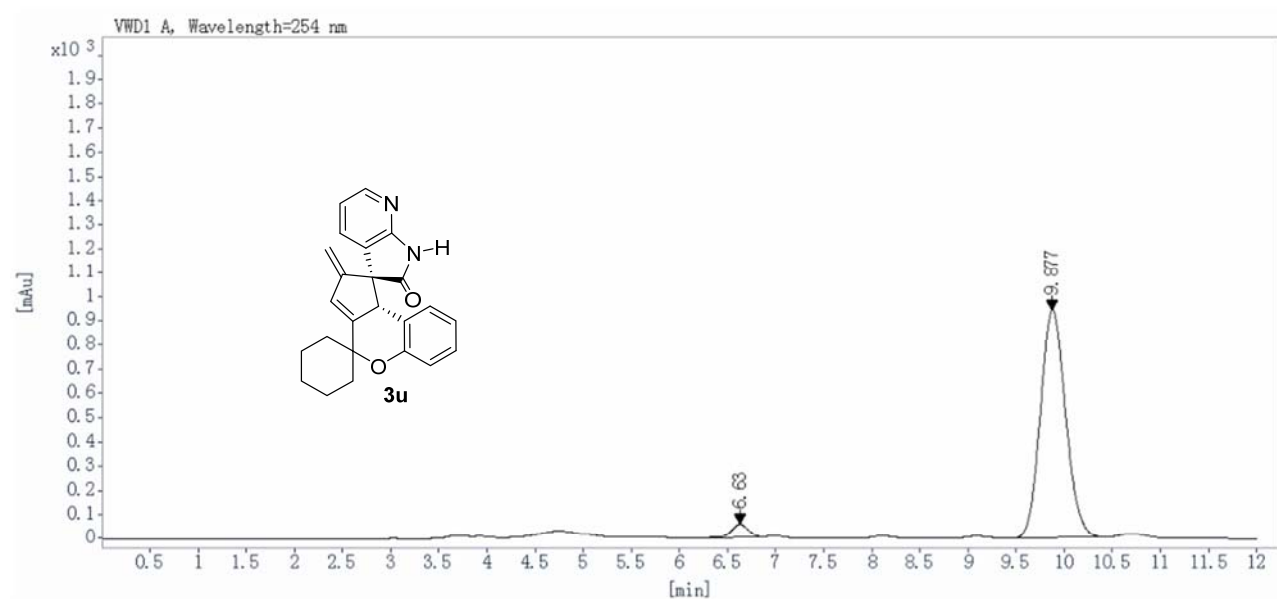

| Ret Time [min] | Peak Type | Width [min] | Height [mAU] | Area [mAU*s] | Area [%] |
|----------------|-----------|-------------|--------------|--------------|----------|
| 6.630          | BB        | 0.18        | 54.6443      | 641.9444     | 3.5939   |
| 9.877          | BB        | 0.29        | 940.9167     | 17220.1152   | 96.4061  |
| Totals:        |           |             |              | 17862.0596   | 100.0000 |

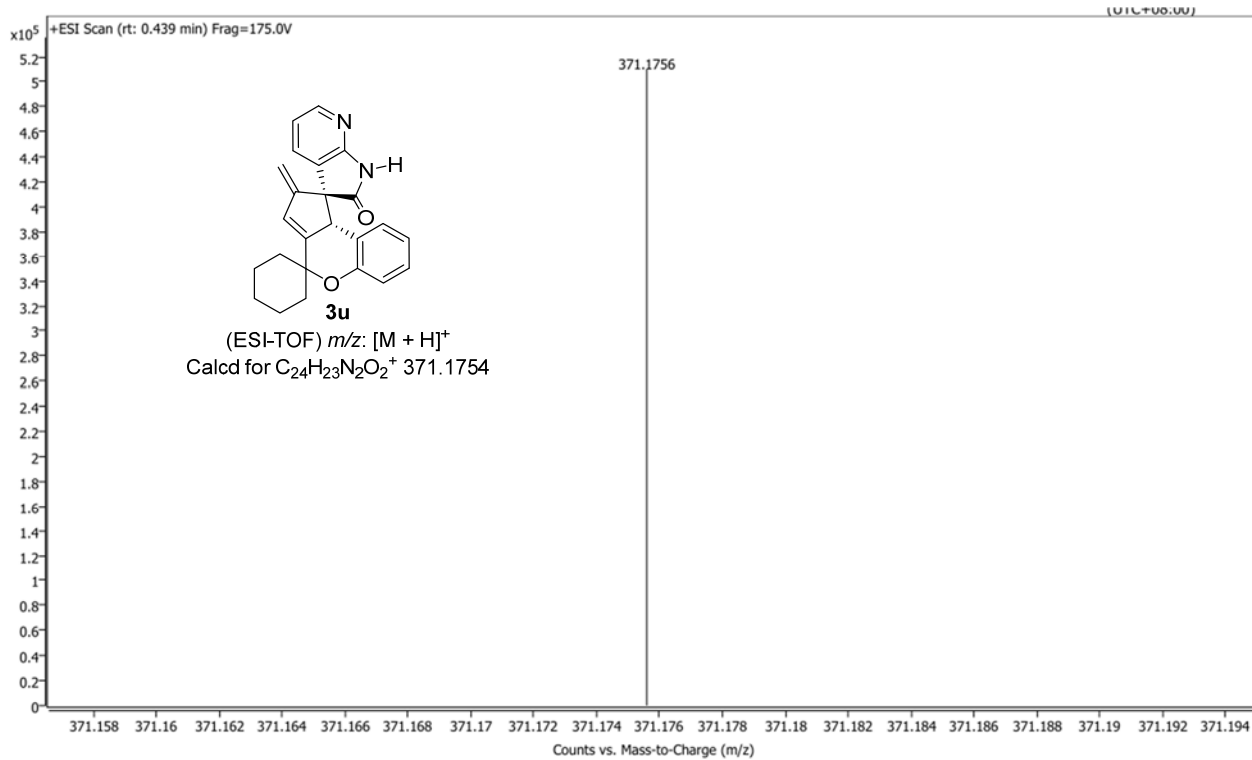

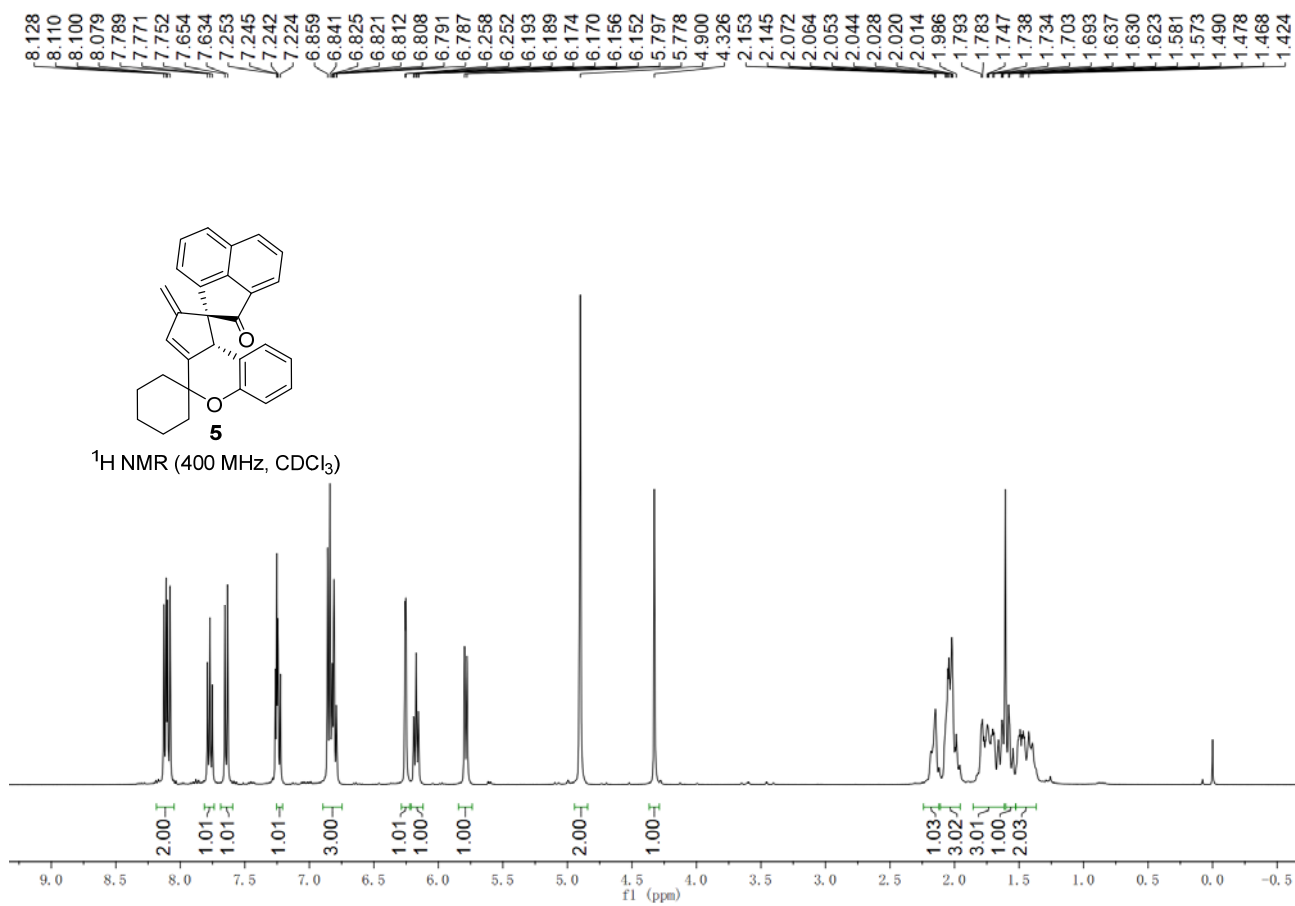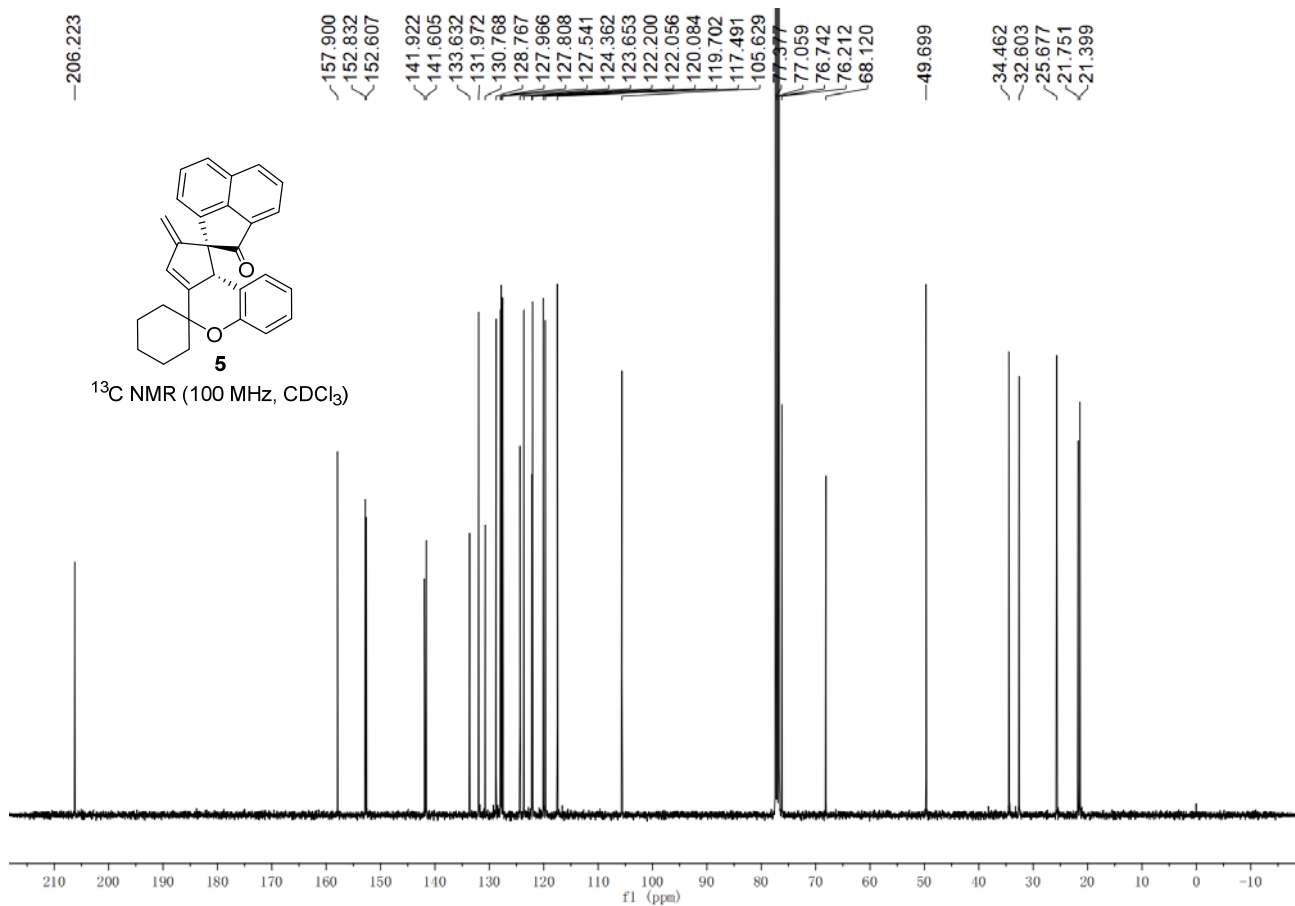

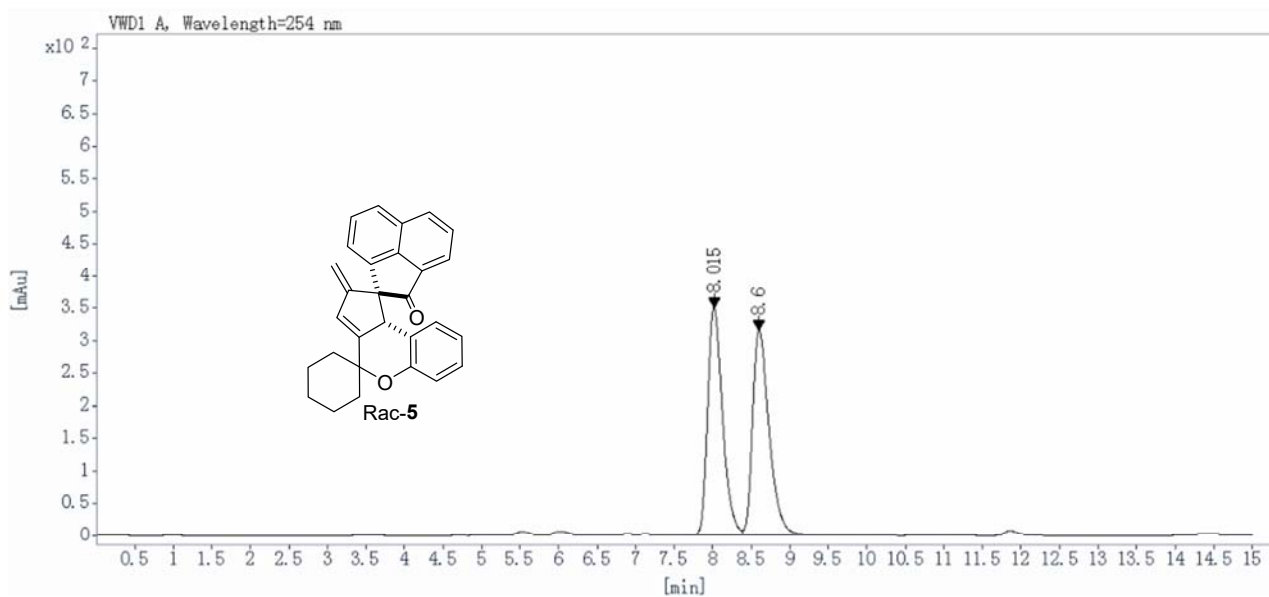

| Ret Time [min] | Peak Type | Width [min] | Height [mAU] | Area [mAU*s] | Area [%] |
|----------------|-----------|-------------|--------------|--------------|----------|
| 8.015          | BV        | 0.21        | 350.7008     | 4718.6255    | 49.9323  |
| 8.600          | VBA       | 0.23        | 315.7699     | 4731.4258    | 50.0677  |
| Totals:        |           |             |              | 9450.0513    | 100.0000 |

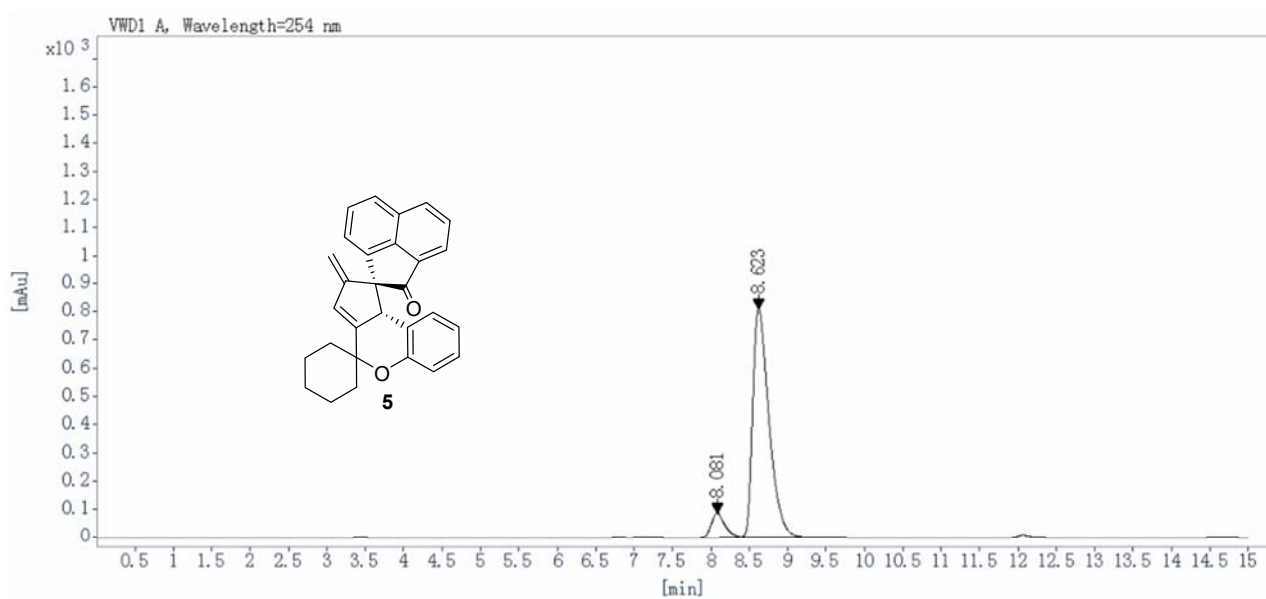

| Ret Time [min] | Peak Type | Width [min] | Height [mAU] | Area [mAU*s] | Area [%] |
|----------------|-----------|-------------|--------------|--------------|----------|
| 8.081          | BV        | 0.19        | 86.4970      | 1072.3313    | 8.3051   |
| 8.623          | VBA       | 0.22        | 809.1938     | 11839.3779   | 91.6949  |
| Totals:        |           |             |              | 12911.7092   | 100.0000 |

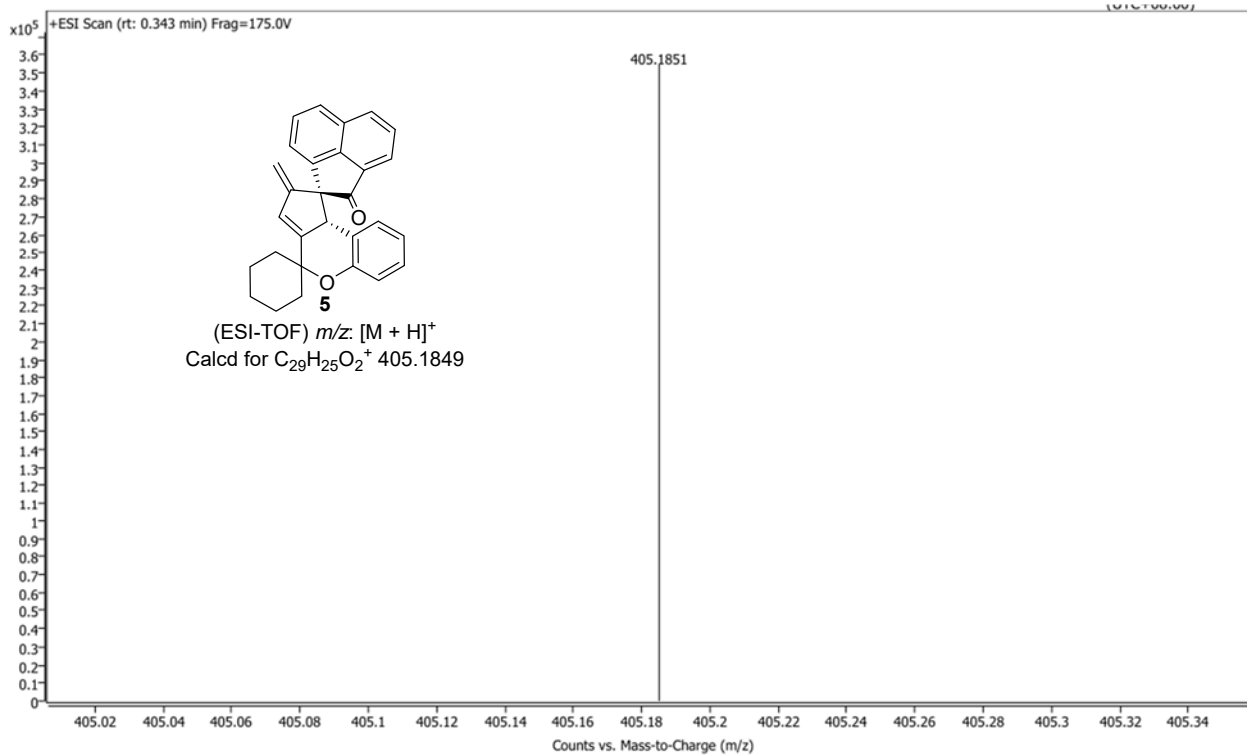

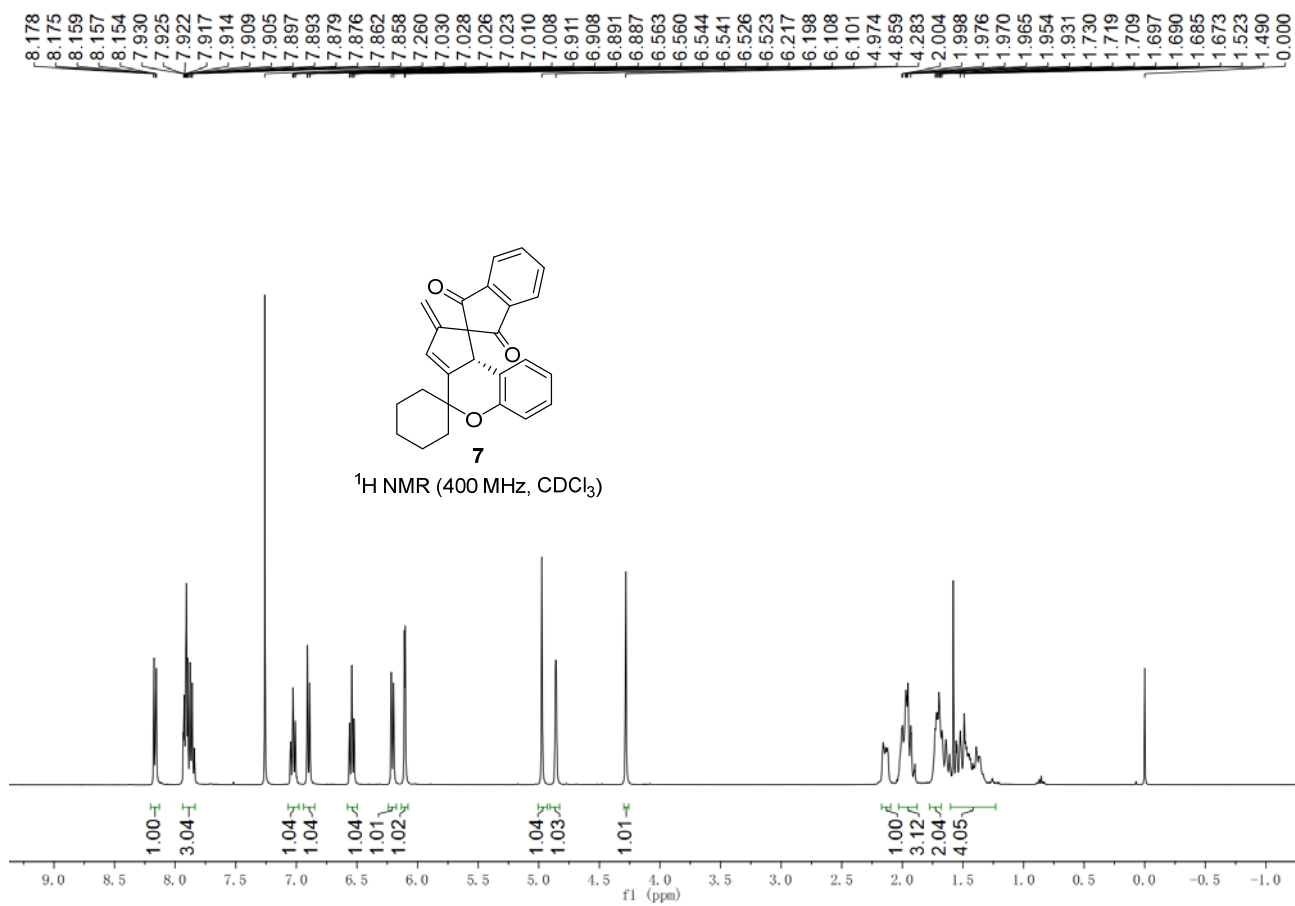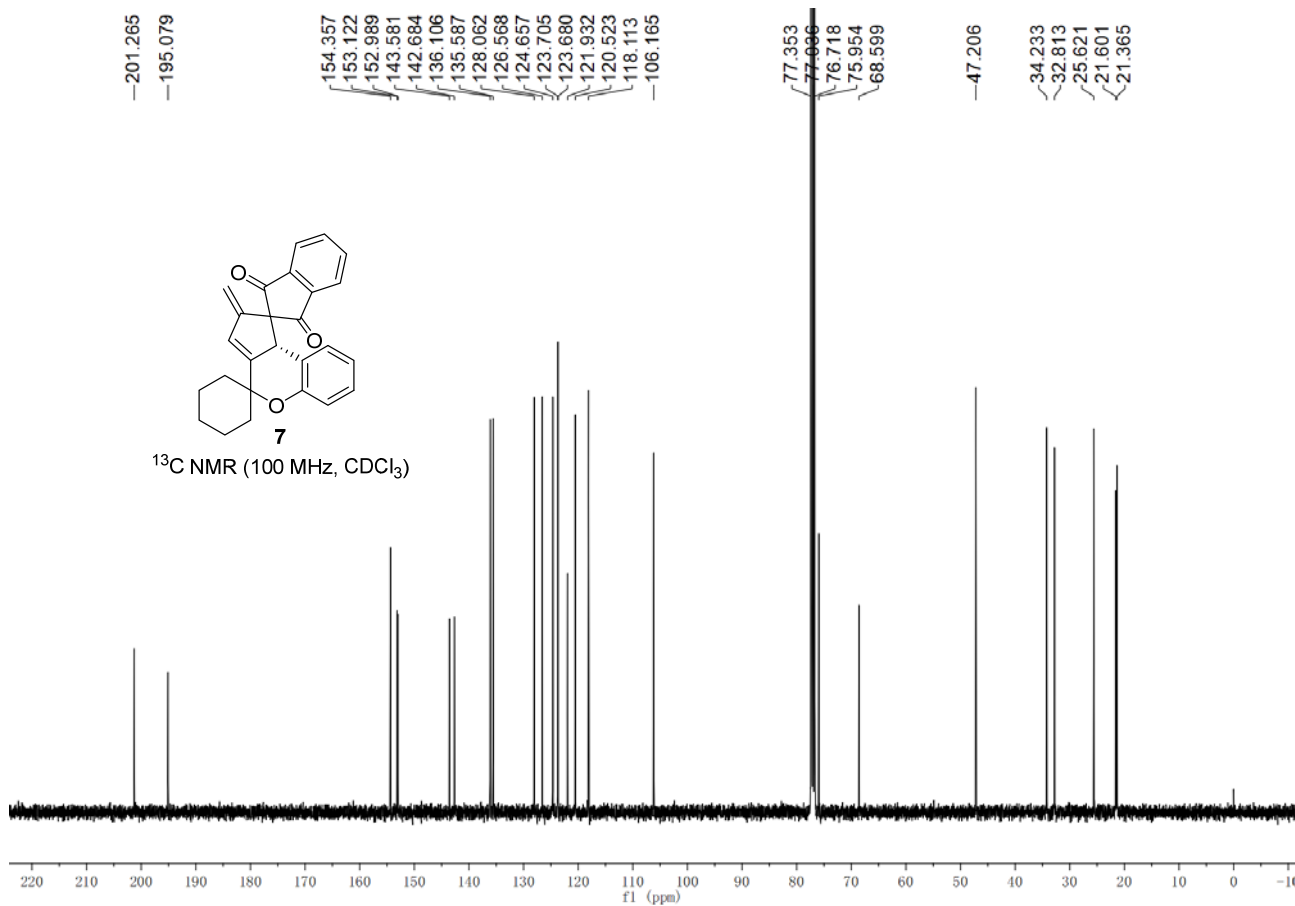

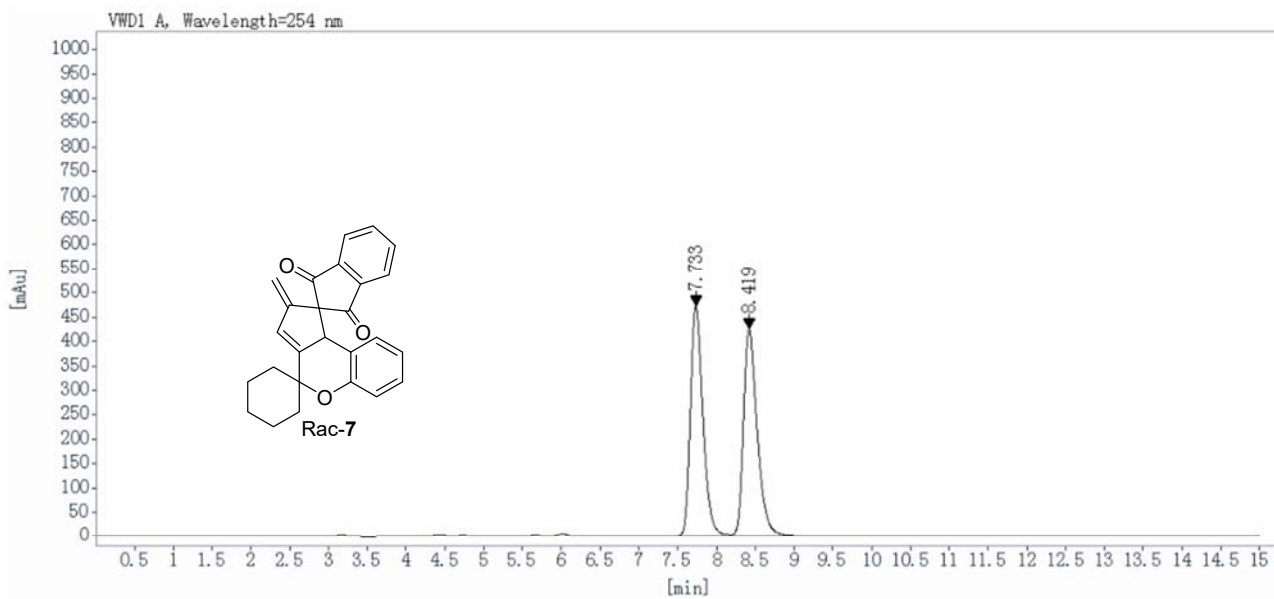

| Ret Time [min] | Peak Type | Width [min] | Height [mAU] | Area [mAU*s] | Area [%] |
|----------------|-----------|-------------|--------------|--------------|----------|
| 7.733          | BV        | 0.17        | 471.3006     | 5264.4287    | 50.0551  |
| 8.419          | VBA       | 0.19        | 425.1812     | 5252.8433    | 49.9449  |
| Totals:        |           |             |              | 10517.2720   | 100.0000 |

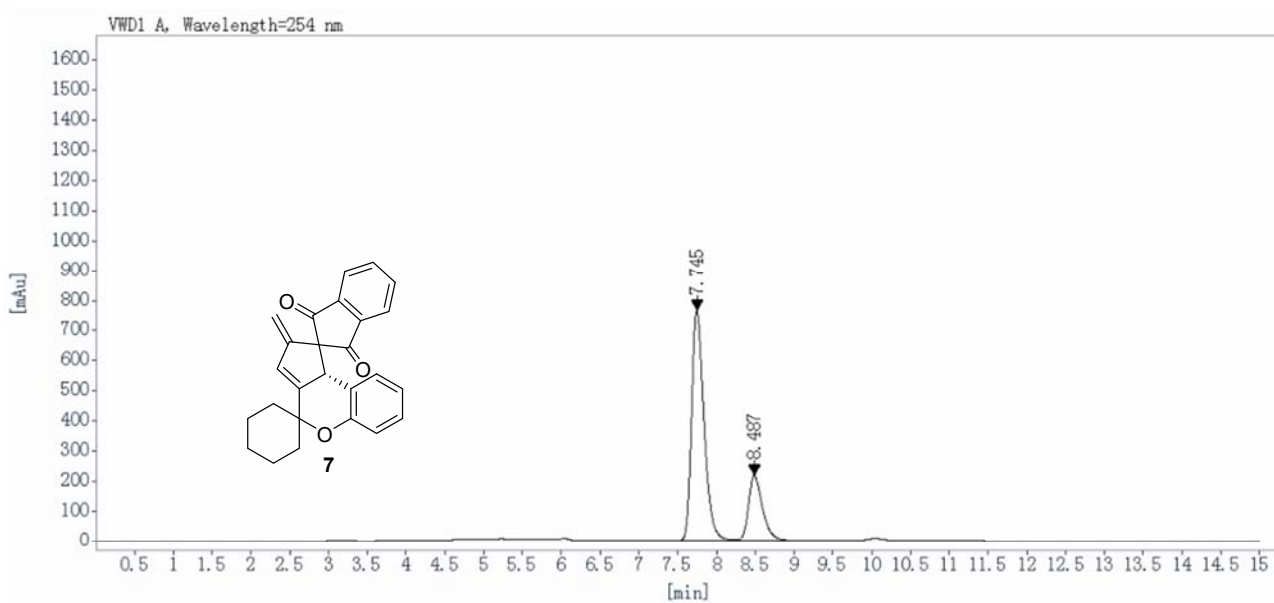

| Ret Time [min] | Peak Type | Width [min] | Height [mAU] | Area [mAU*s] | Area [%] |
|----------------|-----------|-------------|--------------|--------------|----------|
| 7.745          | BV        | 0.17        | 764.2188     | 8462.1875    | 75.5785  |
| 8.487          | VBA       | 0.19        | 217.0580     | 2734.3687    | 24.4215  |
| Totals:        |           |             |              | 11196.5562   | 100.0000 |

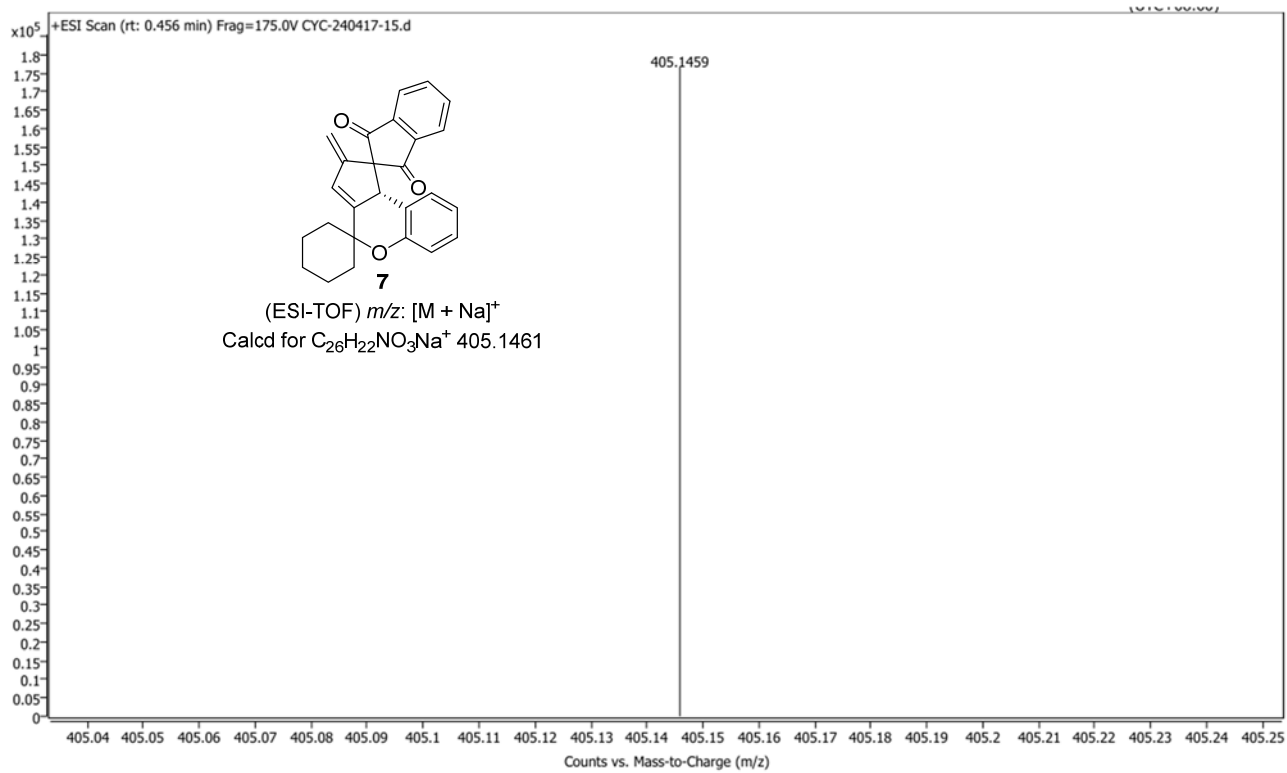



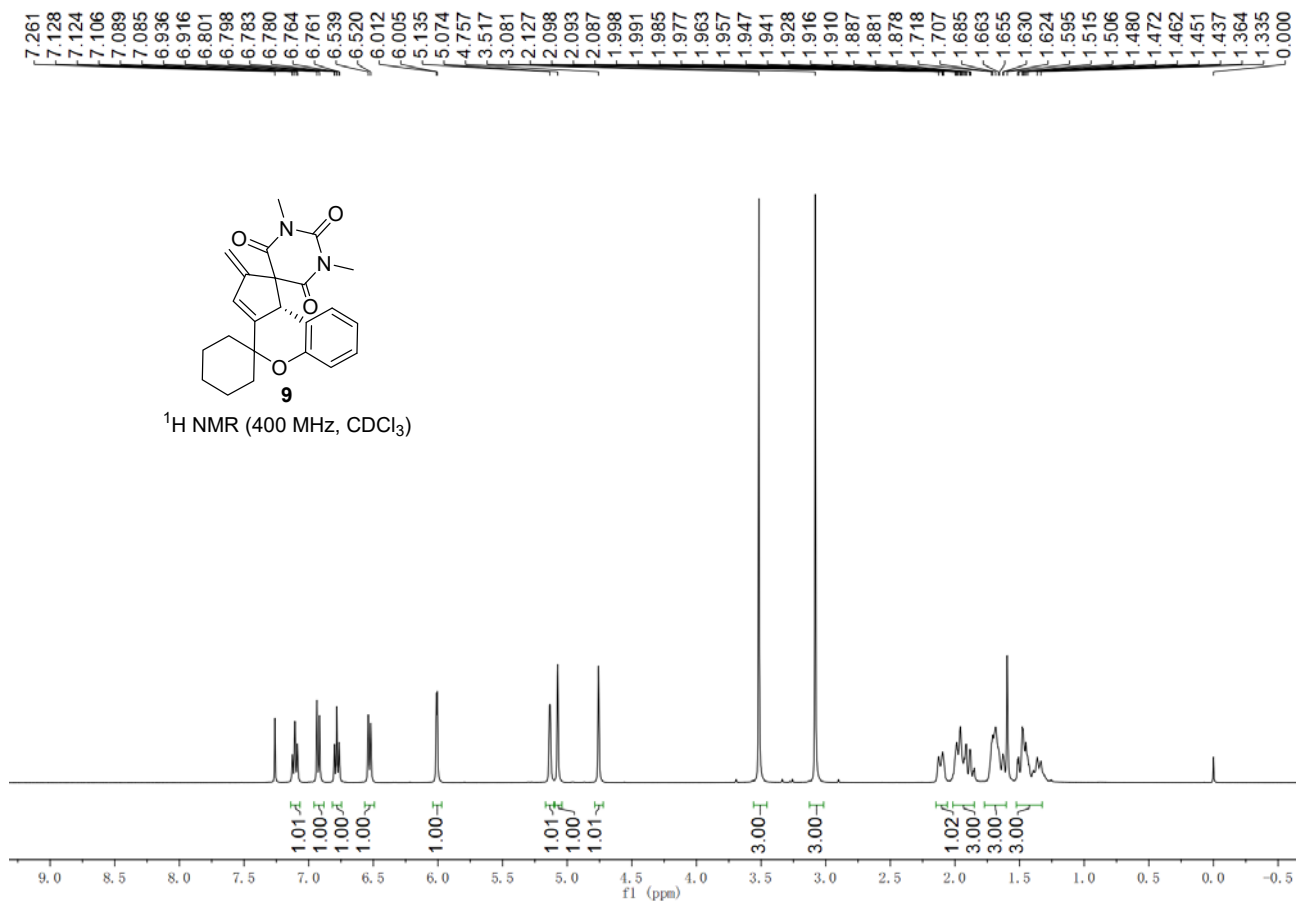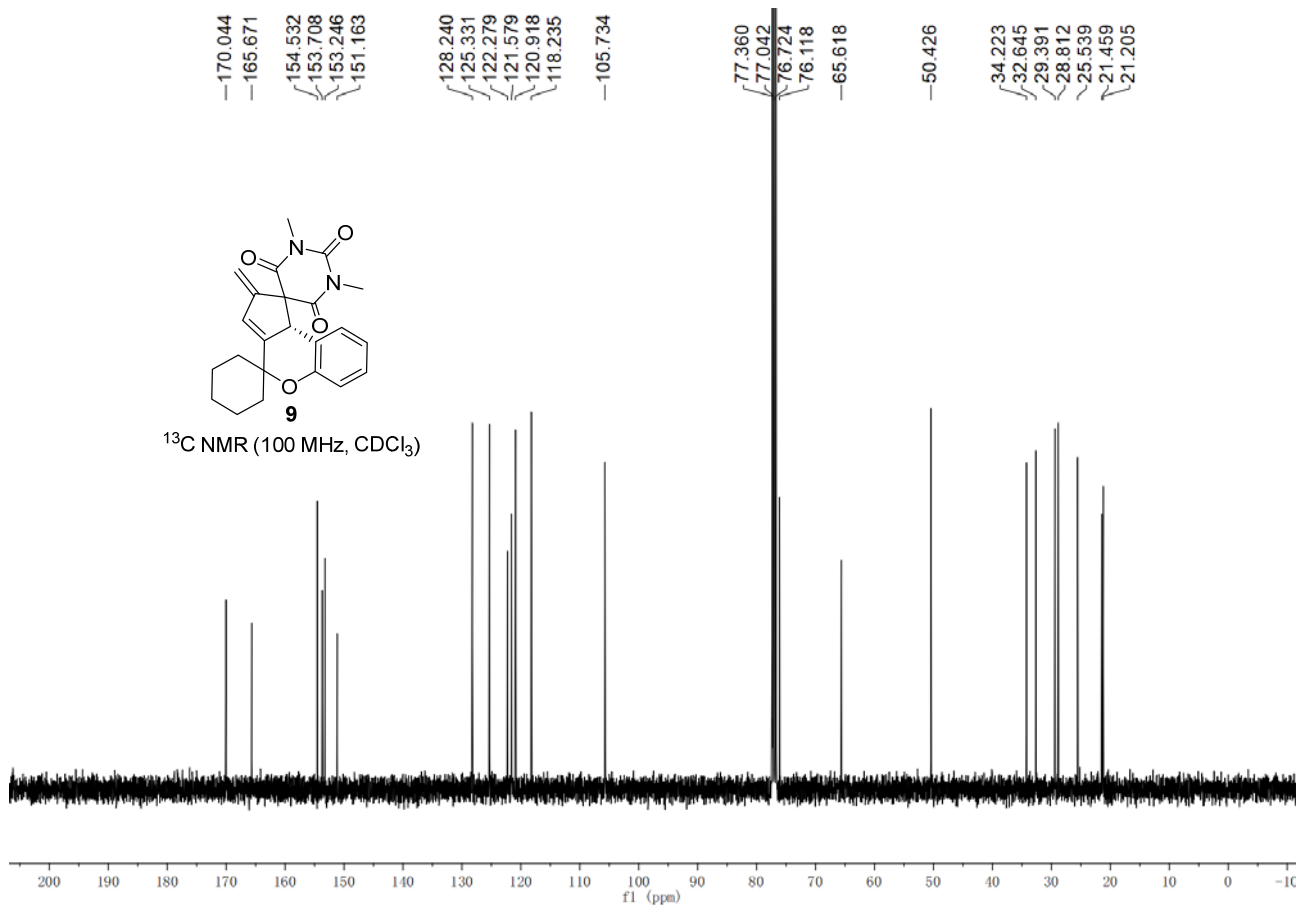

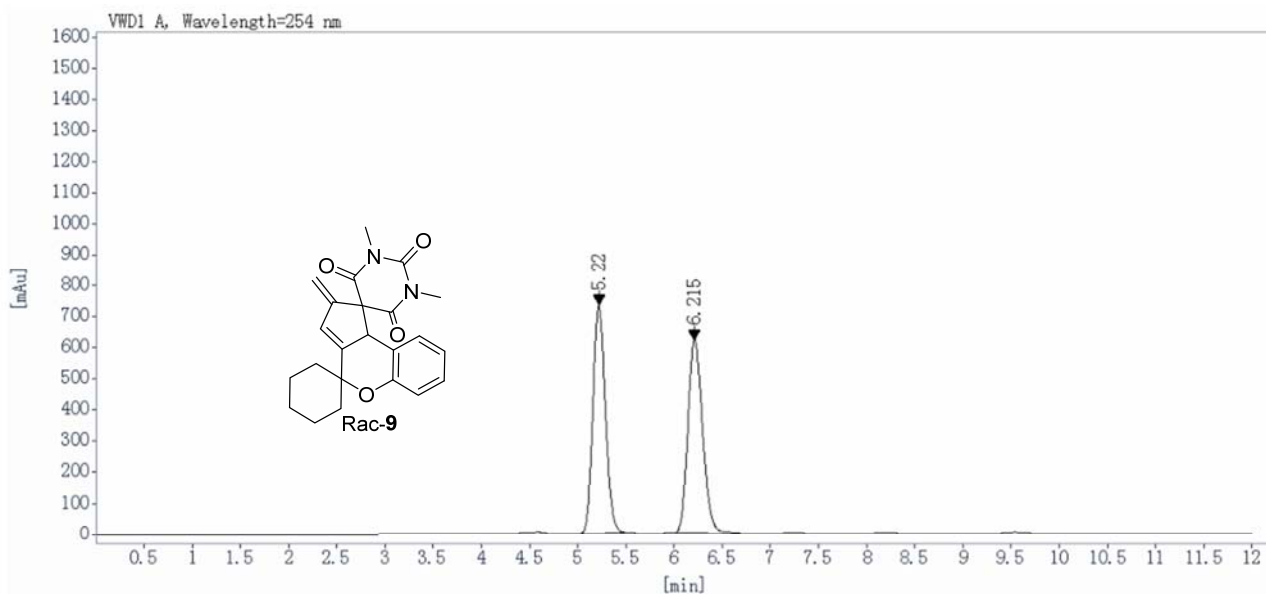

| Ret Time [min] | Peak Type | Width [min] | Height [mAU] | Area [mAU*s] | Area [%] |
|----------------|-----------|-------------|--------------|--------------|----------|
| 5.220          | BBA       | 0.14        | 733.8380     | 6613.3145    | 49.8825  |
| 6.215          | BBA       | 0.17        | 622.2565     | 6644.4639    | 50.1175  |
| Totals:        |           |             |              | 13257.7783   | 100.0000 |

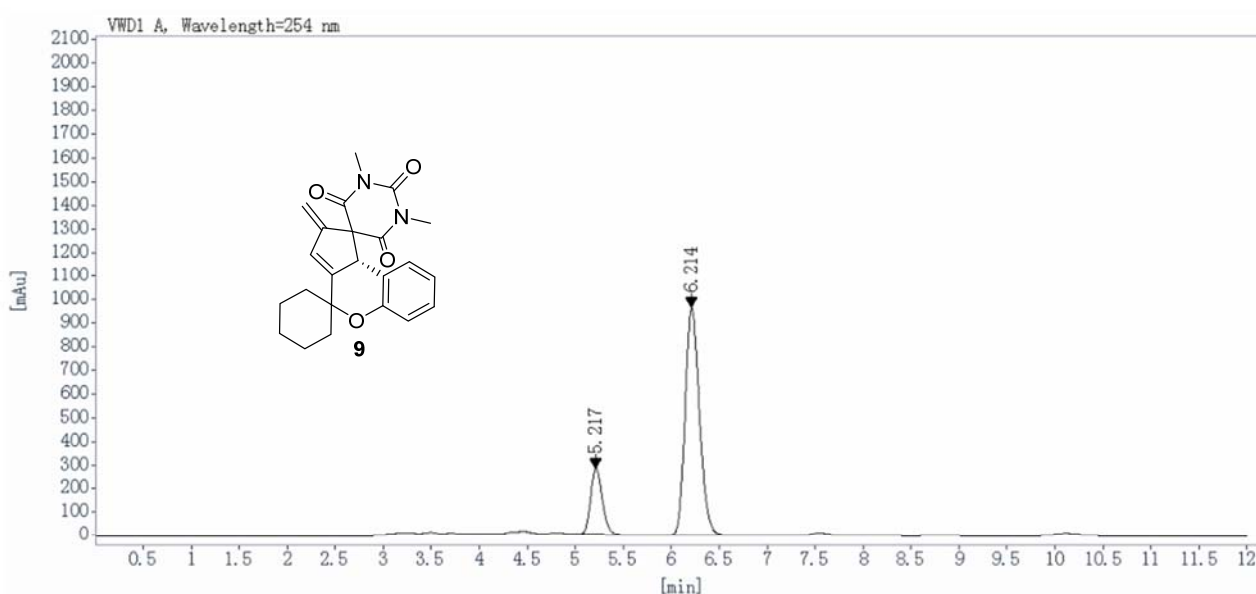

| Ret Time [min] | Peak Type | Width [min] | Height [mAU] | Area [mAU*s] | Area [%] |
|----------------|-----------|-------------|--------------|--------------|----------|
| 5.217          | BBA       | 0.13        | 283.1979     | 2408.3604    | 19.3641  |
| 6.214          | BBA       | 0.16        | 961.2004     | 10028.8535   | 80.6359  |
| Totals:        |           |             |              | 12437.2139   | 100.0000 |

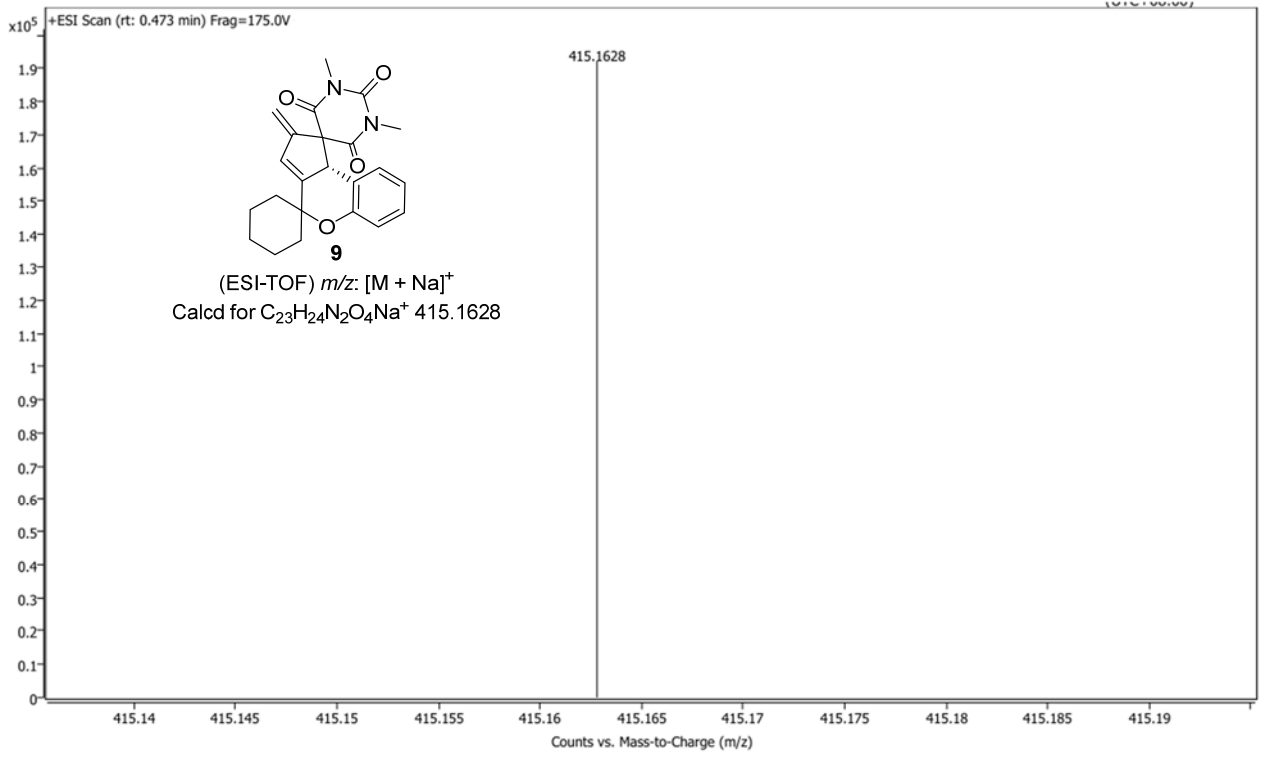

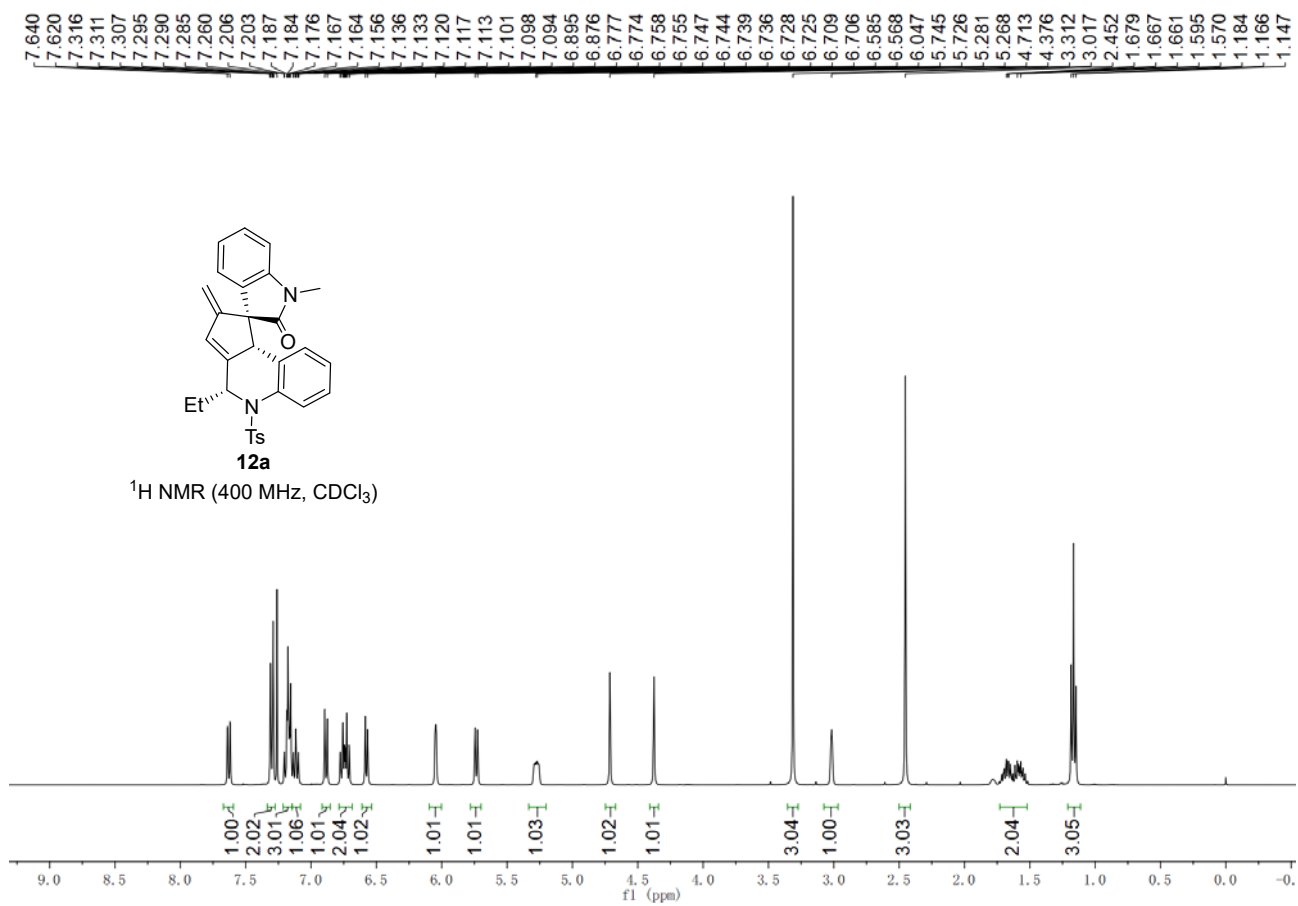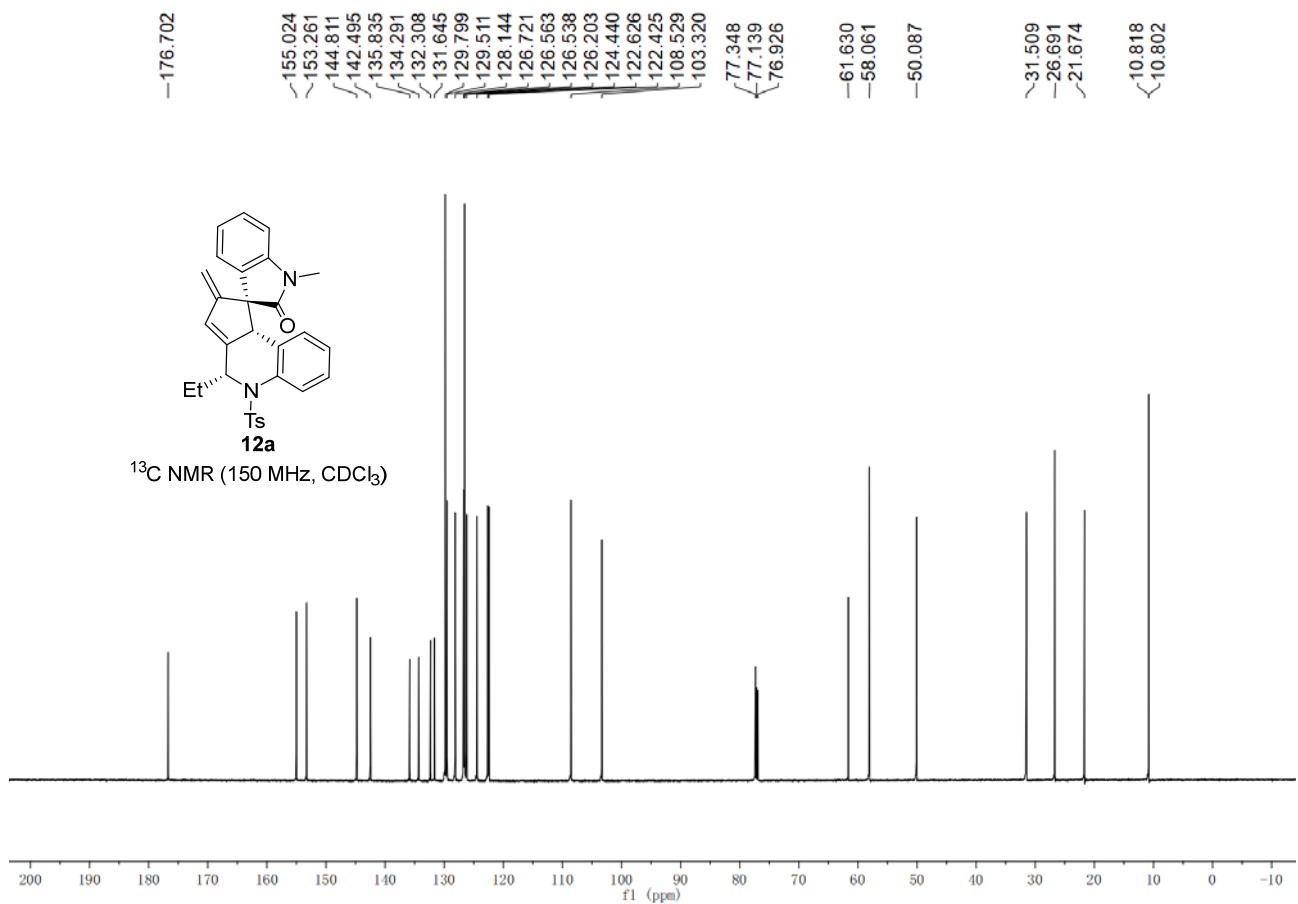

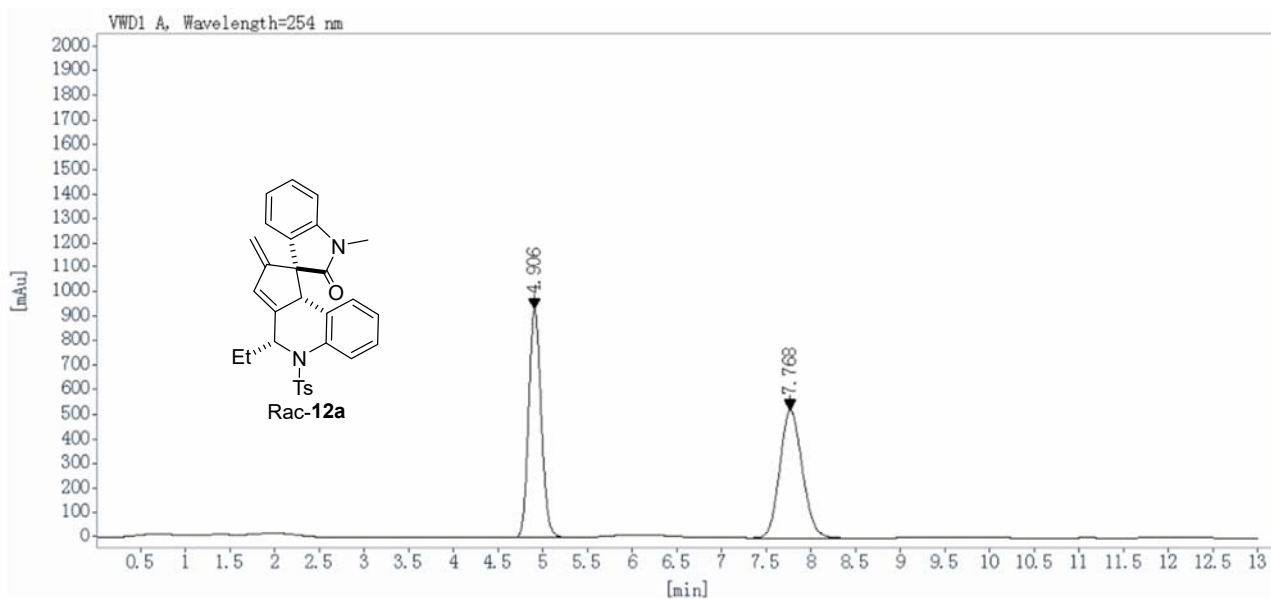

| Ret Time [min] | Peak Type | Width [min] | Height [mAU] | Area [mAU*s] | Area [%] |
|----------------|-----------|-------------|--------------|--------------|----------|
| 4.906          | BBA       | 0.15        | 935.4191     | 9221.7646    | 49.9052  |
| 7.768          | BBA       | 0.28        | 524.1456     | 9256.7979    | 50.0948  |
| Totals:        |           |             |              | 18478.5625   | 100.0000 |

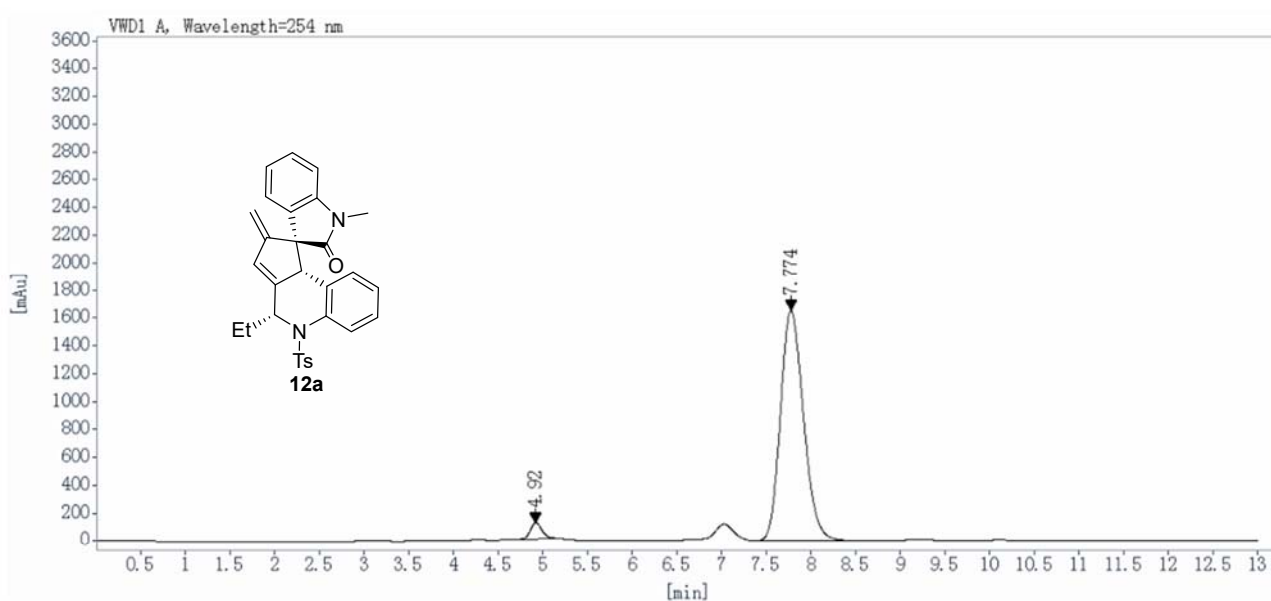

| Ret Time [min] | Peak Type | Width [min] | Height [mAU] | Area [mAU*s] | Area [%] |
|----------------|-----------|-------------|--------------|--------------|----------|
| 4.920          | BBA       | 0.14        | 117.5743     | 1106.3406    | 3.5979   |
| 7.774          | BBA       | 0.28        | 1648.6512    | 29643.4590   | 96.4021  |
| Totals:        |           |             |              | 30749.7996   | 100.0000 |

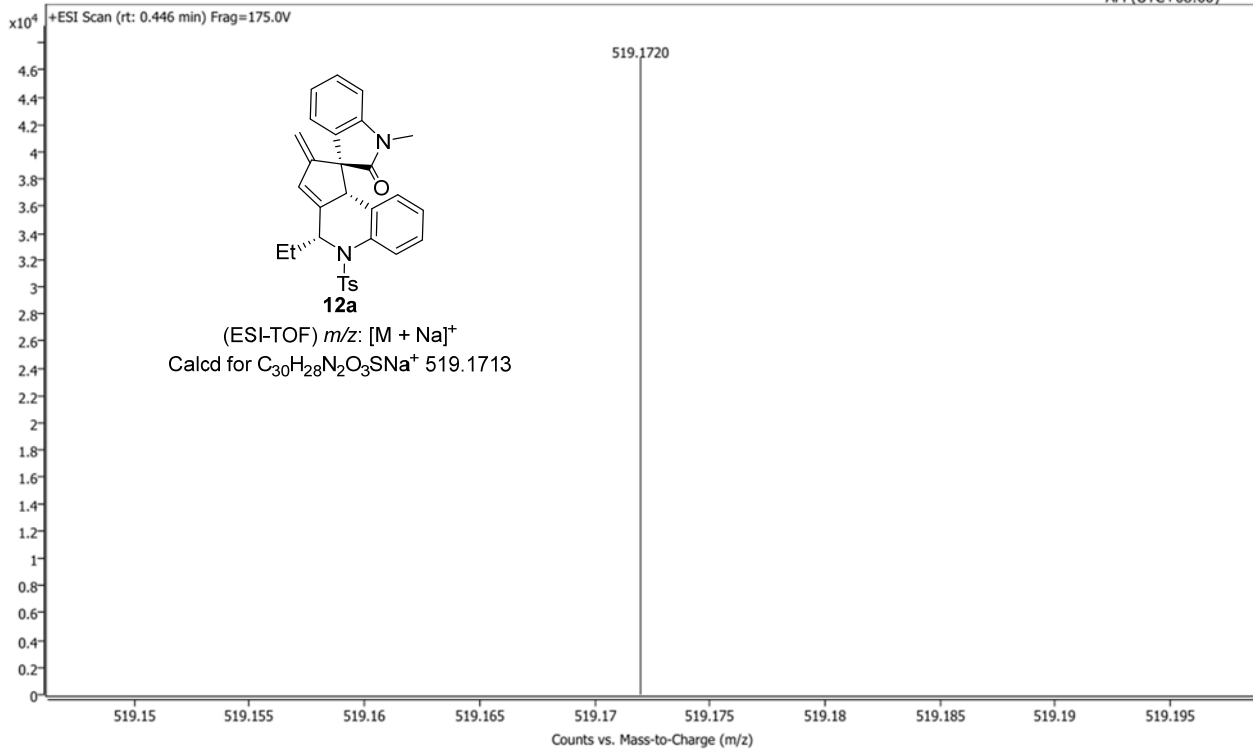

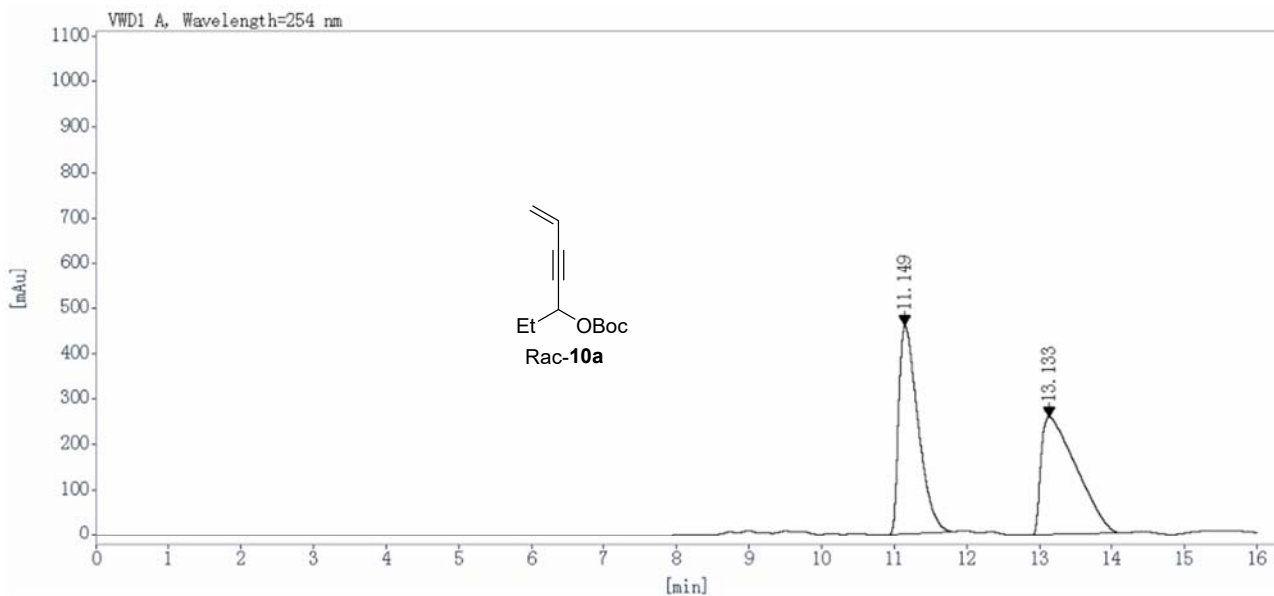

| Ret Time [min] | Peak Type | Width [min] | Height [mAU] | Area [mAU*s] | Area [%] |
|----------------|-----------|-------------|--------------|--------------|----------|
| 11.149         | BB        | 0.28        | 458.2355     | 8487.8613    | 49.3090  |
| 13.133         | BB        | 0.51        | 258.5074     | 8725.7383    | 50.6910  |
| Totals:        |           |             |              | 17213.5996   | 100.0000 |

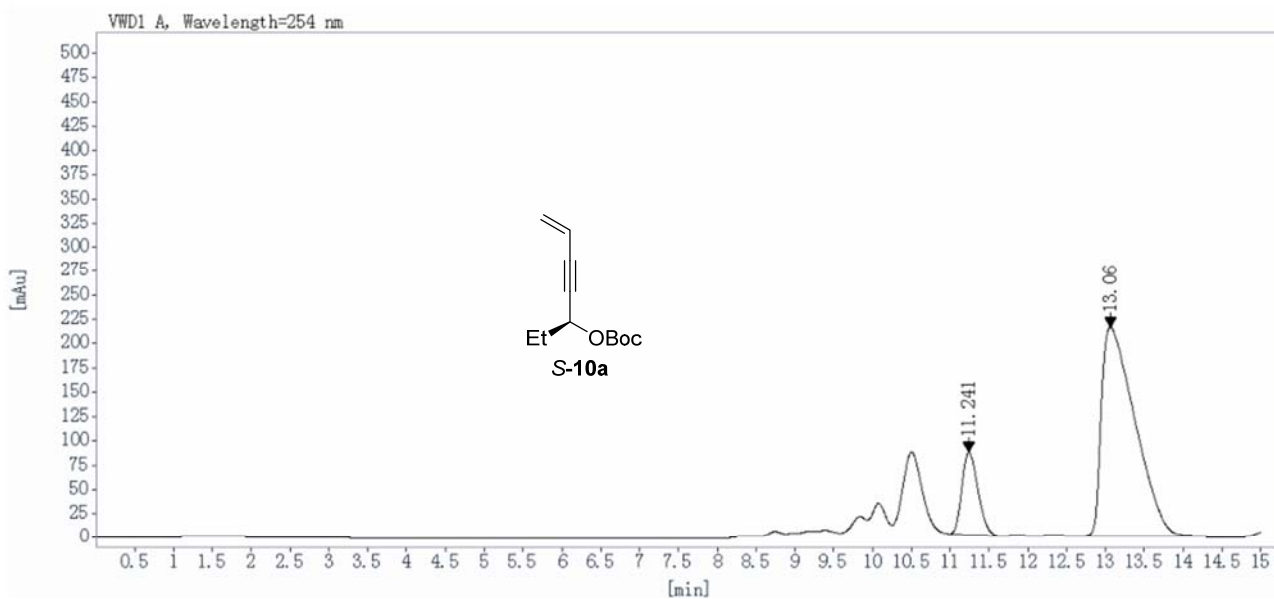

| Ret Time [min] | Peak Type | Width [min] | Height [mAU] | Area [mAU*s] | Area [%] |
|----------------|-----------|-------------|--------------|--------------|----------|
| 11.241         | BB        | 0.23        | 85.3246      | 1229.3444    | 15.9744  |
| 13.060         | BBA       | 0.47        | 215.0339     | 6466.3936    | 84.0256  |
| Totals:        |           |             |              | 7695.7379    | 100.0000 |

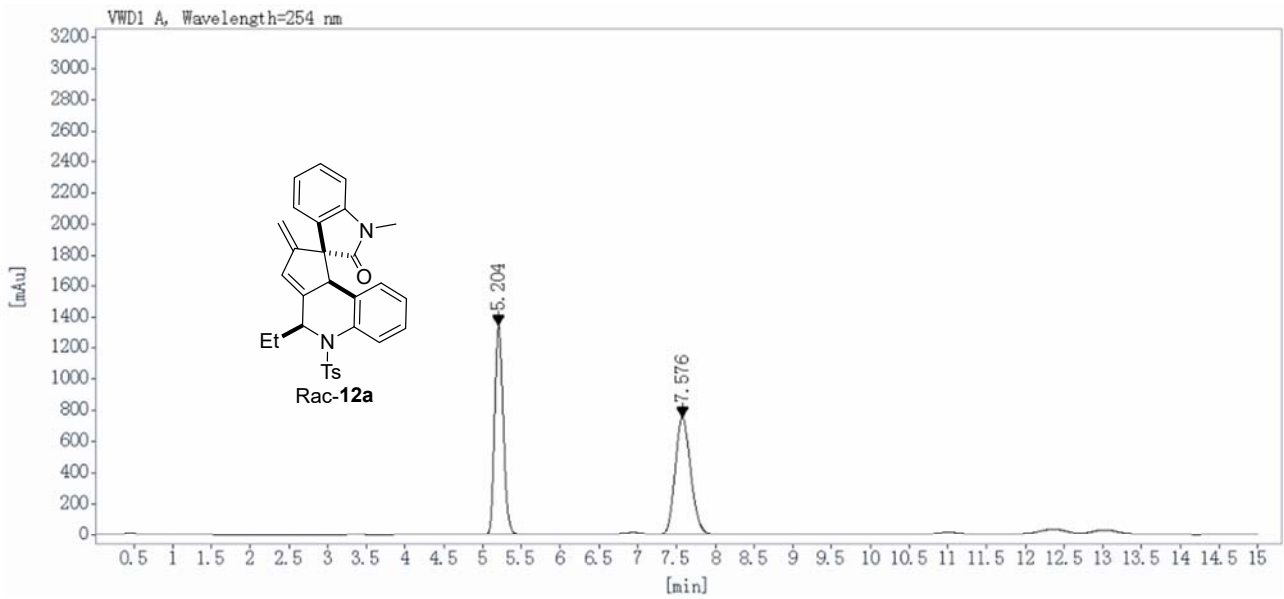

| Ret Time [min] | Peak Type | Width [min] | Height [mAU] | Area [mAU*s] | Area [%] |
|----------------|-----------|-------------|--------------|--------------|----------|
| 5.204          | BBA       | 0.12        | 1345.2666    | 10414.7266   | 49.8143  |
| 7.576          | BBA       | 0.22        | 752.3749     | 10492.3945   | 50.1857  |
| Totals:        |           |             |              | 20907.1211   | 100.0000 |

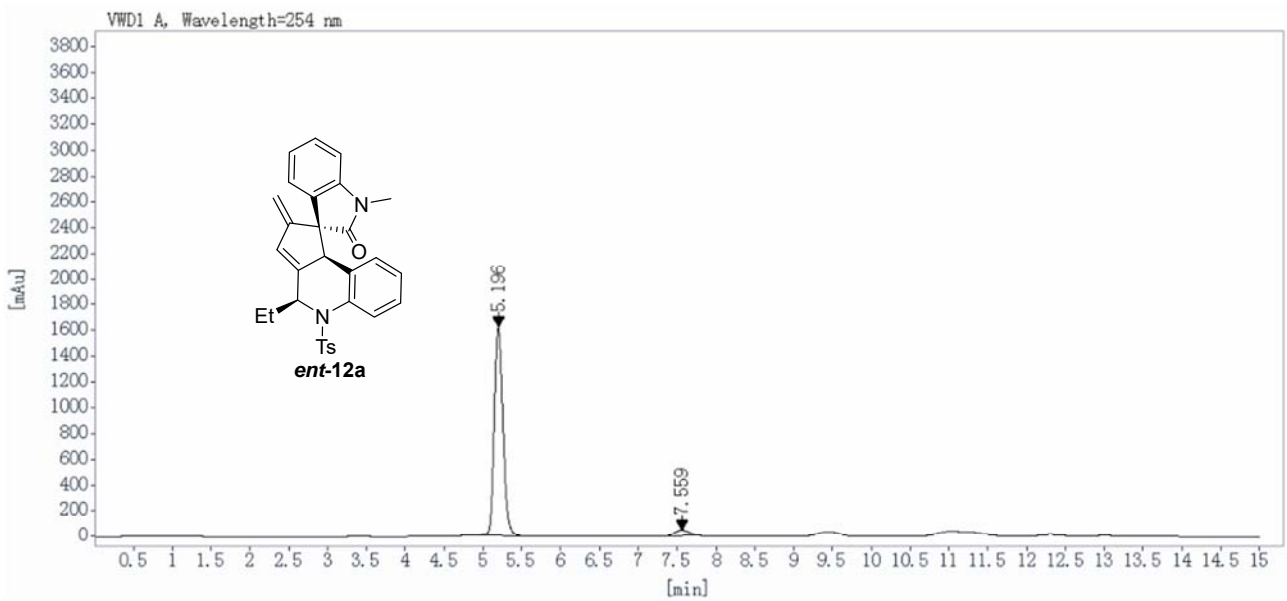

| Ret Time [min] | Peak Type | Width [min] | Height [mAU] | Area [mAU*s] | Area [%] |
|----------------|-----------|-------------|--------------|--------------|----------|
| 5.196          | BBA       | 0.12        | 1618.7483    | 12679.8691   | 95.4738  |
| 7.559          | BBA       | 0.20        | 46.7730      | 601.1260     | 4.5262   |
| Totals:        |           |             |              | 13280.9952   | 100.0000 |



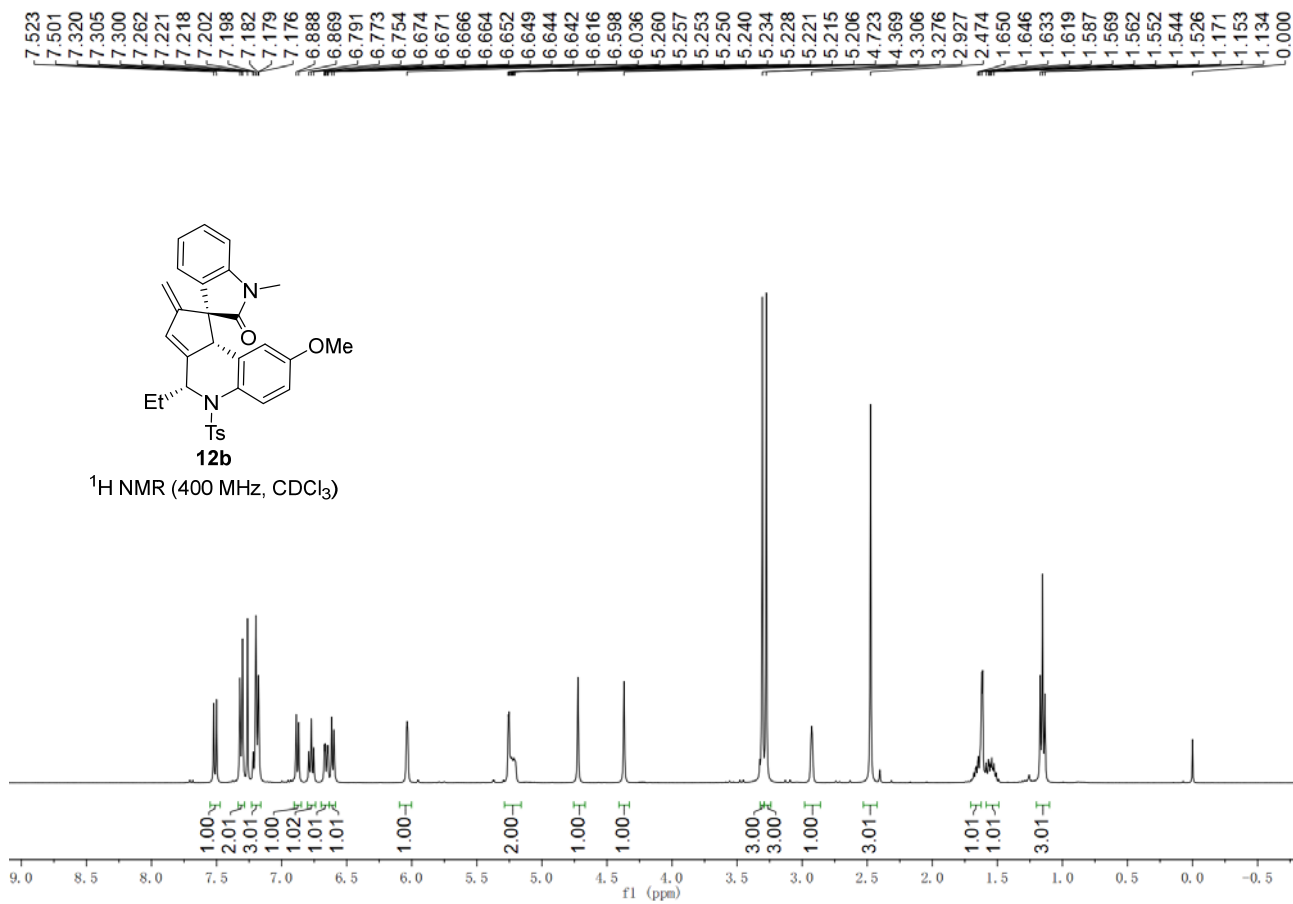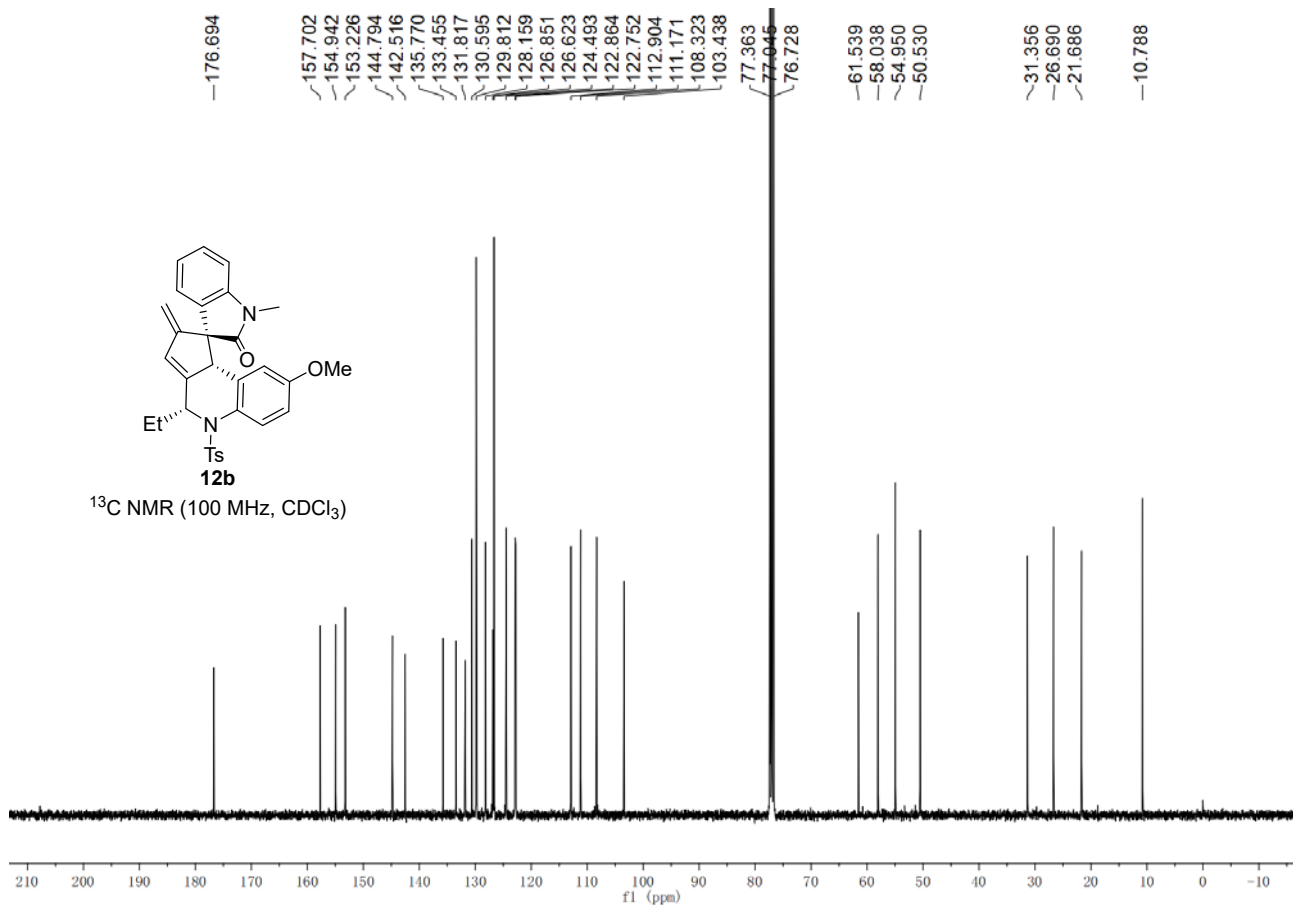

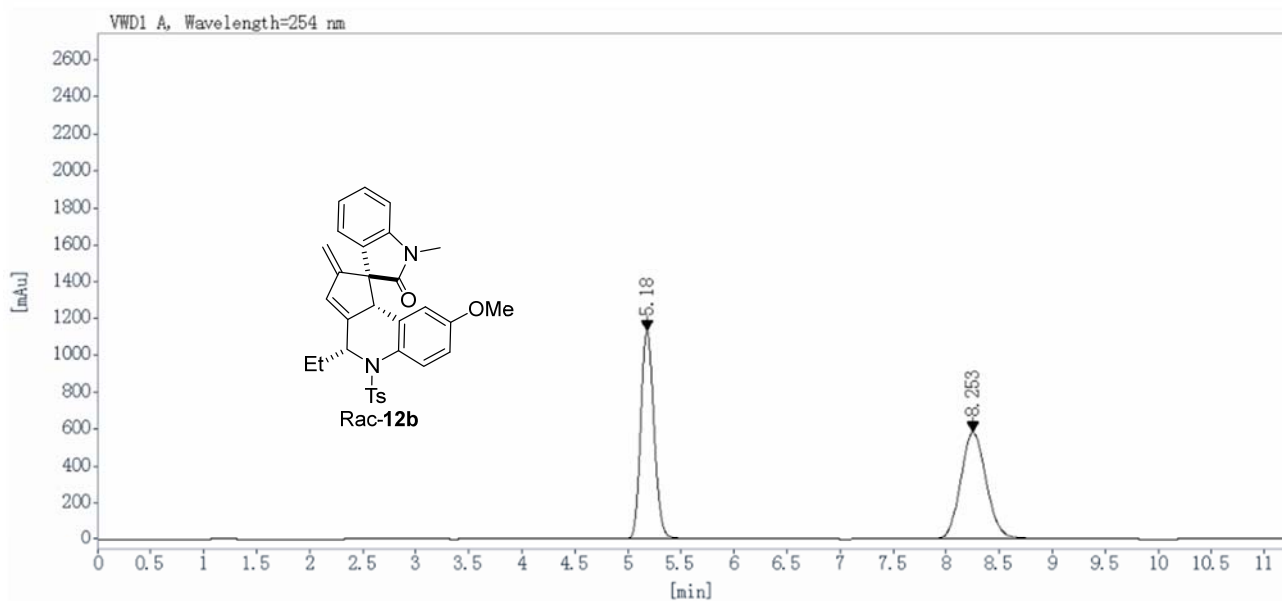

| Ret Time [min] | Peak Type | Width [min] | Height [mAU] | Area [mAU*s] | Area [%] |
|----------------|-----------|-------------|--------------|--------------|----------|
| 5.180          | BBA       | 0.13        | 1133.0798    | 9818.5264    | 49.8066  |
| 8.253          | BBA       | 0.26        | 580.9495     | 9894.7607    | 50.1934  |
| Totals:        |           |             |              | 19713.2871   | 100.0000 |

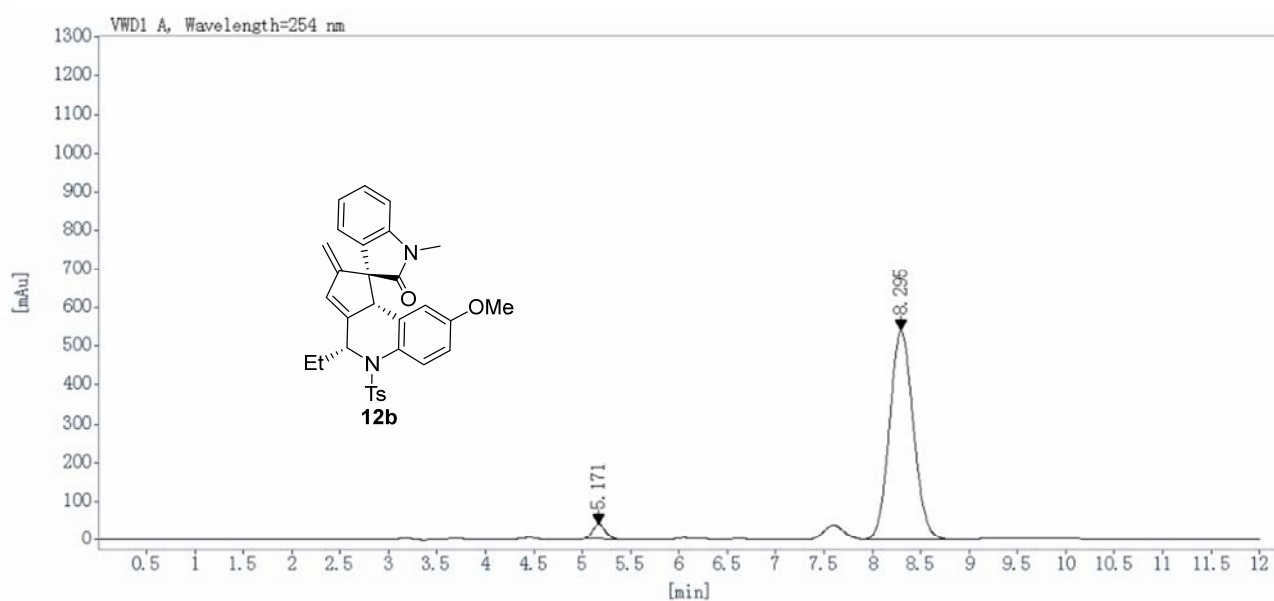

| Ret Time [min] | Peak Type | Width [min] | Height [mAU] | Area [mAU*s] | Area [%] |
|----------------|-----------|-------------|--------------|--------------|----------|
| 5.171          | BBA       | 0.14        | 38.6503      | 352.1087     | 3.6790   |
| 8.295          | BBA       | 0.27        | 538.2534     | 9218.6953    | 96.3210  |
| Totals:        |           |             |              | 9570.8040    | 100.0000 |

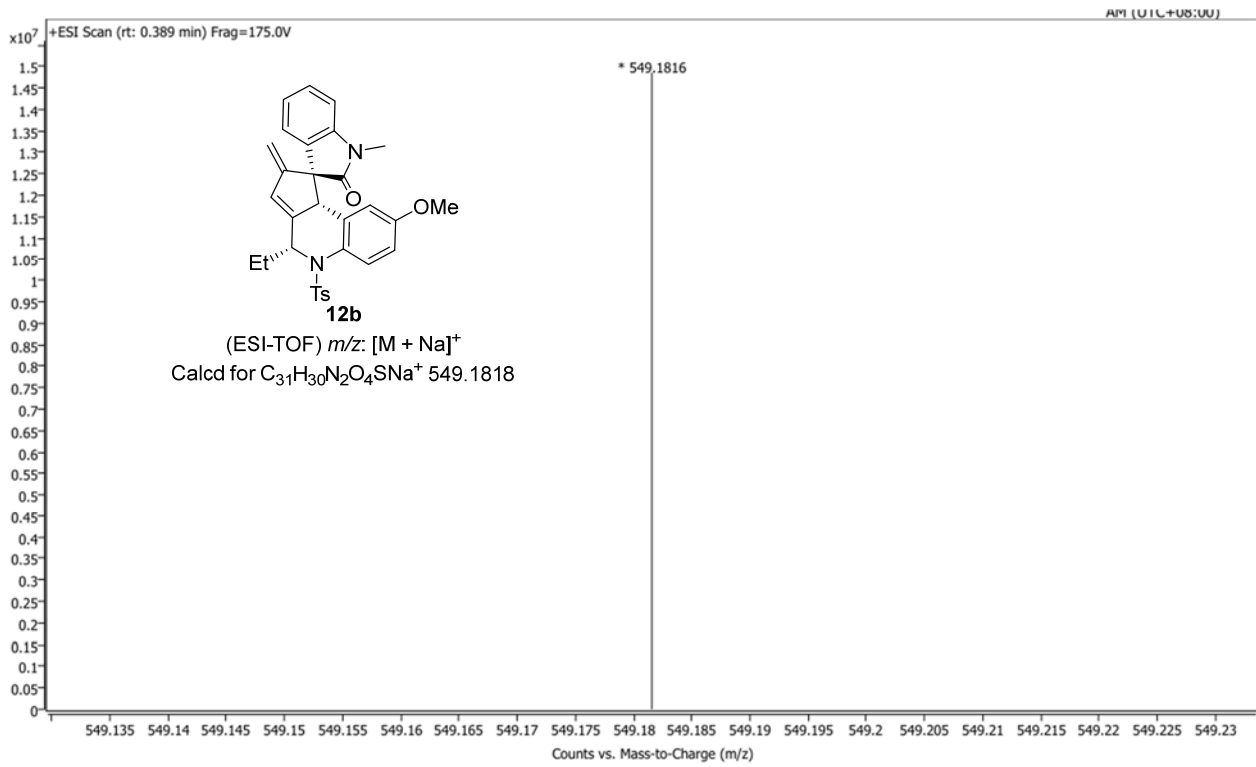

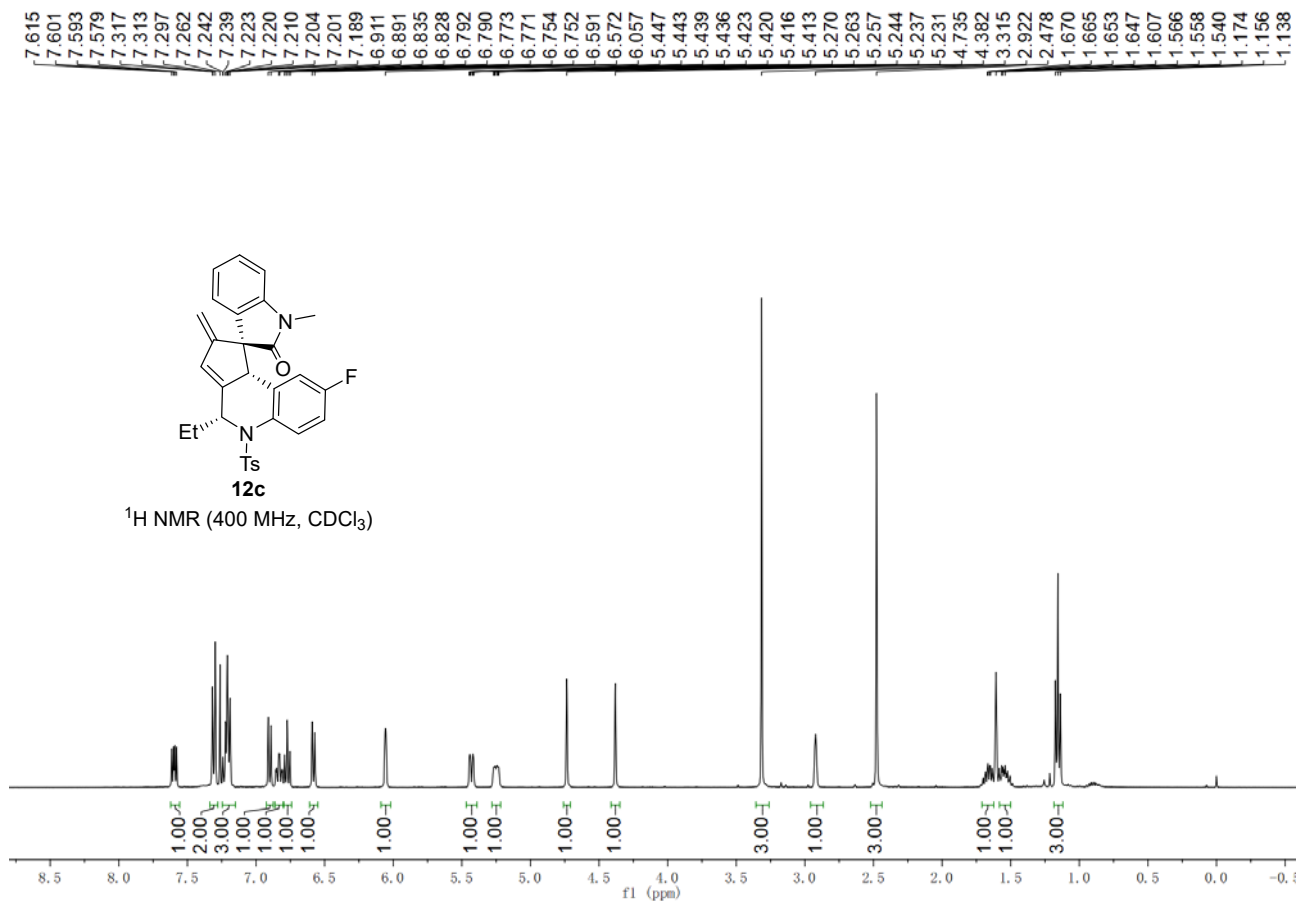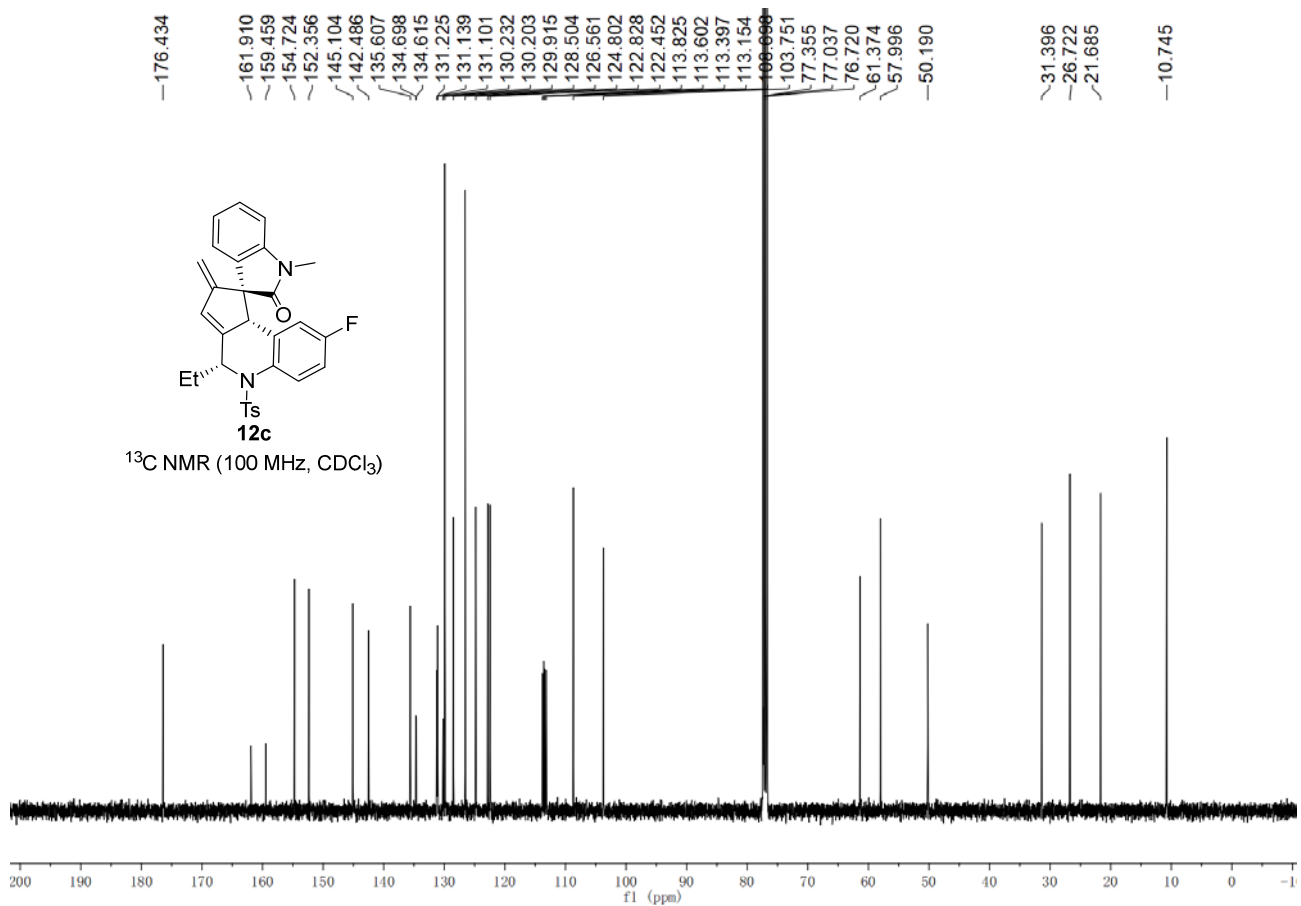

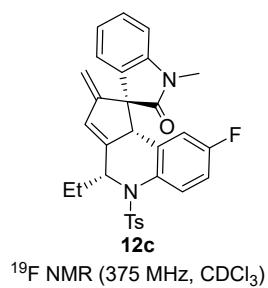

113.617

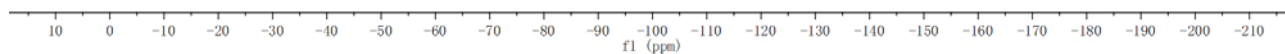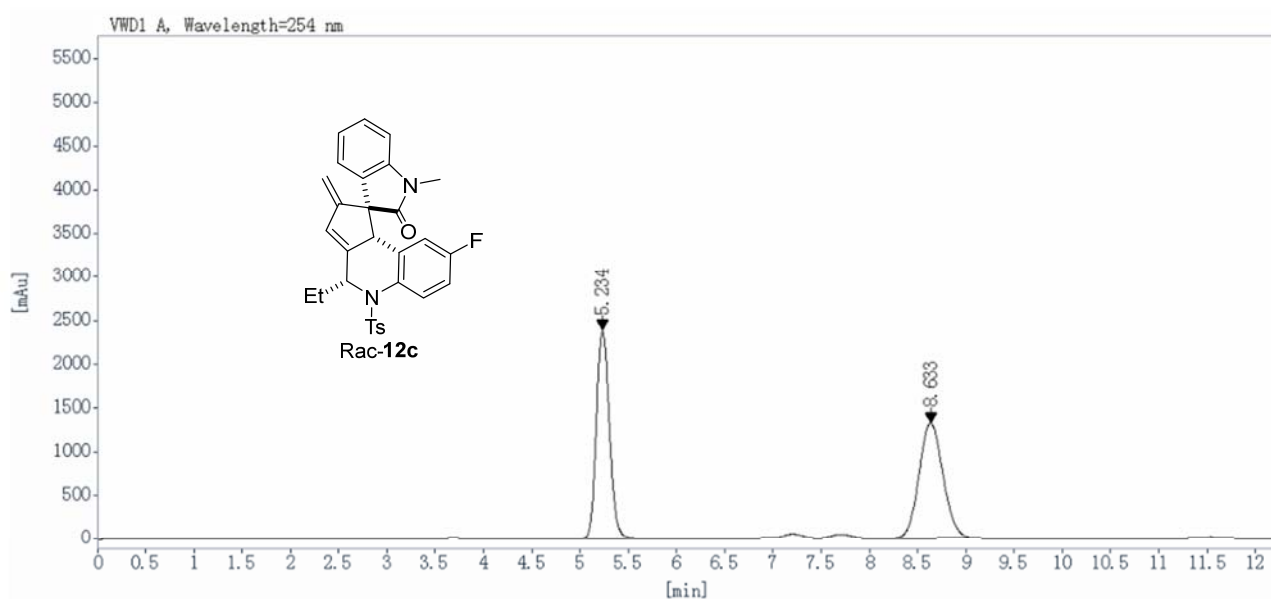

| Ret Time [min] | Peak Type | Width [min] | Height [mAU] | Area [mAU*s] | Area [%] |
|----------------|-----------|-------------|--------------|--------------|----------|
| 5.234          | BBA       | 0.15        | 2381.8638    | 22391.8848   | 49.2868  |
| 8.633          | BBA       | 0.27        | 1325.9989    | 23039.9160   | 50.7132  |
| Totals:        |           |             |              | 45431.8008   | 100.0000 |

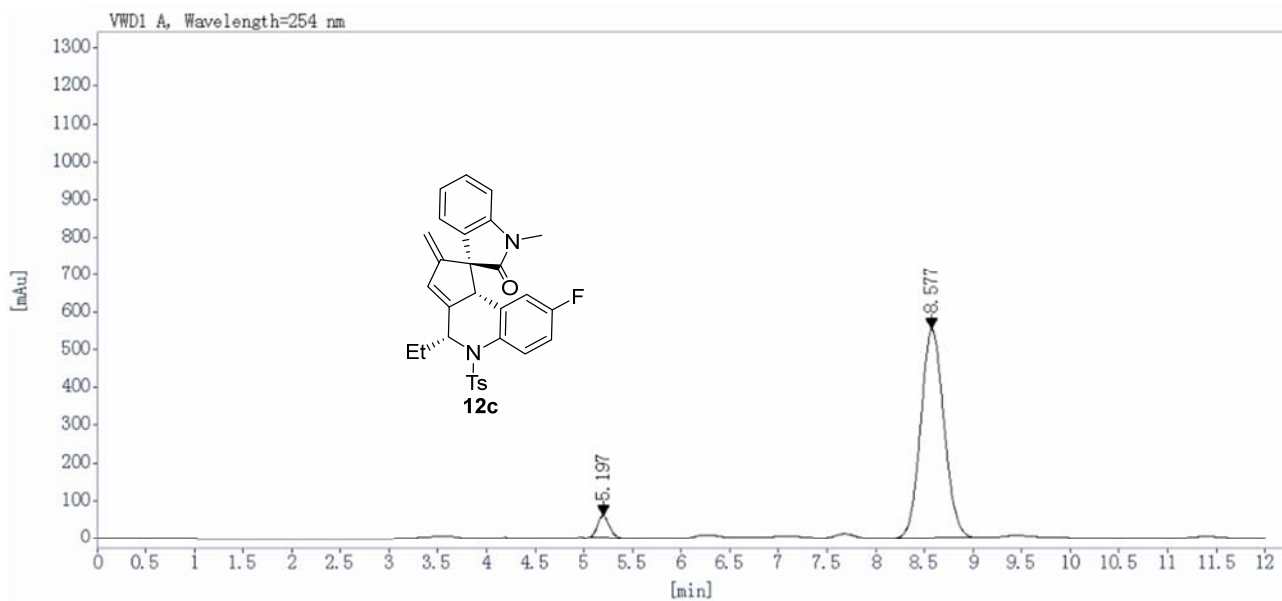

| Ret Time [min] | Peak Type | Width [min] | Height [mAU] | Area [mAU*s] | Area [%] |
|----------------|-----------|-------------|--------------|--------------|----------|
| 5.197          | BBA       | 0.13        | 58.9124      | 498.6888     | 5.0997   |
| 8.577          | BB        | 0.26        | 555.4326     | 9280.1836    | 94.9003  |
| Totals:        |           |             |              | 9778.8724    | 100.0000 |

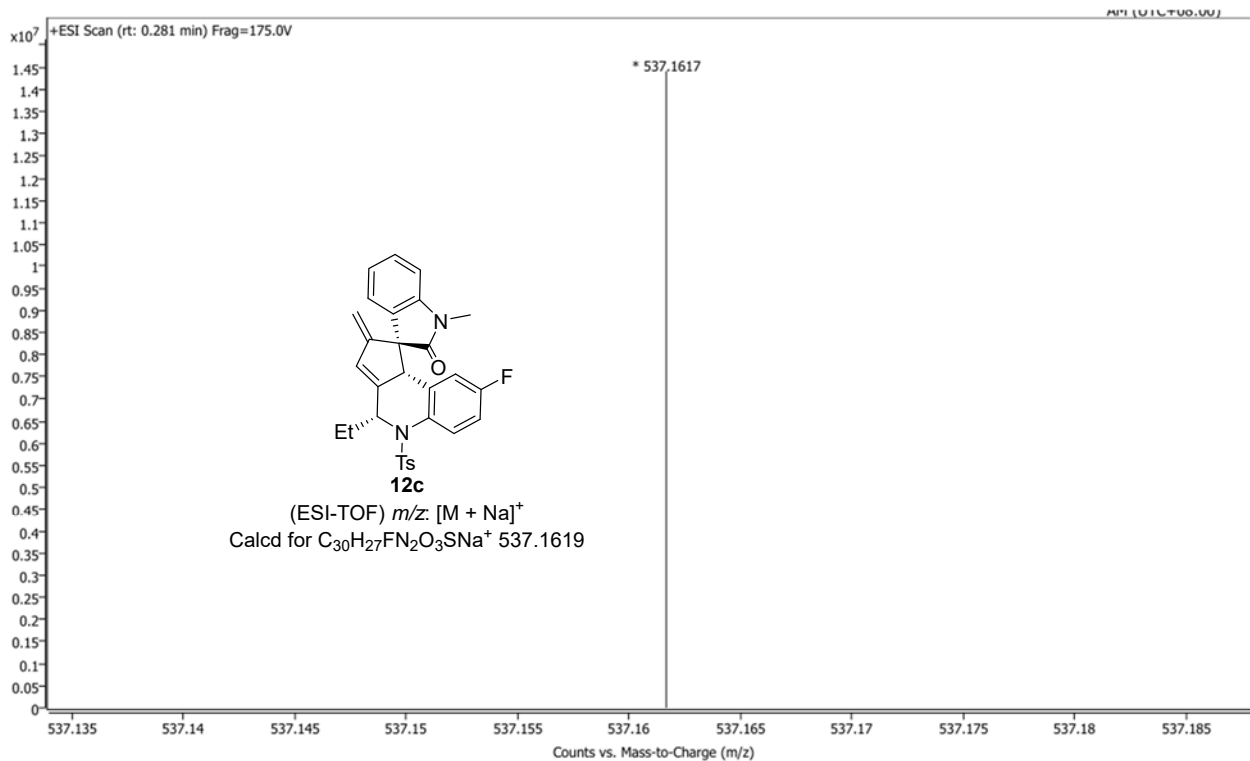

7.651  
7.631  
7.308  
7.303  
7.291  
7.287  
7.260  
7.174  
7.153  
7.134  
7.131  
7.127  
7.112  
6.822  
6.803  
6.784  
6.713  
6.215  
6.020  
5.812  
5.792

-4.710  
-4.366  
-3.554  
-3.023  
-2.562  
-2.450  
-1.980  
-1.715  
-1.702  
-1.697  
-1.684  
-1.680  
-1.667  
-1.662  
-1.649  
-1.643  
-1.622  
-1.604  
-1.597  
-1.586  
-1.578  
-1.569  
-1.561  
-1.551  
-1.543  
-1.533  
-1.526  
-1.188  
-1.170  
-1.151  
0.000

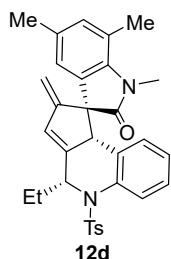

<sup>1</sup>H NMR (400 MHz, CDCl<sub>3</sub>)

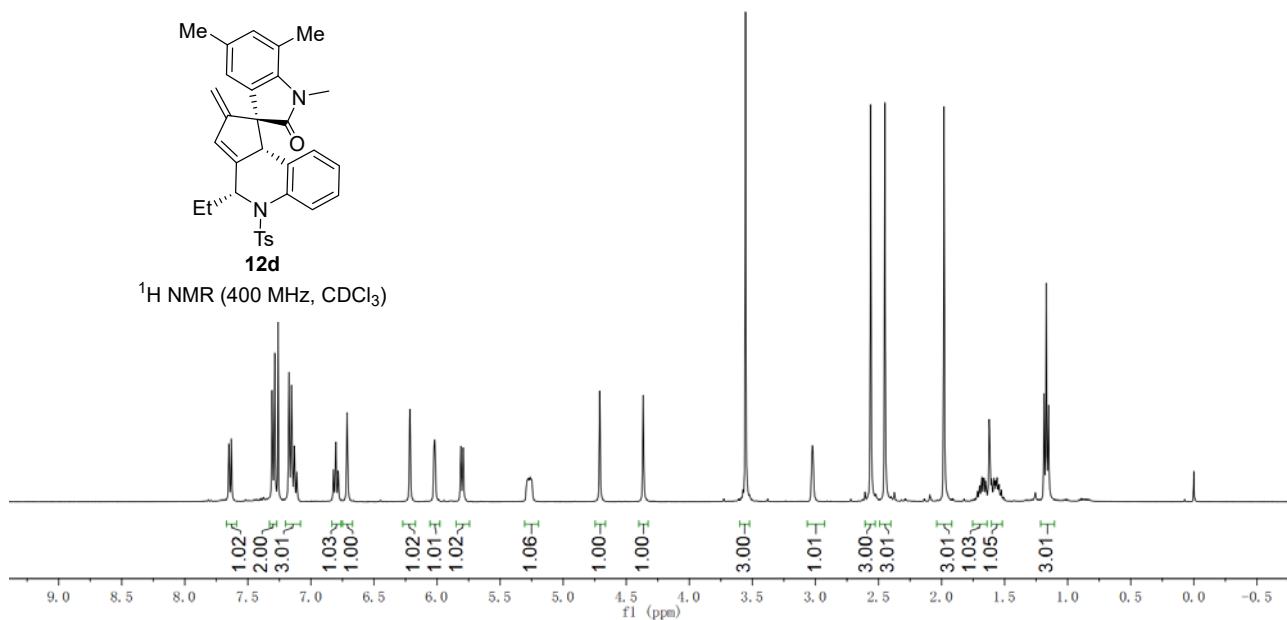

177.559  
155.733  
153.365  
144.770  
137.839  
135.911  
134.314  
132.422  
132.389  
132.352  
131.808  
129.776  
129.368  
126.594  
126.542  
126.392  
124.384  
121.175  
119.630  
103.163

77.367  
77.059  
76.732  
61.064  
58.110  
50.468  
31.357  
30.024  
21.675  
20.748  
19.083  
10.802

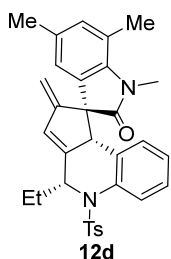

<sup>13</sup>C NMR (100 MHz, CDCl<sub>3</sub>)

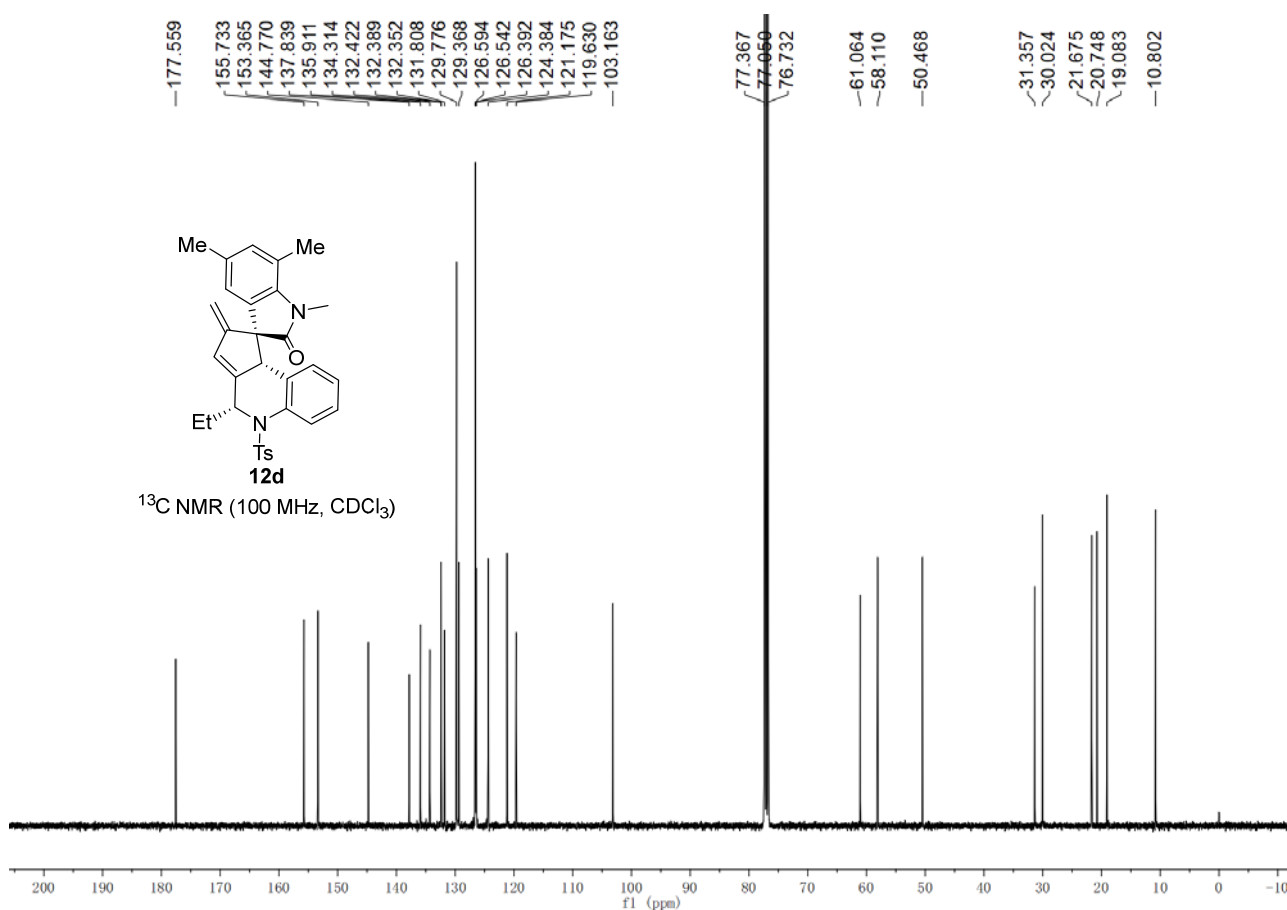

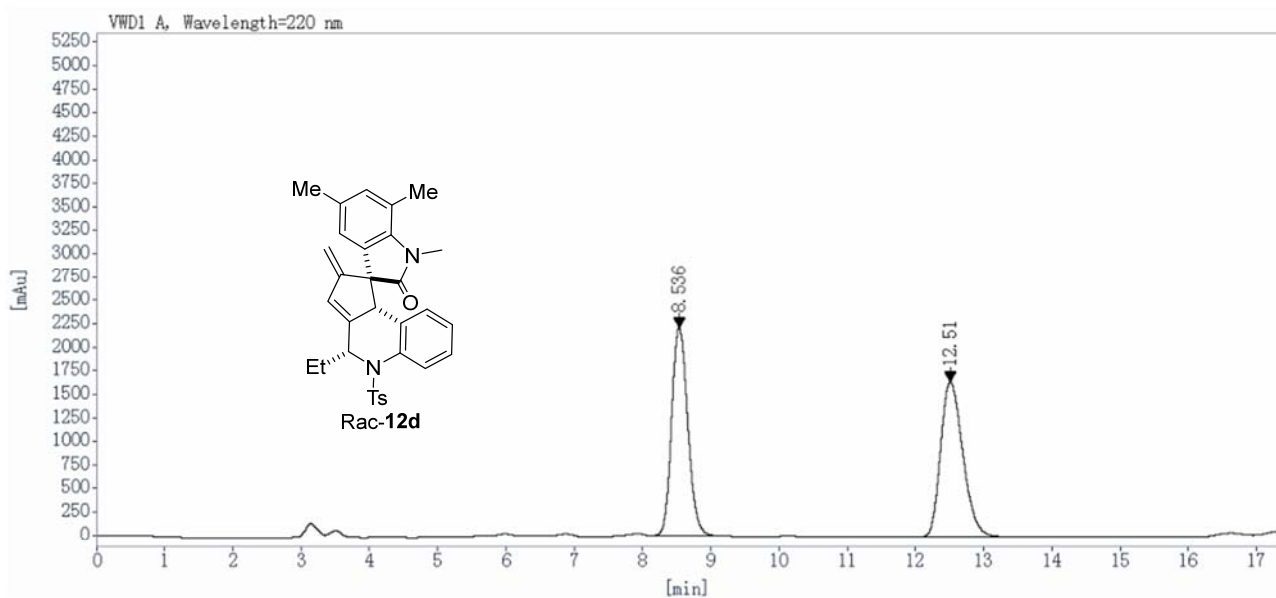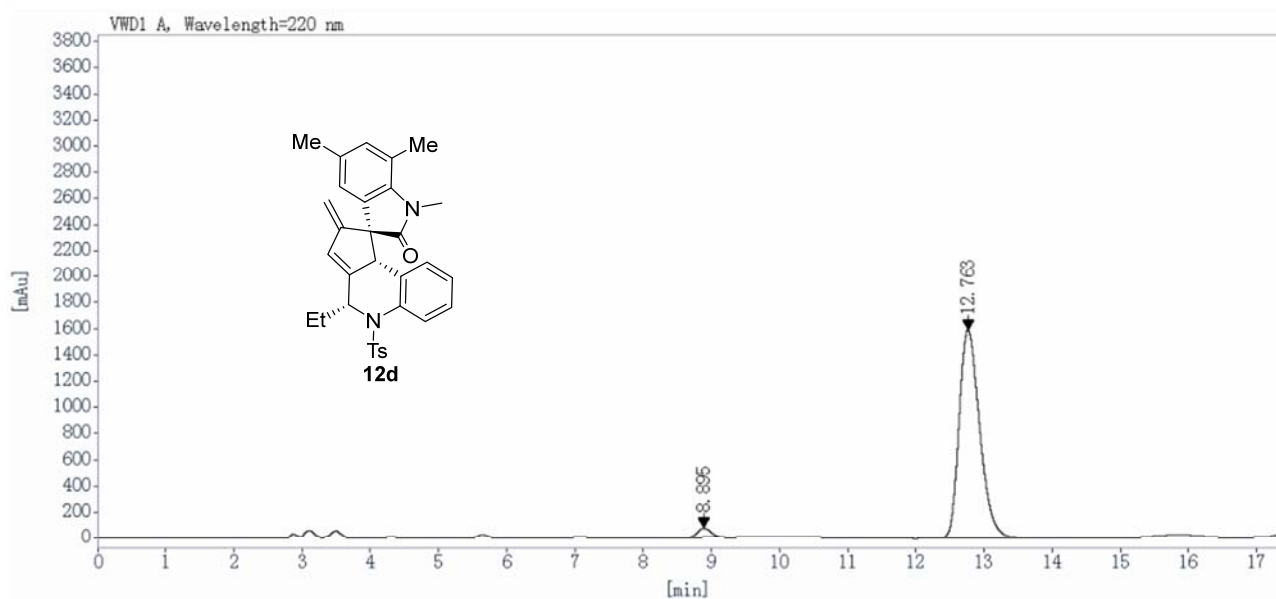



Spectrum from 20240817.wif12 (sample 9) - 5, +TOF MS (400 - 700) from 0.063 to 0.113 min, noise filtered (noise multiplier = 1.5), Gaussian smoothed (0.5 points), centroided

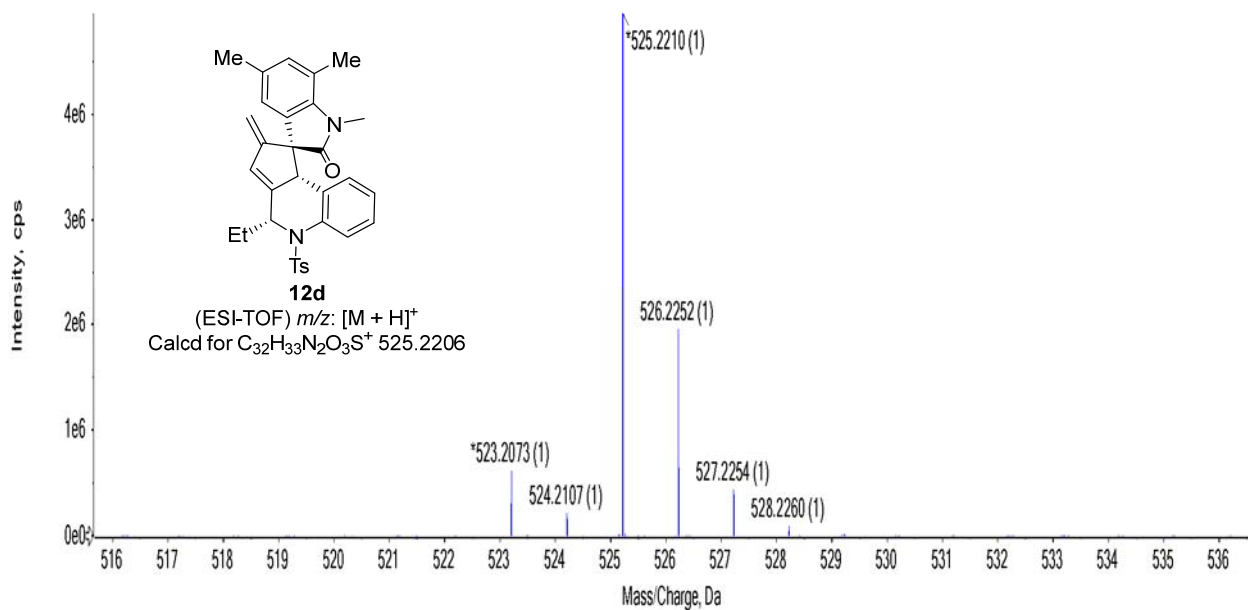

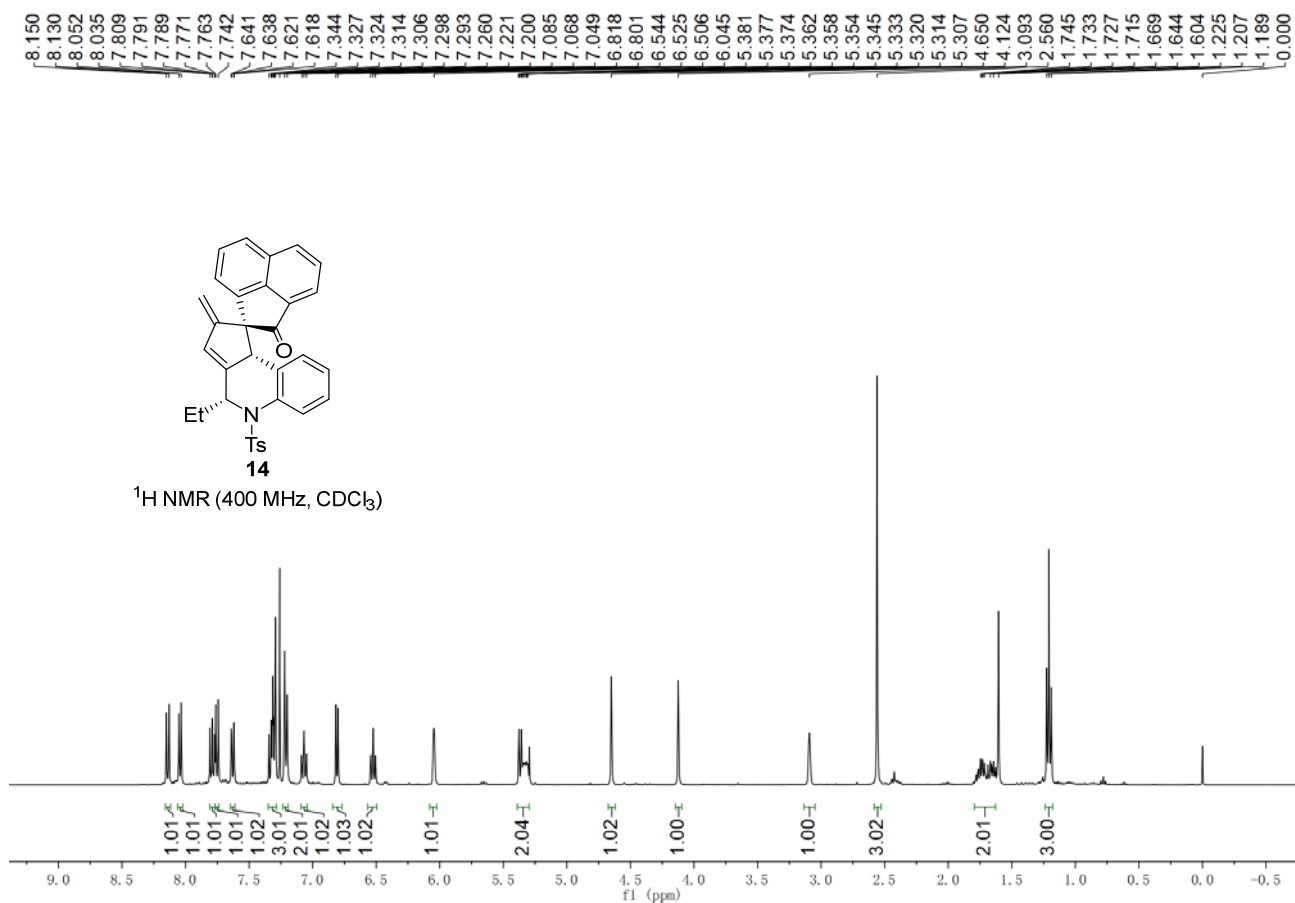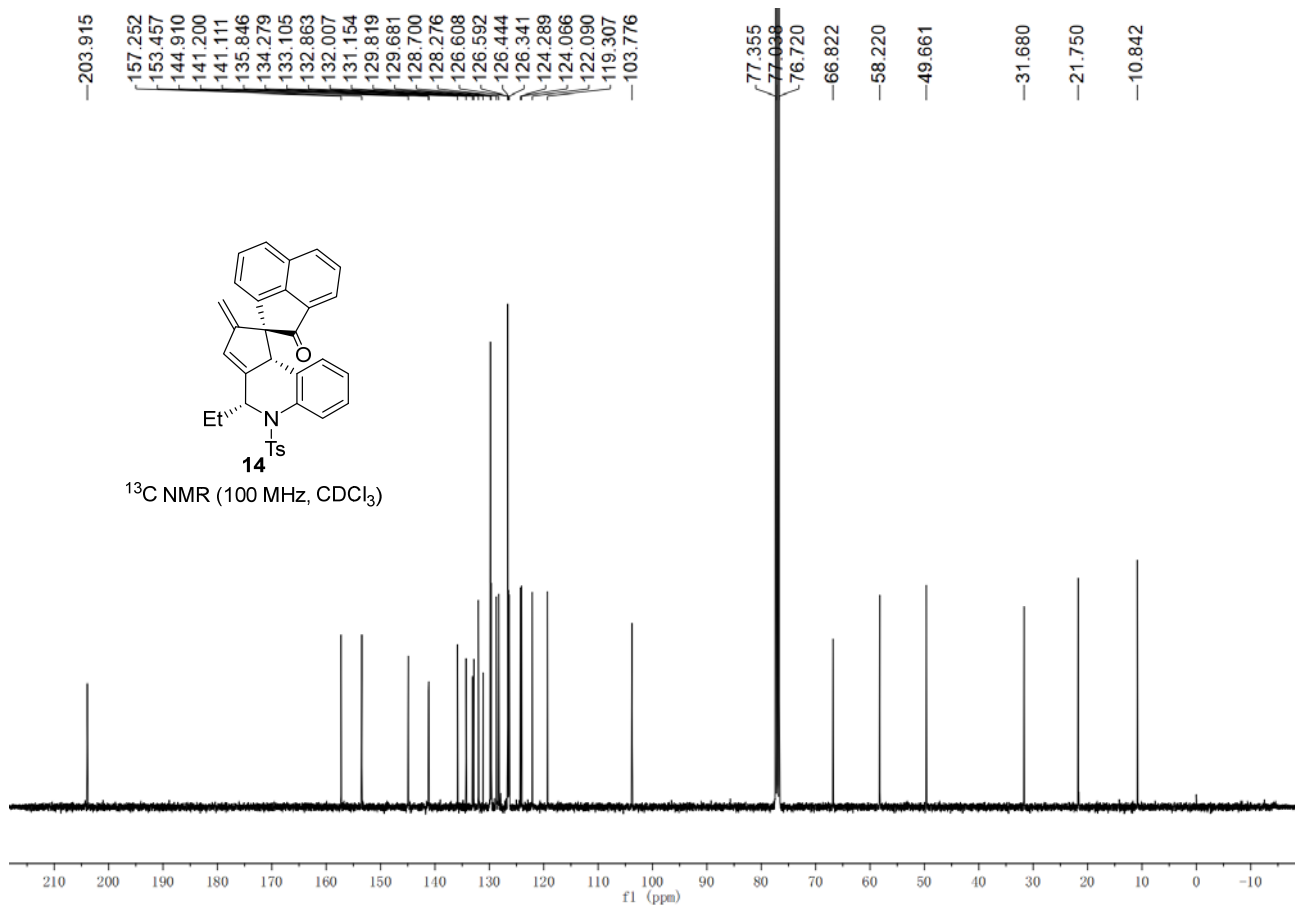

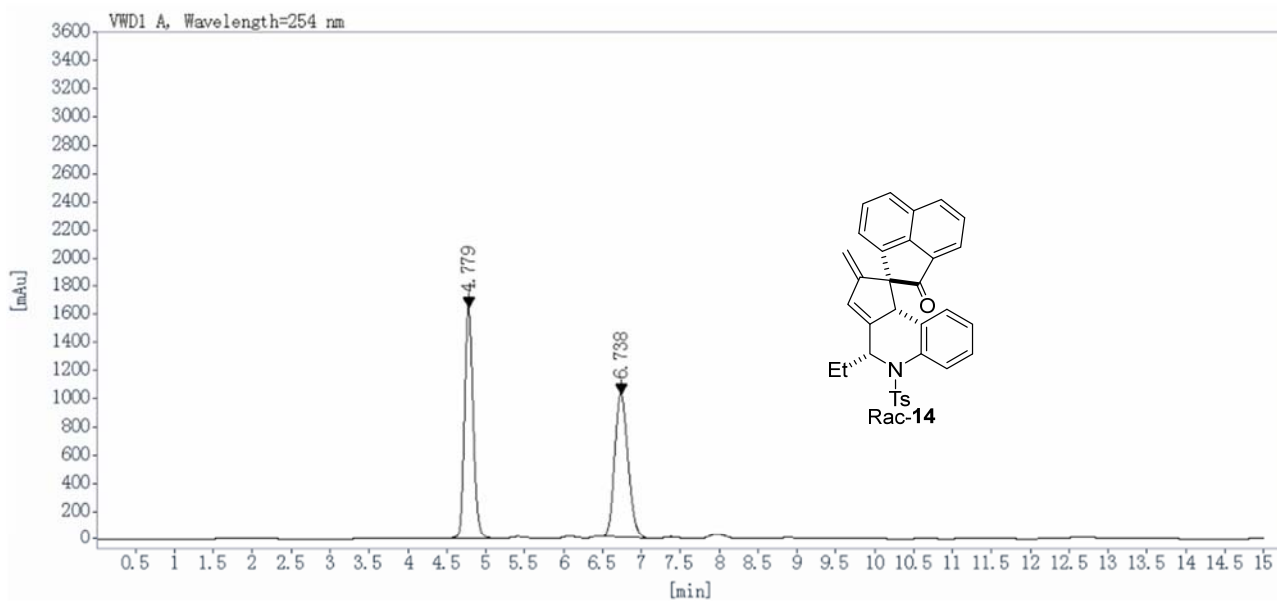

| Ret Time [min] | Peak Type | Width [min] | Height [mAU] | Area [mAU*s] | Area [%] |
|----------------|-----------|-------------|--------------|--------------|----------|
| 4.779          | BBA       | 0.12        | 1636.8729    | 12525.2695   | 50.5571  |
| 6.738          | BBA       | 0.19        | 1018.9764    | 12249.2441   | 49.4429  |
| Totals:        |           |             |              | 24774.5137   | 100.0000 |

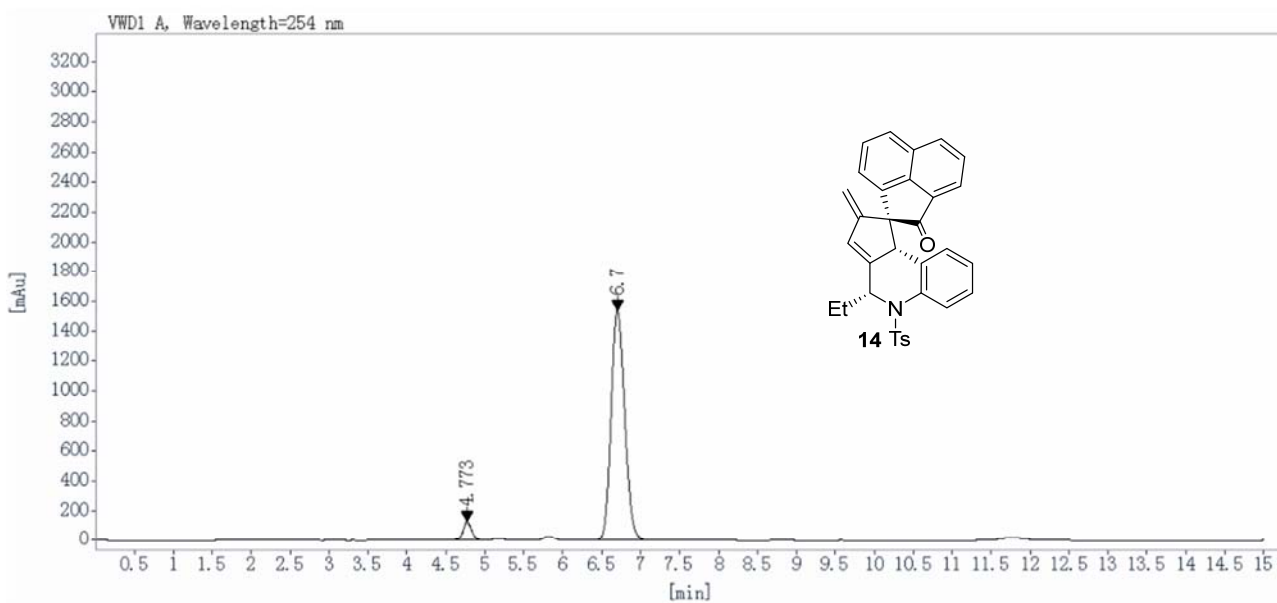

| Ret Time [min] | Peak Type | Width [min] | Height [mAU] | Area [mAU*s] | Area [%] |
|----------------|-----------|-------------|--------------|--------------|----------|
| 4.773          | BB        | 0.12        | 124.6385     | 955.9208     | 4.8654   |
| 6.700          | BBA       | 0.19        | 1540.2458    | 18691.2891   | 95.1346  |
| Totals:        |           |             |              | 19647.2099   | 100.0000 |

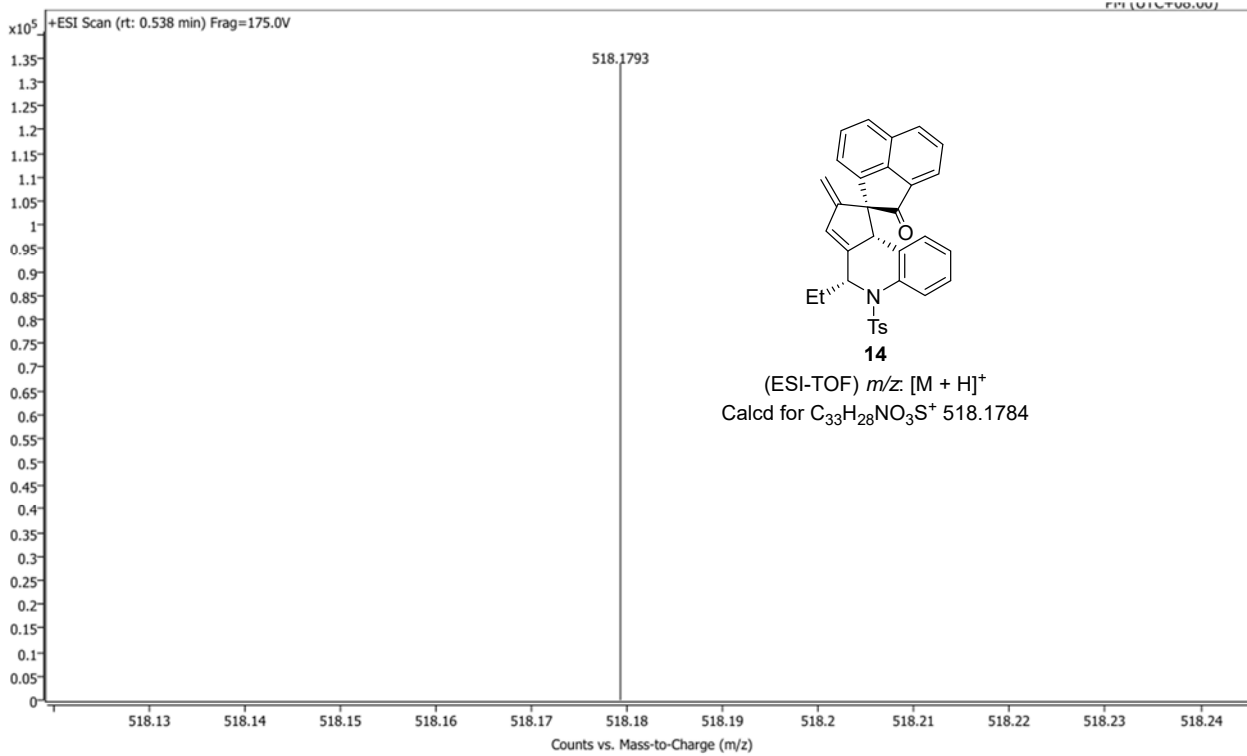

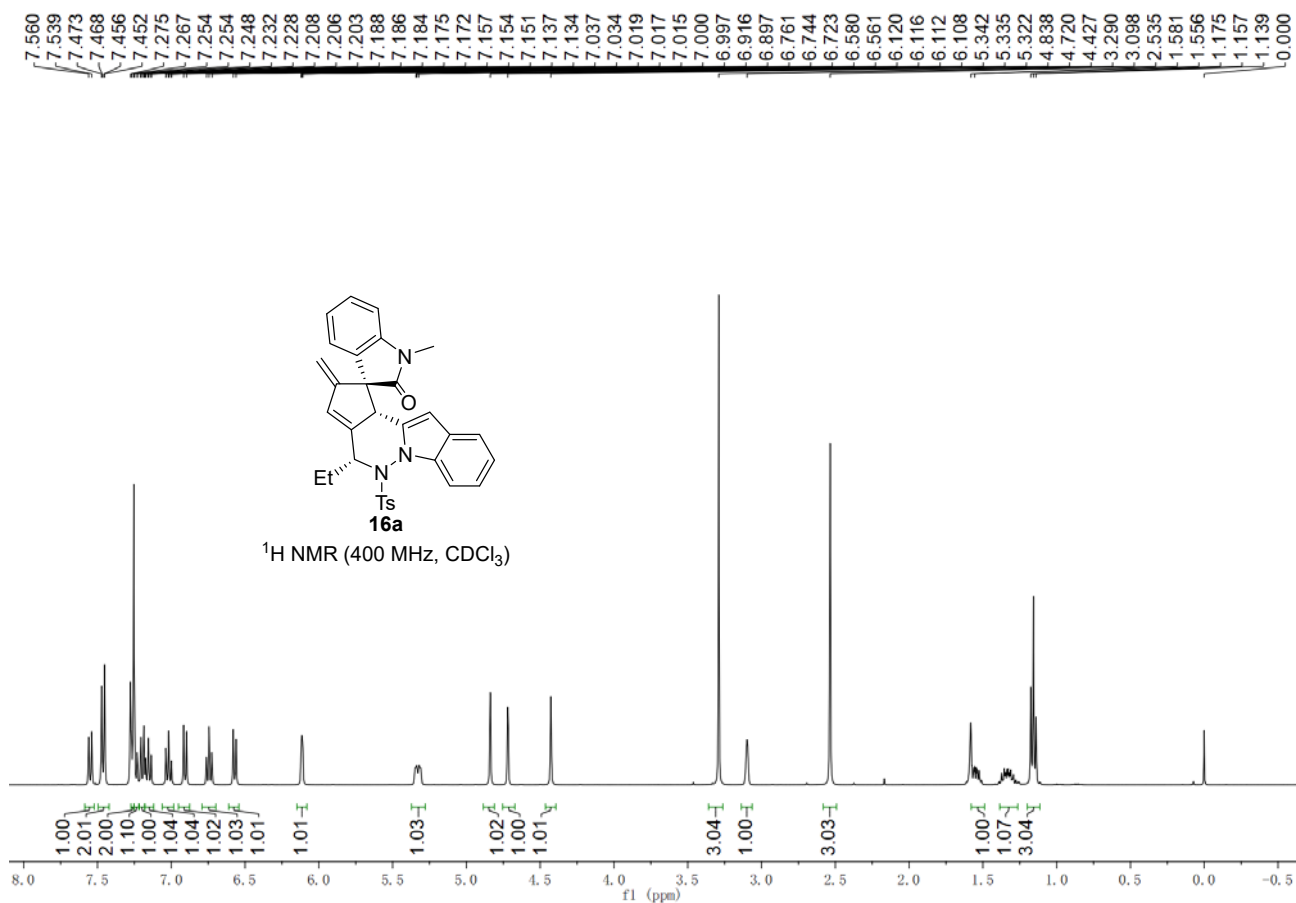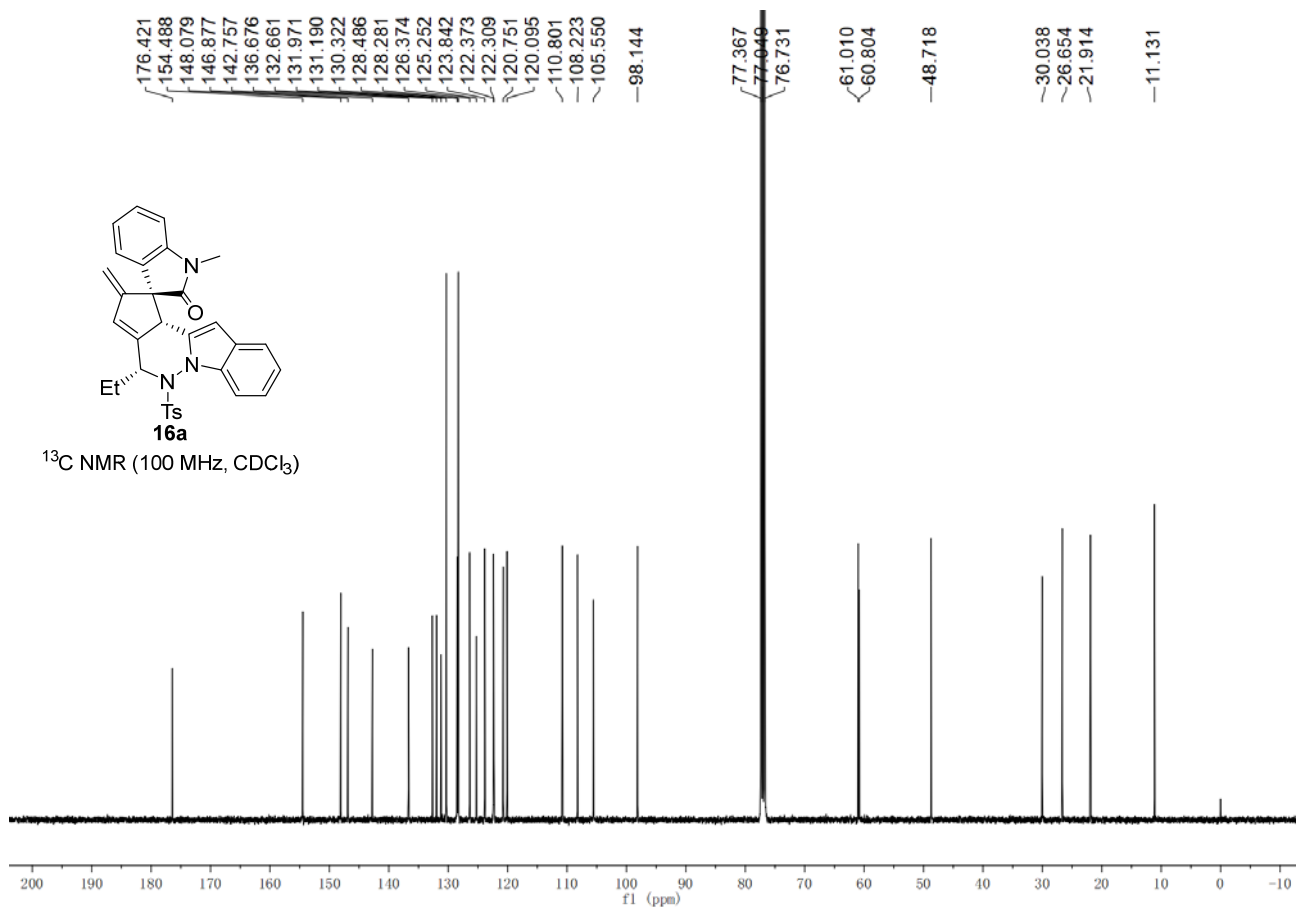

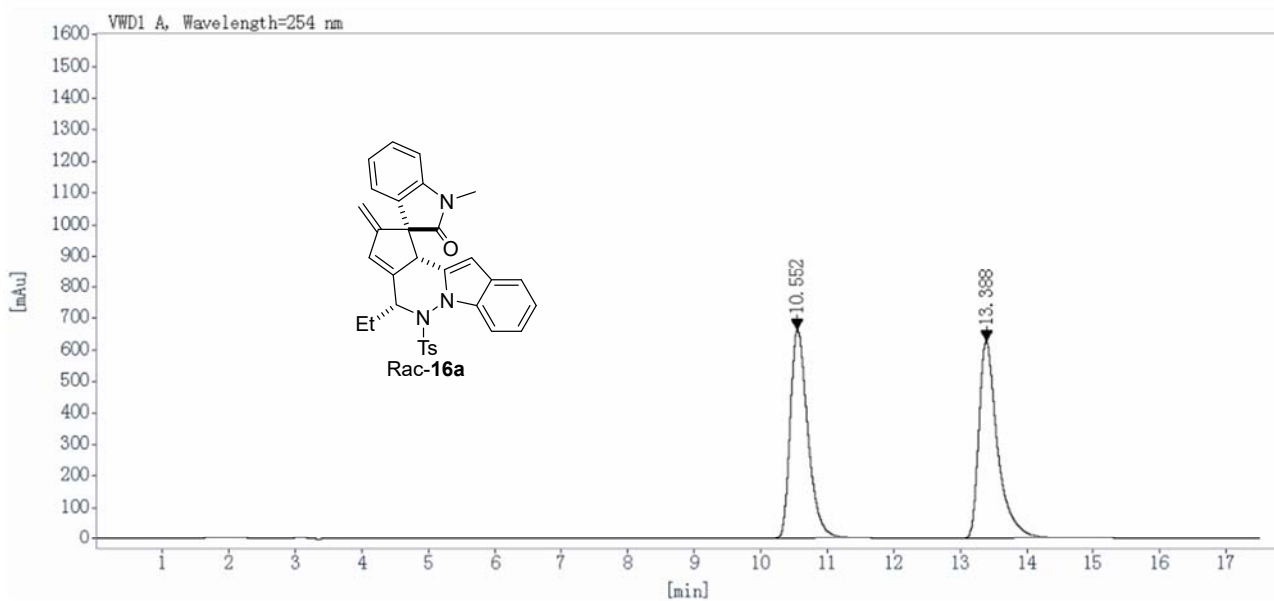

| Ret Time [min] | Peak Type | Width [min] | Height [mAU] | Area [mAU*s] | Area [%] |
|----------------|-----------|-------------|--------------|--------------|----------|
| 10.552         | BBA       | 0.28        | 663.3882     | 12264.3691   | 49.8749  |
| 13.388         | BBA       | 0.29        | 626.3311     | 12325.8848   | 50.1251  |
| Totals:        |           |             |              | 24590.2539   | 100.0000 |

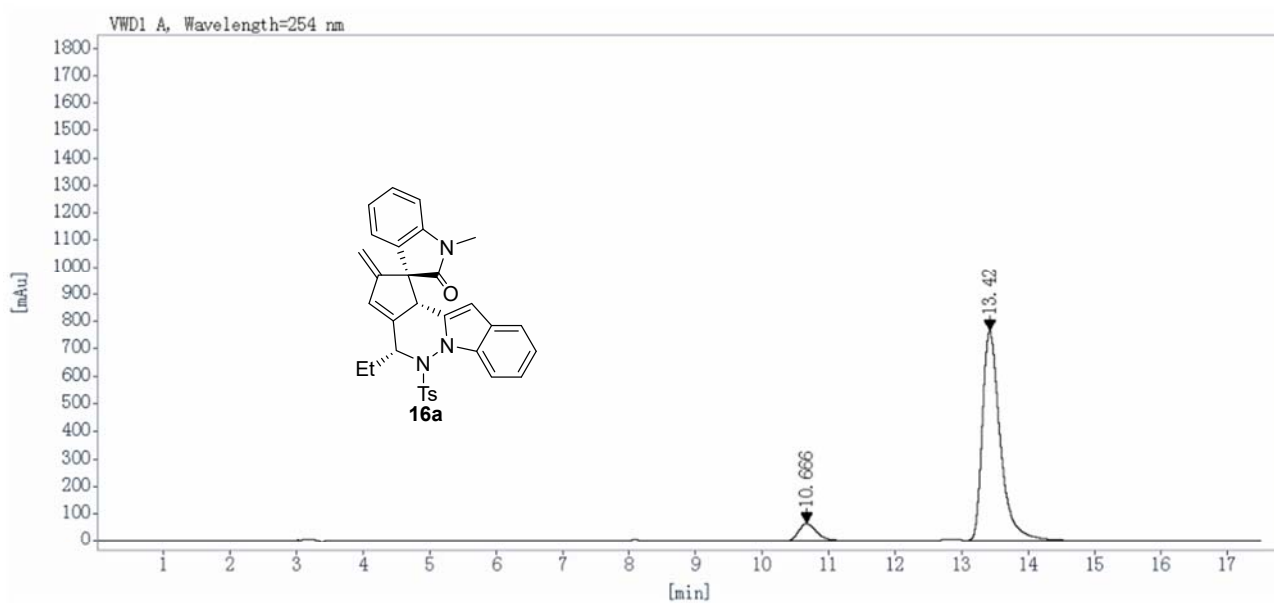

| Ret Time [min] | Peak Type | Width [min] | Height [mAU] | Area [mAU*s] | Area [%] |
|----------------|-----------|-------------|--------------|--------------|----------|
| 10.666         | BB        | 0.29        | 63.5017      | 1185.3958    | 7.6949   |
| 13.420         | BBA       | 0.28        | 763.5140     | 14219.4668   | 92.3051  |
| Totals:        |           |             |              | 15404.8625   | 100.0000 |

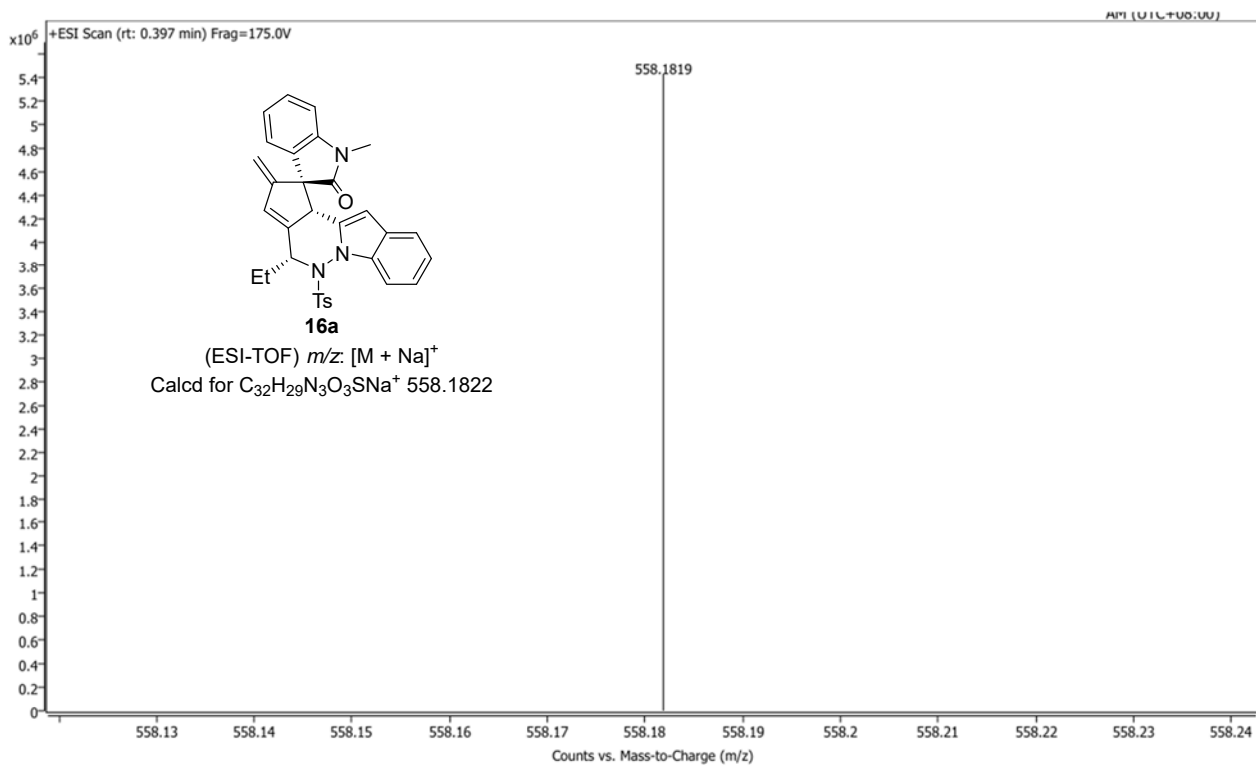

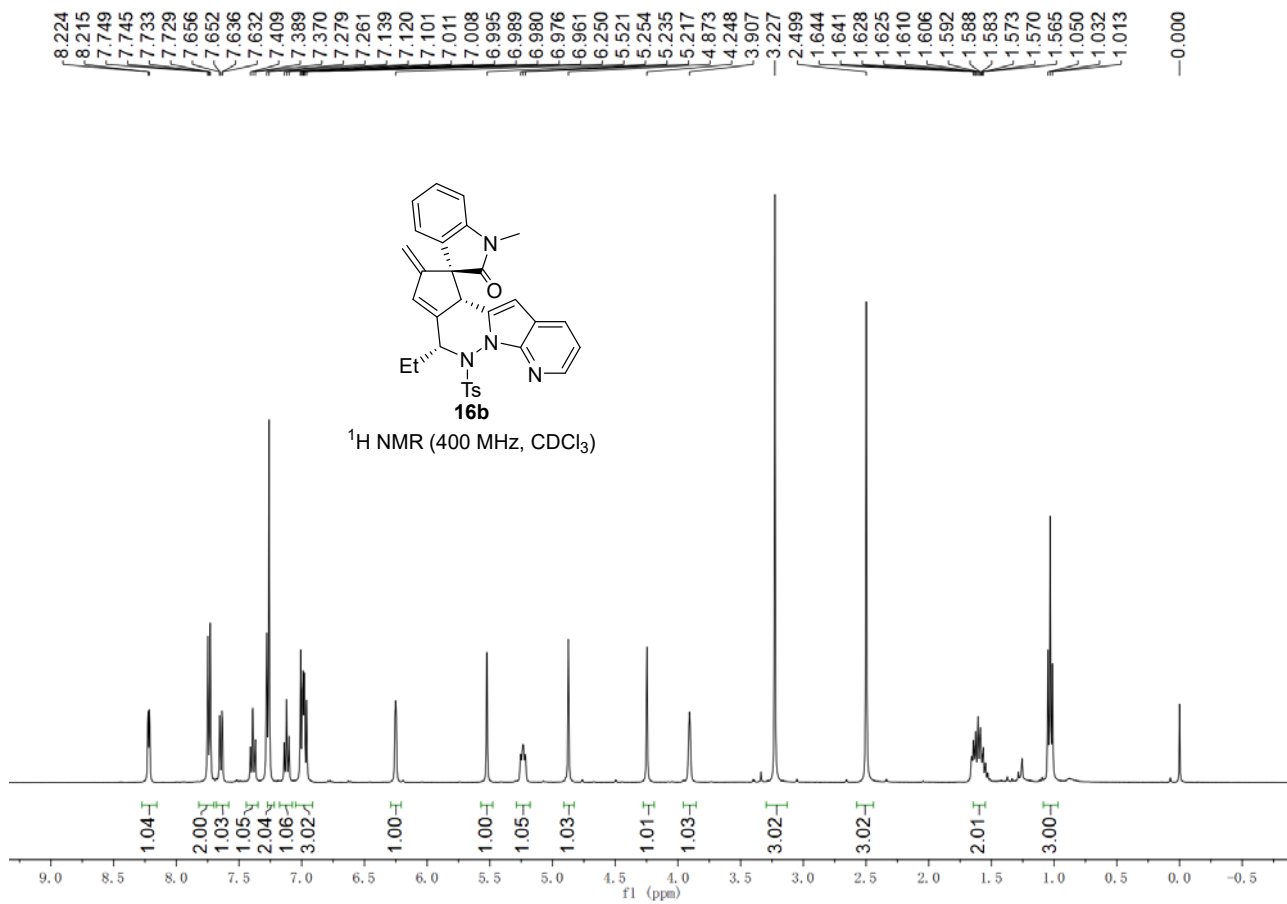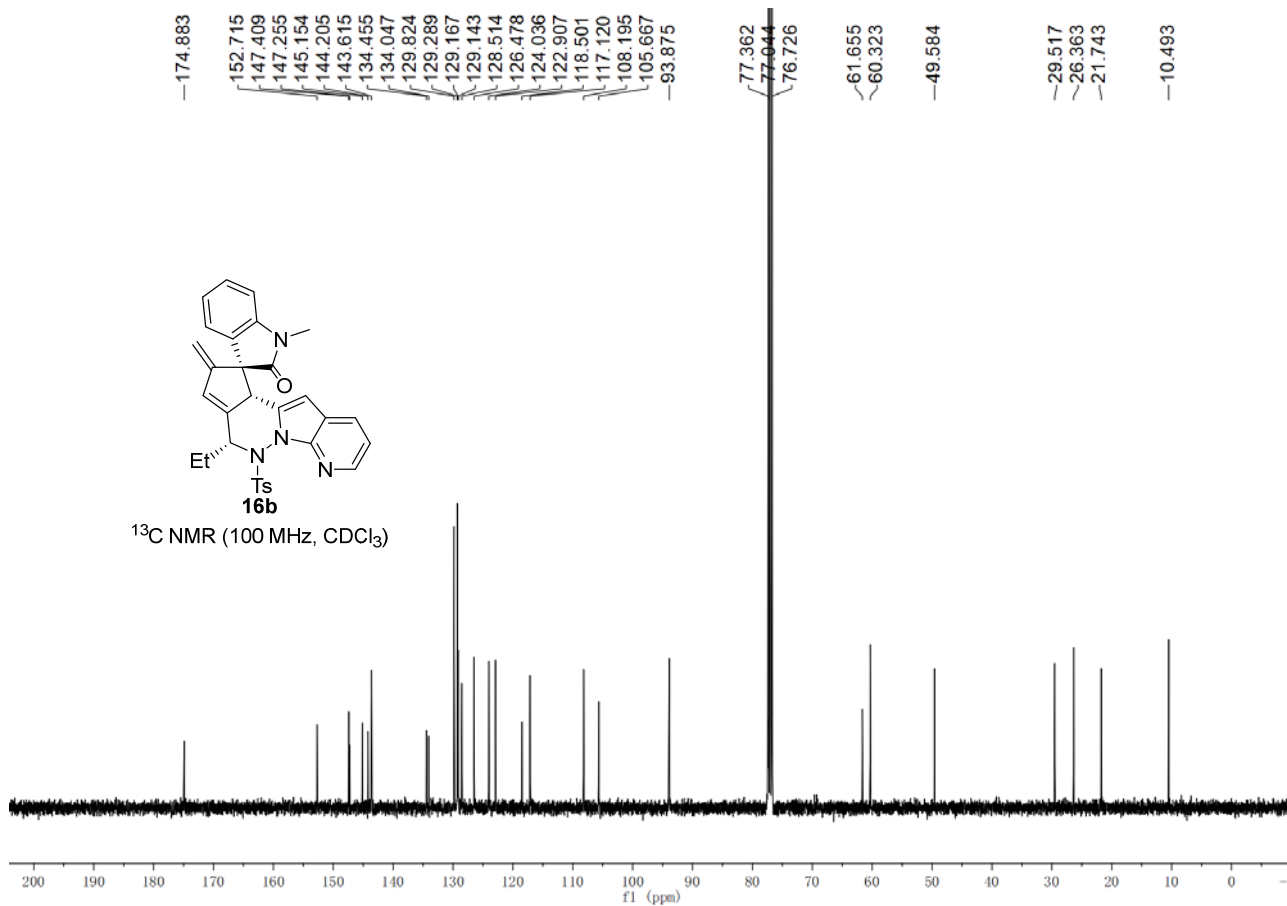



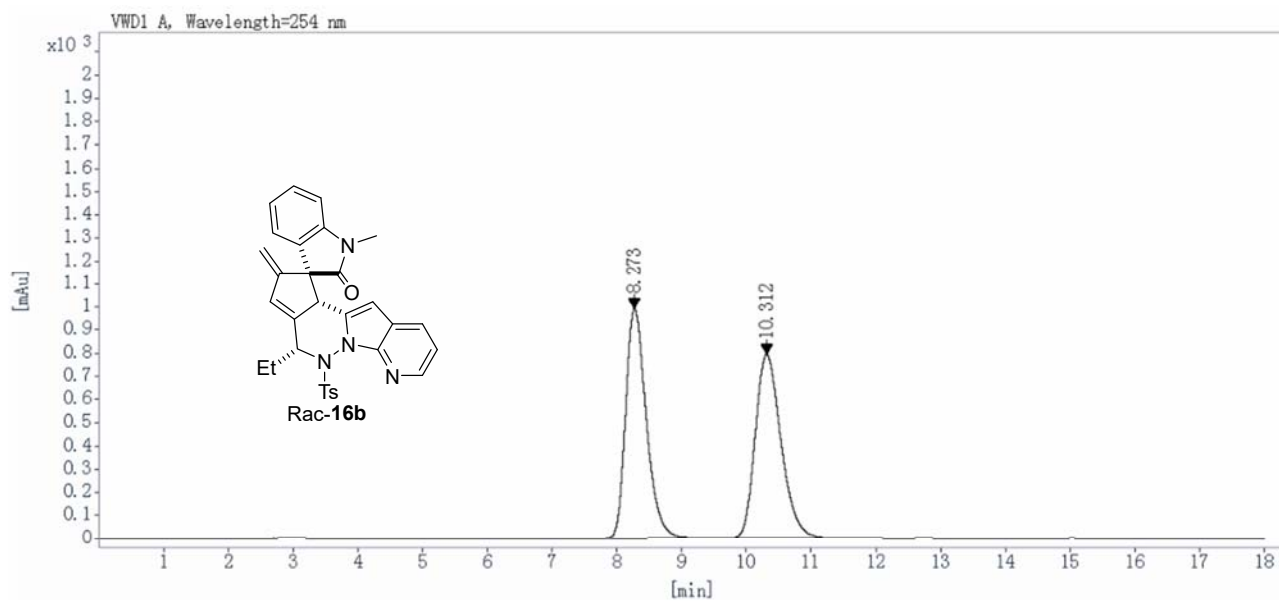

| Ret Time [min] | Peak Type | Width [min] | Height [mAU] | Area [mAU*s] | Area [%] |
|----------------|-----------|-------------|--------------|--------------|----------|
| 8.273          | BBA       | 0.34        | 991.5527     | 21815.1191   | 49.8887  |
| 10.312         | BBA       | 0.43        | 793.1179     | 21912.4746   | 50.1113  |
| Totals:        |           |             |              | 43727.5938   | 100.0000 |

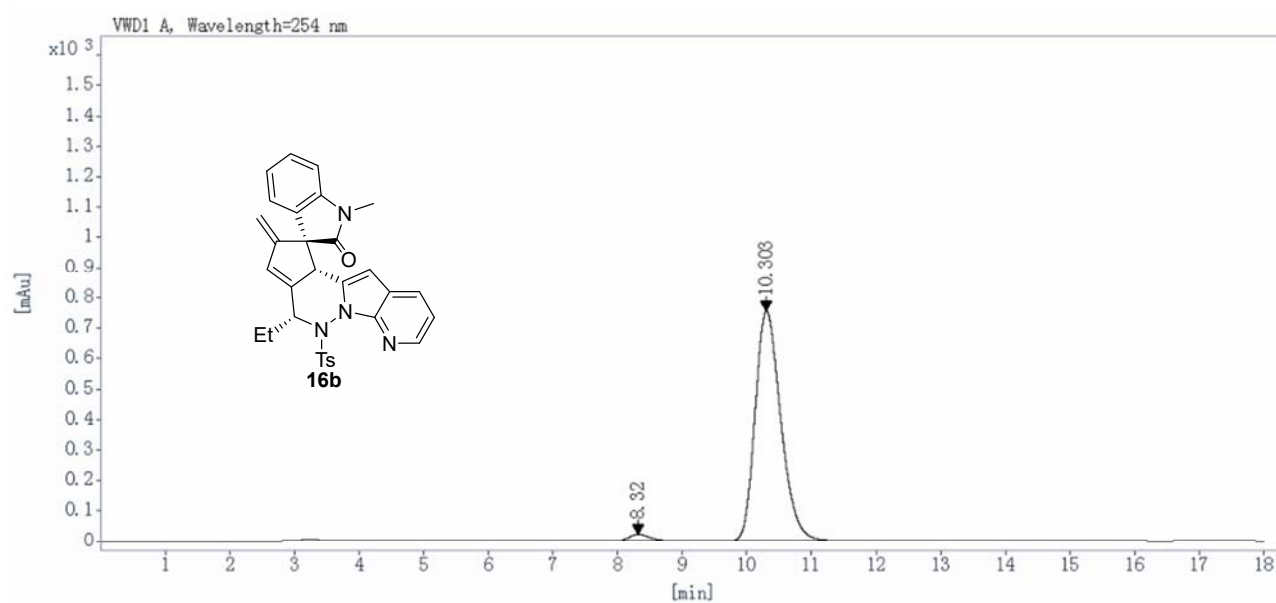

| Ret Time [min] | Peak Type | Width [min] | Height [mAU] | Area [mAU*s] | Area [%] |
|----------------|-----------|-------------|--------------|--------------|----------|
| 8.320          | BBA       | 0.33        | 22.4122      | 476.5341     | 2.2473   |
| 10.303         | BBA       | 0.43        | 753.7796     | 20728.4980   | 97.7527  |
| Totals:        |           |             |              | 21205.0321   | 100.0000 |

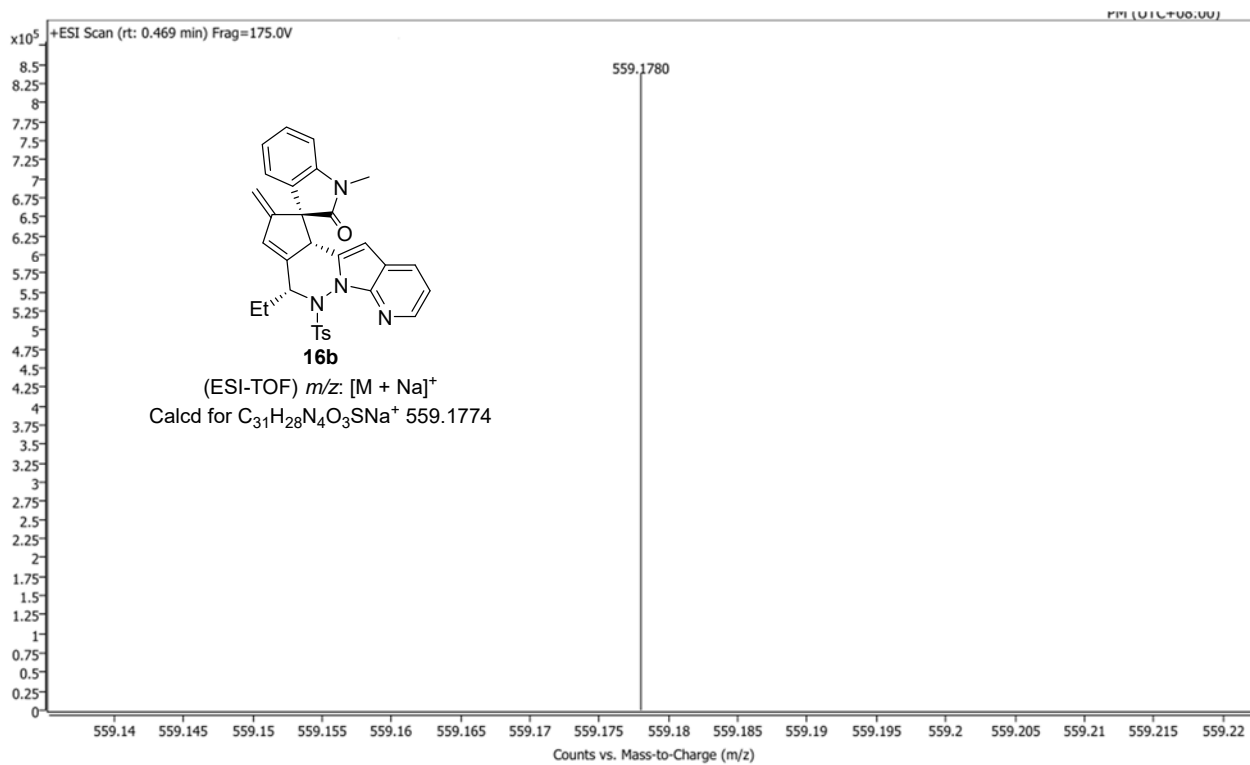

7.626  
7.622  
7.606  
7.602  
7.303  
7.299  
7.287  
7.283  
7.261  
7.215  
7.198  
7.195  
7.182  
7.180  
7.176  
7.161  
7.147  
7.132  
7.128  
7.125  
6.894  
6.874  
6.769  
6.765  
6.762  
6.750  
6.746  
6.743  
6.727  
6.724  
6.588  
6.568  
6.568  
6.035  
6.030  
6.027  
6.023  
5.736  
5.717  
5.339  
4.711  
4.370  
3.317  
2.988  
2.462  
1.626  
1.622  
1.602  
1.334  
1.327  
1.312  
1.308  
1.296  
1.289  
1.274  
1.255  
0.904  
0.887  
0.869  
0.000

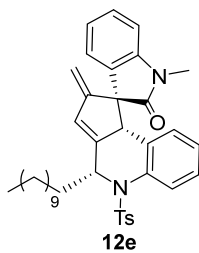

<sup>1</sup>H NMR (400 MHz, CDCl<sub>3</sub>)

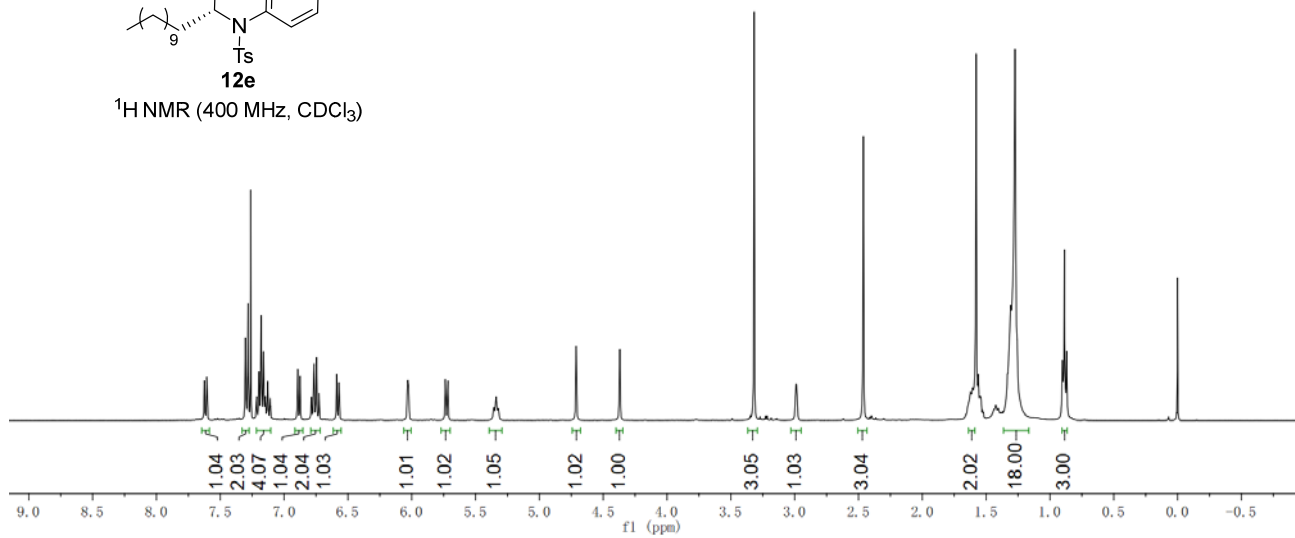

176.740  
155.089  
153.595  
144.826  
142.529  
135.835  
134.340  
132.386  
131.726  
129.783  
129.640  
128.109  
126.742  
126.582  
126.557  
126.145  
124.280  
122.645  
122.464  
108.467  
103.221

77.346  
77.098  
76.710  
61.639  
56.705  
50.107  
38.434  
31.942  
29.681  
29.657  
29.633  
29.568  
29.384  
29.089  
26.681  
25.966  
22.711  
21.671  
14.147

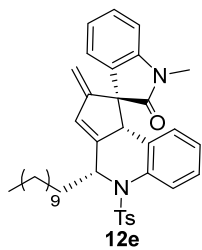

<sup>13</sup>C NMR (100 MHz, CDCl<sub>3</sub>)

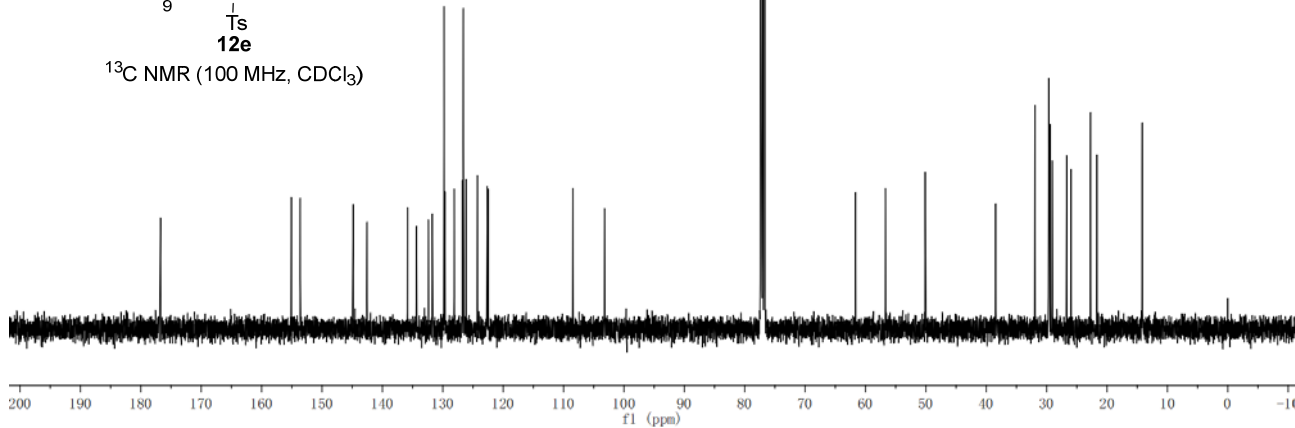

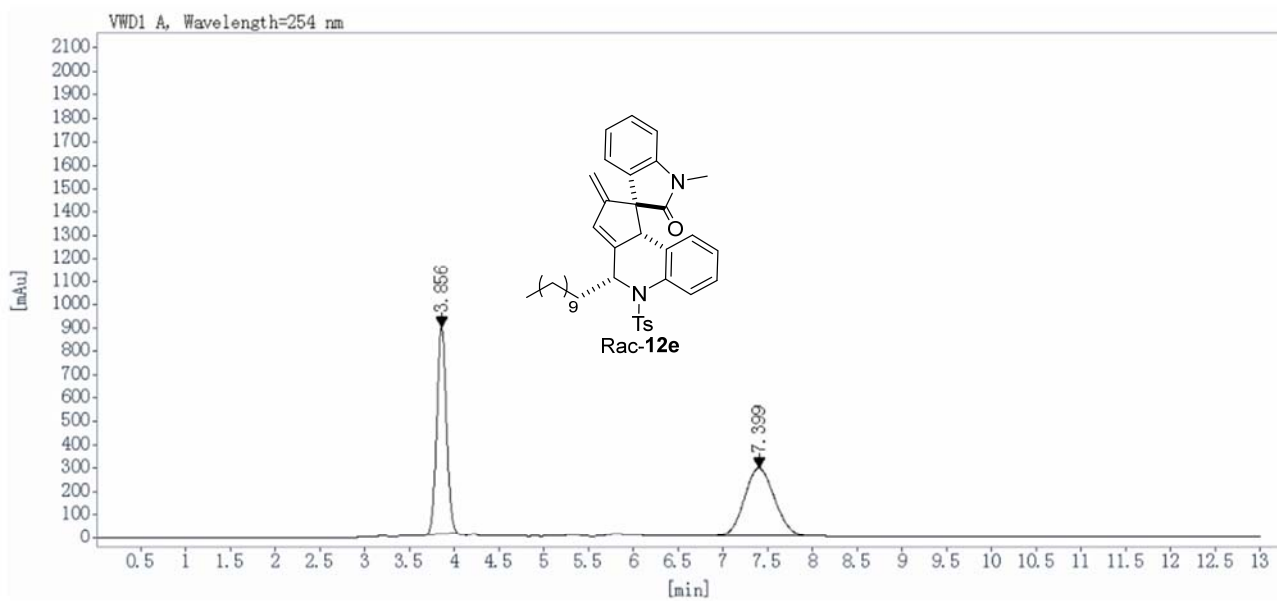

| Ret Time [min] | Peak Type | Width [min] | Height [mAU] | Area [mAU*s] | Area [%] |
|----------------|-----------|-------------|--------------|--------------|----------|
| 3.856          | BBA       | 0.12        | 888.1533     | 6696.6675    | 49.0735  |
| 7.399          | BB        | 0.37        | 294.7439     | 6949.5410    | 50.9265  |
| Totals:        |           |             |              | 13646.2085   | 100.0000 |

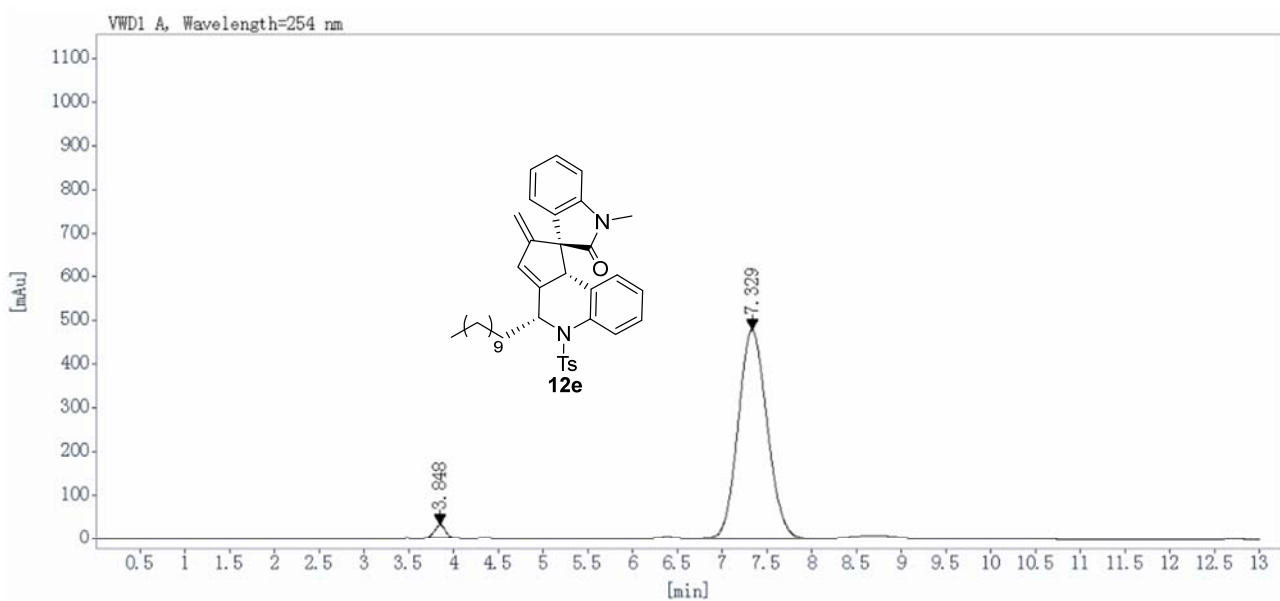

| Ret Time [min] | Peak Type | Width [min] | Height [mAU] | Area [mAU*s] | Area [%] |
|----------------|-----------|-------------|--------------|--------------|----------|
| 3.848          | BBA       | 0.13        | 30.5947      | 259.3460     | 2.3498   |
| 7.329          | BBA       | 0.35        | 477.0155     | 10777.4502   | 97.6502  |
| Totals:        |           |             |              | 11036.7962   | 100.0000 |

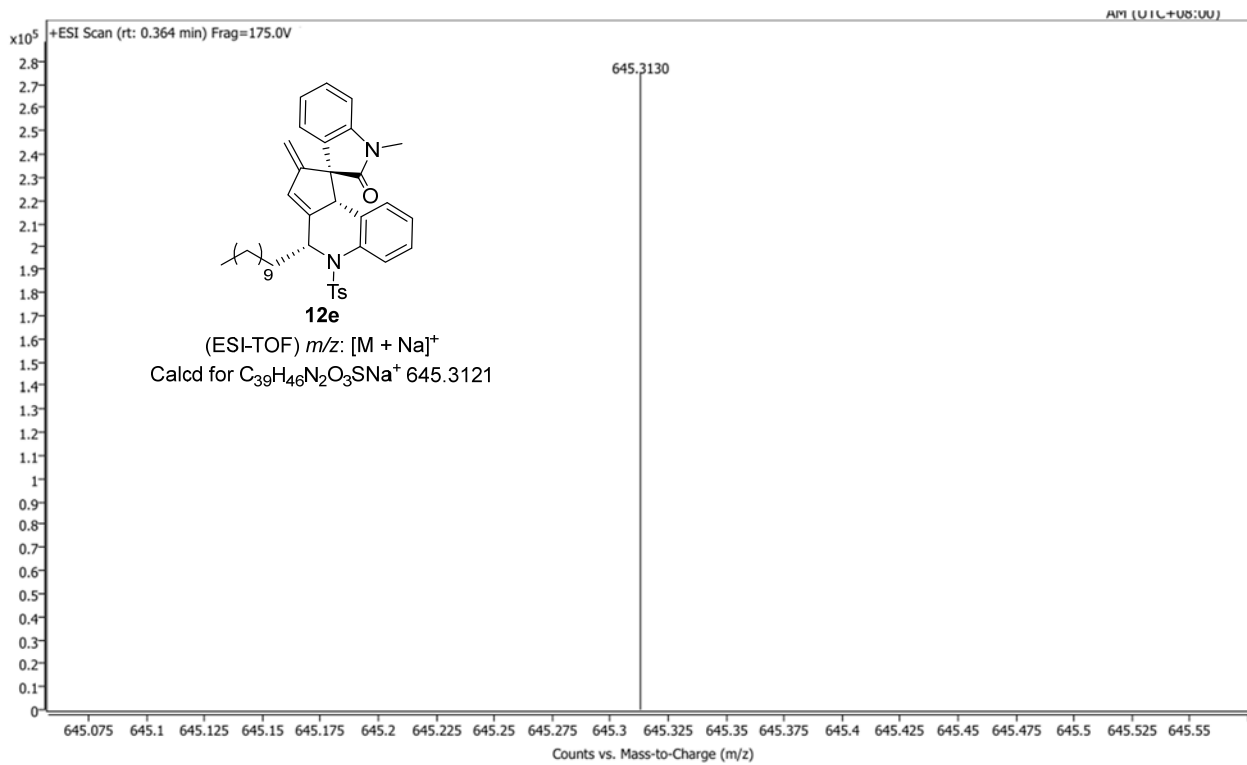

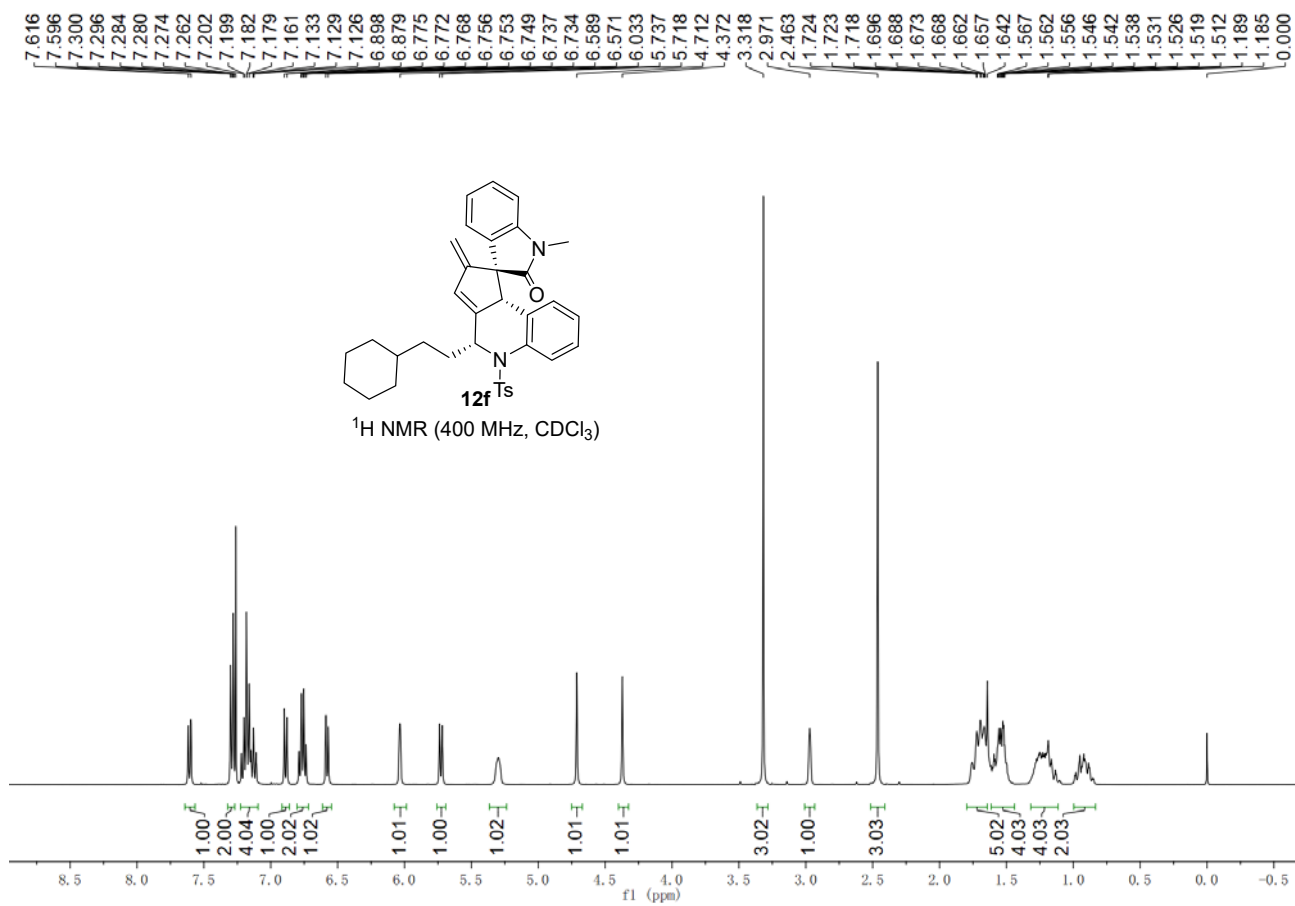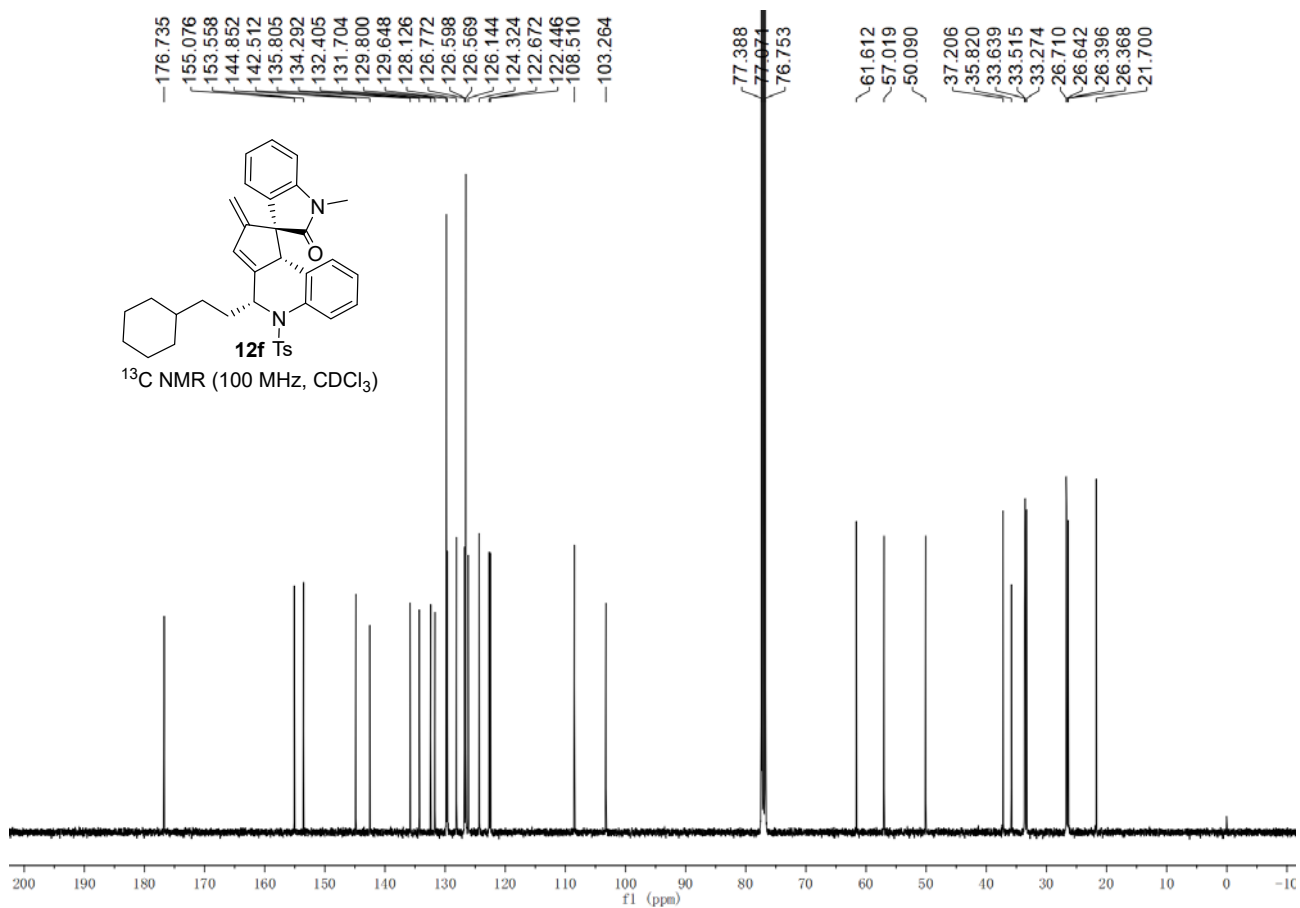

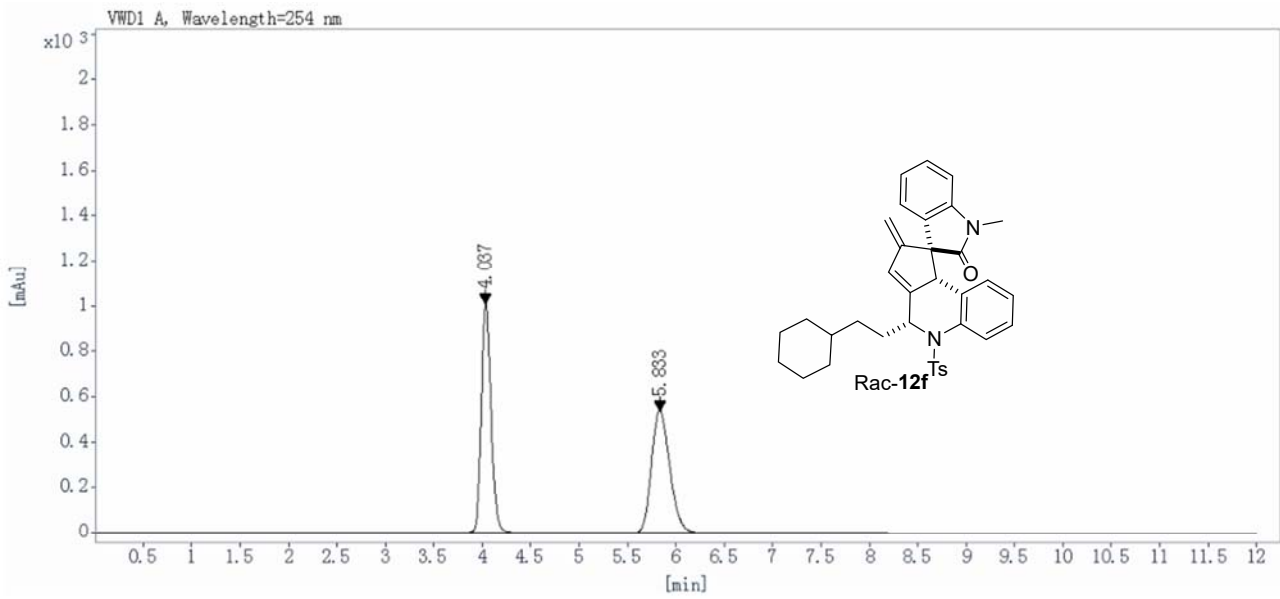

| Ret Time [min] | Peak Type | Width [min] | Height [mAU] | Area [mAU*s] | Area [%] |
|----------------|-----------|-------------|--------------|--------------|----------|
| 4.037          | BBA       | 0.11        | 1008.1496    | 7035.1875    | 49.8210  |
| 5.833          | BBA       | 0.21        | 538.7615     | 7085.7324    | 50.1790  |
| Totals:        |           |             |              | 14120.9199   | 100.0000 |

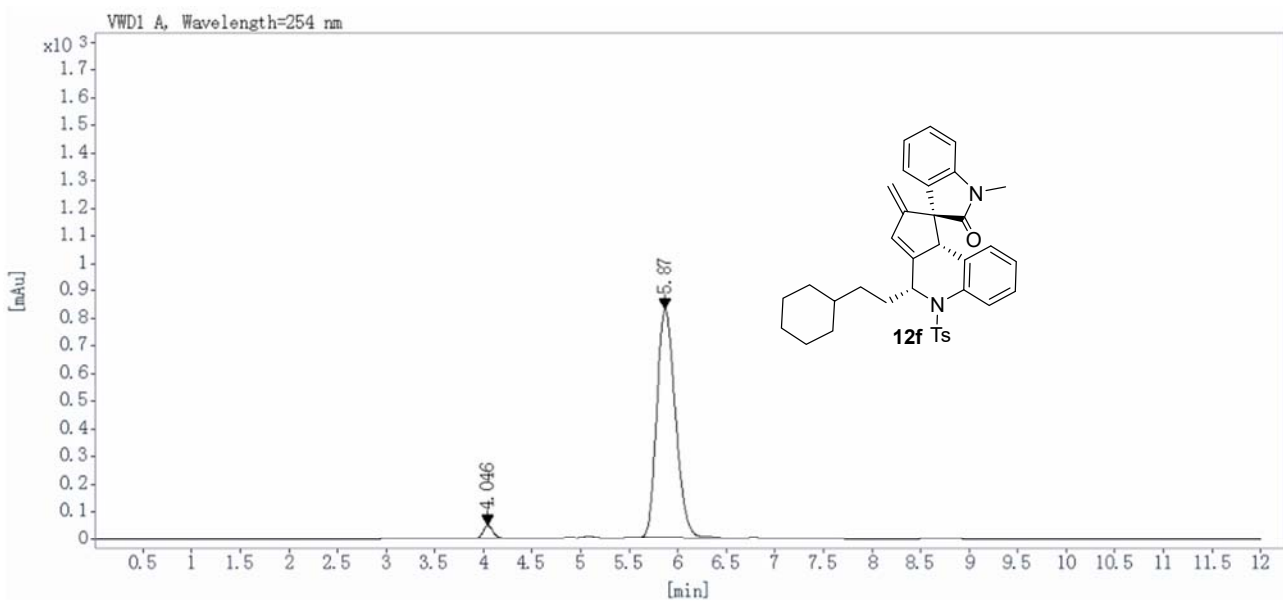

| Ret Time [min] | Peak Type | Width [min] | Height [mAU] | Area [mAU*s] | Area [%] |
|----------------|-----------|-------------|--------------|--------------|----------|
| 4.046          | BBA       | 0.11        | 48.3694      | 348.9897     | 3.0585   |
| 5.870          | BBA       | 0.21        | 829.1635     | 11061.6025   | 96.9415  |
| Totals:        |           |             |              | 11410.5922   | 100.0000 |

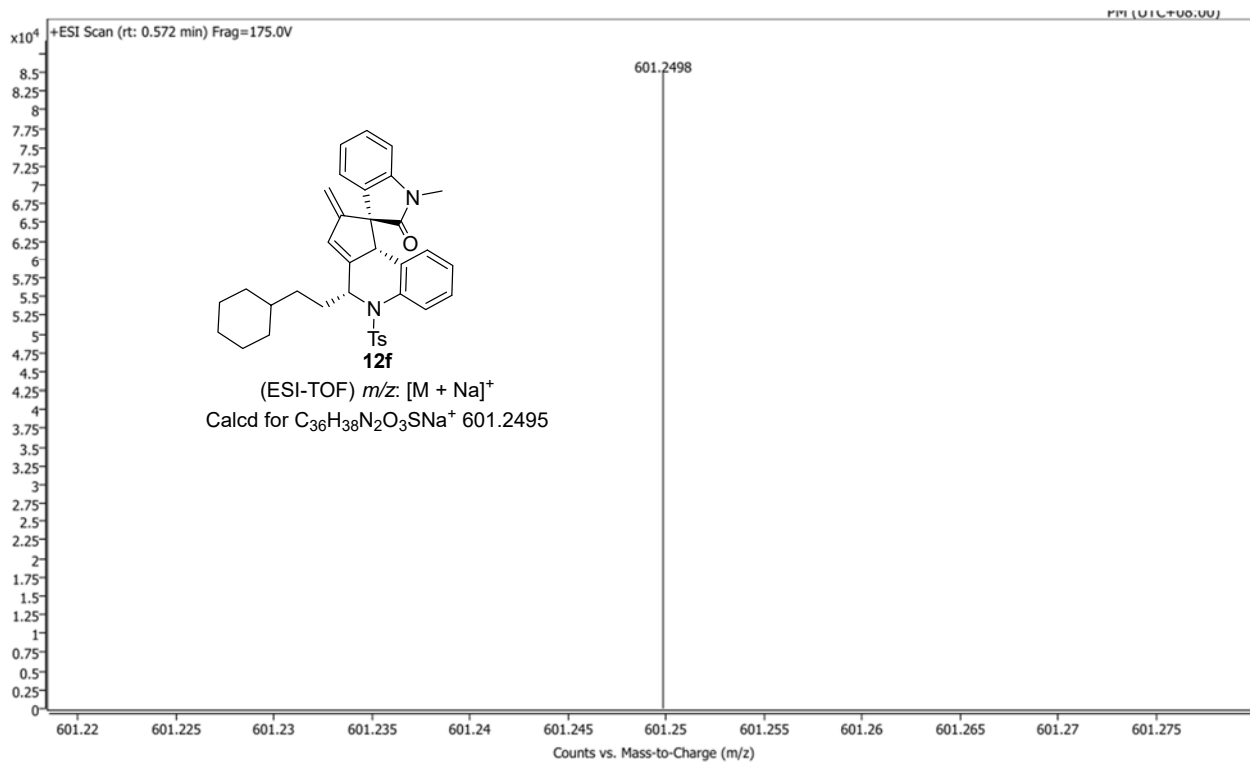



7.672  
7.652  
7.325  
7.312  
7.307  
7.303  
7.296  
7.291  
7.288  
7.287  
7.258  
7.253  
7.247  
7.237  
7.234  
7.228  
7.225  
7.207  
7.202  
7.199  
7.189  
7.183  
7.180  
7.175  
7.172  
7.168  
7.163  
7.160  
7.156  
7.152  
7.149  
7.133  
6.884  
6.864  
6.800  
6.781  
6.762  
6.731  
6.712  
6.693  
6.546  
6.526  
6.051  
6.046  
6.043  
6.038  
5.742  
5.722  
4.709  
4.370  
3.309  
2.990  
2.986  
2.980  
2.974  
2.965  
2.467  
1.615  
0.000

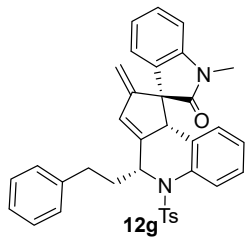

<sup>1</sup>H NMR (400 MHz, CDCl<sub>3</sub>)

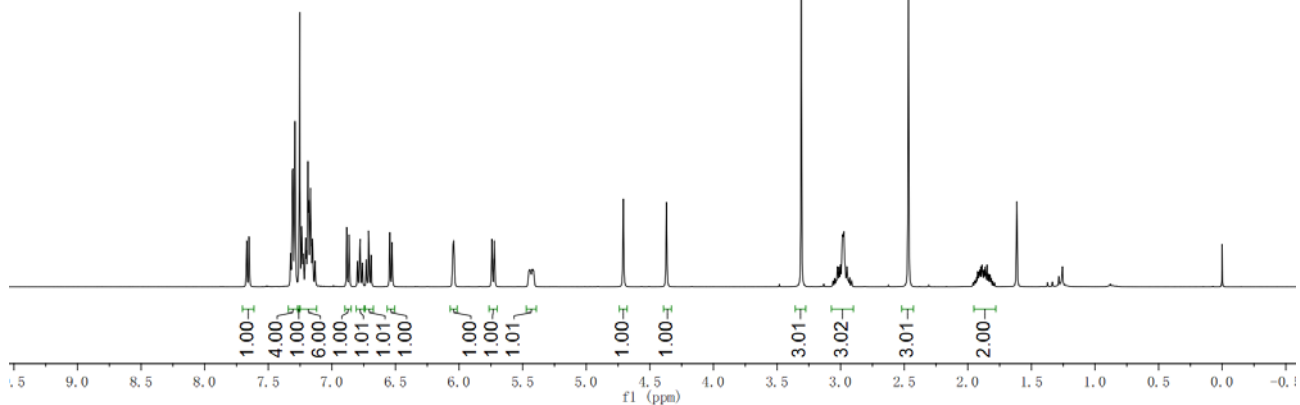

176.682  
154.965  
153.105  
145.014  
142.488  
141.383  
135.669  
134.203  
132.451  
131.621  
129.852  
129.723  
128.663  
128.505  
128.146  
126.901  
126.740  
126.624  
126.294  
126.067  
124.681  
122.724  
122.626  
108.480  
103.556  
77.374  
77.056  
76.739  
61.601  
56.666  
50.074  
40.338  
32.630  
26.697  
21.701

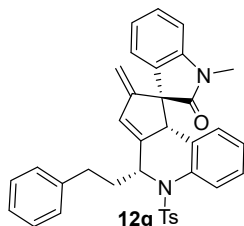

<sup>13</sup>C NMR (100 MHz, CDCl<sub>3</sub>)

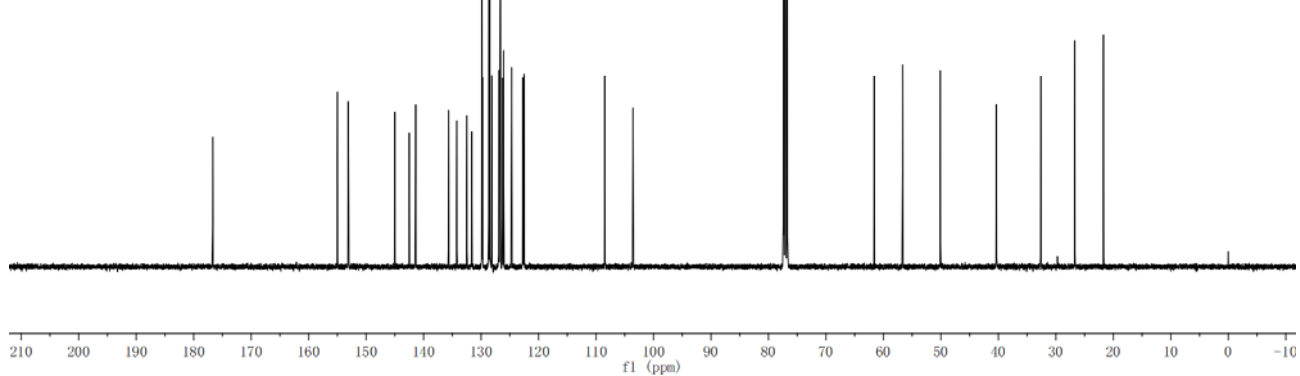

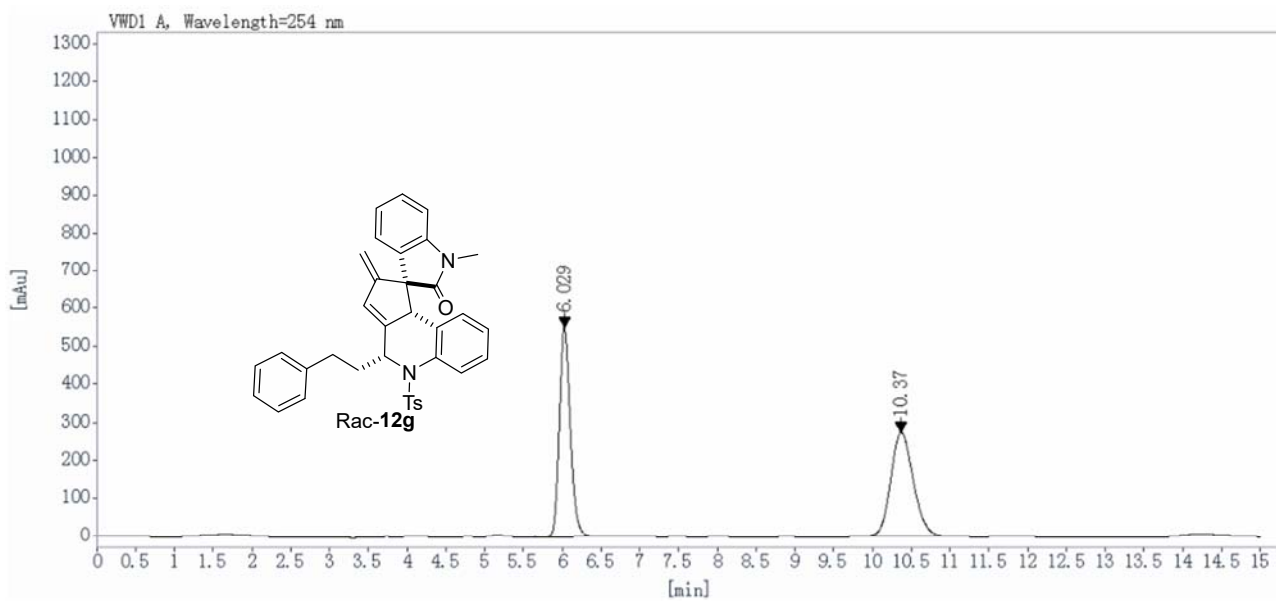

| Ret Time [min] | Peak Type | Width [min] | Height [mAU] | Area [mAU*s] | Area [%] |
|----------------|-----------|-------------|--------------|--------------|----------|
| 6.029          | BBA       | 0.15        | 551.4871     | 5511.3047    | 49.7055  |
| 10.370         | BBA       | 0.31        | 276.2112     | 5576.6040    | 50.2945  |
| Totals:        |           |             |              | 11087.9087   | 100.0000 |

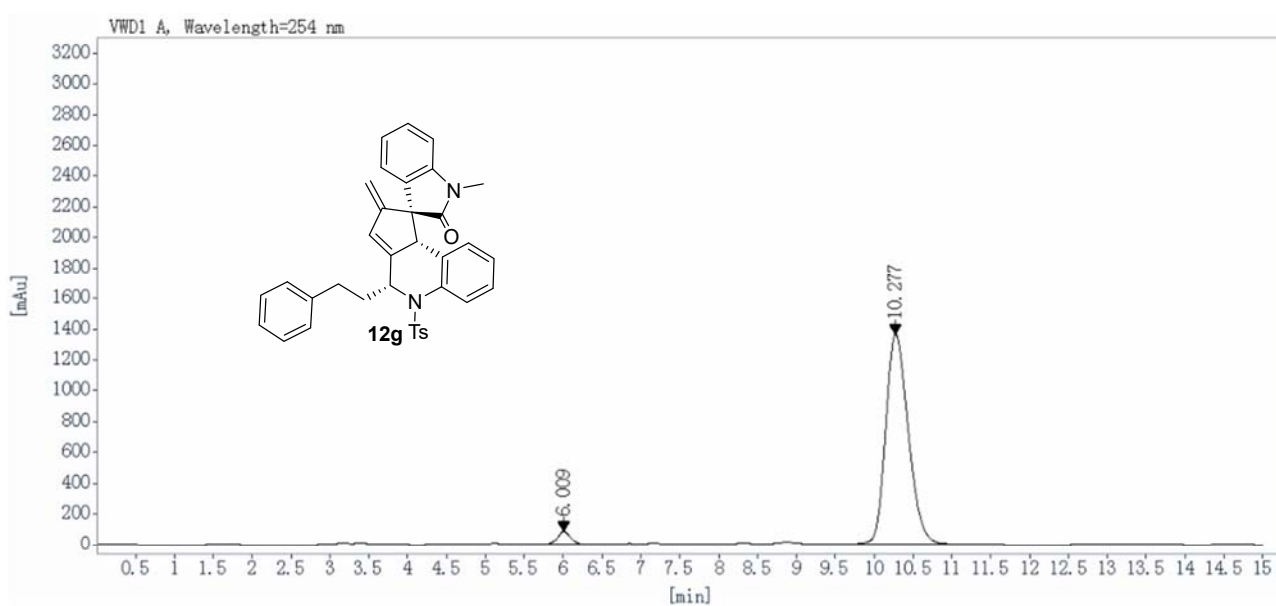

| Ret Time [min] | Peak Type | Width [min] | Height [mAU] | Area [mAU*s] | Area [%] |
|----------------|-----------|-------------|--------------|--------------|----------|
| 6.009          | BBA       | 0.17        | 85.6434      | 1001.8586    | 3.5056   |
| 10.277         | BBA       | 0.31        | 1364.2518    | 27576.8809   | 96.4944  |
| Totals:        |           |             |              | 28578.7395   | 100.0000 |

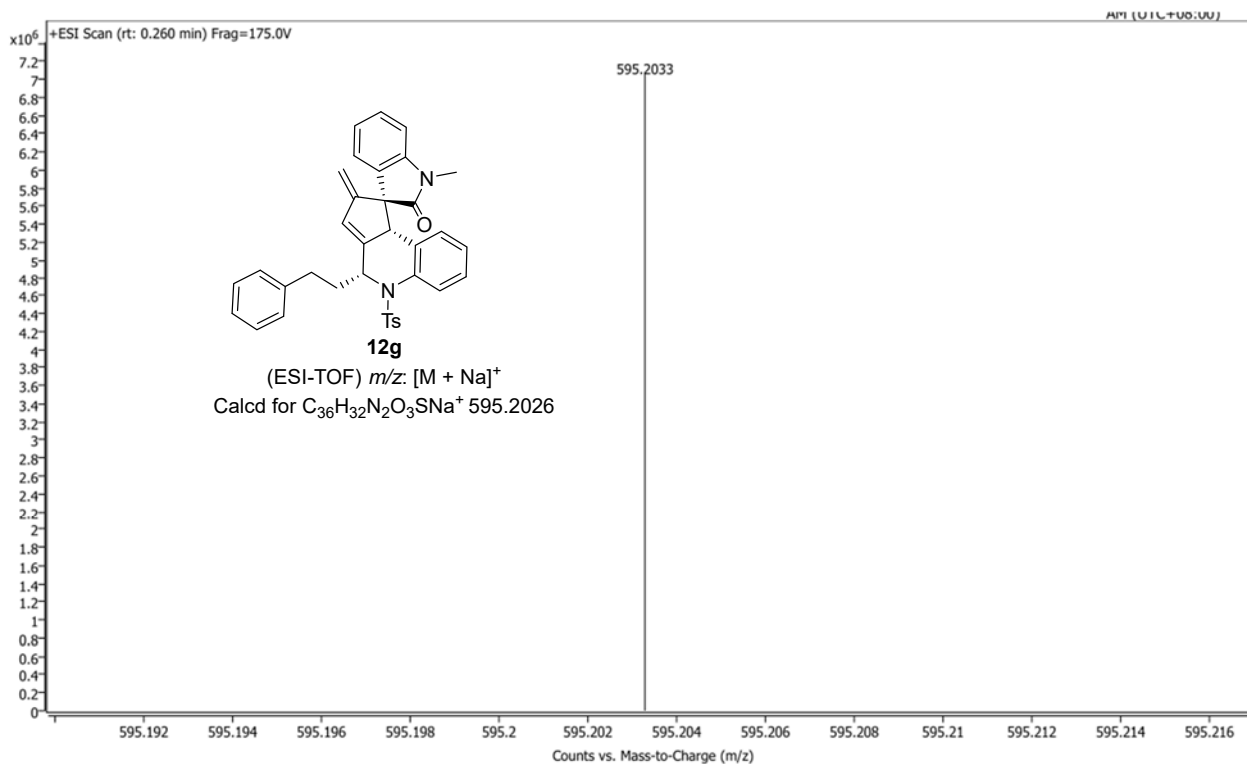

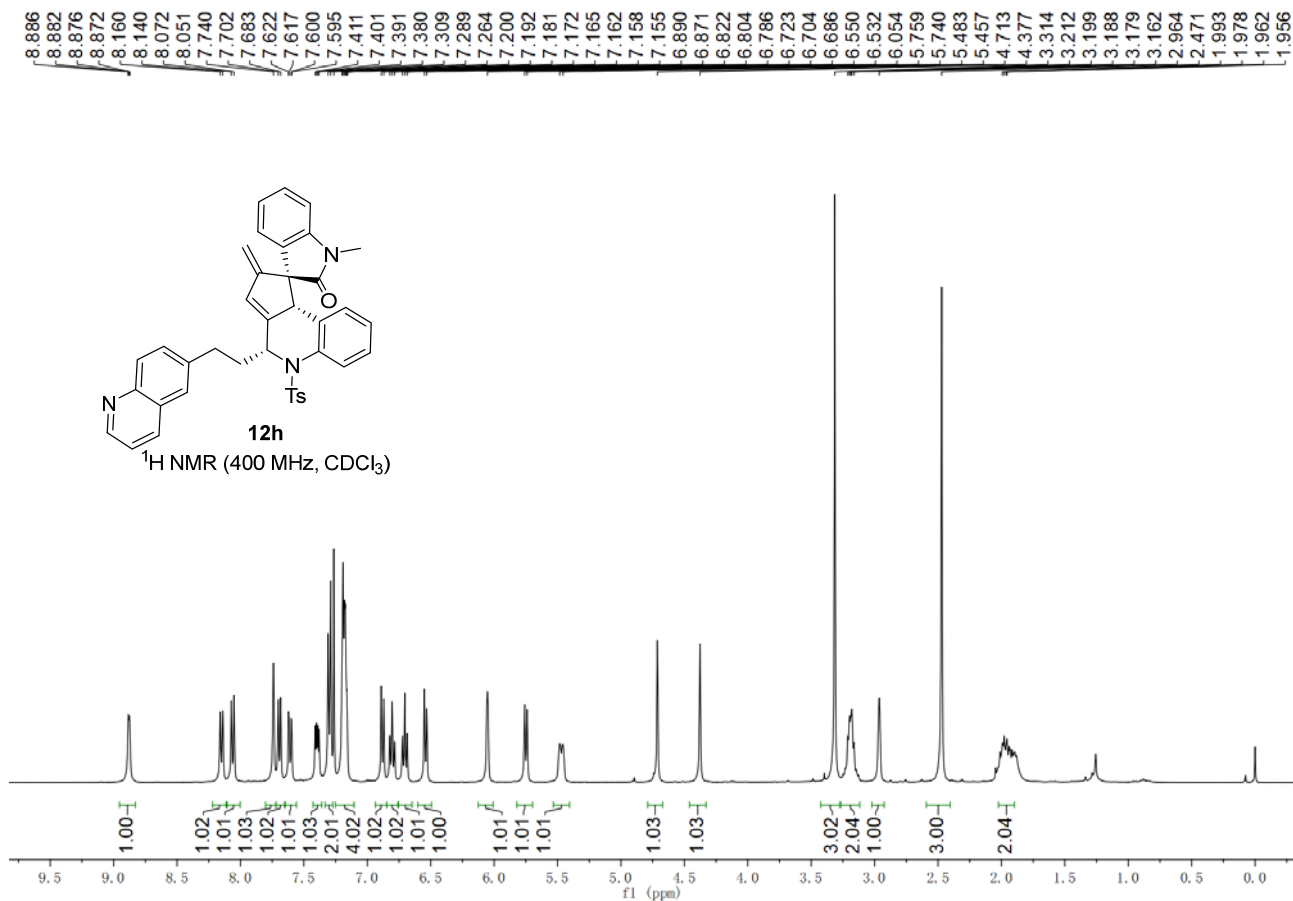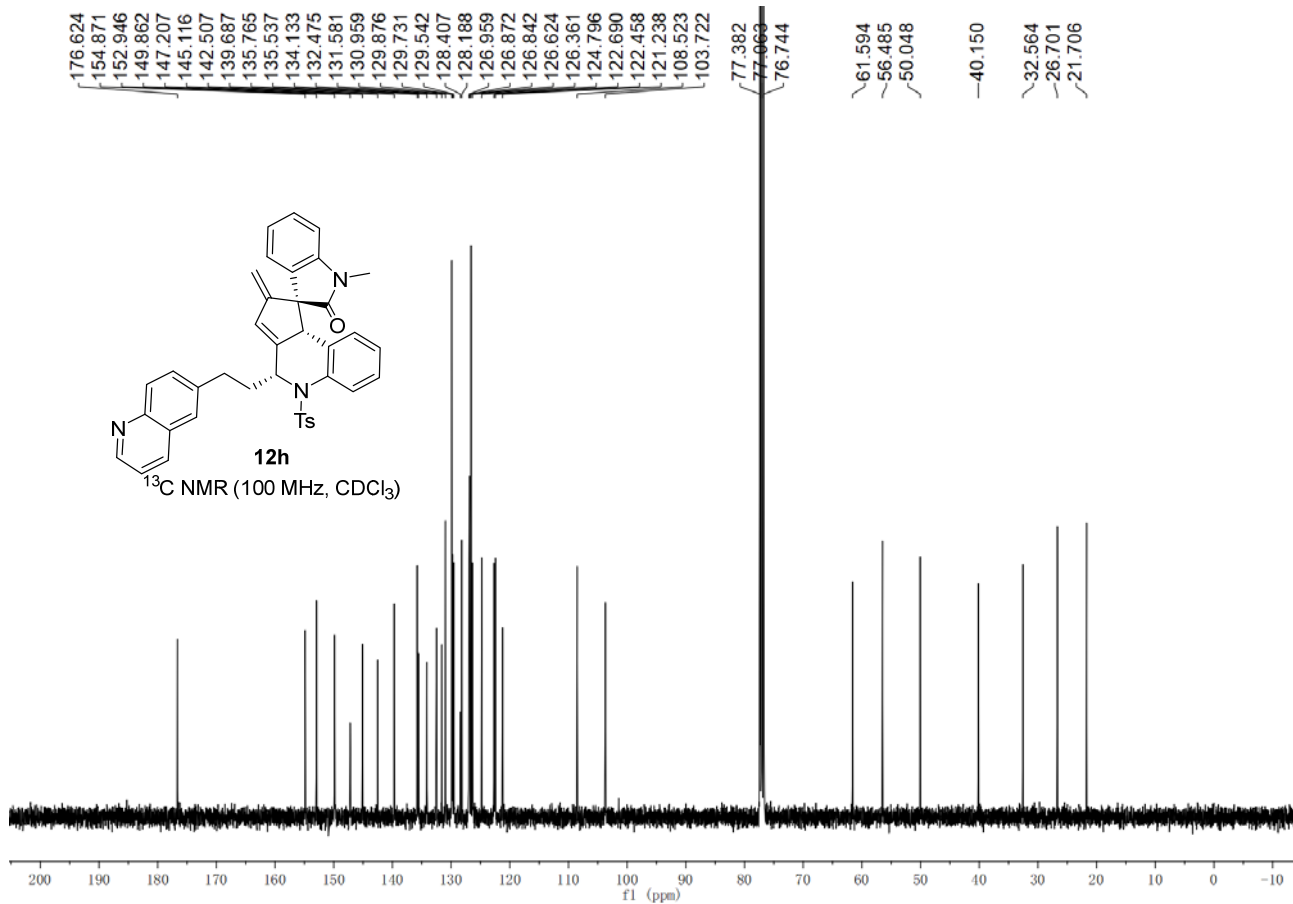

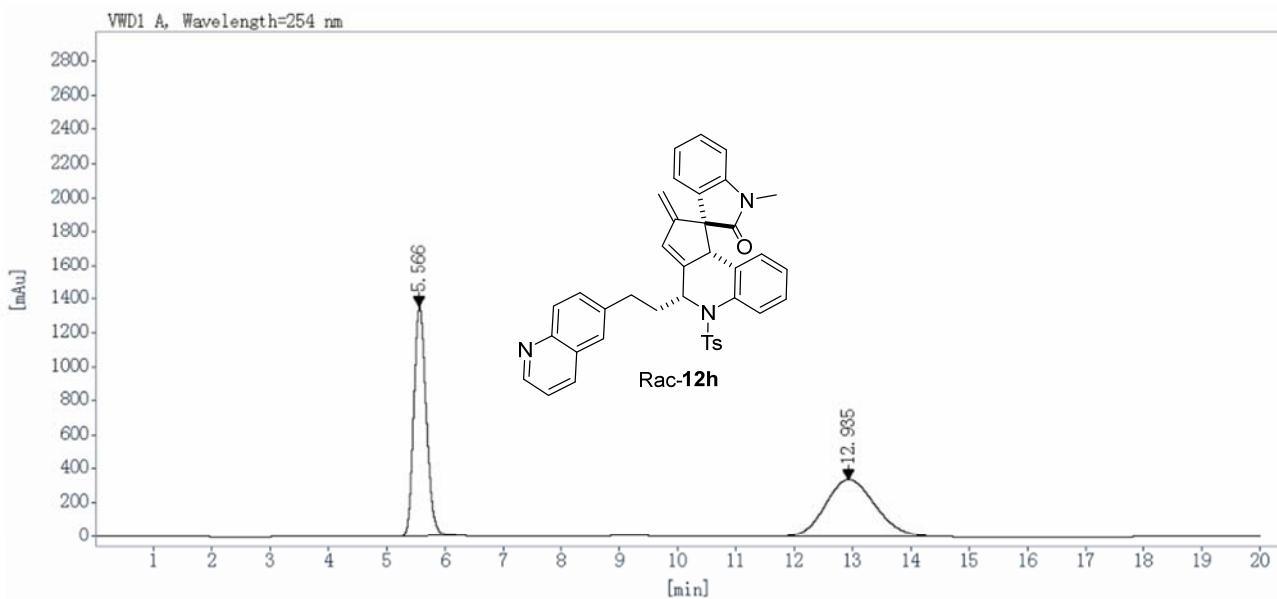

| Ret Time [min] | Peak Type | Width [min] | Height [mAU] | Area [mAU*s] | Area [%] |
|----------------|-----------|-------------|--------------|--------------|----------|
| 5.566          | BBA       | 0.23        | 1352.6578    | 20139.9414   | 50.0449  |
| 12.935         | BBA       | 0.93        | 338.6057     | 20103.8398   | 49.9551  |
| Totals:        |           |             |              | 40243.7813   | 100.0000 |

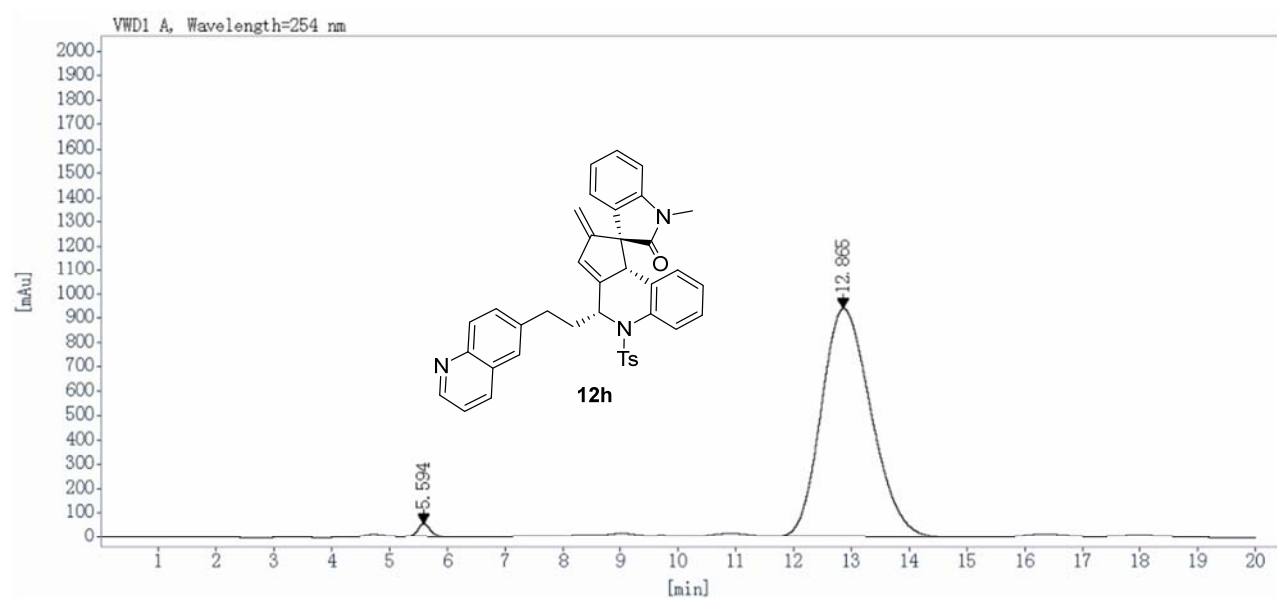

| Ret Time [min] | Peak Type | Width [min] | Height [mAU] | Area [mAU*s] | Area [%] |
|----------------|-----------|-------------|--------------|--------------|----------|
| 5.594          | BBA       | 0.24        | 53.7615      | 821.4728     | 1.4394   |
| 12.865         | BBA       | 0.94        | 937.7807     | 56249.4727   | 98.5606  |
| Totals:        |           |             |              | 57070.9454   | 100.0000 |

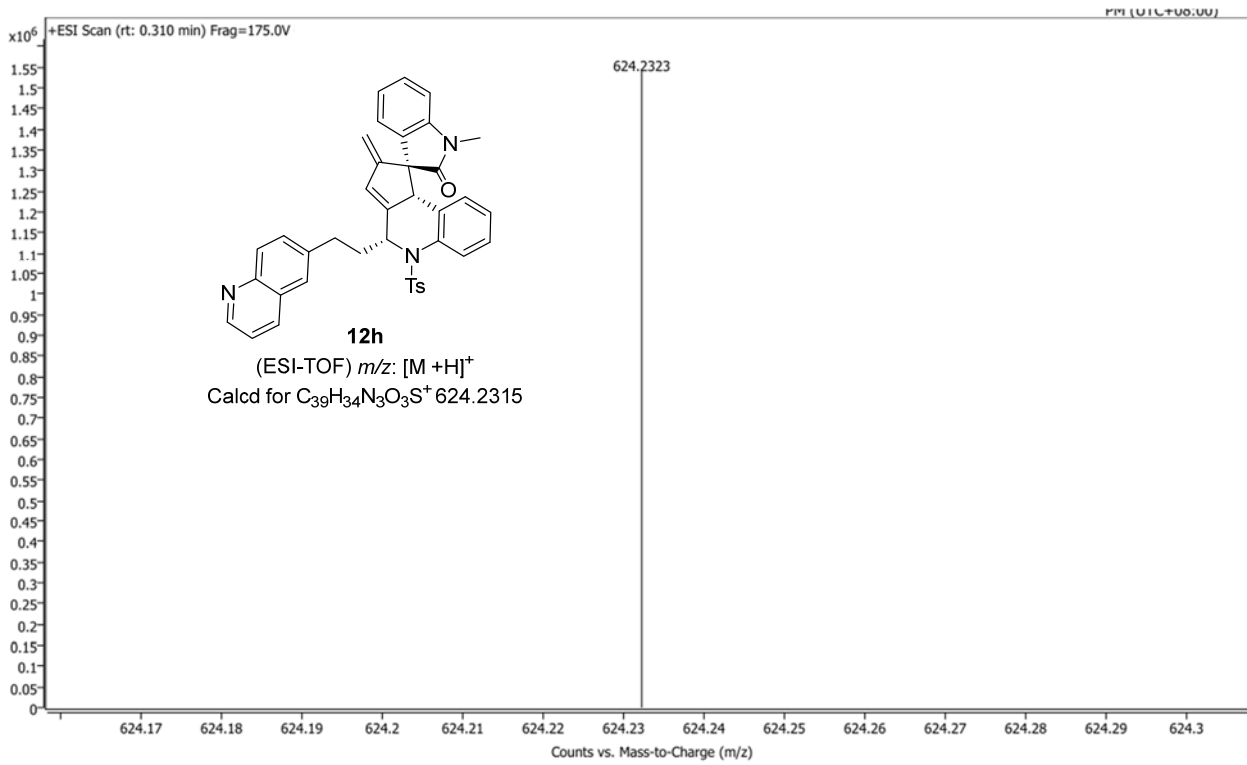

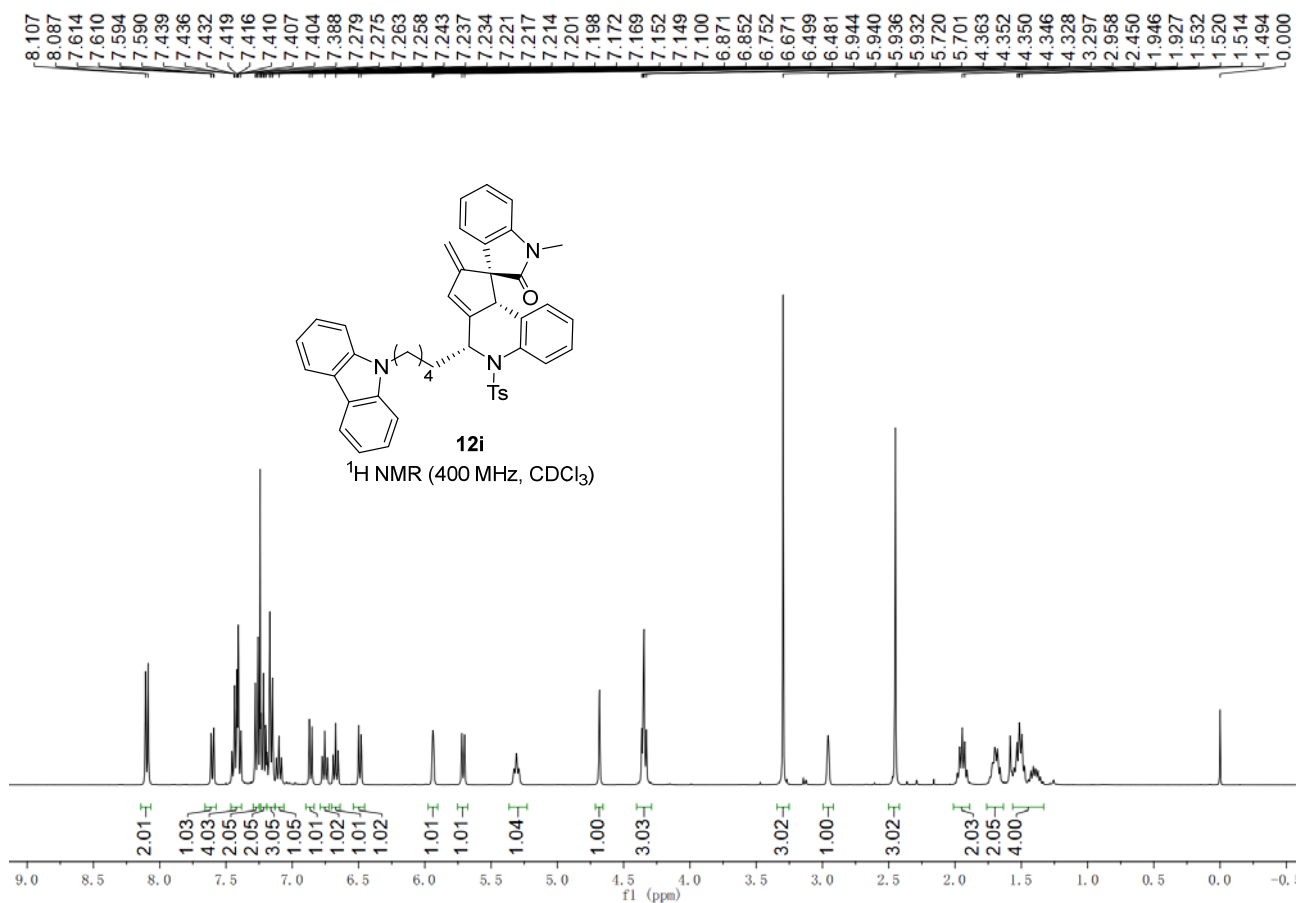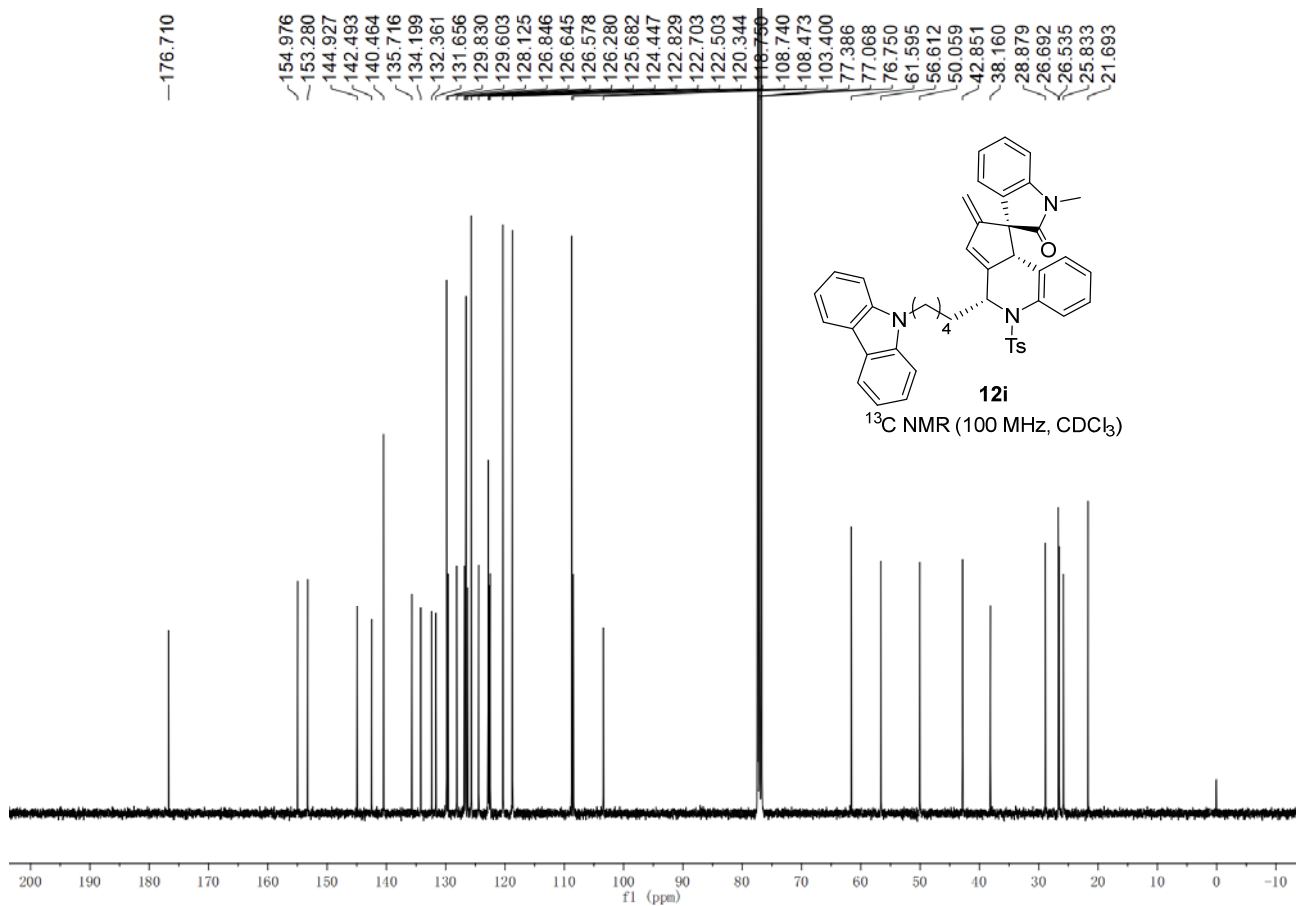

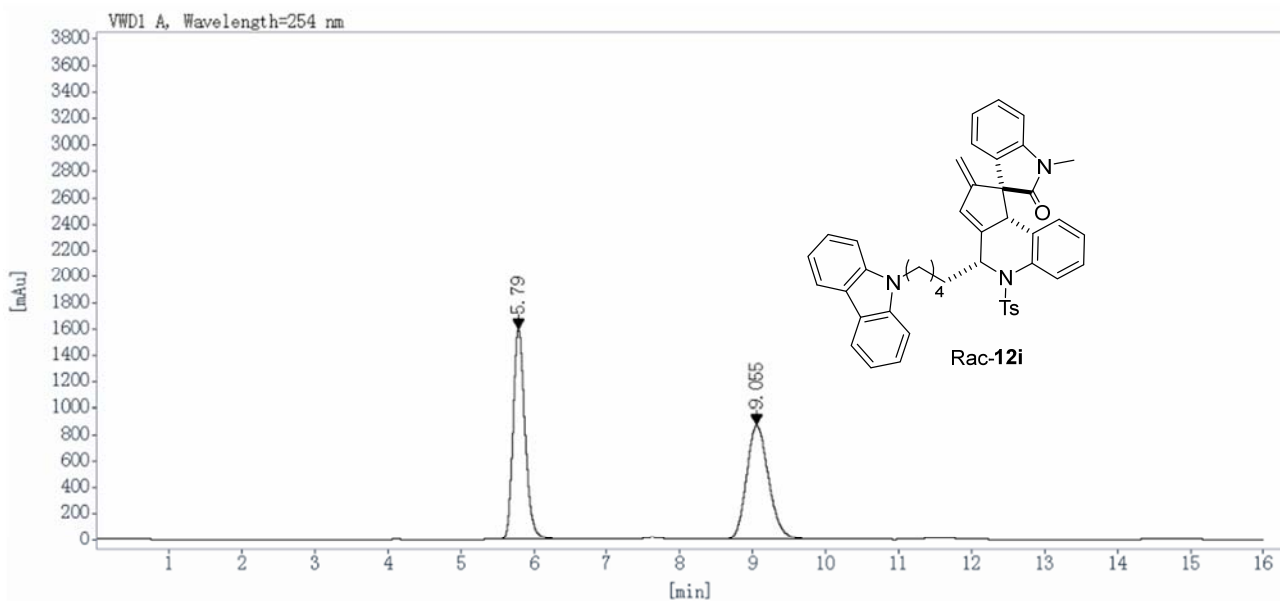

| Ret Time [min] | Peak Type | Width [min] | Height [mAU] | Area [mAU*s] | Area [%] |
|----------------|-----------|-------------|--------------|--------------|----------|
| 5.790          | BBA       | 0.18        | 1591.1262    | 18135.9199   | 49.7910  |
| 9.055          | BBA       | 0.33        | 869.1802     | 18288.1602   | 50.2090  |
| Totals:        |           |             |              | 36424.0801   | 100.0000 |

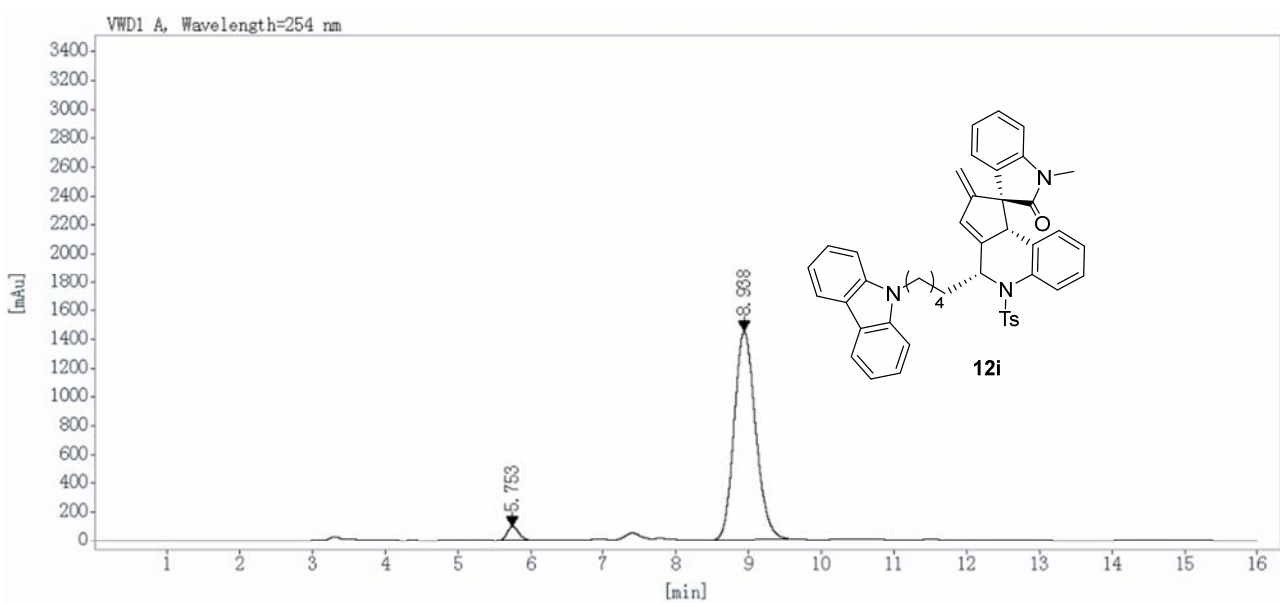

| Ret Time [min] | Peak Type | Width [min] | Height [mAU] | Area [mAU*s] | Area [%] |
|----------------|-----------|-------------|--------------|--------------|----------|
| 5.753          | BBA       | 0.17        | 99.4315      | 1099.3254    | 3.5334   |
| 8.938          | BBA       | 0.32        | 1450.0912    | 30013.2988   | 96.4666  |
| Totals:        |           |             |              | 31112.6243   | 100.0000 |



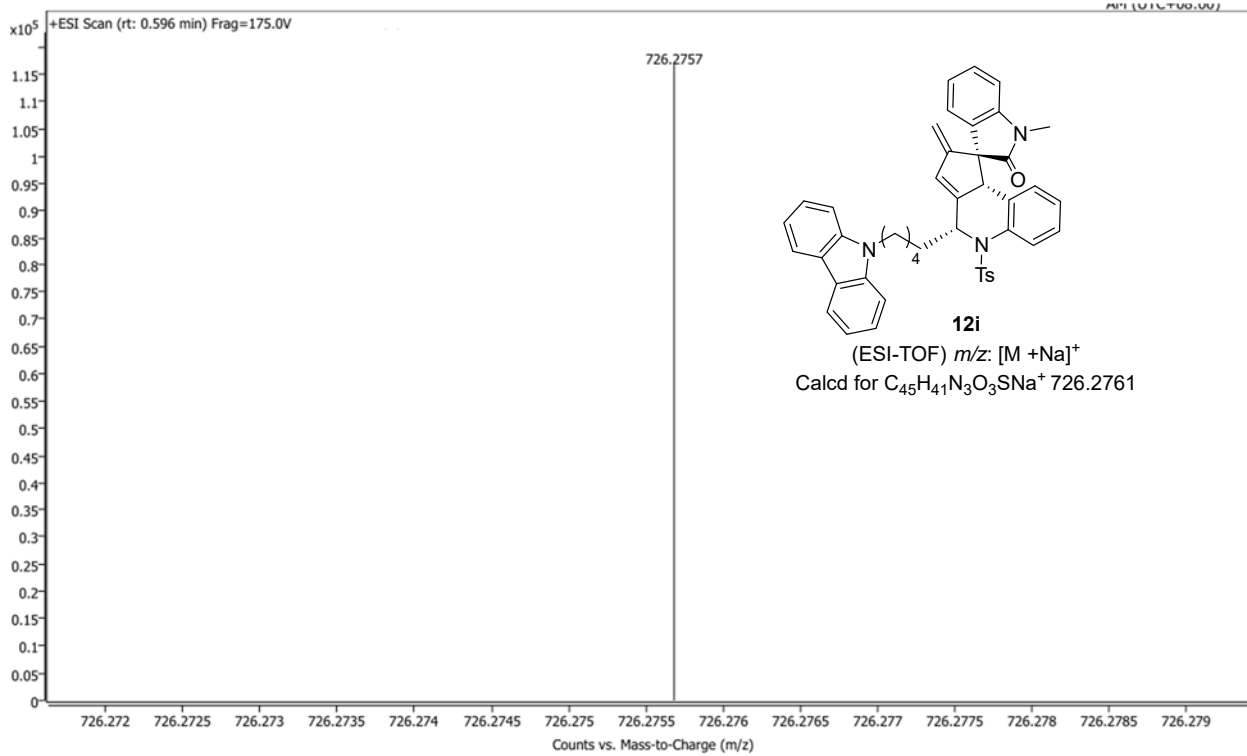

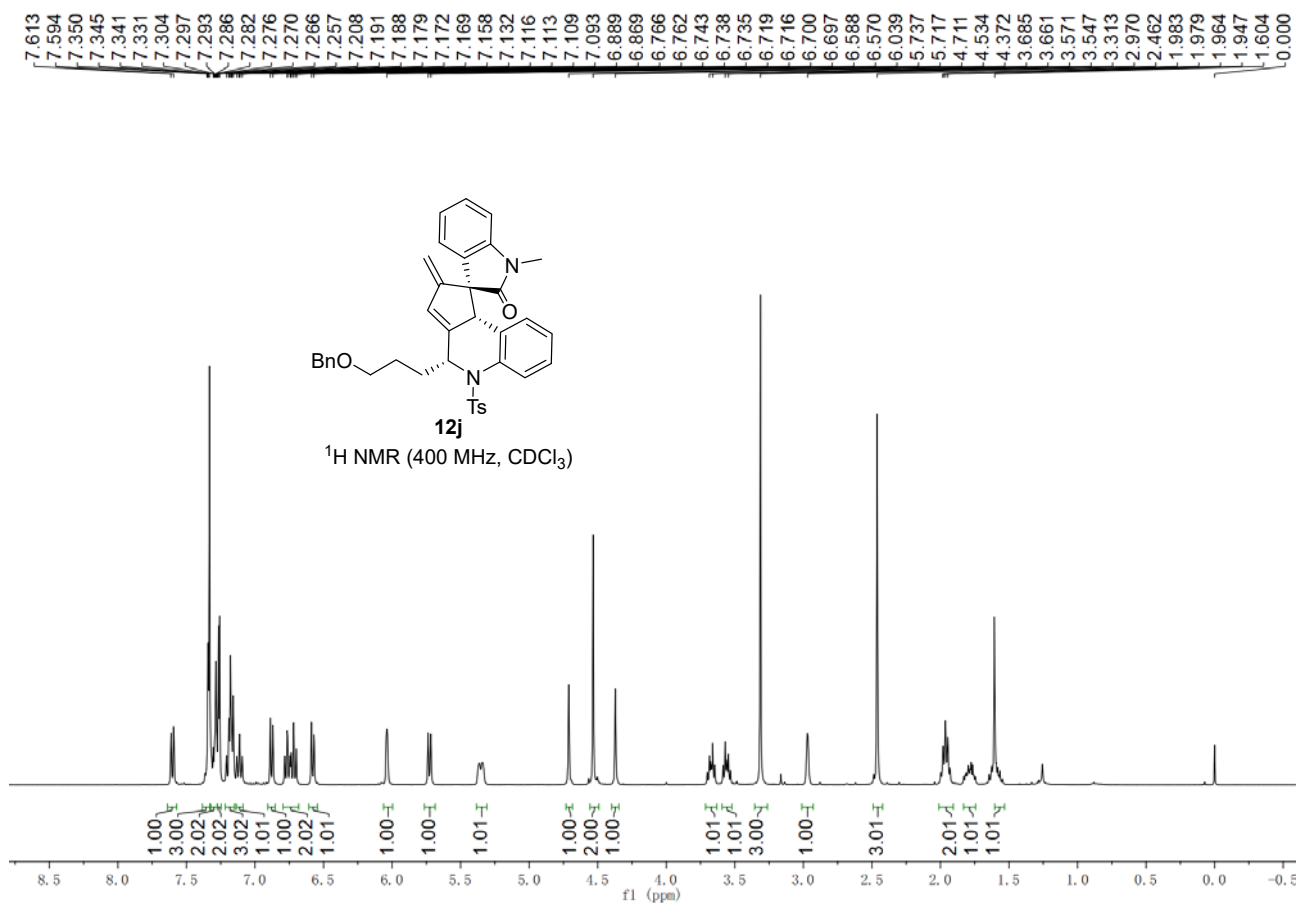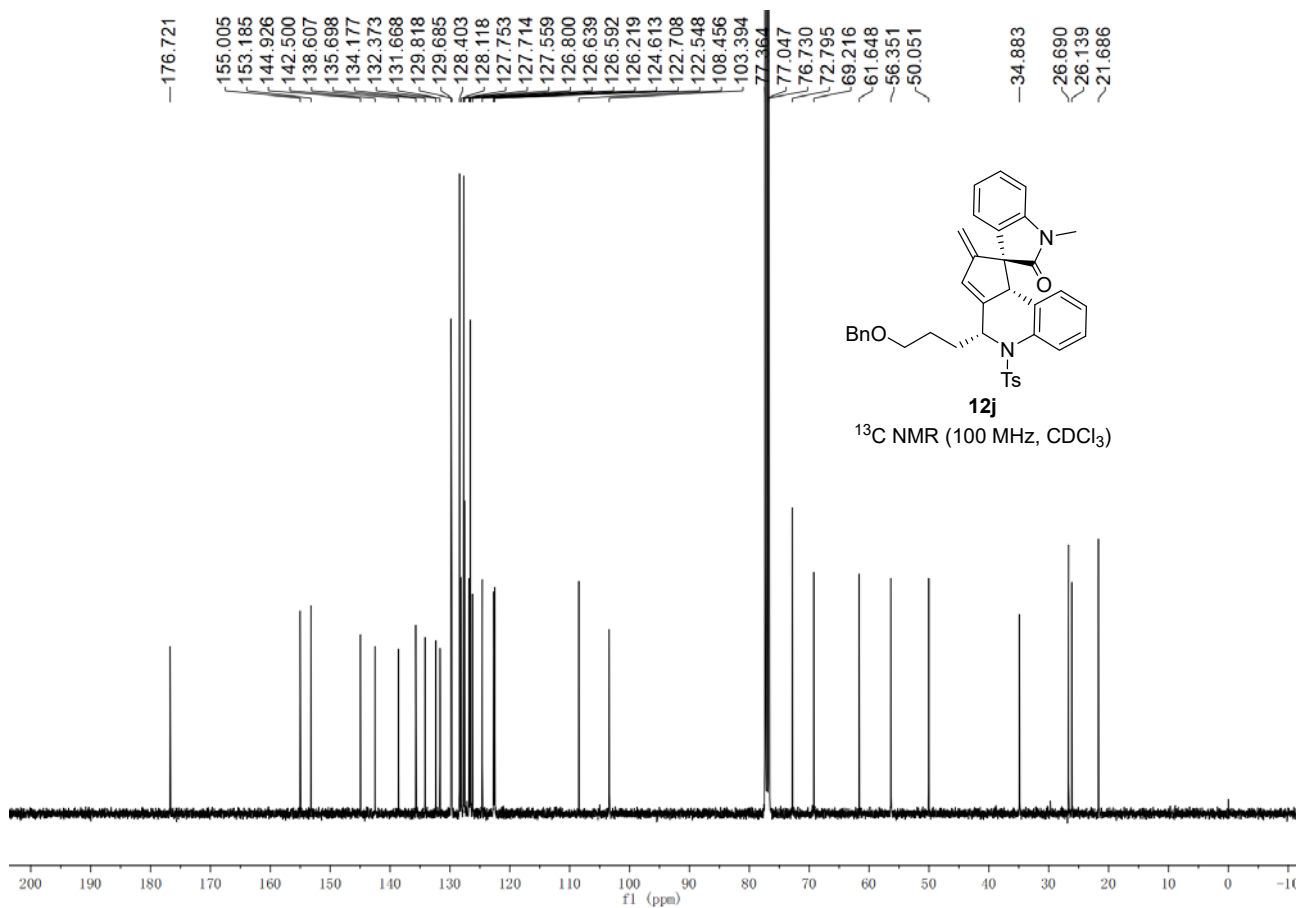

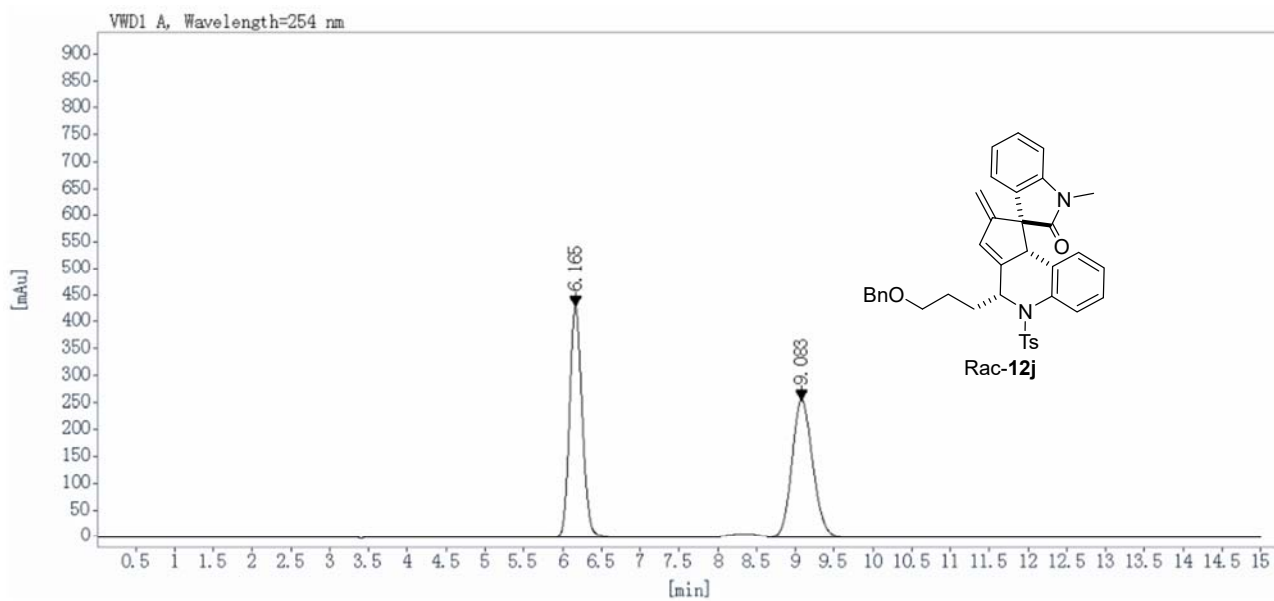

| Ret Time [min] | Peak Type | Width [min] | Height [mAU] | Area [mAU*s] | Area [%] |
|----------------|-----------|-------------|--------------|--------------|----------|
| 6.165          | BBA       | 0.17        | 428.2721     | 4798.7588    | 50.1795  |
| 9.083          | BBA       | 0.29        | 254.8855     | 4764.4277    | 49.8205  |
| Totals:        |           |             |              | 9563.1865    | 100.0000 |

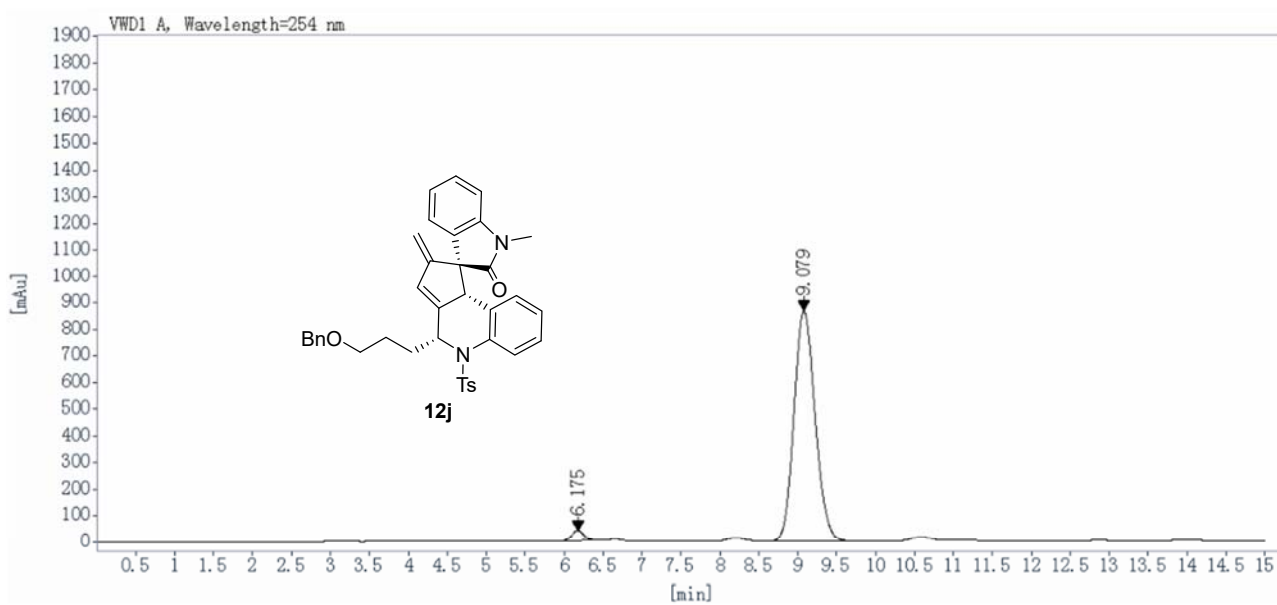

| Ret Time [min] | Peak Type | Width [min] | Height [mAU] | Area [mAU*s] | Area [%] |
|----------------|-----------|-------------|--------------|--------------|----------|
| 6.175          | BB        | 0.17        | 39.0287      | 438.8946     | 2.6057   |
| 9.079          | BBA       | 0.30        | 865.3759     | 16404.4570   | 97.3943  |
| Totals:        |           |             |              | 16843.3516   | 100.0000 |

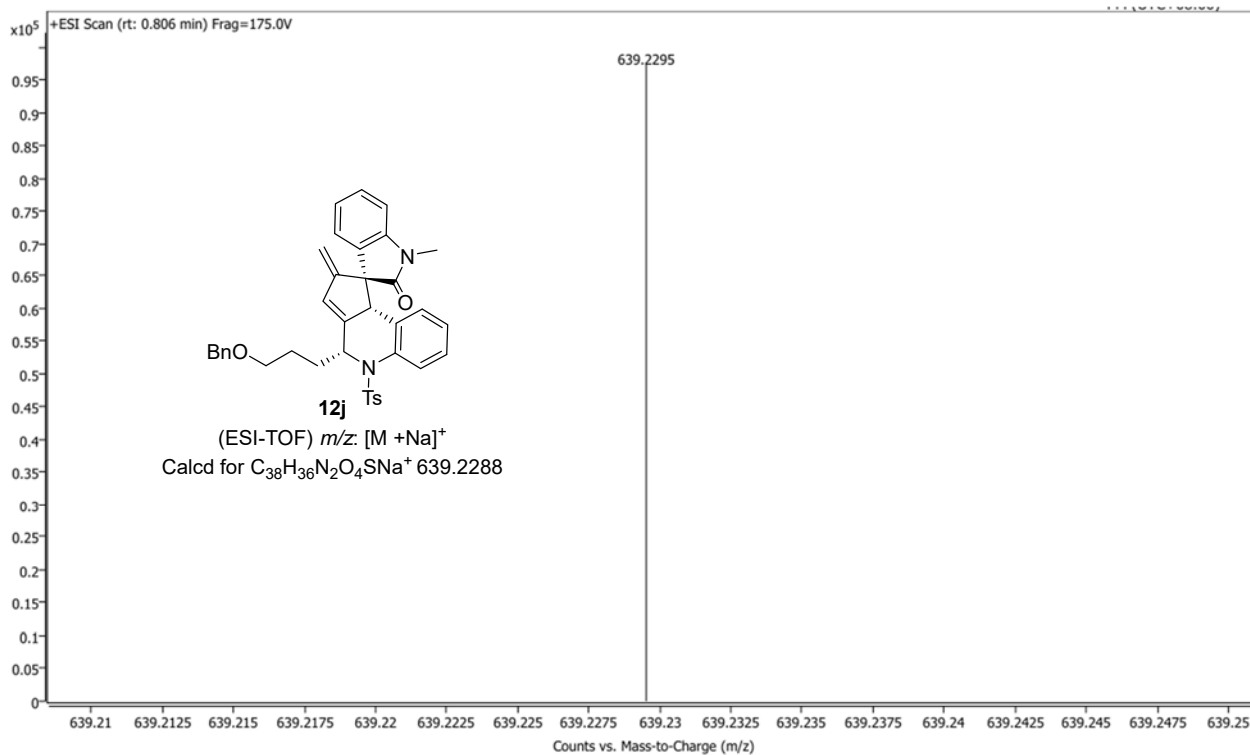

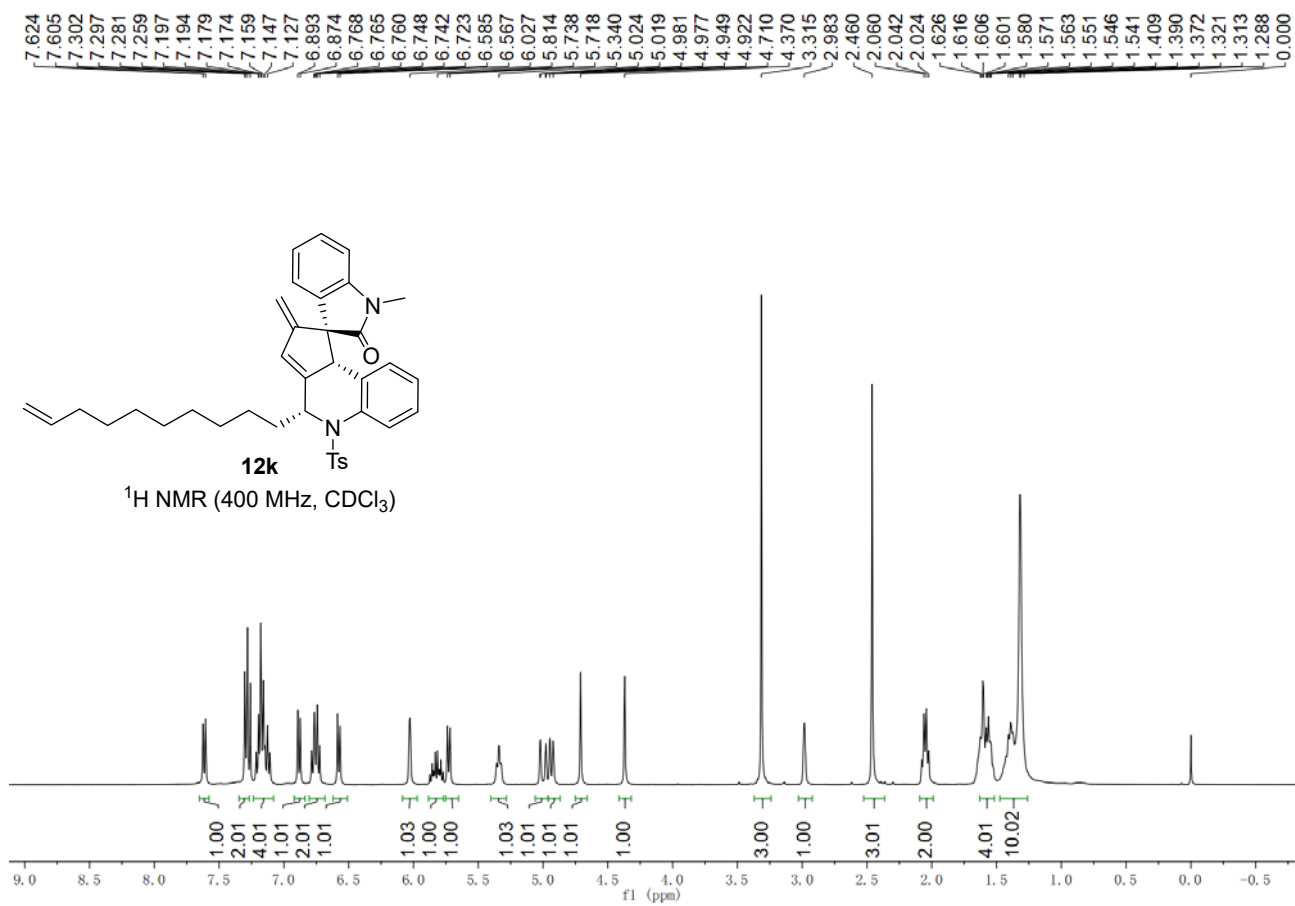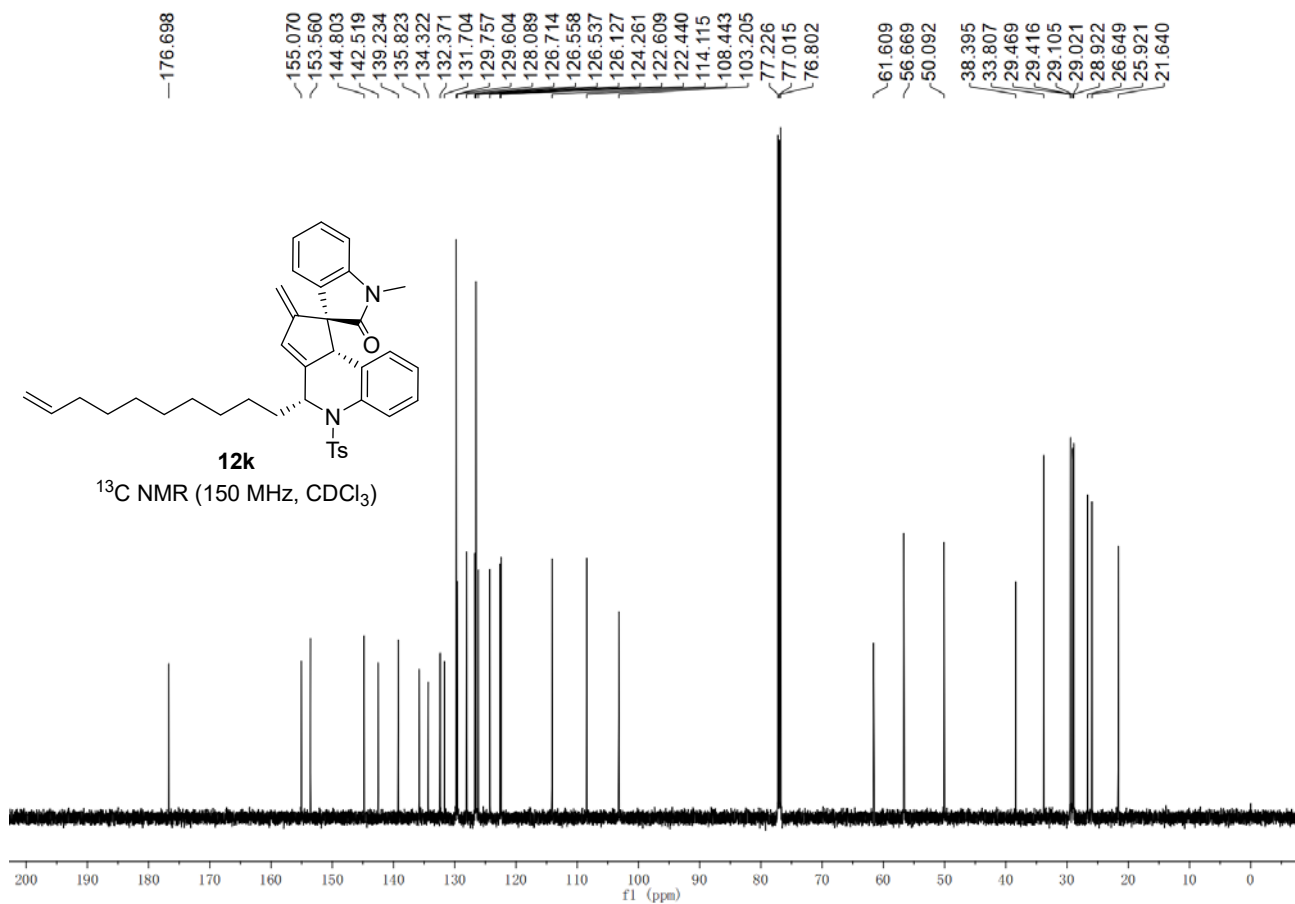

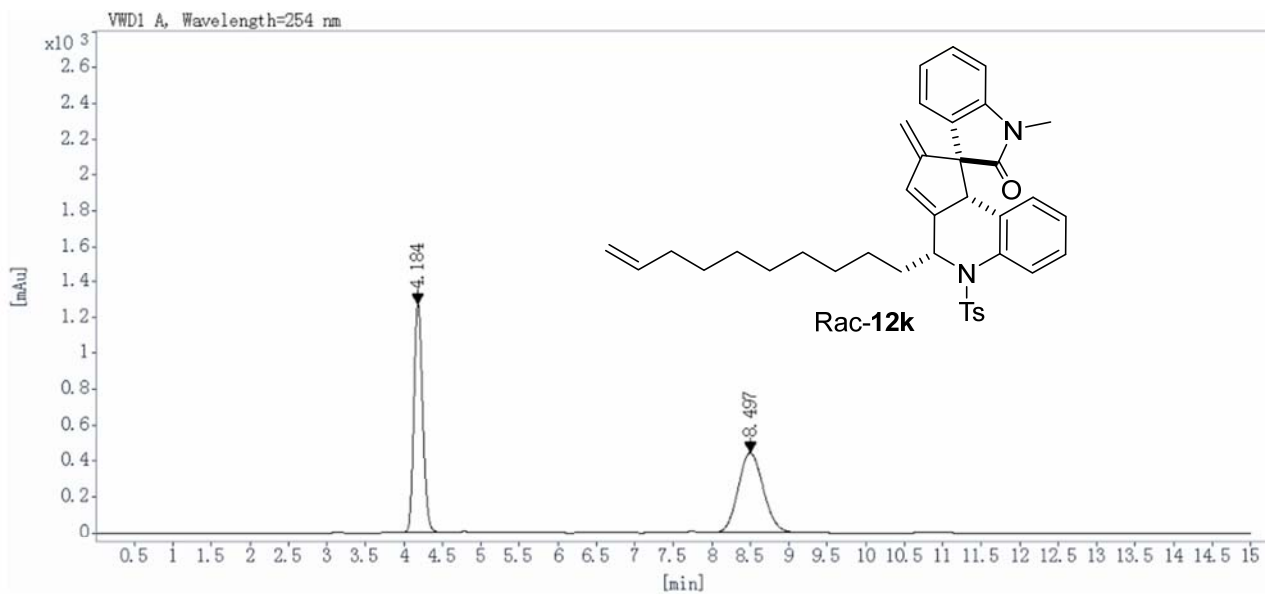

| Ret Time [min] | Peak Type | Width [min] | Height [mAU] | Area [mAU*s] | Area [%] |
|----------------|-----------|-------------|--------------|--------------|----------|
| 4.184          | BBA       | 0.12        | 1273.7031    | 10044.6152   | 49.9861  |
| 8.497          | BBA       | 0.35        | 443.9998     | 10050.2139   | 50.0139  |
| Totals:        |           |             |              | 20094.8291   | 100.0000 |

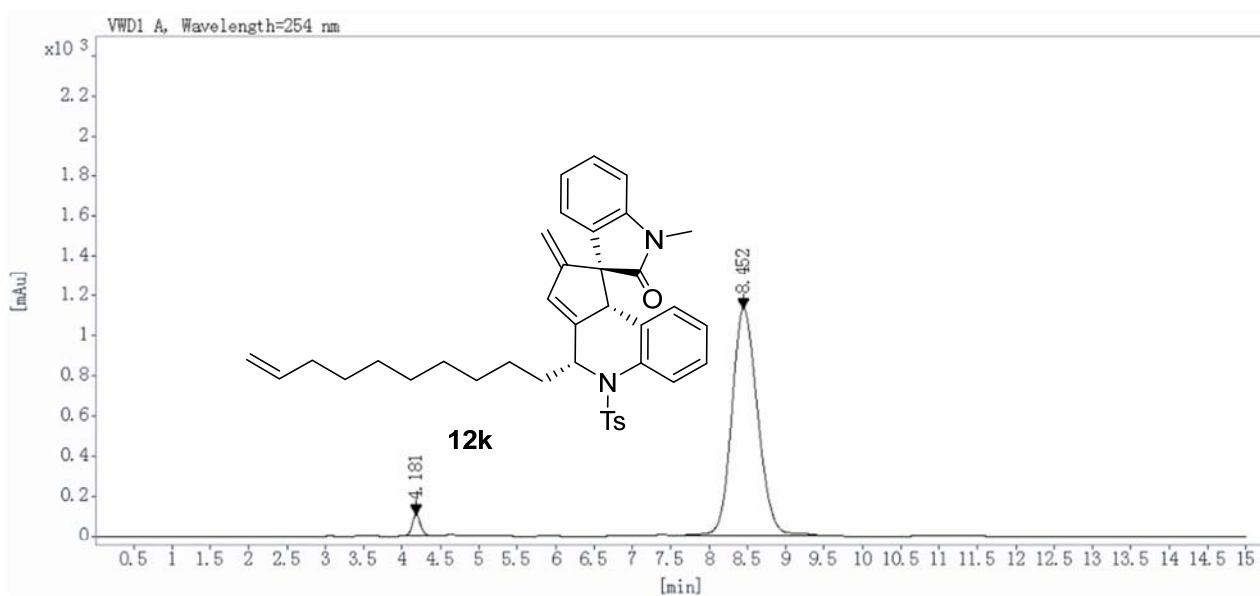

| Ret Time [min] | Peak Type | Width [min] | Height [mAU] | Area [mAU*s] | Area [%] |
|----------------|-----------|-------------|--------------|--------------|----------|
| 4.181          | BB        | 0.12        | 104.9507     | 822.0416     | 2.9815   |
| 8.452          | BB        | 0.37        | 1132.7063    | 26749.0391   | 97.0185  |
| Totals:        |           |             |              | 27571.0807   | 100.0000 |

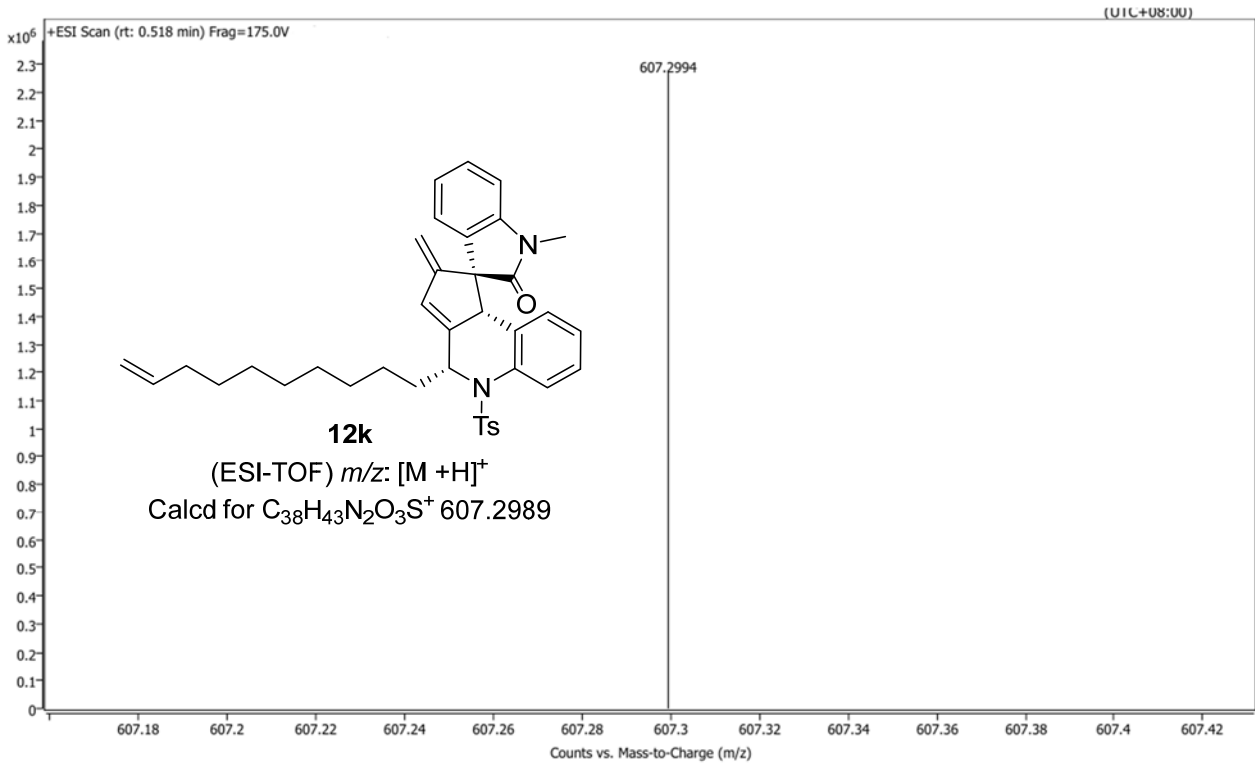

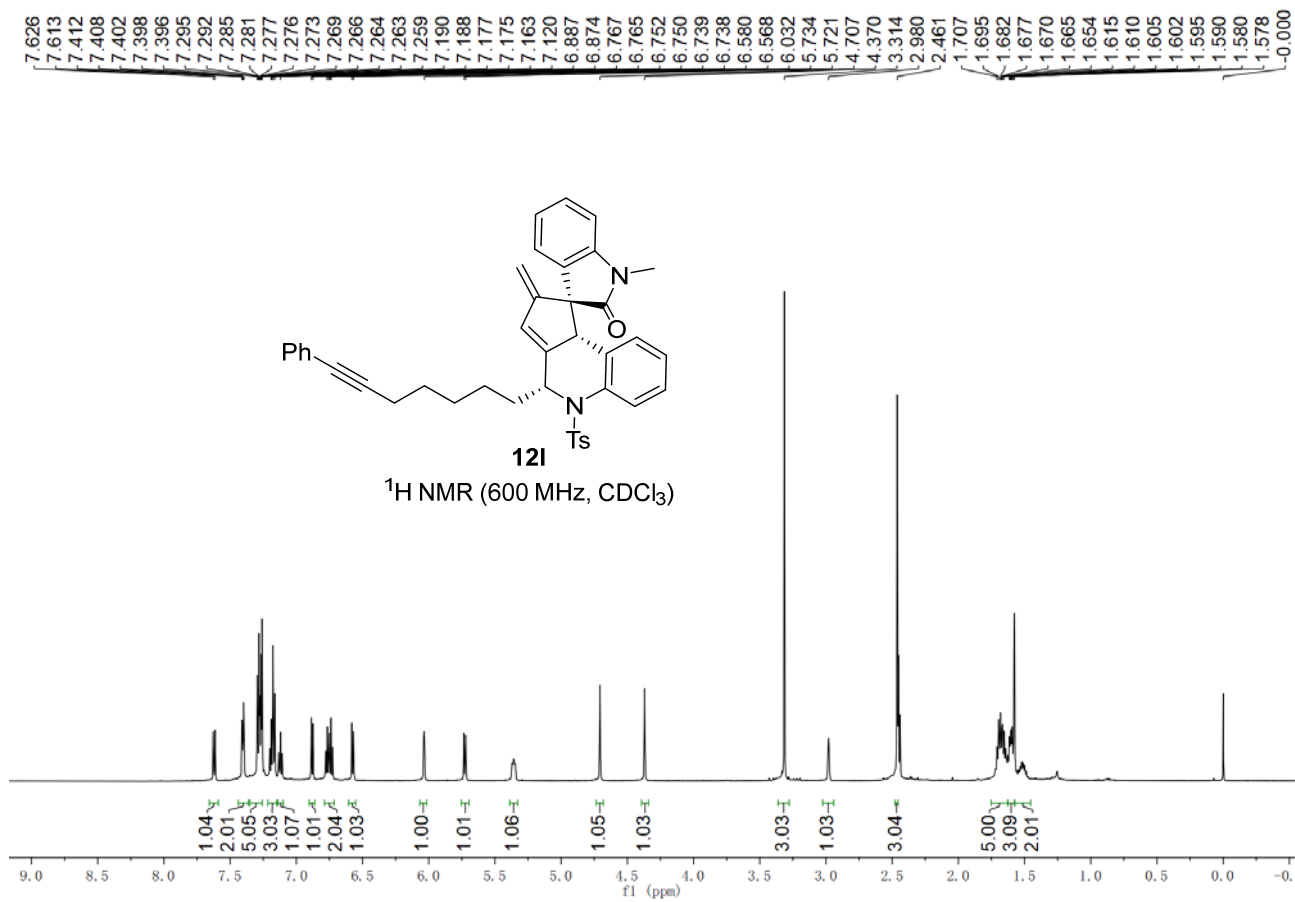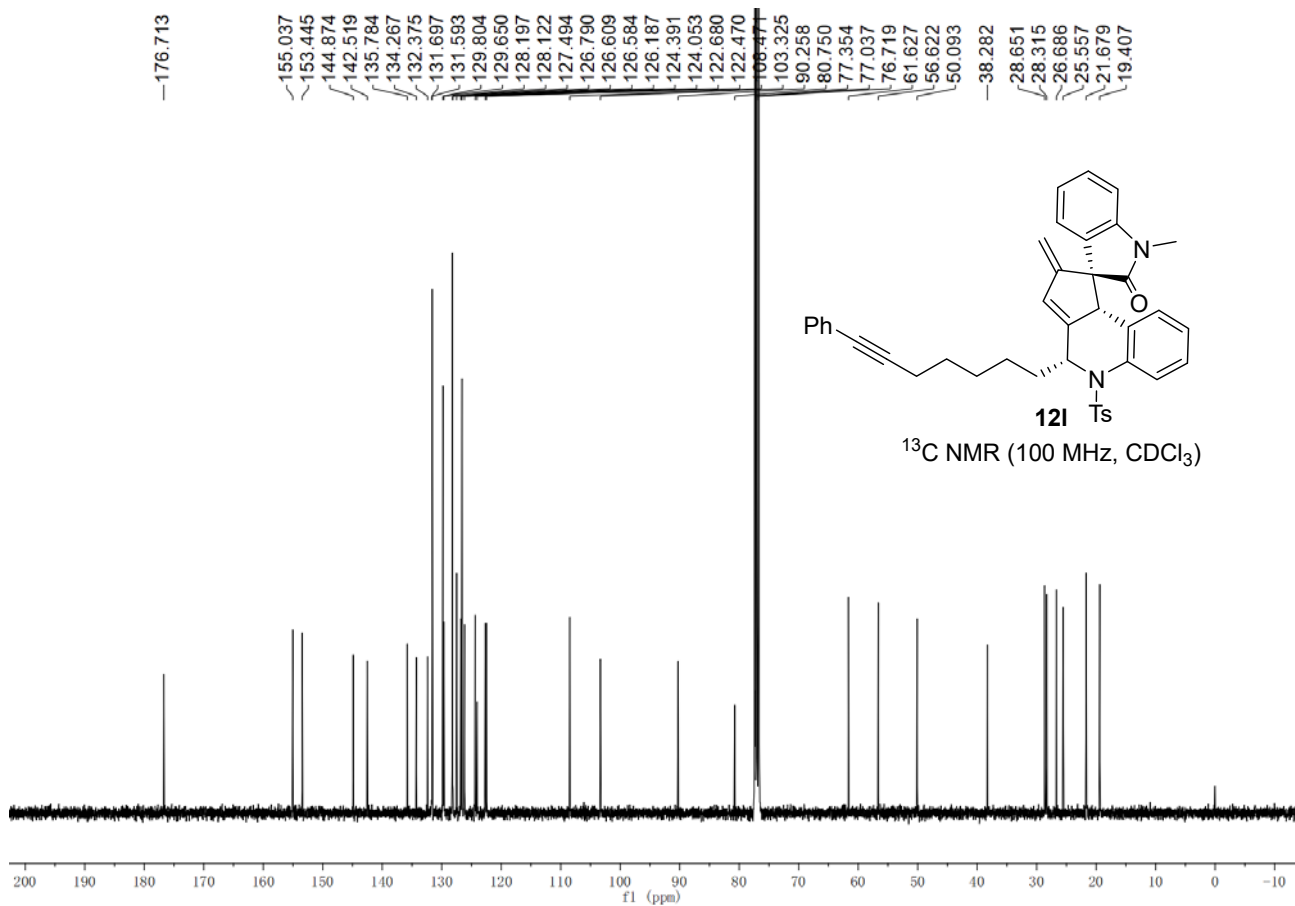



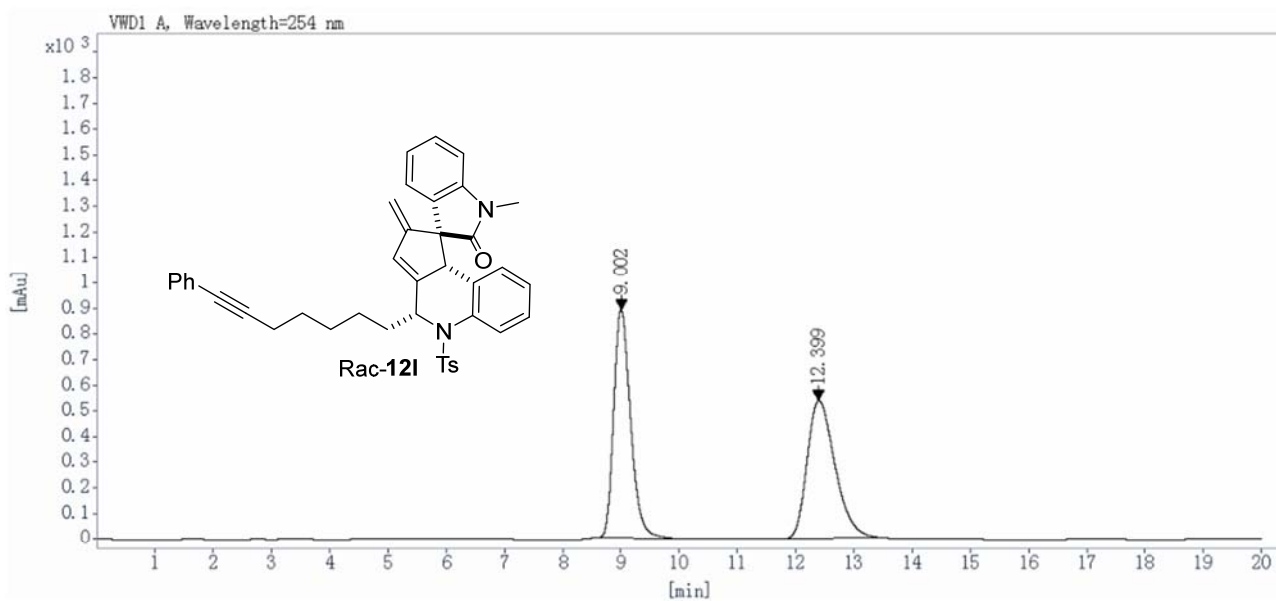

| Ret Time [min] | Peak Type | Width [min] | Height [mAU] | Area [mAU*s] | Area [%] |
|----------------|-----------|-------------|--------------|--------------|----------|
| 9.002          | BBA       | 0.31        | 891.9315     | 17841.7578   | 49.6578  |
| 12.399         | BBA       | 0.52        | 540.7164     | 18087.6445   | 50.3422  |
| Totals:        |           |             |              | 35929.4023   | 100.0000 |

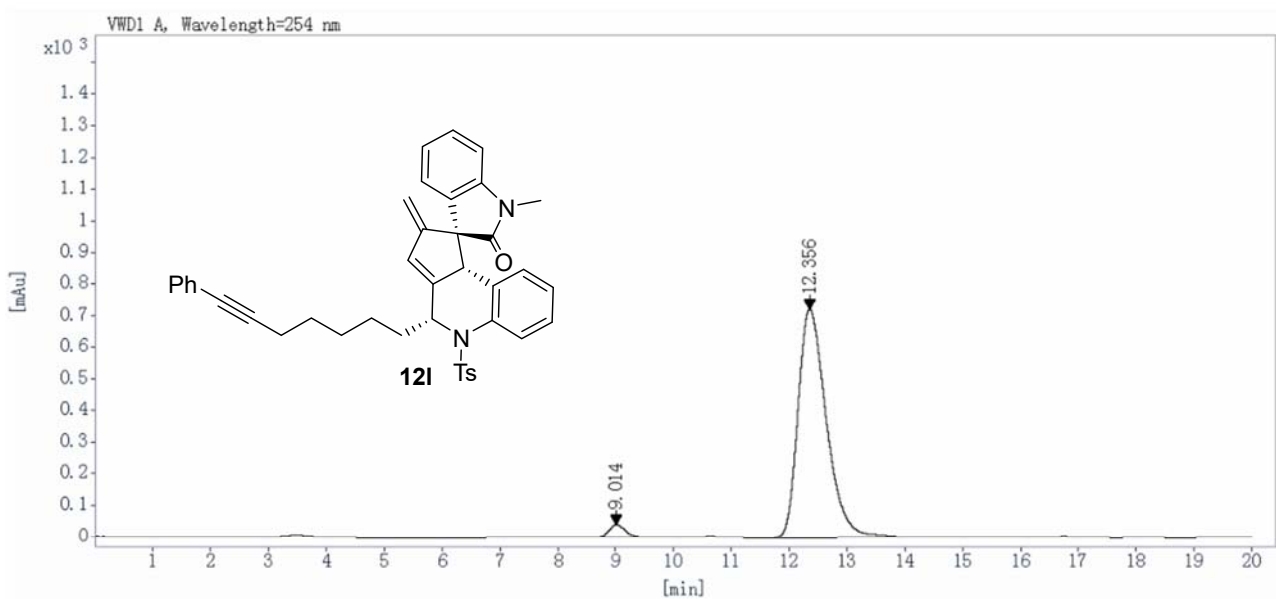

| Ret Time [min] | Peak Type | Width [min] | Height [mAU] | Area [mAU*s] | Area [%] |
|----------------|-----------|-------------|--------------|--------------|----------|
| 9.014          | BBA       | 0.29        | 40.3394      | 763.8903     | 3.0236   |
| 12.356         | BBA       | 0.52        | 721.9957     | 24500.3711   | 96.9764  |
| Totals:        |           |             |              | 25264.2614   | 100.0000 |

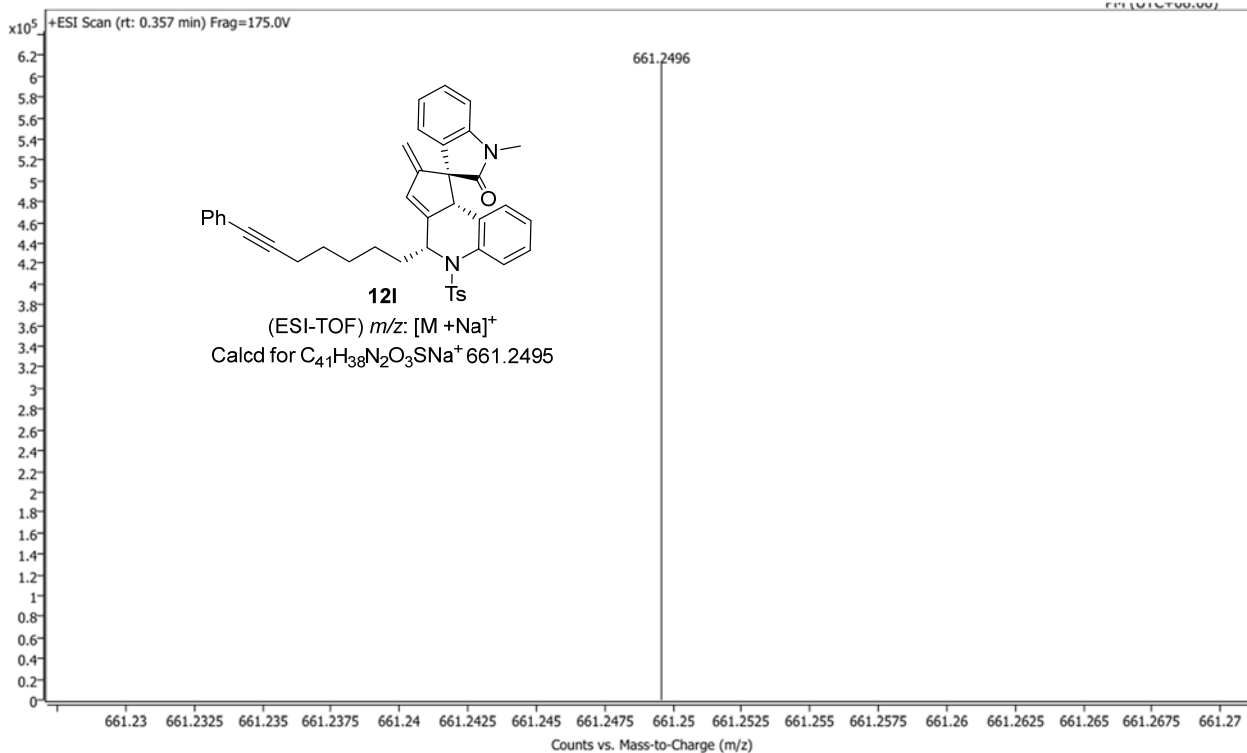

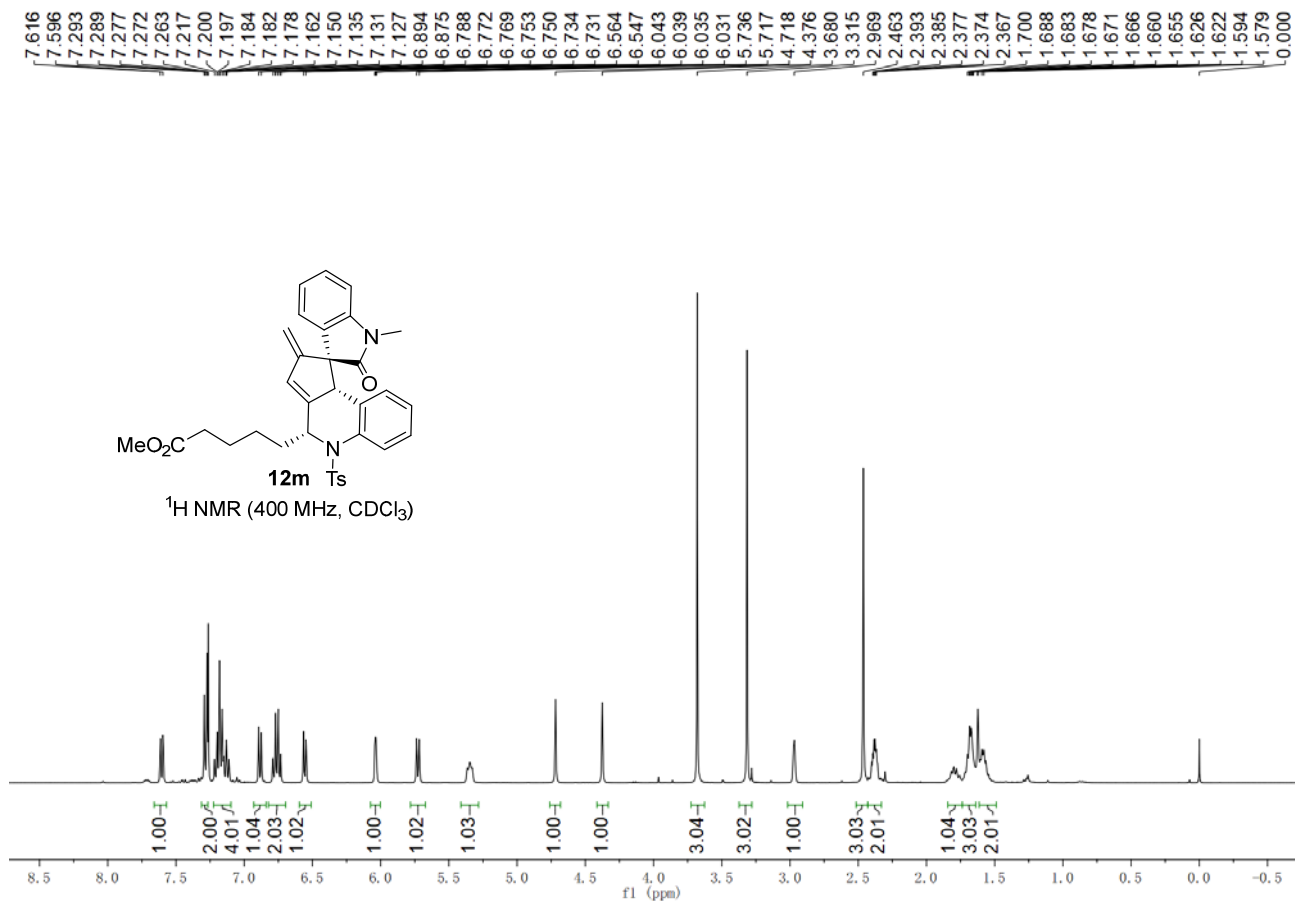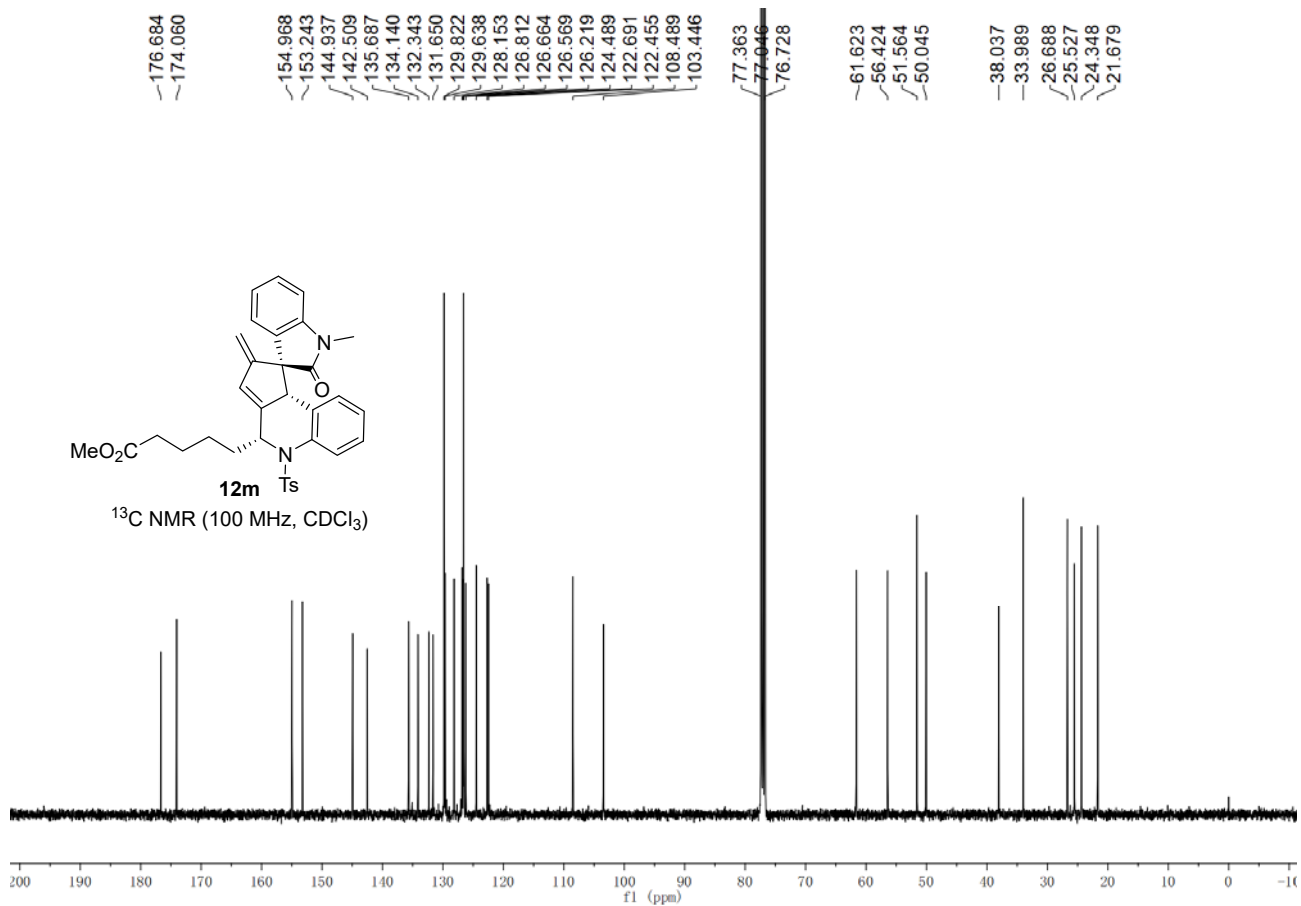

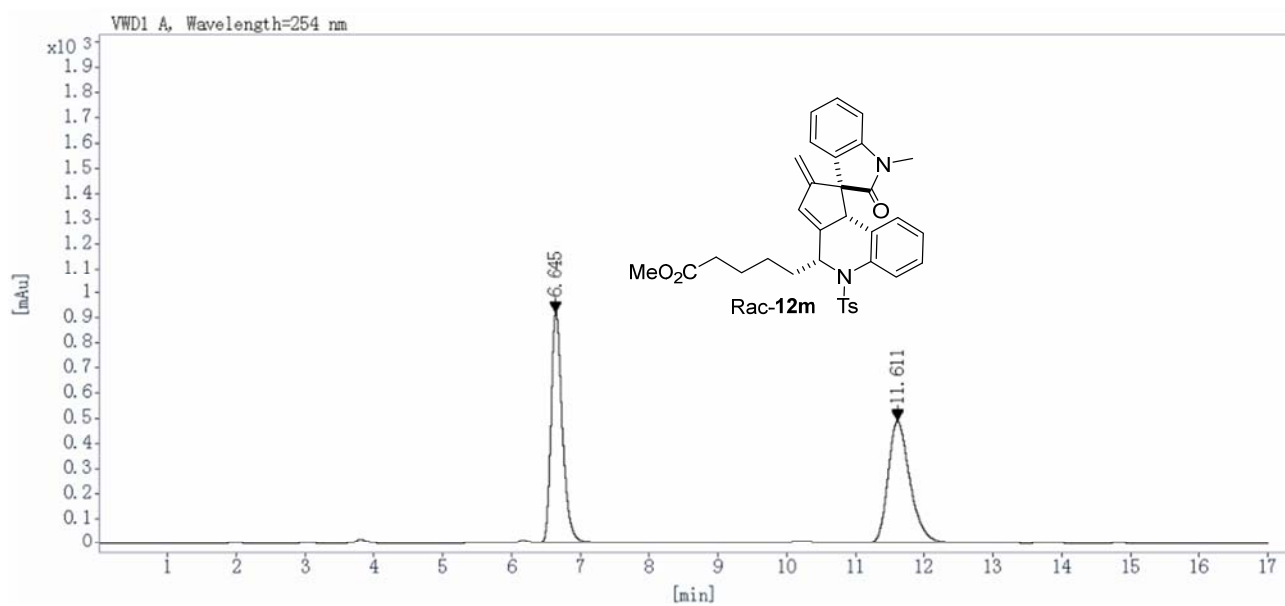

| Ret Time [min] | Peak Type | Width [min] | Height [mAU] | Area [mAU*s] | Area [%] |
|----------------|-----------|-------------|--------------|--------------|----------|
| 6.645          | BVR       | 0.17        | 922.2198     | 10522.9707   | 49.3114  |
| 11.611         | BBA       | 0.34        | 489.4550     | 10816.8643   | 50.6886  |
| Totals:        |           |             |              | 21339.8350   | 100.0000 |

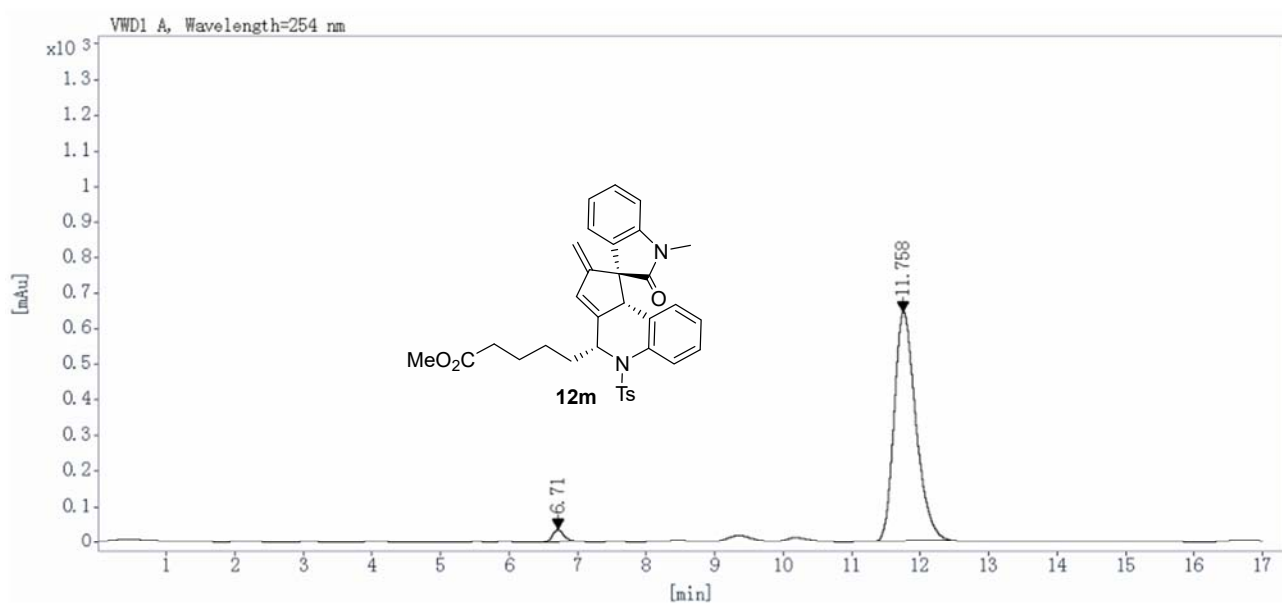

| Ret Time [min] | Peak Type | Width [min] | Height [mAU] | Area [mAU*s] | Area [%] |
|----------------|-----------|-------------|--------------|--------------|----------|
| 6.710          | BBA       | 0.17        | 34.9625      | 388.7296     | 2.6562   |
| 11.758         | BBA       | 0.34        | 644.5510     | 14246.2002   | 97.3438  |
| Totals:        |           |             |              | 14634.9298   | 100.0000 |

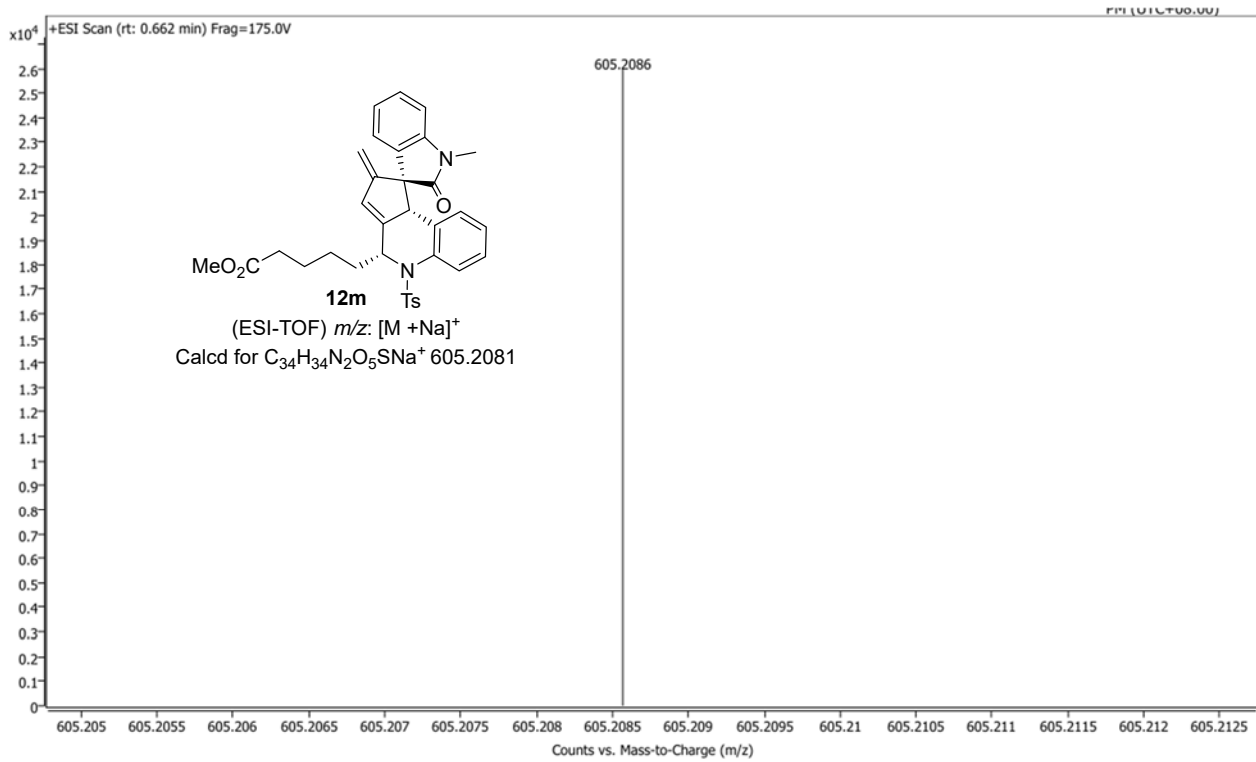

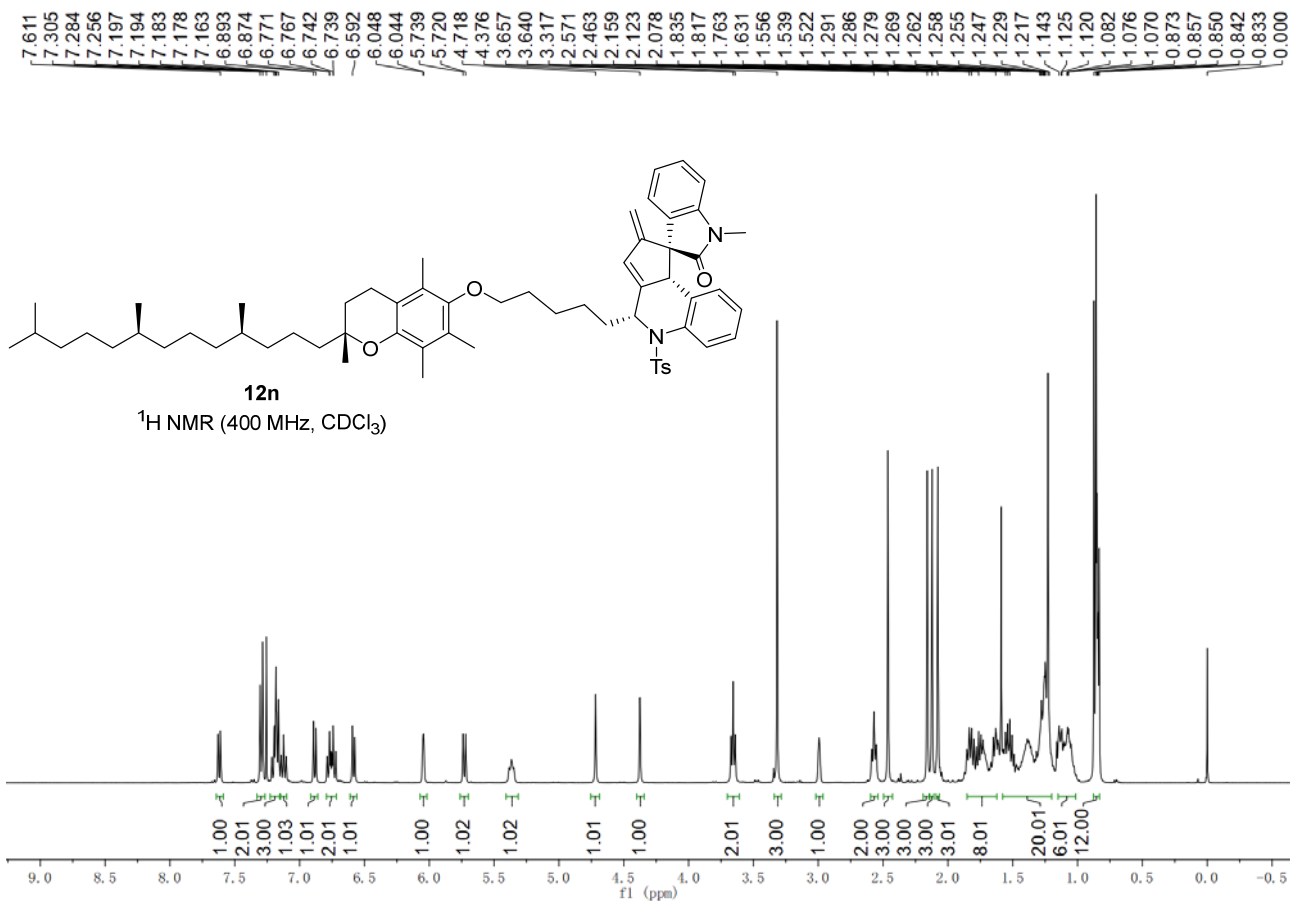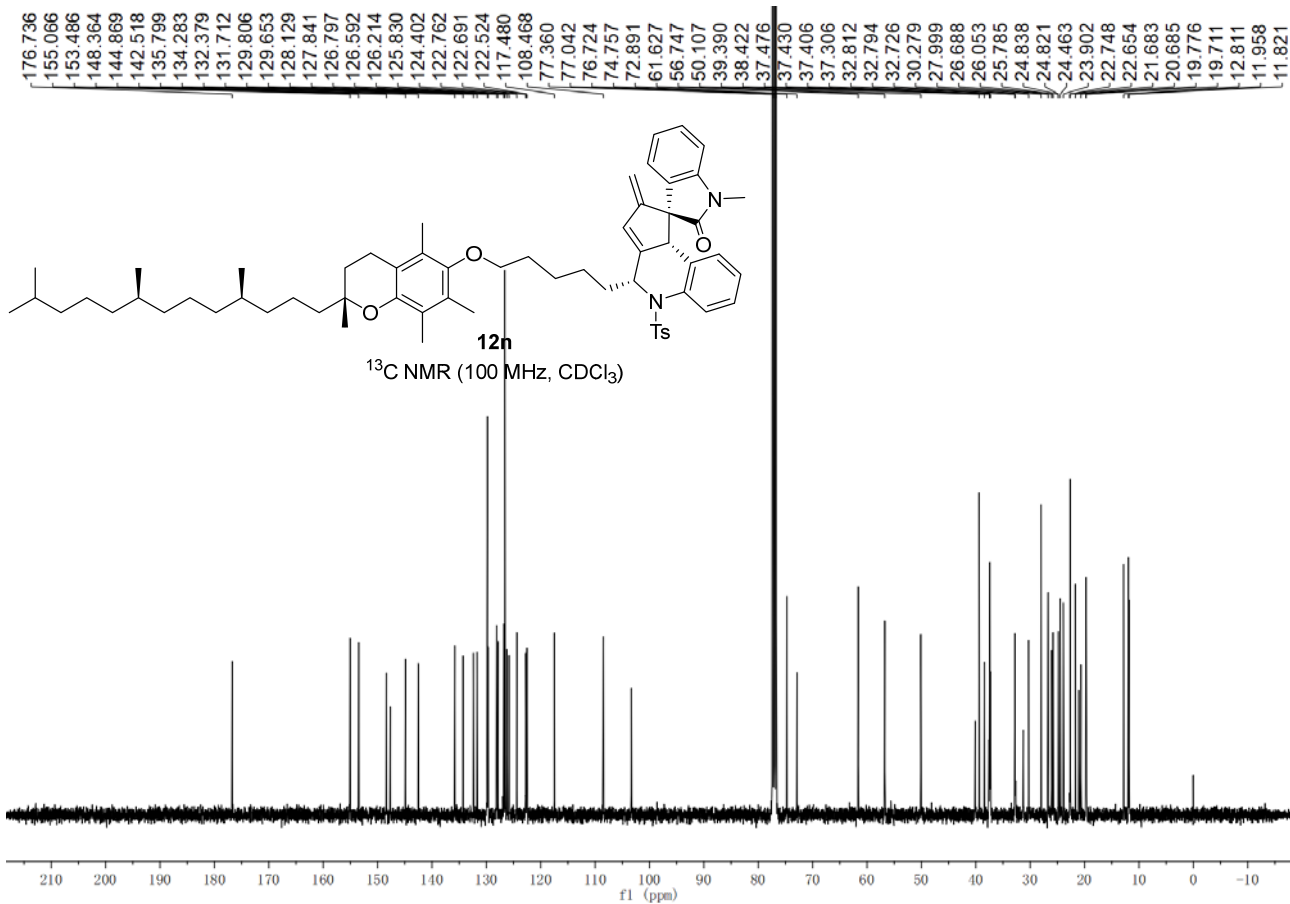

40.153  
40.116  
39.390  
38.422  
37.604  
37.514  
37.476  
37.430  
37.406  
37.363  
37.306

32.812  
32.794  
32.726  
32.703  
31.328  
31.280  
30.279

-27.999  
26.688  
26.053  
25.785  
24.838  
24.821  
24.463  
23.902  
22.748  
22.654  
21.683  
21.068  
20.685  
19.776  
19.711  
19.684  
19.646  
19.621

-12.811  
-11.958  
-11.821

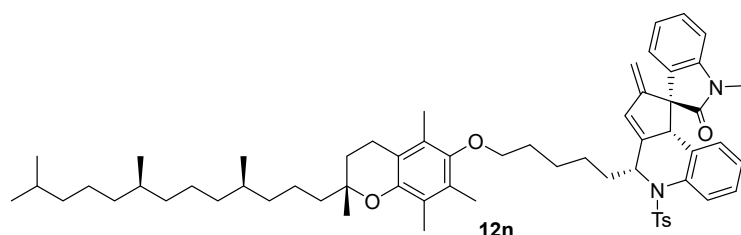

<sup>13</sup>C NMR (100 MHz, CDCl<sub>3</sub>)

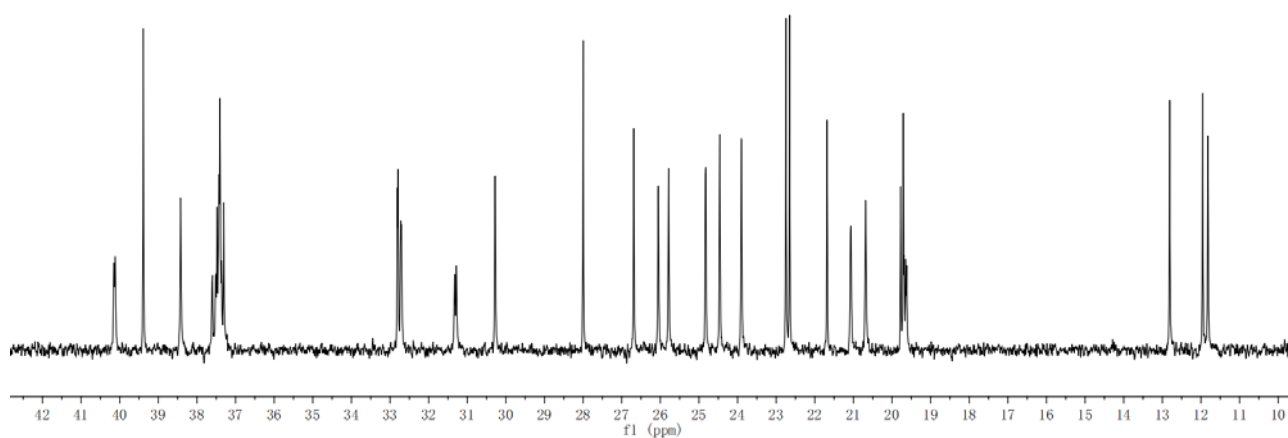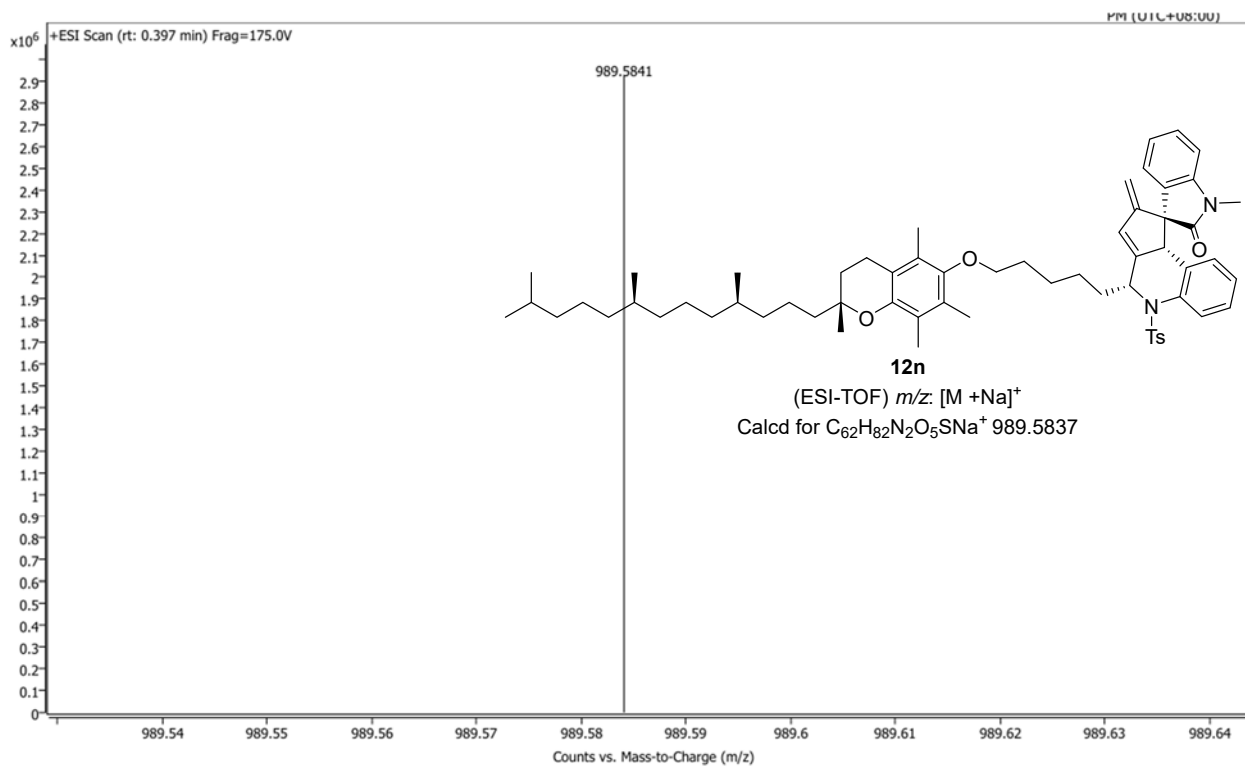

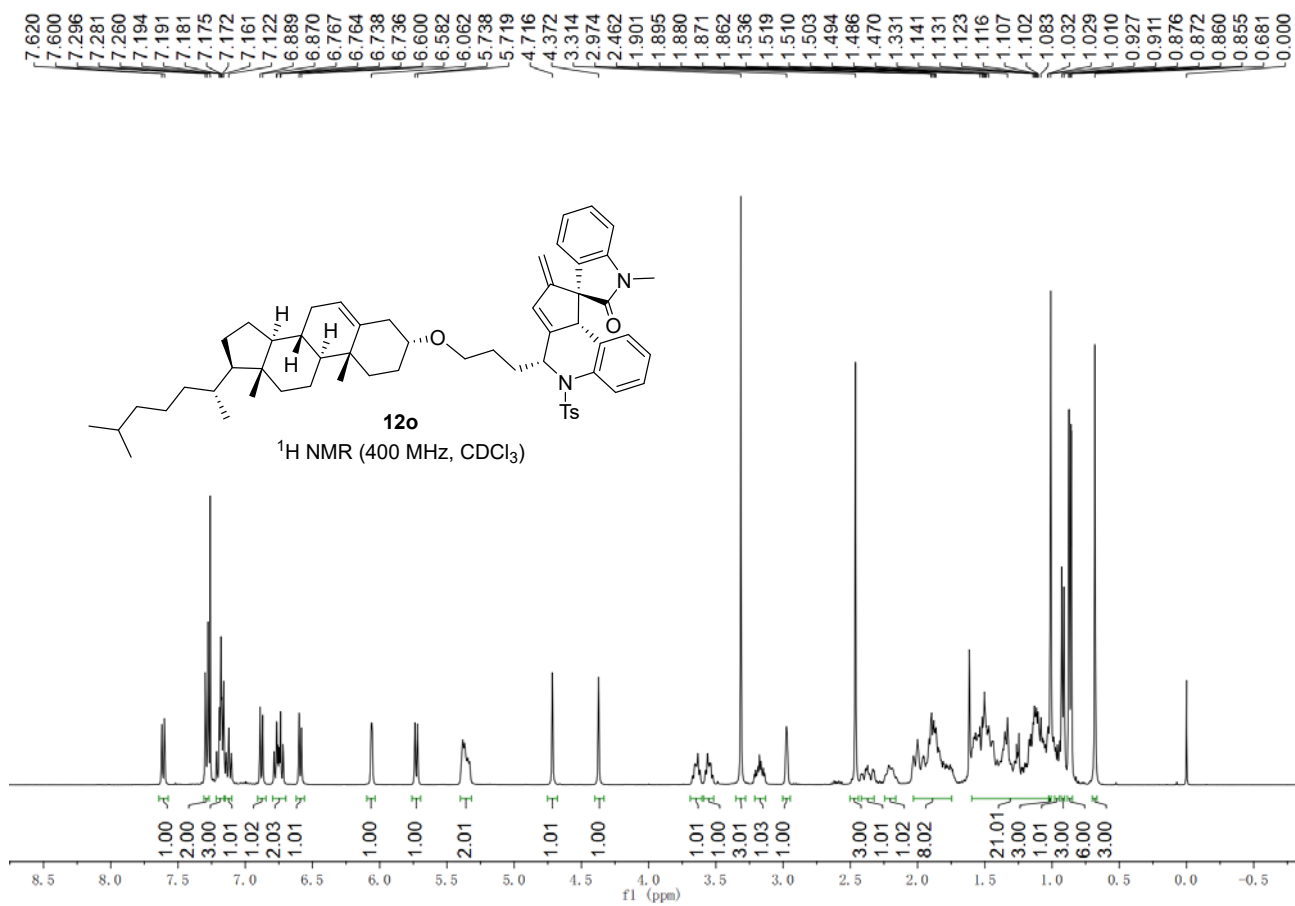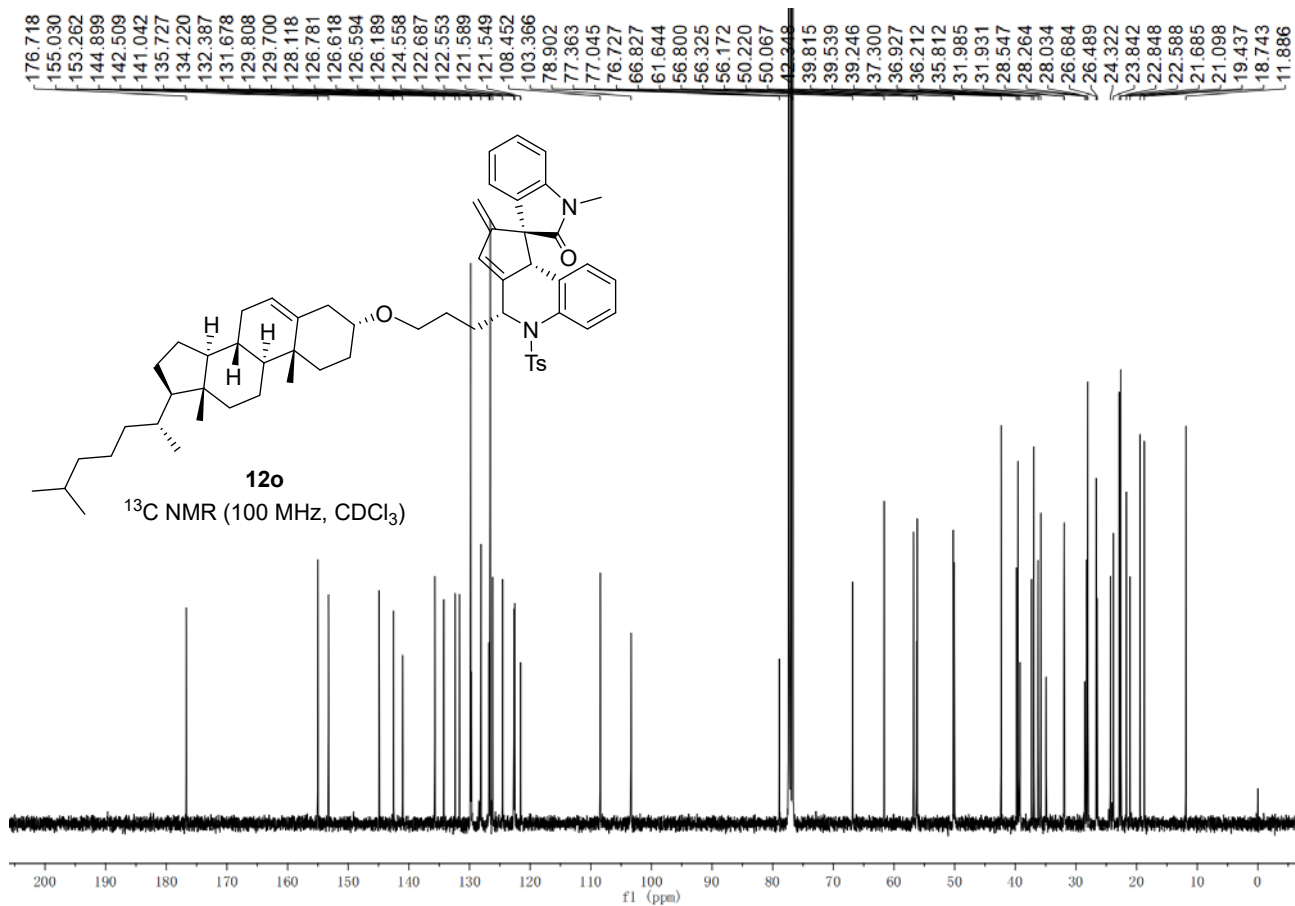



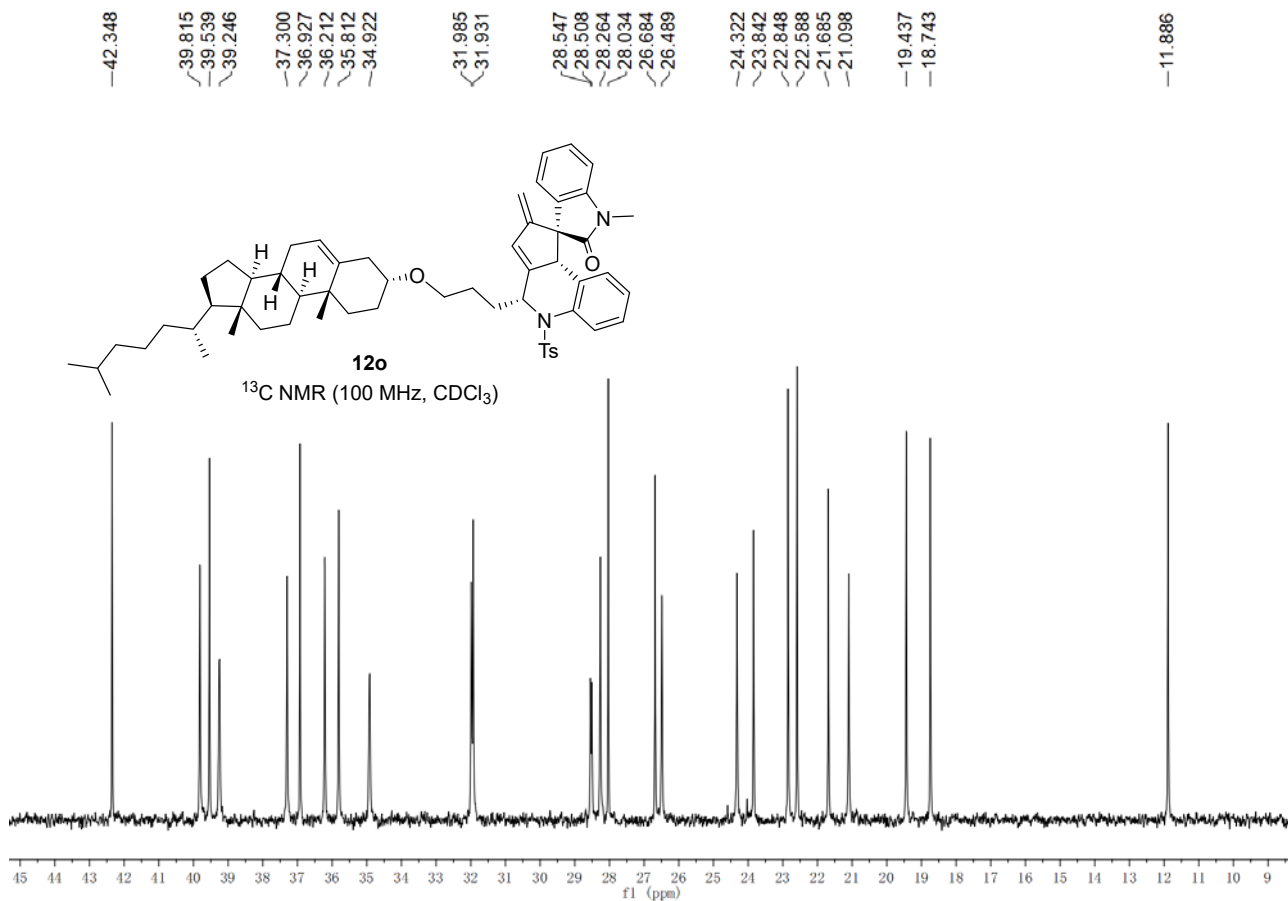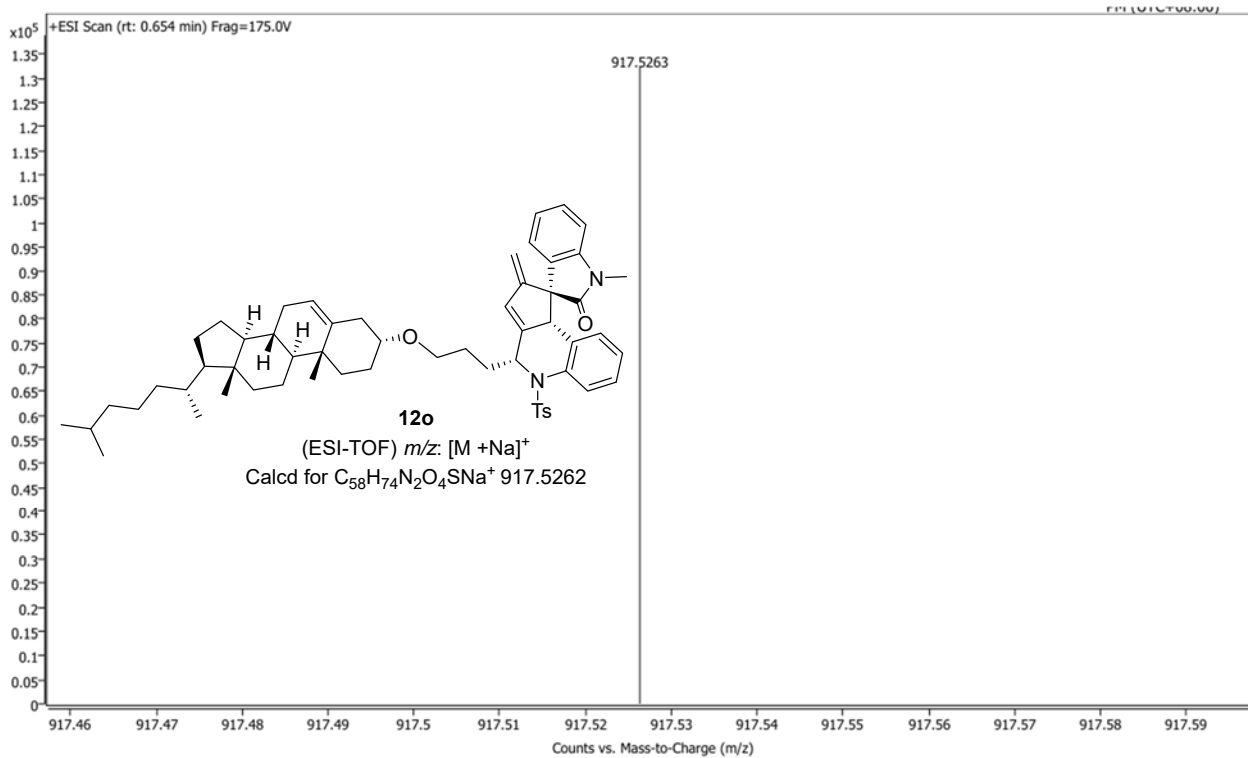

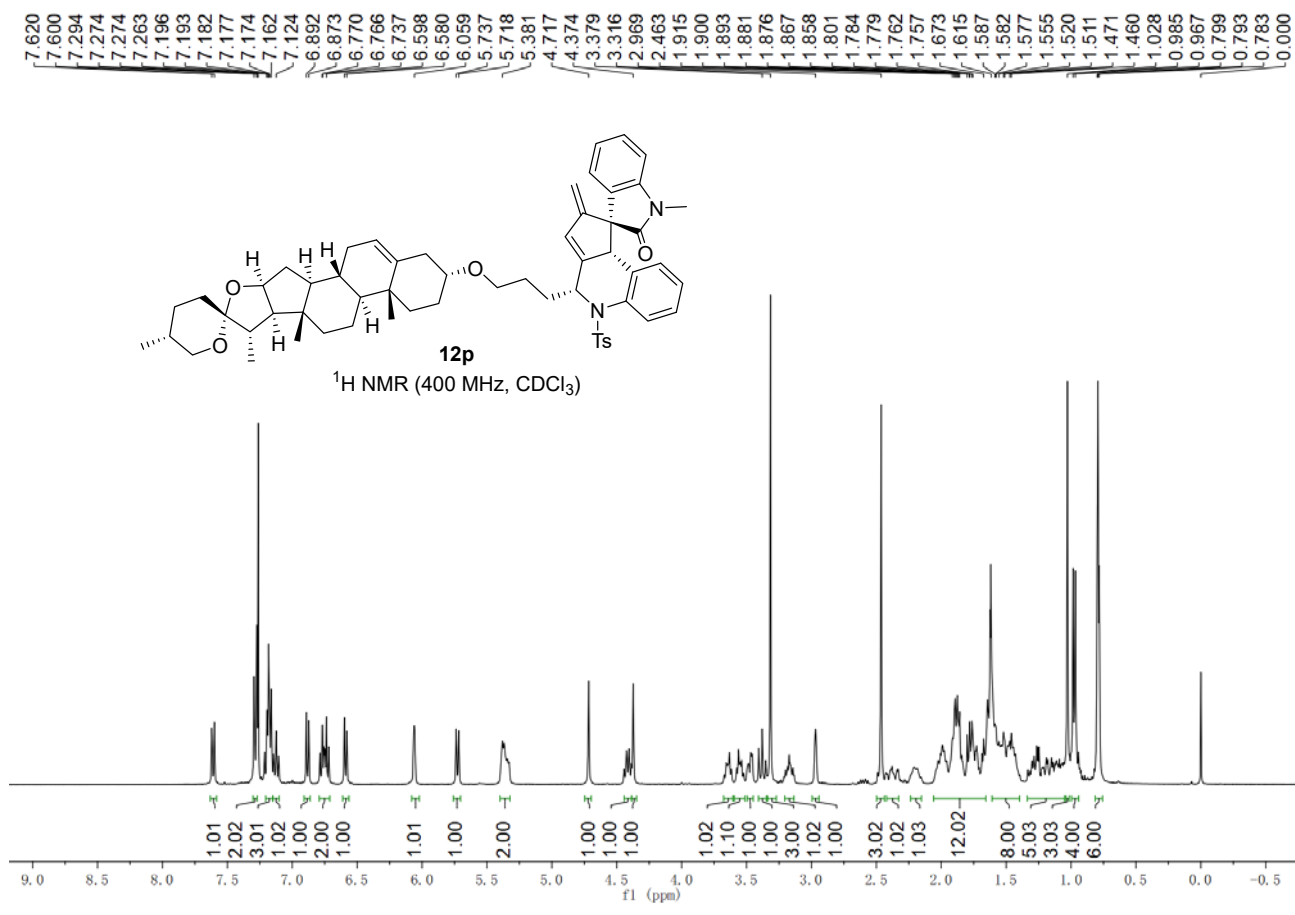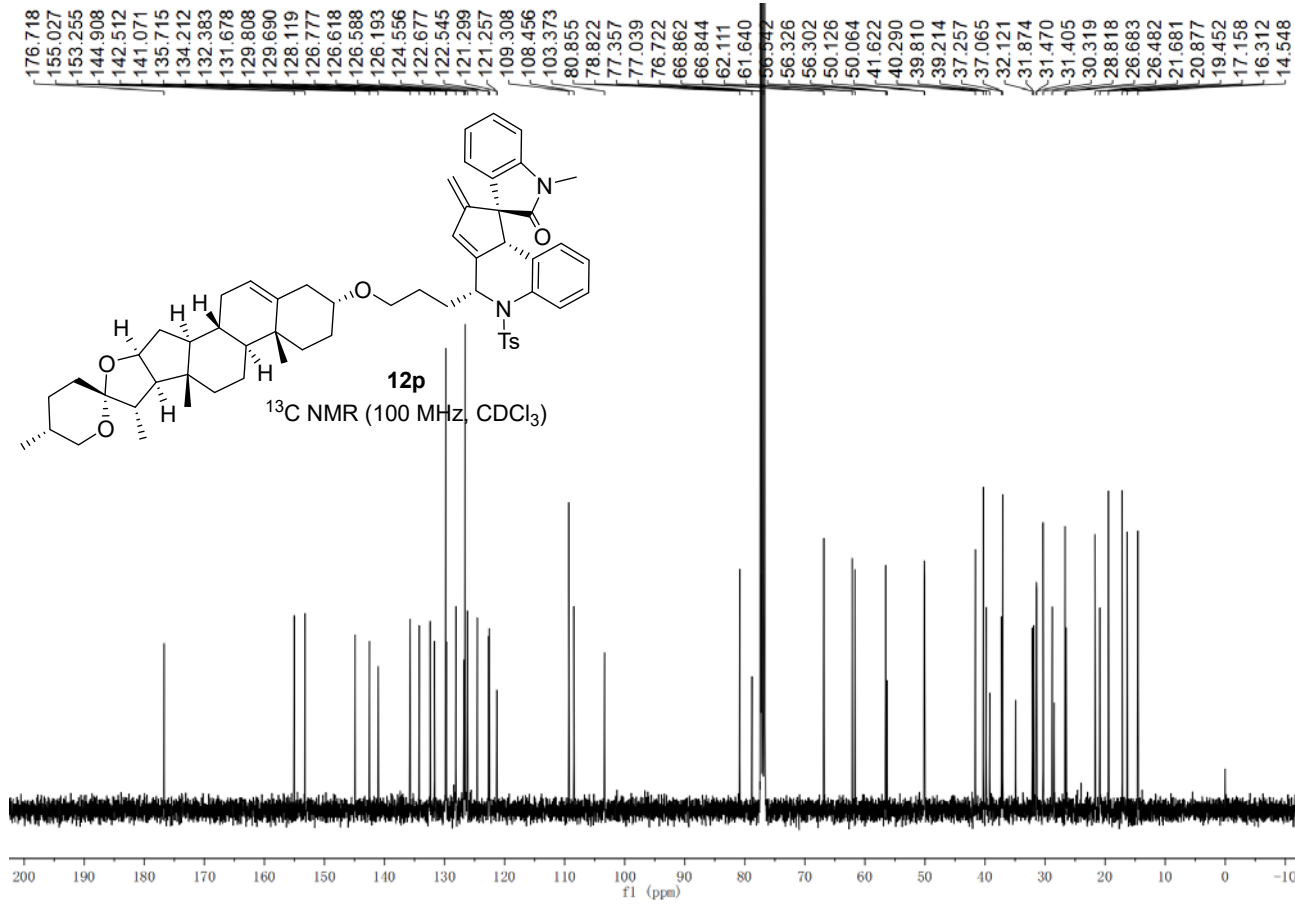

66.862  
66.844  
62.111  
61.640  
56.542  
56.326  
56.302  
50.126  
50.064  
41.622  
40.290  
39.810  
39.214  
37.257  
37.065  
34.920  
32.121  
31.874  
31.470  
31.405  
30.319  
28.818  
28.519  
28.482  
26.683  
26.482  
21.681  
20.877  
19.452  
17.158  
16.312  
14.548

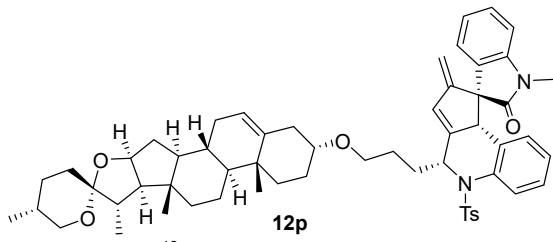

$^{13}\text{C}$  NMR (100 MHz,  $\text{CDCl}_3$ )

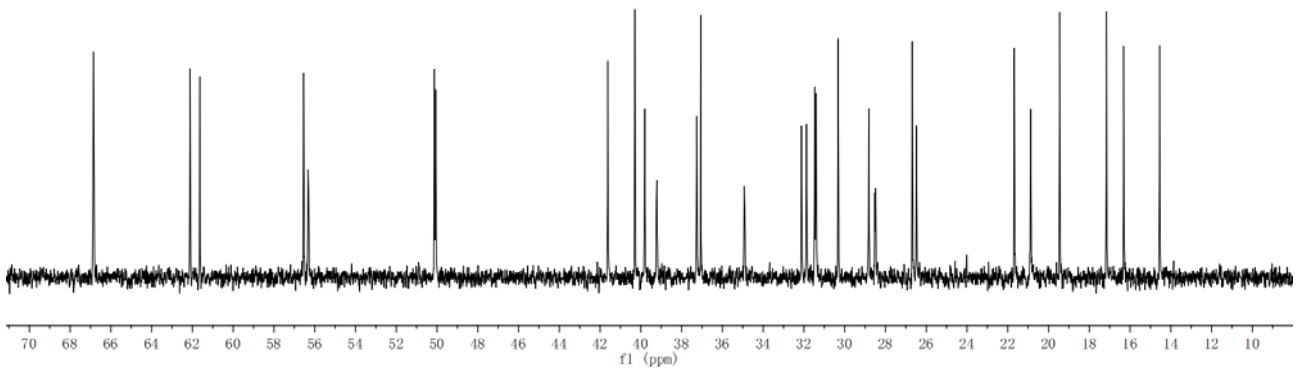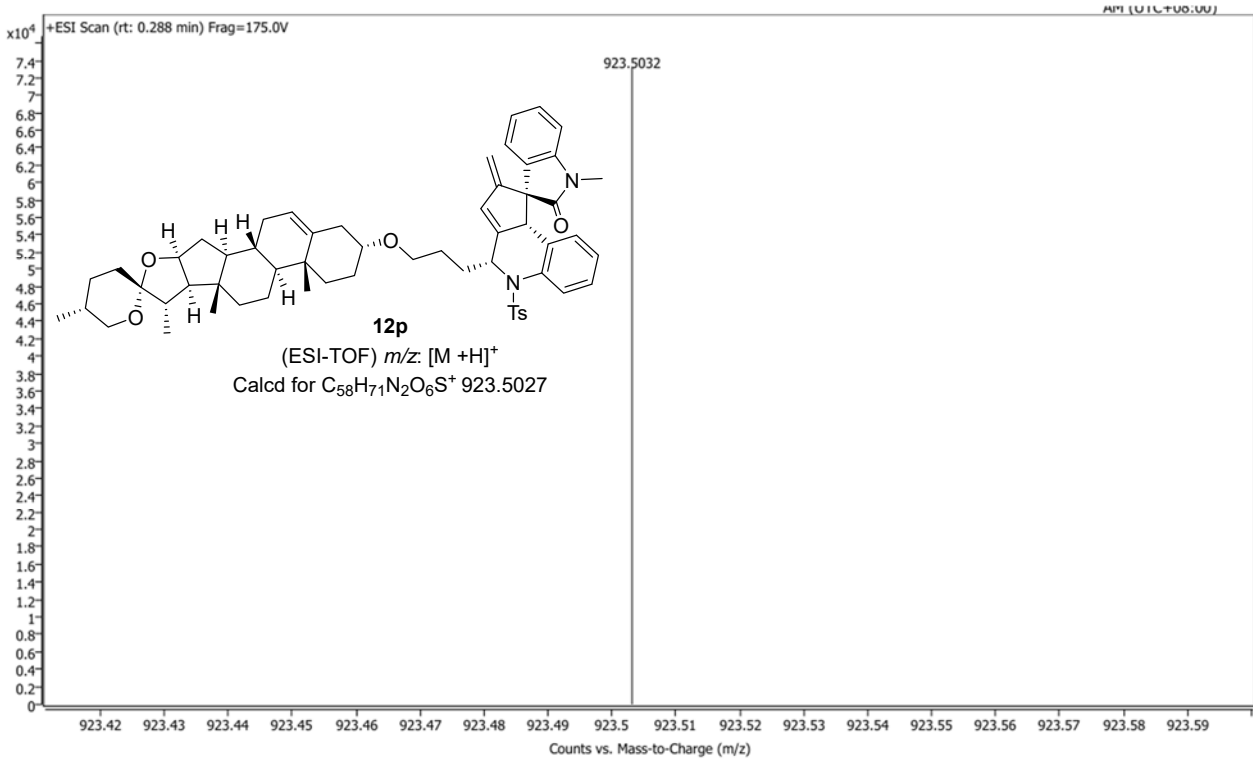

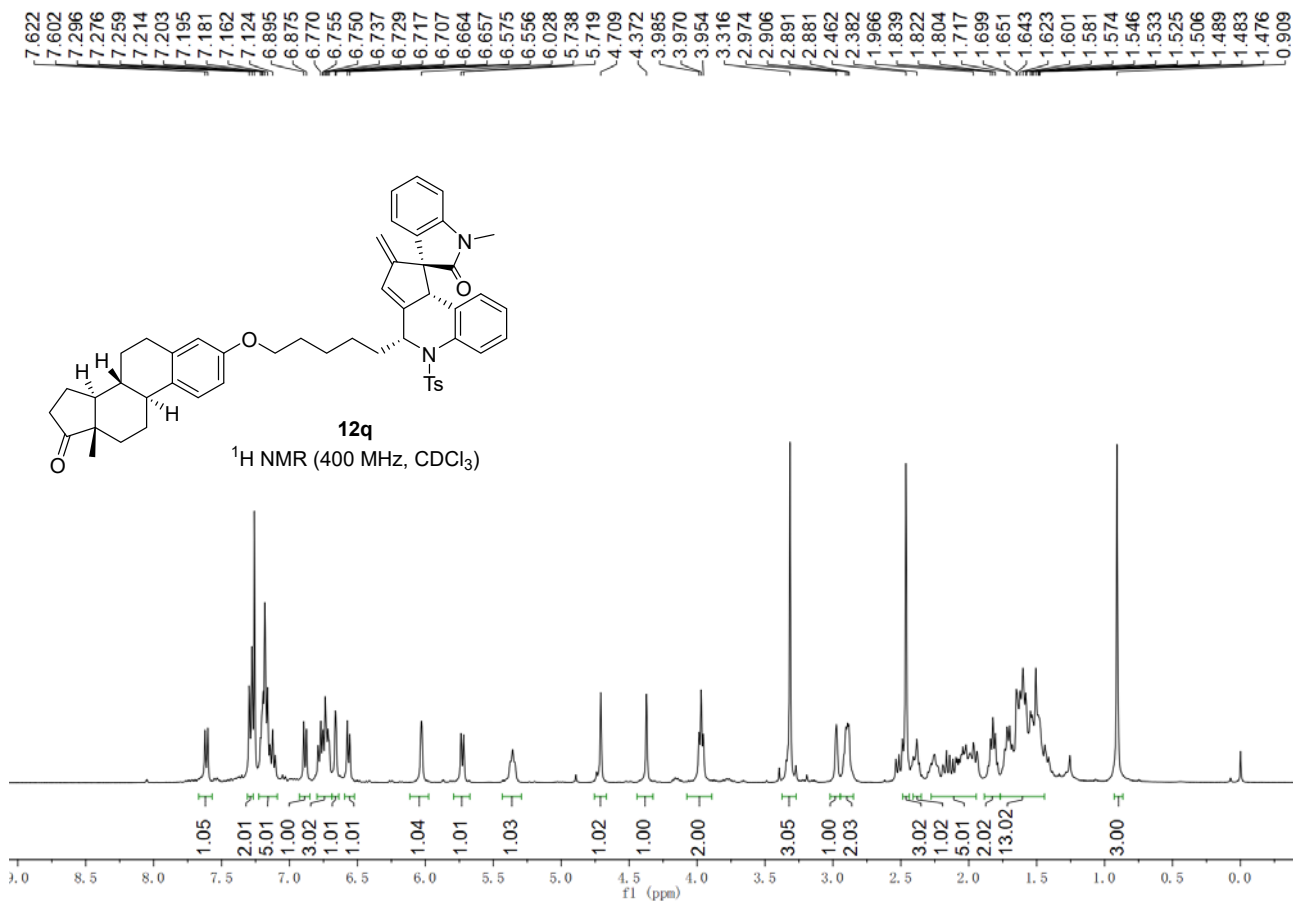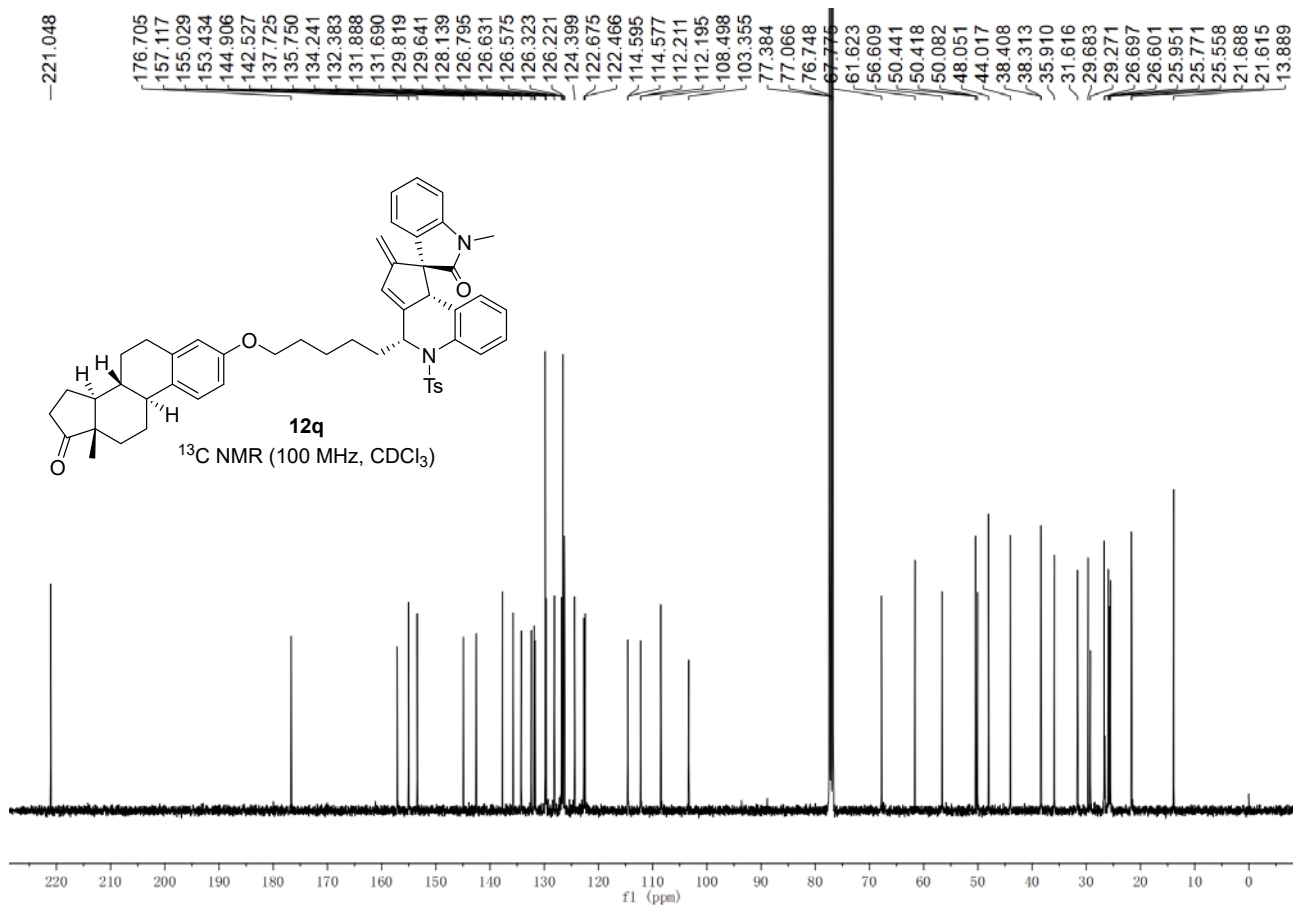

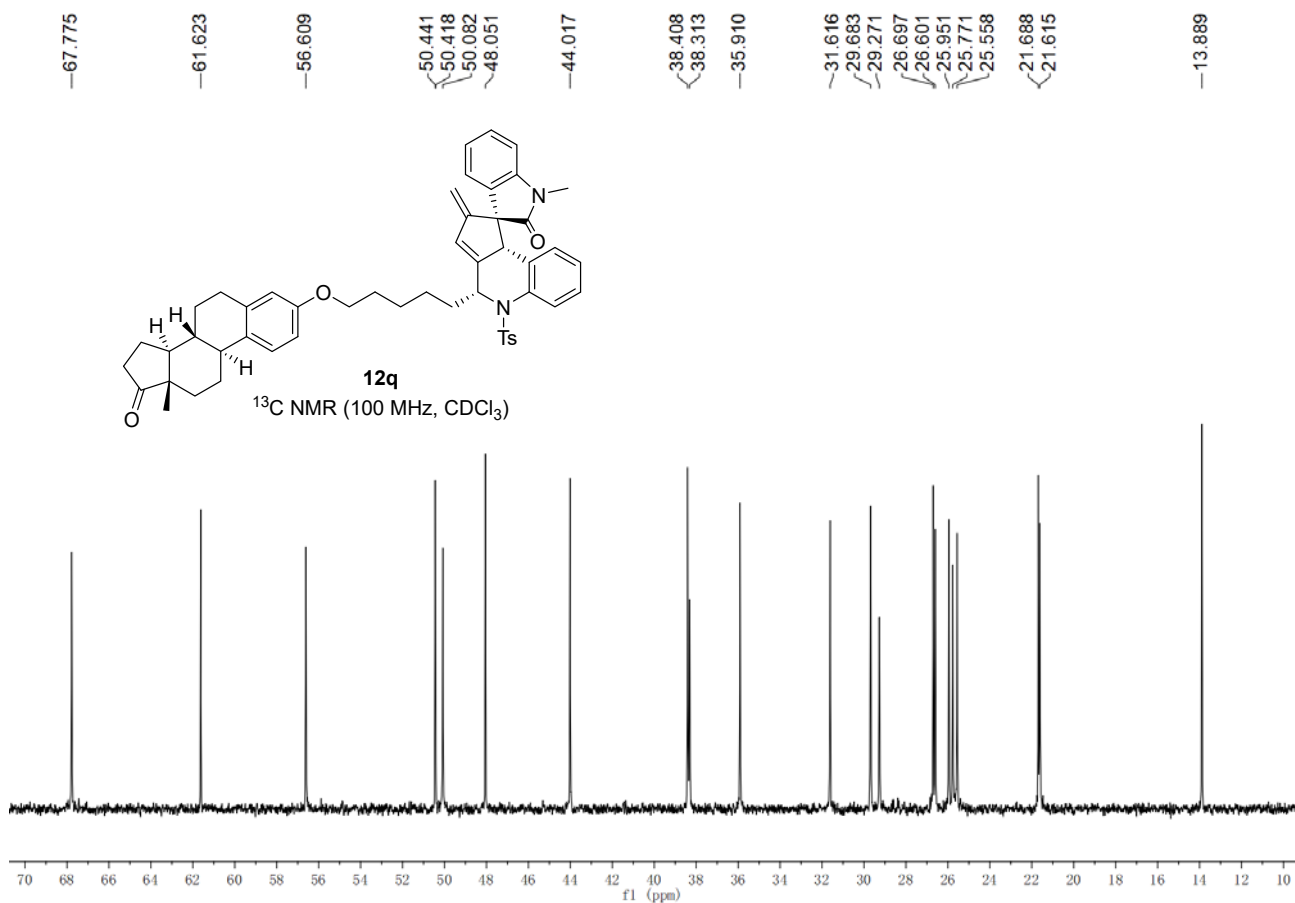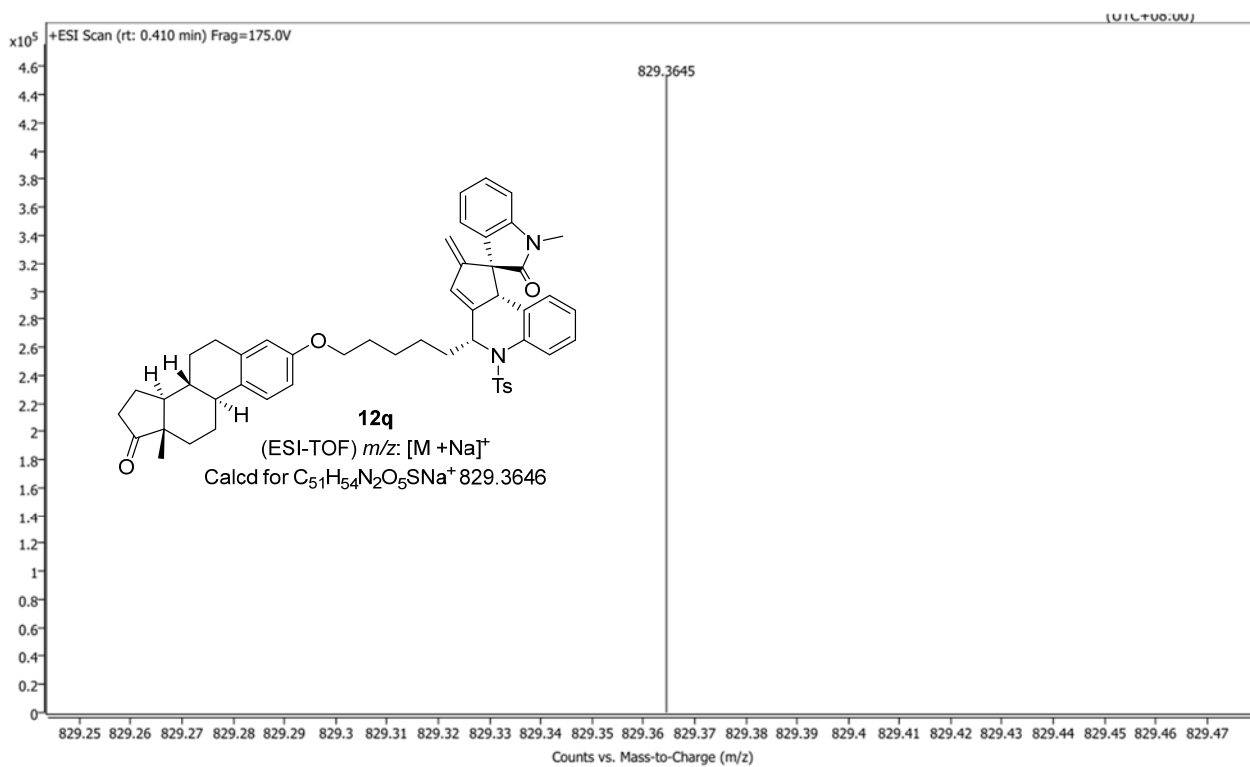

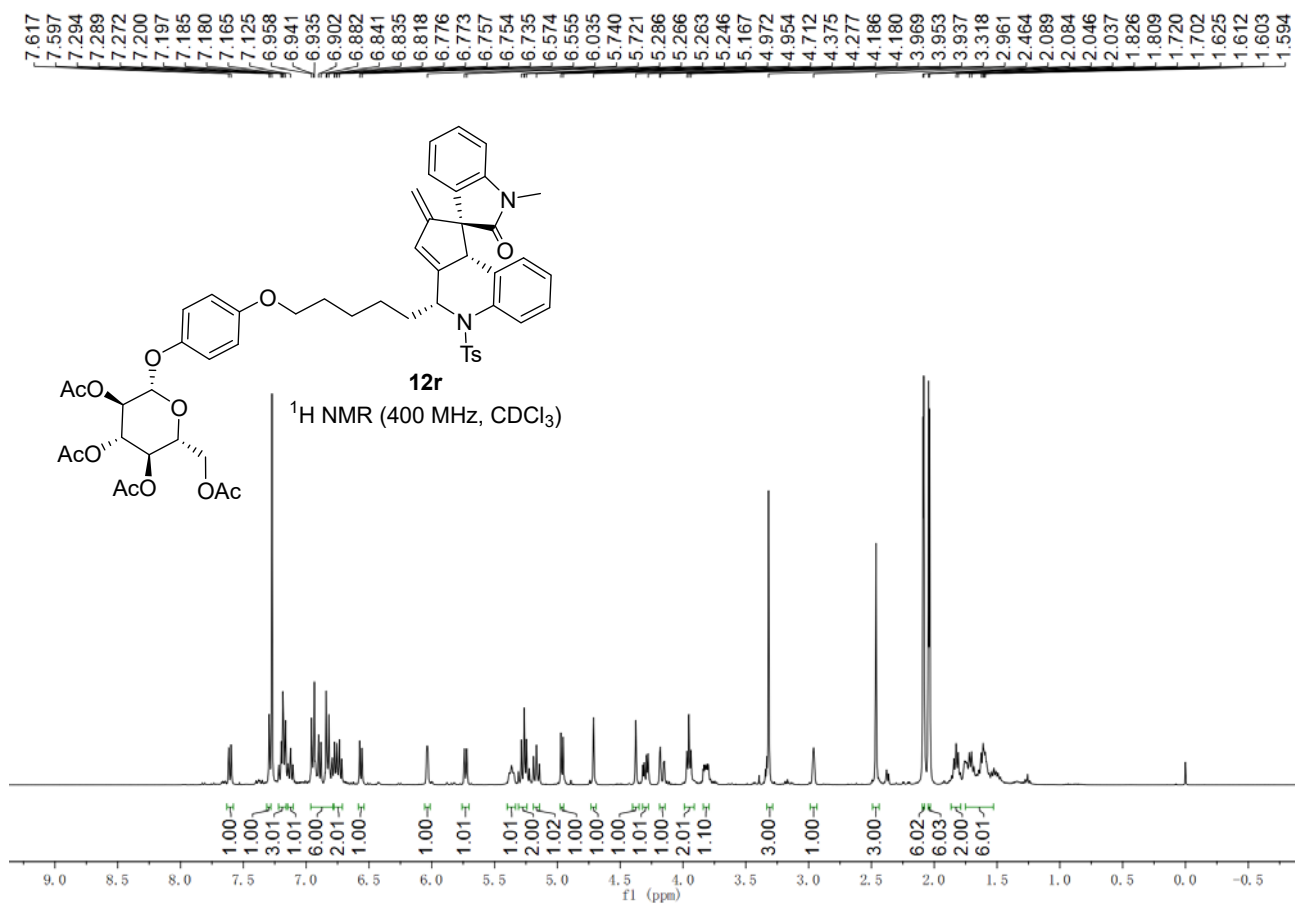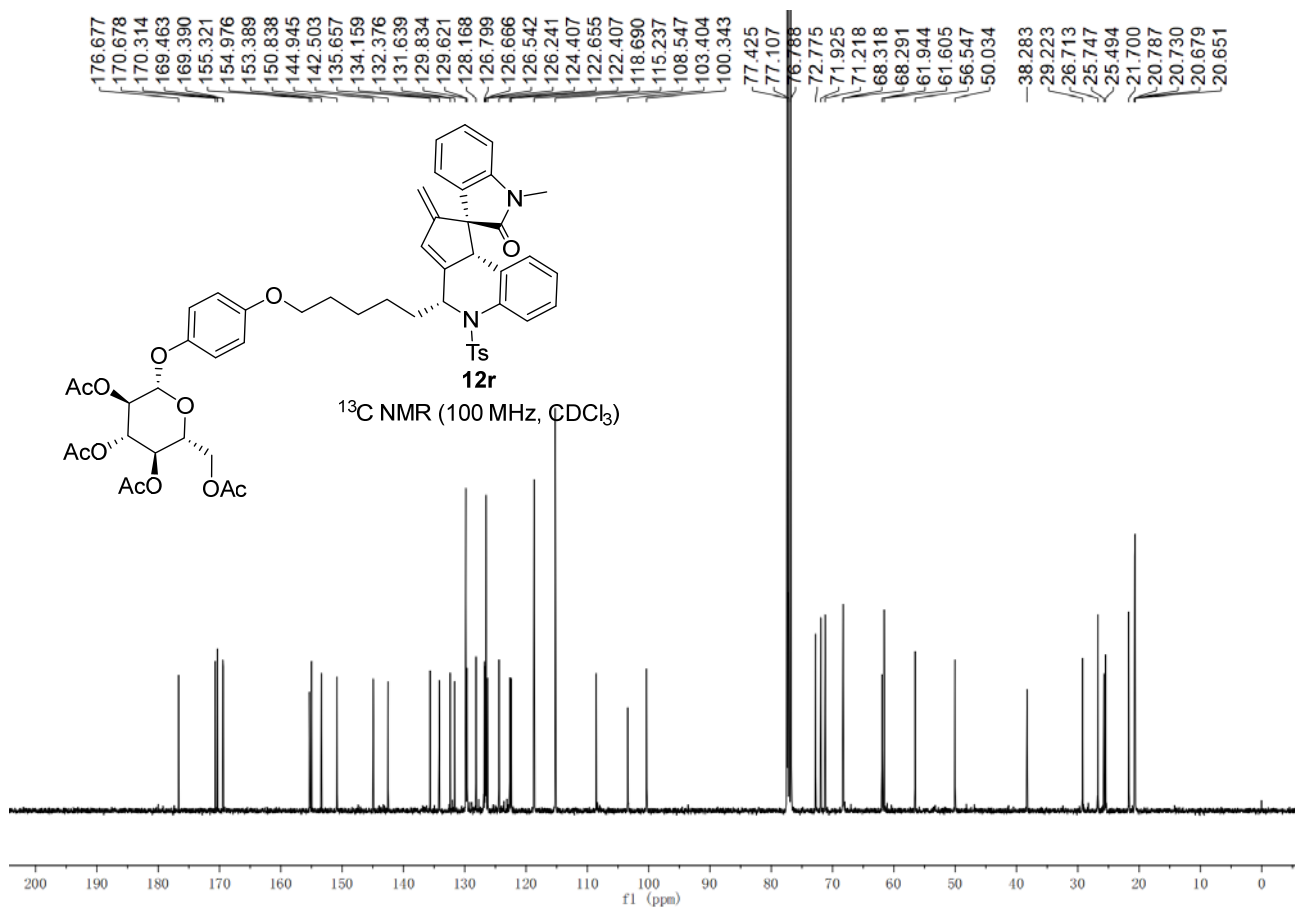

Spectrum from 20240817.wif2 (sample 10) - 6, +TOF MS (800 - 1100) from 0.037 to 0.086 min, noise filtered (noise multiplier = 1.5), Gaussian smoothed (0.5 points), centroided

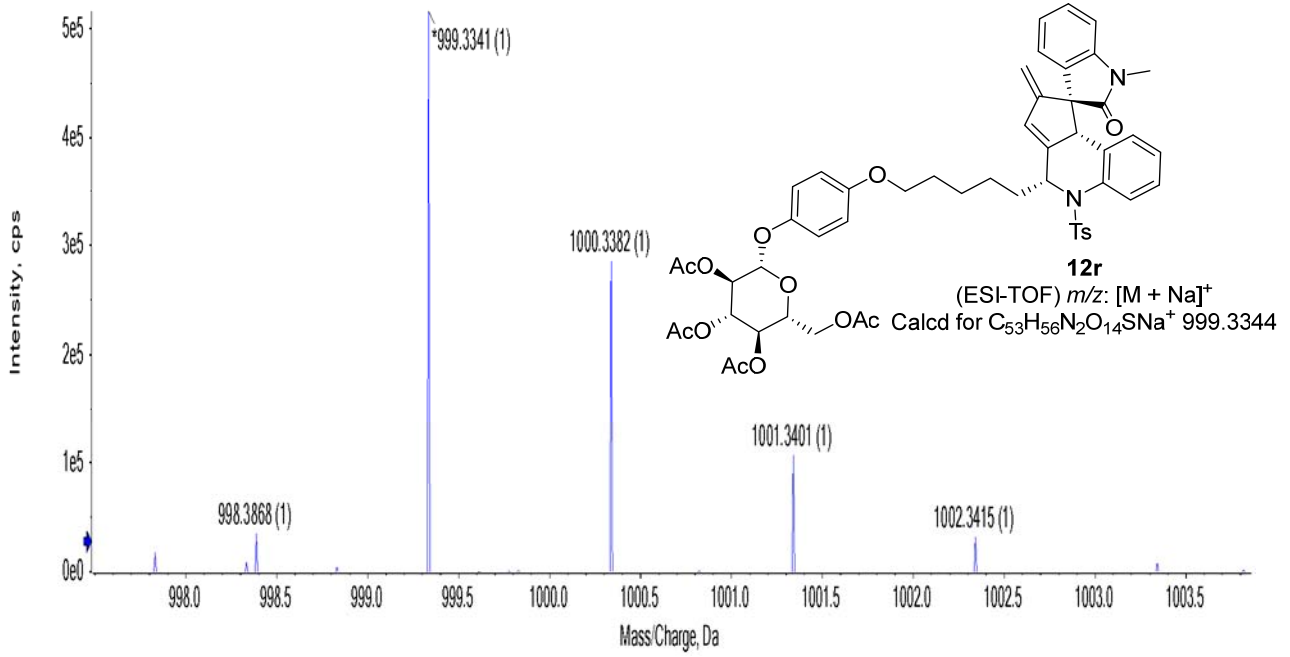

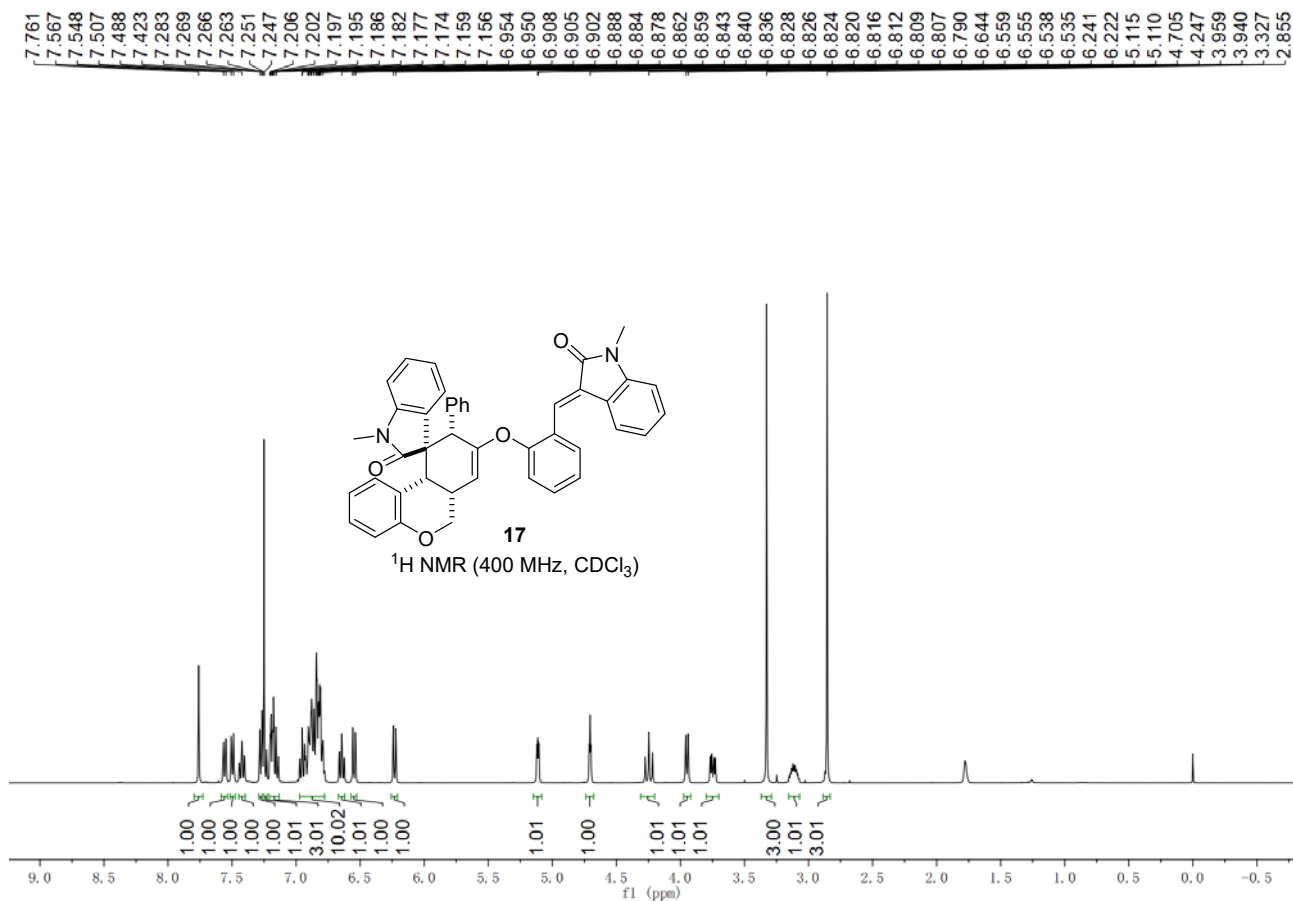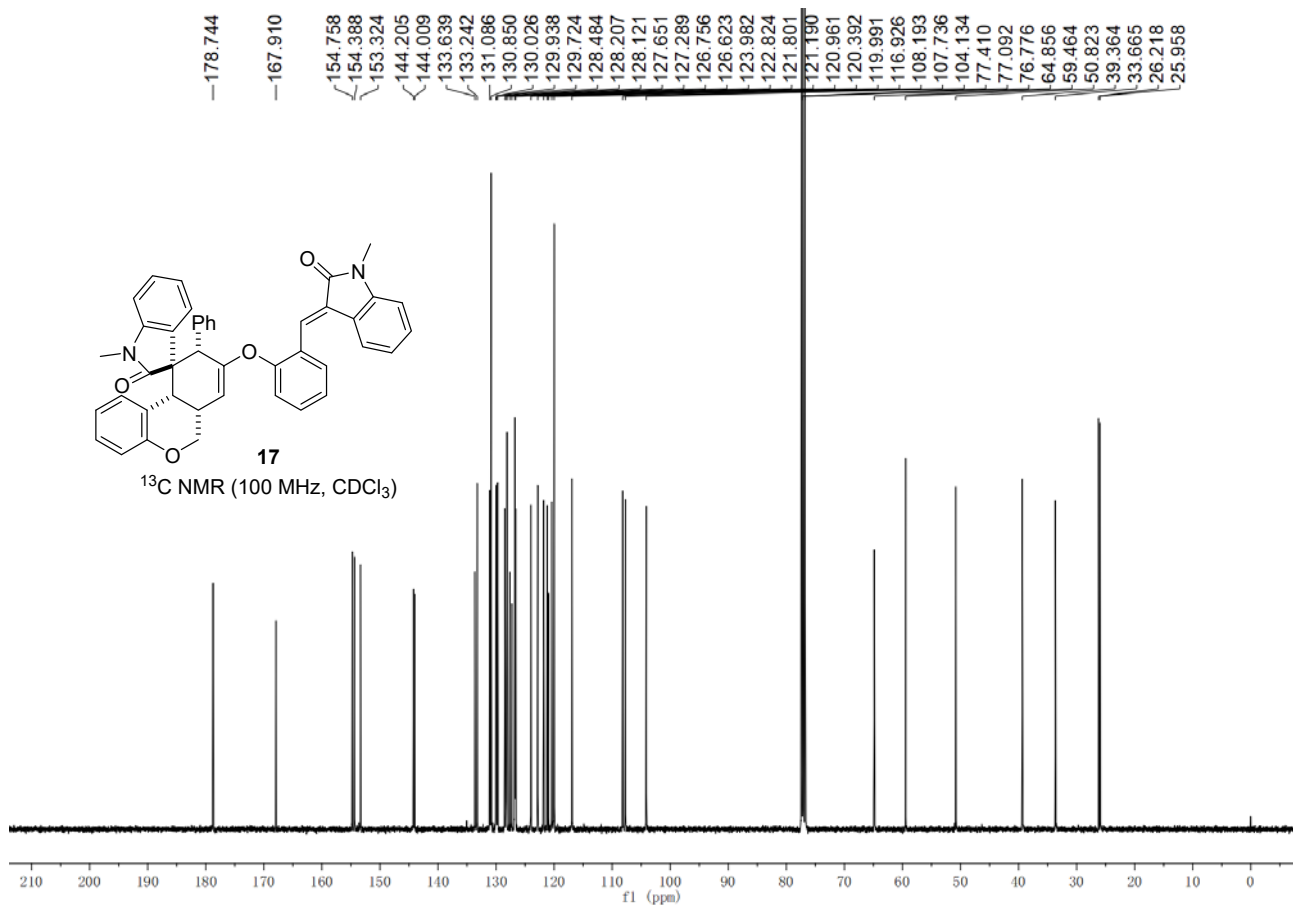



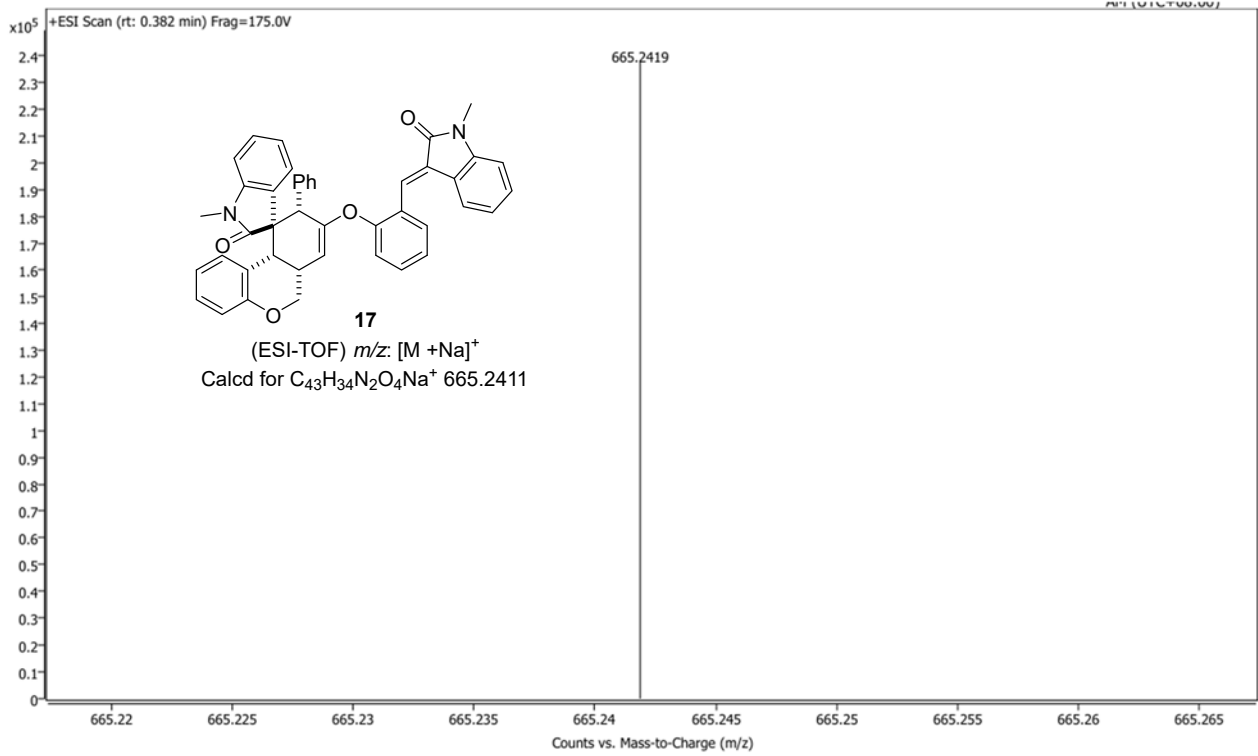

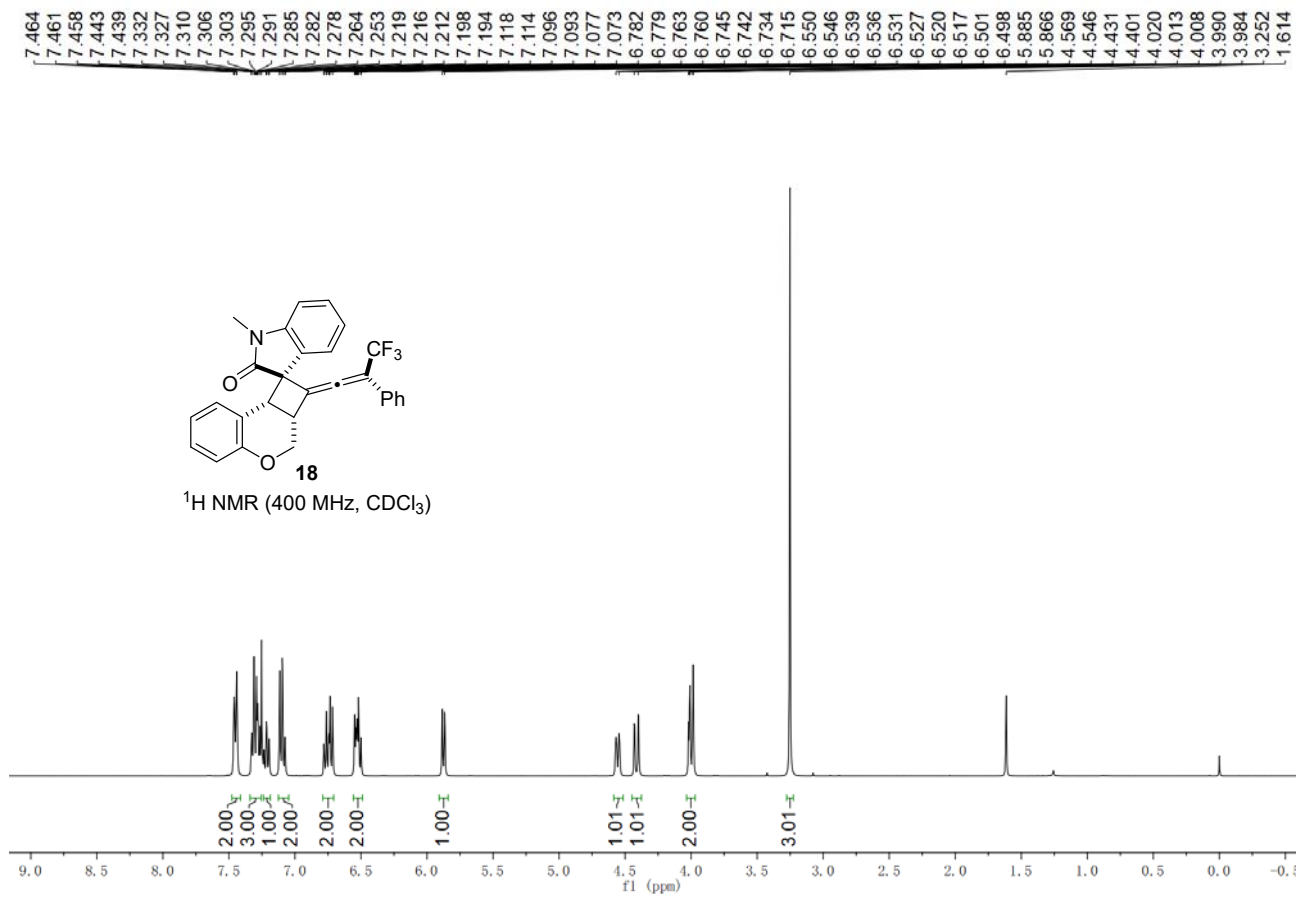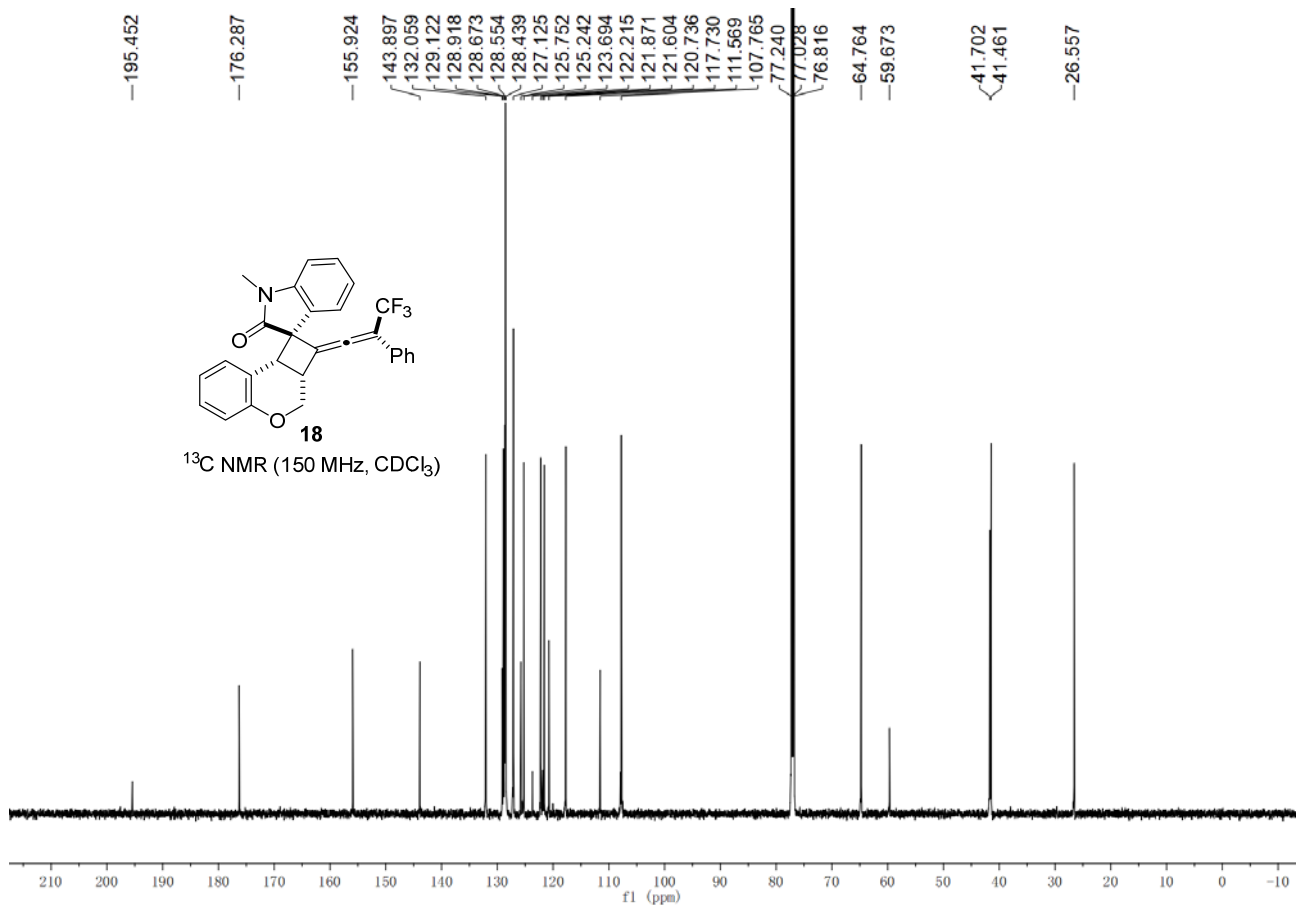

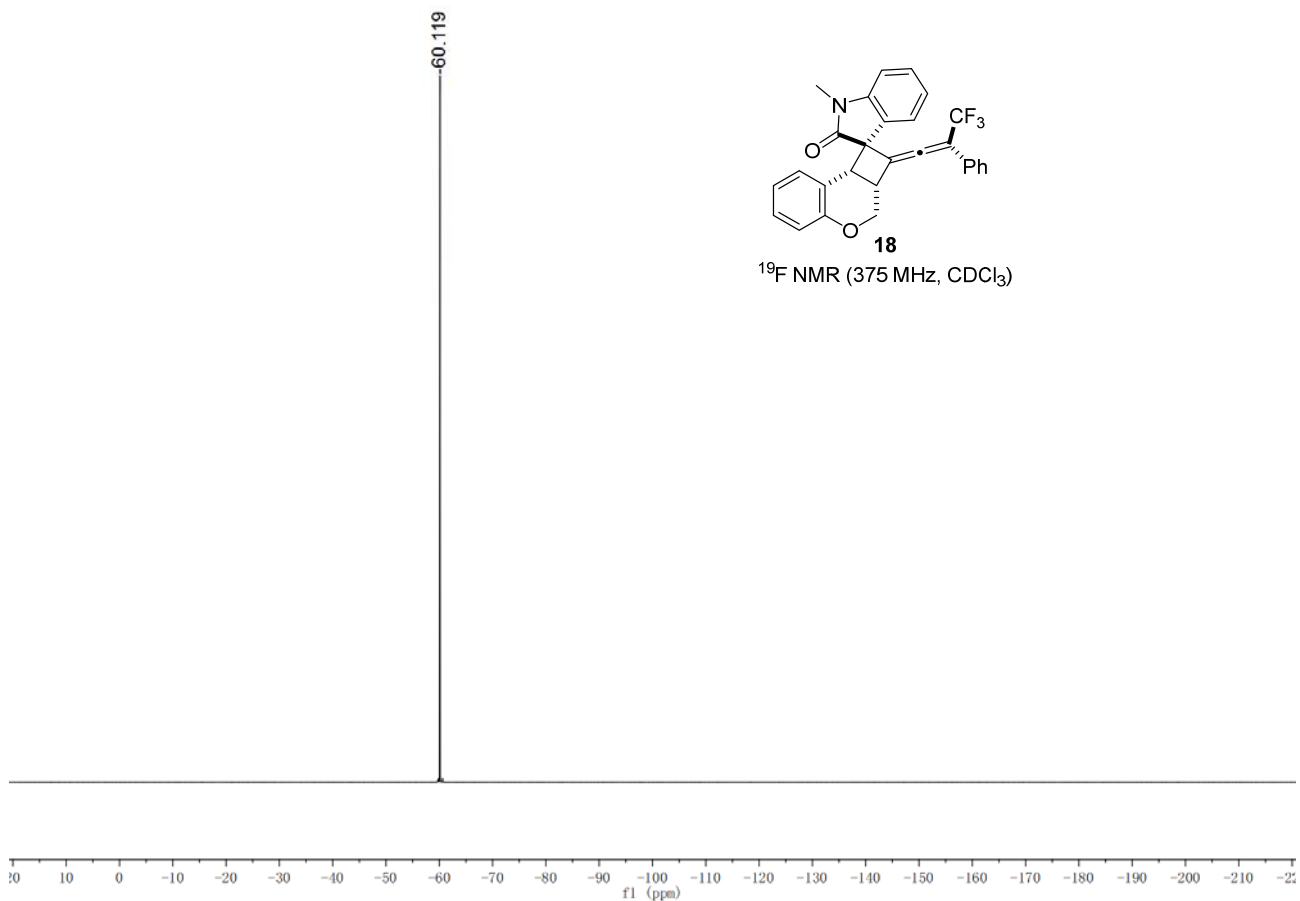

Spectrum from 20240821.wif2 (sample 16) - 9, +TOF MS (200 - 600) from 0.063 to 0.111 min, noise filtered (noise multiplier = 1.5), Gaussian smoothed (0.5 points), centroided

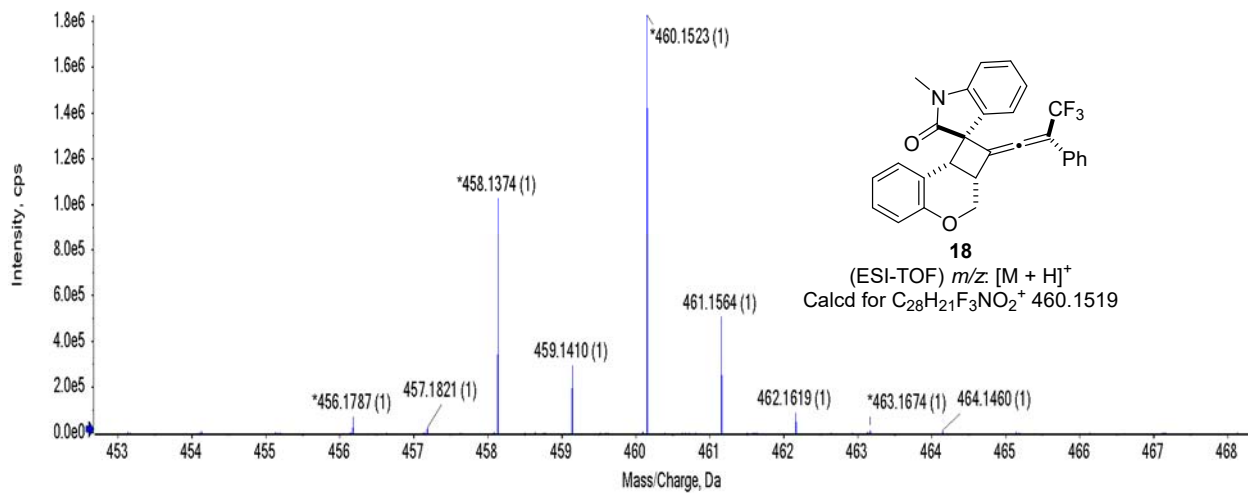

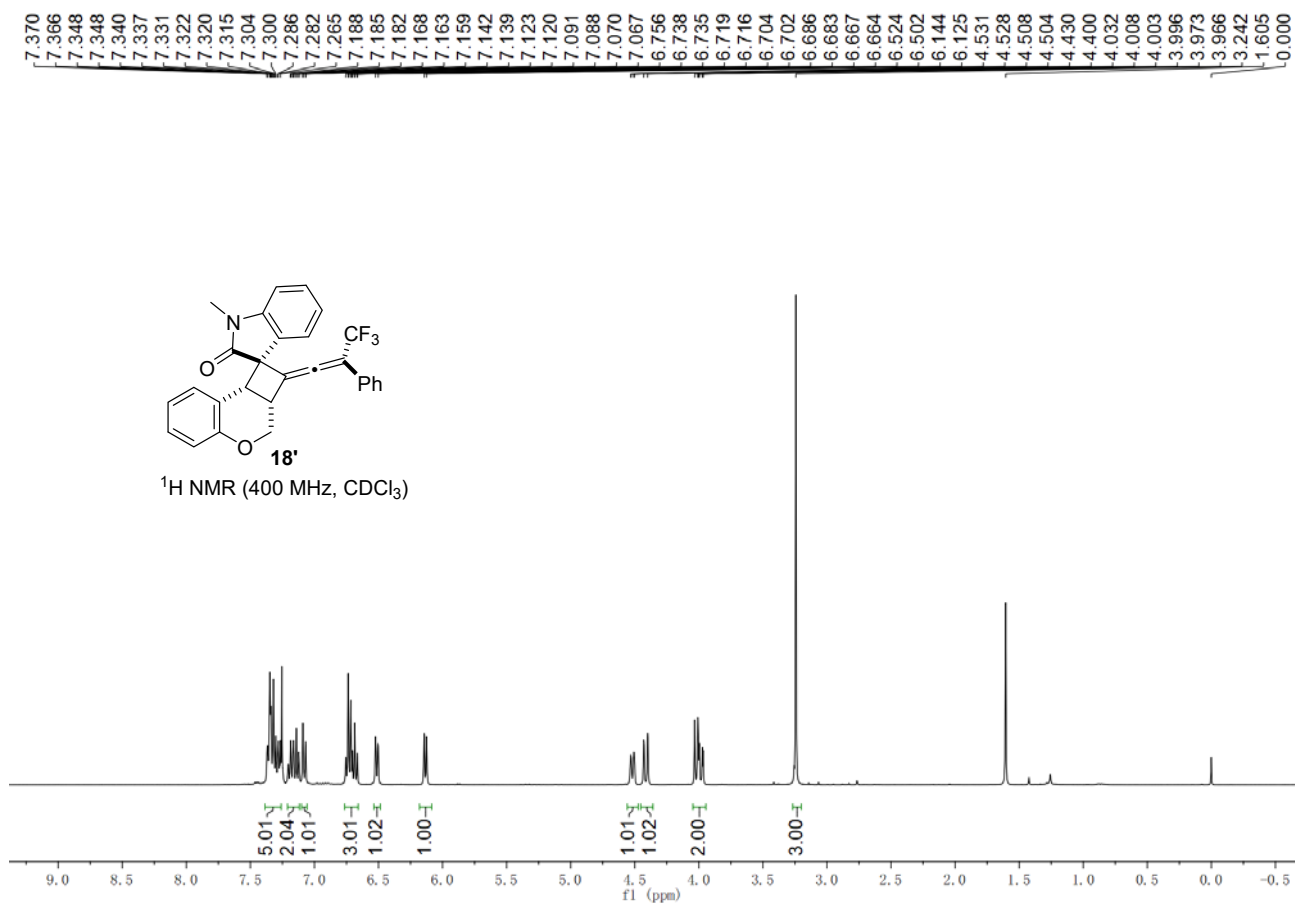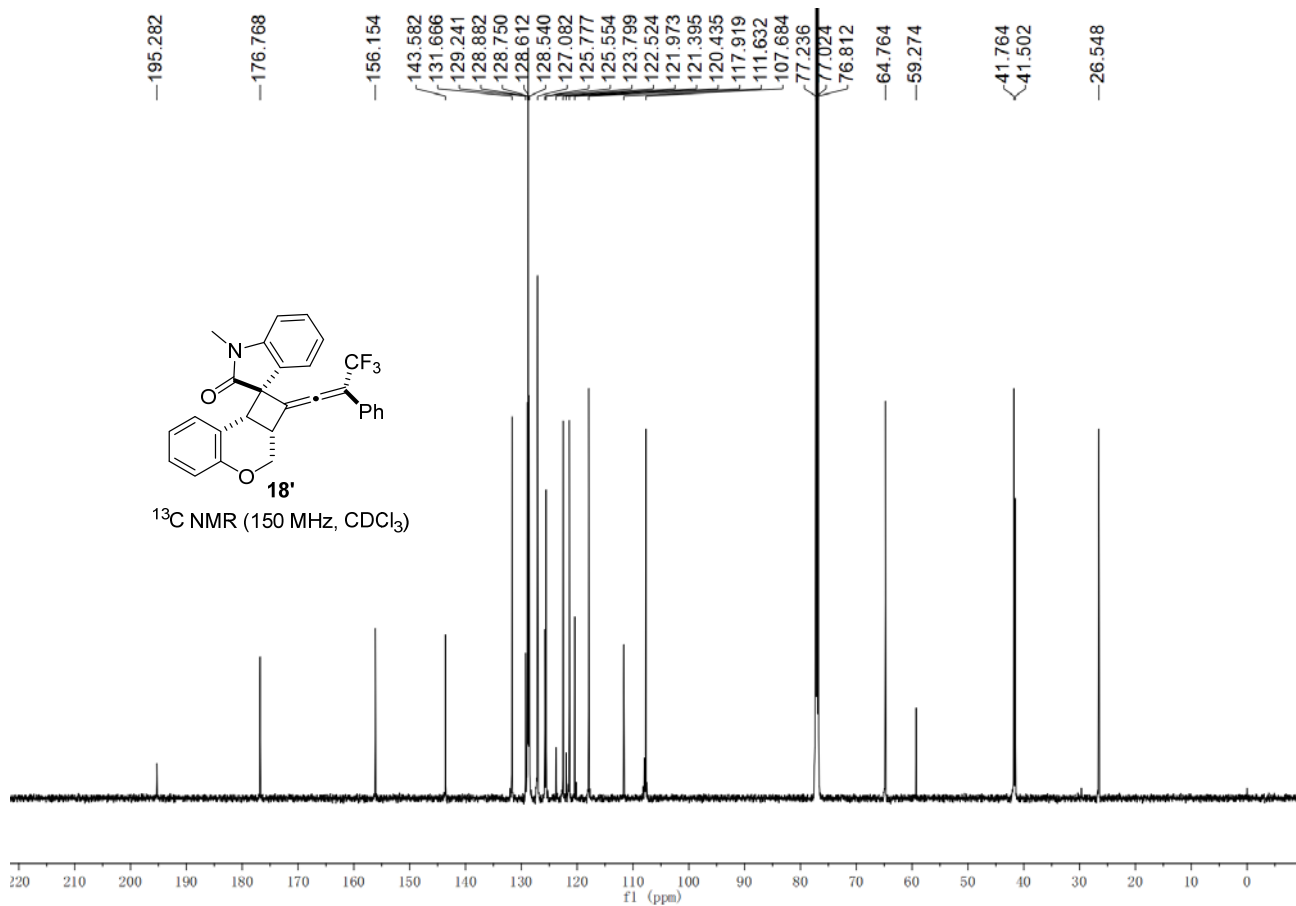

---59.738

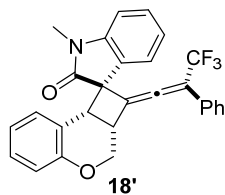

<sup>19</sup>F NMR (375 MHz, CDCl<sub>3</sub>)

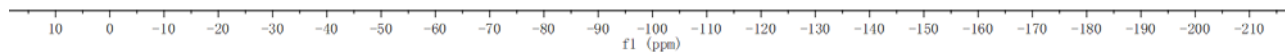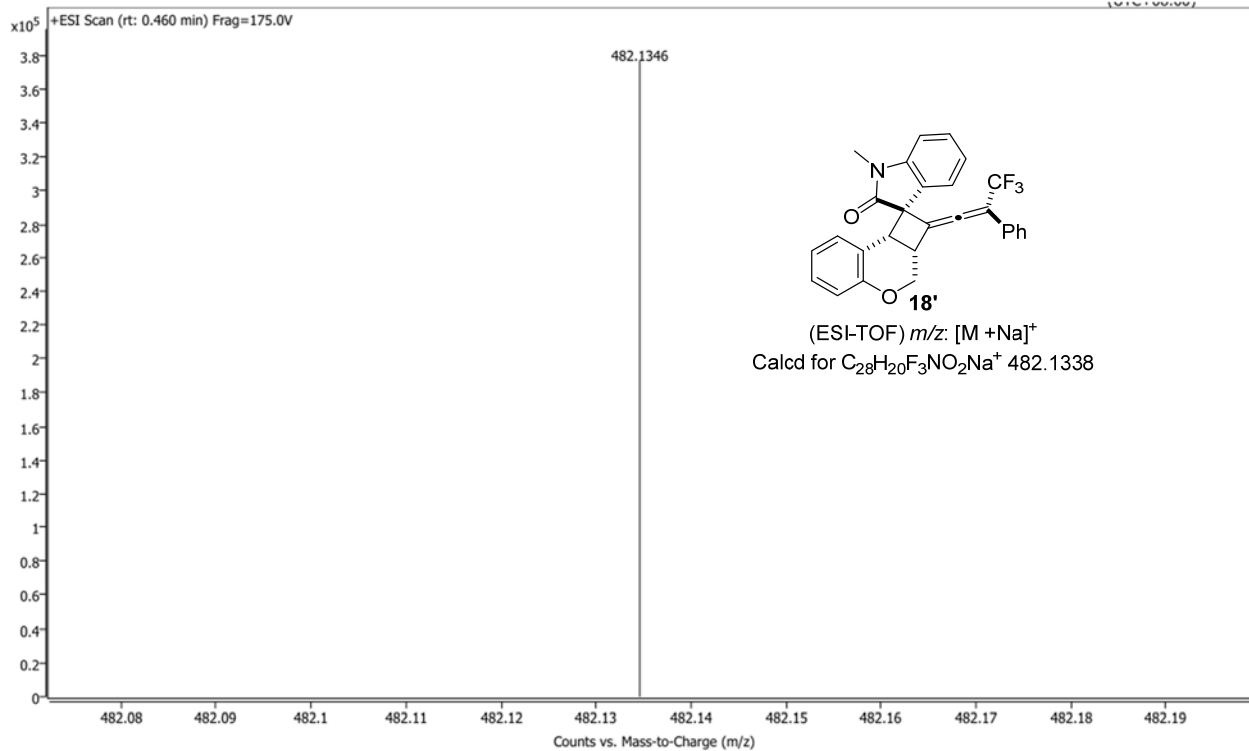

7.694  
7.674  
7.331  
7.311  
7.263  
7.241  
7.217  
7.196  
6.922  
6.902  
6.864  
6.845  
6.826  
6.777  
6.758  
6.739  
6.360  
6.341  
6.013  
5.788  
5.769  
5.495  
5.490  
5.484  
5.480  
5.470  
5.465  
5.458  
5.453

— 3.300  
— 3.076

— 2.475

1.813  
1.802  
1.796  
1.784  
1.779  
1.767  
1.761  
1.747  
1.730  
1.669  
1.652  
1.625  
1.246  
1.228  
1.210  
0.000

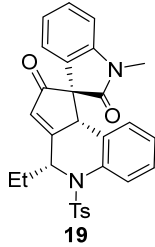

<sup>1</sup>H NMR (400 MHz, CDCl<sub>3</sub>)

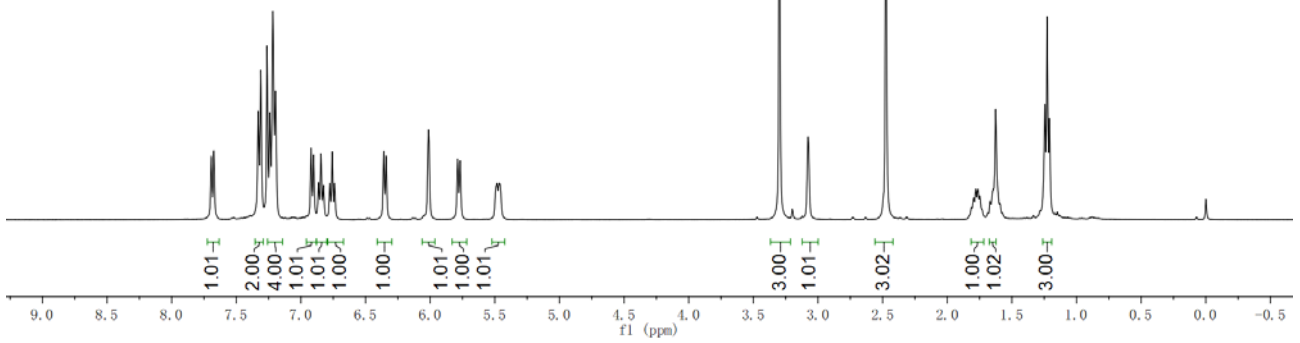

— 198.742  
— 183.164  
— 172.741

145.598  
144.348  
135.620  
134.397  
130.164  
129.735  
129.672  
129.022  
127.599  
127.068  
126.686  
126.423  
125.079  
123.618  
122.881  
122.380  
119.097  
77.362  
77.044  
76.727  
66.516  
59.027  
46.645  
31.246  
26.835  
21.706  
10.873

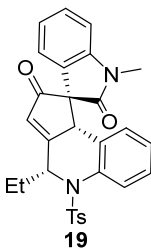

<sup>13</sup>C NMR (100 MHz, CDCl<sub>3</sub>)

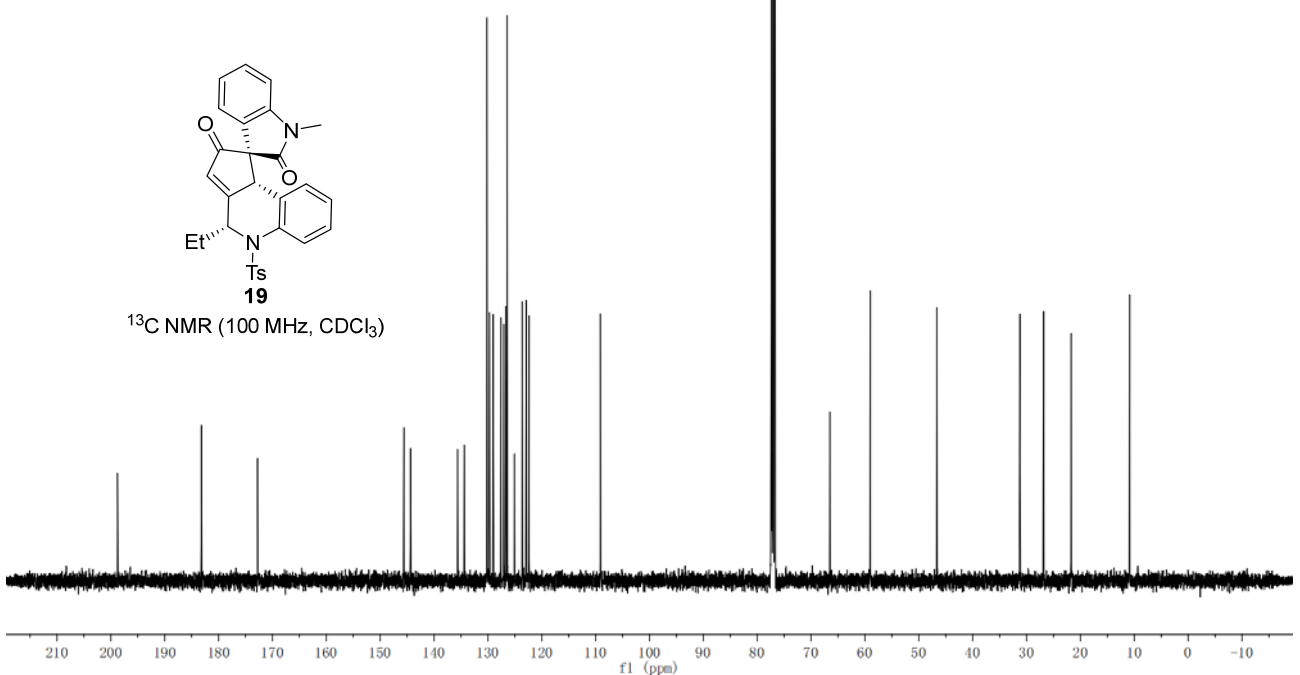

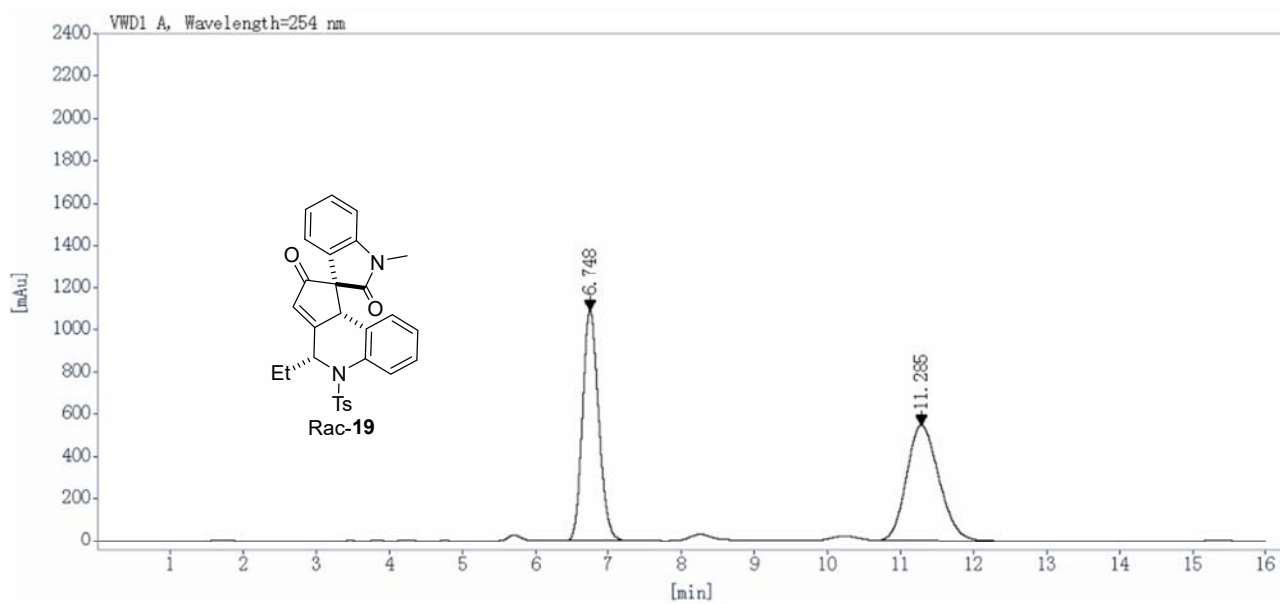

| Ret Time [min] | Peak Type | Width [min] | Height [mAU] | Area [mAU*s] | Area [%] |
|----------------|-----------|-------------|--------------|--------------|----------|
| 6.748          | BBA       | 0.24        | 1091.5602    | 16755.7148   | 50.0150  |
| 11.285         | BBA       | 0.48        | 545.9031     | 16745.6582   | 49.9850  |
| Totals:        |           |             |              | 33501.3730   | 100.0000 |

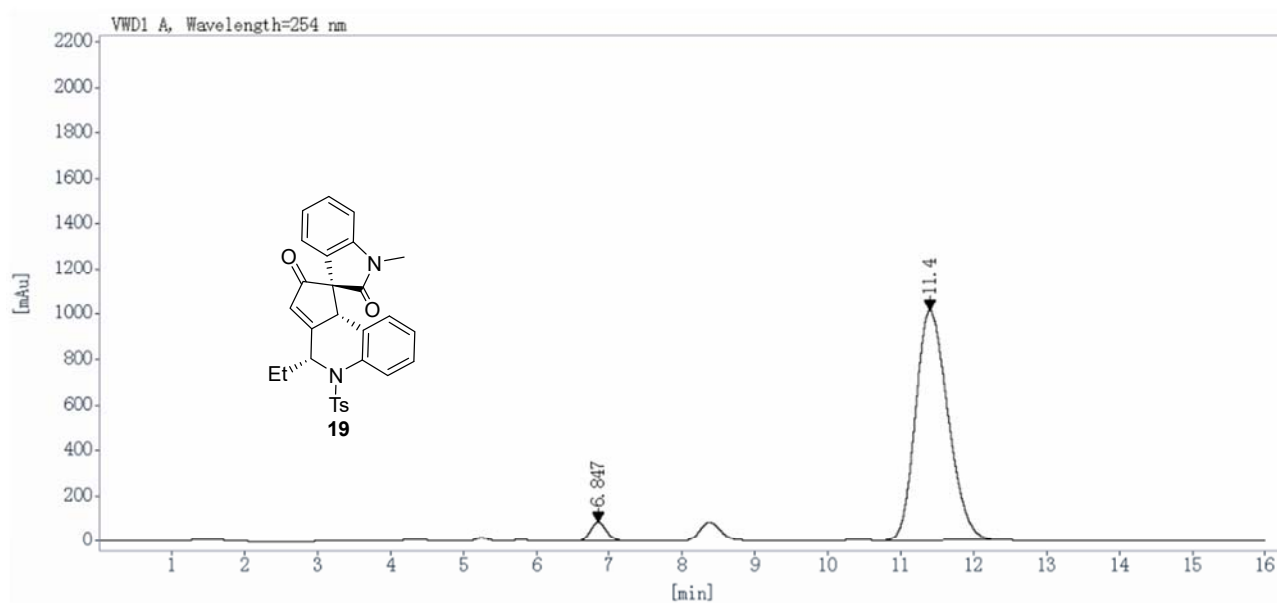

| Ret Time [min] | Peak Type | Width [min] | Height [mAU] | Area [mAU*s] | Area [%] |
|----------------|-----------|-------------|--------------|--------------|----------|
| 6.847          | BBA       | 0.24        | 85.6540      | 1293.7821    | 3.9508   |
| 11.400         | BBA       | 0.48        | 1013.0538    | 31453.7012   | 96.0492  |
| Totals:        |           |             |              | 32747.4833   | 100.0000 |

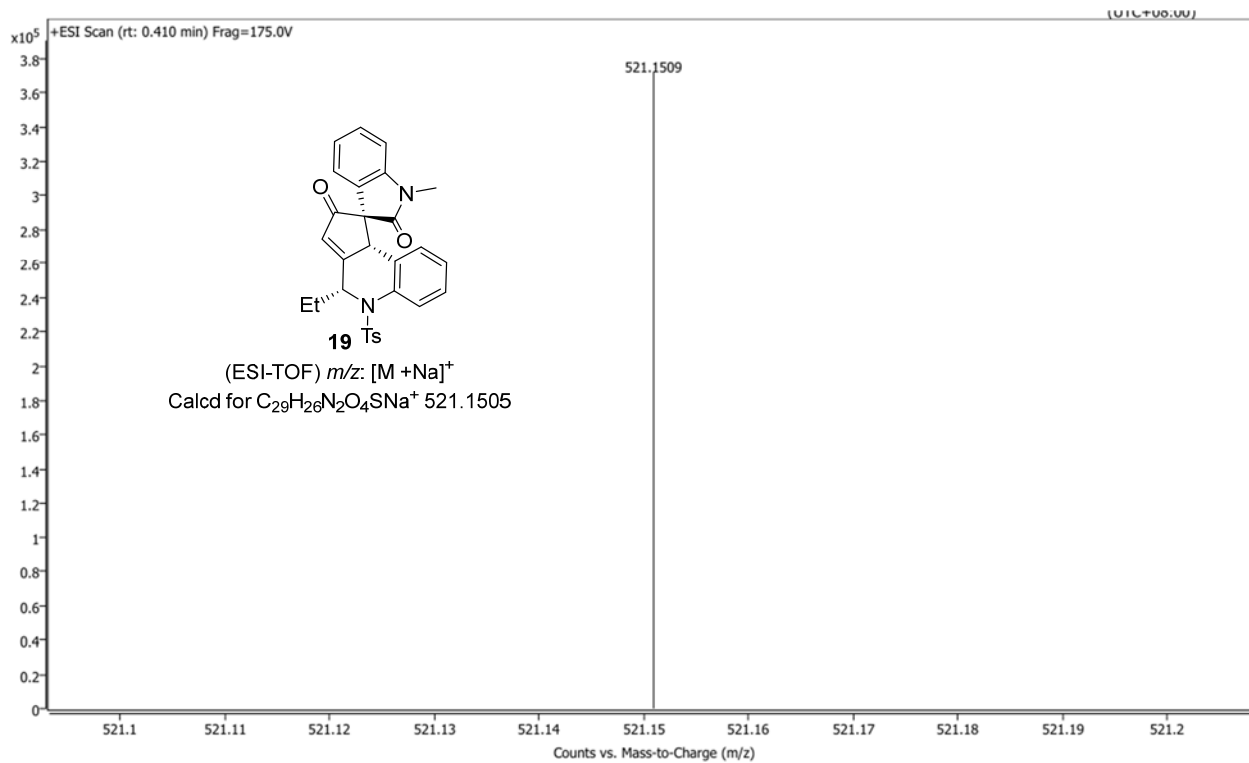



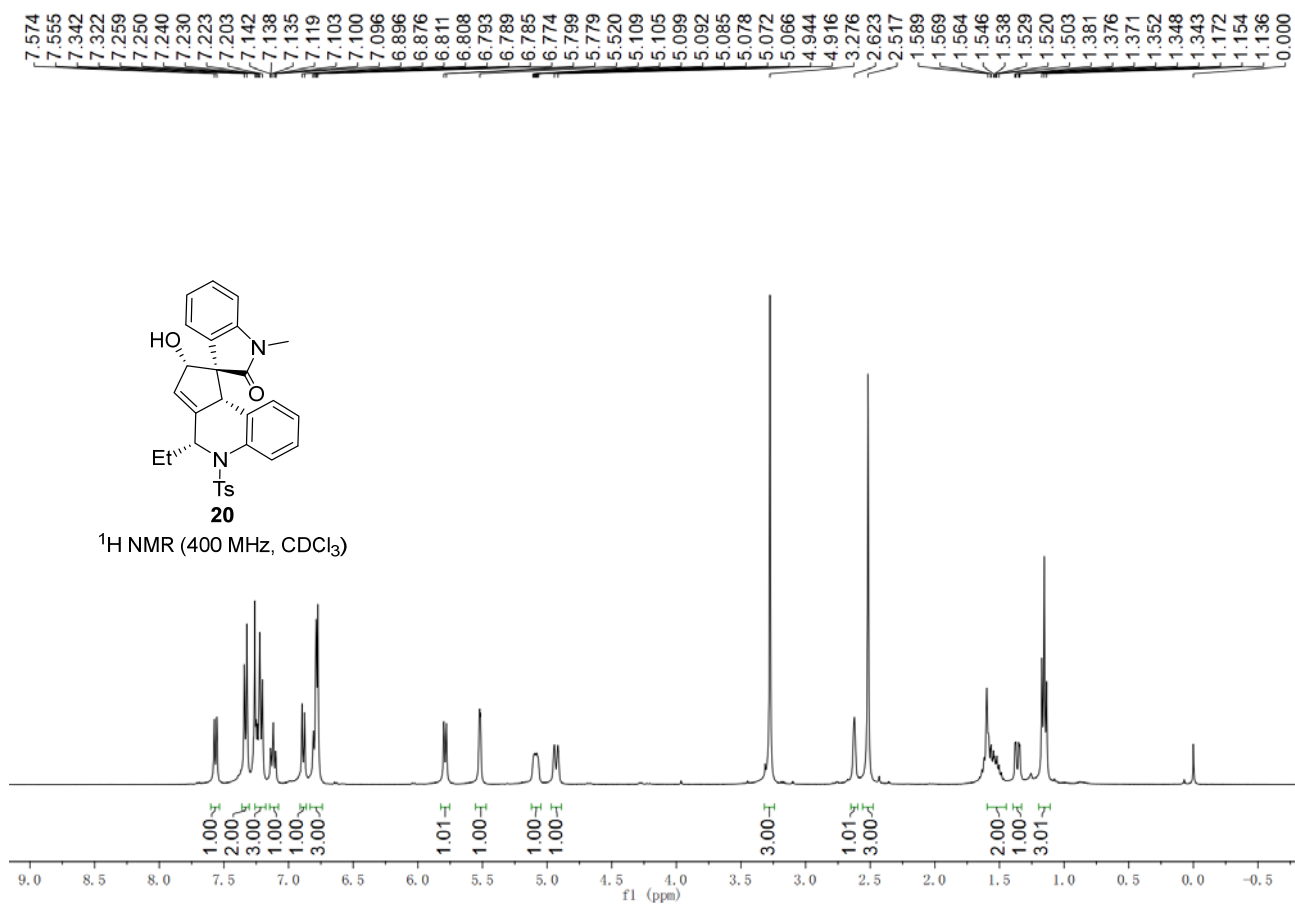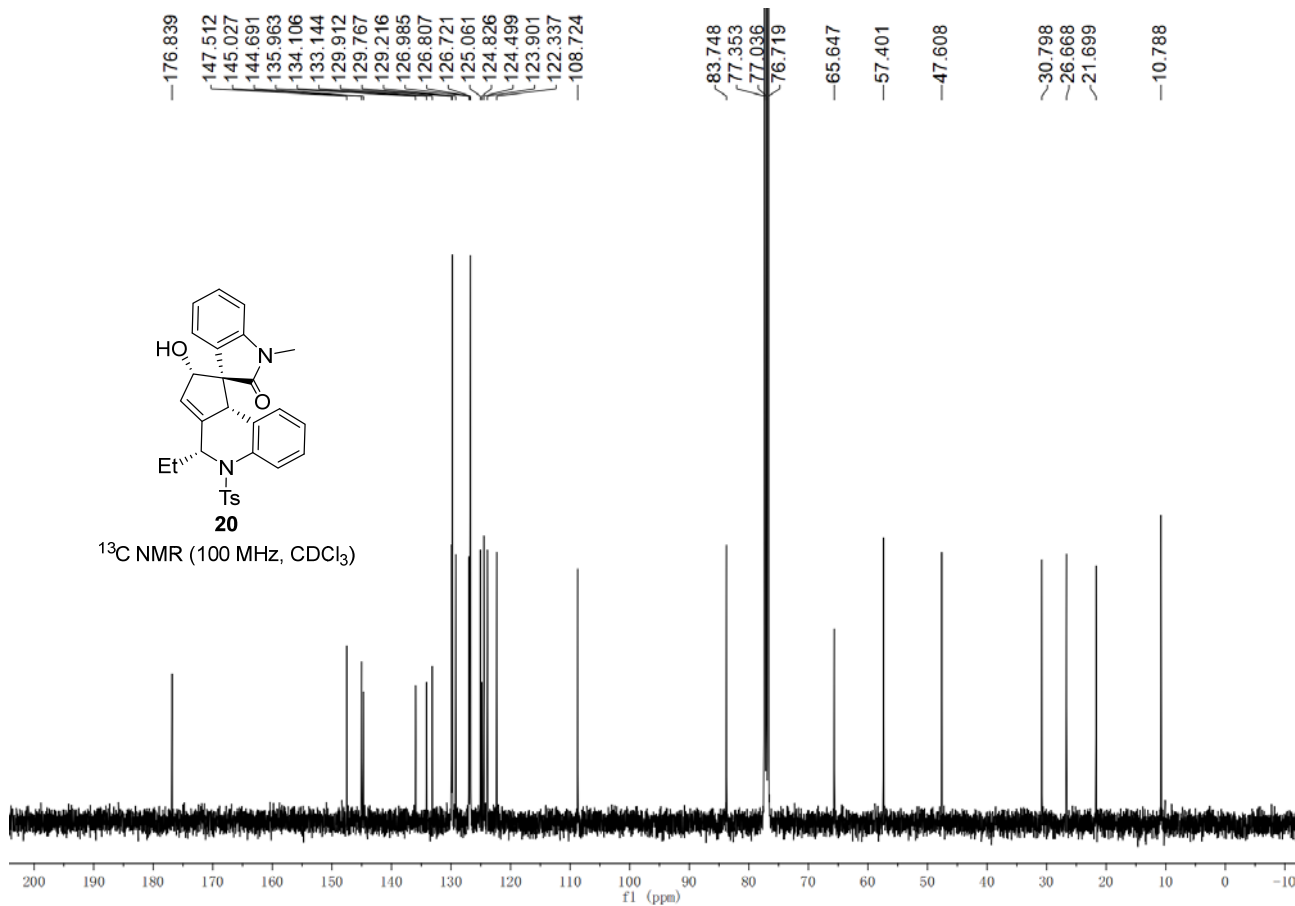

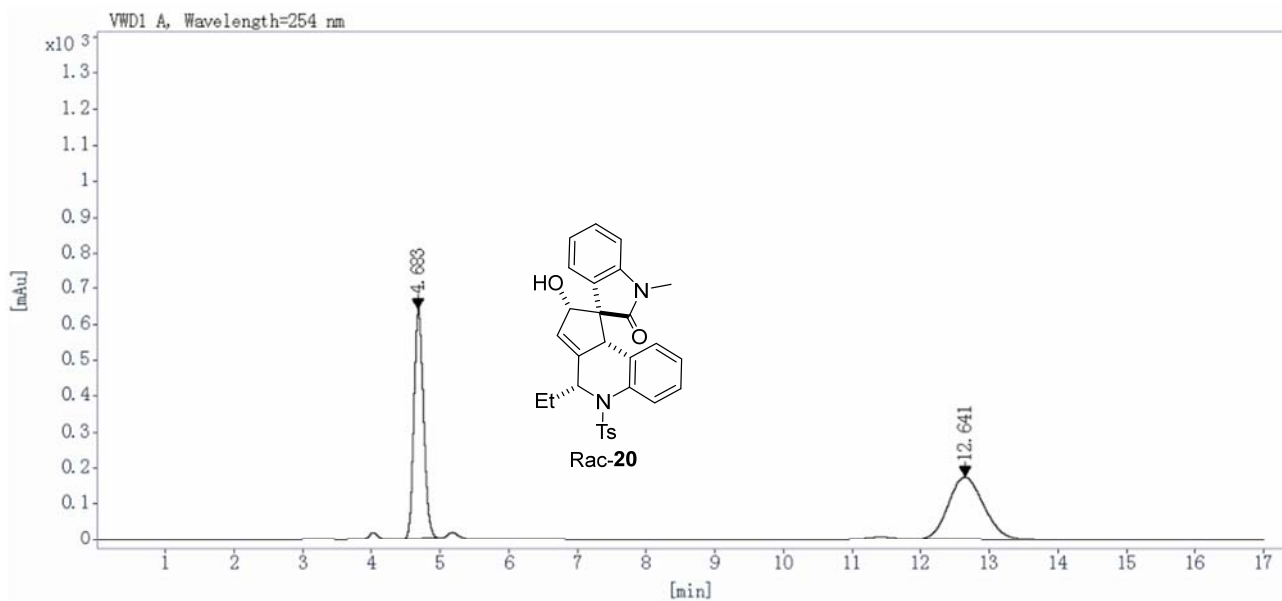

| Ret Time [min] | Peak Type | Width [min] | Height [mAU] | Area [mAU*s] | Area [%] |
|----------------|-----------|-------------|--------------|--------------|----------|
| 4.683          | BBA       | 0.15        | 641.1805     | 6237.6953    | 49.9388  |
| 12.641         | BB        | 0.56        | 174.5945     | 6252.9819    | 50.0612  |
| Totals:        |           |             |              | 12490.6772   | 100.0000 |

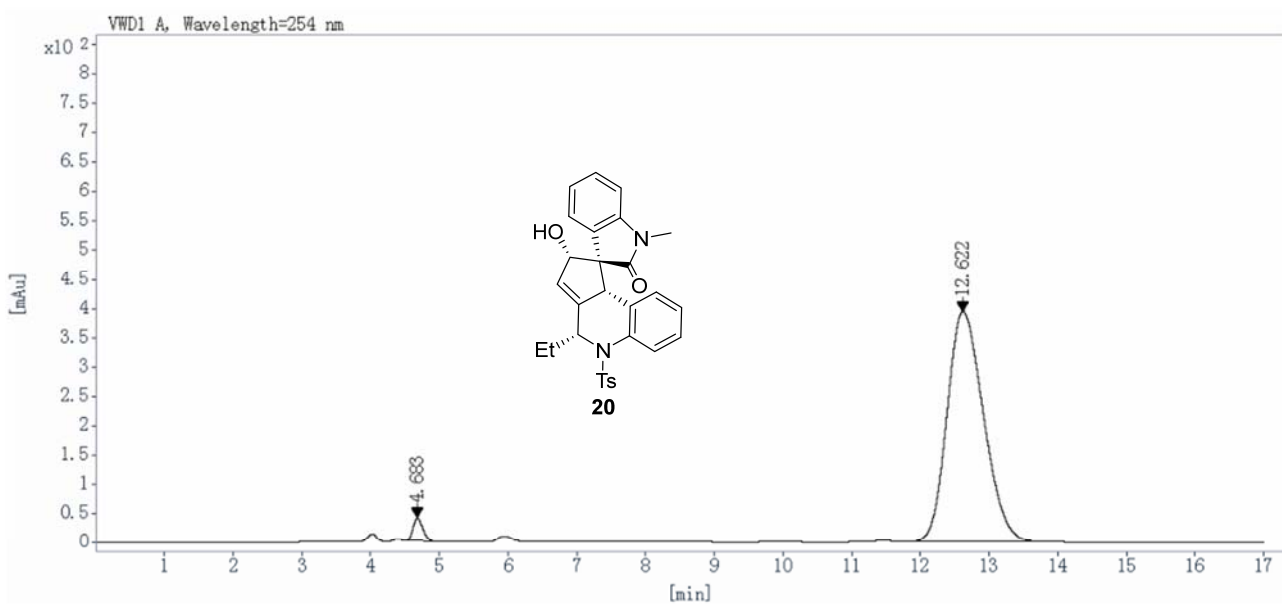

| Ret Time [min] | Peak Type | Width [min] | Height [mAU] | Area [mAU*s] | Area [%] |
|----------------|-----------|-------------|--------------|--------------|----------|
| 4.683          | BB        | 0.15        | 39.5163      | 392.4263     | 2.6313   |
| 12.622         | BBA       | 0.58        | 393.7119     | 14521.3232   | 97.3687  |
| Totals:        |           |             |              | 14913.7496   | 100.0000 |

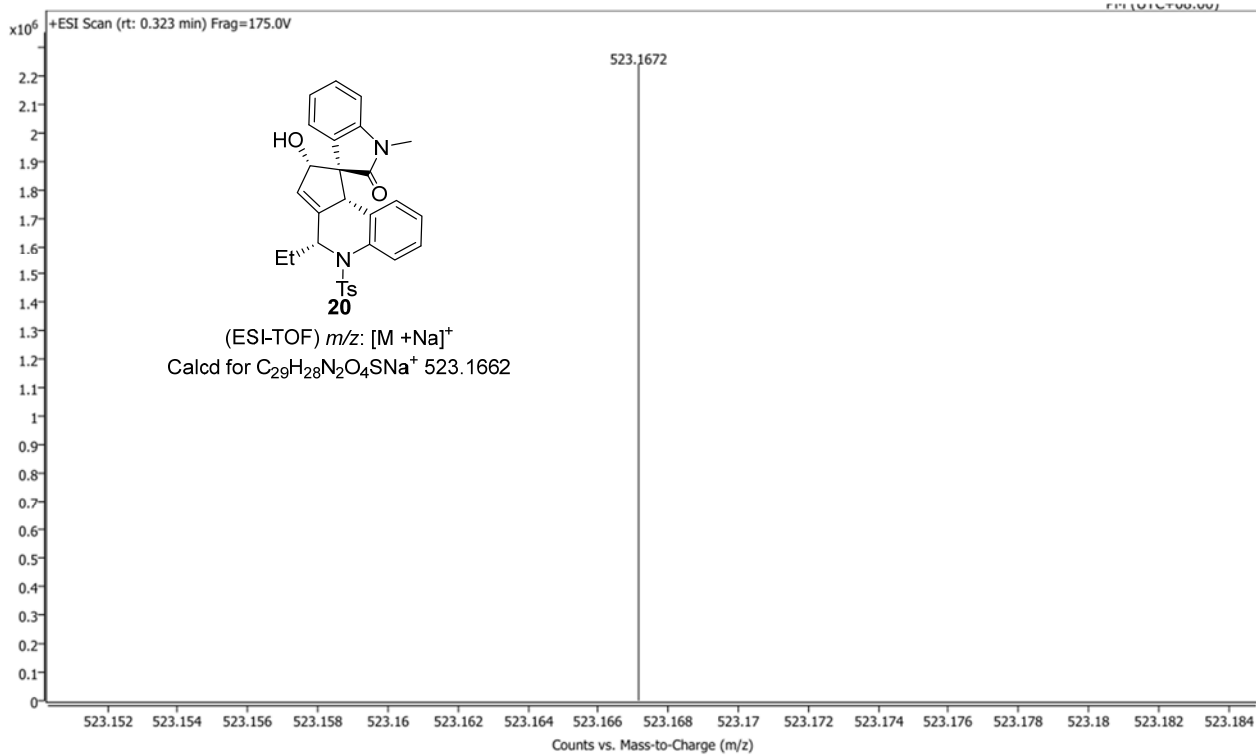

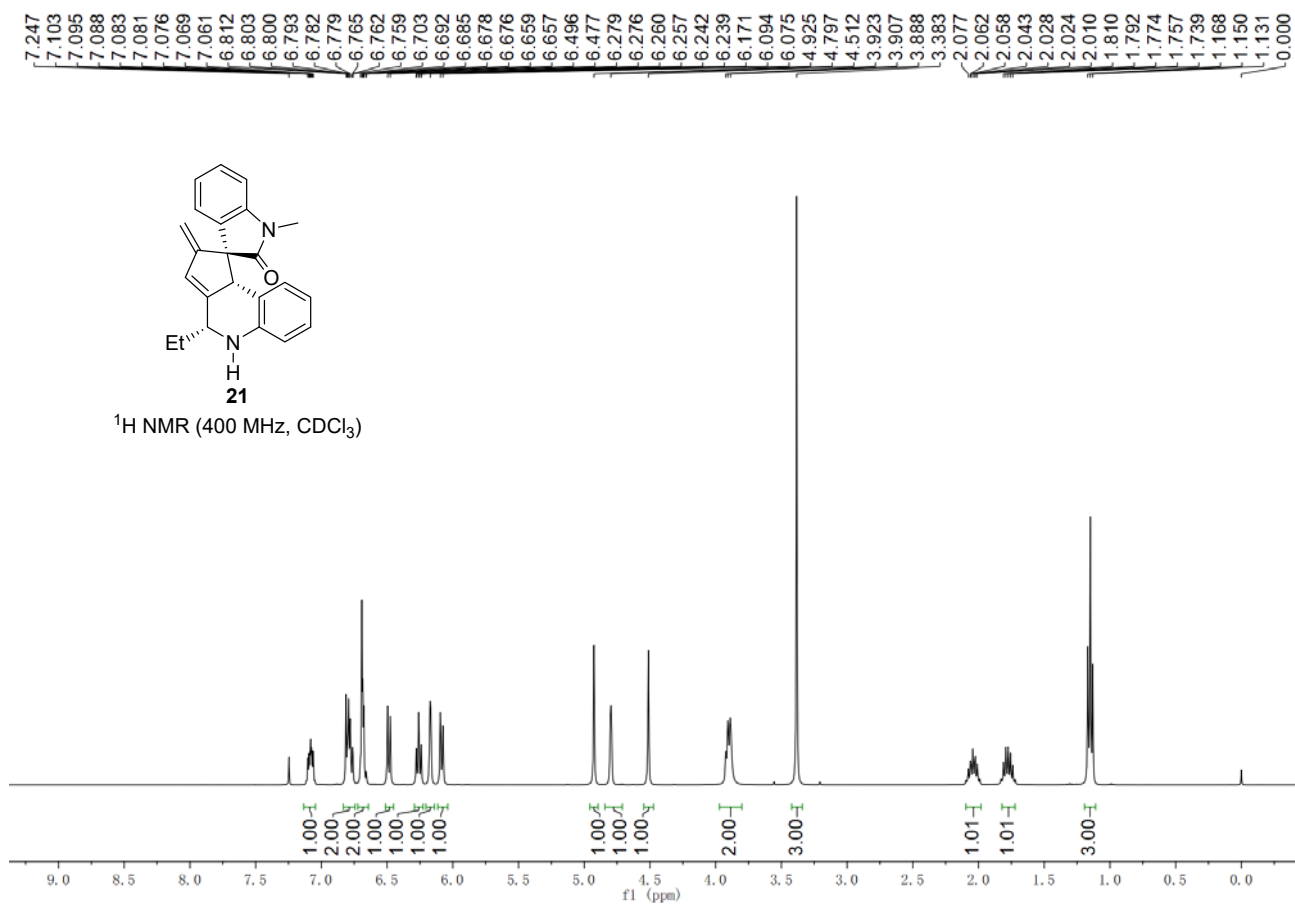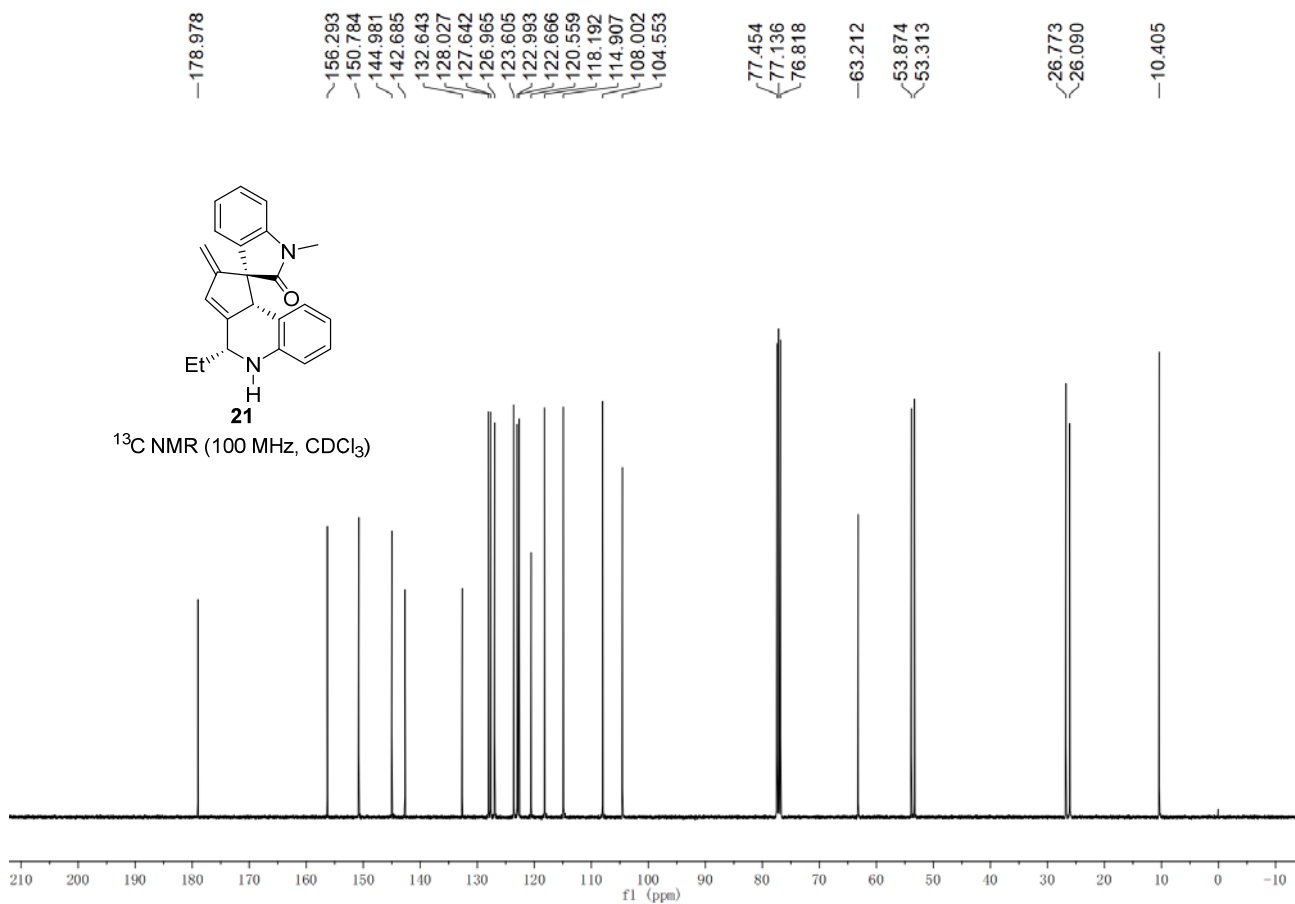

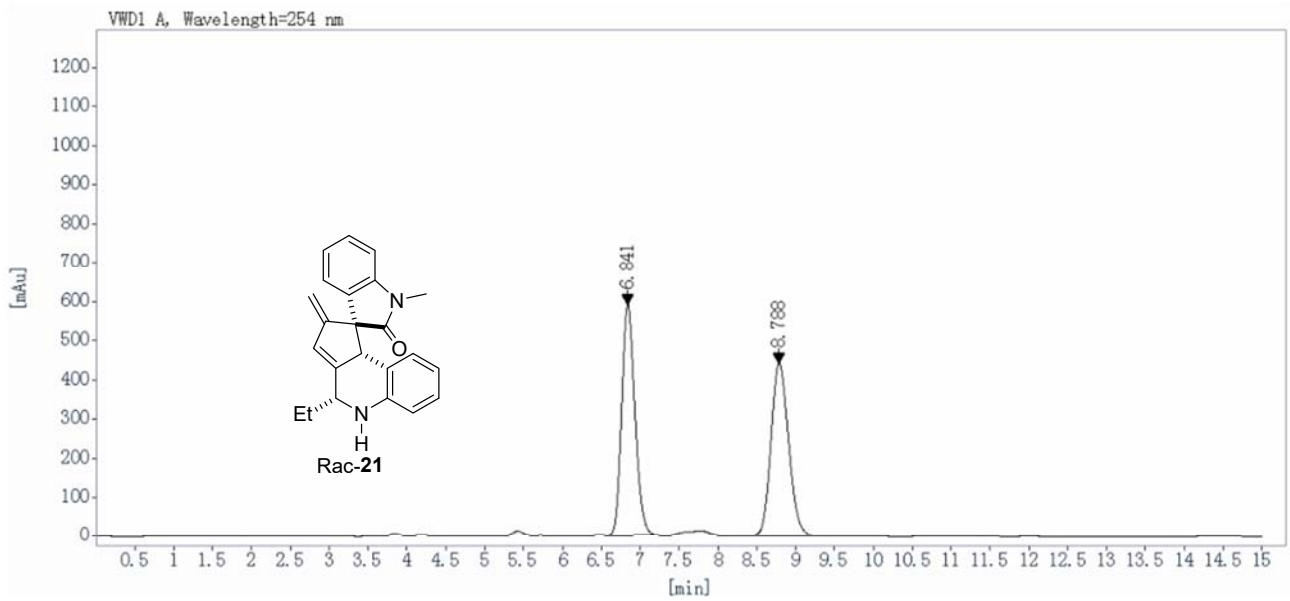

| Ret Time [min] | Peak Type | Width [min] | Height [mAU] | Area [mAU*s] | Area [%] |
|----------------|-----------|-------------|--------------|--------------|----------|
| 6.841          | BBA       | 0.19        | 588.1586     | 7042.9995    | 50.4276  |
| 8.788          | BBA       | 0.24        | 441.0534     | 6923.5688    | 49.5724  |
| Totals:        |           |             |              | 13966.5684   | 100.0000 |

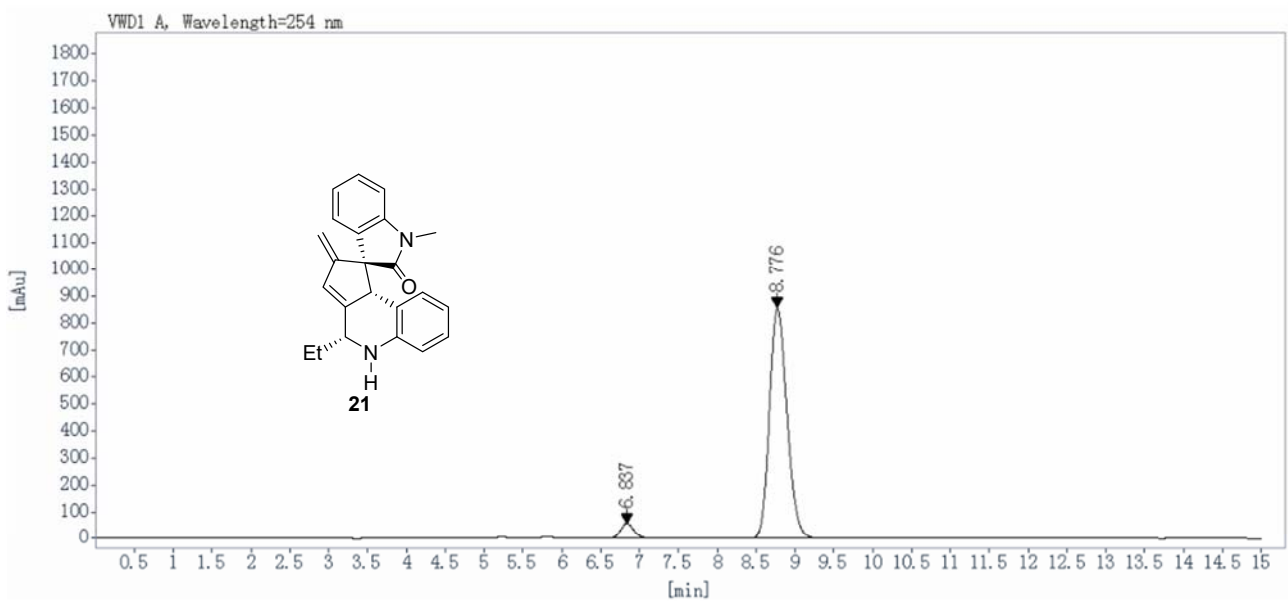

| Ret Time [min] | Peak Type | Width [min] | Height [mAU] | Area [mAU*s] | Area [%] |
|----------------|-----------|-------------|--------------|--------------|----------|
| 6.837          | BB        | 0.18        | 53.7135      | 608.9911     | 4.3398   |
| 8.776          | BBA       | 0.24        | 854.6207     | 13423.7334   | 95.6602  |
| Totals:        |           |             |              | 14032.7245   | 100.0000 |

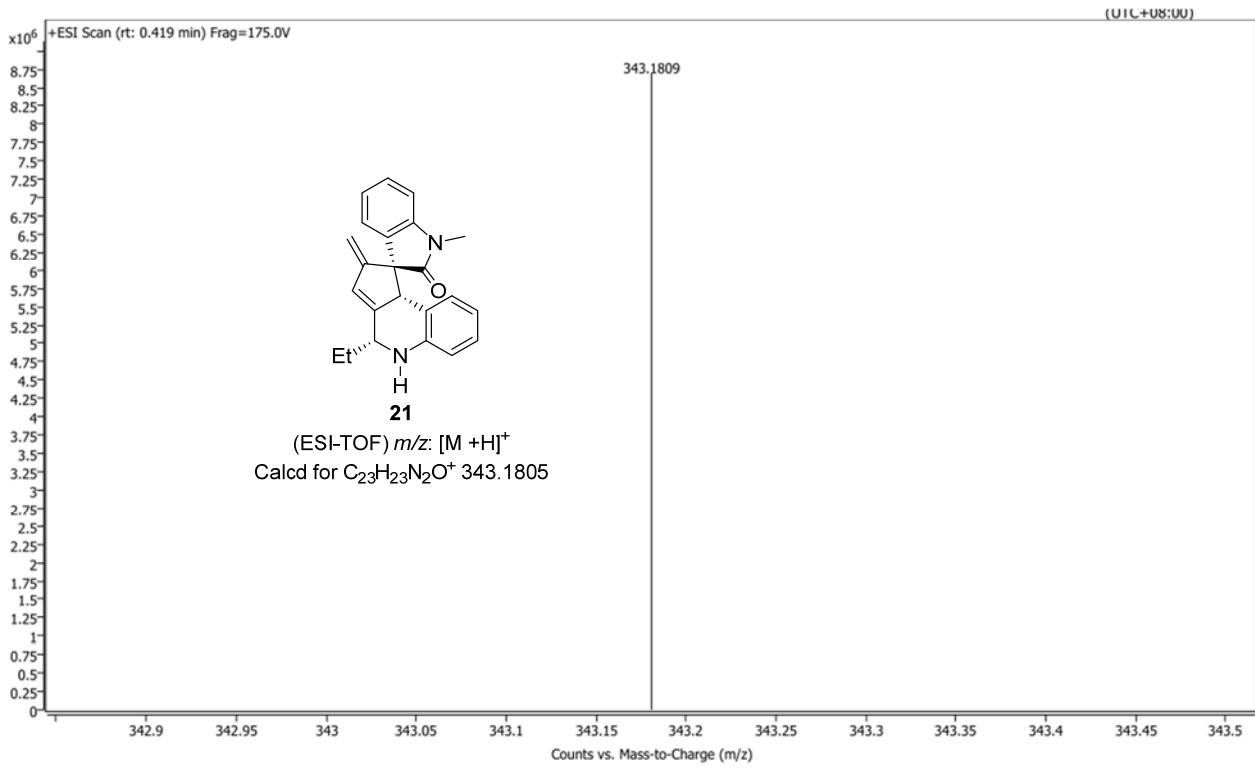

8.034  
8.012  
7.485  
7.481  
7.468  
7.464  
7.460  
7.446  
7.443  
7.414  
7.410  
7.394  
7.391  
7.375  
7.372  
7.261  
7.194  
7.191  
7.177  
7.174  
7.170  
7.156  
7.153  
7.114  
7.094  
6.989  
6.986  
6.970  
6.967  
6.951  
6.948  
6.903  
6.899  
6.895  
6.891  
6.860  
6.840  
6.656  
6.637  
3.461  
3.188  
3.169  
3.150  
3.134  
1.791  
1.678  
1.494  
1.475  
1.456  
0.000

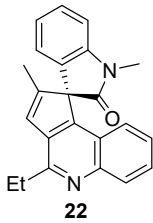

<sup>1</sup>H NMR (400 MHz, CDCl<sub>3</sub>)

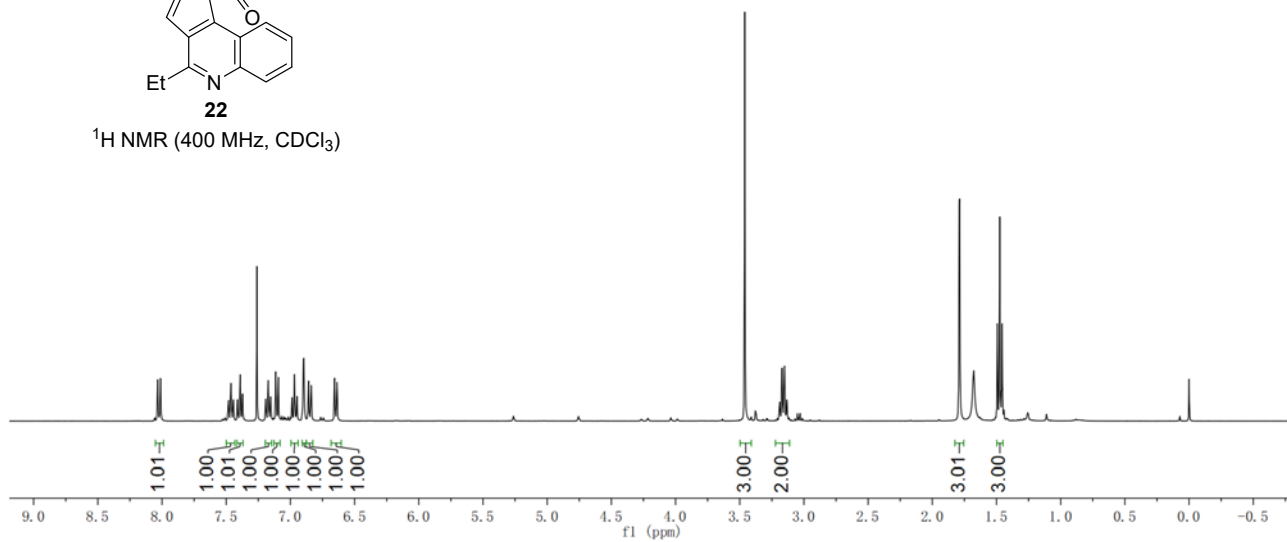

173.722  
157.320  
148.873  
148.414  
146.725  
144.731  
138.275  
129.822  
129.229  
127.847  
127.789  
127.428  
126.421  
123.621  
123.536  
123.136  
121.434  
108.938  
68.376  
29.865  
27.226  
13.653  
12.927

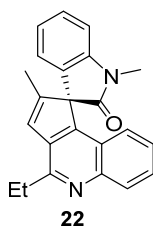

<sup>13</sup>C NMR (100 MHz, CDCl<sub>3</sub>)

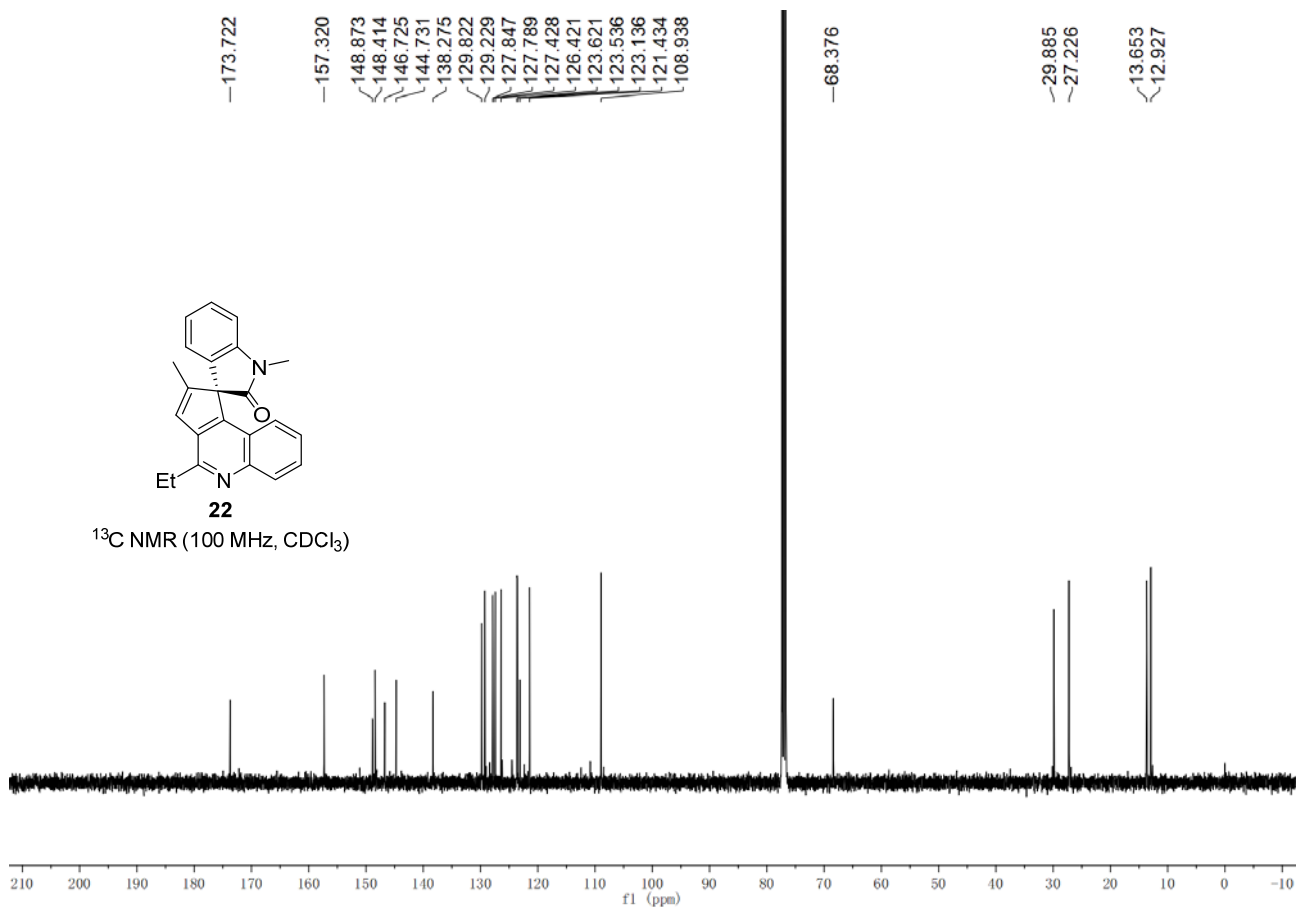

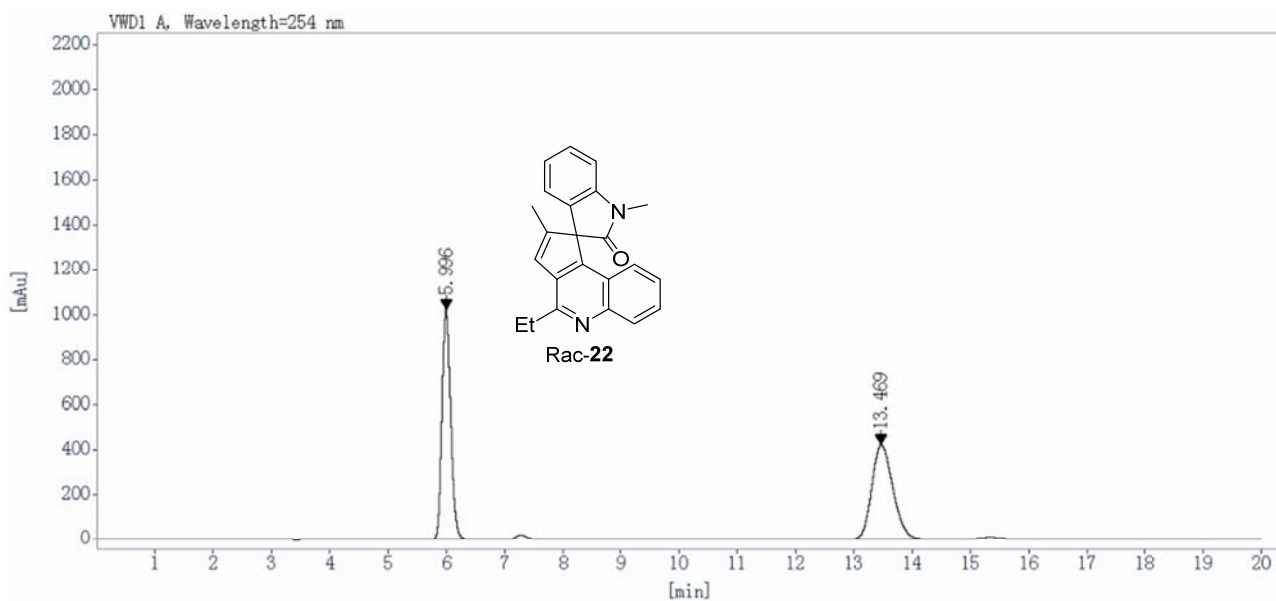

| Ret Time [min] | Peak Type | Width [min] | Height [mAU] | Area [mAU*s] | Area [%] |
|----------------|-----------|-------------|--------------|--------------|----------|
| 5.996          | BBA       | 0.16        | 1023.4622    | 10605.2090   | 49.9482  |
| 13.469         | BBA       | 0.39        | 422.5282     | 10627.2080   | 50.0518  |
| Totals:        |           |             |              | 21232.4170   | 100.0000 |

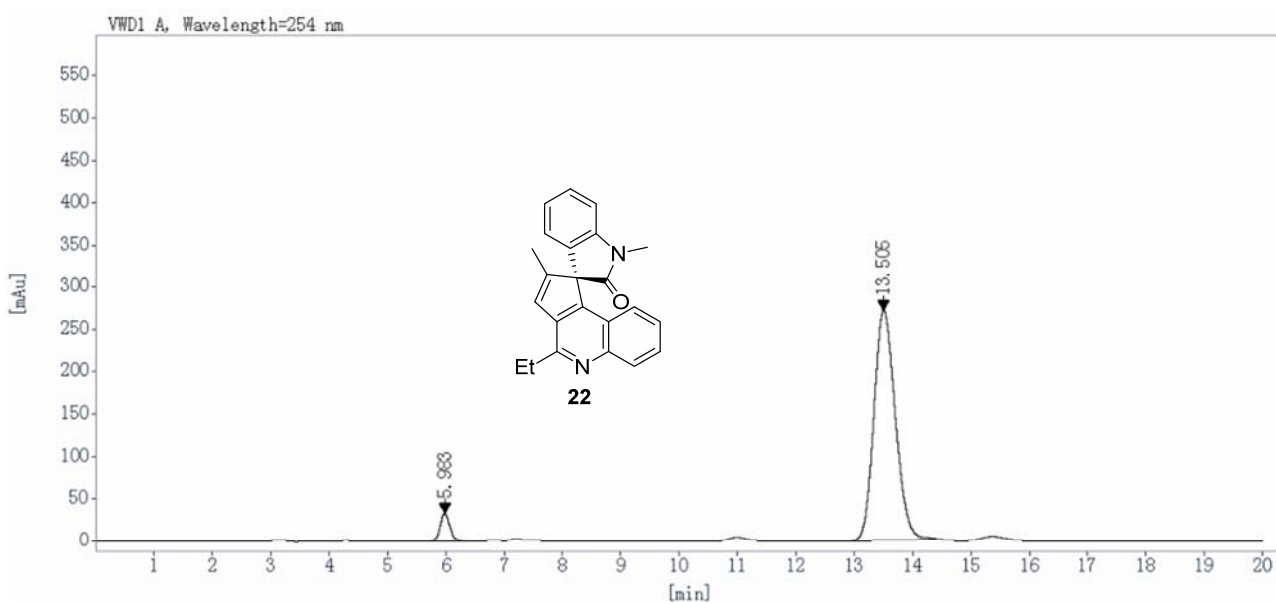

| Ret Time [min] | Peak Type | Width [min] | Height [mAU] | Area [mAU*s] | Area [%] |
|----------------|-----------|-------------|--------------|--------------|----------|
| 5.983          | BBA       | 0.17        | 32.8479      | 365.9035     | 5.0099   |
| 13.505         | BBA       | 0.40        | 271.3038     | 6937.6753    | 94.9901  |
| Totals:        |           |             |              | 7303.5788    | 100.0000 |



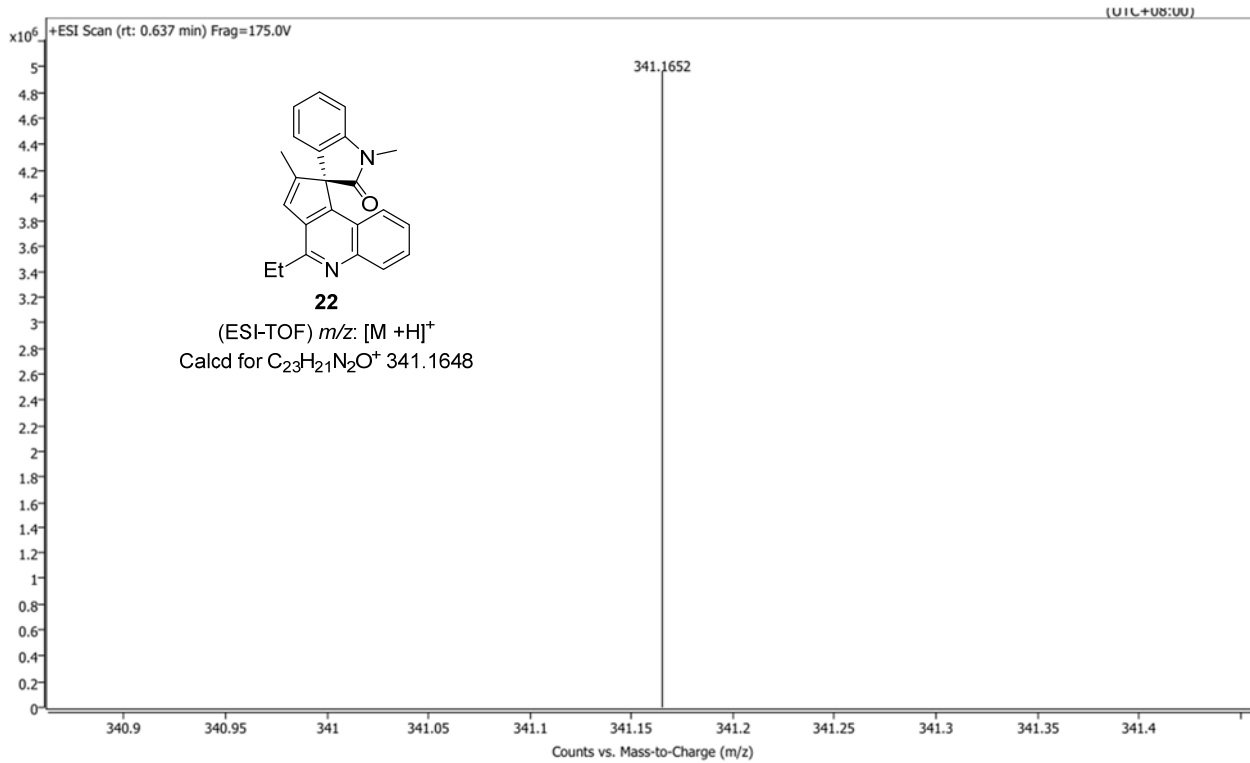

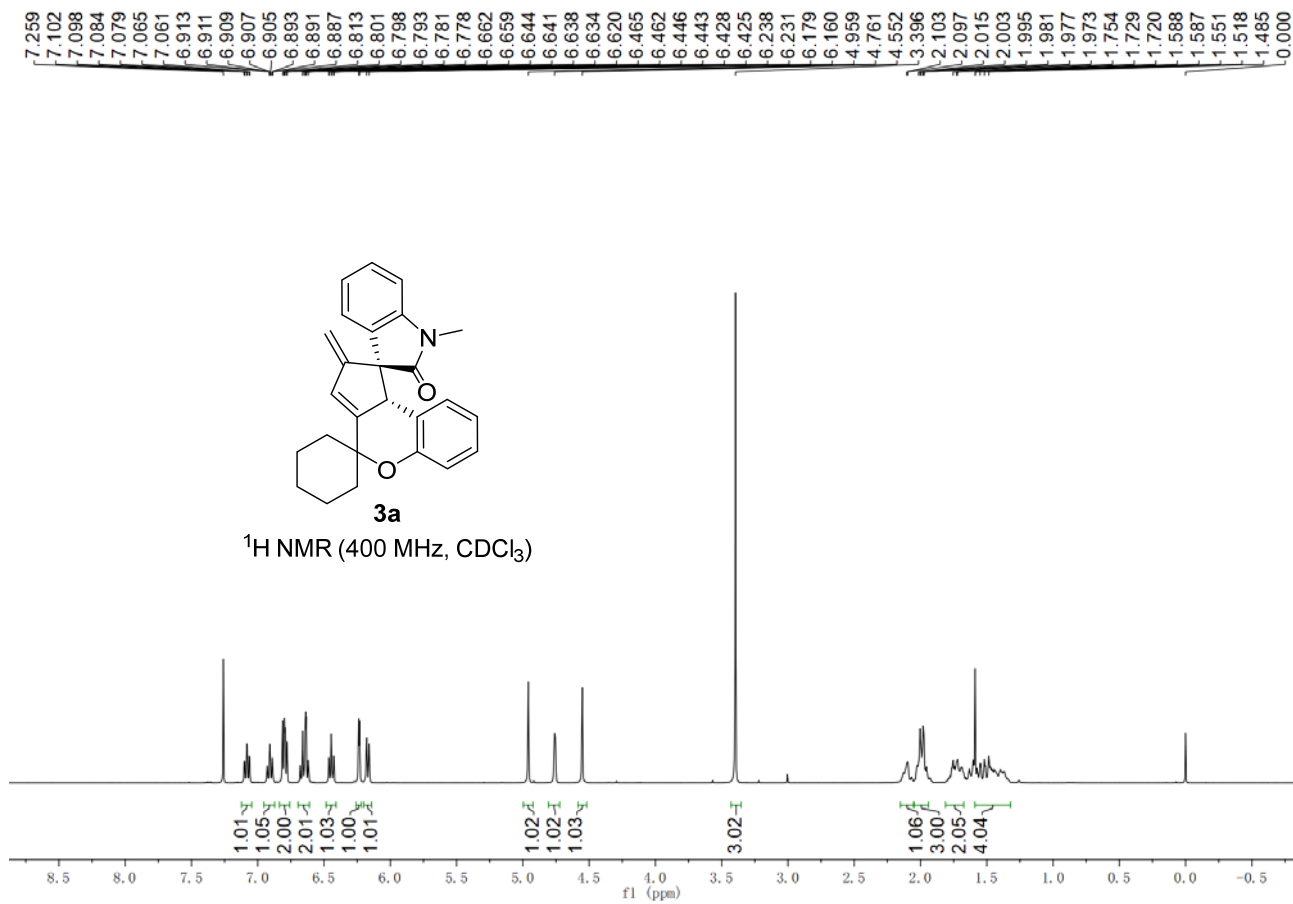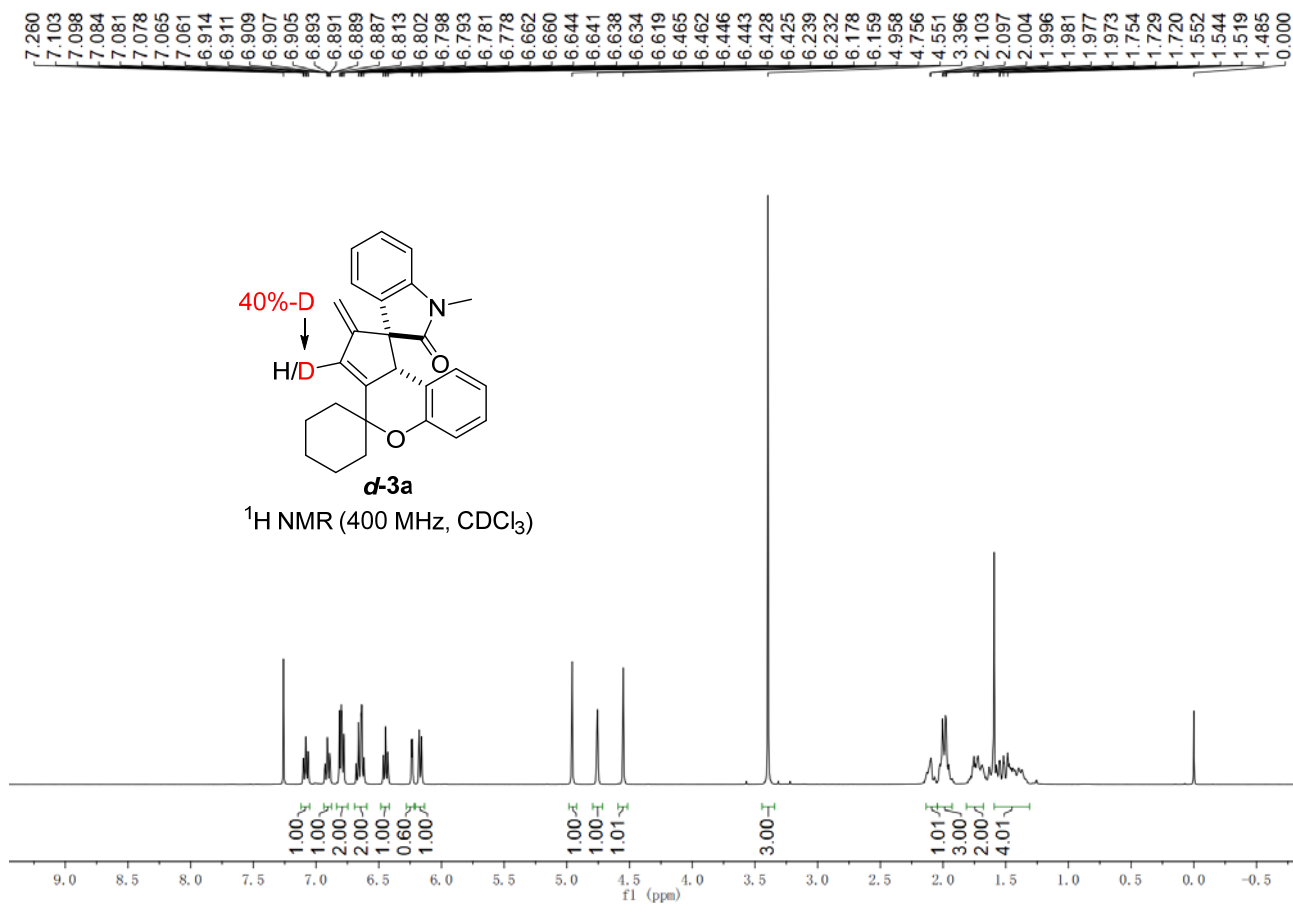

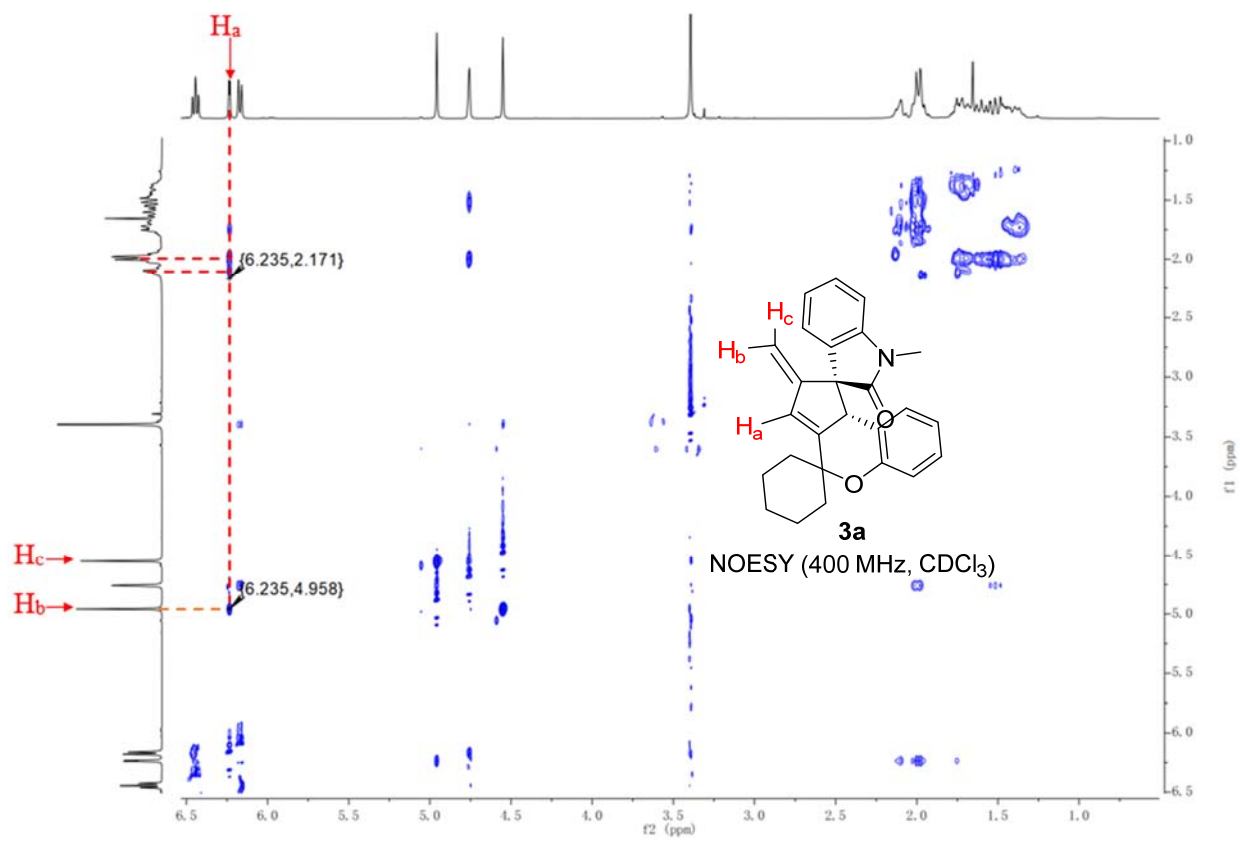

Supplement: d4sc07823c1.pdf [file d4sc07823c1.pdf]
